# Supplementary material for: MARK2 regulates Golgi apparatus reorientation by phosphorylation of CAMSAP2 in directional cell migratio
Source: eLife journal article supplement (doi:10.7554/elife.105977), 2025-03-26
Supplement: fig1-data1 [file Figure1E source data 1.xlsx]

## Sheet: Sheet1
2h-complete	2h-partial
0.566	0.363
0.453	0.303
0.569	0.385
0.549	0.265
0.498	0.484
0.412	0.355
0.412	0.19
0.508	0.263
0.569	0.384
0.47	0.29
0.431	0.311
0.502	0.333
0.486	0.396
0.419	0.289
0.537	0.309
0.361	0.284
0.437	0.369
0.497	0.351
0.358	0.326
0.424
