# Supplementary material for: MARK2 regulates Golgi apparatus reorientation by phosphorylation of CAMSAP2 in directional cell migratio
Source: eLife journal article supplement (doi:10.7554/elife.105977), 2025-03-26
Supplement: fig1-figsupp1-data3 [file Figure 1-figure supplement 1D source data 1.xlsx]

## Sheet: Sheet1
HT1080	CAMSAP2 KO
50.178	582.616
48.382	577.994
39.931	553.777
60.953	540.784
60.292	522.614
33.645	514.084
55.697	509.092
19.147	506.055
66.208	494.805
37.633	486.539
23.346	482.947
20.52	465.834
23.029	460.948
29.843	445.737
44.658	427.963
35.151	424.873
39.931	407.258
20.599	388.956
55.169	386.527
17.166	368.489
27.043	365.399
23.161	360.831
24.429	351.112
14.921	345.223
14.921	341.261
55.354	336.534
56.437	330.011
85.012	313.188
20.018	293.434
35.23	290.37
36.075	283.266
28.575	280.757
13.02	269.269
27.651	267.077
31.612	265.519
29.895	250.598
35.415	237.129
20.045	224.162
16.347	222.472
25.96	219.435
21.022	210.033
19.516	208.554
41.568	206.785
32.404	206.547
30.107	201.794
10.062	200.843
21.55	200.5
16.057	200.341
14.604	194.61
54.799	190.517
32.219	182.383
35.019	181.432
30.107	180.402
11.039	179.029
35.124	177.708
4.305	176.177
33.91	175.094
17.589	173.324
14.868	173.06
24.191	170.578
44.209	163.342
46.665	163.157
19.939	160.621
27.598	159.116
26.145	158.72
29.209	156.475
50.415	150.295
27.07	149.926
32.642	146.862
52.845	142.901
78.568	141.633
22.105	140.366
47.299	139.019
65.416	138.042
63.435	137.857
39.403	136.431
68.374	136.299
44.077	135.744
30.476	133.42
76.032	130.7
49.042	128.429
31.348	127.214
10.59	124.784
33.064	123.516
49.914	123.358
71.86	121.06
47.88	119.74
40.037	119.344
61.851	115.567
60.583	115.435
27.967	112.662
21.497	111.896
22.659	111.87
19.226	109.81
33.434	107.38
40.934	106.456
28.469	105.822
23.214	104.66
38.69	104.37
33.83	102.679
42.545	100.778
24.746	93.093
16.981	92.776
	89.818
	88.577
	88.075
	87.917
	86.121
	86.094
	82.582
	78.753
	72.15
	71.965
	71.543
	66.736
	56.384
	51.577
	40.037
	23.9
