# Supplementary material for: MARK2 regulates Golgi apparatus reorientation by phosphorylation of CAMSAP2 in directional cell migratio
Source: eLife journal article supplement (doi:10.7554/elife.105977), 2025-03-26
Supplement: fig1-figsupp1-data3 [file Figure 1-figure supplement 1E source data 1.xlsx]

## Sheet: Sheet1
HT1080	CAMSAP2 KO
0.473389	0.559759
0.380557	0.421753
0.603363	0.546528
0.7559	0.777958
