# Supplementary material for: MARK2 regulates Golgi apparatus reorientation by phosphorylation of CAMSAP2 in directional cell migratio
Source: eLife journal article supplement (doi:10.7554/elife.105977), 2025-03-26
Supplement: fig1-figsupp1-data3 [file Figure 1-figure supplement 1G source data 1.xlsx]

## Sheet: HT1080
	HT1080-1质心坐标	高尔基体Xg	Yg	细胞核Xn	Yn	Tanb	arcTanb	b-degrees	|b-degrees|	象限1	象限3	象限2	象限4	象限求和	加90度	360角度	Distance	1、4象限的个数	总个数	比例
1	划痕HT1080-2H-04hao用.czi:c:2/4 - 划痕HT1080-2H-04hao用.czi #1	32.728	73.321	39.643	71.687	4.23195	1.33875	76.705	76.705	0	0	0	4	4	270	346.705	7.10543	1	20	0.95	0.95
2	划痕HT1080-2H-04hao用.czi:c:2/4 - 划痕HT1080-2H-04hao用.czi #1	45.271	91.107	48.109	92.937	-1.55082	-0.998071	-57.1853	57.1853	0	3	0	0	3	180	237.185	3.37685
3	划痕HT1080-2H-04hao用.czi:c:2/4 - 划痕HT1080-2H-04hao用.czi #1	73.188	92.777	66.9	89.174	1.74521	1.05047	60.1875	60.1875	1	0	0	0	1	0	60.1875	7.24711
4	划痕HT1080-2H-04hao用.czi:c:2/4 - 划痕HT1080-2H-04hao用.czi #1	87.825	69.204	81.723	63.904	1.15132	0.855621	49.0235	49.0235	1	0	0	0	1	0	49.0235	8.08235
5	划痕HT1080-2H-04hao用.czi:c:2/4 - 划痕HT1080-2H-04hao用.czi #1	118.772	60.908	126.003	59.548	5.31691	1.38489	79.3483	79.3483	0	0	0	4	4	270	349.348	7.35778
6	划痕HT1080-2H-04hao用.czi:c:2/4 - 划痕HT1080-2H-04hao用.czi #1	144.572	68.315	150.999	61.714	0.97364	0.772043	44.2348	44.2348	0	0	0	4	4	270	314.235	9.21301
7	划痕HT1080-2H-04hao用.czi:c:2/4 - 划痕HT1080-2H-04hao用.czi #1	186.719	74.117	182.077	66.153	0.582873	0.527731	30.2368	30.2368	1	0	0	0	1	0	30.2368	9.21811
8	划痕HT1080-2H-04hao用.czi:c:2/4 - 划痕HT1080-2H-04hao用.czi #1	211.749	62.398	219.496	59.045	2.31047	1.16233	66.5964	66.5964	0	0	0	4	4	270	336.596	8.44148
9	划痕HT1080-2H-10.czi:c:2/4 - 划痕HT1080-2H-10.czi #1	11.796	69.952	11.44	62.769	0.0495615	0.0495209	2.83734	2.83734	1	0	0	0	1	0	2.83734	7.19182
10	划痕HT1080-2H-10.czi:c:2/4 - 划痕HT1080-2H-10.czi #1	38.647	46.833	40.372	39.61	0.23882	0.234429	13.4318	13.4318	0	0	0	4	4	270	283.432	7.42613
11	划痕HT1080-2H-10.czi:c:2/4 - 划痕HT1080-2H-10.czi #1	63.969	61.513	68.866	53.138	0.584716	0.529106	30.3155	30.3155	0	0	0	4	4	270	300.316	9.70161
12	划痕HT1080-2H-10.czi:c:2/4 - 划痕HT1080-2H-10.czi #1	101.339	71.235	92.783	66.982	2.01176	1.10949	63.569	63.569	1	0	0	0	1	0	63.569	9.55474
13	划痕HT1080-2H-10.czi:c:2/4 - 划痕HT1080-2H-10.czi #1	148.482	82.33	153.696	75.485	0.761724	0.650962	37.2974	37.2974	0	0	0	4	4	270	307.297	8.60464
14	划痕HT1080-2H-10.czi:c:2/4 - 划痕HT1080-2H-10.czi #1	211.619	90.588	216.173	82.782	0.583397	0.528122	30.2592	30.2592	0	0	0	4	4	270	300.259	9.03729
15	划痕HT1080-2H-25haoBUYONG.czi:c:2/4 - 划痕HT1080-2H-25haoBUYONG.czi #1	7.898	69.525	14.492	66.94	2.55087	1.19719	68.5937	68.5937	0	0	0	4	4	270	338.594	7.08259
16	划痕HT1080-2H-25haoBUYONG.czi:c:2/4 - 划痕HT1080-2H-25haoBUYONG.czi #1	35.672	100.305	39.414	94.546	0.649766	0.57621	33.0144	33.0144	0	0	0	4	4	270	303.014	6.86794
17	划痕HT1080-2H-25haoBUYONG.czi:c:2/4 - 划痕HT1080-2H-25haoBUYONG.czi #1	54.651	74.045	55.813	67.105	0.167435	0.165896	9.50516	9.50516	0	0	0	4	4	270	279.505	7.03661
18	划痕HT1080-2H-25haoBUYONG.czi:c:2/4 - 划痕HT1080-2H-25haoBUYONG.czi #1	96.788	86.856	95.786	79.838	0.142776	0.141817	8.12553	8.12553	1	0	0	0	1	0	8.12553	7.08917
19	划痕HT1080-2H-25haoBUYONG.czi:c:2/4 - 划痕HT1080-2H-25haoBUYONG.czi #1	125.048	78.423	118.816	77.638	7.93885	1.44549	82.8207	82.8207	1	0	0	0	1	0	82.8207	6.28125
20	划痕HT1080-2H-25haoBUYONG.czi:c:2/4 - 划痕HT1080-2H-25haoBUYONG.czi #1	161.647	78.244	159.014	70.327	0.332575	0.321068	18.3959	18.3959	1	0	0	0	1	0	18.3959	8.34336
21	划痕HT1080-2H-25haoBUYONG.czi:c:2/4 - 划痕HT1080-2H-25haoBUYONG.czi #1	194.579	90.72	188.46	88.737	3.08573	1.2574	72.0439	72.0439	1	0	0	0	1	0	72.0439	6.4323
22	划痕HT1080-2H-35好.czi:c:2/4 - 划痕HT1080-2H-35好.czi #1	11.92	88.05	13.304	85.819	0.62035	0.555248	31.8134	31.8134	0	0	0	4	4	270	301.813	2.62542	3	22	0.863636	0.864
23	划痕HT1080-2H-35好.czi:c:2/4 - 划痕HT1080-2H-35好.czi #1	7.453	72.166	17.495	65.132	1.42764	0.959763	54.9904	54.9904	0	0	0	4	4	270	324.99	12.2605
24	划痕HT1080-2H-35好.czi:c:2/4 - 划痕HT1080-2H-35好.czi #1	77.847	69.922	74.967	62.19	0.372478	0.356558	20.4293	20.4293	1	0	0	0	1	0	20.4293	8.25095
25	划痕HT1080-2H-35好.czi:c:2/4 - 划痕HT1080-2H-35好.czi #1	127.537	66.91	121.084	62.016	1.31855	0.921936	52.8231	52.8231	1	0	0	0	1	0	52.8231	8.09892
26	划痕HT1080-2H-35好.czi:c:2/4 - 划痕HT1080-2H-35好.czi #1	163.468	81.88	160.75	76.559	0.510806	0.472255	27.0582	27.0582	1	0	0	0	1	0	27.0582	5.97499
27	划痕HT1080-2H-35好.czi:c:2/4 - 划痕HT1080-2H-35好.czi #1	187.334	73.393	180.602	79.049	-1.19024	-0.872039	-49.9642	49.9642	0	0	2	0	2	90	139.964	8.79262
28	划痕HT1080-2H-35好.czi:c:2/4 - 划痕HT1080-2H-35好.czi #1	213.604	62.052	219.453	58.634	1.71123	1.04195	59.6991	59.6991	0	0	0	4	4	270	329.699	6.77448
29	划痕HT1080-2H-38前.czi:c:2/4 - 划痕HT1080-2H-38前.czi #1	90.664	46.947	88.335	41.046	0.394679	0.375911	21.5381	21.5381	1	0	0	0	1	0	21.5381	6.34398
30	划痕HT1080-2H-38前.czi:c:2/4 - 划痕HT1080-2H-38前.czi #1	123.178	26.807	114.07	23.765	2.99408	1.24845	71.5311	71.5311	1	0	0	0	1	0	71.5311	9.60257
31	划痕HT1080-2H-38前.czi:c:2/4 - 划痕HT1080-2H-38前.czi #1	139.059	14.463	144.685	11.896	2.19166	1.14274	65.474	65.474	0	0	0	4	4	270	335.474	6.18396
32	划痕HT1080-2H-38前.czi:c:2/4 - 划痕HT1080-2H-38前.czi #1	164.511	28.524	158.825	24.189	1.31165	0.919407	52.6781	52.6781	1	0	0	0	1	0	52.6781	7.15002
33	划痕HT1080-2H-38前.czi:c:2/4 - 划痕HT1080-2H-38前.czi #1	200.3	37.785	195.451	35.066	1.78338	1.05975	60.7192	60.7192	1	0	0	0	1	0	60.7192	5.5593
34	划痕HT1080-2H-42用.czi:c:2/4 - 划痕HT1080-2H-42用.czi #1	7.314	64.341	11.584	57.254	0.602512	0.542264	31.0695	31.0695	0	0	0	4	4	270	301.069	8.27396
35	划痕HT1080-2H-42用.czi:c:2/4 - 划痕HT1080-2H-42用.czi #1	70.979	91.363	75.824	91.412	-98.8776	-1.56068	-89.4206	89.4206	0	3	0	0	3	180	269.421	4.84525
36	划痕HT1080-2H-42用.czi:c:2/4 - 划痕HT1080-2H-42用.czi #1	105.666	73.619	113.135	74.62	-7.46154	-1.43757	-82.3667	82.3667	0	3	0	0	3	180	262.367	7.53578
37	划痕HT1080-2H-42用.czi:c:2/4 - 划痕HT1080-2H-42用.czi #1	133.26	73.646	133.689	67.382	0.0684866	0.0683798	3.91787	3.91787	0	0	0	4	4	270	273.918	6.27867
38	划痕HT1080-2H-42用.czi:c:2/4 - 划痕HT1080-2H-42用.czi #1	158.119	77.74	151.777	75.182	2.47928	1.18741	68.0337	68.0337	1	0	0	0	1	0	68.0337	6.83844
39	划痕HT1080-2H-42用.czi:c:2/4 - 划痕HT1080-2H-42用.czi #1	195.491	84.665	197.19	76.901	0.21883	0.215435	12.3435	12.3435	0	0	0	4	4	270	282.343	7.94772
40	划痕HT1080-2H-45hao.czi:c:2/4 - 划痕HT1080-2H-45hao.czi #1	111.393	90.433	110.807	83.528	0.084866	0.0846632	4.85084	4.85084	1	0	0	0	1	0	4.85084	6.92982
41	划痕HT1080-2H-45hao.czi:c:2/4 - 划痕HT1080-2H-45hao.czi #1	144.68	64.093	144.316	55.963	0.0447724	0.0447426	2.56356	2.56356	1	0	0	0	1	0	2.56356	8.13814
42	划痕HT1080-2H-45hao.czi:c:2/4 - 划痕HT1080-2H-45hao.czi #1	175.922	59.644	168.787	53.62	1.18443	0.869627	49.826	49.826	1	0	0	0	1	0	49.826	9.33792
43	划痕HT1080-2H-45hao.czi:c:2/4 - 划痕HT1080-2H-45hao.czi #1	217.64	77.847	212.83	73.684	1.15542	0.857379	49.1242	49.1242	1	0	0	0	1	0	49.1242	6.36134
44	划痕HT1080-2H-03.czi:c:1/4 - 划痕HT1080-2H-03.czi #1	13.784	82.918	13.045	75.756	0.103183	0.10282	5.89113	5.89113	1	0	0	0	1	0	5.89113	7.20003	2	15	0.866667	0.867
45	划痕HT1080-2H-03.czi:c:1/4 - 划痕HT1080-2H-03.czi #1	77.906	91.958	72.613	87.356	1.15015	0.855118	48.9947	48.9947	1	0	0	0	1	0	48.9947	7.01386
46	划痕HT1080-2H-03.czi:c:1/4 - 划痕HT1080-2H-03.czi #1	124.657	59.543	120.27	55.981	1.23161	0.888815	50.9253	50.9253	1	0	0	0	1	0	50.9253	5.65098
47	划痕HT1080-2H-03.czi:c:1/4 - 划痕HT1080-2H-03.czi #1	158.557	59.054	164.167	54.882	1.34468	0.931357	53.3629	53.3629	0	0	0	4	4	270	323.363	6.99126
48	划痕HT1080-2H-03.czi:c:1/4 - 划痕HT1080-2H-03.czi #1	182.672	68.934	180.24	63.028	0.411785	0.390624	22.3811	22.3811	1	0	0	0	1	0	22.3811	6.38713
49	划痕HT1080-2H-03.czi:c:1/4 - 划痕HT1080-2H-03.czi #1	195.849	83.472	191.869	79.752	1.06989	0.819152	46.9339	46.9339	1	0	0	0	1	0	46.9339	5.44783
50	划痕HT1080-2H-23.czi:c:4/4 - 划痕HT1080-2H-23.czi #1	17.381	88.759	20.384	81.509	0.414207	0.392693	22.4997	22.4997	0	0	0	4	4	270	292.5	7.84732
51	划痕HT1080-2H-23.czi:c:4/4 - 划痕HT1080-2H-23.czi #1	47.57	80.489	50.571	70.288	0.294187	0.286115	16.3932	16.3932	0	0	0	4	4	270	286.393	10.6333
52	划痕HT1080-2H-23.czi:c:4/4 - 划痕HT1080-2H-23.czi #1	95.249	84.543	94.217	76.683	0.131298	0.130551	7.48002	7.48002	1	0	0	0	1	0	7.48002	7.92746
53	划痕HT1080-2H-23.czi:c:4/4 - 划痕HT1080-2H-23.czi #1	171.689	127.056	174.866	124.323	1.16246	0.860384	49.2964	49.2964	0	0	0	4	4	270	319.296	4.19078
54	划痕HT1080-2H-11.czi:c:1/4 - 划痕HT1080-2H-11.czi #1	47.649	38.051	45.666	31.676	0.311059	0.301571	17.2788	17.2788	1	0	0	0	1	0	17.2788	6.67629
55	划痕HT1080-2H-11.czi:c:1/4 - 划痕HT1080-2H-11.czi #1	86.573	56.204	83.796	49.816	0.434721	0.410076	23.4956	23.4956	1	0	0	0	1	0	23.4956	6.96551
56	划痕HT1080-2H-11.czi:c:1/4 - 划痕HT1080-2H-11.czi #1	116.971	57.382	123.725	62.346	-1.3606	-0.936983	-53.6852	53.6852	0	3	0	0	3	180	233.685	8.38199
57	划痕HT1080-2H-11.czi:c:1/4 - 划痕HT1080-2H-11.czi #1	164.781	71.803	158.82	68.609	1.86631	1.07891	61.8169	61.8169	1	0	0	0	1	0	61.8169	6.76278
58	划痕HT1080-2H-11.czi:c:1/4 - 划痕HT1080-2H-11.czi #1	203.665	54.078	196.178	55.604	-4.90629	-1.36973	-78.4798	78.4798	0	0	2	0	2	90	168.48	7.64093

## Sheet: CS2KO-HT1080
高尔基体Xg	Yg	细胞核Xn	Yn	Tanb	arcTanb	b-degrees	|b-degrees|	象限1	象限3	象限2	象限4	象限求和	加90度		Distance	1、4象限的个数	总个数	比例
19.539	36.979	18.016	37.56	-2.62134	-1.20635	-69.119	69.119	1	0	0	0	1	0	69.119	1.63006	9	18	0.5
49.674	42.07	51.359	39.24	0.595406	0.537035	30.7698	30.7698	0	0	0	0	0	FALSE	30.7698	3.29365
89.297	52.191	93.341	52.232	-98.6341	-1.56066	-89.4191	89.4191	0	0	0	0	0	FALSE	89.4191	4.04421
118.997	59.531	117.798	54.961	0.262363	0.25658	14.701	14.701	1	0	0	0	1	0	14.701	4.72467
136.438	65.217	130.796	70.196	-1.13316	-0.847741	-48.572	48.572	0	0	0	0	0	FALSE	48.572	7.5248
161.52	59.526	171.598	57.997	6.59124	1.42023	81.3731	81.3731	0	0	0	0	0	FALSE	81.3731	10.1933
9.806	70.204	15.342	74.978	-1.15961	-0.859173	-49.227	49.227	0	0	0	0	0	FALSE	49.227	7.31016
64.898	80.728	67.553	85.105	-0.60658	-0.545244	-31.2402	31.2402	0	0	0	0	0	FALSE	31.2402	5.11929
101.02	74.053	102.909	67.671	0.295989	0.287773	16.4882	16.4882	0	0	0	0	0	FALSE	16.4882	6.65569
127.007	88.063	118.346	84.133	2.20382	1.14482	65.5934	65.5934	1	0	0	0	1	0	65.5934	9.51093
171.92	92.5	174.555	87.888	0.571336	0.519076	29.7409	29.7409	0	0	0	0	0	FALSE	29.7409	5.31166
207.471	87.187	211.392	90.433	-1.20795	-0.879303	-50.3803	50.3803	0	0	0	0	0	FALSE	50.3803	5.09026
15.768	98.631	16.081	94.289	0.0720866	0.0719621	4.12313	4.12313	0	0	0	0	0	FALSE	4.12313	4.35327
59.666	86.119	60.204	86.278	-3.38365	-1.28344	-73.5355	73.5355	0	0	0	0	0	FALSE	73.5355	0.561004
100.778	103.555	106.849	98.119	1.11681	0.840526	48.1586	48.1586	0	0	0	0	0	FALSE	48.1586	8.14906
105.29	69.671	99.135	74.944	-1.16727	-0.862424	-49.4133	49.4133	0	0	0	0	0	FALSE	49.4133	8.10485
188.692	90.416	193.839	88.536	2.73777	1.22059	69.9347	69.9347	0	0	0	0	0	FALSE	69.9347	5.4796
217.335	60.626	218.137	69.823	-0.0872023	-0.0869823	-4.98372	4.98372	0	0	0	0	0	FALSE	4.98372	9.2319
76.335	91.642	79.981	96.728	-0.71687	-0.621959	-35.6356	35.6356	0	0	0	0	0	FALSE	35.6356	6.25785	11	23	0.478
100.755	69.468	107.047	78.687	-0.682504	-0.598887	-34.3137	34.3137	0	0	0	0	0	FALSE	34.3137	11.1615
140.61	77.569	141.388	79.45	-0.41361	-0.392184	-22.4705	22.4705	0	0	0	0	0	FALSE	22.4705	2.03555
172.792	80.346	166.541	75.932	1.41618	0.95597	54.7731	54.7731	1	0	0	0	1	0	54.7731	7.65235
200.582	41.353	201.042	44.719	-0.136661	-0.135819	-7.78188	7.78188	0	0	0	0	0	FALSE	7.78188	3.39729
28.95	72.346	36.755	75.506	-2.46994	-1.1861	-67.9585	67.9585	0	0	0	0	0	FALSE	67.9585	8.42043
58.084	71.162	64.44	74.693	-1.80006	-1.06371	-60.9462	60.9462	0	0	0	0	0	FALSE	60.9462	7.27095
108.292	85.962	103.89	85.52	9.95928	1.47072	84.2662	84.2662	1	0	0	0	1	0	84.2662	4.42413
139.583	87.176	153.479	84.999	6.3831	1.4154	81.0962	81.0962	0	0	0	0	0	FALSE	81.0962	14.0655
187.676	91.522	195.531	100.429	-0.881891	-0.722719	-41.4088	41.4088	0	0	0	0	0	FALSE	41.4088	11.8758
100.634	72.402	98.967	77.849	-0.30604	-0.296989	-17.0162	17.0162	0	0	0	0	0	FALSE	17.0162	5.69638
131.973	75.52	135.081	79.025	-0.886733	-0.725437	-41.5645	41.5645	0	0	0	0	0	FALSE	41.5645	4.68452
162.164	89.796	157.908	83.199	0.645142	0.572952	32.8278	32.8278	1	0	0	0	1	0	32.8278	7.85073
200.039	63.136	194.277	59.309	1.50562	0.984518	56.4087	56.4087	1	0	0	0	1	0	56.4087	6.91712
16.153	82.506	16.538	89.293	-0.0567261	-0.0566654	-3.24669	3.24669	0	0	0	0	0	FALSE	3.24669	6.79791
78.619	77.161	72.501	76.302	7.12224	1.4313	82.0076	82.0076	1	0	0	0	1	0	82.0076	6.17801
111.921	84.712	105.596	82.611	3.01047	1.25009	71.6249	71.6249	1	0	0	0	1	0	71.6249	6.66482
143.244	89.937	136.859	87.522	2.64389	1.2092	69.2819	69.2819	1	0	0	0	1	0	69.2819	6.82645
34.223	63.307	26.858	60.963	3.14206	1.26267	72.3457	72.3457	1	0	0	0	1	0	72.3457	7.72901
71.125	50.167	76.043	56.129	-0.824891	-0.689735	-39.5189	39.5189	0	0	0	0	0	FALSE	39.5189	7.72866
116.79	86.864	112.844	91.459	-0.85876	-0.709557	-40.6546	40.6546	0	0	0	0	0	FALSE	40.6546	6.05681
150.929	91.137	157.004	90.289	7.16392	1.4321	82.0535	82.0535	0	0	0	0	0	FALSE	82.0535	6.1339
188.392	91.924	182.834	91.578	16.0636	1.50862	86.4378	86.4378	1	0	0	0	1	0	86.4378	5.56876
10.903	69.272	13.222	74.052	-0.485146	-0.451694	-25.8802	25.8802	0	0	0	0	0	FALSE	25.8802	5.31283	12	21		0.571
73.086	76.598	64.843	72.48	2.0017	1.10749	63.4544	63.4544	1	0	0	0	1	0	63.4544	9.21439
117.509	81.138	120.44	76.483	0.629646	0.561933	32.1964	32.1964	0	0	0	0	0	FALSE	32.1964	5.50089
153.454	75.788	157.681	79.189	-1.24287	-0.893263	-51.1802	51.1802	0	0	0	0	0	FALSE	51.1802	5.42534
26.385	97.53	20.062	96.588	6.71231	1.4229	81.5264	81.5264	1	0	0	0	1	0	81.5264	6.39278
59.882	93.662	64.383	98.66	-0.90056	-0.733125	-42.0049	42.0049	0	0	0	0	0	FALSE	42.0049	6.72599
105.33	56.807	101.176	62.795	-0.693721	-0.606499	-34.7498	34.7498	0	0	0	0	0	FALSE	34.7498	7.28779
142.773	69.959	150.088	67.695	3.23101	1.27065	72.8027	72.8027	0	0	0	0	0	FALSE	72.8027	7.65734
175.722	60.078	182.978	57.542	2.8612	1.23456	70.7353	70.7353	0	0	0	0	0	FALSE	70.7353	7.68641
217.112	73.888	209.164	66.387	1.05959	0.814324	46.6573	46.6573	1	0	0	0	1	0	46.6573	10.9287
26.124	99.24	20.123	98.862	15.8757	1.50789	86.3957	86.3957	1	0	0	0	1	0	86.3957	6.01289
60.639	95.502	64.795	100.281	-0.869638	-0.715785	-41.0115	41.0115	0	0	0	0	0	FALSE	41.0115	6.33334
106.105	58.927	101.546	64.588	-0.805335	-0.677985	-38.8457	38.8457	0	0	0	0	0	FALSE	38.8457	7.26852
143.326	71.724	150.493	69.685	3.51496	1.29362	74.119	74.119	0	0	0	0	0	FALSE	74.119	7.4514
176.604	62.239	183.223	59.409	2.33887	1.16676	66.8505	66.8505	0	0	0	0	0	FALSE	66.8505	7.19862
217.431	75.948	209.619	67.941	0.975646	0.773072	44.2938	44.2938	1	0	0	0	1	0	44.2938	11.1866
28.897	76.697	32.828	78.063	-2.87775	-1.23636	-70.838	70.838	0	0	0	0	0	FALSE	70.838	4.16158
89.411	68.008	80.48	66.643	6.54286	1.41913	81.3102	81.3102	1	0	0	0	1	0	81.3102	9.03471
115.485	73.3	120.941	78.657	-1.01848	-0.794554	-45.5246	45.5246	0	0	0	0	0	FALSE	45.5246	7.64627
161.764	60.473	158.482	60.479	-547	-1.56897	-89.8953	89.8953	0	0	0	0	0	FALSE	89.8953	3.28201
201.782	50.067	201.394	47.523	0.152516	0.151349	8.67168	8.67168	1	0	0	0	1	0	8.67168	2.57342
