# Supplementary material for: MARK2 regulates Golgi apparatus reorientation by phosphorylation of CAMSAP2 in directional cell migratio
Source: eLife journal article supplement (doi:10.7554/elife.105977), 2025-03-26
Supplement: fig1-figsupp1-data3 [file Figure 1-figure supplement 1J source data 1.xlsx]

## Sheet: Sheet1
HT1080	CAMSAP2 KO
67.7	44.2
78.2	36.9
80.2	43
