# Supplementary material for: MARK2 regulates Golgi apparatus reorientation by phosphorylation of CAMSAP2 in directional cell migratio
Source: eLife journal article supplement (doi:10.7554/elife.105977), 2025-03-26
Supplement: fig2-data3 [file elife-105977-fig2-data3-v1.zip]

## Sheet: ht1080
	HT1080-2质心	Xg	Yg	Xn	Yn	Tanb	arcTanb	b-degrees	|b-degrees|	象限1	象限3	象限2	象限4	象限求和	加90度	360角度	Distance	1、4象限的个数	总个数	比例
1	划痕HT1080-2H-22hao.czi:c:2/4 - 划痕HT1080-2H-22hao.czi #1	4.647	106.342	13.958	102.333	2.32252	1.16422	66.7049	66.7049	0	0	0	4	4	270	336.705	10.1374	11	12	0.916667	0.912
2	划痕HT1080-2H-22hao.czi:c:2/4 - 划痕HT1080-2H-22hao.czi #1	55.578	76.366	59.299	70.792	0.667564	0.588623	33.7256	33.7256	0	0	0	4	4	270	303.726	6.70189
3	划痕HT1080-2H-22hao.czi:c:2/4 - 划痕HT1080-2H-22hao.czi #1	96.331	80.646	88.629	80.145	15.3733	1.50584	86.2783	86.2783	1	0	0	0	1	0	86.2783	7.71828
4	划痕HT1080-2H-22hao.czi:c:2/4 - 划痕HT1080-2H-22hao.czi #1	126.263	78.652	123.728	73.718	0.513782	0.474612	27.1933	27.1933	1	0	0	0	1	0	27.1933	5.54712
5	划痕HT1080-2H-22hao.czi:c:2/4 - 划痕HT1080-2H-22hao.czi #1	157.025	62.655	164.859	56.467	1.266	0.90225	51.6951	51.6951	0	0	0	4	4	270	321.695	9.98313
6	划痕HT1080-2H-22hao.czi:c:2/4 - 划痕HT1080-2H-22hao.czi #1	188.277	58.597	193.601	53.588	1.06289	0.815874	46.7461	46.7461	0	0	0	4	4	270	316.746	7.30993
7	划痕HT1080-2H-16.czi:c:1/4 - 划痕HT1080-2H-16.czi #1	136.162	87.633	128.451	87.754	-63.7273	-1.55511	-89.101	89.101	0	0	2	0	2	90	179.101	7.71195
8	划痕HT1080-2H-05hao.czi:c:2/4 - 划痕HT1080-2H-05hao.czi #1	34.753	53.434	36.487	49.719	0.466756	0.436701	25.0211	25.0211	0	0	0	4	4	270	295.021	4.09975
9	划痕HT1080-2H-05hao.czi:c:2/4 - 划痕HT1080-2H-05hao.czi #1	73.474	60.83	72.307	54.659	0.18911	0.186903	10.7088	10.7088	1	0	0	0	1	0	10.7088	6.28038
10	划痕HT1080-2H-05hao.czi:c:2/4 - 划痕HT1080-2H-05hao.czi #1	99.826	56.559	93.607	55.698	7.223	1.43322	82.1177	82.1177	1	0	0	0	1	0	82.1177	6.27832
11	划痕HT1080-2H-05hao.czi:c:2/4 - 划痕HT1080-2H-05hao.czi #1	142.641	69.892	137.293	61.354	0.626376	0.559588	32.062	32.062	1	0	0	0	1	0	32.062	10.0746
12	划痕HT1080-2H-05hao.czi:c:2/4 - 划痕HT1080-2H-05hao.czi #1	160.969	103.826	164.899	96.147	0.511785	0.473031	27.1027	27.1027	0	0	0	4	4	270	297.103	8.62624
13	划痕HT1080-2H-26用.czi:c:2/4 - 划痕HT1080-2H-26用.czi #1	24.251	65.668	28.61	59.515	0.708435	0.616365	35.3151	35.3151	0	0	0	4	4	270	305.315	7.54058	17	18	0.944444	0.944
14	划痕HT1080-2H-26用.czi:c:2/4 - 划痕HT1080-2H-26用.czi #1	53.706	77.034	48.914	72.316	1.01568	0.793179	45.4458	45.4458	1	0	0	0	1	0	45.4458	6.72479
15	划痕HT1080-2H-26用.czi:c:2/4 - 划痕HT1080-2H-26用.czi #1	88.565	75.388	80.757	73.049	3.33818	1.27974	73.3236	73.3236	1	0	0	0	1	0	73.3236	8.15081
16	划痕HT1080-2H-26用.czi:c:2/4 - 划痕HT1080-2H-26用.czi #1	124.226	71.102	133.377	69.129	4.63811	1.35844	77.833	77.833	0	0	0	4	4	270	347.833	9.36128
17	划痕HT1080-2H-26用.czi:c:2/4 - 划痕HT1080-2H-26用.czi #1	159.652	69.433	155.689	64.148	0.749858	0.64341	36.8647	36.8647	1	0	0	0	1	0	36.8647	6.6058
18	划痕HT1080-2H-26用.czi:c:2/4 - 划痕HT1080-2H-26用.czi #1	184.187	74.553	177.302	70.604	1.74348	1.05004	60.1629	60.1629	1	0	0	0	1	0	60.1629	7.93712
19	划痕HT1080-2H-36用.czi:c:2/4 - 划痕HT1080-2H-36用.czi #1	41.62	75.998	48.674	75.138	8.20233	1.44948	83.049	83.049	0	0	0	4	4	270	353.049	7.10623
20	划痕HT1080-2H-36用.czi:c:2/4 - 划痕HT1080-2H-36用.czi #1	91.984	94.713	87.628	90.64	1.06948	0.81896	46.923	46.923	1	0	0	0	1	0	46.923	5.96356
21	划痕HT1080-2H-36用.czi:c:2/4 - 划痕HT1080-2H-36用.czi #1	119.76	78.564	115.055	78.141	11.1229	1.48113	84.8627	84.8627	1	0	0	0	1	0	84.8627	4.72398
22	划痕HT1080-2H-36用.czi:c:2/4 - 划痕HT1080-2H-36用.czi #1	175.652	71.331	177.367	64.143	0.238592	0.234213	13.4194	13.4194	0	0	0	4	4	270	283.419	7.38976
23	划痕HT1080-2H-36用.czi:c:2/4 - 划痕HT1080-2H-36用.czi #1	204.007	51.573	206.991	45.951	0.530772	0.487961	27.9581	27.9581	0	0	0	4	4	270	297.958	6.36484
24	划痕HT1080-2H-39用.czi:c:2/4 - 划痕HT1080-2H-39用.czi #1	45.484	95.827	38.497	95.551	25.3152	1.53131	87.7379	87.7379	1	0	0	0	1	0	87.7379	6.99245
25	划痕HT1080-2H-39用.czi:c:2/4 - 划痕HT1080-2H-39用.czi #1	87.841	102.488	84.747	96.982	0.561932	0.511958	29.333	29.333	1	0	0	0	1	0	29.333	6.31576
26	划痕HT1080-2H-39用.czi:c:2/4 - 划痕HT1080-2H-39用.czi #1	119.666	82.386	110.86	79.43	2.97903	1.24694	71.4441	71.4441	1	0	0	0	1	0	71.4441	9.2889
27	划痕HT1080-2H-39用.czi:c:2/4 - 划痕HT1080-2H-39用.czi #1	135.138	70.715	141.305	67.841	2.14579	1.13469	65.0131	65.0131	0	0	0	4	4	270	335.013	6.80381
28	划痕HT1080-2H-39用.czi:c:2/4 - 划痕HT1080-2H-39用.czi #1	160.537	84.392	155.114	79.649	1.14337	0.852188	48.8268	48.8268	1	0	0	0	1	0	48.8268	7.20451
29	划痕HT1080-2H-39用.czi:c:2/4 - 划痕HT1080-2H-39用.czi #1	180.361	79.401	177.205	84.477	-0.621749	-0.556258	-31.8713	31.8713	0	0	2	0	2	90	121.871	5.97713
30	划痕HT1080-2H-39用.czi:c:2/4 - 划痕HT1080-2H-39用.czi #1	196.766	93.575	191.534	91.638	2.70108	1.21622	69.6844	69.6844	1	0	0	0	1	0	69.6844	5.57905
31	划痕HT1080-2H-43用.czi:c:2/4 - 划痕HT1080-2H-43用.czi #1	41.153	83.246	45.667	77.931	0.849294	0.704084	40.3411	40.3411	0	0	0	4	4	270	310.341	6.97319	8	9	0.888889	0.889
32	划痕HT1080-2H-43用.czi:c:2/4 - 划痕HT1080-2H-43用.czi #1	92.959	80.763	98.474	76.667	1.34644	0.931983	53.3987	53.3987	0	0	0	4	4	270	323.399	6.86968
33	划痕HT1080-2H-43用.czi:c:2/4 - 划痕HT1080-2H-43用.czi #1	125.216	95.691	120.378	92.565	1.54766	0.997143	57.1321	57.1321	1	0	0	0	1	0	57.1321	5.76005
34	划痕HT1080-2H-43用.czi:c:2/4 - 划痕HT1080-2H-43用.czi #1	134.338	89.061	137.214	82.76	0.456435	0.428193	24.5336	24.5336	0	0	0	4	4	270	294.534	6.92632
35	划痕HT1080-2H-43用.czi:c:2/4 - 划痕HT1080-2H-43用.czi #1	176.068	69.538	175.693	59.958	0.0391441	0.0391241	2.24164	2.24164	1	0	0	0	1	0	2.24164	9.58734
36	划痕HT1080-2H-16.czi:c:1/4 - 划痕HT1080-2H-16.czi #1	31.424	75.226	33.777	69.089	0.383412	0.366125	20.9774	20.9774	0	0	0	4	4	270	290.977	6.57262
37	划痕HT1080-2H-16.czi:c:1/4 - 划痕HT1080-2H-16.czi #1	76.37	96.422	73.061	94.096	1.42261	0.958106	54.8954	54.8954	1	0	0	0	1	0	54.8954	4.04472
38	划痕HT1080-2H-16.czi:c:1/4 - 划痕HT1080-2H-16.czi #1	150.793	91.753	156.717	93.813	-2.87573	-1.23614	-70.8255	70.8255	0	3	0	0	3	180	250.825	6.27195
39	划痕HT1080-2H-16.czi:c:1/4 - 划痕HT1080-2H-16.czi #1	182.586	91.631	189.772	90.041	4.5195	1.35304	77.5235	77.5235	0	0	0	4	4	270	347.524	7.3598

## Sheet: MARK2 KO HT1080
	MARK2KO-质心坐标	Xg	Yg	Xn	Yn	Tanb	arcTanb	b-degrees	|b-degrees|	象限1	象限3	象限2	象限4	象限求和	加90度	360角度	Distance	1、4象限的个数	总个数	比例
1	划痕mark2KOHT1080-2H-14hao.czi:c:2/4 - 划痕mark2KOHT1080-2H-14hao.czi #1	18.086	80.752	18.825	70.272	0.0705153	0.0703987	4.03355	4.03355	0	0	0	4	4	270	274.034	10.506	6	12		0.5
2	划痕mark2KOHT1080-2H-14hao.czi:c:2/4 - 划痕mark2KOHT1080-2H-14hao.czi #1	60.362	51.67	51.203	50.091	5.80051	1.40008	80.2184	80.2184	1	0	0	0	1	0	80.2184	9.29411
3	划痕mark2KOHT1080-2H-14hao.czi:c:2/4 - 划痕mark2KOHT1080-2H-14hao.czi #1	93.976	67.746	91.8	64.199	0.613476	0.55027	31.5281	31.5281	1	0	0	0	1	0	31.5281	4.16127
4	划痕mark2KOHT1080-2H-14hao.czi:c:2/4 - 划痕mark2KOHT1080-2H-14hao.czi #1	116.874	81.625	119.907	82.822	-2.53383	-1.1949	-68.4629	68.4629	0	3	0	0	3	180	248.463	3.26066
5	划痕mark2KOHT1080-2H-14hao.czi:c:2/4 - 划痕mark2KOHT1080-2H-14hao.czi #1	156.193	99.601	171.739	97.998	9.69807	1.46805	84.1128	84.1128	0	0	0	4	4	270	354.113	15.6284
6	划痕mark2KOHT1080-2H-14hao.czi:c:2/4 - 划痕mark2KOHT1080-2H-14hao.czi #1	190.139	98.039	199.475	101.378	-2.79605	-1.22732	-70.3205	70.3205	0	3	0	0	3	180	250.321	9.91513
13	划痕mark2KOHT1080-2H-18haohaohao.czi:c:2/4 - 划痕mark2KOHT1080-2H-18haohaohao.czi #1	13.136	48.318	9.45	35.52	0.288014	0.280424	16.0671	16.0671	1	0	0	0	1	0	16.0671	13.3182
14	划痕mark2KOHT1080-2H-18haohaohao.czi:c:2/4 - 划痕mark2KOHT1080-2H-18haohaohao.czi #1	43.938	38.543	51.52	30.465	0.938599	0.753736	43.1859	43.1859	0	0	0	4	4	270	313.186	11.0788
15	划痕mark2KOHT1080-2H-18haohaohao.czi:c:2/4 - 划痕mark2KOHT1080-2H-18haohaohao.czi #1	87.15	63.137	81.376	71.715	-0.673117	-0.592455	-33.9452	33.9452	0	0	2	0	2	90	123.945	10.3403
16	划痕mark2KOHT1080-2H-18haohaohao.czi:c:2/4 - 划痕mark2KOHT1080-2H-18haohaohao.czi #1	148.693	56.403	143.086	61.279	-1.14992	-0.855017	-48.9889	48.9889	0	0	2	0	2	90	138.989	7.4306
17	划痕mark2KOHT1080-2H-18haohaohao.czi:c:2/4 - 划痕mark2KOHT1080-2H-18haohaohao.czi #1	183.017	47.574	175.124	48.98	-5.6138	-1.39451	-79.8997	79.8997	0	0	2	0	2	90	169.9	8.01725
18	划痕mark2KOHT1080-2H-18haohaohao.czi:c:2/4 - 划痕mark2KOHT1080-2H-18haohaohao.czi #1	206.833	41.156	207.373	45.185	-0.134028	-0.133234	-7.63376	7.63376	0	3	0	0	3	180	187.634	4.06503
25	划痕mark2KOHT1080-2H-21haohaohao.czi:c:2/4 - 划痕mark2KOHT1080-2H-21haohaohao.czi #1	18.947	42.852	13.436	34.508	0.660475	0.583704	33.4437	33.4437	1	0	0	0	1	0	33.4437	9.99967	10	17	0.588235	0.588
26	划痕mark2KOHT1080-2H-21haohaohao.czi:c:2/4 - 划痕mark2KOHT1080-2H-21haohaohao.czi #1	66.1	39.087	66.504	39.842	-0.535099	-0.491331	-28.1512	28.1512	0	3	0	0	3	180	208.151	0.856295
27	划痕mark2KOHT1080-2H-21haohaohao.czi:c:2/4 - 划痕mark2KOHT1080-2H-21haohaohao.czi #1	128.318	44.549	135.187	46.849	-2.98652	-1.24769	-71.4875	71.4875	0	3	0	0	3	180	251.488	7.24384
28	划痕mark2KOHT1080-2H-21haohaohao.czi:c:2/4 - 划痕mark2KOHT1080-2H-21haohaohao.czi #1	178.617	41.977	173.05	42.462	-11.4784	-1.4839	-85.0209	85.0209	0	0	2	0	2	90	175.021	5.58809
33	划痕mark2KOHT1080-2H-22hao.czi:c:2/4 - 划痕mark2KOHT1080-2H-22hao.czi #1	8.232	55.079	15.022	56.533	-4.66988	-1.35984	-77.9133	77.9133	0	3	0	0	3	180	257.913	6.94393
34	划痕mark2KOHT1080-2H-22hao.czi:c:2/4 - 划痕mark2KOHT1080-2H-22hao.czi #1	125.929	81.054	125.965	76.194	0.00740741	0.00740727	0.424405	0.424405	0	0	0	4	4	270	270.424	4.86013
37	划痕mark2KOHT1080-2H-23hao.czi:c:2/4 - 划痕mark2KOHT1080-2H-23hao.czi #1	70.061	59.21	67.33	54.106	0.535071	0.491309	28.1499	28.1499	1	0	0	0	1	0	28.1499	5.78871
38	划痕mark2KOHT1080-2H-23hao.czi:c:2/4 - 划痕mark2KOHT1080-2H-23hao.czi #1	129.206	38.284	130.337	29.898	0.134868	0.134059	7.681	7.681	0	0	0	4	4	270	277.681	8.46192
39	划痕mark2KOHT1080-2H-23hao.czi:c:2/4 - 划痕mark2KOHT1080-2H-23hao.czi #1	162.747	65.286	163.065	65.581	-1.07797	-0.822901	-47.1488	47.1488	0	3	0	0	3	180	227.149	0.433761
40	划痕mark2KOHT1080-2H-23hao.czi:c:2/4 - 划痕mark2KOHT1080-2H-23hao.czi #1	192.808	92.147	203.607	89.05	3.48692	1.29151	73.9979	73.9979	0	0	0	4	4	270	343.998	11.2343
45	划痕mark2KOHT1080-2H-27hao.czi:c:2/4 - 划痕mark2KOHT1080-2H-27hao.czi #1	49.999	90.076	54.832	98.482	-0.574946	-0.521794	-29.8966	29.8966	0	3	0	0	3	180	209.897	9.69633
46	划痕mark2KOHT1080-2H-27hao.czi:c:2/4 - 划痕mark2KOHT1080-2H-27hao.czi #1	94.346	68.017	95.68	61.891	0.21776	0.214413	12.285	12.285	0	0	0	4	4	270	282.285	6.26956
47	划痕mark2KOHT1080-2H-27hao.czi:c:2/4 - 划痕mark2KOHT1080-2H-27hao.czi #1	150.169	25.29	162.981	37.447	-1.05388	-0.811625	-46.5027	46.5027	0	3	0	0	3	180	226.503	17.6618
48	划痕mark2KOHT1080-2H-27hao.czi:c:2/4 - 划痕mark2KOHT1080-2H-27hao.czi #1	202.336	85.267	195.02	76.894	0.873761	0.718128	41.1457	41.1457	1	0	0	0	1	0	41.1457	11.1189
53	划痕mark2KOHT1080-2H-29hao.czi:c:2/4 - 划痕mark2KOHT1080-2H-29hao.czi #1	40.969	30.712	37.185	20.696	0.377796	0.361219	20.6963	20.6963	1	0	0	0	1	0	20.6963	10.707
54	划痕mark2KOHT1080-2H-29hao.czi:c:2/4 - 划痕mark2KOHT1080-2H-29hao.czi #1	80.427	50.892	94.064	49.507	9.84621	1.46958	84.2008	84.2008	0	0	0	4	4	270	354.201	13.7072
55	划痕mark2KOHT1080-2H-29hao.czi:c:2/4 - 划痕mark2KOHT1080-2H-29hao.czi #1	178.055	97.626	183.133	91.991	0.901154	0.733452	42.0237	42.0237	0	0	0	4	4	270	312.024	7.58547
59	划痕mark2KOHT1080-2H-30hao.czi:c:2/4 - 划痕mark2KOHT1080-2H-30hao.czi #1	48.313	79.535	50.775	69.385	0.242562	0.237966	13.6344	13.6344	0	0	0	4	4	270	283.634	10.4443	6	15	0.4	0.4
60	划痕mark2KOHT1080-2H-30hao.czi:c:2/4 - 划痕mark2KOHT1080-2H-30hao.czi #1	86.91	14.853	88.105	27.859	-0.0918807	-0.0916234	-5.24964	5.24964	0	3	0	0	3	180	185.25	13.0608
61	划痕mark2KOHT1080-2H-30hao.czi:c:2/4 - 划痕mark2KOHT1080-2H-30hao.czi #1	116.509	33.312	109.351	36.08	-2.58598	-1.20181	-68.8585	68.8585	0	0	2	0	2	90	158.859	7.67455
62	划痕mark2KOHT1080-2H-30hao.czi:c:2/4 - 划痕mark2KOHT1080-2H-30hao.czi #1	157.68	32.931	158.79	31.848	1.02493	0.797709	45.7054	45.7054	0	0	0	4	4	270	315.705	1.5508
63	划痕mark2KOHT1080-2H-30hao.czi:c:2/4 - 划痕mark2KOHT1080-2H-30hao.czi #1	175.647	99.867	183.749	93.961	1.37183	0.9409	53.9096	53.9096	0	0	0	4	4	270	323.91	10.0261
69	划痕mark2KOHT1080-2H-33反.czi:c:2/4 - 划痕mark2KOHT1080-2H-33反.czi #1	81.111	40.719	76.216	48.478	-0.63088	-0.562817	-32.247	32.247	0	0	2	0	2	90	122.247	9.17405
70	划痕mark2KOHT1080-2H-33反.czi:c:2/4 - 划痕mark2KOHT1080-2H-33反.czi #1	119.232	56.725	115.284	58.029	-3.02761	-1.25178	-71.7219	71.7219	0	0	2	0	2	90	161.722	4.15778
71	划痕mark2KOHT1080-2H-33反.czi:c:2/4 - 划痕mark2KOHT1080-2H-33反.czi #1	141.308	55.097	146.464	63.293	-0.629087	-0.561533	-32.1735	32.1735	0	3	0	0	3	180	212.173	9.68291
75	划痕mark2KOHT1080-2H-36haohaohao用.czi:c:2/4 - 划痕mark2KOHT1080-2H-36haohaohao用.czi #1	32.606	33.381	28.884	26.08	0.509793	0.471451	27.0122	27.0122	1	0	0	0	1	0	27.0122	8.19499
76	划痕mark2KOHT1080-2H-36haohaohao用.czi:c:2/4 - 划痕mark2KOHT1080-2H-36haohaohao用.czi #1	52.559	31.539	55.541	38.929	-0.403518	-0.383536	-21.975	21.975	0	3	0	0	3	180	201.975	7.96897
77	划痕mark2KOHT1080-2H-36haohaohao用.czi:c:2/4 - 划痕mark2KOHT1080-2H-36haohaohao用.czi #1	138.12	51.972	145.71	54.751	-2.7312	-1.21982	-69.8903	69.8903	0	3	0	0	3	180	249.89	8.08276
78	划痕mark2KOHT1080-2H-36haohaohao用.czi:c:2/4 - 划痕mark2KOHT1080-2H-36haohaohao用.czi #1	167.457	43.917	167.675	52.491	-0.0254257	-0.0254202	-1.45647	1.45647	0	3	0	0	3	180	181.456	8.57677
83	划痕mark2KOHT1080-2H-37yomhyomhhaohaohaohao.czi:c:2/4 - 划痕mark2KOHT1080-2H-37yomhyomhhaohaohaohao.czi #1	27.025	78.321	12.309	74.935	4.34613	1.34464	77.0424	77.0424	1	0	0	0	1	0	77.0424	15.1005
84	划痕mark2KOHT1080-2H-37yomhyomhhaohaohaohao.czi:c:2/4 - 划痕mark2KOHT1080-2H-37yomhyomhhaohaohaohao.czi #1	108.761	66.862	98.502	66.774	116.58	1.56222	89.5085	89.5085	1	0	0	0	1	0	89.5085	10.2594
85	划痕mark2KOHT1080-2H-37yomhyomhhaohaohaohao.czi:c:2/4 - 划痕mark2KOHT1080-2H-37yomhyomhhaohaohaohao.czi #1	161.546	65.931	164.126	69.526	-0.717663	-0.622483	-35.6656	35.6656	0	3	0	0	3	180	215.666	4.42498
