# Supplementary material for: MARK2 regulates Golgi apparatus reorientation by phosphorylation of CAMSAP2 in directional cell migratio
Source: eLife journal article supplement (doi:10.7554/elife.105977), 2025-03-26
Supplement: fig2-data3 [file Figure2F source data 1.xlsx]

## Sheet: Sheet1
HT1080	MARK2 KO
91.2	50
94.4	58.8
88.9	40
