# Supplementary material for: MARK2 regulates Golgi apparatus reorientation by phosphorylation of CAMSAP2 in directional cell migratio
Source: eLife journal article supplement (doi:10.7554/elife.105977), 2025-03-26
Supplement: fig2-figsupp1-data1 [file elife-105977-fig2-figsupp1-data1-v1.zip]

|                   |     |   |   |   |   |
|-------------------|-----|---|---|---|---|
|                   | GFP | + | - | - | - |
| GFP-CAMSAP2 CKK   | -   | + | - | - | - |
| GFP-CAMSAP2 1222F | -   | - | + | - | - |
| GFP-CAMSAP2 1149F | -   | - | - | + | + |

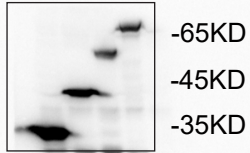

Input

|                   |     |   |   |   |   |
|-------------------|-----|---|---|---|---|
|                   | GFP | + | - | - | - |
| GFP-CAMSAP2 CKK   | -   | + | - | - | - |
| GFP-CAMSAP2 1222F | -   | - | + | - | - |
| GFP-CAMSAP2 1149F | -   | - | - | + | + |

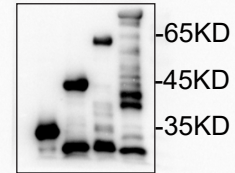

IP-GFP

|             |  |  |  |  |  |
|-------------|--|--|--|--|--|
| Flag-MARK2- |  |  |  |  |  |
|-------------|--|--|--|--|--|

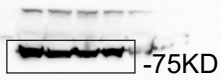

Input

|             |  |  |  |  |  |
|-------------|--|--|--|--|--|
| Flag-MARK2- |  |  |  |  |  |
|-------------|--|--|--|--|--|

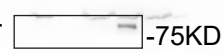

IP-GFP
