# Supplementary material for: MARK2 regulates Golgi apparatus reorientation by phosphorylation of CAMSAP2 in directional cell migratio
Source: eLife journal article supplement (doi:10.7554/elife.105977), 2025-03-26
Supplement: fig2-figsupp1-data3 [file elife-105977-fig2-figsupp1-data3-v1.zip]

## Sheet: Sheet1
RPE1	SiMARK2-1
68.004	172.796
45.794	90.795
32.51	103.736
41.938	73.048
61.798	61.138
28.839	81.763
52.739	94.862
77.379	99.642
167.488	113.164
19.173	65.231
124.15	83.163
57.071	101.016
60.979	160.886
29.446	112.134
59.896	141.343
174.486	43.998
194.056	83.77
39.561	89.29
39.165	124.916
28.865	26.647
74.976	68.691
97.688	207.551
45.134	73.497
24.93	61.454
31.533	307.853
68.876	162.259
124.626	437.55
46.903	67.212
91.218	112.794
24.032	42.862
34.094	38.135
73.392	109.361
32.246	90.373
52.053	167.488
29.42	143.218
127.504	121.06
54.747	113.032
75.293	69.932
73.497	216.372
80.68	175.094
44.764	83.506
80.337	83.691
71.728	62.273
161.968	128.085
147.126	97.847
39.456	40.274
80.232	25.67
85.276	35.072
45.503	37.184
44.183	78.832
41.357
38.954	222.34
89.633	75.557
160.199	136.88
56.886	86.464
75.742	86.834
47.537	95.839
108.542
79.202
118.604
61.983
50.178
109.255
59.051
74.289
67.687
250.202
51.63
66.499
103.577
43.364
89.58
73.444
94.123
212.463
72.678
148.341
102.838
37.052
26.357
92.591
358.137
92.274
30.899
50.812
60.662
31.559
45.16
157.32
49.465
61.296
45.952
50.204
