# Supplementary material for: MARK2 regulates Golgi apparatus reorientation by phosphorylation of CAMSAP2 in directional cell migratio
Source: eLife journal article supplement (doi:10.7554/elife.105977), 2025-03-26
Supplement: fig2-figsupp1-data3 [file Figure 2-figure supplement 1D source data 3.xlsx]

## Sheet: Sheet1
GFP	GFP-MARK2
119.37	59.421
75.293	60.002
34.174	56.173
27.149	74.131
78.383	89.131
97.741	63.092
102.257	55.433
348.497	59.157
253.582	84.087
287.756	90.98
302.783	35.705
258.389	92.116
344.642	56.806
109.071	67.08
144.248	67.766
130.805	66.314
50.891	45.556
71.49	31.084
48.54	42.783
62.22	28.152
149.054	101.333
213.387	128.93
314.799	132.179
49.491	102.389
0.026	70.407
153.781	77.432
245.844	114.247
106.535	108.093
200.843
92.406
80.073
109.493
72.045
