# Supplementary material for: MARK2 regulates Golgi apparatus reorientation by phosphorylation of CAMSAP2 in directional cell migratio
Source: eLife journal article supplement (doi:10.7554/elife.105977), 2025-03-26
Supplement: fig2-figsupp1-data3 [file Figure 2-figure supplement 1I source data 3.xlsx]

## Sheet: Sheet1
RPE1	siMARK2-2
0.784	0.778
0.845	0.777
0.719	0.719
0.751	0.741
0.743	0.76
0.859	0.8
0.781	0.815
0.766	0.788
0.779	0.751
0.815	0.723
0.82	0.817
0.773	0.777
0.807	0.703
0.816	0.779
0.787	0.813
0.842	0.63
0.798	0.569
0.801	0.664
0.785	0.8
0.794	0.635
0.639	0.551
0.749	0.534
0.686	0.613
0.792	0.522
0.647	0.604
0.718	0.625
0.635	0.711
0.723	0.651
0.718
0.777
