# Supplementary material for: MARK2 regulates Golgi apparatus reorientation by phosphorylation of CAMSAP2 in directional cell migratio
Source: eLife journal article supplement (doi:10.7554/elife.105977), 2025-03-26
Supplement: fig3-data3 [file elife-105977-fig3-data3-v1.zip]

## Sheet: Sheet1
HT1080	MARK2 KO
50.178	578.523
48.382	559.878
39.931	544.798
60.953	540.308
60.292	536.585
33.645	532.861
55.697	506.953
19.147	434.803
66.208	423.447
37.633	394.925
23.346	388.508
20.52	383.675
23.029	373.111
29.843	365.822
44.658	365.003
35.151	325.099
39.931	316.331
20.599	313.479
55.169	307.748
17.166	300.406
27.043	288.522
23.161	276.347
24.429	265.519
14.921	265.387
14.921	263.433
55.354	259.736
56.437	256.302
85.012	246.901
20.018	246.478
35.23	238.925
36.075	235.043
28.575	234.409
13.02	232.059
27.651	227.331
31.612	226.803
29.895	224.955
35.415	221.706
20.045	210.35
16.347	206.283
25.96	200.684
21.022	199.39
19.516	193.475
41.568	193.105
32.404	189.196
30.107	183.36
10.062	182.779
21.55	181.247
16.057	171.608
14.604	170.05
54.799	168.676
32.219	166.326
35.019	163.896
30.107	163.764
11.039	161.493
35.124	160.674
4.305	158.72
33.91	156.105
17.589	151.008
14.868	146.387
24.191	137.725
44.209	136.906
46.665	131.941
19.939	130.779
27.598	127.953
26.145	126.184
29.209	123.754
50.415	116.993
27.07	112.372
32.642	106.509
52.845	101.623
78.568	99.59
22.105	98.48
47.299	97.371
65.416	88.603
63.435	86.094
39.403
68.374
44.077
30.476
76.032
49.042
31.348
10.59
33.064
49.914
71.86
47.88
40.037
61.851
60.583
27.967
21.497
22.659
19.226
33.434
40.934
28.469
23.214
38.69
33.83
42.545
24.746
16.981
