# Supplementary material for: MARK2 regulates Golgi apparatus reorientation by phosphorylation of CAMSAP2 in directional cell migratio
Source: eLife journal article supplement (doi:10.7554/elife.105977), 2025-03-26
Supplement: fig3-data3 [file Figure3E source data 1.xlsx]

## Sheet: Sheet1
HT1080	MARK2 KO
0.681094	0.643785
0.487415	0.689605
0.639464	0.418937
0.561724	0.388206
