# Supplementary material for: MARK2 regulates Golgi apparatus reorientation by phosphorylation of CAMSAP2 in directional cell migratio
Source: eLife journal article supplement (doi:10.7554/elife.105977), 2025-03-26
Supplement: fig3-data3 [file Figure3F source data 1.xlsx]

## Sheet: Sheet1
HT1080	MARK2 KO
0.604934	0.625447
0.574387	0.697163
0.520511	0.843973
