# Supplementary material for: MARK2 regulates Golgi apparatus reorientation by phosphorylation of CAMSAP2 in directional cell migratio
Source: eLife journal article supplement (doi:10.7554/elife.105977), 2025-03-26
Supplement: fig3-data3 [file Figure3I source data 1.xlsx]

## Sheet: Sheet1
Control	siMARK2-2
1.42287	1.14987
1.71425	0.92767
1.75937	1.02543
