# Supplementary material for: MARK2 regulates Golgi apparatus reorientation by phosphorylation of CAMSAP2 in directional cell migratio
Source: eLife journal article supplement (doi:10.7554/elife.105977), 2025-03-26
Supplement: fig4-data3 [file elife-105977-fig4-data3-v1.zip]

## Sheet: Sheet1
HT1080	CAMSAP2 KO	HA-CAMSAP2	HA-CAMSAP2A	HA-CAMSAP2D
50.178	146.862	74.263	105.215	95.892
48.382	142.901	115.805	60.557	24.587
39.931	141.633	133.605	47.167	106.984
60.953	140.366	49.544	97.609	73.814
60.292	139.019	42.545	208.951	52.079
33.645	138.042	28.258	232.745	140.445
55.697	137.857	30.846	104.581	57.335
19.147	136.431	17.404	147.655	49.623
66.208	136.299	150.507	52.739	86.913
37.633	135.744	85.012	161.625	55.433
23.346	133.42	74.21	32.748	64.307
20.52	130.7	61.534	39.931	16.506
23.029	128.429	85.064	142.848	120.268
29.843	127.214	161.255	53.875	39.772
44.658	124.784	69.351	112.108	34.385
35.151	123.516	62.564	84.827	48.936
39.931	123.358	142.874	121.14	89.211
20.599	121.06	53.188	88.841	90.848
55.169	119.74	110.576	130.515	51.762
17.166	119.344	95.47	80.02	39.139
27.043	115.567	52.766	146.228	86.438
23.161	115.435	55.671	103.128	22.21
24.429	112.662	35.441	75.346	73.048
14.921	111.896	51.419	74.316	50.257
14.921	111.87	43.206	48.091	51.393
55.354	109.81	78.277	56.041	68.743
56.437	107.38	59.368	147.338	55.195
85.012	106.456	36.075	68.321	47.695
20.018	105.822	60.9	50.389	24.561
35.23	104.66	92.406	69.985	19.384
36.075	104.37	60.398	85.038	49.834
28.575	102.679	28.047	60.873	52.713
13.02	100.778	36.735	28.628	24.349
27.651	93.093	72.256	63.594	66.446
31.612	92.776	63.646	42.466	65.442
29.895	89.818	39.693	66.763
35.415	88.577	84.721	52.792
20.045	88.075	103.973	220.861
16.347	87.917	72.943	128.376
	86.121	301.04	41.7
	86.094	66.525	113.349
	82.582	45.266	57.176
	78.753	85.593	135.348
	72.15	51.128	70.962
	71.965	72.177	84.034
	494.805	47.009	127.848
	365.399	46.982	61.111
	360.831	46.929	107.565
	293.434	32.959	50.389
	269.269	111.262
