# Supplementary material for: MARK2 regulates Golgi apparatus reorientation by phosphorylation of CAMSAP2 in directional cell migratio
Source: eLife journal article supplement (doi:10.7554/elife.105977), 2025-03-26
Supplement: fig4-data3 [file Figure4F source data 1.xlsx]

## Sheet: Sheet1
HA-CAMSAP2	HA-CAMSAP2A	HA-CAMSAP2D
0.065	0.067	0.09
0.046	0.076	0.065
0.014	0.024	0.044
0.069	0.018	0.04
0.073	0.047	0.136
0.113	0.025	0.03
0.044	0.047	0.09
0.048	0.033	0.057
0.153	0.045	0.068
0.104	0.084	0.029
0.055	0.054	0.051
0.094	0.048	0.059
0.06	0.075	0.046
0.113	0.078	0.051
0.06	0.049	0.084
0.071	0.044	0.07
0.052	0.061	0.045
0.146	0.069	0.088
0.057	0.058	0.085
0.081	0.077	0.07
0.13	0.035	0.129
0.083	0.03	0.037
0.089	0.095	0.045
	0.044	0.033
	0.092	0.046
	0.057	0.044
	0.032	0.031
	0.045	0.061
	0.046	0.06
	0.03	0.083
	0.061	0.08
	0.038	0.1
	0.039
	0.043
	0.03
	0.066
	0.058
	0.044
	0.079
	0.044
