# Supplementary material for: MARK2 regulates Golgi apparatus reorientation by phosphorylation of CAMSAP2 in directional cell migratio
Source: eLife journal article supplement (doi:10.7554/elife.105977), 2025-03-26
Supplement: fig4-data4 [file elife-105977-fig4-data4-v1.zip]

## Sheet: Sheet1
Accession	Description	Score	Coverage	# Proteins	# Unique Peptides	# Peptides	# PSMs	# AAs	MW [kDa]	calc. pI
A0A0A6YY67	Calmodulin-regulated spectrin-associated protein 2 OS=Mus musculus GN=Camsap2 PE=1 SV=1 - [A0A0A6YY67_MOUSE]	2479.13	56.52	6	94	95	820	1472	165.585	6.96143
	A2	Sequence	# PSMs	# Proteins	# Protein Groups	Protein Group Accessions	Modifications	ΔCn	phosphoRS Site Probabilities	q-Value	PEP	XCorr	Charge	MH+ [Da]	ΔM [ppm]	RT [min]	# Missed Cleavages
	High	TPIKGPPVSSLSLASLNTGDSESVHSGK	6	4	1	A0A0A6YY67		0		0	0.000163099	6.77857	3	2765.43	0.564248	73.1264	1
	High	SKEHHPAEAPGGQKsPSK	3	2	1	A0A0A6YY67	S15(Phospho)	0	S(1): 0.0; S(15): 99.2; S(17): 0.8	0	0.00459	6.02458	3	1951.9	-0.00331367	9.87804	2
	High	GPPVSSLSLASLNTGDSESVHSGKRtPR	13	4	1	A0A0A6YY67	T26(Phospho)	0.0051	S(5): 0.0; S(6): 0.0; S(8): 0.0; S(11): 0.0; T(14): 0.0; S(17): 0.0; S(19): 1.5; S(22): 11.3; T(26): 87.2	0	0.01182	5.86432	3	2916.42	0.462292	62.7625	2
	High	GPPVSSLSLASLNTGDSEsVHsGKRTPR	5	4	1	A0A0A6YY67	S19(Phospho); S22(Phospho)	0	S(5): 0.0; S(6): 0.0; S(8): 0.0; S(11): 0.0; T(14): 0.0; S(17): 14.4; S(19): 83.9; S(22): 16.1; T(26): 85.6	0	0.1029	5.7441	3	2996.39	0.585064	67.7958	2
	High	DWENASTTSSVASGTEYTGPK	3	6	1	A0A0A6YY67		0		0	0.0003362	5.36659	2	2187.97	0.594359	57.93	0
	High	ADVSVEKLDGEsDKEQFDDDQK	8	6	1	A0A0A6YY67	S12(Phospho)	0	S(4): 0.0; S(12): 100.0	0	0.03044	5.30597	3	2577.09	-0.72668	44.8228	2
	High	NVNLIEVSLSDLKPPEK	5	6	1	A0A0A6YY67		0		0	0.002669	5.27676	2	1895.05	0.707626	85.2747	0
	High	GEGISPLREEAAGAEDEKVYTDR	2	5	1	A0A0A6YY67		0		0	0.001081	5.23367	3	2492.19	-0.140391	52.4601	2
	High	SVsNEGLTLNNSR	9	5	1	A0A0A6YY67	S3(Phospho)	0	S(1): 91.4; S(3): 8.6; T(8): 0.0; S(12): 0.0	0	0.01086	5.22339	2	1470.66	0.174551	46.1711	0
	High	GPPVSSLSLASLNTGDSEsVHsGKR	5	4	1	A0A0A6YY67	S19(Phospho); S22(Phospho)	0	S(5): 0.0; S(6): 0.0; S(8): 0.0; S(11): 0.0; T(14): 0.1; S(17): 89.0; S(19): 21.9; S(22): 89.0	0	0.005085	5.12467	3	2642.19	0.513872	74.4029	1
	High	KQQLEAEMEHK	2	6	1	A0A0A6YY67		0		0	0.005465	5.10642	3	1370.67	-0.75541	20.006	1
	High	GPPVSSLSLASLNTGDSESVHSGK	6	4	1	A0A0A6YY67		0		0	0.001168	5.06281	2	2326.15	0.497221	70.7854	0
	High	HIIQNALAHccLAGK	12	6	1	A0A0A6YY67	C10(Carbamidomethyl); C11(Carbamidomethyl)	0		0	0.001333	5.02988	2	1705.86	0.522679	45.6679	0
	High	GEGISPLREEAAGAEDEK	4	6	1	A0A0A6YY67		0		0	0.002771	5.02967	2	1857.88	0.4732	42.2106	1
	High	LNSSLHFLQQEmQR	27	6	1	A0A0A6YY67	M12(Oxidation)	0		0	0.01181	5.00661	2	1746.86	0.170803	56.7103	0
	High	EHHPAEAPGGQKsPSK	12	2	1	A0A0A6YY67	S13(Phospho)	0	S(13): 91.6; S(15): 8.4	0	0.01757	4.98965	3	1736.78	0.0232655	11.8857	1
	High	DYTVSLDsDMDDASK	9	5	1	A0A0A6YY67	S8(Phospho)	0	Y(2): 0.0; T(3): 0.0; S(5): 0.0; S(8): 100.0; S(14): 0.0	0	0.004173	4.94916	2	1741.65	0.605694	67.5275	0
	High	WLKsPtTPVDPER	6	6	1	A0A0A6YY67	S4(Phospho); T6(Phospho)	0	S(4): 99.4; T(6): 7.5; T(7): 93.1	0	0.04375	4.9427	2	1685.73	0.673599	56.9732	1
	High	SESVEGFLsPsR	11	6	1	A0A0A6YY67	S9(Phospho); S11(Phospho)	0	S(1): 0.0; S(3): 0.0; S(9): 100.0; S(11): 100.0	0	0.0172	4.88906	2	1454.56	0.344553	72.4273	0
	High	LDGEsDKEQFDDDQK	14	6	1	A0A0A6YY67	S5(Phospho)	0	S(5): 100.0	0	0.006539	4.81432	2	1848.72	0.329275	28.9357	1
	High	GEGIsPLREEAAGAEDEK	1	6	1	A0A0A6YY67	S5(Phospho)	0	S(5): 100.0	0	0.02039	4.74599	2	1937.85	0.694081	52.8904	1
	High	GEGIsPLREEAAGAEDEKVYTDR	1	5	1	A0A0A6YY67	S5(Phospho)	0	S(5): 100.0; Y(20): 0.0; T(21): 0.0	0	0.01331	4.73922	3	2572.16	-0.121009	61.555	2
	High	KGEGISPLREEAAGAEDEK	4	6	1	A0A0A6YY67		0		0	0.005553	4.7285	2	1985.98	0.0127702	34.7467	2
	High	SDAAKPLLGHDAVIQALAQK	8	5	1	A0A0A6YY67		0		0	0.00274	4.71254	2	2046.14	0.59837	71.5726	0
	High	DTTQLLASEMVHLR	2	6	1	A0A0A6YY67		0		0	0.003836	4.69276	2	1613.83	0.346764	83.4683	0
	High	NGEKDWENASTTSSVASGTEYTGPK	5	6	1	A0A0A6YY67		0		0	0.00352	4.67933	3	2616.17	0.630133	49.7473	1
	High	KQQLEAEMEHKK	2	6	1	A0A0A6YY67		0		0	0.02609	4.67431	2	1498.77	0.0312561	17.0199	2
	High	DTTQLLASEmVHLR	25	6	1	A0A0A6YY67	M10(Oxidation)	0		0	0.005495	4.56322	2	1629.83	0.0929271	66.9286	0
	High	EEAAGAEDEKVYTDR	8	5	1	A0A0A6YY67		0		0	0.01233	4.5518	2	1682.75	0.104977	25.1343	1
	High	EQQAWVIsPPQPSPQK	13	6	1	A0A0A6YY67	S8(Phospho)	0	S(8): 100.0; S(13): 0.0	0	0.01639	4.46623	2	1899.9	0.610777	73.9638	0
	High	EQQAWVISPPQPSPQK	22	6	1	A0A0A6YY67		0		0	0.01689	4.41655	3	1819.94	0.676074	69.389	0
	High	VNEHLKDIMEQEQK	6	5	1	A0A0A6YY67		0		0	0.01436	4.39473	2	1740.86	0.407401	40.5929	1
	High	LSLQQEMLmQmR	40	6	1	A0A0A6YY67	M9(Oxidation); M11(Oxidation)	0		0	0.01121	4.31942	3	1539.73	0.760938	64.778	0
	High	LNQSsPDNLTDTK	7	5	1	A0A0A6YY67	S5(Phospho)	0	S(4): 5.6; S(5): 94.4; T(10): 0.0; T(12): 0.0	0	0.03733	4.30044	2	1512.66	0.451235	33.0133	0
	High	SEsVEGFLSPSR	11	6	1	A0A0A6YY67	S3(Phospho)	0	S(1): 0.6; S(3): 99.4; S(9): 0.0; S(11): 0.0	0	0.02095	4.28267	2	1374.59	0.114484	72.7796	0
	High	TSVHGVSFDISFDKEDSAQSSTPNR	1	5	1	A0A0A6YY67		0		0	0.008998	4.25703	3	2711.26	1.38739	67.382	1
	High	VNEHLKDImEQEQK	3	5	1	A0A0A6YY67	M9(Oxidation)	0		0	0.0117	4.25088	2	1756.85	0.379813	25.0469	1
	High	GPPVSSLSLASLNTGDsESVHSGKR	12	4	1	A0A0A6YY67	S17(Phospho)	0	S(5): 0.0; S(6): 0.0; S(8): 0.0; S(11): 0.0; T(14): 0.1; S(17): 89.9; S(19): 9.1; S(22): 1.0	0	0.006061	4.24814	3	2562.22	0.729224	68.8632	1
	High	LSLQQEMLMQmR	17	6	1	A0A0A6YY67	M11(Oxidation)	0		0	0.01383	4.23481	2	1523.74	0.404721	72.4198	0
	High	KEPsEcKGTLGPcDHNPGEK	3	6	1	A0A0A6YY67	S4(Phospho); C6(Carbamidomethyl); C13(Carbamidomethyl)	0	S(4): 99.0; T(9): 1.0	0	0.01227	4.22321	3	2319.97	0.185694	21.0114	2
	High	LDGESDKEQFDDDQK	7	6	1	A0A0A6YY67		0		0	0.007893	4.22017	2	1768.75	0.356829	24.6122	1
	High	DYTVSLDSDmDDASK	18	5	1	A0A0A6YY67	M10(Oxidation)	0		0	0.001559	4.17534	2	1677.68	0.544377	49.9251	0
	High	LNSSLHFLQQEMQR	7	6	1	A0A0A6YY67		0		0	0.01955	4.16031	2	1730.87	0.549248	72.0701	0
	High	SSSmSYVDGFIGTWPK	2	5	1	A0A0A6YY67	M4(Oxidation)	0		0	0.005341	4.08477	2	1777.81	0.476122	84.4909	0
	High	LNQSSPDNLTDTK	16	5	1	A0A0A6YY67		0		0	0.009842	4.05804	2	1432.69	0.321653	26.8725	0
	High	EALsPcPsTIsTK	6	5	1	A0A0A6YY67	S4(Phospho); C6(Carbamidomethyl); S8(Phospho); S11(Phospho)	0	S(4): 100.0; S(8): 50.0; T(9): 50.0; S(11): 92.6; T(12): 7.4	0	0.01596	4.05777	2	1630.59	0.0868659	47.7373	0
	High	SLADIKESmETPPGR	4	6	1	A0A0A6YY67	M9(Oxidation)	0		0	0.007116	4.05524	2	1646.81	0.643581	37.4966	1
	High	LSLQQEmLmQmR	26	6	1	A0A0A6YY67	M7(Oxidation); M9(Oxidation); M11(Oxidation)	0		0	0.02403	4.02414	2	1555.73	0.73479	45.5723	0
	High	SVSNEGLTLNNSR	7	5	1	A0A0A6YY67		0		0	0.009681	3.99049	2	1390.69	-0.0626305	38.8592	0
	High	ADVsVEKLDGEsDKEQFDDDQK	2	6	1	A0A0A6YY67	S4(Phospho); S12(Phospho)	0	S(4): 100.0; S(12): 100.0	0	0.1198	3.97458	3	2657.05	-0.00114201	51.6064	2
	High	SFVcFGDDGEPQKEPK	8	6	1	A0A0A6YY67	C4(Carbamidomethyl)	0		0	0.03394	3.92929	2	1839.82	0.431637	52.3674	1
	High	SESVEGFLSPSR	8	6	1	A0A0A6YY67		0		0	0.02458	3.91612	2	1294.63	0.987471	64.9026	0
	High	SKsLADIKESMETPPGR	6	6	1	A0A0A6YY67	S3(Phospho)	0	S(1): 7.8; S(3): 92.2; S(10): 0.0; T(13): 0.0	0	0.02254	3.88726	3	1925.9	0.148843	49.9365	2
	High	LNQSsPDNLtDTK	3	5	1	A0A0A6YY67	S5(Phospho); T10(Phospho)	0	S(4): 0.7; S(5): 99.3; T(10): 50.0; T(12): 50.0	0	0.03853	3.85788	2	1592.62	0.41451	30.6672	0
	High	SLADIKESMETPPGR	2	6	1	A0A0A6YY67		0		0	0.01125	3.85641	2	1630.81	-0.447169	54.5096	1
	High	AKIAcNLAWLVAK	2	5	1	A0A0A6YY67	C5(Carbamidomethyl)	0		0	0.01511	3.77022	2	1457.83	-0.108283	80.8563	1
	High	SLYTYcPETEEINK	19	6	1	A0A0A6YY67	C6(Carbamidomethyl)	0		0	0.01909	3.76745	3	1746.79	0.222464	58.8942	0
	High	LLQDYDLRAsNPR	1	5	1	A0A0A6YY67	S10(Phospho)	0	Y(5): 0.0; S(10): 100.0	0	0.08615	3.76042	2	1640.78	0.267181	54.2982	1
	High	FsPSQVPIQTR	3	6	1	A0A0A6YY67	S2(Phospho)	0	S(2): 100.0; S(4): 0.0; T(10): 0.0	0	0.01719	3.69901	2	1339.64	-0.159626	63.832	0
	High	IAcNLAWLVAK	5	5	1	A0A0A6YY67	C3(Carbamidomethyl)	0		0	0.01383	3.69118	2	1258.7	0.270395	84.6614	0
	High	LSLQQEMLMQMR	1	6	1	A0A0A6YY67		0		0	0.02277	3.6888	2	1507.74	0.679726	83.6262	0
	High	TFIVPAIKPFDHYDFSR	1	5	1	A0A0A6YY67		0		0	0.002185	3.66427	2	2053.06	0.47348	83.8987	0
	High	SFVcFGDDGEPQK	4	6	1	A0A0A6YY67	C4(Carbamidomethyl)	0		0	0.01331	3.63873	2	1485.63	0.392006	59.4962	0
	High	DHIEsPKTPIK	3	6	1	A0A0A6YY67	S5(Phospho)	0	S(5): 100.0; T(8): 0.0	0	0.1455	3.62709	3	1344.66	-0.282639	28.3351	1
	High	DYTVSLDSDMDDASK	8	5	1	A0A0A6YY67		0		0	0.00968	3.60998	2	1661.69	0.427941	62.3189	0
	High	NIRDsSSSSDFSSR	1	5	1	A0A0A6YY67	S5(Phospho)	0	S(5): 99.4; S(6): 0.6; S(7): 0.0; S(8): 0.0; S(9): 0.0; S(12): 0.0; S(13): 0.0	0	0.05703	3.58005	2	1624.66	0.611802	24.6962	1
	High	GPPVSSLSLASLNTGDSESVHSGKR	5	4	1	A0A0A6YY67		0		0	0.0188	3.57731	3	2482.25	-0.0742691	63.3133	1
	High	SSSMSYVDGFIGTWPK	2	5	1	A0A0A6YY67		0		0	0.01635	3.53095	2	1761.82	0.781403	84.4124	0
	High	DDQKAENDMAmK	5	6	1	A0A0A6YY67	M11(Oxidation)	0		0	0.04836	3.50669	3	1411.58	-0.696726	15.6799	1
	High	DYTVSLDsDmDDASK	15	5	1	A0A0A6YY67	S8(Phospho); M10(Oxidation)	0	Y(2): 0.0; T(3): 0.0; S(5): 0.0; S(8): 100.0; S(14): 0.0	0	0.003779	3.50377	2	1757.65	0.576313	51.6682	0
	High	VVRPQGAEPAKDVPSVPVLNAAK	9	5	1	A0A0A6YY67		0		0	0.03548	3.47999	3	2342.32	0.232676	62.52	1
	High	GPPVSSLSLAsLNTGDSESVHSGK	1	4	1	A0A0A6YY67	S11(Phospho)	0	S(5): 2.4; S(6): 12.5; S(8): 12.5; S(11): 70.2; T(14): 2.4; S(17): 0.0; S(19): 0.0; S(22): 0.0	0	0.05995	3.45117	3	2406.12	0.567262	72.655	0
	High	TPIKGPPVSSLSLASLNTGDSESVHSGKR	3	4	1	A0A0A6YY67		0		0	0.01015	3.44216	3	2921.53	0.581104	67.0141	2
	High	DSsSSSDFSSR	3	5	1	A0A0A6YY67	S3(Phospho)	0.0365	S(2): 0.3; S(3): 94.0; S(4): 5.4; S(5): 0.3; S(6): 0.0; S(9): 0.0; S(10): 0.0	0	0.06399	3.43448	2	1241.43	0.28532	21.1666	0
	High	VccGFFFKDDQK	3	6	1	A0A0A6YY67	C2(Carbamidomethyl); C3(Carbamidomethyl)	0		0	0.02921	3.41858	2	1550.68	0.764017	59.1534	1
	High	WLKsPTTPVDPER	8	6	1	A0A0A6YY67	S4(Phospho)	0	S(4): 33.3; T(6): 33.3; T(7): 33.3	0	0.07458	3.4172	2	1605.77	0.417018	55.6572	1
	High	SKsLADIKESmETPPGR	4	6	1	A0A0A6YY67	S3(Phospho); M11(Oxidation)	0	S(1): 9.4; S(3): 90.6; S(10): 0.0; T(13): 0.0	0	0.04955	3.41463	3	1941.9	0.000290067	33.45	2
	High	DDQKAENDMAMK	1	6	1	A0A0A6YY67		0		0	0.07613	3.40282	2	1395.59	-0.205804	20.7501	1
	High	RFsPSQVPIQTR	9	6	1	A0A0A6YY67	S3(Phospho)	0	S(3): 99.1; S(5): 0.9; T(11): 0.0	0	0.1023	3.37372	2	1495.74	0.397708	54.9875	1
	High	SPTtPVDPER	6	6	1	A0A0A6YY67	T4(Phospho)	0	S(1): 0.0; T(3): 5.4; T(4): 94.6	0	0.05011	3.36636	2	1178.51	0.100552	27.4734	0
	High	RSSSmSYVDGFIGTWPK	1	5	1	A0A0A6YY67	M5(Oxidation)	0		0	0.03429	3.36442	2	1933.91	0.855864	81.5542	1
	High	KGEGISPLR	3	6	1	A0A0A6YY67		0		0	0.1234	3.29575	2	956.552	-0.378179	26.7912	1
	High	RTSVHGVSFDISFDKEDSAQSSTPNR	1	5	1	A0A0A6YY67		0		0	0.11	3.28487	4	2867.36	0.269464	59.9047	2
	High	KQQLEAEmEHK	6	6	1	A0A0A6YY67	M8(Oxidation)	0		0	0.1729	3.27787	2	1386.67	0.267115	13.4974	1
	High	TLSASVDAITIHSHLWQTK	1	6	1	A0A0A6YY67		0		0	0.008518	3.26146	2	2108.12	0.705148	78.3659	0
	High	DSSSSSDFSSR	6	5	1	A0A0A6YY67		0		0	0.02833	3.24189	2	1161.47	0.00895447	19.0051	0
	High	GTLGPcDHNPGEK	6	6	1	A0A0A6YY67	C6(Carbamidomethyl)	0		0	0.03729	3.23891	2	1381.62	-0.744915	20.1134	0
	High	NIRDssSSSDFSSR	4	5	1	A0A0A6YY67	S5(Phospho); S6(Phospho)	0	S(5): 90.5; S(6): 13.1; S(7): 45.8; S(8): 45.8; S(9): 4.8; S(12): 0.0; S(13): 0.0	0	0.1212	3.22898	2	1704.63	-0.289377	26.8164	1
	High	LmEDMDTVIKPRPQAAK	18	6	1	A0A0A6YY67	M2(Oxidation)	0		0	0.02257	3.22468	2	1959.01	0.579979	43.0649	0
	High	SPttPVDPER	1	6	1	A0A0A6YY67	T3(Phospho); T4(Phospho)	0	S(1): 99.4; T(3): 50.3; T(4): 50.3	0	0.1102	3.21773	2	1258.48	0.0763588	27.94	0
	High	YTRPQTHSSASGGIR	7	5	1	A0A0A6YY67		0		0	0.04207	3.20166	2	1617.81	-0.446296	18.8216	0
	High	TTPEGSELNIPHVVSWAQIPEEAGVAPGR	1	6	1	A0A0A6YY67		0		0	0.1061	3.19977	3	3041.53	0.370997	85.1059	0
	High	LMEDMDTVIKPRPQAAK	3	6	1	A0A0A6YY67		0		0	0.01139	3.18761	2	1943.01	0.355044	53.0642	0
	High	yTRPQTHSSASGGIR	6	5	1	A0A0A6YY67	Y1(Phospho)	0	Y(1): 49.8; T(2): 49.8; T(6): 0.4; S(8): 0.0; S(9): 0.0; S(11): 0.0	0	0.06663	3.18112	3	1697.78	1.89036	17.0001	0
	High	LmEDmDTVIKPRPQAAK	4	6	1	A0A0A6YY67	M2(Oxidation); M5(Oxidation)	0		0	0.008746	3.13128	2	1975	0.924886	28.7335	0
	High	sQPGSSASSSSGVK	6	5	1	A0A0A6YY67	S1(Phospho)	0	S(1): 100.0; S(5): 0.0; S(6): 0.0; S(8): 0.0; S(9): 0.0; S(10): 0.0; S(11): 0.0	0	0.06318	3.09971	2	1345.56	0.254065	16.6434	0
	High	KGEGIsPLREEAAGAEDEK	3	6	1	A0A0A6YY67	S6(Phospho)	0	S(6): 100.0	0	0.05138	3.06725	3	2065.94	0.3199	44.2109	2
	High	NIRDSSSSSDFSSR	3	5	1	A0A0A6YY67		0		0	0.07819	3.03632	2	1544.69	0.341877	22.0177	1
	High	SASFSVKNQR	1	6	1	A0A0A6YY67		0		0	0.1134	3.02281	2	1123.58	-1.08153	20.0169	1
	High	LLQDYDLR	3	5	1	A0A0A6YY67		0		0	0.1641	3.01347	2	1035.55	0.188731	54.8185	0
	High	VccGFFFK	10	6	1	A0A0A6YY67	C2(Carbamidomethyl); C3(Carbamidomethyl)	0		0	0.1004	2.99706	2	1064.47	0.130253	75.1726	0
	High	DDQKAENDMAmKR	1	6	1	A0A0A6YY67	M11(Oxidation)	0		0	0.1601	2.95772	2	1567.68	-0.550642	15.4935	2
	High	EALsPcPsTISTK	4	5	1	A0A0A6YY67	S4(Phospho); C6(Carbamidomethyl); S8(Phospho)	0	S(4): 100.0; S(8): 98.9; T(9): 1.1; S(11): 0.0; T(12): 0.0	0	0.09132	2.91371	2	1550.62	0.105796	50.5324	0
	High	GLYVTDQEK	7	5	1	A0A0A6YY67		0		0	0.123	2.91261	2	1052.53	-0.20801	32.8461	0
	High	LPNGALQNR	2	5	1	A0A0A6YY67		0		0	0.08536	2.89259	2	982.543	-0.255625	28.483	0
	High	QAGLSSAAAPFSSDSPRPTHPSPQSSTR	5	6	1	A0A0A6YY67		0		0	0.03321	2.88887	4	2824.36	0.602013	45.6599	0
	High	MTSFAEQKFR	1	6	1	A0A0A6YY67		0		0	0.1517	2.86966	2	1244.61	-0.278788	39.9007	1
	High	RFSPSQVPIQTR	3	6	1	A0A0A6YY67		0		0	0.1482	2.79492	2	1415.78	0.867105	44.2739	1
	High	TAFLTVVKK	1	6	1	A0A0A6YY67		0		0	0.1564	2.75541	2	1006.63	-0.148188	46.2567	1
	High	SIHRDHIESPK	3	6	1	A0A0A6YY67		0		0	0.1274	2.72865	2	1318.69	0.0421599	15.5136	1
	High	AENDMAMK	1	6	1	A0A0A6YY67		0		0	0.08529	2.71888	2	909.38	-0.123829	19.7565	0
	High	sIHRDHIESPK	2	6	1	A0A0A6YY67	S1(Phospho)	0	S(1): 100.0; S(9): 0.0	0	0.161	2.71331	2	1398.65	1.07105	17.6121	1
	High	RFsPsQVPIQTR	1	6	1	A0A0A6YY67	S3(Phospho); S5(Phospho)	0	S(3): 100.0; S(5): 100.0; T(11): 0.0	0	0.1741	2.63276	2	1575.71	0.0534246	63.8135	1
	High	EEAAGAEDEKVyTDR	1	5	1	A0A0A6YY67	Y12(Phospho)	0	Y(12): 92.9; T(13): 7.1	0	0.01859	2.63155	2	1762.72	0.0875036	22.6859	1
	High	LTGIGPKSITK	1	6	1	A0A0A6YY67		0		0	0.1095	2.60003	2	1114.68	-0.0540986	35.8087	1
	High	SQPGSSASSSSGVK	3	5	1	A0A0A6YY67		0		0	0.02782	2.59762	2	1265.6	-0.0979884	14.7369	0
	High	EALSPcPSTIsTKsQPGSSASSSSGVK	1	5	1	A0A0A6YY67	C6(Carbamidomethyl); S11(Phospho); S14(Phospho)	0	S(4): 0.0; S(8): 0.4; T(9): 12.3; S(11): 74.2; T(12): 12.5; S(14): 9.1; S(18): 1.9; S(19): 54.0; S(21): 8.9; S(22): 8.9; S(23): 8.9; S(24): 8.9	0	0.1436	2.58327	3	2797.2	1.00302	46.4602	1
	High	LLQDyDLR	1	5	1	A0A0A6YY67	Y5(Phospho)	0	Y(5): 100.0	0	0.1416	2.57648	2	1115.51	-0.282604	54.3964	0
	High	VVRPQGAEPAK	3	5	1	A0A0A6YY67		0		0	0.02233	2.56871	3	1151.65	-0.900463	16.8264	0
	High	ESmETPPGR	5	6	1	A0A0A6YY67	M3(Oxidation)	0		0	0.106	2.55105	2	1019.45	-0.199892	16.3019	0
	High	ADVSVEKLDGESDKEQFDDDQK	1	6	1	A0A0A6YY67		0		0	0.07716	2.52883	3	2497.12	0.994418	44.414	2
	High	QAGLSSAAAPFSSDsPRPTHPSPQSSTR	20	6	1	A0A0A6YY67	S15(Phospho)	0	S(5): 0.0; S(6): 0.0; S(12): 0.6; S(13): 3.1; S(15): 96.2; T(19): 0.0; S(22): 0.0; S(25): 0.0; S(26): 0.0; T(27): 0.0	0	0.04069	2.4518	3	2904.33	0.519307	47.665	0
	High	mTSFAEQKFR	1	6	1	A0A0A6YY67	M1(Oxidation)	0		0	0.1723	2.45162	2	1260.6	0.0788079	32.4948	1
	High	mIEGLYK	3	6	1	A0A0A6YY67	M1(Oxidation)	0		0	0.177	2.43633	2	869.444	-0.12098	38.6085	0
	High	MGDAADPR	1	5	1	A0A0A6YY67		0		0	0.1481	2.43233	2	832.362	-0.266033	16.6528	0
	High	FSPSQVPIQTR	7	6	1	A0A0A6YY67		0		0	0.04256	2.40156	2	1259.67	0.235653	54.5583	0
	High	QQLEAEmEHKKEETR	1	6	1	A0A0A6YY67	M7(Oxidation)	0		0	0.1302	2.39088	2	1901.9	0.841206	13.9619	2
	High	SSsmSYVDGFIGTWPK	3	5	1	A0A0A6YY67	S3(Phospho); M4(Oxidation)	0	S(1): 32.9; S(2): 32.9; S(3): 32.9; S(5): 1.2; Y(6): 0.3; T(13): 0.0	0	0.1735	2.29612	2	1857.78	0.377859	85.3017	0
	High	QQLEAEmEHK	1	6	1	A0A0A6YY67	M7(Oxidation)	0		0	0.1049	2.28365	3	1258.57	-0.201896	16.0458	0
	High	DVPSVPVLNAAK	1	5	1	A0A0A6YY67		0		0	0.0227	2.24285	2	1209.68	0.347529	73.8688	0
	High	EALSPcPSTISTK	3	5	1	A0A0A6YY67	C6(Carbamidomethyl)	0		0	0.0594	2.24023	2	1390.69	0.413516	42.0241	0
	High	ESMETPPGR	1	6	1	A0A0A6YY67		0		0	0.1771	2.21769	2	1003.45	0.0820312	21.9123	0
	High	mEAAFTK	2	6	1	A0A0A6YY67	M1(Oxidation)	0		0	0.1809	2.16267	2	813.381	0.281485	22.9979	0
	High	EALSPcPsTIsTKsQPGSSASSSSGVK	1	5	1	A0A0A6YY67	C6(Carbamidomethyl); S8(Phospho); S11(Phospho); S14(Phospho)	0	Too many isoforms	0.001	0.2246	3.97856	3	2877.17	0.161235	48.9868	1
	High	YTRPQTHSsAsGGIR	2	5	1	A0A0A6YY67	S9(Phospho); S11(Phospho)	0.0276	Y(1): 0.0; T(2): 0.0; T(6): 0.6; S(8): 13.2; S(9): 98.1; S(11): 88.2	0.001	0.1971	3.87162	2	1777.74	0.392638	20.6698	0
	High	GPPVSSLSLASLNTGDsEsVHsGKRTPR	4	4	1	A0A0A6YY67	S17(Phospho); S19(Phospho); S22(Phospho)	0	S(5): 0.0; S(6): 0.1; S(8): 0.1; S(11): 0.6; T(14): 6.1; S(17): 66.9; S(19): 66.9; S(22): 67.2; T(26): 92.1	0.001	0.2036	2.92198	4	3076.35	0.1614	72.6509	2
	High	SLADIKEsMETPPGR	2	6	1	A0A0A6YY67	S8(Phospho)	0	S(1): 0.0; S(8): 50.0; T(11): 50.0	0.001	0.1925	2.8956	2	1710.78	1.20177	53.2799	1
	High	SPTTPVDPER	3	6	1	A0A0A6YY67		0		0.001	0.2086	2.7264	2	1098.54	-0.205093	27.2983	0
	High	EEIKKEPSEcK	2	6	1	A0A0A6YY67	C10(Carbamidomethyl)	0		0.001	0.2036	2.65549	2	1376.67	-0.0147307	12.8711	2
	High	MEAAFTKQR	1	6	1	A0A0A6YY67		0		0.001	0.201	2.61309	2	1081.55	-0.794933	23.0757	1
	High	KKGEGISPLR	2	6	1	A0A0A6YY67		0		0.001	0.2242	2.59265	2	1084.65	-0.6705	19.9243	2
	High	DSGcQFR	3	6	1	A0A0A6YY67	C4(Carbamidomethyl)	0		0.001	0.2275	2.52205	2	869.357	-0.51799	19.348	0
	High	sFVcFGDDGEPQKEPK	2	6	1	A0A0A6YY67	S1(Phospho); C4(Carbamidomethyl)	0	S(1): 100.0	0.001	0.2097	2.52022	2	1919.79	0.465571	56.8269	1
	High	DSSSssDFSSR	1	5	1	A0A0A6YY67	S5(Phospho); S6(Phospho)	0	S(2): 0.9; S(3): 90.4; S(4): 12.3; S(5): 47.9; S(6): 47.9; S(9): 0.5; S(10): 0.1	0.001	0.1915	2.43374	2	1321.4	0.251097	21.93	0
	High	TLTPPRsVDSLPR	1	6	1	A0A0A6YY67	S7(Phospho)	0	T(1): 0.0; T(3): 0.0; S(7): 99.7; S(10): 0.3	0.001	0.1889	2.40903	2	1518.77	0.545123	57.51	1
	High	DImEQEQK	2	5	1	A0A0A6YY67	M3(Oxidation)	0		0.001	0.2188	2.32877	2	1036.46	-0.010468	15.4417	0
	High	LYKEPSAK	2	23	2	Q80VC9-9;A0A0A6YY67		0		0.001	0.2298	2.3215	2	935.519	-0.38117	17.575	1
	High	GEGISPLR	1	6	1	A0A0A6YY67		0		0.001	0.2249	2.15753	2	828.457	-0.142808	35.951	0
	High	TAFLTVVK	3	6	1	A0A0A6YY67		0		0.001	0.186	2.09863	2	878.535	0.246248	64.9557	0
	High	DIMEQEQK	1	5	1	A0A0A6YY67		0		0.001	0.2146	2.07051	2	1020.47	-0.268576	24.7103	0
	High	QIRDFKPR	1	6	1	A0A0A6YY67		0		0.002	0.2671	2.86926	2	1059.61	0.154142	21.3435	1
	High	QAGLSSAAAPFSSDSPRPTHPSPQssTR	1	6	1	A0A0A6YY67	S25(Phospho); S26(Phospho)	0	S(5): 0.0; S(6): 0.0; S(12): 0.1; S(13): 0.1; S(15): 1.0; T(19): 84.5; S(22): 22.2; S(25): 30.7; S(26): 30.7; T(27): 30.7	0.006	0.2852	3.0927	4	2984.29	-0.999628	53.7366	0
	High	AGSLILK	1	5	1	A0A0A6YY67		0		0.006	0.2833	2.60142	2	701.456	-0.0389119	40.4198	0
	High	KILEEMEK	1	6	1	A0A0A6YY67		0		0.006	0.2892	2.33298	2	1019.54	-0.343741	28.8473	1
	High	KmEAAFTK	1	6	1	A0A0A6YY67	M2(Oxidation)	0		0.009	0.3019	2.20505	2	941.476	-0.2747	15.9781	1
Q99PV0	Pre-mRNA-processing-splicing factor 8 OS=Mus musculus GN=Prpf8 PE=1 SV=2 - [PRP8_MOUSE]	73.6881	10.19	4	23	23	28	2335	273.443	8.83643
	A2	Sequence	# PSMs	# Proteins	# Protein Groups	Protein Group Accessions	Modifications	ΔCn	phosphoRS Site Probabilities	q-Value	PEP	XCorr	Charge	MH+ [Da]	ΔM [ppm]	RT [min]	# Missed Cleavages
	High	GSELQLPFQAcLK	1	1	1	Q99PV0	C11(Carbamidomethyl)	0		0	0.03565	3.8341	2	1490.77	0.00953389	84.5177	0
	High	LIVDHNIADYMTAK	1	3	1	Q99PV0		0		0	0.07439	3.62645	2	1603.82	0.727227	74.4267	0
	High	NNVNVASLTQSEIR	1	1	1	Q99PV0		0		0	0.004959	3.5388	2	1544.8	0.243969	63.1266	0
	High	DGVWNLQNEVTK	3	1	1	Q99PV0		0		0	0.03581	3.35979	2	1402.7	0.197784	72.0878	0
	High	ANPALYVLR	2	1	1	Q99PV0		0		0	0.09085	3.22552	2	1016.59	-0.108849	68.9443	0
	High	TNHIYVSSDDIK	1	2	1	Q99PV0		0		0	0.07871	3.1202	2	1391.68	0.212851	35.6064	0
	High	FGNAFHLcR	1	3	1	Q99PV0	C8(Carbamidomethyl)	0		0	0.09535	2.93248	2	1121.53	-1.00091	48.2969	0
	High	LLILALER	1	3	1	Q99PV0		0		0	0.1189	2.84736	2	940.619	-0.417164	84.4166	0
	High	VQMLLSDR	1	2	1	Q99PV0		0		0	0.1538	2.67757	2	961.513	-0.681513	51.2407	0
	High	FPPVVFYTPK	2	1	1	Q99PV0		0		0	0.04735	2.59416	2	1194.66	0.313252	83.9511	0
	High	mNSScADILLFASYK	1	1	1	Q99PV0	M1(Oxidation); C5(Carbamidomethyl)	0		0	0.05422	2.5933	2	1735.8	-0.0784974	84.6048	0
	High	QILMASGSTTFTK	2	1	1	Q99PV0		0		0	0.1692	2.54012	2	1384.71	-0.163582	60.6839	0
	High	DmNHTNSYGIIR	1	3	1	Q99PV0	M2(Oxidation)	0		0	0.089	2.53997	3	1436.66	-0.432318	37.2778	0
	High	ISLIQIFR	1	1	1	Q99PV0		0		0	0.1208	2.40384	2	989.614	0.157821	86.82	0
	High	IIHTSVWAGQK	1	1	1	Q99PV0		0		0	0.0858	2.39307	2	1239.68	0.307136	38.697	0
	High	SLPVEEQPK	1	1	1	Q99PV0		0		0	0.07408	2.26503	2	1026.55	0.145369	30.9191	0
	High	FGFVDAQK	1	3	1	Q99PV0		0		0	0.1745	2.19779	2	911.462	-0.184981	51.5342	0
	High	QTDVGITHFR	1	1	1	Q99PV0		0		0	0.05663	2.06457	2	1173.6	0.60748	38.7728	0
	High	IDLTLLNR	1	3	1	Q99PV0		0		0.001	0.2299	2.14973	2	957.573	0.318911	78.1759	0
	High	TISSYTAFSR	1	1	1	Q99PV0		0		0.001	0.1866	2.11878	2	1132.56	0.484805	50.0405	0
	High	GYLPSHYER	1	2	1	Q99PV0		0		0.001	0.2266	2.05029	2	1121.54	-1.89506	32.1306	0
	High	LWNLNNYR	1	1	1	Q99PV0		0		0.002	0.2447	2.40396	2	1092.56	-0.122732	67.5302	0
	High	QQIAEIEK	1	2	1	Q99PV0		0		0.002	0.2531	2.04196	2	958.52	0.00212926	29.037	0
E9Q9N6	Non-specific serine/threonine protein kinase OS=Mus musculus GN=Mark2 PE=1 SV=1 - [E9Q9N6_MOUSE]	51.461	17.96	35	11	11	19	707	79.0426	9.64209
	A2	Sequence	# PSMs	# Proteins	# Protein Groups	Protein Group Accessions	Modifications	ΔCn	phosphoRS Site Probabilities	q-Value	PEP	XCorr	Charge	MH+ [Da]	ΔM [ppm]	RT [min]	# Missed Cleavages
	High	NSATSADEQPHIGNYR	1	17	1	E9Q9N6		0		0	0.005138	4.83903	2	1759.8	0.771422	31.7263	0
	High	DTEQPTLGHLDSKPsSK	5	12	1	E9Q9N6	S15(Phospho)	0	T(2): 0.0; T(6): 0.0; S(12): 0.7; S(15): 49.6; S(16): 49.6	0	0.03235	4.64154	2	1919.88	0.688514	36.5717	0
	High	VPVASPsAHNISSSSGAPDR	2	18	1	E9Q9N6	S7(Phospho)	0	S(5): 0.0; S(7): 99.9; S(12): 0.0; S(13): 0.0; S(14): 0.0; S(15): 0.0	0	0.1136	3.46173	2	2015.92	0.76149	37.3835	0
	High	IIDKTQLNSSSLQK	1	15	1	E9Q9N6		0		0	0.02725	3.32685	2	1574.88	0.887055	36.1287	1
	High	EEIQDSLVGQR	2	12	1	E9Q9N6		0		0	0.06974	3.1096	2	1273.64	-0.174443	46.722	0
	High	QIVSAVQYcHQK	2	23	1	E9Q9N6	C9(Carbamidomethyl)	0		0	0.04443	3.08977	2	1460.73	-0.335907	31.796	0
	High	DTEQPTLGHLDSKPSSK	1	12	1	E9Q9N6		0		0	0.03144	2.94515	2	1839.91	0.796962	31.3186	0
	High	LFEVIETEK	1	26	1	E9Q9N6		0		0	0.1085	2.93026	2	1107.59	-0.296312	66.9127	0
	High	TQLNSSSLQK	1	15	1	E9Q9N6		0		0	0.1784	2.55004	2	1105.58	-0.26325	24.6997	0
	High	TPLPTLNER	1	12	1	E9Q9N6		0		0	0.06878	2.38074	2	1040.57	-0.466718	50.3659	0
	High	FLILNPSK	1	13	1	E9Q9N6		0		0.001	0.2003	2.22135	2	931.561	-0.553685	70.796	0
	High	VPASPLPGLDR	1	16	1	E9Q9N6		0		0.001	0.2059	2.12973	2	1121.63	-0.223055	62.6819	0
P02535-3	Isoform 3 of Keratin, type I cytoskeletal 10 OS=Mus musculus GN=Krt10 - [K1C10_MOUSE]	44.4516	11.69	8	4	5	14	462	49.4709	5.021
	A2	Sequence	# PSMs	# Proteins	# Protein Groups	Protein Group Accessions	Modifications	ΔCn	phosphoRS Site Probabilities	q-Value	PEP	XCorr	Charge	MH+ [Da]	ΔM [ppm]	RT [min]	# Missed Cleavages
	High	ALEESNYELEGK	5	4	1	P02535-3		0		0	0.02987	3.85432	2	1381.65	0.367633	42.9744	0
	High	QSLEASLAETEGR	2	4	1	P02535-3		0		0	0.01549	3.51239	2	1390.68	0.456505	54.8235	0
	High	LENEIQTYR	2	4	1	P02535-3		0		0	0.078	3.20618	2	1165.59	0.273945	37.3225	0
	High	QSVEADINGLR	2	6	1	P02535-3		0		0	0.02327	3.05111	2	1201.62	0.739246	53.7567	0
	High	VTMQNLNDR	2	14	3	P02535-3;Q61781;Q9Z2K1		0		0	0.06831	2.84774	2	1090.53	-0.530195	30.9901	0
	High	VTmQNLNDR	1	14	3	P02535-3;Q61781;Q9Z2K1	M3(Oxidation)	0		0	0.05952	2.64759	2	1106.53	-0.339808	18.4977	0
Q922U2	Keratin, type II cytoskeletal 5 OS=Mus musculus GN=Krt5 PE=1 SV=1 - [K2C5_MOUSE]	34.9177	13.62	9	9	10	12	580	61.7286	7.75244
	A2	Sequence	# PSMs	# Proteins	# Protein Groups	Protein Group Accessions	Modifications	ΔCn	phosphoRS Site Probabilities	q-Value	PEP	XCorr	Charge	MH+ [Da]	ΔM [ppm]	RT [min]	# Missed Cleavages
	High	YEELQQTAGR	1	1	1	Q922U2		0		0	0.01613	4.02447	2	1194.57	-0.291937	26.3099	0
	High	SRTEAESWYQTK	1	1	1	Q922U2		0		0	0.08488	3.44881	2	1485.7	-0.208992	32.88	1
	High	LRSEIDNVKK	1	2	1	Q922U2		0		0	0.1165	3.37581	3	1201.69	-0.174225	18.849	2
	High	KLLEGEEcR	2	22	5	P50446;Q99MH7;Q3UV17;Q922U2;B2RTP7	C8(Carbamidomethyl)	0		0	0.1276	3.02859	3	1133.56	-0.816887	21.52	1
	High	TEAESWYQTK	1	1	1	Q922U2		0		0	0.07461	2.8668	2	1242.56	0.807656	39.4052	0
	High	HEISEMNR	1	1	1	Q922U2		0		0	0.1114	2.73493	2	1015.46	0.0312645	17.9122	0
	High	EYQELMNTK	1	2	1	Q922U2		0		0	0.1522	2.70503	2	1155.53	-0.11388	38.5267	0
	High	TTAENEFVmLK	1	1	1	Q922U2	M9(Oxidation)	0		0	0.0802	2.47032	2	1298.63	-0.610221	58.145	0
	High	NKYEDEINKR	2	7	1	Q922U2		0		0.001	0.1948	2.65728	3	1308.65	-0.56028	21.1577	2
	High	SEIDNVKK	1	2	1	Q922U2		0		0.008	0.2987	2.14495	2	932.504	-0.560078	16.5597	1
Q61781	Keratin, type I cytoskeletal 14 OS=Mus musculus GN=Krt14 PE=1 SV=2 - [K1C14_MOUSE]	30.5824	10.95	11	1	6	10	484	52.8339	5.17334
	A2	Sequence	# PSMs	# Proteins	# Protein Groups	Protein Group Accessions	Modifications	ΔCn	phosphoRS Site Probabilities	q-Value	PEP	XCorr	Charge	MH+ [Da]	ΔM [ppm]	RT [min]	# Missed Cleavages
	High	cEMEQQNQEYK	1	3	2	Q61781;Q61782	C1(Carbamidomethyl)	0		0	0.01423	4.03877	2	1486.59	0.439024	21.2579	0
	High	EVATNSELVQSGK	1	2	1	Q61781		0		0	0.02063	3.92837	2	1361.69	0.239656	30.2448	0
	High	TRLEQEIATYR	2	13	4	Q61781;Q6IFX2;Q9Z2K1;Q61782		0		0	0.0553	3.24864	2	1379.73	-0.332515	48.1119	1
	High	LEQEIATYR	1	16	4	Q61781;Q6IFX2;Q9Z2K1;Q61782		0		0	0.1579	3.06656	2	1122.58	-0.411989	39.0611	0
	High	VTMQNLNDR	2	14	3	P02535-3;Q61781;Q9Z2K1		0		0	0.06831	2.84774	2	1090.53	-0.530195	30.9901	0
	High	VLDELTLAR	2	6	2	Q61781;Q6IFX2		0		0	0.06115	2.72892	2	1029.59	-0.258132	66.6012	0
	High	VTmQNLNDR	1	14	3	P02535-3;Q61781;Q9Z2K1	M3(Oxidation)	0		0	0.05952	2.64759	2	1106.53	-0.339808	18.4977	0
P04104	Keratin, type II cytoskeletal 1 OS=Mus musculus GN=Krt1 PE=1 SV=4 - [K2C1_MOUSE]	30.1264	3.77	3	3	3	9	637	65.5653	8.14795
	A2	Sequence	# PSMs	# Proteins	# Protein Groups	Protein Group Accessions	Modifications	ΔCn	phosphoRS Site Probabilities	q-Value	PEP	XCorr	Charge	MH+ [Da]	ΔM [ppm]	RT [min]	# Missed Cleavages
	High	FLEQQNQVLQTK	5	6	1	P04104		0		0	0.013	4.35081	2	1475.79	0.0858454	51.5301	0
	High	TNAENEFVTIK	3	1	1	P04104		0		0	0.09854	3.00097	2	1265.64	0.380529	54.9038	0
	High	TNAENEFVTIKK	1	1	1	P04104		0		0	0.1204	2.50663	3	1393.73	-0.0577216	40.3405	1
Q9Z1R9	MCG124046 OS=Mus musculus GN=Prss1 PE=1 SV=1 - [Q9Z1R9_MOUSE]	28.2414	8.13	1	1	1	8	246	26.1178	4.94482
	A2	Sequence	# PSMs	# Proteins	# Protein Groups	Protein Group Accessions	Modifications	ΔCn	phosphoRS Site Probabilities	q-Value	PEP	XCorr	Charge	MH+ [Da]	ΔM [ppm]	RT [min]	# Missed Cleavages
	High	LGEHNINVLEGNEQFIDAAK	8	1	1	Q9Z1R9		0		0	0.03569	4.21864	3	2211.1	0.339763	78.8637	0
B2RTP7	Krt2 protein OS=Mus musculus GN=Krt2 PE=2 SV=1 - [B2RTP7_MOUSE]	24.4122	6.22	7	4	5	8	707	70.8798	8.06006
	A2	Sequence	# PSMs	# Proteins	# Protein Groups	Protein Group Accessions	Modifications	ΔCn	phosphoRS Site Probabilities	q-Value	PEP	XCorr	Charge	MH+ [Da]	ΔM [ppm]	RT [min]	# Missed Cleavages
	High	GFSSGSAVVSGGSR	1	2	1	B2RTP7		0		0	0.008362	4.46066	2	1254.61	-0.213642	32.056	0
	High	KYEDEINKR	1	2	1	B2RTP7		0		0	0.08318	3.32774	2	1194.61	-0.405034	17.744	2
	High	KLLEGEEcR	2	22	5	P50446;Q99MH7;Q3UV17;Q922U2;B2RTP7	C8(Carbamidomethyl)	0		0	0.1276	3.02859	3	1133.56	-0.816887	21.52	1
	High	DYQELMNTK	2	3	1	B2RTP7		0		0	0.1357	2.49098	2	1141.52	0.0135595	47.8291	0
	High	DYQELmNTK	1	3	1	B2RTP7	M6(Oxidation)	0		0.001	0.2007	2.50383	2	1157.51	0.082587	28.6229	0
	High	LLRDYQELMNTK	1	3	1	B2RTP7		0		0.002	0.2616	2.92067	3	1523.79	-0.0810129	60.6164	1
Q6IFX2	Keratin, type I cytoskeletal 42 OS=Mus musculus GN=Krt42 PE=1 SV=1 - [K1C42_MOUSE]	24.2137	9.07	6	2	5	8	452	50.1019	5.16064
	A2	Sequence	# PSMs	# Proteins	# Protein Groups	Protein Group Accessions	Modifications	ΔCn	phosphoRS Site Probabilities	q-Value	PEP	XCorr	Charge	MH+ [Da]	ΔM [ppm]	RT [min]	# Missed Cleavages
	High	ALEEANADLEVK	2	1	1	Q6IFX2		0		0	0.05123	3.61932	2	1301.66	0.626882	47.3753	0
	High	TRLEQEIATYR	2	13	4	Q61781;Q6IFX2;Q9Z2K1;Q61782		0		0	0.0553	3.24864	2	1379.73	-0.332515	48.1119	1
	High	LEQEIATYR	1	16	4	Q61781;Q6IFX2;Q9Z2K1;Q61782		0		0	0.1579	3.06656	2	1122.58	-0.411989	39.0611	0
	High	DAEEWFFTK	1	2	1	Q6IFX2		0		0	0.1227	2.83493	2	1172.53	0.108548	83.4524	0
	High	VLDELTLAR	2	6	2	Q61781;Q6IFX2		0		0	0.06115	2.72892	2	1029.59	-0.258132	66.6012	0
Q6KAP1	MFLJ00246 protein (Fragment) OS=Mus musculus GN=mFLJ00246 PE=4 SV=1 - [Q6KAP1_MOUSE]	20.0275	4.33	14	7	7	7	1454	153.823	5.04639
	A2	Sequence	# PSMs	# Proteins	# Protein Groups	Protein Group Accessions	Modifications	ΔCn	phosphoRS Site Probabilities	q-Value	PEP	XCorr	Charge	MH+ [Da]	ΔM [ppm]	RT [min]	# Missed Cleavages
	High	NTALTLAcFQGR	1	12	1	Q6KAP1	C8(Carbamidomethyl)	0		0	0.01784	4.26113	2	1351.68	1.62797	71.2234	0
	High	GADVNAPPVPSSR	1	12	1	Q6KAP1		0		0	0.04211	3.28912	2	1266.64	-0.125539	35.4261	0
	High	DTPLSLAcSGGR	1	13	1	Q6KAP1	C8(Carbamidomethyl)	0		0	0.06883	3.03931	2	1233.59	0.40044	54.7702	0
	High	TKDTPLSLAcSGGR	1	13	1	Q6KAP1	C10(Carbamidomethyl)	0		0	0.05659	2.86536	2	1462.73	0.70584	41.9677	1
	High	ESALTLAcYK	1	10	1	Q6KAP1	C8(Carbamidomethyl)	0		0	0.1774	2.39945	2	1155.57	0.408207	57.0613	0
	High	KLLDEGR	1	4	1	Q6KAP1		0		0.001	0.2114	2.12216	2	830.472	-0.760521	20.1065	1
	High	NASILLK	1	5	1	Q6KAP1		0		0.002	0.2341	2.05093	2	758.477	-0.164791	41.1277	0
Q9Z2K1	Keratin, type I cytoskeletal 16 OS=Mus musculus GN=Krt16 PE=1 SV=3 - [K1C16_MOUSE]	20.0014	6.4	10	1	4	7	469	51.5743	5.19873
	A2	Sequence	# PSMs	# Proteins	# Protein Groups	Protein Group Accessions	Modifications	ΔCn	phosphoRS Site Probabilities	q-Value	PEP	XCorr	Charge	MH+ [Da]	ΔM [ppm]	RT [min]	# Missed Cleavages
	High	TRLEQEIATYR	2	13	4	Q61781;Q6IFX2;Q9Z2K1;Q61782		0		0	0.0553	3.24864	2	1379.73	-0.332515	48.1119	1
	High	LEQEIATYR	1	16	4	Q61781;Q6IFX2;Q9Z2K1;Q61782		0		0	0.1579	3.06656	2	1122.58	-0.411989	39.0611	0
	High	VTMQNLNDR	2	14	3	P02535-3;Q61781;Q9Z2K1		0		0	0.06831	2.84774	2	1090.53	-0.530195	30.9901	0
	High	NHEEEMLALR	1	4	1	Q9Z2K1		0		0	0.1169	2.6693	2	1241.59	0.0375729	45.7867	0
	High	VTmQNLNDR	1	14	3	P02535-3;Q61781;Q9Z2K1	M3(Oxidation)	0		0	0.05952	2.64759	2	1106.53	-0.339808	18.4977	0
P50446	Keratin, type II cytoskeletal 6A OS=Mus musculus GN=Krt6a PE=1 SV=3 - [K2C6A_MOUSE]	19.7174	7.78	14	1	5	7	553	59.2986	7.94287
	A2	Sequence	# PSMs	# Proteins	# Protein Groups	Protein Group Accessions	Modifications	ΔCn	phosphoRS Site Probabilities	q-Value	PEP	XCorr	Charge	MH+ [Da]	ΔM [ppm]	RT [min]	# Missed Cleavages
	High	YEELQVTAGR	2	9	2	P50446;Q99MH7		0		0	0.03332	3.18745	2	1165.58	-0.153549	41.5966	0
	High	AEAESWYQTK	1	12	2	P50446;Q99MH7		0		0	0.04686	3.12818	2	1212.55	-0.631344	38.7173	0
	High	KLLEGEEcR	2	22	5	P50446;Q99MH7;Q3UV17;Q922U2;B2RTP7	C8(Carbamidomethyl)	0		0	0.1276	3.02859	3	1133.56	-0.816887	21.52	1
	High	TAAENEFVTLKK	1	1	1	P50446		0		0	0.08747	2.62731	2	1350.73	-0.312094	42.8493	1
	High	SRAEAESWYQTK	1	12	2	P50446;Q99MH7		0		0.001	0.1897	2.86081	2	1455.69	1.00326	32.3254	1
Q99MH7	Cytokeratin KRT2-6HF (Fragment) OS=Mus musculus GN=Krt75 PE=2 SV=1 - [Q99MH7_MOUSE]	19.4227	10.76	15	1	5	7	381	42.3572	5.19873
	A2	Sequence	# PSMs	# Proteins	# Protein Groups	Protein Group Accessions	Modifications	ΔCn	phosphoRS Site Probabilities	q-Value	PEP	XCorr	Charge	MH+ [Da]	ΔM [ppm]	RT [min]	# Missed Cleavages
	High	YEELQVTAGR	2	9	2	P50446;Q99MH7		0		0	0.03332	3.18745	2	1165.58	-0.153549	41.5966	0
	High	AEAESWYQTK	1	12	2	P50446;Q99MH7		0		0	0.04686	3.12818	2	1212.55	-0.631344	38.7173	0
	High	KLLEGEEcR	2	22	5	P50446;Q99MH7;Q3UV17;Q922U2;B2RTP7	C8(Carbamidomethyl)	0		0	0.1276	3.02859	3	1133.56	-0.816887	21.52	1
	High	SRAEAESWYQTK	1	12	2	P50446;Q99MH7		0		0.001	0.1897	2.86081	2	1455.69	1.00326	32.3254	1
	High	NMQEVVEDFK	1	2	1	Q99MH7		0		0.002	0.2653	2.33258	2	1238.57	0.164701	80.8482	0
Q6P4T2	U5 small nuclear ribonucleoprotein 200 kDa helicase OS=Mus musculus GN=Snrnp200 PE=1 SV=1 - [U520_MOUSE]	18.3803	0.89	2	2	2	6	2136	244.392	6.06201
	A2	Sequence	# PSMs	# Proteins	# Protein Groups	Protein Group Accessions	Modifications	ΔCn	phosphoRS Site Probabilities	q-Value	PEP	XCorr	Charge	MH+ [Da]	ΔM [ppm]	RT [min]	# Missed Cleavages
	High	GPVLEALVAR	5	2	1	Q6P4T2		0		0	0.03292	3.87557	2	1024.62	0.611824	76.4777	0
	High	ESIEEPSAK	1	1	1	Q6P4T2		0		0	0.1206	2.19811	2	989.479	0.671409	22.5162	0
Q02257	Junction plakoglobin OS=Mus musculus GN=Jup PE=1 SV=3 - [PLAK_MOUSE]	16.902	8.99	1	5	5	5	745	81.7488	6.13818
	A2	Sequence	# PSMs	# Proteins	# Protein Groups	Protein Group Accessions	Modifications	ΔCn	phosphoRS Site Probabilities	q-Value	PEP	XCorr	Charge	MH+ [Da]	ΔM [ppm]	RT [min]	# Missed Cleavages
	High	HVAAGTQQPYTDGVR	1	1	1	Q02257		0		0	0.007717	4.40306	2	1599.79	0.426454	26.0714	0
	High	AGDKDDITEPAVcALR	1	1	1	Q02257	C13(Carbamidomethyl)	0		0	0.03059	3.97404	2	1730.84	-0.0341722	53.4601	1
	High	ISEDKNPDYR	1	1	1	Q02257		0		0	0.1298	2.97867	2	1236.59	-0.142774	18.3519	1
	High	TMQNTSDLDTAR	1	1	1	Q02257		0		0	0.165	2.80358	2	1352.61	2.52714	27.2034	0
	High	ALMGSPQLVAAVVR	1	1	1	Q02257		0		0	0.01916	2.74266	2	1411.81	0.0413158	83.8439	0
Q61782	Type I epidermal keratin mRNA, 3'end (Fragment) OS=Mus musculus PE=2 SV=1 - [Q61782_MOUSE]	16.792	47.31	4	1	4	5	93	10.6554	6.30322
	A2	Sequence	# PSMs	# Proteins	# Protein Groups	Protein Group Accessions	Modifications	ΔCn	phosphoRS Site Probabilities	q-Value	PEP	XCorr	Charge	MH+ [Da]	ΔM [ppm]	RT [min]	# Missed Cleavages
	High	cEMEQQNQEYK	1	3	2	Q61781;Q61782	C1(Carbamidomethyl)	0		0	0.01423	4.03877	2	1486.59	0.439024	21.2579	0
	High	LLEGEDAHLSSSQFSSGSQSSR	1	1	1	Q61782		0		0	0.001628	3.58573	3	2309.07	0.559319	49.6105	0
	High	TRLEQEIATYR	2	13	4	Q61781;Q6IFX2;Q9Z2K1;Q61782		0		0	0.0553	3.24864	2	1379.73	-0.332515	48.1119	1
	High	LEQEIATYR	1	16	4	Q61781;Q6IFX2;Q9Z2K1;Q61782		0		0	0.1579	3.06656	2	1122.58	-0.411989	39.0611	0
P10126	Elongation factor 1-alpha 1 OS=Mus musculus GN=Eef1a1 PE=1 SV=3 - [EF1A1_MOUSE]	16.3859	6.71	7	3	3	6	462	50.0821	9.01221
	A2	Sequence	# PSMs	# Proteins	# Protein Groups	Protein Group Accessions	Modifications	ΔCn	phosphoRS Site Probabilities	q-Value	PEP	XCorr	Charge	MH+ [Da]	ΔM [ppm]	RT [min]	# Missed Cleavages
	High	YYVTIIDAPGHR	3	6	1	P10126		0		0	0.06684	3.20614	2	1404.73	0.287096	61.8479	0
	High	IGGIGTVPVGR	1	5	1	P10126		0		0	0.01372	2.81643	2	1025.61	-0.113376	54.1222	0
	High	LPLQDVYK	2	5	1	P10126		0		0.001	0.2257	2.37863	2	975.551	-0.041393	57.6836	0
Q3URH5	Uncharacterized protein (Fragment) OS=Mus musculus GN=Smarca4 PE=2 SV=1 - [Q3URH5_MOUSE]	16.2821	3.33	23	5	5	6	1261	142.828	8.6167
	A2	Sequence	# PSMs	# Proteins	# Protein Groups	Protein Group Accessions	Modifications	ΔCn	phosphoRS Site Probabilities	q-Value	PEP	XCorr	Charge	MH+ [Da]	ΔM [ppm]	RT [min]	# Missed Cleavages
	High	VIQAGMFDQK	1	18	1	Q3URH5		0		0	0.1632	2.88163	2	1136.58	0.134321	51.5062	0
	High	VIQAGmFDQK	1	18	1	Q3URH5	M6(Oxidation)	0		0	0.1158	2.85308	2	1152.57	0.413791	37.3398	0
	High	LMAEDEEGYR	1	16	1	Q3URH5		0		0	0.1411	2.80324	2	1212.52	-0.303756	33.0286	0
	High	LMAEDEEGYRK	1	16	1	Q3URH5		0		0	0.1077	2.76053	2	1340.61	-0.183153	24.5523	1
	High	GVLLTDGSEK	1	7	1	Q3URH5		0		0	0.09556	2.32857	2	1018.54	-0.199207	37.3477	0
	High	LLLTGTPLQNK	1	14	1	Q3URH5		0		0.001	0.1855	2.65502	2	1197.72	0.662562	69.1496	0
Q792Z1	MCG140784 OS=Mus musculus GN=Try10 PE=1 SV=1 - [Q792Z1_MOUSE]	14.9112	4.07	2	1	1	6	246	26.2039	5.8335
	A2	Sequence	# PSMs	# Proteins	# Protein Groups	Protein Group Accessions	Modifications	ΔCn	phosphoRS Site Probabilities	q-Value	PEP	XCorr	Charge	MH+ [Da]	ΔM [ppm]	RT [min]	# Missed Cleavages
	High	TLDNDIMLIK	2	2	1	Q792Z1		0		0	0.0505	3.03211	2	1175.63	0.397898	79.489	0
	High	TLDNDImLIK	4	2	1	Q792Z1	M7(Oxidation)	0		0	0.09091	2.95541	2	1191.63	0.562231	70.2518	0
E9Q557	Desmoplakin OS=Mus musculus GN=Dsp PE=1 SV=1 - [DESP_MOUSE]	14.1921	1.77	3	5	5	5	2883	332.706	6.80029
	A2	Sequence	# PSMs	# Proteins	# Protein Groups	Protein Group Accessions	Modifications	ΔCn	phosphoRS Site Probabilities	q-Value	PEP	XCorr	Charge	MH+ [Da]	ΔM [ppm]	RT [min]	# Missed Cleavages
	High	LNDSILQATEQR	1	1	1	E9Q557		0		0	0.03126	3.51608	2	1387.72	-0.22234	58.2953	0
	High	SQLQISNNR	1	2	1	E9Q557		0		0	0.109	2.97231	2	1059.55	-0.168583	25.2385	0
	High	LTYEIEDEKR	1	2	1	E9Q557		0		0	0.133	2.82123	2	1295.65	-0.335611	35.3858	1
	High	NKYETEINITK	1	1	1	E9Q557		0		0	0.1357	2.56502	2	1352.71	-0.305688	38.3823	1
	High	IEVLEEELR	1	2	1	E9Q557		0		0	0.07685	2.31744	2	1129.61	0.253	67.5866	0
Q9D423	La ribonucleoprotein domain family, member 1B OS=Mus musculus GN=Larp1b PE=2 SV=1 - [Q9D423_MOUSE]	10.7425	8.87	4	2	2	3	248	29.1122	8.20654
	A2	Sequence	# PSMs	# Proteins	# Protein Groups	Protein Group Accessions	Modifications	ΔCn	phosphoRS Site Probabilities	q-Value	PEP	XCorr	Charge	MH+ [Da]	ΔM [ppm]	RT [min]	# Missed Cleavages
	High	LGIGQSQEMNTLFR	1	3	1	Q9D423		0		0	0.007897	3.85852	2	1593.81	0.329088	82.0797	0
	High	LGIGQSQEmNTLFR	1	3	1	Q9D423	M9(Oxidation)	0		0	0.02727	3.68392	2	1609.8	-0.15522	69.1776	0
	High	YGLEcLFR	1	4	1	Q9D423	C5(Carbamidomethyl)	0		0	0.06807	3.20006	2	1057.51	0.145789	83.5082	0
Q3UV17	Keratin, type II cytoskeletal 2 oral OS=Mus musculus GN=Krt76 PE=1 SV=1 - [K22O_MOUSE]	10.4797	3.03	5	1	2	4	594	62.806	8.42627
	A2	Sequence	# PSMs	# Proteins	# Protein Groups	Protein Group Accessions	Modifications	ΔCn	phosphoRS Site Probabilities	q-Value	PEP	XCorr	Charge	MH+ [Da]	ΔM [ppm]	RT [min]	# Missed Cleavages
	High	KLLEGEEcR	2	22	5	P50446;Q99MH7;Q3UV17;Q922U2;B2RTP7	C8(Carbamidomethyl)	0		0	0.1276	3.02859	3	1133.56	-0.816887	21.52	1
	High	AQYEDIAQK	2	1	1	Q3UV17		0		0	0.1464	2.44412	2	1065.52	0.128137	26.9577	0
P07724	Serum albumin OS=Mus musculus GN=Alb PE=1 SV=3 - [ALBU_MOUSE]	10.3694	4.44	1	2	2	3	608	68.6477	6.07471
	A2	Sequence	# PSMs	# Proteins	# Protein Groups	Protein Group Accessions	Modifications	ΔCn	phosphoRS Site Probabilities	q-Value	PEP	XCorr	Charge	MH+ [Da]	ΔM [ppm]	RT [min]	# Missed Cleavages
	High	LGEYGFQNAILVR	1	1	1	P07724		0		0	0.005094	4.48978	2	1479.8	0.218048	83.2203	0
	High	EccHGDLLEcADDR	2	1	1	P07724	C2(Carbamidomethyl); C3(Carbamidomethyl); C10(Carbamidomethyl)	0		0	0.007567	3.5091	2	1749.66	0.506639	38.44	0
Q3U804	Uncharacterized protein OS=Mus musculus GN=Actb PE=2 SV=1 - [Q3U804_MOUSE]	10.1773	13.37	47	4	4	4	374	41.7729	6.30322
	A2	Sequence	# PSMs	# Proteins	# Protein Groups	Protein Group Accessions	Modifications	ΔCn	phosphoRS Site Probabilities	q-Value	PEP	XCorr	Charge	MH+ [Da]	ΔM [ppm]	RT [min]	# Missed Cleavages
	High	DSYVGDEAQSK	1	40	1	Q3U804		0		0	0.07097	2.81345	2	1198.52	0.291448	22.0296	0
	High	VAPEEHPVLLTEAPLNPK	1	21	1	Q3U804		0		0	0.05452	2.79482	2	1954.06	0.249585	70.8402	0
	High	GYSFTTTAER	1	22	1	Q3U804		0		0	0.07155	2.48763	2	1132.53	-0.26699	39.9888	0
	High	EITALAPSTMK	1	30	1	Q3U804		0		0.002	0.2301	2.08143	2	1161.62	-0.206297	54.6782	0
Q6IME9	Keratin, type II cytoskeletal 72 OS=Mus musculus GN=Krt72 PE=3 SV=1 - [K2C72_MOUSE]	9.94197	2.31	1	1	1	3	520	56.7149	7.40088
	A2	Sequence	# PSMs	# Proteins	# Protein Groups	Protein Group Accessions	Modifications	ΔCn	phosphoRS Site Probabilities	q-Value	PEP	XCorr	Charge	MH+ [Da]	ΔM [ppm]	RT [min]	# Missed Cleavages
	High	FLEQQNQVLETK	3	1	1	Q6IME9		0		0	0.09585	3.66256	2	1476.77	0.243517	52.9381	0
B7ZWL1	CCR4-NOT transcription complex subunit 1 OS=Mus musculus GN=Cnot1 PE=1 SV=1 - [B7ZWL1_MOUSE]	8.19122	1.5	10	3	3	3	2326	260.791	7.02002
	A2	Sequence	# PSMs	# Proteins	# Protein Groups	Protein Group Accessions	Modifications	ΔCn	phosphoRS Site Probabilities	q-Value	PEP	XCorr	Charge	MH+ [Da]	ΔM [ppm]	RT [min]	# Missed Cleavages
	High	GQQELLYVVPFVAK	1	9	1	B7ZWL1		0		0	0.1032	3.12276	2	1590.89	0.546158	86.7321	0
	High	NLILSAFPR	1	7	1	B7ZWL1		0		0	0.1292	2.63764	2	1030.6	-0.259775	82.9342	0
	High	NLTAGMAMITcR	1	7	1	B7ZWL1	C11(Carbamidomethyl)	0		0	0.1145	2.43082	2	1338.63	-0.560044	72.2904	0
Q80VC9-9	Isoform 9 of Calmodulin-regulated spectrin-associated protein 3 OS=Mus musculus GN=Camsap3 - [CAMP3_MOUSE]	7.32826	2.15	17	1	2	3	836	91.4048	8.33838
	A2	Sequence	# PSMs	# Proteins	# Protein Groups	Protein Group Accessions	Modifications	ΔCn	phosphoRS Site Probabilities	q-Value	PEP	XCorr	Charge	MH+ [Da]	ΔM [ppm]	RT [min]	# Missed Cleavages
	High	LLLSAELYcR	1	17	1	Q80VC9-9	C9(Carbamidomethyl)	0		0	0.1217	2.69215	2	1237.66	-0.417975	79.8774	0
	High	LYKEPSAK	2	23	2	Q80VC9-9;A0A0A6YY67		0		0.001	0.2298	2.3215	2	935.519	-0.38117	17.575	1
Q6ZQB6-2	Isoform 2 of Inositol hexakisphosphate and diphosphoinositol-pentakisphosphate kinase 2 OS=Mus musculus GN=Ppip5k2 - [VIP2_MOUSE]	5.94421	2.27	11	2	2	2	1058	121.104	6.68311
	A2	Sequence	# PSMs	# Proteins	# Protein Groups	Protein Group Accessions	Modifications	ΔCn	phosphoRS Site Probabilities	q-Value	PEP	XCorr	Charge	MH+ [Da]	ΔM [ppm]	RT [min]	# Missed Cleavages
	High	VYTVGPDYAHAEAR	1	10	1	Q6ZQB6-2		0		0	0.02085	3.12012	2	1548.74	-0.153167	39.7169	0
	High	WGGELTPAGR	1	5	1	Q6ZQB6-2		0		0	0.07849	2.82409	2	1043.53	0.0899237	45.7666	0
Q3UHC8	Uncharacterized protein OS=Mus musculus GN=Acacb PE=2 SV=1 - [Q3UHC8_MOUSE]	5.90599	0.75	4	1	1	2	1742	197.828	6.31592
	A2	Sequence	# PSMs	# Proteins	# Protein Groups	Protein Group Accessions	Modifications	ΔCn	phosphoRS Site Probabilities	q-Value	PEP	XCorr	Charge	MH+ [Da]	ΔM [ppm]	RT [min]	# Missed Cleavages
	High	EASFEYLQNEGER	2	4	1	Q3UHC8		0		0	0.09896	3.23551	2	1571.7	1.56094	56.9042	0
Q3UUN4	Kinesin-like protein (Fragment) OS=Mus musculus GN=Kif1a PE=2 SV=1 - [Q3UUN4_MOUSE]	5.56803	3.74	23	1	1	2	294	32.7261	7.40088
	A2	Sequence	# PSMs	# Proteins	# Protein Groups	Protein Group Accessions	Modifications	ΔCn	phosphoRS Site Probabilities	q-Value	PEP	XCorr	Charge	MH+ [Da]	ΔM [ppm]	RT [min]	# Missed Cleavages
	High	ISLVDLAGSER	2	23	1	Q3UUN4		0		0	0.04785	2.94558	2	1159.63	-0.341527	78.4313	0
B9EIU1	Glutamyl-prolyl-tRNA synthetase OS=Mus musculus GN=Eprs PE=2 SV=1 - [B9EIU1_MOUSE]	5.18605	1.06	2	1	1	1	1512	169.856	7.59131
	A2	Sequence	# PSMs	# Proteins	# Protein Groups	Protein Group Accessions	Modifications	ΔCn	phosphoRS Site Probabilities	q-Value	PEP	XCorr	Charge	MH+ [Da]	ΔM [ppm]	RT [min]	# Missed Cleavages
	High	AIQGATSHHLGQNFSK	1	2	1	B9EIU1		0		0	0.001243	5.18605	2	1695.86	-0.259934	26.3448	0
P62806	Histone H4 OS=Mus musculus GN=Hist1h4a PE=1 SV=2 - [H4_MOUSE]	4.88795	21.36	2	2	2	2	103	11.3604	11.356
	A2	Sequence	# PSMs	# Proteins	# Protein Groups	Protein Group Accessions	Modifications	ΔCn	phosphoRS Site Probabilities	q-Value	PEP	XCorr	Charge	MH+ [Da]	ΔM [ppm]	RT [min]	# Missed Cleavages
	High	DNIQGITKPAIR	1	1	1	P62806		0		0	0.1138	2.09486	2	1325.75	0.696132	43.0091	0
	High	DAVTYTEHAK	1	2	1	P62806		0		0.001	0.1908	2.79308	2	1134.54	-0.718928	20.8035	0
Q99KH3	Annexin OS=Mus musculus GN=Anxa2 PE=2 SV=1 - [Q99KH3_MOUSE]	4.41809	9.46	7	2	2	2	222	25.8612	7.69385
	A2	Sequence	# PSMs	# Proteins	# Protein Groups	Protein Group Accessions	Modifications	ΔCn	phosphoRS Site Probabilities	q-Value	PEP	XCorr	Charge	MH+ [Da]	ΔM [ppm]	RT [min]	# Missed Cleavages
	High	TNQELQEINR	1	6	1	Q99KH3		0		0	0.1431	2.14439	2	1244.62	-1.004	31.963	0
	High	SLYYYIQQDTK	1	5	1	Q99KH3		0		0.001	0.1959	2.2737	2	1421.69	0.098838	67.5025	0
A1L0X5	Krt78 protein (Fragment) OS=Mus musculus GN=Krt78 PE=2 SV=1 - [A1L0X5_MOUSE]	3.79108	2.44	5	1	1	1	492	54.7393	6.30322
	A2	Sequence	# PSMs	# Proteins	# Protein Groups	Protein Group Accessions	Modifications	ΔCn	phosphoRS Site Probabilities	q-Value	PEP	XCorr	Charge	MH+ [Da]	ΔM [ppm]	RT [min]	# Missed Cleavages
	High	SLNNQFASFIDK	1	5	1	A1L0X5		0		0	0.01555	3.79108	2	1383.69	0.348486	81.4529	0
Q6PB69	Tln2 protein (Fragment) OS=Mus musculus GN=Tln2 PE=2 SV=1 - [Q6PB69_MOUSE]	3.20505	2.08	16	1	1	1	529	55.9904	5.99854
	A2	Sequence	# PSMs	# Proteins	# Protein Groups	Protein Group Accessions	Modifications	ΔCn	phosphoRS Site Probabilities	q-Value	PEP	XCorr	Charge	MH+ [Da]	ΔM [ppm]	RT [min]	# Missed Cleavages
	High	VMVTNVTSLLK	1	16	1	Q6PB69		0		0	0.03183	3.20505	2	1204.7	0.132692	82.862	0
Q4FE56	Probable ubiquitin carboxyl-terminal hydrolase FAF-X OS=Mus musculus GN=Usp9x PE=1 SV=1 - [Q4FE56_MOUSE]	3.18716	0.35	4	1	1	1	2554	290.031	5.8335
	A2	Sequence	# PSMs	# Proteins	# Protein Groups	Protein Group Accessions	Modifications	ΔCn	phosphoRS Site Probabilities	q-Value	PEP	XCorr	Charge	MH+ [Da]	ΔM [ppm]	RT [min]	# Missed Cleavages
	High	FNDYFEFPR	1	4	1	Q4FE56		0		0	0.05708	3.18716	2	1234.55	-0.106433	82.797	0
Q9D6H0	Uncharacterized protein OS=Mus musculus GN=Top1mt PE=2 SV=1 - [Q9D6H0_MOUSE]	3.11672	3.39	3	1	1	1	295	33.8657	9.0415
	A2	Sequence	# PSMs	# Proteins	# Protein Groups	Protein Group Accessions	Modifications	ΔCn	phosphoRS Site Probabilities	q-Value	PEP	XCorr	Charge	MH+ [Da]	ΔM [ppm]	RT [min]	# Missed Cleavages
	High	AVAVLcNHQR	1	3	1	Q9D6H0	C6(Carbamidomethyl)	0		0	0.1613	3.11672	2	1167.6	-0.23921	23.4906	0
G3X956	Suppressor of Ty 16 OS=Mus musculus GN=Supt16 PE=1 SV=1 - [G3X956_MOUSE]	3.0042	1.15	2	1	1	1	1047	119.763	5.65576
	A2	Sequence	# PSMs	# Proteins	# Protein Groups	Protein Group Accessions	Modifications	ΔCn	phosphoRS Site Probabilities	q-Value	PEP	XCorr	Charge	MH+ [Da]	ΔM [ppm]	RT [min]	# Missed Cleavages
	High	GDKVDILYNNIK	1	2	1	G3X956		0		0	0.1062	3.0042	2	1391.75	-0.0762233	56.7663	1
A0A087WQ37	RIKEN cDNA 2410004P03 gene (Fragment) OS=Mus musculus GN=2410004P03Rik PE=4 SV=1 - [A0A087WQ37_MOUSE]	2.8022	24.58	3	1	1	1	118	12.7444	8.52881
	A2	Sequence	# PSMs	# Proteins	# Protein Groups	Protein Group Accessions	Modifications	ΔCn	phosphoRS Site Probabilities	q-Value	PEP	XCorr	Charge	MH+ [Da]	ΔM [ppm]	RT [min]	# Missed Cleavages
	High	TTSAGYKPPPTRQLAsIsAALGDGPAASR	1	3	1	A0A087WQ37	S16(Phospho); S18(Phospho)	0	T(1): 0.0; T(2): 0.0; S(3): 0.0; Y(6): 0.0; T(11): 89.8; S(16): 54.9; S(18): 55.0; S(28): 0.1	0	0.1305	2.8022	4	3001.42	0.0707555	27.8553	1
D3Z6F5	ATP synthase subunit alpha OS=Mus musculus GN=Atp5a1 PE=1 SV=1 - [D3Z6F5_MOUSE]	2.79376	2.58	2	1	1	1	503	54.5607	8.23584
	A2	Sequence	# PSMs	# Proteins	# Protein Groups	Protein Group Accessions	Modifications	ΔCn	phosphoRS Site Probabilities	q-Value	PEP	XCorr	Charge	MH+ [Da]	ΔM [ppm]	RT [min]	# Missed Cleavages
	High	EAYPGDVFYLHSR	1	2	1	D3Z6F5		0		0	0.01502	2.79376	2	1553.74	0.293376	68.5937	0
F7BB92	ATP-dependent Clp protease ATP-binding subunit clpX-like, mitochondrial (Fragment) OS=Mus musculus GN=Clpx PE=1 SV=1 - [F7BB92_MOUSE]	2.78498	6.77	3	1	1	1	192	20.9468	5.90967
	A2	Sequence	# PSMs	# Proteins	# Protein Groups	Protein Group Accessions	Modifications	ΔCn	phosphoRS Site Probabilities	q-Value	PEP	XCorr	Charge	MH+ [Da]	ΔM [ppm]	RT [min]	# Missed Cleavages
	High	SNILLLGPTGSGK	1	3	1	F7BB92		0		0	0.07385	2.78498	2	1256.72	-0.151646	70.8321	0
Q5PR73	GTP-binding protein Di-Ras2 OS=Mus musculus GN=Diras2 PE=1 SV=1 - [DIRA2_MOUSE]	2.77608	5.53	1	1	1	1	199	22.4836	8.76318
	A2	Sequence	# PSMs	# Proteins	# Protein Groups	Protein Group Accessions	Modifications	ΔCn	phosphoRS Site Probabilities	q-Value	PEP	XCorr	Charge	MH+ [Da]	ΔM [ppm]	RT [min]	# Missed Cleavages
	High	VAVFGAGGVGK	1	1	1	Q5PR73		0		0	0.04146	2.77608	2	961.546	-0.120584	61.0802	0
Q3ULF5	Uncharacterized protein (Fragment) OS=Mus musculus GN=Top1 PE=2 SV=1 - [Q3ULF5_MOUSE]	2.70584	3.09	2	1	1	1	291	35.1141	9.33447
	A2	Sequence	# PSMs	# Proteins	# Protein Groups	Protein Group Accessions	Modifications	ΔCn	phosphoRS Site Probabilities	q-Value	PEP	XCorr	Charge	MH+ [Da]	ΔM [ppm]	RT [min]	# Missed Cleavages
	High	MLDHEYTTK	1	2	1	Q3ULF5		0		0	0.1317	2.70584	2	1137.52	0.0548837	22.3843	0
A0A0B4J1N9	E3 ubiquitin-protein ligase TRIP12 (Fragment) OS=Mus musculus GN=Trip12 PE=1 SV=5 - [A0A0B4J1N9_MOUSE]	2.7043	0.81	3	1	1	1	982	106.392	9.21729
	A2	Sequence	# PSMs	# Proteins	# Protein Groups	Protein Group Accessions	Modifications	ΔCn	phosphoRS Site Probabilities	q-Value	PEP	XCorr	Charge	MH+ [Da]	ΔM [ppm]	RT [min]	# Missed Cleavages
	High	LQALLEAR	1	3	1	A0A0B4J1N9		0		0	0.1766	2.7043	2	913.547	-0.0382161	52.0612	0
Q3TS63	Uncharacterized protein (Fragment) OS=Mus musculus GN=Asap2 PE=2 SV=1 - [Q3TS63_MOUSE]	2.69845	1.43	7	1	1	1	559	61.7079	5.61768
	A2	Sequence	# PSMs	# Proteins	# Protein Groups	Protein Group Accessions	Modifications	ΔCn	phosphoRS Site Probabilities	q-Value	PEP	XCorr	Charge	MH+ [Da]	ΔM [ppm]	RT [min]	# Missed Cleavages
	High	EIISEVQR	1	7	1	Q3TS63		0		0.001	0.2294	2.69845	2	973.531	-0.160007	49.1324	0
Q8C196	Carbamoyl-phosphate synthase [ammonia], mitochondrial OS=Mus musculus GN=Cps1 PE=1 SV=2 - [CPSM_MOUSE]	2.65551	0.67	1	1	1	1	1500	164.514	6.91748
	A2	Sequence	# PSMs	# Proteins	# Protein Groups	Protein Group Accessions	Modifications	ΔCn	phosphoRS Site Probabilities	q-Value	PEP	XCorr	Charge	MH+ [Da]	ΔM [ppm]	RT [min]	# Missed Cleavages
	High	SVGEVMAIGR	1	1	1	Q8C196		0		0	0.104	2.65551	2	1018.53	-0.698988	52.9141	0
O89029-2	Isoform Short of Matrilin-4 OS=Mus musculus GN=Matn4 - [MATN4_MOUSE]	2.65445	2.76	5	1	1	1	434	47.9131	5.68115
	A2	Sequence	# PSMs	# Proteins	# Protein Groups	Protein Group Accessions	Modifications	ΔCn	phosphoRS Site Probabilities	q-Value	PEP	XCorr	Charge	MH+ [Da]	ΔM [ppm]	RT [min]	# Missed Cleavages
	High	LEELENQLASRK	1	5	1	O89029-2		0		0.001	0.1855	2.65445	2	1429.76	0.06626	35.8046	1
Q99LC5	Electron transfer flavoprotein subunit alpha, mitochondrial OS=Mus musculus GN=Etfa PE=1 SV=2 - [ETFA_MOUSE]	2.61453	5.71	1	1	1	1	333	34.9875	8.38232
	A2	Sequence	# PSMs	# Proteins	# Protein Groups	Protein Group Accessions	Modifications	ΔCn	phosphoRS Site Probabilities	q-Value	PEP	XCorr	Charge	MH+ [Da]	ΔM [ppm]	RT [min]	# Missed Cleavages
	High	AAVDAGFVPNDMQVGQTGK	1	1	1	Q99LC5		0		0	0.03377	2.61453	2	1904.92	-0.469278	69.8584	0
G3UWL7	Histone H2A OS=Mus musculus GN=H2afz PE=1 SV=1 - [G3UWL7_MOUSE]	2.59429	10.34	17	1	1	1	87	9.11288	10.7847
	A2	Sequence	# PSMs	# Proteins	# Protein Groups	Protein Group Accessions	Modifications	ΔCn	phosphoRS Site Probabilities	q-Value	PEP	XCorr	Charge	MH+ [Da]	ΔM [ppm]	RT [min]	# Missed Cleavages
	High	AGLQFPVGR	1	17	1	G3UWL7		0		0.008	0.294	2.59429	2	944.531	-0.370461	63.9534	0
P49025-3	Isoform 3 of Citron Rho-interacting kinase OS=Mus musculus GN=Cit - [CTRO_MOUSE]	2.55571	0.5	8	1	1	1	1597	183.335	6.60986
	A2	Sequence	# PSMs	# Proteins	# Protein Groups	Protein Group Accessions	Modifications	ΔCn	phosphoRS Site Probabilities	q-Value	PEP	XCorr	Charge	MH+ [Da]	ΔM [ppm]	RT [min]	# Missed Cleavages
	High	LIDFLQAK	1	8	1	P49025-3		0		0	0.07995	2.55571	2	947.556	-0.0785842	79.3376	0
Q6PET9	DNA topoisomerase 2 (Fragment) OS=Mus musculus GN=Top2a PE=2 SV=1 - [Q6PET9_MOUSE]	2.43224	2.32	5	1	1	1	345	39.5033	8.73389
	A2	Sequence	# PSMs	# Proteins	# Protein Groups	Protein Group Accessions	Modifications	ΔCn	phosphoRS Site Probabilities	q-Value	PEP	XCorr	Charge	MH+ [Da]	ΔM [ppm]	RT [min]	# Missed Cleavages
	High	LcNIFSTK	1	5	1	Q6PET9	C2(Carbamidomethyl)	0		0	0.1198	2.43224	2	982.503	-0.117313	56.7342	0
A2AGT5-2	Isoform 2 of Cytoskeleton-associated protein 5 OS=Mus musculus GN=Ckap5 - [CKAP5_MOUSE]	2.39966	0.46	6	1	1	1	1972	218.568	8.20654
	A2	Sequence	# PSMs	# Proteins	# Protein Groups	Protein Group Accessions	Modifications	ΔCn	phosphoRS Site Probabilities	q-Value	PEP	XCorr	Charge	MH+ [Da]	ΔM [ppm]	RT [min]	# Missed Cleavages
	High	DFYDKIEAK	1	6	1	A2AGT5-2		0		0.001	0.218	2.39966	2	1128.56	-0.571656	48.0226	1
E9PXX5	Mitogen-activated protein kinase 4 OS=Mus musculus GN=Mapk4 PE=1 SV=1 - [E9PXX5_MOUSE]	2.38612	4.15	32	1	1	1	193	21.6403	8.1626
	A2	Sequence	# PSMs	# Proteins	# Protein Groups	Protein Group Accessions	Modifications	ΔCn	phosphoRS Site Probabilities	q-Value	PEP	XCorr	Charge	MH+ [Da]	ΔM [ppm]	RT [min]	# Missed Cleavages
	High	IGDFGLAR	1	32	1	E9PXX5		0		0	0.1238	2.38612	2	848.463	-0.023952	57.2857	0
Q8VBV7	COP9 signalosome complex subunit 8 OS=Mus musculus GN=Cops8 PE=1 SV=1 - [CSN8_MOUSE]	2.27141	6.7	1	1	1	1	209	23.241	5.19873
	A2	Sequence	# PSMs	# Proteins	# Protein Groups	Protein Group Accessions	Modifications	ΔCn	phosphoRS Site Probabilities	q-Value	PEP	XCorr	Charge	MH+ [Da]	ΔM [ppm]	RT [min]	# Missed Cleavages
	High	MPVAVMADNAFSFR	1	1	1	Q8VBV7		0		0.008	0.2964	2.27141	2	1555.74	-1.18319	65.3768	0
Q9CPN9	RIKEN cDNA 2210010C04 gene OS=Mus musculus GN=2210010C04Rik PE=1 SV=1 - [Q9CPN9_MOUSE]	2.2375	4.86	2	1	1	1	247	26.405	7.92822
	A2	Sequence	# PSMs	# Proteins	# Protein Groups	Protein Group Accessions	Modifications	ΔCn	phosphoRS Site Probabilities	q-Value	PEP	XCorr	Charge	MH+ [Da]	ΔM [ppm]	RT [min]	# Missed Cleavages
	High	YVNWIQQTIAAN	1	2	1	Q9CPN9		0		0	0.1161	2.2375	2	1420.72	0.680421	86.1321	0
E9PVG8	RIKEN cDNA 9530053A07 gene OS=Mus musculus GN=9530053A07Rik PE=1 SV=1 - [E9PVG8_MOUSE]	2.2163	0.35	3	1	1	1	2581	280.044	6.17627
	A2	Sequence	# PSMs	# Proteins	# Protein Groups	Protein Group Accessions	Modifications	ΔCn	phosphoRS Site Probabilities	q-Value	PEP	XCorr	Charge	MH+ [Da]	ΔM [ppm]	RT [min]	# Missed Cleavages
	High	ISVINGGSK	1	3	1	E9PVG8		0		0	0.1606	2.2163	2	874.499	0.0158684	43.4081	0
B2RUG7	Zinc finger RNA binding protein OS=Mus musculus GN=Zfr PE=2 SV=1 - [B2RUG7_MOUSE]	2.2108	0.95	2	1	1	1	1052	114.383	9.0708
	A2	Sequence	# PSMs	# Proteins	# Protein Groups	Protein Group Accessions	Modifications	ΔCn	phosphoRS Site Probabilities	q-Value	PEP	XCorr	Charge	MH+ [Da]	ΔM [ppm]	RT [min]	# Missed Cleavages
	High	IScAGPQTYK	1	2	1	B2RUG7	C3(Carbamidomethyl)	0		0.002	0.2607	2.2108	2	1124.54	-0.0466215	24.7259	0
A0A087WP63	Predicted gene 42715 (Fragment) OS=Mus musculus GN=Gm42715 PE=1 SV=1 - [A0A087WP63_MOUSE]	2.15264	0.29	4	1	1	1	3095	331.337	5.5542
	A2	Sequence	# PSMs	# Proteins	# Protein Groups	Protein Group Accessions	Modifications	ΔCn	phosphoRS Site Probabilities	q-Value	PEP	XCorr	Charge	MH+ [Da]	ΔM [ppm]	RT [min]	# Missed Cleavages
	High	VLIFTQMTR	1	4	1	A0A087WP63		0		0	0.1698	2.15264	2	1108.62	0.287423	78.9777	0
A0A1B0GSR7	Keratin, type I cytoskeletal 10 OS=Mus musculus GN=Krt10 PE=4 SV=1 - [A0A1B0GSR7_MOUSE]	2.15072	10.31	1	1	1	1	97	9.26029	8.48486
	A2	Sequence	# PSMs	# Proteins	# Protein Groups	Protein Group Accessions	Modifications	ΔCn	phosphoRS Site Probabilities	q-Value	PEP	XCorr	Charge	MH+ [Da]	ΔM [ppm]	RT [min]	# Missed Cleavages
	High	SAETSWDTNK	1	1	1	A0A1B0GSR7		0		0.009	0.3019	2.15072	2	1138.5	0.209988	25.4122	0
P48678-3	Isoform C2 of Prelamin-A/C OS=Mus musculus GN=Lmna - [LMNA_MOUSE]	2.12269	2.81	3	1	1	1	462	52.6198	6.63916
	A2	Sequence	# PSMs	# Proteins	# Protein Groups	Protein Group Accessions	Modifications	ΔCn	phosphoRS Site Probabilities	q-Value	PEP	XCorr	Charge	MH+ [Da]	ΔM [ppm]	RT [min]	# Missed Cleavages
	High	IDSLSAQLSQLQK	1	3	1	P48678-3		0		0.002	0.2613	2.12269	2	1430.79	0.148554	73.1784	0
B0QZL1	Alpha-enolase (Fragment) OS=Mus musculus GN=Eno1 PE=1 SV=1 - [B0QZL1_MOUSE]	2.11139	4.52	4	1	1	1	221	23.9204	7.95752
	A2	Sequence	# PSMs	# Proteins	# Protein Groups	Protein Group Accessions	Modifications	ΔCn	phosphoRS Site Probabilities	q-Value	PEP	XCorr	Charge	MH+ [Da]	ΔM [ppm]	RT [min]	# Missed Cleavages
	High	IGAEVYHNLK	1	4	1	B0QZL1		0		0.001	0.2071	2.11139	2	1143.62	-0.384156	35.1854	0
