# Supplementary material for: MARK2 regulates Golgi apparatus reorientation by phosphorylation of CAMSAP2 in directional cell migratio
Source: eLife journal article supplement (doi:10.7554/elife.105977), 2025-03-26
Supplement: fig4-data4 [file MWX_ZZR_SAMPLE_PHO_ELITE_20200828.xlsx]

## Sheet: Sheet1
Accession	Description	Score	Coverage	# Proteins	# Unique Peptides	# Peptides	# PSMs	# AAs	MW [kDa]	calc. pI
Q8C1B1	Calmodulin-regulated spectrin-associated protein 2 OS=Mus musculus GN=Camsap2 PE=1 SV=3 - [CAMP2_MOUSE]	2176.28	53.52	28	89	89	695	1461	164.23	6.85889
	A2	Sequence	# PSMs	# Proteins	# Protein Groups	Protein Group Accessions	Modifications	ΔCn	phosphoRS Site Probabilities	q-Value	PEP	XCorr	Charge	MH+ [Da]	ΔM [ppm]	RT [min]	# Missed Cleavages
	High	KGEGISPLREEAAGAEDEK	5	6	1	Q8C1B1		0		0	1.245e-08	6.45011	2	1985.98	0.811829	34.694	2
	High	NVNLIEVsLSDLKPPEK	2	6	1	Q8C1B1	S8(Phospho)	0	S(8): 99.6; S(10): 0.4	0	8.63e-08	6.44271	2	1975.02	0.111365	85.4099	0
	High	TPIKGPPVSSLSLASLNTGDSESVHSGK	4	4	1	Q8C1B1		0		0	1.69933e-10	6.03078	3	2765.43	0.630461	72.9813	1
	High	GEGIsPLREEAAGAEDEKVYTDR	1	5	1	Q8C1B1	S5(Phospho)	0	S(5): 100.0; Y(20): 0.0; T(21): 0.0	0	5.135e-09	5.82162	3	2572.16	0.519679	60.8955	2
	High	TSVHGVSFDISFDKEDSAQSSTPNR	2	5	1	Q8C1B1		0		0	6.317e-10	5.6149	3	2711.25	0.0366819	66.7349	1
	High	GEGISPLREEAAGAEDEKVYTDR	2	5	1	Q8C1B1		0		0	7.232e-09	5.57557	3	2492.19	-0.213863	52.144	2
	High	SEsVEGFLsPSR	4	6	1	Q8C1B1	S3(Phospho); S9(Phospho)	0	S(1): 0.5; S(3): 99.5; S(9): 93.5; S(11): 6.5	0	1.409e-06	5.50459	2	1454.56	0.344553	72.5337	0
	High	GPPVSSLSLASLNTGDSESVHsGKRTPR	5	4	1	Q8C1B1	S22(Phospho)	0	S(5): 0.0; S(6): 0.0; S(8): 0.0; S(11): 0.0; T(14): 0.0; S(17): 0.1; S(19): 5.7; S(22): 47.1; T(26): 47.1	0	1.843e-06	5.49156	3	2916.42	0.650645	61.6273	2
	High	HIIQNALAHccLAGK	7	6	1	Q8C1B1	C10(Carbamidomethyl); C11(Carbamidomethyl)	0		0	3.049e-07	5.45543	3	1705.86	0.300119	44.4105	0
	High	DWENASTTSSVASGTEYTGPK	3	6	1	Q8C1B1		0		0	3.049e-08	5.33632	2	2187.97	0.705942	57.536	0
	High	SKsLADIKESMETPPGR	12	6	1	Q8C1B1	S3(Phospho)	0	S(1): 7.2; S(3): 92.8; S(10): 0.0; T(13): 0.0	0	4.161e-06	5.21799	3	1925.9	0.243918	49.4834	2
	High	DYTVSLDsDMDDASK	3	5	1	Q8C1B1	S8(Phospho)	0	Y(2): 0.0; T(3): 0.0; S(5): 0.0; S(8): 100.0; S(14): 0.0	0	1.237e-07	5.2096	2	1741.65	0.675783	66.7988	0
	High	SDAAKPLLGHDAVIQALAQK	12	5	1	Q8C1B1		0		0	4.721e-08	4.98211	2	2046.14	0.359734	70.1209	0
	High	LNSSLHFLQQEMQR	13	6	1	Q8C1B1		0		0	7.506e-05	4.97293	2	1730.87	0.478722	72.1033	0
	High	LNSSLHFLQQEmQR	24	6	1	Q8C1B1	M12(Oxidation)	0		0	0.0001369	4.94786	2	1746.86	0.729842	56.9397	0
	High	NVNLIEVSLSDLKPPEK	5	6	1	Q8C1B1		0		0	1.246e-06	4.90786	2	1895.05	0.51438	85.2448	0
	High	EQQAWVISPPQPSPQK	12	6	1	Q8C1B1		0		0	3.027e-05	4.78437	2	1819.93	0.448704	69.4158	0
	High	LNQsSPDNLTDTK	17	5	1	Q8C1B1	S4(Phospho)	0	S(4): 94.6; S(5): 5.4; T(10): 0.0; T(12): 0.0	0	0.0002178	4.71454	2	1512.66	-0.0329602	34.5297	0
	High	SKsLADIKEsMETPPGR	1	6	1	Q8C1B1	S3(Phospho); S10(Phospho)	0	S(1): 98.9; S(3): 1.1; S(10): 99.9; T(13): 0.1	0	0.0003585	4.63557	2	2005.87	0.747007	48.0941	2
	High	SEsVEGFLSPSR	11	6	1	Q8C1B1	S3(Phospho)	0	S(1): 0.0; S(3): 100.0; S(9): 0.0; S(11): 0.0	0	0.0002829	4.62495	2	1374.59	0.0256794	71.1556	0
	High	DYTVSLDsDmDDASK	4	5	1	Q8C1B1	S8(Phospho); M10(Oxidation)	0	Y(2): 0.0; T(3): 0.0; S(5): 0.0; S(8): 100.0; S(14): 0.0	0	4.748e-06	4.60579	2	1757.65	0.437411	50.8532	0
	High	GEGIsPLREEAAGAEDEK	3	6	1	Q8C1B1	S5(Phospho)	0	S(5): 100.0	0	0.0001699	4.58549	2	1937.85	0.946051	52.2201	1
	High	LNQSSPDNLTDTK	20	5	1	Q8C1B1		0		0	1.14e-06	4.53071	2	1432.69	0.662467	29.0074	0
	High	TLSASVDAITIHSHLWQTK	4	6	1	Q8C1B1		0		0	1.076e-06	4.53046	2	2108.11	0.357718	77.5628	0
	High	EEAAGAEDEKVYTDR	9	5	1	Q8C1B1		0		0	5.728e-06	4.47752	2	1682.75	0.467688	26.7396	1
	High	DTTQLLASEMVHLR	3	6	1	Q8C1B1		0		0	1.456e-05	4.46163	2	1613.83	0.195484	82.9503	0
	High	RTSVHGVSFDISFDKEDSAQSSTPNR	2	5	1	Q8C1B1		0		0	7.404e-05	4.44707	3	2867.36	0.465729	59.2221	2
	High	ADVsVEKLDGESDKEQFDDDQK	5	6	1	Q8C1B1	S4(Phospho)	0	S(4): 100.0; S(12): 0.0	0	3.265e-05	4.44404	3	2577.09	0.410141	48.9035	2
	High	LSLQQEmLmQMR	36	6	1	Q8C1B1	M7(Oxidation); M9(Oxidation)	0		0	1.998e-05	4.38809	3	1539.73	0.0474164	56.6022	0
	High	sVSNEGLTLNNSR	12	5	1	Q8C1B1	S1(Phospho)	0.0352	S(1): 93.5; S(3): 6.5; T(8): 0.0; S(12): 0.0	0	0.0008644	4.38694	2	1470.66	-0.240468	47.0252	0
	High	GEGISPLREEAAGAEDEK	2	6	1	Q8C1B1		0		0	0.0004643	4.38026	2	1857.88	0.801719	41.518	1
	High	KQQLEAEMEHK	13	6	1	Q8C1B1		0		0	5.91e-05	4.36533	3	1370.67	-1.02259	19.489	1
	High	DTTQLLASEmVHLR	24	6	1	Q8C1B1	M10(Oxidation)	0		0	2.44e-05	4.32272	2	1629.83	0.0929271	66.6268	0
	High	LDGEsDKEQFDDDQK	7	6	1	Q8C1B1	S5(Phospho)	0	S(5): 100.0	0	5.024e-05	4.29182	2	1848.72	0.461334	29.5509	1
	High	VNEHLKDIMEQEQK	5	5	1	Q8C1B1		0		0	2.2e-05	4.28899	2	1740.86	0.407401	40.5231	1
	High	SSSmSYVDGFIGTWPK	2	5	1	Q8C1B1	M4(Oxidation)	0		0	7.385e-06	4.2582	2	1777.81	0.270132	84.387	0
	High	EQQAWVIsPPQPSPQK	11	6	1	Q8C1B1	S8(Phospho)	0	S(8): 100.0; S(13): 0.0	0	2.812e-05	4.25677	2	1899.9	0.482275	72.629	0
	High	LSLQQEMLmQMR	11	6	1	Q8C1B1	M9(Oxidation)	0		0	0.000138	4.21813	2	1523.74	0.404721	81.5884	0
	High	SSsmSYVDGFIGTWPK	5	5	1	Q8C1B1	S3(Phospho); M4(Oxidation)	0	S(1): 33.3; S(2): 33.3; S(3): 33.3; S(5): 0.0; Y(6): 0.0; T(13): 0.0	0	5.483e-06	4.21377	2	1857.78	0.377859	86.6984	0
	High	TFIVPAIKPFDHYDFSR	1	5	1	Q8C1B1		0		0	1.208e-05	4.21282	2	2053.05	-0.121099	83.7522	0
	High	GPPVSSLSLASLNTGDSESVHSGK	5	4	1	Q8C1B1		0		0	2.367e-06	4.12825	3	2326.15	0.334008	70.6348	0
	High	LDGESDKEQFDDDQK	4	6	1	Q8C1B1		0		0	7.745e-05	4.09786	2	1768.75	0.494859	24.596	1
	High	SESVEGFLSPSR	4	6	1	Q8C1B1		0		0	0.0001802	4.09364	2	1294.63	0.233152	64.4399	0
	High	LNSsLHFLQQEmQR	4	6	1	Q8C1B1	S4(Phospho); M12(Oxidation)	0	S(3): 50.0; S(4): 50.0	0	0.001484	4.02486	2	1826.83	0.351524	63.9269	0
	High	IAcNLAWLVAK	2	5	1	Q8C1B1	C3(Carbamidomethyl)	0		0	0.0006831	4.017	2	1258.7	0.367376	84.3817	0
	High	VVRPQGAEPAKDVPsVPVLNAAK	2	5	1	Q8C1B1	S15(Phospho)	0	S(15): 100.0	0	0.0008892	4.00005	3	2422.29	0.316534	66.1854	1
	High	DYTVSLDSDmDDASK	8	5	1	Q8C1B1	M10(Oxidation)	0		0	3.017e-07	3.95812	2	1677.68	0.6899	49.3137	0
	High	VNEHLKDImEQEQK	6	5	1	Q8C1B1	M9(Oxidation)	0		0	0.0002428	3.94276	2	1756.85	0.171366	25.7503	1
	High	RSsSmSYVDGFIGTWPK	6	5	1	Q8C1B1	S3(Phospho); M5(Oxidation)	0.0151	S(2): 0.5; S(3): 6.0; S(4): 6.0; S(6): 81.5; Y(7): 6.0; T(14): 0.0	0	0.000258	3.92355	3	2013.88	0.501004	83.8209	1
	High	NGEKDWENASTTSSVASGTEYTGPK	2	6	1	Q8C1B1		0		0	2.464e-05	3.9223	3	2616.17	0.630133	49.2391	1
	High	TPRPNELKItPLNR	1	6	1	Q8C1B1	T10(Phospho)	0	T(1): 0.0; T(10): 100.0	0	0.001108	3.91487	3	1728.91	-0.551942	50.7075	1
	High	sKSLADIKESmETPPGR	17	6	1	Q8C1B1	S1(Phospho); M11(Oxidation)	0	S(1): 99.0; S(3): 1.0; S(10): 0.0; T(13): 0.0	0	3.525e-05	3.89614	2	1941.9	0.25866	33.2485	2
	High	WLKsPtTPVDPER	4	6	1	Q8C1B1	S4(Phospho); T6(Phospho)	0	S(4): 100.0; T(6): 50.0; T(7): 50.0	0	0.0001917	3.89384	2	1685.73	0.673599	58.6681	1
	High	SFVcFGDDGEPQKEPK	4	6	1	Q8C1B1	C4(Carbamidomethyl)	0		0	7.718e-05	3.74655	2	1839.82	0.365288	51.7832	1
	High	VVRPQGAEPAKDVPSVPVLNAAK	6	5	1	Q8C1B1		0		0	3.294e-05	3.73421	3	2342.32	0.232676	61.2395	1
	High	SVSNEGLTLNNSR	5	5	1	Q8C1B1		0		0	9.856e-05	3.728	2	1390.69	0.200699	38.3606	0
	High	LSLQQEMLMQMR	1	6	1	Q8C1B1		0		0	0.000835	3.72537	2	1507.74	0.43684	83.4555	0
	High	YTRPQTHSSASGGIR	9	5	1	Q8C1B1		0		0	0.0001847	3.70798	2	1617.81	0.610061	16.9252	0
	High	SSSMSYVDGFIGTWPK	2	5	1	Q8C1B1		0		0	0.0001575	3.70491	2	1761.82	0.64283	86.1168	0
	High	AKIAcNLAWLVAK	2	5	1	Q8C1B1	C5(Carbamidomethyl)	0		0	8.285e-05	3.69904	2	1457.83	0.310389	80.1573	1
	High	LMEDMDTVIKPRPQAAK	3	6	1	Q8C1B1		0		0	5.417e-05	3.69552	2	1943.01	0.66917	51.9512	0
	High	GPPVSSLsLASLNTGDSESVHSGK	9	4	1	Q8C1B1	S8(Phospho)	0	S(5): 0.0; S(6): 1.4; S(8): 97.1; S(11): 1.4; T(14): 0.0; S(17): 0.0; S(19): 0.0; S(22): 0.0	0	0.001054	3.68595	3	2406.12	0.186762	72.0181	0
	High	DSSSSSDFSSR	15	5	1	Q8C1B1		0		0	0.0006838	3.60026	2	1161.47	-0.0961458	17.7345	0
	High	GPPVSSLSLASLNTGDSESVHSGKR	6	4	1	Q8C1B1		0		0	3.747e-06	3.57692	3	2482.26	1.03222	63.2325	1
	High	SFVcFGDDGEPQK	3	6	1	Q8C1B1	C4(Carbamidomethyl)	0		0	0.0001462	3.57402	2	1485.63	0.309839	59.0761	0
	High	SLADIKESmETPPGR	3	6	1	Q8C1B1	M9(Oxidation)	0		0	9.081e-05	3.56822	2	1646.81	0.865957	36.8848	1
	High	SLYTYcPETEEINK	6	6	1	Q8C1B1	C6(Carbamidomethyl)	0		0	2.172e-05	3.51914	2	1746.79	0.754282	58.4697	0
	High	GLYVTDQEKLVTER	1	5	1	Q8C1B1		0		0	0.000245	3.51704	2	1650.87	0.595951	55.7631	1
	High	QAGLSSAAAPFSSDsPRPTHPsPQSSTR	1	6	1	Q8C1B1	S15(Phospho); S22(Phospho)	0	S(5): 0.0; S(6): 0.0; S(12): 0.0; S(13): 0.0; S(15): 96.0; T(19): 3.4; S(22): 6.1; S(25): 31.5; S(26): 31.5; T(27): 31.5	0	0.001056	3.49797	3	2984.3	1.37732	53.06	0
	High	QQLEAEMEHKKEETR	1	6	1	Q8C1B1		0		0	0.001233	3.44832	2	1885.91	-0.229783	19.1171	2
	High	sLADIKESMETPPGR	3	6	1	Q8C1B1	S1(Phospho)	0	S(1): 100.0; S(8): 0.0; T(11): 0.0	0	0.0008889	3.4314	2	1710.78	0.702295	58.8251	1
	High	NIRDsSSSSDFSSR	5	5	1	Q8C1B1	S5(Phospho)	0	S(5): 89.8; S(6): 8.4; S(7): 0.9; S(8): 0.9; S(9): 0.1; S(12): 0.0; S(13): 0.0	0	0.0008515	3.42533	2	1624.66	0.386394	24.5173	1
	High	LSLQQEmLmQmR	20	6	1	Q8C1B1	M7(Oxidation); M9(Oxidation); M11(Oxidation)	0		0	0.001261	3.36458	2	1555.73	0.10707	47.7901	0
	High	RSSSmSYVDGFIGTWPK	2	5	1	Q8C1B1	M5(Oxidation)	0		0	0.0001229	3.332	3	1933.91	0.501746	81.282	1
	High	LNQSsPDNLtDTK	1	5	1	Q8C1B1	S5(Phospho); T10(Phospho)	0	S(4): 9.6; S(5): 90.4; T(10): 90.4; T(12): 9.6	0	0.0006106	3.32821	2	1592.63	0.644451	30.5706	0
	High	FsPSQVPIQTR	5	6	1	Q8C1B1	S2(Phospho)	0	S(2): 99.9; S(4): 0.1; T(10): 0.0	0	0.001407	3.32011	2	1339.64	-0.0685046	62.1944	0
	High	EALSPcPSTISTK	3	5	1	Q8C1B1	C6(Carbamidomethyl)	0		0	0.001203	3.27029	2	1390.69	0.325739	42.7762	0
	High	TPIKGPPVSSLSLASLNTGDSESVHSGKR	1	4	1	Q8C1B1		0		0	0.0003324	3.21856	3	2921.53	-0.170989	66.4951	2
	High	SDANNFLILFR	1	6	1	Q8C1B1		0		0	0.0002687	3.18371	2	1309.69	0.0135185	86.9544	0
	High	DYTVSLDSDMDDASK	5	5	1	Q8C1B1		0		0	8.045e-05	3.14435	2	1661.69	0.574864	62.3846	0
	High	LmEDmDTVIKPRPQAAK	2	6	1	Q8C1B1	M2(Oxidation); M5(Oxidation)	0		0	0.001346	3.12055	2	1975	0.677655	29.2396	0
	High	KQQLEAEMEHKK	5	6	1	Q8C1B1		0		0	0.0009436	3.10064	3	1498.77	-0.120248	16.8407	2
	High	QAGLSSAAAPFSSDSPRPTHPSPQSSTR	3	6	1	Q8C1B1		0		0	8.894e-05	3.04623	3	2824.36	0.649995	45.3251	0
	High	KGEGIsPLREEAAGAEDEK	3	6	1	Q8C1B1	S6(Phospho)	0	S(6): 100.0	0	0.0009876	3.03232	3	2065.95	1.82661	44.0466	2
	High	SQPGSSASSSSGVK	8	5	1	Q8C1B1		0		0	0.001294	2.91107	2	1265.6	0.384275	11.2423	0
	High	QAGLSSAAAPFSSDsPRPTHPSPQSSTR	9	6	1	Q8C1B1	S15(Phospho)	0	S(5): 0.0; S(6): 0.0; S(12): 2.5; S(13): 14.1; S(15): 83.1; T(19): 0.1; S(22): 0.0; S(25): 0.1; S(26): 0.1; T(27): 0.0	0	0.0002716	2.87324	3	2904.33	1.02367	48.0541	0
	High	ADVSVEKLDGESDKEQFDDDQK	1	6	1	Q8C1B1		0		0	0.0008297	2.86029	3	2497.12	0.481132	44.5443	2
	High	VVRPQGAEPAK	8	5	1	Q8C1B1		0		0	0.0005904	2.72474	3	1151.65	0.0534988	16.7486	0
	High	LmEDMDTVIKPRPQAAK	11	6	1	Q8C1B1	M2(Oxidation)	0		0	0.0004773	2.65497	2	1959	0.143792	42.5331	0
	High	NIRDssSSSDFSSR	2	5	1	Q8C1B1	S5(Phospho); S6(Phospho)	0	S(5): 93.4; S(6): 49.9; S(7): 49.9; S(8): 6.5; S(9): 0.1; S(12): 0.0; S(13): 0.0	0.001	0.003976	3.86923	2	1704.63	0.641568	26.5155	1
	High	DHIEsPKTPIK	4	6	1	Q8C1B1	S5(Phospho)	0	S(5): 100.0; T(8): 0.0	0.001	0.001867	3.79288	3	1344.66	-0.282639	27.8752	1
	High	TLTPPRsVDsLPR	1	6	1	Q8C1B1	S7(Phospho); S10(Phospho)	0	T(1): 0.0; T(3): 0.0; S(7): 100.0; S(10): 100.0	0.001	0.003736	3.73336	2	1598.73	0.274779	63.5936	1
	High	ADVsVEKLDGEsDKEQFDDDQK	1	6	1	Q8C1B1	S4(Phospho); S12(Phospho)	0	S(4): 100.0; S(12): 100.0	0.001	0.005668	3.69932	3	2657.05	0.205597	51.2916	2
	High	YTRPQTHSsASGGIR	4	5	1	Q8C1B1	S9(Phospho)	0	Y(1): 0.0; T(2): 0.0; T(6): 0.0; S(8): 49.6; S(9): 49.6; S(11): 0.9	0.001	0.01127	3.58904	3	1697.78	0.0569086	9.6816	0
	High	WLKsPTTPVDPER	5	6	1	Q8C1B1	S4(Phospho)	0	S(4): 98.4; T(6): 0.8; T(7): 0.8	0.001	0.008245	3.53082	2	1605.77	0.493038	53.8913	1
	High	RSSsMSYVDGFIGTWPK	2	5	1	Q8C1B1	S4(Phospho)	0	S(2): 2.1; S(3): 12.5; S(4): 83.3; S(6): 2.1; Y(7): 0.0; T(14): 0.0	0.001	0.003376	3.51781	2	1997.88	0.288345	85.3369	1
	High	RFSPsQVPIQTR	6	6	1	Q8C1B1	S5(Phospho)	0	S(3): 0.0; S(5): 100.0; T(11): 0.0	0.001	0.003352	3.47216	2	1495.74	0.642544	56.1669	1
	High	DDQKAENDMAMK	3	6	1	Q8C1B1		0		0.001	0.002937	3.45699	3	1395.59	-0.958924	19.4126	1
	High	GIIRSVsNEGLTLNNSR	1	5	1	Q8C1B1	S7(Phospho)	0	S(5): 14.1; S(7): 71.2; T(12): 0.7; S(16): 14.1	0.001	0.006949	3.42976	2	1909.95	0.220037	61.3945	1
	High	GPPVSSLSLAsLNTGDSESVHSGKR	5	4	1	Q8C1B1	S11(Phospho)	0	S(5): 0.4; S(6): 2.3; S(8): 83.8; S(11): 13.5; T(14): 0.0; S(17): 0.0; S(19): 0.0; S(22): 0.0	0.001	0.002802	3.42005	3	2562.22	0.0860524	65.2415	1
	High	mTSFAEQKFR	1	6	1	Q8C1B1	M1(Oxidation)	0		0.001	0.005128	3.41964	2	1260.6	0.175643	32.0998	1
	High	VccGFFFKDDQK	3	6	1	Q8C1B1	C2(Carbamidomethyl); C3(Carbamidomethyl)	0		0.001	0.00403	3.41853	2	1550.68	0.291693	57.9031	1
	High	TLTPPRsVDSLPR	1	6	1	Q8C1B1	S7(Phospho)	0	T(1): 0.0; T(3): 0.0; S(7): 100.0; S(10): 0.0	0.001	0.006575	3.35039	2	1518.77	0.946996	56.7684	1
	High	SPTtPVDPER	3	6	1	Q8C1B1	T4(Phospho)	0	S(1): 0.0; T(3): 5.9; T(4): 94.1	0.001	0.01175	3.33994	2	1178.51	0.100552	27.5701	0
	High	GTLGPcDHNPGEK	9	6	1	Q8C1B1	C6(Carbamidomethyl)	0		0.001	0.005678	3.24329	2	1381.62	0.315325	18.6586	0
	High	WLKSPTTPVDPER	1	6	1	Q8C1B1		0		0.001	0.004939	3.21085	2	1525.8	-0.106469	48.5976	1
	High	RFSPSQVPIQTR	2	6	1	Q8C1B1		0		0.001	0.007088	3.15315	2	1415.78	0.0911119	43.6385	1
	High	sQPGSSASSSSGVK	3	5	1	Q8C1B1	S1(Phospho)	0	S(1): 100.0; S(5): 0.0; S(6): 0.0; S(8): 0.0; S(9): 0.0; S(10): 0.0; S(11): 0.0	0.001	0.009073	3.13373	2	1345.56	0.889109	17.0304	0
	High	DSSSsSDFSSR	8	5	1	Q8C1B1	S5(Phospho)	0.0157	S(2): 0.0; S(3): 0.0; S(4): 0.3; S(5): 99.4; S(6): 0.3; S(9): 0.0; S(10): 0.0	0.001	0.003498	3.12861	2	1241.43	-0.304662	19.2	0
	High	MTSFAEQKFR	1	6	1	Q8C1B1		0		0.001	0.009322	3.10453	2	1244.61	0.211608	39.5484	1
	High	SPTTPVDPER	2	6	1	Q8C1B1		0		0.001	0.002424	3.03786	2	1098.54	0.017148	26.2819	0
	High	sLADIKESmETPPGR	2	6	1	Q8C1B1	S1(Phospho); M9(Oxidation)	0	S(1): 100.0; S(8): 0.0; T(11): 0.0	0.001	0.007932	2.98832	2	1726.77	-0.318205	41.7236	1
	High	AENDMAMK	4	6	1	Q8C1B1		0		0.001	0.007624	2.95628	2	909.381	0.211758	20.0648	0
	High	VccGFFFK	3	6	1	Q8C1B1	C2(Carbamidomethyl); C3(Carbamidomethyl)	0		0.001	0.003003	2.92642	2	1064.47	0.130253	73.4131	0
	High	KKGEGISPLR	2	6	1	Q8C1B1		0		0.001	0.006924	2.91284	2	1084.65	-0.332869	18.3995	2
	High	MIEGLYKYNSDR	2	6	1	Q8C1B1		0		0.001	0.005461	2.88633	2	1488.72	-0.0374891	47.734	1
	High	NIRDSSSSSDFSSR	4	5	1	Q8C1B1		0		0.001	0.005006	2.84588	2	1544.69	0.262852	22.1339	1
	High	SASFSVKNQR	2	6	1	Q8C1B1		0		0.001	0.003613	2.80805	2	1123.59	0.439485	17.0149	1
	High	sFVcFGDDGEPQKEPK	2	6	1	Q8C1B1	S1(Phospho); C4(Carbamidomethyl)	0	S(1): 100.0	0.001	0.00266	2.76357	3	1919.79	0.045263	56.1031	1
	High	LNSsLHFLQQEMQR	7	6	1	Q8C1B1	S4(Phospho)	0.0217	S(3): 9.9; S(4): 90.1	0.001	0.004108	2.70506	2	1810.83	-0.0266701	76.8639	0
	High	KGEGISPLR	1	6	1	Q8C1B1		0		0.001	0.01149	2.64412	2	956.552	-0.186757	26.1899	1
	High	GLYVTDQEK	3	5	1	Q8C1B1		0		0.001	0.007511	2.56785	2	1052.53	-0.0920313	32.96	0
	High	FSPSQVPIQTR	4	6	1	Q8C1B1		0		0.001	0.01009	2.22901	2	1259.67	-0.0550661	52.971	0
	High	ADVsVEKLDGESDK	1	6	1	Q8C1B1	S4(Phospho)	0	S(4): 100.0; S(12): 0.0	0.002	0.02361	2.99485	2	1571.68	0.0261624	39.8682	1
	High	LLQDYDLR	2	5	1	Q8C1B1		0		0.002	0.0212	2.96824	2	1035.55	-0.28279	55.4034	0
	High	LPNGALQNR	1	5	1	Q8C1B1		0		0.002	0.02204	2.87271	2	982.543	0.365571	27.4003	0
	High	EALsPcPsTISTK	1	5	1	Q8C1B1	S4(Phospho); C6(Carbamidomethyl); S8(Phospho)	0	S(4): 90.4; S(8): 18.9; T(9): 89.1; S(11): 1.4; T(12): 0.2	0.002	0.02616	2.77457	2	1550.62	1.1292	49.3718	0
	High	EQQAWVISPPQPSPQKQIR	1	6	1	Q8C1B1		0		0.002	0.01224	2.70335	3	2217.18	-0.158801	64.6314	1
	High	QQLEAEMEHK	3	6	1	Q8C1B1		0		0.002	0.01778	2.35748	3	1242.58	-0.121612	24.9204	0
	High	GPPVSSLSLASLNtGDSESVHSGKRtPR	2	4	1	Q8C1B1	T14(Phospho); T26(Phospho)	0	S(5): 0.4; S(6): 1.4; S(8): 5.2; S(11): 87.5; T(14): 5.2; S(17): 5.3; S(19): 0.8; S(22): 5.3; T(26): 89.0	0.004	0.04975	4.23403	3	2996.39	1.5628	64.0548	2
	High	LLQDYDLRAsNPR	2	5	1	Q8C1B1	S10(Phospho)	0	Y(5): 0.0; S(10): 100.0	0.004	0.05272	3.22474	2	1640.78	0.564772	53.1412	1
	High	KMEAAFTK	1	6	1	Q8C1B1		0		0.004	0.04133	2.66717	2	925.481	0.0296825	22.4111	1
	High	ILEEMEK	2	11	1	Q8C1B1		0		0.004	0.04787	2.62025	2	891.449	-0.530858	34.615	0
	High	SIHRDHIESPK	1	6	1	Q8C1B1		0		0.004	0.03772	2.55538	3	1318.69	0.00882063	15.4598	1
	High	ESmETPPGR	2	6	1	Q8C1B1	M3(Oxidation)	0		0.004	0.03847	2.39537	2	1019.45	-0.319634	13.379	0
	High	LYKEPSAK	2	23	1	Q8C1B1		0		0.004	0.05011	2.37035	2	935.519	-0.38117	15.4199	1
	High	TAFLTVVK	1	6	1	Q8C1B1		0		0.004	0.05093	2.32335	2	878.534	-0.309542	64.0202	0
	High	SVDsLPR	1	6	1	Q8C1B1	S4(Phospho)	0	S(1): 0.0; S(4): 100.0	0.005	0.06192	2.62432	2	853.381	-0.124223	36.2761	0
	High	TAFLtVVK	1	6	1	Q8C1B1	T5(Phospho)	0	T(1): 0.0; T(5): 100.0	0.005	0.0601	2.28599	2	958.501	-0.243416	76.5319	0
	High	LRRFsPSQVPIQTR	1	6	1	Q8C1B1	S5(Phospho)	0	S(5): 87.0; S(7): 13.0; T(13): 0.0	0.007	0.07836	2.6731	3	1764.93	-0.056263	52.7543	2
	High	mTSFAEQK	1	6	1	Q8C1B1	M1(Oxidation)	0		0.007	0.07613	2.57299	2	957.435	-0.103844	16.9227	0
	High	KQFSHIPAK	1	6	1	Q8C1B1		0		0.007	0.06748	2.55857	3	1055.6	-0.324885	17.8968	1
	High	DIMEQEQK	1	5	1	Q8C1B1		0		0.007	0.07246	2.41157	2	1020.47	-0.208765	23.3427	0
	High	mEAAFTK	1	6	1	Q8C1B1	M1(Oxidation)	0		0.008	0.09117	2.12557	2	813.381	0.356524	18.7634	0
A0A0R4J227	Non-specific serine/threonine protein kinase OS=Mus musculus GN=Mark2 PE=1 SV=1 - [A0A0R4J227_MOUSE]	313.308	53.05	35	36	36	105	722	80.8235	9.59814
	A2	Sequence	# PSMs	# Proteins	# Protein Groups	Protein Group Accessions	Modifications	ΔCn	phosphoRS Site Probabilities	q-Value	PEP	XCorr	Charge	MH+ [Da]	ΔM [ppm]	RT [min]	# Missed Cleavages
	High	SSELEGDTITLKPRPsADLTNSSAPSPSHK	3	13	1	A0A0R4J227	S16(Phospho)	0	S(1): 0.0; S(2): 0.0; T(8): 0.0; T(10): 0.0; S(16): 93.9; T(20): 4.1; S(22): 0.9; S(23): 0.9; S(26): 0.0; S(28): 0.0	0	1.951e-06	5.7296	3	3202.53	0.752993	57.2859	0
	High	VPVASPsAHNISSSSGAPDR	5	18	1	A0A0R4J227	S7(Phospho)	0	S(5): 0.0; S(7): 100.0; S(12): 0.0; S(13): 0.0; S(14): 0.0; S(15): 0.0	0	2.812e-09	5.70217	2	2015.92	-0.0257008	37.0953	0
	High	VPVASPSAHNISSSSGAPDR	5	18	1	A0A0R4J227		0		0	5.668e-10	5.70192	2	1935.95	0.867572	32.1868	0
	High	YNEVmATYLLLGYK	1	13	1	A0A0R4J227	M5(Oxidation)	0		0	3.834e-08	4.99749	2	1693.85	0.802909	85.6817	0
	High	DQQNLPYGVTPASPSGHSQGR	3	18	1	A0A0R4J227		0		0	1.752e-07	4.94636	2	2196.04	-1.39742	45.5186	0
	High	VETLRPHVVGSGGTDKDKEEFR	2	12	1	A0A0R4J227		0		0	4.475e-07	4.8277	3	2456.25	-0.541571	32.6746	2
	High	IIDKTQLNSSSLQK	2	15	1	A0A0R4J227		0		0	2.283e-06	4.74751	2	1574.88	0.654522	35.8033	1
	High	NSATSADEQPHIGNYR	3	17	1	A0A0R4J227		0		0	1.47e-07	4.66732	2	1759.8	0.077762	31.1348	0
	High	LDTFcGSPPYAAPELFQGK	1	26	1	A0A0R4J227	C5(Carbamidomethyl)	0		0	1.07e-06	4.37282	2	2098	0.382226	84.2171	0
	High	DTEQPTLGHLDSKPSsK	9	12	1	A0A0R4J227	S16(Phospho)	0.0094	T(2): 0.0; T(6): 0.0; S(12): 0.1; S(15): 1.0; S(16): 98.8	0	7.39e-05	4.20512	2	1919.88	0.752096	36.709	0
	High	TTPAPSTNSVLSTSTNR	3	16	1	A0A0R4J227		0		0	1.734e-05	4.03138	2	1733.87	-0.134246	42.6411	0
	High	NSAtSADEQPHIGNYR	3	17	1	A0A0R4J227	T4(Phospho)	0	S(2): 0.5; T(4): 49.7; S(5): 49.7; Y(15): 0.0	0	3.318e-05	4.00778	2	1839.77	0.659362	37.2149	0
	High	VLDANScQSELHER	1	14	1	A0A0R4J227	C7(Carbamidomethyl)	0		0	2.513e-05	4.00249	2	1657.76	-0.141243	29.3902	0
	High	KVLDANScQSELHER	1	14	1	A0A0R4J227	C8(Carbamidomethyl)	0		0	3.721e-07	3.94768	3	1785.85	-0.411664	24.9728	1
	High	RSSDQAVPAIPTSNSYSK	2	14	1	A0A0R4J227		0		0	1.646e-08	3.9476	2	1907.95	0.339334	43.2205	1
	High	IPFYMSTDcENLLK	1	22	1	A0A0R4J227	C9(Carbamidomethyl)	0		0	6.99e-06	3.86622	2	1730.81	0.727526	84.2102	0
	High	IPFYmSTDcENLLK	2	22	1	A0A0R4J227	M5(Oxidation); C9(Carbamidomethyl)	0		0	0.0003062	3.77939	2	1746.81	-0.00197127	80.8309	0
	High	TPLPTLNERDTEQPTLGHLDSKPSSK	1	11	1	A0A0R4J227		0		0	0.0001281	3.76625	3	2861.47	1.07459	56.3639	1
	High	KTTPAPSTNSVLSTSTNR	1	16	1	A0A0R4J227		0		0	0.0001108	3.663	3	1861.96	-0.0335139	33.8377	1
	High	QIVSAVQYcHQK	3	23	1	A0A0R4J227	C9(Carbamidomethyl)	0		0	0.0008605	3.60609	2	1460.73	-0.419475	31.8298	0
	High	ASLGQASIQNGK	1	17	1	A0A0R4J227		0		0	0.0002426	3.59594	2	1173.62	-0.451252	26.6506	0
	High	DTEQPTLGHLDSKPSSK	2	12	1	A0A0R4J227		0		0	0.0001292	3.44697	2	1839.91	0.266195	31.0234	0
	High	SSELEGDTITLKPRPSADLTNSSAPSPSHK	1	13	1	A0A0R4J227		0		0	7.047e-05	3.40629	4	3122.56	1.18562	52.5441	0
	High	TELMVSmGYTR	2	12	1	A0A0R4J227	M7(Oxidation)	0		0	0.001377	3.38123	2	1303.6	-1.44137	47.5601	0
	High	EEIQDSLVGQR	5	12	1	A0A0R4J227		0		0	0.001399	3.37001	2	1273.64	0.208932	46.0067	0
	High	TTSSMEPNEMMR	1	15	1	A0A0R4J227		0		0	0.0006196	3.3256	2	1413.58	-0.118348	42.2623	0
	High	TTPAPsTNSVLSTSTNR	1	16	1	A0A0R4J227	S6(Phospho)	0	T(1): 0.0; T(2): 0.0; S(6): 80.5; T(7): 9.0; S(9): 9.0; S(12): 0.1; T(13): 1.1; S(14): 0.1; T(15): 0.1	0	0.0006194	3.31291	2	1813.83	1.00341	49.2737	0
	High	SSDQAVPAIPTSNSYSK	2	14	1	A0A0R4J227		0		0	0.0002092	2.93257	2	1751.85	1.09251	50.8639	0
	High	TELMVSMGYTR	1	12	1	A0A0R4J227		0		0	0.0008963	2.74314	2	1287.61	0.56419	66.083	0
	High	IIDKTQLNSSsLQK	1	15	1	A0A0R4J227	S11(Phospho)	0	T(5): 0.0; S(9): 1.0; S(10): 89.7; S(11): 9.3	0.001	0.002722	3.96637	2	1654.84	0.683119	37.0712	1
	High	AENLLLDADmNIK	3	24	1	A0A0R4J227	M10(Oxidation)	0		0.001	0.003371	3.63567	2	1475.74	0.103159	74.2162	0
	High	SRNsPLLDR	1	17	1	A0A0R4J227	S4(Phospho)	0	S(1): 0.0; S(4): 100.0	0.001	0.01199	3.39191	2	1137.54	0.146926	25.5443	1
	High	RSsDQAVPAIPTSNSYSK	2	14	1	A0A0R4J227	S3(Phospho)	0.0319	S(2): 11.4; S(3): 88.6; T(12): 0.0; S(13): 0.0; S(15): 0.0; Y(16): 0.0; S(17): 0.0	0.001	0.002637	3.33696	2	1987.91	0.253007	48.8316	1
	High	LFEVIETEK	5	26	1	A0A0R4J227		0		0.001	0.006675	3.27313	2	1107.59	-0.0758878	66.0083	0
	High	RTELMVSMGYTR	1	12	1	A0A0R4J227		0		0.001	0.005071	3.20756	2	1443.71	-0.120397	54.7506	1
	High	TELmVSmGYTR	1	12	1	A0A0R4J227	M4(Oxidation); M7(Oxidation)	0		0.001	0.004906	3.11196	2	1319.6	-1.17818	39.1286	0
	High	VPASPLPGLDR	2	16	1	A0A0R4J227		0		0.001	0.001823	3.09623	2	1121.63	-0.549554	61.2495	0
	High	AENLLLDADMNIK	1	24	1	A0A0R4J227		0		0.001	0.003893	3.03256	2	1459.75	0.551151	82.8089	0
	High	VLNHPNIVK	2	14	1	A0A0R4J227		0		0.001	0.009929	2.94178	2	1033.61	-0.520124	27.866	0
	High	FLILNPSK	2	13	1	A0A0R4J227		0		0.001	0.00508	2.68175	2	931.561	-0.422646	70.8902	0
	High	VETLRPHVVGSGGTDK	2	12	1	A0A0R4J227		0		0.001	0.001698	2.60161	2	1651.88	0.207771	26.585	0
	High	IPFYMSTDcENLLKK	1	16	1	A0A0R4J227	C9(Carbamidomethyl)	0		0.001	0.00842	2.21241	2	1858.91	0.940442	78.8188	1
	High	DQQNLPYGVTPASPSGHsQGR	2	18	1	A0A0R4J227	S18(Phospho)	0.0439	Y(7): 0.0; T(10): 69.1; S(13): 10.3; S(15): 10.3; S(18): 10.3	0.002	0.03176	2.83132	3	2276.01	0.45947	49.1167	0
	High	VPAsPLPGLDR	1	16	1	A0A0R4J227	S4(Phospho)	0	S(4): 100.0	0.002	0.01299	2.68981	2	1201.6	0.0779121	63.6097	0
	High	SsDQAVPAIPTSNSYSK	2	14	1	A0A0R4J227	S2(Phospho)	0	S(1): 50.0; S(2): 50.0; T(11): 0.0; S(12): 0.0; S(14): 0.0; Y(15): 0.0; S(16): 0.0	0.002	0.01767	2.54045	2	1831.81	0.366198	57.4955	0
	High	TQLNSSSLQK	2	15	1	A0A0R4J227		0		0.002	0.01424	2.52442	2	1105.58	0.0679875	24.993	0
	High	KFLILNPSK	1	13	1	A0A0R4J227		0		0.002	0.02104	2.45093	2	1059.66	-0.198095	54.723	1
	High	GTLEQImK	2	19	1	A0A0R4J227	M7(Oxidation)	0		0.004	0.05762	2.46807	2	935.486	-0.27744	29.4622	0
	High	TPLPTLNER	2	12	1	A0A0R4J227		0		0.004	0.0371	2.33172	2	1040.57	-0.114786	49.1451	0
	High	ISGTSMAFK	1	14	1	A0A0R4J227		0		0.004	0.04742	2.31312	2	941.476	0.119586	41.1046	0
Q9Z1R9	MCG124046 OS=Mus musculus GN=Prss1 PE=1 SV=1 - [Q9Z1R9_MOUSE]	68.2491	8.13	1	1	1	20	246	26.1178	4.94482
	A2	Sequence	# PSMs	# Proteins	# Protein Groups	Protein Group Accessions	Modifications	ΔCn	phosphoRS Site Probabilities	q-Value	PEP	XCorr	Charge	MH+ [Da]	ΔM [ppm]	RT [min]	# Missed Cleavages
	High	LGEHNINVLEGNEQFIDAAK	20	1	1	Q9Z1R9		0		0	1.665e-05	4.43277	3	2211.11	0.588198	77.9849	0
Q99PV0	Pre-mRNA-processing-splicing factor 8 OS=Mus musculus GN=Prpf8 PE=1 SV=2 - [PRP8_MOUSE]	66.4893	9.04	3	19	19	22	2335	273.443	8.83643
	A2	Sequence	# PSMs	# Proteins	# Protein Groups	Protein Group Accessions	Modifications	ΔCn	phosphoRS Site Probabilities	q-Value	PEP	XCorr	Charge	MH+ [Da]	ΔM [ppm]	RT [min]	# Missed Cleavages
	High	NNVNVASLTQSEIR	1	1	1	Q99PV0		0		0	3.981e-07	4.11938	2	1544.8	0.481029	62.2342	0
	High	LIVDHNIADYMTAK	1	3	1	Q99PV0		0		0	0.0004675	3.94439	2	1603.81	0.042215	73.5988	0
	High	KNNVNVASLTQSEIR	1	1	1	Q99PV0		0		0	0.0003942	3.71058	2	1672.9	0.152739	51.2322	1
	High	GSELQLPFQAcLK	1	1	1	Q99PV0	C11(Carbamidomethyl)	0		0	2.66e-05	3.54725	2	1490.77	-0.0723503	84.4028	0
	High	QTDVGITHFR	1	1	1	Q99PV0		0		0	0.001183	3.10391	2	1173.6	0.0874128	38.5898	0
	High	QILmASGSTTFTK	1	1	1	Q99PV0	M4(Oxidation)	0		0	0.00102	2.50857	2	1400.71	0.0697818	49.0249	0
	High	LIVDHNIADYmTAK	1	3	1	Q99PV0	M11(Oxidation)	0		0.001	0.003265	3.30157	2	1619.81	0.0158981	53.4164	0
	High	FGNAFHLcR	1	3	1	Q99PV0	C8(Carbamidomethyl)	0		0.001	0.004476	3.27168	2	1121.53	-0.456692	47.9715	0
	High	EELGLIEQAYDNPHEALSR	1	3	1	Q99PV0		0		0.001	0.006906	3.17149	2	2184.06	1.15952	76.872	0
	High	DGVWNLQNEVTK	1	1	1	Q99PV0		0		0.001	0.006386	3.10948	2	1402.7	0.197784	71.0744	0
	High	ANPALYVLR	1	1	1	Q99PV0		0		0.001	0.005519	3.01427	2	1016.59	-0.108849	67.6827	0
	High	LLILALER	1	3	1	Q99PV0		0		0.001	0.006916	2.97004	2	940.619	-0.0927229	84.1312	0
	High	IIHTSVWAGQK	1	1	1	Q99PV0		0		0.001	0.006042	2.96136	2	1239.68	0.0117295	38.4746	0
	High	QILMASGSTTFTK	1	1	1	Q99PV0		0		0.001	0.001675	2.84355	2	1384.71	0.100885	59.6063	0
	High	ADWWTNTAHYNR	1	3	1	Q99PV0		0		0.001	0.006201	2.62399	2	1534.68	0.0373206	55.372	0
	High	FPPVVFYTPK	2	1	1	Q99PV0		0		0.001	0.002396	2.40663	2	1194.66	0.00671114	84.6665	0
	High	YLTEHPDPNNENIVGYNNKK	1	1	1	Q99PV0		0		0.002	0.02086	3.30515	3	2359.14	1.9406	42.0386	1
	High	IDLTLLNR	1	3	1	Q99PV0		0		0.002	0.02052	2.9379	2	957.573	-0.127265	76.8521	0
	High	TISSYTAFSR	1	1	1	Q99PV0		0		0.004	0.03873	2.72155	2	1132.56	0.484805	49.4191	0
	High	YYVLNALK	1	3	1	Q99PV0		0		0.007	0.07344	2.49296	2	983.556	-0.107262	68.2907	0
	High	QNPFWWTHQR	1	1	1	Q99PV0		0		0.007	0.07142	2.08255	2	1399.67	0.248476	67.1637	0
P02535-3	Isoform 3 of Keratin, type I cytoskeletal 10 OS=Mus musculus GN=Krt10 - [K1C10_MOUSE]	27.596	13.2	8	5	6	9	462	49.4709	5.021
	A2	Sequence	# PSMs	# Proteins	# Protein Groups	Protein Group Accessions	Modifications	ΔCn	phosphoRS Site Probabilities	q-Value	PEP	XCorr	Charge	MH+ [Da]	ΔM [ppm]	RT [min]	# Missed Cleavages
	High	QSLEASLAETEGR	1	4	1	P02535-3		0		0	5.649e-05	3.59527	2	1390.68	0.193173	53.7388	0
	High	ALEESNYELEGK	2	4	1	P02535-3		0		0	0.001337	3.46809	2	1381.65	1.16279	41.9753	0
	High	QSVEADINGLR	1	6	1	P02535-3		0		0	0.000731	2.80405	2	1201.62	0.739246	53.1592	0
	High	LENEIQTYR	1	4	1	P02535-3		0		0.001	0.002962	3.63149	2	1165.59	0.483403	37.3002	0
	High	VTMQNLNDR	2	14	2	P02535-3;Q61781		0		0.002	0.01337	2.68148	2	1090.53	-0.642131	31.1916	0
	High	VTmQNLNDR	1	14	2	P02535-3;Q61781	M3(Oxidation)	0		0.002	0.03256	2.60859	2	1106.53	-0.00885203	9.76094	0
	High	IKEWYEK	1	4	1	P02535-3		0		0.005	0.0632	2.20023	2	995.52	-0.0516475	31.029	1
Q61781	Keratin, type I cytoskeletal 14 OS=Mus musculus GN=Krt14 PE=1 SV=2 - [K1C14_MOUSE]	20.0797	8.68	17	1	5	7	484	52.8339	5.17334
	A2	Sequence	# PSMs	# Proteins	# Protein Groups	Protein Group Accessions	Modifications	ΔCn	phosphoRS Site Probabilities	q-Value	PEP	XCorr	Charge	MH+ [Da]	ΔM [ppm]	RT [min]	# Missed Cleavages
	High	VLDELTLAR	1	6	2	Q61781;Q6IFX2		0		0	0.001043	3.49175	2	1029.59	0.0975524	65.4182	0
	High	EVATNSELVQSGK	1	2	1	Q61781		0		0.001	0.002891	3.36696	2	1361.69	0.598241	29.9366	0
	High	LEQEIATYR	1	16	2	Q61781;Q6IFX2		0		0.002	0.03266	2.6821	2	1122.58	0.0229747	39.1444	0
	High	VTMQNLNDR	2	14	2	P02535-3;Q61781		0		0.002	0.01337	2.68148	2	1090.53	-0.642131	31.1916	0
	High	VTmQNLNDR	1	14	2	P02535-3;Q61781	M3(Oxidation)	0		0.002	0.03256	2.60859	2	1106.53	-0.00885203	9.76094	0
	High	TRLEQEIATYR	1	13	2	Q61781;Q6IFX2		0		0.007	0.06763	2.46541	2	1379.73	-0.24404	48.0822	1
Q3URH5	Uncharacterized protein (Fragment) OS=Mus musculus GN=Smarca4 PE=2 SV=1 - [Q3URH5_MOUSE]	18.5377	3.33	15	1	5	7	1261	142.828	8.6167
	A2	Sequence	# PSMs	# Proteins	# Protein Groups	Protein Group Accessions	Modifications	ΔCn	phosphoRS Site Probabilities	q-Value	PEP	XCorr	Charge	MH+ [Da]	ΔM [ppm]	RT [min]	# Missed Cleavages
	High	VIQAGMFDQK	1	18	2	E9QAB8;Q3URH5		0		0.001	0.002584	2.92814	2	1136.58	0.0269191	50.6841	0
	High	LMAEDEEGYRK	2	16	2	E9QAB8;Q3URH5		0		0.001	0.009387	2.90952	2	1340.61	-0.365264	24.1052	1
	High	LMAEDEEGYR	1	16	2	E9QAB8;Q3URH5		0		0.001	0.00226	2.52299	2	1212.52	-0.505106	32.8187	0
	High	GVLLTDGSEK	1	7	1	Q3URH5		0		0.002	0.03258	2.57233	2	1018.54	-0.0194347	36.9831	0
	High	LLLTGTPLQNK	1	14	2	Q3URH5;E9QAB8		0		0.002	0.01267	2.47761	2	1197.72	0.0510491	67.9438	0
	High	VIQAGmFDQK	1	18	2	E9QAB8;Q3URH5	M6(Oxidation)	0		0.004	0.05308	2.79434	2	1152.57	-0.00985405	35.5181	0
E9QAB8	Probable global transcription activator SNF2L2 OS=Mus musculus GN=Smarca2 PE=1 SV=1 - [E9QAB8_MOUSE]	18.5332	3.11	17	1	5	7	1510	172.443	9.11475
	A2	Sequence	# PSMs	# Proteins	# Protein Groups	Protein Group Accessions	Modifications	ΔCn	phosphoRS Site Probabilities	q-Value	PEP	XCorr	Charge	MH+ [Da]	ΔM [ppm]	RT [min]	# Missed Cleavages
	High	VIQAGMFDQK	1	18	2	E9QAB8;Q3URH5		0		0.001	0.002584	2.92814	2	1136.58	0.0269191	50.6841	0
	High	LMAEDEEGYRK	2	16	2	E9QAB8;Q3URH5		0		0.001	0.009387	2.90952	2	1340.61	-0.365264	24.1052	1
	High	EVESQLPEKVEYVIK	1	9	1	E9QAB8		0		0.001	0.00956	2.56788	2	1789.96	0.146591	73.1955	1
	High	LMAEDEEGYR	1	16	2	E9QAB8;Q3URH5		0		0.001	0.00226	2.52299	2	1212.52	-0.505106	32.8187	0
	High	ILLTGTPLQNK	1	14	2	Q3URH5;E9QAB8		0		0.002	0.01267	2.47761	2	1197.72	0.0510491	67.9438	0
	High	VIQAGmFDQK	1	18	2	E9QAB8;Q3URH5	M6(Oxidation)	0		0.004	0.05308	2.79434	2	1152.57	-0.00985405	35.5181	0
Q8BYH6	Uncharacterized protein OS=Mus musculus GN=Snrnp200 PE=2 SV=1 - [Q8BYH6_MOUSE]	17.4144	1.45	2	1	1	5	690	78.9808	5.10986
	A2	Sequence	# PSMs	# Proteins	# Protein Groups	Protein Group Accessions	Modifications	ΔCn	phosphoRS Site Probabilities	q-Value	PEP	XCorr	Charge	MH+ [Da]	ΔM [ppm]	RT [min]	# Missed Cleavages
	High	GPVLEALVAR	5	2	1	Q8BYH6		0		0	0.0001717	4.10112	2	1024.61	-0.103002	74.2088	0
Q6KAP1	MFLJ00246 protein (Fragment) OS=Mus musculus GN=mFLJ00246 PE=4 SV=1 - [Q6KAP1_MOUSE]	15.105	3.92	13	5	5	5	1454	153.823	5.04639
	A2	Sequence	# PSMs	# Proteins	# Protein Groups	Protein Group Accessions	Modifications	ΔCn	phosphoRS Site Probabilities	q-Value	PEP	XCorr	Charge	MH+ [Da]	ΔM [ppm]	RT [min]	# Missed Cleavages
	High	GANLEEVNDEGYTPLMEAAR	1	3	1	Q6KAP1		0		0	0.0002129	3.72045	2	2179	-0.084162	78.0462	0
	High	DTPLSLAcSGGR	1	13	1	Q6KAP1	C8(Carbamidomethyl)	0		0	0.0007333	3.18663	2	1233.59	0.00461838	53.9114	0
	High	GADVNAPPVPSSR	1	12	1	Q6KAP1		0		0	0.000709	2.82242	2	1266.64	0.356326	35.3028	0
	High	DTALTIAADK	1	12	1	Q6KAP1		0		0.001	0.002658	2.8747	2	1018.54	0.519882	43.6245	0
	High	TKDTPLSLAcSGGR	1	13	1	Q6KAP1	C10(Carbamidomethyl)	0		0.004	0.04543	2.50077	2	1462.73	0.121665	41.8407	1
Q6IFX2	Keratin, type I cytoskeletal 42 OS=Mus musculus GN=Krt42 PE=1 SV=1 - [K1C42_MOUSE]	14.7713	9.29	7	2	5	5	452	50.1019	5.16064
	A2	Sequence	# PSMs	# Proteins	# Protein Groups	Protein Group Accessions	Modifications	ΔCn	phosphoRS Site Probabilities	q-Value	PEP	XCorr	Charge	MH+ [Da]	ΔM [ppm]	RT [min]	# Missed Cleavages
	High	ALEEANADLEVK	1	1	1	Q6IFX2		0		0	7.041e-05	3.83168	2	1301.66	0.0641984	46.9727	0
	High	VLDELTLAR	1	6	2	Q61781;Q6IFX2		0		0	0.001043	3.49175	2	1029.59	0.0975524	65.4182	0
	High	LEQEIATYR	1	16	2	Q61781;Q6IFX2		0		0.002	0.03266	2.6821	2	1122.58	0.0229747	39.1444	0
	High	TKYETELNLR	1	1	1	Q6IFX2		0		0.004	0.04865	2.30032	2	1266.67	0.184485	41.0553	1
	High	TRLEQEIATYR	1	13	2	Q61781;Q6IFX2		0		0.007	0.06763	2.46541	2	1379.73	-0.24404	48.0822	1
Q792Z1	MCG140784 OS=Mus musculus GN=Try10 PE=1 SV=1 - [Q792Z1_MOUSE]	14.1467	4.07	2	1	1	5	246	26.2039	5.8335
	A2	Sequence	# PSMs	# Proteins	# Protein Groups	Protein Group Accessions	Modifications	ΔCn	phosphoRS Site Probabilities	q-Value	PEP	XCorr	Charge	MH+ [Da]	ΔM [ppm]	RT [min]	# Missed Cleavages
	High	TLDNDImLIK	3	2	1	Q792Z1	M7(Oxidation)	0		0.001	0.00373	3.50726	2	1191.63	0.459791	68.1198	0
	High	TLDNDIMLIK	2	2	1	Q792Z1		0		0.001	0.0116	3.12525	2	1175.63	0.190231	78.1555	0
P10126	Elongation factor 1-alpha 1 OS=Mus musculus GN=Eef1a1 PE=1 SV=3 - [EF1A1_MOUSE]	13.5113	8.44	7	4	4	5	462	50.0821	9.01221
	A2	Sequence	# PSMs	# Proteins	# Protein Groups	Protein Group Accessions	Modifications	ΔCn	phosphoRS Site Probabilities	q-Value	PEP	XCorr	Charge	MH+ [Da]	ΔM [ppm]	RT [min]	# Missed Cleavages
	High	YYVTIIDAPGHR	2	6	1	P10126		0		0	0.001486	3.60154	2	1404.73	0.287096	60.377	0
	High	IGGIGTVPVGR	1	5	1	P10126		0		0	0.0005793	3.04302	2	1025.61	0.243691	52.9892	0
	High	QLIVGVNK	1	7	1	P10126		0		0.002	0.01797	2.21845	2	870.541	-0.155446	41.7544	0
	High	LPLQDVYK	1	5	1	P10126		0		0.004	0.04243	2.09953	2	975.551	-0.103958	56.1107	0
Q9D423	La ribonucleoprotein domain family, member 1B OS=Mus musculus GN=Larp1b PE=2 SV=1 - [Q9D423_MOUSE]	10.7669	8.87	4	2	2	3	248	29.1122	8.20654
	A2	Sequence	# PSMs	# Proteins	# Protein Groups	Protein Group Accessions	Modifications	ΔCn	phosphoRS Site Probabilities	q-Value	PEP	XCorr	Charge	MH+ [Da]	ΔM [ppm]	RT [min]	# Missed Cleavages
	High	LGIGQSQEMNTLFR	1	3	1	Q9D423		0		0	6.282e-05	4.19706	2	1593.81	0.71204	81.6977	0
	High	LGIGQSQEmNTLFR	1	3	1	Q9D423	M9(Oxidation)	0		0	1.155e-05	3.68415	2	1609.8	-0.003561	68.1397	0
	High	YGLEcLFR	1	4	1	Q9D423	C5(Carbamidomethyl)	0		0	0.0009843	2.88565	2	1057.51	0.0303575	83.2281	0
Q6ZQB6-2	Isoform 2 of Inositol hexakisphosphate and diphosphoinositol-pentakisphosphate kinase 2 OS=Mus musculus GN=Ppip5k2 - [VIP2_MOUSE]	8.94231	3.21	11	3	3	3	1058	121.104	6.68311
	A2	Sequence	# PSMs	# Proteins	# Protein Groups	Protein Group Accessions	Modifications	ΔCn	phosphoRS Site Probabilities	q-Value	PEP	XCorr	Charge	MH+ [Da]	ΔM [ppm]	RT [min]	# Missed Cleavages
	High	VYTVGPDYAHAEAR	1	10	1	Q6ZQB6-2		0		0	3.323e-05	3.45494	2	1548.74	-0.310805	39.5444	0
	High	WGGELTPAGR	1	5	1	Q6ZQB6-2		0		0.001	0.002302	3.37124	2	1043.53	-0.144033	45.0131	0
	High	QTVcGFDLLR	1	10	1	Q6ZQB6-2	C4(Carbamidomethyl)	0		0.002	0.02513	2.11613	2	1208.61	0.121875	79.402	0
Q922U2	Keratin, type II cytoskeletal 5 OS=Mus musculus GN=Krt5 PE=1 SV=1 - [K2C5_MOUSE]	8.78342	3.45	7	2	2	3	580	61.7286	7.75244
	A2	Sequence	# PSMs	# Proteins	# Protein Groups	Protein Group Accessions	Modifications	ΔCn	phosphoRS Site Probabilities	q-Value	PEP	XCorr	Charge	MH+ [Da]	ΔM [ppm]	RT [min]	# Missed Cleavages
	High	YEELQQTAGR	1	1	1	Q922U2		0		0	0.001255	3.81566	2	1194.57	-0.18975	25.9829	0
	High	NKYEDEINKR	2	7	1	Q922U2		0		0.001	0.009928	2.29526	3	1308.65	-0.210482	21.1449	2
B2RTP7	Krt2 protein OS=Mus musculus GN=Krt2 PE=2 SV=1 - [B2RTP7_MOUSE]	7.76659	1.98	2	1	1	2	707	70.8798	8.06006
	A2	Sequence	# PSMs	# Proteins	# Protein Groups	Protein Group Accessions	Modifications	ΔCn	phosphoRS Site Probabilities	q-Value	PEP	XCorr	Charge	MH+ [Da]	ΔM [ppm]	RT [min]	# Missed Cleavages
	High	GFSSGSAVVSGGSR	2	2	1	B2RTP7		0		0	0.0001899	4.11143	2	1254.61	-0.019047	32.2258	0
A1L0X5	Krt78 protein (Fragment) OS=Mus musculus GN=Krt78 PE=2 SV=1 - [A1L0X5_MOUSE]	7.25496	2.44	5	1	1	2	492	54.7393	6.30322
	A2	Sequence	# PSMs	# Proteins	# Protein Groups	Protein Group Accessions	Modifications	ΔCn	phosphoRS Site Probabilities	q-Value	PEP	XCorr	Charge	MH+ [Da]	ΔM [ppm]	RT [min]	# Missed Cleavages
	High	SLNNQFASFIDK	2	5	1	A1L0X5		0		0	7.245e-05	3.80602	2	1383.69	0.348486	80.8985	0
Q99LC5	Electron transfer flavoprotein subunit alpha, mitochondrial OS=Mus musculus GN=Etfa PE=1 SV=2 - [ETFA_MOUSE]	6.84264	5.71	1	1	1	2	333	34.9875	8.38232
	A2	Sequence	# PSMs	# Proteins	# Protein Groups	Protein Group Accessions	Modifications	ΔCn	phosphoRS Site Probabilities	q-Value	PEP	XCorr	Charge	MH+ [Da]	ΔM [ppm]	RT [min]	# Missed Cleavages
	High	AAVDAGFVPNDMQVGQTGK	1	1	1	Q99LC5		0		0	0.0005292	3.74853	2	1904.92	0.171539	68.8761	0
	High	AAVDAGFVPNDmQVGQTGK	1	1	1	Q99LC5	M12(Oxidation)	0		0.001	0.003011	3.09412	2	1920.91	0.466011	54.7547	0
Q5SWU9	Acetyl-CoA carboxylase 1 OS=Mus musculus GN=Acaca PE=1 SV=1 - [ACACA_MOUSE]	6.07497	1.54	4	2	2	2	2345	265.088	6.39209
	A2	Sequence	# PSMs	# Proteins	# Protein Groups	Protein Group Accessions	Modifications	ΔCn	phosphoRS Site Probabilities	q-Value	PEP	XCorr	Charge	MH+ [Da]	ΔM [ppm]	RT [min]	# Missed Cleavages
	High	ITSENPDEGFKPSSGTVQELNFR	1	3	1	Q5SWU9		0		0	0.0008038	3.01909	3	2552.23	0.678727	68.586	0
	High	EASFEYLQNEGER	1	4	1	Q5SWU9		0		0.001	0.005512	3.05588	2	1571.7	0.9396	56.1347	0
B9EIU1	Glutamyl-prolyl-tRNA synthetase OS=Mus musculus GN=Eprs PE=2 SV=1 - [B9EIU1_MOUSE]	6.05841	1.65	2	2	2	2	1512	169.856	7.59131
	A2	Sequence	# PSMs	# Proteins	# Protein Groups	Protein Group Accessions	Modifications	ΔCn	phosphoRS Site Probabilities	q-Value	PEP	XCorr	Charge	MH+ [Da]	ΔM [ppm]	RT [min]	# Missed Cleavages
	High	AIQGATSHHLGQNFSK	1	2	1	B9EIU1		0		0	7.664e-05	3.81987	2	1695.85	-1.05173	25.9166	0
	High	KPYIWEYSR	1	2	1	B9EIU1		0		0.005	0.05858	2.23854	2	1241.63	0.617233	52.5677	0
Q99MH7	Cytokeratin KRT2-6HF (Fragment) OS=Mus musculus GN=Krt75 PE=2 SV=1 - [Q99MH7_MOUSE]	5.38729	5.25	9	2	2	2	381	42.3572	5.19873
	A2	Sequence	# PSMs	# Proteins	# Protein Groups	Protein Group Accessions	Modifications	ΔCn	phosphoRS Site Probabilities	q-Value	PEP	XCorr	Charge	MH+ [Da]	ΔM [ppm]	RT [min]	# Missed Cleavages
	High	NMQEVVEDFK	1	2	1	Q99MH7		0		0.001	0.009369	2.69835	2	1238.57	0.0661437	79.9768	0
	High	YEELQVTAGR	1	9	1	Q99MH7		0		0.001	0.006016	2.68894	2	1165.58	-0.153549	41.6179	0
B7ZWL1	CCR4-NOT transcription complex subunit 1 OS=Mus musculus GN=Cnot1 PE=1 SV=1 - [B7ZWL1_MOUSE]	5.28491	0.77	9	2	2	2	2326	260.791	7.02002
	A2	Sequence	# PSMs	# Proteins	# Protein Groups	Protein Group Accessions	Modifications	ΔCn	phosphoRS Site Probabilities	q-Value	PEP	XCorr	Charge	MH+ [Da]	ΔM [ppm]	RT [min]	# Missed Cleavages
	High	NLILSAFPR	1	7	1	B7ZWL1		0		0.002	0.0268	2.86172	2	1030.6	-0.259775	82.4721	0
	High	ILDVAQDLK	1	8	1	B7ZWL1		0		0.004	0.05063	2.42319	2	1014.58	0.495171	62.5503	0
Q3UV17	Keratin, type II cytoskeletal 2 oral OS=Mus musculus GN=Krt76 PE=1 SV=1 - [K22O_MOUSE]	4.99364	1.52	1	1	1	2	594	62.806	8.42627
	A2	Sequence	# PSMs	# Proteins	# Protein Groups	Protein Group Accessions	Modifications	ΔCn	phosphoRS Site Probabilities	q-Value	PEP	XCorr	Charge	MH+ [Da]	ΔM [ppm]	RT [min]	# Missed Cleavages
	High	AQYEDIAQK	2	1	1	Q3UV17		0		0.001	0.01032	2.55675	2	1065.52	-0.10099	26.4562	0
Q5DTR4	MKIAA4049 protein (Fragment) OS=Mus musculus GN=Sptbn1 PE=2 SV=1 - [Q5DTR4_MOUSE]	4.77439	1.4	7	2	2	2	1290	150.397	5.64307
	A2	Sequence	# PSMs	# Proteins	# Protein Groups	Protein Group Accessions	Modifications	ΔCn	phosphoRS Site Probabilities	q-Value	PEP	XCorr	Charge	MH+ [Da]	ΔM [ppm]	RT [min]	# Missed Cleavages
	High	LLEVLSGER	1	7	1	Q5DTR4		0		0.002	0.02954	2.38121	2	1015.58	0.00331738	62.2623	0
	High	VAVVNQIAR	1	4	1	Q5DTR4		0		0.004	0.03817	2.39317	2	969.584	-0.135519	42.7006	0
P07724	Serum albumin OS=Mus musculus GN=Alb PE=1 SV=3 - [ALBU_MOUSE]	4.28923	2.14	1	1	1	1	608	68.6477	6.07471
	A2	Sequence	# PSMs	# Proteins	# Protein Groups	Protein Group Accessions	Modifications	ΔCn	phosphoRS Site Probabilities	q-Value	PEP	XCorr	Charge	MH+ [Da]	ΔM [ppm]	RT [min]	# Missed Cleavages
	High	LGEYGFQNAILVR	1	1	1	P07724		0		0	2.375e-06	4.28923	2	1479.8	0.053065	82.9614	0
Q3TB63	Uncharacterized protein (Fragment) OS=Mus musculus GN=Hspa8 PE=2 SV=1 - [Q3TB63_MOUSE]	3.93903	3.49	28	1	1	1	459	50.4331	6.59521
	A2	Sequence	# PSMs	# Proteins	# Protein Groups	Protein Group Accessions	Modifications	ΔCn	phosphoRS Site Probabilities	q-Value	PEP	XCorr	Charge	MH+ [Da]	ΔM [ppm]	RT [min]	# Missed Cleavages
	High	IINEPTAAAIAYGLDK	1	28	1	Q3TB63		0		0	1.015e-06	3.93903	2	1659.89	-0.208592	82.2131	0
Q3UUN4	Kinesin-like protein (Fragment) OS=Mus musculus GN=Kif1a PE=2 SV=1 - [Q3UUN4_MOUSE]	3.55881	3.74	23	1	1	1	294	32.7261	7.40088
	A2	Sequence	# PSMs	# Proteins	# Protein Groups	Protein Group Accessions	Modifications	ΔCn	phosphoRS Site Probabilities	q-Value	PEP	XCorr	Charge	MH+ [Da]	ΔM [ppm]	RT [min]	# Missed Cleavages
	High	ISLVDLAGSER	1	23	1	Q3UUN4		0		0	1.314e-05	3.55881	2	1159.63	-0.23626	76.6435	0
F7BB92	ATP-dependent Clp protease ATP-binding subunit clpX-like, mitochondrial (Fragment) OS=Mus musculus GN=Clpx PE=1 SV=1 - [F7BB92_MOUSE]	3.44046	6.77	3	1	1	1	192	20.9468	5.90967
	A2	Sequence	# PSMs	# Proteins	# Protein Groups	Protein Group Accessions	Modifications	ΔCn	phosphoRS Site Probabilities	q-Value	PEP	XCorr	Charge	MH+ [Da]	ΔM [ppm]	RT [min]	# Missed Cleavages
	High	SNILLLGPTGSGK	1	3	1	F7BB92		0		0.001	0.002235	3.44046	2	1256.72	0.72256	69.4724	0
Q6B822	Histone H4 (Fragment) OS=Mus musculus PE=3 SV=1 - [Q6B822_MOUSE]	3.39781	23.26	2	1	1	1	43	4.91284	10.9165
	A2	Sequence	# PSMs	# Proteins	# Protein Groups	Protein Group Accessions	Modifications	ΔCn	phosphoRS Site Probabilities	q-Value	PEP	XCorr	Charge	MH+ [Da]	ΔM [ppm]	RT [min]	# Missed Cleavages
	High	ISGLIYEETR	1	2	1	Q6B822		0		0	0.0004103	3.39781	2	1180.62	0.435524	55.8576	0
Q5XLR9	Lactase OS=Mus musculus GN=Lct PE=2 SV=1 - [Q5XLR9_MOUSE]	3.28041	11.22	1	1	1	1	303	34.0922	8.5874
	A2	Sequence	# PSMs	# Proteins	# Protein Groups	Protein Group Accessions	Modifications	ΔCn	phosphoRS Site Probabilities	q-Value	PEP	XCorr	Charge	MH+ [Da]	ΔM [ppm]	RT [min]	# Missed Cleavages
	High	IQSTFDFFGFNHyTTVLAYNLNYAAAVSSFDADR	1	1	1	Q5XLR9	Y13(Phospho)	0	S(3): 1.6; T(4): 4.0; Y(13): 28.6; T(14): 28.6; T(15): 28.6; Y(19): 4.0; Y(23): 4.0; S(28): 0.4; S(29): 0.4	0.002	0.01733	3.28041	4	3945.77	-1.49727	44.5484	0
E9Q5F6	Polyubiquitin-C (Fragment) OS=Mus musculus GN=Ubc PE=4 SV=1 - [E9Q5F6_MOUSE]	3.18541	23.88	17	1	1	1	201	22.5782	7.40088
	A2	Sequence	# PSMs	# Proteins	# Protein Groups	Protein Group Accessions	Modifications	ΔCn	phosphoRS Site Probabilities	q-Value	PEP	XCorr	Charge	MH+ [Da]	ΔM [ppm]	RT [min]	# Missed Cleavages
	High	TITLEVEPSDTIENVK	1	17	1	E9Q5F6		0		0	0.001292	3.18541	2	1787.93	0.906846	77.575	0
Q4FE56	Probable ubiquitin carboxyl-terminal hydrolase FAF-X OS=Mus musculus GN=Usp9x PE=1 SV=1 - [Q4FE56_MOUSE]	3.18206	0.35	4	1	1	1	2554	290.031	5.8335
	A2	Sequence	# PSMs	# Proteins	# Protein Groups	Protein Group Accessions	Modifications	ΔCn	phosphoRS Site Probabilities	q-Value	PEP	XCorr	Charge	MH+ [Da]	ΔM [ppm]	RT [min]	# Missed Cleavages
	High	FNDYFEFPR	1	4	1	Q4FE56		0		0	0.0003312	3.18206	2	1234.55	0.0913238	82.5486	0
P04104	Keratin, type II cytoskeletal 1 OS=Mus musculus GN=Krt1 PE=1 SV=4 - [K2C1_MOUSE]	3.14106	1.73	1	1	1	1	637	65.5653	8.14795
	A2	Sequence	# PSMs	# Proteins	# Protein Groups	Protein Group Accessions	Modifications	ΔCn	phosphoRS Site Probabilities	q-Value	PEP	XCorr	Charge	MH+ [Da]	ΔM [ppm]	RT [min]	# Missed Cleavages
	High	TNAENEFVTIK	1	1	1	P04104		0		0.001	0.004095	3.14106	2	1265.64	0.187629	53.5639	0
Q99KA2	Tubulin alpha chain (Fragment) OS=Mus musculus GN=Tuba1b PE=2 SV=1 - [Q99KA2_MOUSE]	2.96875	5.19	10	1	1	1	347	38.7462	5.14795
	A2	Sequence	# PSMs	# Proteins	# Protein Groups	Protein Group Accessions	Modifications	ΔCn	phosphoRS Site Probabilities	q-Value	PEP	XCorr	Charge	MH+ [Da]	ΔM [ppm]	RT [min]	# Missed Cleavages
	High	VGINYQPPTVVPGGDLAK	1	10	1	Q99KA2		0		0.001	0.001557	2.96875	2	1824.99	0.406772	79.3292	0
A2ACP1-2	Isoform 2 of Tetratricopeptide repeat protein 39A OS=Mus musculus GN=Ttc39a - [TT39A_MOUSE]	2.88783	2.08	2	1	1	1	576	65.5909	7.00537
	A2	Sequence	# PSMs	# Proteins	# Protein Groups	Protein Group Accessions	Modifications	ΔCn	phosphoRS Site Probabilities	q-Value	PEP	XCorr	Charge	MH+ [Da]	ΔM [ppm]	RT [min]	# Missed Cleavages
	High	NEEAIKLLESAK	1	2	1	A2ACP1-2		0		0.001	0.01173	2.88783	2	1344.74	-0.185438	66.5785	1
Q5PR73	GTP-binding protein Di-Ras2 OS=Mus musculus GN=Diras2 PE=1 SV=1 - [DIRA2_MOUSE]	2.87517	5.53	1	1	1	1	199	22.4836	8.76318
	A2	Sequence	# PSMs	# Proteins	# Protein Groups	Protein Group Accessions	Modifications	ΔCn	phosphoRS Site Probabilities	q-Value	PEP	XCorr	Charge	MH+ [Da]	ΔM [ppm]	RT [min]	# Missed Cleavages
	High	VAVFGAGGVGK	1	1	1	Q5PR73		0		0.001	0.006972	2.87517	2	961.547	0.00636783	59.9422	0
Q8C196	Carbamoyl-phosphate synthase [ammonia], mitochondrial OS=Mus musculus GN=Cps1 PE=1 SV=2 - [CPSM_MOUSE]	2.86119	0.67	1	1	1	1	1500	164.514	6.91748
	A2	Sequence	# PSMs	# Proteins	# Protein Groups	Protein Group Accessions	Modifications	ΔCn	phosphoRS Site Probabilities	q-Value	PEP	XCorr	Charge	MH+ [Da]	ΔM [ppm]	RT [min]	# Missed Cleavages
	High	SVGEVMAIGR	1	1	1	Q8C196		0		0.002	0.01648	2.86119	2	1018.53	-0.45929	52.0413	0
A0A0B4J1N9	E3 ubiquitin-protein ligase TRIP12 (Fragment) OS=Mus musculus GN=Trip12 PE=1 SV=5 - [A0A0B4J1N9_MOUSE]	2.77692	0.81	3	1	1	1	982	106.392	9.21729
	A2	Sequence	# PSMs	# Proteins	# Protein Groups	Protein Group Accessions	Modifications	ΔCn	phosphoRS Site Probabilities	q-Value	PEP	XCorr	Charge	MH+ [Da]	ΔM [ppm]	RT [min]	# Missed Cleavages
	High	LQALLEAR	1	3	1	A0A0B4J1N9		0		0.001	0.005512	2.77692	2	913.546	-0.23865	50.9748	0
Q3TS63	Uncharacterized protein (Fragment) OS=Mus musculus GN=Asap2 PE=2 SV=1 - [Q3TS63_MOUSE]	2.76261	1.43	7	1	1	1	559	61.7079	5.61768
	A2	Sequence	# PSMs	# Proteins	# Protein Groups	Protein Group Accessions	Modifications	ΔCn	phosphoRS Site Probabilities	q-Value	PEP	XCorr	Charge	MH+ [Da]	ΔM [ppm]	RT [min]	# Missed Cleavages
	High	EIISEVQR	1	7	1	Q3TS63		0		0.004	0.04507	2.76261	2	973.531	-0.222701	48.4584	0
D3Z6F5	ATP synthase subunit alpha OS=Mus musculus GN=Atp5a1 PE=1 SV=1 - [D3Z6F5_MOUSE]	2.73158	2.58	2	1	1	1	503	54.5607	8.23584
	A2	Sequence	# PSMs	# Proteins	# Protein Groups	Protein Group Accessions	Modifications	ΔCn	phosphoRS Site Probabilities	q-Value	PEP	XCorr	Charge	MH+ [Da]	ΔM [ppm]	RT [min]	# Missed Cleavages
	High	EAYPGDVFYLHSR	1	2	1	D3Z6F5		0		0.001	0.003587	2.73158	2	1553.74	0.136245	67.3246	0
P0CL69	Zinc finger protein 703 OS=Mus musculus GN=Znf703 PE=1 SV=1 - [ZN703_MOUSE]	2.69597	1.85	1	1	1	1	594	58.6941	8.79248
	A2	Sequence	# PSMs	# Proteins	# Protein Groups	Protein Group Accessions	Modifications	ΔCn	phosphoRS Site Probabilities	q-Value	PEP	XCorr	Charge	MH+ [Da]	ΔM [ppm]	RT [min]	# Missed Cleavages
	High	NGGGGAGELDK	1	1	1	P0CL69		0		0.002	0.01713	2.69597	2	974.458	4.71064	28.1274	0
P38647	Stress-70 protein, mitochondrial OS=Mus musculus GN=Hspa9 PE=1 SV=3 - [GRP75_MOUSE]	2.64025	1.33	1	1	1	1	679	73.4156	6.07471
	A2	Sequence	# PSMs	# Proteins	# Protein Groups	Protein Group Accessions	Modifications	ΔCn	phosphoRS Site Probabilities	q-Value	PEP	XCorr	Charge	MH+ [Da]	ΔM [ppm]	RT [min]	# Missed Cleavages
	High	VLENAEGAR	1	1	1	P38647		0		0.002	0.02855	2.64025	2	958.495	-0.131992	9.92536	0
E9Q2Z0	Sialidase-2 (Fragment) OS=Mus musculus GN=Neu2 PE=4 SV=1 - [E9Q2Z0_MOUSE]	2.63044	16.22	1	1	1	1	111	12.7548	9.51025
	A2	Sequence	# PSMs	# Proteins	# Protein Groups	Protein Group Accessions	Modifications	ΔCn	phosphoRS Site Probabilities	q-Value	PEP	XCorr	Charge	MH+ [Da]	ΔM [ppm]	RT [min]	# Missed Cleavages
	High	QtKTLFLFFIAVPGRVsE	1	1	1	E9Q2Z0	T2(Phospho); S17(Phospho)	0	T(2): 84.5; T(4): 15.5; S(17): 100.0	0.008	0.08081	2.63044	3	2213.09	3.20434	76.3488	2
G3UWL7	Histone H2A OS=Mus musculus GN=H2afz PE=1 SV=1 - [G3UWL7_MOUSE]	2.61906	10.34	17	1	1	1	87	9.11288	10.7847
	A2	Sequence	# PSMs	# Proteins	# Protein Groups	Protein Group Accessions	Modifications	ΔCn	phosphoRS Site Probabilities	q-Value	PEP	XCorr	Charge	MH+ [Da]	ΔM [ppm]	RT [min]	# Missed Cleavages
	High	AGLQFPVGR	1	17	1	G3UWL7		0		0.002	0.02173	2.61906	2	944.532	0.275734	62.6067	0
Q6PB69	Tln2 protein (Fragment) OS=Mus musculus GN=Tln2 PE=2 SV=1 - [Q6PB69_MOUSE]	2.61409	2.08	16	1	1	1	529	55.9904	5.99854
	A2	Sequence	# PSMs	# Proteins	# Protein Groups	Protein Group Accessions	Modifications	ΔCn	phosphoRS Site Probabilities	q-Value	PEP	XCorr	Charge	MH+ [Da]	ΔM [ppm]	RT [min]	# Missed Cleavages
	High	VMVTNVTSLLK	1	16	1	Q6PB69		0		0.001	0.00173	2.61409	2	1204.7	0.132692	82.6252	0
Q80TV8-2	Isoform 2 of CLIP-associating protein 1 OS=Mus musculus GN=Clasp1 - [CLAP1_MOUSE]	2.6078	1.11	2	1	1	1	1525	167.835	8.99756
	A2	Sequence	# PSMs	# Proteins	# Protein Groups	Protein Group Accessions	Modifications	ΔCn	phosphoRS Site Probabilities	q-Value	PEP	XCorr	Charge	MH+ [Da]	ΔM [ppm]	RT [min]	# Missed Cleavages
	High	RQSSGSTTNVASTPDSR	1	2	1	Q80TV8-2		0		0.002	0.02801	2.6078	2	1750.83	0.463602	78.7422	1
V9GX06	Predicted gene 11214 (Fragment) OS=Mus musculus GN=Gm11214 PE=1 SV=1 - [V9GX06_MOUSE]	2.59203	6.01	5	1	1	1	183	19.8519	7.41553
	A2	Sequence	# PSMs	# Proteins	# Protein Groups	Protein Group Accessions	Modifications	ΔCn	phosphoRS Site Probabilities	q-Value	PEP	XCorr	Charge	MH+ [Da]	ΔM [ppm]	RT [min]	# Missed Cleavages
	High	AGIALNDNFVK	1	5	1	V9GX06		0		0.002	0.01465	2.59203	2	1161.63	-0.142101	66.5705	0
Q3ULF5	Uncharacterized protein (Fragment) OS=Mus musculus GN=Top1 PE=2 SV=1 - [Q3ULF5_MOUSE]	2.57653	3.09	2	1	1	1	291	35.1141	9.33447
	A2	Sequence	# PSMs	# Proteins	# Protein Groups	Protein Group Accessions	Modifications	ΔCn	phosphoRS Site Probabilities	q-Value	PEP	XCorr	Charge	MH+ [Da]	ΔM [ppm]	RT [min]	# Missed Cleavages
	High	MLDHEYTTK	1	2	1	Q3ULF5		0		0.005	0.05965	2.57653	2	1137.52	-0.481678	21.4941	0
A0A0G2JE03	Anaphase-promoting complex subunit 5 OS=Mus musculus GN=Anapc5 PE=1 SV=1 - [A0A0G2JE03_MOUSE]	2.57269	2.78	10	1	1	1	719	80.7805	6.771
	A2	Sequence	# PSMs	# Proteins	# Protein Groups	Protein Group Accessions	Modifications	ΔCn	phosphoRS Site Probabilities	q-Value	PEP	XCorr	Charge	MH+ [Da]	ΔM [ppm]	RT [min]	# Missed Cleavages
	High	LKNTEMVISVLLSVAELYWR	1	10	1	A0A0G2JE03		0		0.008	0.08092	2.57269	3	2364.3	0.483907	59.9716	1
E9PZJ8	Activating signal cointegrator 1 complex subunit 3 OS=Mus musculus GN=Ascc3 PE=1 SV=1 - [ASCC3_MOUSE]	2.4535	0.64	1	1	1	1	2198	250.398	7.02002
	A2	Sequence	# PSMs	# Proteins	# Protein Groups	Protein Group Accessions	Modifications	ΔCn	phosphoRS Site Probabilities	q-Value	PEP	XCorr	Charge	MH+ [Da]	ΔM [ppm]	RT [min]	# Missed Cleavages
	High	LLILDEVHLLHEDR	1	1	1	E9PZJ8		0		0.001	0.001825	2.4535	2	1714.95	-0.53634	82.433	0
B1ART1	Vacuolar protein sorting 13D OS=Mus musculus GN=Vps13d PE=1 SV=1 - [B1ART1_MOUSE]	2.43627	0.28	2	1	1	1	4359	487.021	6.49365
	A2	Sequence	# PSMs	# Proteins	# Protein Groups	Protein Group Accessions	Modifications	ΔCn	phosphoRS Site Probabilities	q-Value	PEP	XCorr	Charge	MH+ [Da]	ΔM [ppm]	RT [min]	# Missed Cleavages
	High	GAVELENLPLKK	1	2	1	B1ART1		0		0.008	0.08633	2.43627	3	1310.77	-0.918966	70.7848	1
Q6PET9	DNA topoisomerase 2 (Fragment) OS=Mus musculus GN=Top2a PE=2 SV=1 - [Q6PET9_MOUSE]	2.41569	2.32	5	1	1	1	345	39.5033	8.73389
	A2	Sequence	# PSMs	# Proteins	# Protein Groups	Protein Group Accessions	Modifications	ΔCn	phosphoRS Site Probabilities	q-Value	PEP	XCorr	Charge	MH+ [Da]	ΔM [ppm]	RT [min]	# Missed Cleavages
	High	LcNIFSTK	1	5	1	Q6PET9	C2(Carbamidomethyl)	0		0.004	0.03521	2.41569	2	982.503	0.193298	55.6598	0
Q8BIX2	Uncharacterized protein OS=Mus musculus GN=Gcn1l1 PE=1 SV=1 - [Q8BIX2_MOUSE]	2.39637	0.85	5	1	1	1	1054	115.352	6.39209
	A2	Sequence	# PSMs	# Proteins	# Protein Groups	Protein Group Accessions	Modifications	ΔCn	phosphoRS Site Probabilities	q-Value	PEP	XCorr	Charge	MH+ [Da]	ΔM [ppm]	RT [min]	# Missed Cleavages
	High	VLAGLYMGR	1	5	1	Q8BIX2		0		0.002	0.03005	2.39637	2	979.54	0.263507	63.1312	0
P49025-3	Isoform 3 of Citron Rho-interacting kinase OS=Mus musculus GN=Cit - [CTRO_MOUSE]	2.38059	0.5	8	1	1	1	1597	183.335	6.60986
	A2	Sequence	# PSMs	# Proteins	# Protein Groups	Protein Group Accessions	Modifications	ΔCn	phosphoRS Site Probabilities	q-Value	PEP	XCorr	Charge	MH+ [Da]	ΔM [ppm]	RT [min]	# Missed Cleavages
	High	LIDFLQAK	1	8	1	P49025-3		0		0.008	0.08752	2.38059	2	947.555	-0.980371	78.018	0
A0A0R4J0W9	Exocyst complex component 3-like protein 4 OS=Mus musculus GN=Exoc3l4 PE=1 SV=1 - [A0A0R4J0W9_MOUSE]	2.29945	0.97	2	1	1	1	721	81.054	6.41748
	A2	Sequence	# PSMs	# Proteins	# Protein Groups	Protein Group Accessions	Modifications	ΔCn	phosphoRS Site Probabilities	q-Value	PEP	XCorr	Charge	MH+ [Da]	ΔM [ppm]	RT [min]	# Missed Cleavages
	High	HLETLIR	1	2	1	A0A0R4J0W9		0		0.005	0.06342	2.29945	2	881.52	-0.333708	33.8932	0
E9PV60	WD repeat and FYVE domain-containing 4 OS=Mus musculus GN=Wdfy4 PE=1 SV=1 - [E9PV60_MOUSE]	2.2579	0.26	2	1	1	1	3024	337.147	6.354
	A2	Sequence	# PSMs	# Proteins	# Protein Groups	Protein Group Accessions	Modifications	ΔCn	phosphoRS Site Probabilities	q-Value	PEP	XCorr	Charge	MH+ [Da]	ΔM [ppm]	RT [min]	# Missed Cleavages
	High	LSVQNLsK	1	2	1	E9PV60	S7(Phospho)	0	S(2): 0.0; S(7): 100.0	0.004	0.05261	2.2579	2	968.481	-0.465446	50.0484	0
A0A097PUD0	Anti-dectin-1 15E2 light chain OS=Mus musculus PE=2 SV=1 - [A0A097PUD0_MOUSE]	2.17916	7.66	2	1	1	1	235	25.5996	8.30908
	A2	Sequence	# PSMs	# Proteins	# Protein Groups	Protein Group Accessions	Modifications	ΔCn	phosphoRS Site Probabilities	q-Value	PEP	XCorr	Charge	MH+ [Da]	ΔM [ppm]	RT [min]	# Missed Cleavages
	High	TVAAPSVFIFPPSDEQLK	1	2	1	A0A097PUD0		0		0.002	0.0296	2.17916	2	1946.03	0.362924	86.449	0
Q9CUN8	Uncharacterized protein (Fragment) OS=Mus musculus GN=Tubb6 PE=2 SV=1 - [Q9CUN8_MOUSE]	2.10128	4.74	14	1	1	1	211	24.1786	4.85596
	A2	Sequence	# PSMs	# Proteins	# Protein Groups	Protein Group Accessions	Modifications	ΔCn	phosphoRS Site Probabilities	q-Value	PEP	XCorr	Charge	MH+ [Da]	ΔM [ppm]	RT [min]	# Missed Cleavages
	High	LAVNMVPFPR	1	14	1	Q9CUN8		0		0.002	0.02496	2.10128	2	1143.63	0.377676	82.6653	0
E9PXX5	Mitogen-activated protein kinase 4 OS=Mus musculus GN=Mapk4 PE=1 SV=1 - [E9PXX5_MOUSE]	2.08903	4.15	32	1	1	1	193	21.6403	8.1626
	A2	Sequence	# PSMs	# Proteins	# Protein Groups	Protein Group Accessions	Modifications	ΔCn	phosphoRS Site Probabilities	q-Value	PEP	XCorr	Charge	MH+ [Da]	ΔM [ppm]	RT [min]	# Missed Cleavages
	High	IGDFGLAR	1	32	1	E9PXX5		0		0.002	0.01973	2.08903	2	848.462	-0.0958882	56.1428	0
G3X922	DnaJ heat shock protein family (Hsp40) member C13 OS=Mus musculus GN=Dnajc13 PE=1 SV=1 - [G3X922_MOUSE]	2.02794	0.31	2	1	1	1	2243	254.278	6.771
	A2	Sequence	# PSMs	# Proteins	# Protein Groups	Protein Group Accessions	Modifications	ΔCn	phosphoRS Site Probabilities	q-Value	PEP	XCorr	Charge	MH+ [Da]	ΔM [ppm]	RT [min]	# Missed Cleavages
	High	IGDYYLR	1	2	1	G3X922		0		0.009	0.09586	2.02794	2	899.462	0.0494761	48.0982	0
