# Supplementary material for: MARK2 regulates Golgi apparatus reorientation by phosphorylation of CAMSAP2 in directional cell migratio
Source: eLife journal article supplement (doi:10.7554/elife.105977), 2025-03-26
Supplement: fig5-data3 [file elife-105977-fig5-data3-v1.zip]

## Sheet: 质心坐标计算
	GM130高尔基体质心	X轴	Y轴	细胞核DAPI质心	X轴	Y轴	计算	Xg	Yg	Xn	Yn	Tanb	arcTanb	b-degrees	判断位置	极坐标象限
1	划痕HT1080-2H-04hao用.czi:c:2/4 - 划痕HT1080-2H-04hao用.czi #1	32.728	73.321		39.643	71.687		32.728	73.321	39.643	71.687	4.23195	1.33875	76.705	Xg>Xn：G在N右	一二象限
2	划痕HT1080-2H-04hao用.czi:c:2/4 - 划痕HT1080-2H-04hao用.czi #1	45.271	91.107		48.109	92.937		45.271	91.107	48.109	92.937	-1.55082	-0.998071	-57.1853	Xg<Xn：G在N左	三四象限
3	划痕HT1080-2H-04hao用.czi:c:2/4 - 划痕HT1080-2H-04hao用.czi #1	73.188	92.777		66.9	89.174		73.188	92.777	66.9	89.174	1.74521	1.05047	60.1875	Yg>Yn：G在N上	一四象限
4	划痕HT1080-2H-04hao用.czi:c:2/4 - 划痕HT1080-2H-04hao用.czi #1	87.825	69.204		81.723	63.904		87.825	69.204	81.723	63.904	1.15132	0.855621	49.0235	Yg<Yn：G在N下	二三象限
5	划痕HT1080-2H-04hao用.czi:c:2/4 - 划痕HT1080-2H-04hao用.czi #1	118.772	60.908		126.003	59.548		118.772	60.908	126.003	59.548	5.31691	1.38489	79.3483		备注：极坐标有0~360或者-180~180两种。
6	划痕HT1080-2H-04hao用.czi:c:2/4 - 划痕HT1080-2H-04hao用.czi #1	144.572	68.315		150.999	61.714		144.572	68.315	150.999	61.714	0.97364	0.772043	44.2348
7	划痕HT1080-2H-04hao用.czi:c:2/4 - 划痕HT1080-2H-04hao用.czi #1	186.719	74.117		182.077	66.153		186.719	74.117	182.077	66.153	0.582873	0.527731	30.2368
8	划痕HT1080-2H-04hao用.czi:c:2/4 - 划痕HT1080-2H-04hao用.czi #1	211.749	62.398		219.496	59.045		211.749	62.398	219.496	59.045	2.31047	1.16233	66.5964

## Sheet: CS2KO-HT1080质心不用
CS2KO-HT1080质心坐标		高尔基体Xg	Yg	细胞核Xn	Yn	Tanb	arcTanb	b-degrees	|b-degrees|	象限1	象限3	象限2	象限4	象限求和	加90度	360角度	Distance	14象限	总和	比例
划痕CS2KOHT1080-2H-05HAO.czi:c:2/4 - 划痕CS2KOHT1080-2H-05HAO.czi #1		19.539	36.979	18.016	37.56	-2.62134	-1.20635	-69.119	69.119	0	0	2	0	2	90	159.119	1.63006	9	18	0.277778
划痕CS2KOHT1080-2H-05HAO.czi:c:2/4 - 划痕CS2KOHT1080-2H-05HAO.czi #1		49.674	42.07	51.359	39.24	0.595406	0.537035	30.7698	30.7698	0	0	0	4	4	270	300.77	3.29365
划痕CS2KOHT1080-2H-05HAO.czi:c:2/4 - 划痕CS2KOHT1080-2H-05HAO.czi #1		89.297	52.191	93.341	52.232	-98.6341	-1.56066	-89.4191	89.4191	0	3	0	0	3	180	269.419	4.04421
划痕CS2KOHT1080-2H-05HAO.czi:c:2/4 - 划痕CS2KOHT1080-2H-05HAO.czi #1		118.997	59.531	117.798	54.961	0.262363	0.25658	14.701	14.701	1	0	0	0	1	0	14.701	4.72467
划痕CS2KOHT1080-2H-05HAO.czi:c:2/4 - 划痕CS2KOHT1080-2H-05HAO.czi #1		136.438	65.217	130.796	70.196	-1.13316	-0.847741	-48.572	48.572	0	0	2	0	2	90	138.572	7.5248
划痕CS2KOHT1080-2H-05HAO.czi:c:2/4 - 划痕CS2KOHT1080-2H-05HAO.czi #1		161.52	59.526	171.598	57.997	6.59124	1.42023	81.3731	81.3731	0	0	0	4	4	270	351.373	10.1933
划痕CS2KOHT1080-2H-08-2反-2岁-2正.czi:c:2/4 - 划痕CS2KOHT1080-2H-08-2反-2岁-2正.czi #1		9.806	70.204	15.342	74.978	-1.15961	-0.859173	-49.227	49.227	0	3	0	0	3	180	229.227	7.31016
划痕CS2KOHT1080-2H-08-2反-2岁-2正.czi:c:2/4 - 划痕CS2KOHT1080-2H-08-2反-2岁-2正.czi #1		64.898	80.728	67.553	85.105	-0.60658	-0.545244	-31.2402	31.2402	0	3	0	0	3	180	211.24	5.11929
划痕CS2KOHT1080-2H-08-2反-2岁-2正.czi:c:2/4 - 划痕CS2KOHT1080-2H-08-2反-2岁-2正.czi #1		101.02	74.053	102.909	67.671	0.295989	0.287773	16.4882	16.4882	0	0	0	4	4	270	286.488	6.65569
划痕CS2KOHT1080-2H-08-2反-2岁-2正.czi:c:2/4 - 划痕CS2KOHT1080-2H-08-2反-2岁-2正.czi #1		127.007	88.063	118.346	84.133	2.20382	1.14482	65.5934	65.5934	1	0	0	0	1	0	65.5934	9.51093
划痕CS2KOHT1080-2H-08-2反-2岁-2正.czi:c:2/4 - 划痕CS2KOHT1080-2H-08-2反-2岁-2正.czi #1		171.92	92.5	174.555	87.888	0.571336	0.519076	29.7409	29.7409	0	0	0	4	4	270	299.741	5.31166
划痕CS2KOHT1080-2H-08-2反-2岁-2正.czi:c:2/4 - 划痕CS2KOHT1080-2H-08-2反-2岁-2正.czi #1		207.471	87.187	211.392	90.433	-1.20795	-0.879303	-50.3803	50.3803	0	3	0	0	3	180	230.38	5.09026
划痕CS2KOHT1080-2H-12-3碎-1正.czi:c:2/4 - 划痕CS2KOHT1080-2H-12-3碎-1正.czi #1		15.768	98.631	16.081	94.289	0.0720866	0.0719621	4.12313	4.12313	0	0	0	4	4	270	274.123	4.35327
划痕CS2KOHT1080-2H-12-3碎-1正.czi:c:2/4 - 划痕CS2KOHT1080-2H-12-3碎-1正.czi #1		59.666	86.119	60.204	86.278	-3.38365	-1.28344	-73.5355	73.5355	0	3	0	0	3	180	253.536	0.561004
划痕CS2KOHT1080-2H-12-3碎-1正.czi:c:2/4 - 划痕CS2KOHT1080-2H-12-3碎-1正.czi #1		100.778	103.555	106.849	98.119	1.11681	0.840526	48.1586	48.1586	0	0	0	4	4	270	318.159	8.14906
划痕CS2KOHT1080-2H-12-3碎-1正.czi:c:2/4 - 划痕CS2KOHT1080-2H-12-3碎-1正.czi #1		105.29	69.671	99.135	74.944	-1.16727	-0.862424	-49.4133	49.4133	0	0	2	0	2	90	139.413	8.10485
划痕CS2KOHT1080-2H-12-3碎-1正.czi:c:2/4 - 划痕CS2KOHT1080-2H-12-3碎-1正.czi #1		188.692	90.416	193.839	88.536	2.73777	1.22059	69.9347	69.9347	0	0	0	4	4	270	339.935	5.4796
划痕CS2KOHT1080-2H-12-3碎-1正.czi:c:2/4 - 划痕CS2KOHT1080-2H-12-3碎-1正.czi #1		217.335	60.626	218.137	69.823	-0.0872023	-0.0869823	-4.98372	4.98372	0	3	0	0	3	180	184.984	9.2319
划痕CS2KOHT1080-2H-13HAO.czi:c:2/4 - 划痕CS2KOHT1080-2H-13HAO.czi #1		76.335	91.642	79.981	96.728	-0.71687	-0.621959	-35.6356	35.6356	0	3	0	0	3	180	215.636	6.25785	11	23	0.478261
划痕CS2KOHT1080-2H-13HAO.czi:c:2/4 - 划痕CS2KOHT1080-2H-13HAO.czi #1		100.755	69.468	107.047	78.687	-0.682504	-0.598887	-34.3137	34.3137	0	3	0	0	3	180	214.314	11.1615
划痕CS2KOHT1080-2H-13HAO.czi:c:2/4 - 划痕CS2KOHT1080-2H-13HAO.czi #1		140.61	77.569	141.388	79.45	-0.41361	-0.392184	-22.4705	22.4705	0	3	0	0	3	180	202.47	2.03555
划痕CS2KOHT1080-2H-13HAO.czi:c:2/4 - 划痕CS2KOHT1080-2H-13HAO.czi #1		172.792	80.346	166.541	75.932	1.41618	0.95597	54.7731	54.7731	1	0	0	0	1	0	54.7731	7.65235
划痕CS2KOHT1080-2H-13HAO.czi:c:2/4 - 划痕CS2KOHT1080-2H-13HAO.czi #1		200.582	41.353	201.042	44.719	-0.136661	-0.135819	-7.78188	7.78188	0	3	0	0	3	180	187.782	3.39729
划痕CS2KOHT1080-2H-20HAO.czi:c:2/4 - 划痕CS2KOHT1080-2H-20HAO.czi #1		28.95	72.346	36.755	75.506	-2.46994	-1.1861	-67.9585	67.9585	0	3	0	0	3	180	247.959	8.42043
划痕CS2KOHT1080-2H-20HAO.czi:c:2/4 - 划痕CS2KOHT1080-2H-20HAO.czi #1		58.084	71.162	64.44	74.693	-1.80006	-1.06371	-60.9462	60.9462	0	3	0	0	3	180	240.946	7.27095
划痕CS2KOHT1080-2H-20HAO.czi:c:2/4 - 划痕CS2KOHT1080-2H-20HAO.czi #1		108.292	85.962	103.89	85.52	9.95928	1.47072	84.2662	84.2662	1	0	0	0	1	0	84.2662	4.42413
划痕CS2KOHT1080-2H-20HAO.czi:c:2/4 - 划痕CS2KOHT1080-2H-20HAO.czi #1		139.583	87.176	153.479	84.999	6.3831	1.4154	81.0962	81.0962	0	0	0	4	4	270	351.096	14.0655
划痕CS2KOHT1080-2H-20HAO.czi:c:2/4 - 划痕CS2KOHT1080-2H-20HAO.czi #1		187.676	91.522	195.531	100.429	-0.881891	-0.722719	-41.4088	41.4088	0	3	0	0	3	180	221.409	11.8758
划痕CS2KOHT1080-2H-21用.czi:c:2/4 - 划痕CS2KOHT1080-2H-21用.czi #1		100.634	72.402	98.967	77.849	-0.30604	-0.296989	-17.0162	17.0162	0	0	2	0	2	90	107.016	5.69638
划痕CS2KOHT1080-2H-21用.czi:c:2/4 - 划痕CS2KOHT1080-2H-21用.czi #1		131.973	75.52	135.081	79.025	-0.886733	-0.725437	-41.5645	41.5645	0	3	0	0	3	180	221.564	4.68452
划痕CS2KOHT1080-2H-21用.czi:c:2/4 - 划痕CS2KOHT1080-2H-21用.czi #1		162.164	89.796	157.908	83.199	0.645142	0.572952	32.8278	32.8278	1	0	0	0	1	0	32.8278	7.85073
划痕CS2KOHT1080-2H-21用.czi:c:1/4 - 划痕CS2KOHT1080-2H-21用.czi #1		200.039	63.136	194.277	59.309	1.50562	0.984518	56.4087	56.4087	1	0	0	0	1	0	56.4087	6.91712
划痕CS2KOHT1080-2H-22用.czi:c:2/4 - 划痕CS2KOHT1080-2H-22用.czi #1		16.153	82.506	16.538	89.293	-0.0567261	-0.0566654	-3.24669	3.24669	0	3	0	0	3	180	183.247	6.79791
划痕CS2KOHT1080-2H-22用.czi:c:2/4 - 划痕CS2KOHT1080-2H-22用.czi #1		78.619	77.161	72.501	76.302	7.12224	1.4313	82.0076	82.0076	1	0	0	0	1	0	82.0076	6.17801
划痕CS2KOHT1080-2H-22用.czi:c:2/4 - 划痕CS2KOHT1080-2H-22用.czi #1		111.921	84.712	105.596	82.611	3.01047	1.25009	71.6249	71.6249	1	0	0	0	1	0	71.6249	6.66482
划痕CS2KOHT1080-2H-22用.czi:c:2/4 - 划痕CS2KOHT1080-2H-22用.czi #1		143.244	89.937	136.859	87.522	2.64389	1.2092	69.2819	69.2819	1	0	0	0	1	0	69.2819	6.82645
划痕CS2KOHT1080-2H-29用.czi:c:2/4 - 划痕CS2KOHT1080-2H-29用.czi #1		34.223	63.307	26.858	60.963	3.14206	1.26267	72.3457	72.3457	1	0	0	0	1	0	72.3457	7.72901
划痕CS2KOHT1080-2H-29用.czi:c:2/4 - 划痕CS2KOHT1080-2H-29用.czi #1		71.125	50.167	76.043	56.129	-0.824891	-0.689735	-39.5189	39.5189	0	3	0	0	3	180	219.519	7.72866
划痕CS2KOHT1080-2H-29用.czi:c:2/4 - 划痕CS2KOHT1080-2H-29用.czi #1		116.79	86.864	112.844	91.459	-0.85876	-0.709557	-40.6546	40.6546	0	0	2	0	2	90	130.655	6.05681
划痕CS2KOHT1080-2H-29用.czi:c:2/4 - 划痕CS2KOHT1080-2H-29用.czi #1		150.929	91.137	157.004	90.289	7.16392	1.4321	82.0535	82.0535	0	0	0	4	4	270	352.054	6.1339
划痕CS2KOHT1080-2H-29用.czi:c:2/4 - 划痕CS2KOHT1080-2H-29用.czi #1		188.392	91.924	182.834	91.578	16.0636	1.50862	86.4378	86.4378	1	0	0	0	1	0	86.4378	5.56876
划痕CS2KOHT1080-2H-01用.czi:c:2/4 - 划痕CS2KOHT1080-2H-01用.czi #1		10.903	69.272	13.222	74.052	-0.485146	-0.451694	-25.8802	25.8802	0	3	0	0	3	180	205.88	5.31283	12	21	0.571429
划痕CS2KOHT1080-2H-01用.czi:c:2/4 - 划痕CS2KOHT1080-2H-01用.czi #1		73.086	76.598	64.843	72.48	2.0017	1.10749	63.4544	63.4544	1	0	0	0	1	0	63.4544	9.21439
划痕CS2KOHT1080-2H-01用.czi:c:2/4 - 划痕CS2KOHT1080-2H-01用.czi #1		117.509	81.138	120.44	76.483	0.629646	0.561933	32.1964	32.1964	0	0	0	4	4	270	302.196	5.50089
划痕CS2KOHT1080-2H-01用.czi:c:2/4 - 划痕CS2KOHT1080-2H-01用.czi #1		153.454	75.788	157.681	79.189	-1.24287	-0.893263	-51.1802	51.1802	0	3	0	0	3	180	231.18	5.42534
划痕CS2KOHT1080-2H-02用.czi:c:2/4 - 划痕CS2KOHT1080-2H-02用.czi #1		26.385	97.53	20.062	96.588	6.71231	1.4229	81.5264	81.5264	1	0	0	0	1	0	81.5264	6.39278
划痕CS2KOHT1080-2H-02用.czi:c:2/4 - 划痕CS2KOHT1080-2H-02用.czi #1		59.882	93.662	64.383	98.66	-0.90056	-0.733125	-42.0049	42.0049	0	3	0	0	3	180	222.005	6.72599
划痕CS2KOHT1080-2H-02用.czi:c:2/4 - 划痕CS2KOHT1080-2H-02用.czi #1		105.33	56.807	101.176	62.795	-0.693721	-0.606499	-34.7498	34.7498	0	0	2	0	2	90	124.75	7.28779
划痕CS2KOHT1080-2H-02用.czi:c:2/4 - 划痕CS2KOHT1080-2H-02用.czi #1		142.773	69.959	150.088	67.695	3.23101	1.27065	72.8027	72.8027	0	0	0	4	4	270	342.803	7.65734
划痕CS2KOHT1080-2H-02用.czi:c:2/4 - 划痕CS2KOHT1080-2H-02用.czi #1		175.722	60.078	182.978	57.542	2.8612	1.23456	70.7353	70.7353	0	0	0	4	4	270	340.735	7.68641
划痕CS2KOHT1080-2H-02用.czi:c:2/4 - 划痕CS2KOHT1080-2H-02用.czi #1		217.112	73.888	209.164	66.387	1.05959	0.814324	46.6573	46.6573	1	0	0	0	1	0	46.6573	10.9287
划痕CS2KOHT1080-2H-02用.czi:c:2/4 - 划痕CS2KOHT1080-2H-07用.czi#1		26.124	99.24	20.123	98.862	15.8757	1.50789	86.3957	86.3957	1	0	0	0	1	0	86.3957	6.01289
划痕CS2KOHT1080-2H-02用.czi:c:2/4 - 划痕CS2KOHT1080-2H-07用.czi#1		60.639	95.502	64.795	100.281	-0.869638	-0.715785	-41.0115	41.0115	0	3	0	0	3	180	221.011	6.33334
划痕CS2KOHT1080-2H-02用.czi:c:2/4 - 划痕CS2KOHT1080-2H-07用.czi#1		106.105	58.927	101.546	64.588	-0.805335	-0.677985	-38.8457	38.8457	0	0	2	0	2	90	128.846	7.26852
划痕CS2KOHT1080-2H-02用.czi:c:2/4 - 划痕CS2KOHT1080-2H-07用.czi#1		143.326	71.724	150.493	69.685	3.51496	1.29362	74.119	74.119	0	0	0	4	4	270	344.119	7.4514
划痕CS2KOHT1080-2H-02用.czi:c:2/4 - 划痕CS2KOHT1080-2H-07用.czi#1		176.604	62.239	183.223	59.409	2.33887	1.16676	66.8505	66.8505	0	0	0	4	4	270	336.851	7.19862
划痕CS2KOHT1080-2H-02用.czi:c:2/4 - 划痕CS2KOHT1080-2H-07用.czi#1		217.431	75.948	209.619	67.941	0.975646	0.773072	44.2938	44.2938	1	0	0	0	1	0	44.2938	11.1866
划痕CS2KOHT1080-2H-25用.czi:c:1/4 - 划痕CS2KOHT1080-2H-25用.czi #1		28.897	76.697	32.828	78.063	-2.87775	-1.23636	-70.838	70.838	0	3	0	0	3	180	250.838	4.16158
划痕CS2KOHT1080-2H-25用.czi:c:1/4 - 划痕CS2KOHT1080-2H-25用.czi #1		89.411	68.008	80.48	66.643	6.54286	1.41913	81.3102	81.3102	1	0	0	0	1	0	81.3102	9.03471
划痕CS2KOHT1080-2H-25用.czi:c:1/4 - 划痕CS2KOHT1080-2H-25用.czi #1		115.485	73.3	120.941	78.657	-1.01848	-0.794554	-45.5246	45.5246	0	3	0	0	3	180	225.525	7.64627
划痕CS2KOHT1080-2H-25用.czi:c:1/4 - 划痕CS2KOHT1080-2H-25用.czi #1		161.764	60.473	158.482	60.479	-547	-1.56897	-89.8953	89.8953	0	0	2	0	2	90	179.895	3.28201
划痕CS2KOHT1080-2H-25用.czi:c:1/4 - 划痕CS2KOHT1080-2H-25用.czi #1		201.782	50.067	201.394	47.523	0.152516	0.151349	8.67168	8.67168	1	0	0	0	1	0	8.67168	2.57342

## Sheet: HT1080-1质心不用
	HT1080-1质心坐标	高尔基体Xg	Yg	细胞核Xn	Yn	Tanb	arcTanb	b-degrees	|b-degrees|	象限1	象限3	象限2	象限4	象限求和	加90度	360角度	Distance	14象限	总和	比例
1	划痕HT1080-2H-04hao用.czi:c:2/4 - 划痕HT1080-2H-04hao用.czi #1	32.728	73.321	39.643	71.687	4.23195	1.33875	76.705	76.705	0	0	0	4	4	270	346.705	7.10543	13	14		0.928571
2	划痕HT1080-2H-04hao用.czi:c:2/4 - 划痕HT1080-2H-04hao用.czi #1	45.271	91.107	48.109	92.937	-1.55082	-0.998071	-57.1853	57.1853	0	3	0	0	3	180	237.185	3.37685
3	划痕HT1080-2H-04hao用.czi:c:2/4 - 划痕HT1080-2H-04hao用.czi #1	73.188	92.777	66.9	89.174	1.74521	1.05047	60.1875	60.1875	1	0	0	0	1	0	60.1875	7.24711
4	划痕HT1080-2H-04hao用.czi:c:2/4 - 划痕HT1080-2H-04hao用.czi #1	87.825	69.204	81.723	63.904	1.15132	0.855621	49.0235	49.0235	1	0	0	0	1	0	49.0235	8.08235
5	划痕HT1080-2H-04hao用.czi:c:2/4 - 划痕HT1080-2H-04hao用.czi #1	118.772	60.908	126.003	59.548	5.31691	1.38489	79.3483	79.3483	0	0	0	4	4	270	349.348	7.35778
6	划痕HT1080-2H-04hao用.czi:c:2/4 - 划痕HT1080-2H-04hao用.czi #1	144.572	68.315	150.999	61.714	0.97364	0.772043	44.2348	44.2348	0	0	0	4	4	270	314.235	9.21301
7	划痕HT1080-2H-04hao用.czi:c:2/4 - 划痕HT1080-2H-04hao用.czi #1	186.719	74.117	182.077	66.153	0.582873	0.527731	30.2368	30.2368	1	0	0	0	1	0	30.2368	9.21811
8	划痕HT1080-2H-04hao用.czi:c:2/4 - 划痕HT1080-2H-04hao用.czi #1	211.749	62.398	219.496	59.045	2.31047	1.16233	66.5964	66.5964	0	0	0	4	4	270	336.596	8.44148
9	划痕HT1080-2H-10.czi:c:2/4 - 划痕HT1080-2H-10.czi #1	11.796	69.952	11.44	62.769	0.0495615	0.0495209	2.83734	2.83734	1	0	0	0	1	0	2.83734	7.19182
10	划痕HT1080-2H-10.czi:c:2/4 - 划痕HT1080-2H-10.czi #1	38.647	46.833	40.372	39.61	0.23882	0.234429	13.4318	13.4318	0	0	0	4	4	270	283.432	7.42613
11	划痕HT1080-2H-10.czi:c:2/4 - 划痕HT1080-2H-10.czi #1	63.969	61.513	68.866	53.138	0.584716	0.529106	30.3155	30.3155	0	0	0	4	4	270	300.316	9.70161
12	划痕HT1080-2H-10.czi:c:2/4 - 划痕HT1080-2H-10.czi #1	101.339	71.235	92.783	66.982	2.01176	1.10949	63.569	63.569	1	0	0	0	1	0	63.569	9.55474
13	划痕HT1080-2H-10.czi:c:2/4 - 划痕HT1080-2H-10.czi #1	148.482	82.33	153.696	75.485	0.761724	0.650962	37.2974	37.2974	0	0	0	4	4	270	307.297	8.60464
14	划痕HT1080-2H-10.czi:c:2/4 - 划痕HT1080-2H-10.czi #1	211.619	90.588	216.173	82.782	0.583397	0.528122	30.2592	30.2592	0	0	0	4	4	270	300.259	9.03729
15	划痕HT1080-2H-25haoBUYONG.czi:c:2/4 - 划痕HT1080-2H-25haoBUYONG.czi #1	7.898	69.525	14.492	66.94	2.55087	1.19719	68.5937	68.5937	0	0	0	4	4	270	338.594	7.08259	16	19		0.842105
16	划痕HT1080-2H-25haoBUYONG.czi:c:2/4 - 划痕HT1080-2H-25haoBUYONG.czi #1	35.672	100.305	39.414	94.546	0.649766	0.57621	33.0144	33.0144	0	0	0	4	4	270	303.014	6.86794
17	划痕HT1080-2H-25haoBUYONG.czi:c:2/4 - 划痕HT1080-2H-25haoBUYONG.czi #1	54.651	74.045	55.813	67.105	0.167435	0.165896	9.50516	9.50516	0	0	0	4	4	270	279.505	7.03661
18	划痕HT1080-2H-25haoBUYONG.czi:c:2/4 - 划痕HT1080-2H-25haoBUYONG.czi #1	96.788	86.856	95.786	79.838	0.142776	0.141817	8.12553	8.12553	1	0	0	0	1	0	8.12553	7.08917
19	划痕HT1080-2H-25haoBUYONG.czi:c:2/4 - 划痕HT1080-2H-25haoBUYONG.czi #1	125.048	78.423	118.816	77.638	7.93885	1.44549	82.8207	82.8207	1	0	0	0	1	0	82.8207	6.28125
20	划痕HT1080-2H-25haoBUYONG.czi:c:2/4 - 划痕HT1080-2H-25haoBUYONG.czi #1	161.647	78.244	159.014	70.327	0.332575	0.321068	18.3959	18.3959	1	0	0	0	1	0	18.3959	8.34336
21	划痕HT1080-2H-25haoBUYONG.czi:c:2/4 - 划痕HT1080-2H-25haoBUYONG.czi #1	194.579	90.72	188.46	88.737	3.08573	1.2574	72.0439	72.0439	1	0	0	0	1	0	72.0439	6.4323
22	划痕HT1080-2H-35好.czi:c:2/4 - 划痕HT1080-2H-35好.czi #1	11.92	88.05	13.304	85.819	0.62035	0.555248	31.8134	31.8134	0	0	0	4	4	270	301.813	2.62542
23	划痕HT1080-2H-35好.czi:c:2/4 - 划痕HT1080-2H-35好.czi #1	7.453	72.166	17.495	65.132	1.42764	0.959763	54.9904	54.9904	0	0	0	4	4	270	324.99	12.2605
24	划痕HT1080-2H-35好.czi:c:2/4 - 划痕HT1080-2H-35好.czi #1	77.847	69.922	74.967	62.19	0.372478	0.356558	20.4293	20.4293	1	0	0	0	1	0	20.4293	8.25095
25	划痕HT1080-2H-35好.czi:c:2/4 - 划痕HT1080-2H-35好.czi #1	127.537	66.91	121.084	62.016	1.31855	0.921936	52.8231	52.8231	1	0	0	0	1	0	52.8231	8.09892
26	划痕HT1080-2H-35好.czi:c:2/4 - 划痕HT1080-2H-35好.czi #1	163.468	81.88	160.75	76.559	0.510806	0.472255	27.0582	27.0582	1	0	0	0	1	0	27.0582	5.97499
27	划痕HT1080-2H-35好.czi:c:2/4 - 划痕HT1080-2H-35好.czi #1	187.334	73.393	180.602	79.049	-1.19024	-0.872039	-49.9642	49.9642	0	0	2	0	2	90	139.964	8.79262
28	划痕HT1080-2H-35好.czi:c:2/4 - 划痕HT1080-2H-35好.czi #1	213.604	62.052	219.453	58.634	1.71123	1.04195	59.6991	59.6991	0	0	0	4	4	270	329.699	6.77448
29	划痕HT1080-2H-38前.czi:c:2/4 - 划痕HT1080-2H-38前.czi #1	90.664	46.947	88.335	41.046	0.394679	0.375911	21.5381	21.5381	1	0	0	0	1	0	21.5381	6.34398
30	划痕HT1080-2H-38前.czi:c:2/4 - 划痕HT1080-2H-38前.czi #1	123.178	26.807	114.07	23.765	2.99408	1.24845	71.5311	71.5311	1	0	0	0	1	0	71.5311	9.60257
31	划痕HT1080-2H-38前.czi:c:2/4 - 划痕HT1080-2H-38前.czi #1	139.059	14.463	144.685	11.896	2.19166	1.14274	65.474	65.474	0	0	0	4	4	270	335.474	6.18396
32	划痕HT1080-2H-38前.czi:c:2/4 - 划痕HT1080-2H-38前.czi #1	164.511	28.524	158.825	24.189	1.31165	0.919407	52.6781	52.6781	1	0	0	0	1	0	52.6781	7.15002
33	划痕HT1080-2H-38前.czi:c:2/4 - 划痕HT1080-2H-38前.czi #1	200.3	37.785	195.451	35.066	1.78338	1.05975	60.7192	60.7192	1	0	0	0	1	0	60.7192	5.5593
34	划痕HT1080-2H-42用.czi:c:2/4 - 划痕HT1080-2H-42用.czi #1	7.314	64.341	11.584	57.254	0.602512	0.542264	31.0695	31.0695	0	0	0	4	4	270	301.069	8.27396	18	20		0.9
35	划痕HT1080-2H-42用.czi:c:2/4 - 划痕HT1080-2H-42用.czi #1	70.979	91.363	75.824	91.412	-98.8776	-1.56068	-89.4206	89.4206	0	3	0	0	3	180	269.421	4.84525
36	划痕HT1080-2H-42用.czi:c:2/4 - 划痕HT1080-2H-42用.czi #1	105.666	73.619	113.135	74.62	-7.46154	-1.43757	-82.3667	82.3667	0	3	0	0	3	180	262.367	7.53578
37	划痕HT1080-2H-42用.czi:c:2/4 - 划痕HT1080-2H-42用.czi #1	133.26	73.646	133.689	67.382	0.0684866	0.0683798	3.91787	3.91787	0	0	0	4	4	270	273.918	6.27867
38	划痕HT1080-2H-42用.czi:c:2/4 - 划痕HT1080-2H-42用.czi #1	158.119	77.74	151.777	75.182	2.47928	1.18741	68.0337	68.0337	1	0	0	0	1	0	68.0337	6.83844
39	划痕HT1080-2H-42用.czi:c:2/4 - 划痕HT1080-2H-42用.czi #1	195.491	84.665	197.19	76.901	0.21883	0.215435	12.3435	12.3435	0	0	0	4	4	270	282.343	7.94772
40	划痕HT1080-2H-45hao.czi:c:2/4 - 划痕HT1080-2H-45hao.czi #1	111.393	90.433	110.807	83.528	0.084866	0.0846632	4.85084	4.85084	1	0	0	0	1	0	4.85084	6.92982
41	划痕HT1080-2H-45hao.czi:c:2/4 - 划痕HT1080-2H-45hao.czi #1	144.68	64.093	144.316	55.963	0.0447724	0.0447426	2.56356	2.56356	1	0	0	0	1	0	2.56356	8.13814
42	划痕HT1080-2H-45hao.czi:c:2/4 - 划痕HT1080-2H-45hao.czi #1	175.922	59.644	168.787	53.62	1.18443	0.869627	49.826	49.826	1	0	0	0	1	0	49.826	9.33792
43	划痕HT1080-2H-45hao.czi:c:2/4 - 划痕HT1080-2H-45hao.czi #1	217.64	77.847	212.83	73.684	1.15542	0.857379	49.1242	49.1242	1	0	0	0	1	0	49.1242	6.36134
44	划痕HT1080-2H-03.czi:c:1/4 - 划痕HT1080-2H-03.czi #1	13.784	82.918	13.045	75.756	0.103183	0.10282	5.89113	5.89113	1	0	0	0	1	0	5.89113	7.20003
45	划痕HT1080-2H-03.czi:c:1/4 - 划痕HT1080-2H-03.czi #1	77.906	91.958	72.613	87.356	1.15015	0.855118	48.9947	48.9947	1	0	0	0	1	0	48.9947	7.01386
46	划痕HT1080-2H-03.czi:c:1/4 - 划痕HT1080-2H-03.czi #1	124.657	59.543	120.27	55.981	1.23161	0.888815	50.9253	50.9253	1	0	0	0	1	0	50.9253	5.65098
47	划痕HT1080-2H-03.czi:c:1/4 - 划痕HT1080-2H-03.czi #1	158.557	59.054	164.167	54.882	1.34468	0.931357	53.3629	53.3629	0	0	0	4	4	270	323.363	6.99126
48	划痕HT1080-2H-03.czi:c:1/4 - 划痕HT1080-2H-03.czi #1	182.672	68.934	180.24	63.028	0.411785	0.390624	22.3811	22.3811	1	0	0	0	1	0	22.3811	6.38713
49	划痕HT1080-2H-03.czi:c:1/4 - 划痕HT1080-2H-03.czi #1	195.849	83.472	191.869	79.752	1.06989	0.819152	46.9339	46.9339	1	0	0	0	1	0	46.9339	5.44783
50	划痕HT1080-2H-23.czi:c:4/4 - 划痕HT1080-2H-23.czi #1	17.381	88.759	20.384	81.509	0.414207	0.392693	22.4997	22.4997	0	0	0	4	4	270	292.5	7.84732
51	划痕HT1080-2H-23.czi:c:4/4 - 划痕HT1080-2H-23.czi #1	47.57	80.489	50.571	70.288	0.294187	0.286115	16.3932	16.3932	0	0	0	4	4	270	286.393	10.6333
52	划痕HT1080-2H-23.czi:c:4/4 - 划痕HT1080-2H-23.czi #1	95.249	84.543	94.217	76.683	0.131298	0.130551	7.48002	7.48002	1	0	0	0	1	0	7.48002	7.92746
53	划痕HT1080-2H-23.czi:c:4/4 - 划痕HT1080-2H-23.czi #1	171.689	127.056	174.866	124.323	1.16246	0.860384	49.2964	49.2964	0	0	0	4	4	270	319.296	4.19078

## Sheet: ht1080
	HT1080-2质心	Xg	Yg	Xn	Yn	Tanb	arcTanb	b-degrees	|b-degrees|	象限1	象限3	象限2	象限4	象限求和	加90度	360角度	Distance	14象限数量	总数
	HT1080-2h-2.czi:c:1/3 - HT1080-2h-2.czi #1	33.637	58.609	37.31	50.307	0.442424	0.416535	23.8657	23.8657	0	0	0	4	4	270	293.866	9.07822	12	14		0.857
	HT1080-2h-2.czi:c:1/3 - HT1080-2h-2.czi #1	53.787	74.124	54.984	66.421	0.155394	0.154161	8.83278	8.83278	0	0	0	4	4	270	278.833	7.79545
	HT1080-2h-2.czi:c:1/3 - HT1080-2h-2.czi #1	71.159	78.733	75.445	71.749	0.613688	0.550424	31.537	31.537	0	0	0	4	4	270	301.537	8.19427
	HT1080-2h-2.czi:c:1/3 - HT1080-2h-2.czi #1	96.525	86.579	94.63	79.823	0.280491	0.273464	15.6684	15.6684	1	0	0	0	1	0	15.6684	7.01673
	HT1080-2h-2.czi:c:1/3 - HT1080-2h-2.czi #1	141.243	76.636	145.609	69.694	0.628925	0.561417	32.1668	32.1668	0	0	0	4	4	270	302.167	8.20081
	HT1080-2h-2.czi:c:1/3 - HT1080-2h-2.czi #1	102.428	68.209	110.168	61.814	1.21032	0.880266	50.4355	50.4355	0	0	0	4	4	270	320.436	10.0401
1	HT1080-2h-1.czi:c:1/3 - HT1080-2h-1.czi #1	113.865	81.794	51.139	92.062	-6.10888	-1.40854	-80.7034	80.7034	0	0	2	0	2	90	170.703	63.5609
3	HT1080-2h-1.czi:c:1/3 - HT1080-2h-1.czi #1	102.191	90.084	101.454	83.905	0.119275	0.118714	6.80182	6.80182	1	0	0	0	1	0	6.80182	6.2228
4	HT1080-2h-1.czi:c:1/3 - HT1080-2h-1.czi #1	119.58	101.559	126.065	103.106	-4.19198	-1.33662	-76.5828	76.5828	0	3	0	0	3	180	256.583	6.66697
5	HT1080-2h-1.czi:c:1/3 - HT1080-2h-1.czi #1	145.285	125.931	136.126	124.494	6.3737	1.41517	81.0833	81.0833	1	0	0	0	1	0	81.0833	9.27104
6	HT1080-2h-1.czi:c:1/3 - HT1080-2h-1.czi #1	164.769	102.08	159.23	93.551	0.649431	0.575975	33.001	33.001	1	0	0	0	1	0	33.001	10.1698
	HT1080-2h-4.czi:c:1/3 - HT1080-2h-4.czi #1	5.19	124.775	5.807	114.538	0.0602716	0.0601987	3.44913	3.44913	0	0	0	4	4	270	273.449	10.2556
	HT1080-2h-4.czi:c:1/3 - HT1080-2h-4.czi #1	16.028	96.863	20.324	90.08	0.633348	0.56458	32.348	32.348	0	0	0	4	4	270	302.348	8.02899
	HT1080-2h-4.czi:c:1/3 - HT1080-2h-4.czi #1	32.73	101.377	35.057	93.634	0.30053	0.291943	16.7271	16.7271	0	0	0	4	4	270	286.727	8.08511
	HT1080-2h-6.czi:c:1/3 - HT1080-2h-6.czi #1	70.529	63.263	72.403	56.839	0.291719	0.283842	16.2629	16.2629	0	0	0	4	4	270	286.263	6.69176	8	9	0.889
	HT1080-2h-6.czi:c:1/3 - HT1080-2h-6.czi #1	121.702	139.064	125.82	129.645	0.437201	0.41216	23.615	23.615	0	0	0	4	4	270	293.615	10.2799
	HT1080-2h-6.czi:c:1/3 - HT1080-2h-6.czi #1	156.605	150.989	160.383	144.098	0.548251	0.5015	28.7338	28.7338	0	0	0	4	4	270	298.734	7.8587
	HT1080-2h-8.czi:c:1/3 - HT1080-2h-8.czi #1	10.645	149.715	9.623	141.579	0.125615	0.12496	7.15968	7.15968	1	0	0	0	1	0	7.15968	8.19994
	HT1080-2h-8.czi:c:1/3 - HT1080-2h-8.czi #1	105.074	99.551	101.804	89.599	0.328577	0.317464	18.1893	18.1893	1	0	0	0	1	0	18.1893	10.4755
	HT1080-2h-8.czi:c:1/3 - HT1080-2h-8.czi #1	124.922	74.476	123.843	63.739	0.100494	0.100157	5.73859	5.73859	1	0	0	0	1	0	5.73859	10.7911
13	HT1080-2h-7.czi:c:1/3 - HT1080-2h-7.czi #1	124.348	89.386	124.143	87.976	0.14539	0.144378	8.27228	8.27228	1	0	0	0	1	0	8.27228	1.42482
14	HT1080-2h-7.czi:c:1/3 - HT1080-2h-7.czi #1	145.406	86.709	152.737	84.127	2.83927	1.23216	70.5976	70.5976	0	0	0	4	4	270	340.598	7.77241
15	HT1080-2h-7.czi:c:1/3 - HT1080-2h-7.czi #1	167.88	84.839	166.775	87.925	-0.358069	-0.343845	-19.7009	19.7009	0	0	2	0	2	90	109.701	3.27787
	HT1080-2h-8.czi:c:1/3 - HT1080-2h-8.czi #1	154.886	48.648	155.239	38.45	0.0346146	0.0346008	1.98248	1.98248	0	0	0	4	4	270	271.982	10.2041	10	11	0.909
	HT1080-2h-8.czi:c:1/3 - HT1080-2h-8.czi #1	34.797	131.331	43.434	130.239	7.90934	1.44503	82.7942	82.7942	0	0	0	4	4	270	352.794	8.70576
	HT1080-2h-9.czi:c:2/3 - HT1080-2h-9.czi #1	19.962	136.306	17.458	146.117	-0.255224	-0.249889	-14.3176	14.3176	0	0	2	0	2	90	104.318	10.1255
	HT1080-2h-9.czi:c:2/3 - HT1080-2h-9.czi #1	48	137.078	51.444	129.452	0.451613	0.424194	24.3045	24.3045	0	0	0	4	4	270	294.305	8.36762
	HT1080-2h-9.czi:c:2/3 - HT1080-2h-9.czi #1	68.319	136.689	69.738	128.167	0.16651	0.164996	9.4536	9.4536	0	0	0	4	4	270	279.454	8.63933
	HT1080-2h-9.czi:c:2/3 - HT1080-2h-9.czi #1	91.313	115.808	95.256	106.106	0.406411	0.386021	22.1174	22.1174	0	0	0	4	4	270	292.117	10.4726
	HT1080-2h-9.czi:c:2/3 - HT1080-2h-9.czi #1	114.691	88.794	120.09	77.407	0.474137	0.442744	25.3674	25.3674	0	0	0	4	4	270	295.367	12.6021
	HT1080-2h-10.czi:c:2/3 - HT1080-2h-10.czi #1	15.144	163.607	19.739	153.738	0.465599	0.43575	24.9667	24.9667	0	0	0	4	4	270	294.967	10.8863
	HT1080-2h-10.czi:c:2/3 - HT1080-2h-10.czi #1	75.95	125.458	68.826	122.823	2.70361	1.21653	69.7018	69.7018	1	0	0	0	1	0	69.7018	7.5957
	HT1080-2h-10.czi:c:2/3 - HT1080-2h-10.czi #1	122.544	93.354	116.673	89.786	1.64546	1.02471	58.7116	58.7116	1	0	0	0	1	0	58.7116	6.87017
	HT1080-2h-10.czi:c:2/3 - HT1080-2h-10.czi #1	139.555	63.447	132.021	59.098	1.73235	1.04727	60.0043	60.0043	1	0	0	0	1	0	60.0043	8.69914
13	HT1080-2h-7.czi:c:1/3 - HT1080-2h-7.czi #1
14	HT1080-2h-7.czi:c:1/3 - HT1080-2h-7.czi #1
15	HT1080-2h-7.czi:c:1/3 - HT1080-2h-7.czi #1

## Sheet: MARK2KO
	HT1080-2质心	Xg	Yg	Xn	Yn	Tanb	arcTanb	b-degrees	|b-degrees|	象限1	象限3	象限2	象限4	象限求和	加90度	360角度	Distance
	MARK2KO-2h-1.czi:c:1/3 - MARK2KO-2h-1.czi #1	18.89	79.635	17.491	87.846	-0.170381	-0.168761	-9.66927	9.66927	0	0	2	0	2	90	99.6693	8.32933	3	10	0.3
	MARK2KO-2h-1.czi:c:1/3 - MARK2KO-2h-1.czi #1	31.41	76.423	29.166	80.217	-0.59146	-0.534117	-30.6026	30.6026	0	0	2	0	2	90	120.603	4.40794
	MARK2KO-2h-1.czi:c:1/3 - MARK2KO-2h-1.czi #1	59.362	84.885	60.55	79.73	0.230456	0.226501	12.9776	12.9776	0	0	0	4	4	270	282.978	5.29012
	MARK2KO-2h-1.czi:c:2/3 - MARK2KO-2h-1.czi #1	138.42	90.85	141.612	92.092	-2.57005	-1.19972	-68.7391	68.7391	0	3	0	0	3	180	248.739	3.42512
	MARK2KO-2h-1.czi:c:2/3 - MARK2KO-2h-1.czi #1	165.073	102.373	170.135	104.84	-2.05188	-1.11731	-64.0174	64.0174	0	3	0	0	3	180	244.017	5.63116
	MARK2KO-2h-1.czi:c:2/3 - MARK2KO-2h-1.czi #1	192.008	104.04	188.557	106.658	-1.31818	-0.921801	-52.8153	52.8153	0	0	2	0	2	90	142.815	4.33167
	MARK2KO-2h-1.czi:c:2/3 - MARK2KO-2h-1.czi #1	214.547	99.95	205.539	100.808	-10.4988	-1.47583	-84.5591	84.5591	0	0	2	0	2	90	174.559	9.04877
	MARK2KO-2h-8.czi:c:2/3 - MARK2KO-2h-8.czi #1	53.13	91.224	60.79	85.231	1.27816	0.906895	51.9612	51.9612	0	0	0	4	4	270	321.961	9.72582
	MARK2KO-2h-8.czi:c:2/3 - MARK2KO-2h-8.czi #1	100.774	59.279	99.056	72.119	-0.133801	-0.133011	-7.62095	7.62095	0	0	2	0	2	90	97.6209	12.9544
	MARK2KO-2h-8.czi:c:2/3 - MARK2KO-2h-8.czi #1	175.476	84.013	176.075	75.628	0.0714371	0.0713159	4.0861	4.0861	0	0	0	4	4	270	274.086	8.40637
	MARK2KO-2h-7.czi:c:2/3 - MARK2KO-2h-7.czi #1	65.891	46.213	56.298	45.592	15.4477	1.50615	86.2961	86.2961	1	0	0	0	1	0	86.2961	9.61308
	MARK2KO-2h-7.czi:c:2/3 - MARK2KO-2h-7.czi #1	101.297	73.361	105.503	79.819	-0.651285	-0.577278	-33.0756	33.0756	0	3	0	0	3	180	213.076	7.70689
	MARK2KO-2h-7.czi:c:2/3 - MARK2KO-2h-7.czi #1	114.835	16.912	108.74	28.633	-0.520007	-0.479525	-27.4747	27.4747	0	0	2	0	2	90	117.475	13.211	6	12	0.5
	MARK2KO-2h-7.czi:c:2/3 - MARK2KO-2h-7.czi #1	129.765	37.121	120.064	44.201	-1.3702	-0.940335	-53.8772	53.8772	0	0	2	0	2	90	143.877	12.0098
	MARK2KO-2h-7.czi:c:2/3 - MARK2KO-2h-7.czi #1	149.944	53.261	143.042	64.972	-0.58936	-0.53256	-30.5134	30.5134	0	0	2	0	2	90	120.513	13.5936
	MARK2KO-2h-7.czi:c:2/3 - MARK2KO-2h-7.czi #1	153.34	96.774	160.376	90.288	1.0848	0.82605	47.3292	47.3292	0	0	0	4	4	270	317.329	9.5694
	MARK2KO-2h-7.czi:c:2/3 - MARK2KO-2h-7.czi #1	201.555	74.17	198.617	66.895	0.403849	0.38382	21.9913	21.9913	1	0	0	0	1	0	21.9913	7.84586
	MARK2KO-2h-2用.czi:c:2/3 - MARK2KO-2h-2用.czi #1	23.687	46.857	14.28	48.889	-4.62943	-1.35806	-77.8109	77.8109	0	0	2	0	2	90	167.811	9.62396
	MARK2KO-2h-2用.czi:c:2/3 - MARK2KO-2h-2用.czi #1	50.204	66.995	49.862	69.818	-0.121148	-0.12056	-6.90759	6.90759	0	0	2	0	2	90	96.9076	2.84364
	MARK2KO-2h-2用.czi:c:2/3 - MARK2KO-2h-2用.czi #1	141.563	90.877	149.553	85.444	1.47064	0.973637	55.7853	55.7853	0	0	0	4	4	270	325.785	9.66217
	MARK2KO-2h-2用.czi:c:2/3 - MARK2KO-2h-2用.czi #1	185.525	112.173	183.755	102.272	0.17877	0.176901	10.1357	10.1357	1	0	0	0	1	0	10.1357	10.058
	MARK2KO-2h-2用.czi:c:2/3 - MARK2KO-2h-2用.czi #1	208.178	94.976	212.163	82.012	0.30739	0.298222	17.0869	17.0869	0	0	0	4	4	270	287.087	13.5627
	MARK2KO-2h-4.czi:c:2/3 - MARK2KO-2h-4.czi #1	39.192	100.141	41.255	89.652	0.196682	0.194203	11.127	11.127	0	0	0	4	4	270	281.127	10.69	6	10	0.6
	MARK2KO-2h-4.czi:c:2/3 - MARK2KO-2h-4.czi #1	83.682	103.209	80.915	93.497	0.284905	0.277552	15.9025	15.9025	1	0	0	0	1	0	15.9025	10.0985
	MARK2KO-2h-4.czi:c:2/3 - MARK2KO-2h-4.czi #1	107.234	67.111	106.072	72.241	-0.226511	-0.222752	-12.7627	12.7627	0	0	2	0	2	90	102.763	5.25996
	MARK2KO-2h-4.czi:c:2/3 - MARK2KO-2h-4.czi #1	132.988	87.006	139.542	79.825	0.912686	0.73978	42.3863	42.3863	0	0	0	4	4	270	312.386	9.72223
	MARK2KO-2h-4.czi:c:2/3 - MARK2KO-2h-4.czi #1	182.575	79.376	193.825	73.496	1.91327	1.08918	62.4054	62.4054	0	0	0	4	4	270	332.405	12.694
	MARK2KO-2h-9.czi:c:2/3 - MARK2KO-2h-9.czi #1	48.144	103.212	36.023	103.531	-37.9969	-1.54448	-88.4924	88.4924	0	0	2	0	2	90	178.492	12.1252
	MARK2KO-2h-9.czi:c:2/3 - MARK2KO-2h-9.czi #1	94.085	60.205	95.507	80.104	-0.0714609	-0.0713396	-4.08746	4.08746	0	3	0	0	3	180	184.087	19.9497
	MARK2KO-2h-9.czi:c:2/3 - MARK2KO-2h-9.czi #1	135.107	69.09	135.56	59.49	0.0471875	0.0471525	2.70164	2.70164	0	0	0	4	4	270	272.702	9.61068
	MARK2KO-2h-9.czi:c:2/3 - MARK2KO-2h-9.czi #1	181.877	72.45	174.713	69.383	2.33583	1.16629	66.8236	66.8236	1	0	0	0	1	0	66.8236	7.79291
	MARK2KO-2h-9.czi:c:2/3 - MARK2KO-2h-9.czi #1	214.311	51.442	204.965	51.985	-17.2118	-1.51276	-86.6749	86.6749	0	0	2	0	2	90	176.675	9.36176

## Sheet: M2KO-WT
	HT1080-2质心	Xg	Yg	Xn	Yn	Tanb	arcTanb	b-degrees	|b-degrees|	象限1	象限3	象限2	象限4	象限求和	加90度	360角度	Distance
	MARK2KO-CAMSAP2-WT-2h-1.czi:c:1/4 - MARK2KO-CAMSAP2-WT-2h-1.czi #1	52.406	77.487	55.097	78.132	-4.17209	-1.33555	-76.5212	76.5212	0	3	0	0	3	180	256.521	2.76722	7	8	0.778
	MARK2KO-CAMSAP2-WT-2h-1.czi:c:1/4 - MARK2KO-CAMSAP2-WT-2h-1.czi #1	111.072	73.454	109.203	71.738	1.08916	0.82805	47.4438	47.4438	1	0	0	0	1	0	47.4438	2.53729
	MARK2KO-CAMSAP2-WT-2h-1.czi:c:1/4 - MARK2KO-CAMSAP2-WT-2h-1.czi #1	162.812	70.046	156.19	62.686	0.899728	0.732665	41.9786	41.9786	1	0	0	0	1	0	41.9786	9.90053
	MARK2KO-CAMSAP2-WT-2h-2.czi:c:1/4 - MARK2KO-CAMSAP2-WT-2h-2.czi #1	29.491	70.581	22.427	63.51	0.99901	0.784903	44.9716	44.9716	1	0	0	0	1	0	44.9716	9.99496
	MARK2KO-CAMSAP2-WT-2h-2.czi:c:1/4 - MARK2KO-CAMSAP2-WT-2h-2.czi #1	83.828	67.403	93.508	67.356	205.957	1.56594	89.7218	89.7218	0	0	0	4	4	270	359.722	9.68011
	MARK2KO-CAMSAP2-WT-2h-2.czi:c:1/4 - MARK2KO-CAMSAP2-WT-2h-2.czi #1	103.964	86.864	114.629	85.57	8.24189	1.45006	83.082	83.082	0	0	0	4	4	270	353.082	10.7432
	MARK2KO-CAMSAP2-WT-2h-2.czi:c:1/4 - MARK2KO-CAMSAP2-WT-2h-2.czi #1	124.539	109.97	116.18	103.007	1.20049	0.876258	50.2059	50.2059	1	0	0	0	1	0	50.2059	10.8792
	MARK2KO-CAMSAP2-WT-2h-3.czi:c:1/4 - MARK2KO-CAMSAP2-WT-2h-3.czi #1	74.117	92.505	69.247	85.977	0.746017	0.640947	36.7236	36.7236	1	0	0	0	1	0	36.7236	8.14443
	MARK2-KO-CS2-WT-1.czi:c:1/4 - MARK2-KO-CS2-WT-1.czi #1	68.832	75.977	75.032	82.934	-0.891189	-0.727926	-41.7071	41.7071	0	3	0	0	3	180	221.707	9.31879	10	12	0.833
	MARK2-KO-CS2-WT-1.czi:c:1/4 - MARK2-KO-CS2-WT-1.czi #1	94.101	79.741	101.947	74.345	1.45404	0.968347	55.4822	55.4822	0	0	0	4	4	270	325.482	9.52242
	MARK2-KO-CS2-WT-1.czi:c:1/4 - MARK2-KO-CS2-WT-1.czi #1	136.6	85.811	135.076	74.02	0.129251	0.128539	7.36471	7.36471	1	0	0	0	1	0	7.36471	11.8891
	MARK2-KO-CS2-WT-1.czi:c:1/4 - MARK2-KO-CS2-WT-1.czi #1	150.152	75.676	158.629	78.084	-3.52035	-1.29402	-74.1421	74.1421	0	3	0	0	3	180	254.142	8.81238
	MARK2-KO-CS2-WT-1.czi:c:1/4 - MARK2-KO-CS2-WT-1.czi #1	172.12	80.547	173.38	79.311	1.01942	0.795013	45.5509	45.5509	0	0	0	4	4	270	315.551	1.76502
	MARK2-KO-CS2-WT-1.czi:c:1/4 - MARK2-KO-CS2-WT-1.czi #1	211.793	86.635	200.887	82.546	2.66716	1.21209	69.4474	69.4474	1	0	0	0	1	0	69.4474	11.6473
	MARK2KO-CAMSAP2-WT-2h-5.czi:c:1/4 - MARK2KO-CAMSAP2-WT-2h-5.czi #1	53.519	57.148	62.217	53.498	2.38301	1.17348	67.2353	67.2353	0	0	0	4	4	270	337.235	9.4328
	MARK2KO-CAMSAP2-WT-2h-5.czi:c:1/4 - MARK2KO-CAMSAP2-WT-2h-5.czi #1	70.149	66.632	76.22	64.179	2.47493	1.1868	67.9987	67.9987	0	0	0	4	4	270	337.999	6.54784
	MARK2KO-CAMSAP2-WT-2h-5.czi:c:1/4 - MARK2KO-CAMSAP2-WT-2h-5.czi #1	102.758	70.317	101.878	61.262	0.0971839	0.0968796	5.55079	5.55079	1	0	0	0	1	0	5.55079	9.09766
	MARK2KO-CAMSAP2-WT-2h-5.czi:c:1/4 - MARK2KO-CAMSAP2-WT-2h-5.czi #1	136.208	84.524	143.428	82.029	2.89379	1.23808	70.9365	70.9365	0	0	0	4	4	270	340.936	7.63894
	MARK2KO-CAMSAP2-WT-2h-5.czi:c:1/4 - MARK2KO-CAMSAP2-WT-2h-5.czi #1	169.561	86.139	172.332	82.807	0.831633	0.693734	39.748	39.748	0	0	0	4	4	270	309.748	4.33367
	MARK2KO-CAMSAP2-WT-2h-5.czi:c:1/4 - MARK2KO-CAMSAP2-WT-2h-5.czi #1	202.559	99.8	200.894	88.723	0.150311	0.149195	8.54822	8.54822	1	0	0	0	1	0	8.54822	11.2014
	MARK2-KO-CS2-WT-8.czi:c:1/4 - MARK2-KO-CS2-WT-8.czi #1	54.035	58.589	44.024	60.266	-5.96959	-1.40482	-80.4904	80.4904	0	0	2	0	2	90	170.49	10.1505	5	8	0.625
	MARK2-KO-CS2-WT-8.czi:c:1/4 - MARK2-KO-CS2-WT-8.czi #1	72.033	78.79	81.083	72.666	1.47779	0.97589	55.9144	55.9144	0	0	0	4	4	270	325.914	10.9273
	MARK2-KO-CS2-WT-8.czi:c:1/4 - MARK2-KO-CS2-WT-8.czi #1	108.804	61.432	116.42	61.108	23.5062	1.52828	87.564	87.564	0	0	0	4	4	270	357.564	7.62289
	MARK2-KO-CS2-WT-8.czi:c:1/4 - MARK2-KO-CS2-WT-8.czi #1	152.752	59.763	150.792	59.294	4.1791	1.33593	76.543	76.543	1	0	0	0	1	0	76.543	2.01533
	MARK2-KO-CS2-WT-8.czi:c:1/4 - MARK2-KO-CS2-WT-8.czi #1	181.14	68.754	171.674	72.742	-2.37362	-1.17207	-67.1544	67.1544	0	0	2	0	2	90	157.154	10.2718
	MARK2-KO-CS2-WT-8.czi:c:1/4 - MARK2-KO-CS2-WT-8.czi #1	200.865	83.032	190.328	83.359	-32.2232	-1.53977	-88.2225	88.2225	0	0	2	0	2	90	178.222	10.5421
	MARK2KO-CAMSAP2-WT-2h-3.czi:c:1/4 - MARK2KO-CAMSAP2-WT-2h-3.czi #1	108.49	91.886	106.7	85.736	0.291057	0.283232	16.228	16.228	1	0	0	0	1	0	16.228	6.4052
	MARK2KO-CAMSAP2-WT-2h-3.czi:c:1/4 - MARK2KO-CAMSAP2-WT-2h-3.czi #1	202.335	110.499	202.407	100.792	0.00741733	0.00741719	0.424974	0.424974	0	0	0	4	4	270	270.425	9.70727

## Sheet: M2KO-2A
	HT1080-2质心	Xg	Yg	Xn	Yn	Tanb	arcTanb	b-degrees	|b-degrees|	象限1	象限3	象限2	象限4	象限求和	加90度	360角度	Distance
	MARK2KO-CAMSAP2-A-2h-1.czi:c:1/4 - MARK2KO-CAMSAP2-A-2h-1.czi #1	86.123	108.645	74.535	107.889	15.328	1.50565	86.2673	86.2673	1	0	0	0	1	0	86.2673	11.6126	1	7	9	0.778
	MARK2KO-CAMSAP2-A-2h-1.czi:c:1/4 - MARK2KO-CAMSAP2-A-2h-1.czi #1	135.291	106.435	132.048	104.018	1.34175	0.930312	53.3029	53.3029	1	0	0	0	1	0	53.3029	4.04462	1
	MARK2KO-CAMSAP2-A-2h-3.czi:c:1/4 - MARK2KO-CAMSAP2-A-2h-3.czi #1	52.907	79.82	51.565	79.378	3.0362	1.25263	71.7702	71.7702	1	0	0	0	1	0	71.7702	1.41291	1
	MARK2KO-CAMSAP2-A-2h-3.czi:c:1/4 - MARK2KO-CAMSAP2-A-2h-3.czi #1	90.052	83.329	89.71	84.011	-0.501466	-0.46482	-26.6322	26.6322	0	0	2	0	2	90	116.632	0.762947	1
	MARK2KO-CAMSAP2-A-2h-3.czi:c:1/4 - MARK2KO-CAMSAP2-A-2h-3.czi #1	139.156	98.225	131.361	90.462	1.00412	0.787455	45.1178	45.1178	1	0	0	0	1	0	45.1178	11.0012	1
	MARK2KO-CAMSAP2-A-2h-6.czi:c:1/4 - MARK2KO-CAMSAP2-A-2h-6.czi #1	72.951	81.107	77.621	76.901	1.11032	0.837626	47.9925	47.9925	0	0	0	4	4	270	317.992	6.28485	1
	MARK2KO-CAMSAP2-A-2h-6.czi:c:1/4 - MARK2KO-CAMSAP2-A-2h-6.czi #1	127.341	70.658	124.17	68.539	1.49646	0.981703	56.2474	56.2474	1	0	0	0	1	0	56.2474	3.81384	1
	MARK2KO-CAMSAP2-A-2h-6.czi:c:1/4 - MARK2KO-CAMSAP2-A-2h-6.czi #1	162.256	85.503	158.313	87.172	-2.36249	-1.17038	-67.0579	67.0579	0	0	2	0	2	90	157.058	4.28168	1
	MARK2KO-CAMSAP2-A-2h-6.czi:c:1/4 - MARK2KO-CAMSAP2-A-2h-6.czi #1	196.772	78.891	203.86	77.418	4.81195	1.3659	78.2601	78.2601	0	0	0	4	4	270	348.26	7.23944	1
	MARK2-KO-CS2-A-4.czi:c:1/4 - MARK2-KO-CS2-A-4.czi #1	20.718	71.504	35.963	64.096	2.05791	1.11847	64.0835	64.0835	0	0	0	4	4	270	334.084	16.9496	1
	MARK2-KO-CS2-A-4.czi:c:1/4 - MARK2-KO-CS2-A-4.czi #1	59.882	66.76	46.165	73.018	-2.19191	-1.14278	-65.4765	65.4765	0	0	2	0	2	90	155.476	15.0771	1
	MARK2-KO-CS2-A-4.czi:c:1/4 - MARK2-KO-CS2-A-4.czi #1	75.979	76.82	89.322	71.144	2.35078	1.16859	66.9555	66.9555	0	0	0	4	4	270	336.956	14.5001	1
	MARK2-KO-CS2-A-4.czi:c:1/4 - MARK2-KO-CS2-A-4.czi #1	160.704	82.504	154.056	75.532	0.953528	0.761614	43.6373	43.6373	1	0	0	0	1	0	43.6373	9.63352	1
	MARK2KO-CAMSAP2-A-2h-7.czi:c:1/4 - MARK2KO-CAMSAP2-A-2h-7.czi #1	95.546	85.268	98.032	84.586	3.64516	1.30305	74.6591	74.6591	0	0	0	4	4	270	344.659	2.57785	1	10	18	0.556
	MARK2KO-CAMSAP2-A-2h-7.czi:c:1/4 - MARK2KO-CAMSAP2-A-2h-7.czi #1	160.606	76.084	161.563	75.174	1.05165	0.810567	46.4421	46.4421	0	0	0	4	4	270	316.442	1.32059	1
	MARK2KO-CAMSAP2-A-2h-7.czi:c:1/4 - MARK2KO-CAMSAP2-A-2h-7.czi #1	220.146	67.093	212.935	69.594	-2.88325	-1.23695	-70.8719	70.8719	0	0	2	0	2	90	160.872	7.6324	1
	MARK2KO-CAMSAP2-A-2h-9.czi:c:1/4 - MARK2KO-CAMSAP2-A-2h-9.czi #1	25.879	66.703	25.895	66.363	0.0470588	0.0470241	2.69428	2.69428	0	0	0	4	4	270	272.694	0.340376	1
	MARK2KO-CAMSAP2-A-2h-9.czi:c:1/4 - MARK2KO-CAMSAP2-A-2h-9.czi #1	42.327	75.004	56.259	76.523	-9.17182	-1.4622	-83.7776	83.7776	0	3	0	0	3	180	263.778	14.0146	1
	MARK2KO-CAMSAP2-A-2h-9.czi:c:1/4 - MARK2KO-CAMSAP2-A-2h-9.czi #1	88.173	64.161	79.378	69.417	-1.67333	-1.03213	-59.1369	59.1369	0	0	2	0	2	90	149.137	10.2459	1
	MARK2KO-CAMSAP2-A-2h-9.czi:c:1/4 - MARK2KO-CAMSAP2-A-2h-9.czi #1	132.267	61.157	135.969	56.256	0.755356	0.64692	37.0658	37.0658	0	0	0	4	4	270	307.066	6.14204	1
	MARK2-KO-CS2-A-5.czi:c:1/4 - MARK2-KO-CS2-A-5.czi #1	35.574	90.238	36.556	90.716	-2.05439	-1.1178	-64.045	64.045	0	3	0	0	3	180	244.045	1.09216	1
	MARK2-KO-CS2-A-5.czi:c:1/4 - MARK2-KO-CS2-A-5.czi #1	122.333	91.724	119.303	92.982	-2.40859	-1.17727	-67.4527	67.4527	0	0	2	0	2	90	157.453	3.28077	1
	MARK2-KO-CS2-A-5.czi:c:1/4 - MARK2-KO-CS2-A-5.czi #1	178.324	78.949	185.059	78.231	9.38022	1.46459	83.9148	83.9148	0	0	0	4	4	270	353.915	6.77316	1
	MARK2-KO-CS2-A-6.czi:c:1/4 - MARK2-KO-CS2-A-6.czi #1	43.314	79.67	46.002	79.693	-116.87	-1.56224	-89.5098	89.5098	0	3	0	0	3	180	269.51	2.6881	1
	MARK2-KO-CS2-A-6.czi:c:1/4 - MARK2-KO-CS2-A-6.czi #1	116.967	74.297	117.12	74.466	-0.905325	-0.73575	-42.1553	42.1553	0	3	0	0	3	180	222.155	0.227969	1
	MARK2-KO-CS2-A-6.czi:c:1/4 - MARK2-KO-CS2-A-6.czi #1	122.705	48.193	123.088	46.803	0.27554	0.268868	15.405	15.405	0	0	0	4	4	270	285.405	1.4418	1
	MARK2-KO-CS2-A-6.czi:c:1/4 - MARK2-KO-CS2-A-6.czi #1	162.973	53.116	162.063	49.442	0.247686	0.2428	13.9114	13.9114	1	0	0	0	1	0	13.9114	3.78502	1
	MARK2-KO-CS2-A-9.czi:c:1/4 - MARK2-KO-CS2-A-9.czi #1	63.251	71.995	66.842	71.578	8.61151	1.45519	83.3763	83.3763	0	0	0	4	4	270	353.376	3.61513	1	8	13	0.615
	MARK2-KO-CS2-A-9.czi:c:1/4 - MARK2-KO-CS2-A-9.czi #1	91.607	65.596	81.67	63.785	5.48702	1.39053	79.6713	79.6713	1	0	0	0	1	0	79.6713	10.1007	1
	MARK2-KO-CS2-A-9.czi:c:1/4 - MARK2-KO-CS2-A-9.czi #1	115.747	71.674	106.039	63.181	1.14306	0.852054	48.8191	48.8191	1	0	0	0	1	0	48.8191	12.8987	1
	MARK2-KO-CS2-A-2.czi:c:3/4 - MARK2-KO-CS2-A-2.czi #1xinyong	188.821	79.883	189.588	78.591	0.593653	0.53574	30.6956	30.6956	0	0	0	4	4	270	300.696	1.50252	1
	MARK2-KO-CS2-A-2.czi:c:3/4 - MARK2-KO-CS2-A-2.czi #1	155.723	47.429	165.596	62.439	-0.657761	-0.581812	-33.3354	33.3354	0	3	0	0	3	180	213.335	17.966	1
	MARK2-KO-CS2-A-2.czi:c:3/4 - MARK2-KO-CS2-A-2.czi #1	143.837	70.372	142.207	85.468	-0.107976	-0.107559	-6.16267	6.16267	0	0	2	0	2	90	96.1627	15.1837	1
	MARK2-KO-CS2-A-2.czi:c:3/4 - MARK2-KO-CS2-A-2.czi #1	111.705	94.666	108.674	85.936	0.347194	0.334172	19.1467	19.1467	1	0	0	0	1	0	19.1467	9.2412	1
	MARK2-KO-CS2-A-2.czi:c:3/4 - MARK2-KO-CS2-A-2.czi #1	73.518	107.078	69.278	98.209	0.47807	0.44595	25.551	25.551	1	0	0	0	1	0	25.551	9.8304	1
	MARK2-KO-CS2-A-2.czi:c:3/4 - MARK2-KO-CS2-A-2.czi #1	31.937	115.587	38.687	114.155	4.71369	1.36175	78.0224	78.0224	0	0	0	4	4	270	348.022	6.90023	1
	MARK2-KO-CS2-A-3.czi:c:1/4 - MARK2-KO-CS2-A-3.czi #1xinyong	169.002	53.235	172.727	57.263	-0.924777	-0.746336	-42.7619	42.7619	0	3	0	0	3	180	222.762	5.48638	1
	MARK2-KO-CS2-A-3.czi:c:1/4 - MARK2-KO-CS2-A-3.czi #1	113.807	76.971	127.809	69.753	1.93987	1.09483	62.729	62.729	0	0	0	4	4	270	332.729	15.753	1
	MARK2-KO-CS2-A-3.czi:c:1/4 - MARK2-KO-CS2-A-3.czi #1	80.178	71.143	95.721	74.398	-4.77512	-1.36436	-78.1721	78.1721	0	3	0	0	3	180	258.172	15.8802	1
	MARK2-KO-CS2-A-3.czi:c:1/4 - MARK2-KO-CS2-A-3.czi #1	60.101	73.694	48.481	75.312	-7.18171	-1.43244	-82.073	82.073	0	0	2	0	2	90	172.073	11.7321	1
		17	MARK2-KO-CS2-A-4.czi:c:1/4 - MARK2-KO-CS2-A-4.czi #1
		18	MARK2-KO-CS2-A-4.czi:c:1/4 - MARK2-KO-CS2-A-4.czi #1
		19	MARK2-KO-CS2-A-4.czi:c:1/4 - MARK2-KO-CS2-A-4.czi #1
		20	MARK2-KO-CS2-A-4.czi:c:1/4 - MARK2-KO-CS2-A-4.czi #1

## Sheet: M2KO-2D
	HT1080-2质心	Xg	Yg	Xn	Yn	Tanb	arcTanb	b-degrees	|b-degrees|	象限1	象限3	象限2	象限4	象限求和	加90度	360角度	Distance
	MARK2KO-CAMSAP2-D-2h-1.czi:c:1/4 - MARK2KO-CAMSAP2-D-2h-1.czi #1	58.486	49.838	70.189	56.456	-1.76836	-1.05613	-60.512	60.512	0	3	0	0	3	180	240.512	13.4446	9	10	90
	MARK2KO-CAMSAP2-D-2h-1.czi:c:1/4 - MARK2KO-CAMSAP2-D-2h-1.czi #1	92.256	62.401	91.178	58.033	0.246795	0.24196	13.8633	13.8633	1	0	0	0	1	0	13.8633	4.49906
	MARK2KO-CAMSAP2-D-2h-1.czi:c:1/4 - MARK2KO-CAMSAP2-D-2h-1.czi #1	130.768	74.381	116.008	64.668	1.51961	0.988774	56.6526	56.6526	1	0	0	0	1	0	56.6526	17.6692
	MARK2KO-CAMSAP2-D-2h-1.czi:c:1/4 - MARK2KO-CAMSAP2-D-2h-1.czi #1	140.352	65.671	134.624	62.33	1.71446	1.04277	59.7461	59.7461	1	0	0	0	1	0	59.7461	6.63116
	MARK2KO-CAMSAP2-D-2h-1.czi:c:1/4 - MARK2KO-CAMSAP2-D-2h-1.czi #1	172.975	95.163	162.625	92.435	3.79399	1.31308	75.2341	75.2341	1	0	0	0	1	0	75.2341	10.7035
	MARK2KO-CAMSAP2-D-2h-1.czi:c:1/4 - MARK2KO-CAMSAP2-D-2h-1.czi #1	184.784	66.23	173.678	52.841	0.829487	0.692464	39.6753	39.6753	1	0	0	0	1	0	39.6753	17.3956
	MARK2KO-CAMSAP2-D-2h-2.czi:c:1/4 - MARK2KO-CAMSAP2-D-2h-2.czi #1	30.172	94.912	28.975	86.222	0.137745	0.136883	7.84283	7.84283	1	0	0	0	1	0	7.84283	8.77205
	MARK2KO-CAMSAP2-D-2h-2.czi:c:1/4 - MARK2KO-CAMSAP2-D-2h-2.czi #1	68.573	105.96	62.516	99.702	0.967881	0.769078	44.0649	44.0649	1	0	0	0	1	0	44.0649	8.70918
	MARK2KO-CAMSAP2-D-2h-2.czi:c:1/4 - MARK2KO-CAMSAP2-D-2h-2.czi #1	98.165	99.98	99.065	94.862	0.17585	0.17407	9.97349	9.97349	0	0	0	4	4	270	279.973	5.19653
	MARK2KO-CAMSAP2-D-2h-2.czi:c:1/4 - MARK2KO-CAMSAP2-D-2h-2.czi #1	109.851	97.145	117.876	91.222	1.35489	0.934975	53.5701	53.5701	0	0	0	4	4	270	323.57	9.97409
	MARK2KO-CAMSAP2-D-2h-8.czi:c:1/4 - MARK2KO-CAMSAP2-D-2h-8.czi #1	48.215	109.157	58.32	108.397	13.2961	1.49573	85.6989	85.6989	0	0	0	4	4	270	355.699	10.1335
	MARK2KO-CAMSAP2-D-2h-8.czi:c:1/4 - MARK2KO-CAMSAP2-D-2h-8.czi #1	88.425	104.254	85.661	113.074	-0.313379	-0.303685	-17.3999	17.3999	0	0	2	0	2	90	107.4	9.24295
	MARK2KO-CAMSAP2-D-2h-8.czi:c:1/4 - MARK2KO-CAMSAP2-D-2h-8.czi #1	117.892	72.919	110.588	73.764	-8.64379	-1.45562	-83.4008	83.4008	0	0	2	0	2	90	173.401	7.35272
	MARK2KO-CAMSAP2-D-2h-8.czi:c:1/4 - MARK2KO-CAMSAP2-D-2h-8.czi #1	146.309	76.3	152.424	70.247	1.01024	0.790493	45.2919	45.2919	0	0	0	4	4	270	315.292	8.60419
	MARK2KO-CAMSAP2-D-2h-8.czi:c:1/4 - MARK2KO-CAMSAP2-D-2h-8.czi #1	169.234	90.292	165.464	82.946	0.513204	0.474155	27.1671	27.1671	1	0	0	0	1	0	27.1671	8.25691
	MARK2KO-CAMSAP2-D-2h-5.czi:c:1/4 - MARK2KO-CAMSAP2-D-2h-5.czi #1	57.437	97.835	51.077	92.208	1.13026	0.846472	48.4993	48.4993	1	0	0	0	1	0	48.4993	8.49192	14	17	82.3
	MARK2KO-CAMSAP2-D-2h-5.czi:c:1/4 - MARK2KO-CAMSAP2-D-2h-5.czi #1	76.309	81.124	71.293	71.85	0.540867	0.495804	28.4075	28.4075	1	0	0	0	1	0	28.4075	10.5436
	MARK2KO-CAMSAP2-D-2h-5.czi:c:1/4 - MARK2KO-CAMSAP2-D-2h-5.czi #1	106.29	66.96	104.245	58.441	0.240052	0.235594	13.4985	13.4985	1	0	0	0	1	0	13.4985	8.76102
	MARK2KO-CAMSAP2-D-2h-5.czi:c:1/4 - MARK2KO-CAMSAP2-D-2h-5.czi #1	127.806	48.263	129.361	52.908	-0.334769	-0.323042	-18.5089	18.5089	0	3	0	0	3	180	198.509	4.89837
	MARK2KO-CAMSAP2-D-2h-5.czi:c:1/4 - MARK2KO-CAMSAP2-D-2h-5.czi #1	151.726	50.889	148.368	48.384	1.34052	0.929873	53.2778	53.2778	1	0	0	0	1	0	53.2778	4.18941
	MARK2KO-CAMSAP2-D-2h-6.czi:c:1/4 - MARK2KO-CAMSAP2-D-2h-6.czi #1	97.061	110.709	96.715	101.134	0.0361358	0.0361201	2.06953	2.06953	1	0	0	0	1	0	2.06953	9.58125
	MARK2KO-CAMSAP2-D-2h-6.czi:c:1/4 - MARK2KO-CAMSAP2-D-2h-6.czi #1	139.634	109.557	134.344	104.791	1.10995	0.837459	47.9829	47.9829	1	0	0	0	1	0	47.9829	7.12031
	MARK2KO-CAMSAP2-D-2h-6.czi:c:1/4 - MARK2KO-CAMSAP2-D-2h-6.czi #1	159.646	79.065	162.429	72.981	0.457429	0.429015	24.5807	24.5807	0	0	0	4	4	270	294.581	6.6903
	MARK2KO-CAMSAP2-D-2h-7.czi:c:1/4 - MARK2KO-CAMSAP2-D-2h-7.czi #1	71.345	91.066	73.263	77.218	0.138504	0.137628	7.88551	7.88551	0	0	0	4	4	270	277.886	13.9802
	MARK2KO-CAMSAP2-D-2h-7.czi:c:1/4 - MARK2KO-CAMSAP2-D-2h-7.czi #1	94.485	100.077	95.686	89.042	0.108836	0.108409	6.21137	6.21137	0	0	0	4	4	270	276.211	11.1002
	MARK2KO-CAMSAP2-D-2h-7.czi:c:1/4 - MARK2KO-CAMSAP2-D-2h-7.czi #1	113.77	100.719	117.769	89.675	0.362097	0.347411	19.9052	19.9052	0	0	0	4	4	270	289.905	11.7457
	MARK2KO-CAMSAP2-D-2h-7.czi:c:1/4 - MARK2KO-CAMSAP2-D-2h-7.czi #1	127.626	106.876	131.92	99.386	0.573298	0.520554	29.8255	29.8255	0	0	0	4	4	270	299.826	8.63357
	MARK2KO-CAMSAP2-D-2h-9.czi:c:1/4 - MARK2KO-CAMSAP2-D-2h-9.czi #1	27.346	94.347	32.407	86.052	0.610127	0.547832	31.3885	31.3885	0	0	0	4	4	270	301.388	9.71703	10	12	83.3
	MARK2KO-CAMSAP2-D-2h-9.czi:c:1/4 - MARK2KO-CAMSAP2-D-2h-9.czi #1	82.756	80.813	74.376	79.999	10.2948	1.47396	84.4519	84.4519	1	0	0	0	1	0	84.4519	8.41944
	MARK2KO-CAMSAP2-D-2h-9.czi:c:1/4 - MARK2KO-CAMSAP2-D-2h-9.czi #1	85.367	88.864	99.952	81.666	2.02626	1.11235	63.7327	63.7327	0	0	0	4	4	270	333.733	16.2645
	MARK2KO-CAMSAP2-D-2h-9.czi:c:1/4 - MARK2KO-CAMSAP2-D-2h-9.czi #1	106.925	99.704	109.835	94.245	0.533065	0.489748	28.0605	28.0605	0	0	0	4	4	270	298.061	6.18618
	MARK2KO-CAMSAP2-D-2h-9.czi:c:1/4 - MARK2KO-CAMSAP2-D-2h-9.czi #1	130.258	108.942	139.356	106.031	3.12539	1.26113	72.2574	72.2574	0	0	0	4	4	270	342.257	9.55236
	MARK2KO-CAMSAP2-D-2h-3.czi:c:1/4 - MARK2KO-CAMSAP2-D-2h-3.czi #1	13.359	129.13	23.7	130.897	-5.85229	-1.40156	-80.3033	80.3033	0	3	0	0	3	180	260.303	10.4909
	MARK2KO-CAMSAP2-D-2h-3.czi:c:1/4 - MARK2KO-CAMSAP2-D-2h-3.czi #1	42.309	110.225	38.159	111.63	-2.95374	-1.24435	-71.2963	71.2963	0	0	2	0	2	90	161.296	4.38138
	MARK2KO-CAMSAP2-D-2h-3.czi:c:1/4 - MARK2KO-CAMSAP2-D-2h-3.czi #1	63.462	123.117	64.777	106.294	0.0781668	0.0780082	4.46954	4.46954	0	0	0	4	4	270	274.47	16.8743
	MARK2KO-CAMSAP2-D-2h-3.czi:c:1/4 - MARK2KO-CAMSAP2-D-2h-3.czi #1	94.131	118.604	95.673	108.407	0.151221	0.150084	8.59917	8.59917	0	0	0	4	4	270	278.599	10.3129
	MARK2KO-CAMSAP2-D-2h-3.czi:c:1/4 - MARK2KO-CAMSAP2-D-2h-3.czi #1	113.732	136.064	111.48	129.22	0.329047	0.317888	18.2137	18.2137	1	0	0	0	1	0	18.2137	7.20499
	MARK2KO-CAMSAP2-D-2h-3.czi:c:1/4 - MARK2KO-CAMSAP2-D-2h-3.czi #1	133.361	103.747	140.113	93.266	0.644213	0.572297	32.7902	32.7902	0	0	0	4	4	270	302.79	12.4676
	MARK2KO-CAMSAP2-D-2h-3.czi:c:1/4 - MARK2KO-CAMSAP2-D-2h-3.czi #1	157.549	88.048	160.905	79.044	0.372723	0.356773	20.4416	20.4416	0	0	0	4	4	270	290.442	9.6091
7	MARK2KO-CAMSAP2-D-2h-8.czi:c:1/4 - MARK2KO-CAMSAP2-D-2h-8.czi #1
8	MARK2KO-CAMSAP2-D-2h-8.czi:c:1/4 - MARK2KO-CAMSAP2-D-2h-8.czi #1
9	MARK2KO-CAMSAP2-D-2h-8.czi:c:1/4 - MARK2KO-CAMSAP2-D-2h-8.czi #1
10	MARK2KO-CAMSAP2-D-2h-8.czi:c:1/4 - MARK2KO-CAMSAP2-D-2h-8.czi #1
11	MARK2KO-CAMSAP2-D-2h-8.czi:c:1/4 - MARK2KO-CAMSAP2-D-2h-8.czi #1
12	MARK2KO-CAMSAP2-D-2h-8.czi:c:1/4 - MARK2KO-CAMSAP2-D-2h-8.czi #1
