# Supplementary material for: MARK2 regulates Golgi apparatus reorientation by phosphorylation of CAMSAP2 in directional cell migratio
Source: eLife journal article supplement (doi:10.7554/elife.105977), 2025-03-26
Supplement: fig5-data3 [file Figure5C source data 1.xlsx]

## Sheet: Sheet1
HT1080	MARK2 KO	GFP-CAMSAP2	GFP-CAMSAP2-S835A	GFP-CAMSAP2-S835D
85.7	30	77.8	77.8	90
88.9	50	83.3	55.6	82.3
90.9	60	62.5	61.5	83.3
