# Supplementary material for: MARK2 regulates Golgi apparatus reorientation by phosphorylation of CAMSAP2 in directional cell migratio
Source: eLife journal article supplement (doi:10.7554/elife.105977), 2025-03-26
Supplement: fig5-data3 [file Figure5E source data 1.xlsx]

## Sheet: Sheet1
CAMSAP2	CAMSAP2A	CAMSAP2D
1	1.128	1.112
1	0.527362	0.4
1	0.842	2.274
