# Supplementary material for: MARK2 regulates Golgi apparatus reorientation by phosphorylation of CAMSAP2 in directional cell migratio
Source: eLife journal article supplement (doi:10.7554/elife.105977), 2025-03-26
Supplement: fig5-data3 [file Figure5G source data 1.xlsx]

## Sheet: Sheet1
CAMSAP2	CAMSAP2A	CAMSAP2D
1	0.828515	2.14446
1	0.991299	1.40196
1	2.09934	1.70125
