# Supplementary material for: MARK2 regulates Golgi apparatus reorientation by phosphorylation of CAMSAP2 in directional cell migratio
Source: eLife journal article supplement (doi:10.7554/elife.105977), 2025-03-26

Western blot analysis showing Flag-USO1 protein levels. The blot is divided into two main sections: Input and IP. Each section contains four lanes labeled -, WT, A, and D. The Input section shows strong bands for all lanes, while the IP section shows bands only for the WT, A, and D lanes, indicating successful immunoprecipitation. A molecular weight marker of -100KD is indicated on the right.

|           | Input  |        |        |        | IP   |        |        |        |
|-----------|--------|--------|--------|--------|------|--------|--------|--------|
|           | -      | WT     | A      | D      | -    | WT     | A      | D      |
| Flag-USO1 | Strong | Strong | Strong | Strong | Weak | Strong | Strong | Strong |

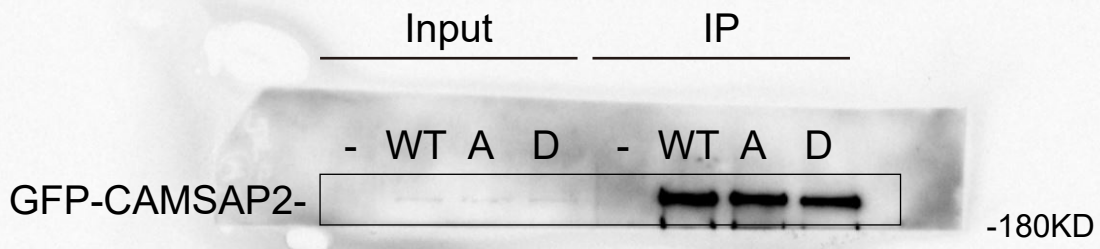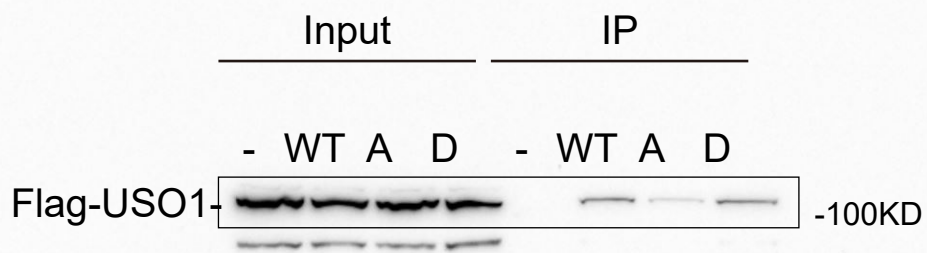

Supplement: fig6-data1 [file elife-105977-fig6-data1-v1.zip]
