# Supplementary material for: MARK2 regulates Golgi apparatus reorientation by phosphorylation of CAMSAP2 in directional cell migratio
Source: eLife journal article supplement (doi:10.7554/elife.105977), 2025-03-26
Supplement: fig6-data3 [file elife-105977-fig6-data3-v1.zip]

## Sheet: Sheet1
HT1080	USO1 SiRNA
0.937	0.905
0.918	0.854
0.893	0.906
0.893	0.874
0.923	0.884
0.941	0.926
0.917	0.912
0.922	0.906
0.89	0.882
0.893	0.911
0.939	0.913
0.897	0.924
0.897	0.922
0.893	0.922
0.911	0.885
0.88	0.85
0.929	0.916
0.926	0.914
0.899	0.887
0.921	0.864
0.941	0.895
0.937	0.922
0.894	0.921
0.925	0.9
0.951	0.861
0.949	0.919
0.889	0.894
0.931	0.911
0.89	0.874
0.909	0.906
0.951	0.846
0.934	0.905
0.904	0.881
0.938	0.918
0.929	0.904
0.917	0.94
0.889	0.916
0.907	0.914
0.902	0.909
0.892	0.872
0.899	0.927
0.918	0.892
0.886	0.899
0.884	0.916
0.923	0.932
0.931	0.897
0.92	0.9
0.899	0.86
0.906	0.905
0.886	0.906
0.908	0.924
0.907	0.918
0.897	0.938
0.9	0.925
0.895	0.921
0.907	0.915
0.879	0.924
0.914	0.865
0.916	0.897
0.87	0.924
0.879	0.897
0.902	0.88
0.91	0.908
0.893	0.916
0.889
0.903
0.923
0.93
0.917
0.913
0.905
0.915
0.885
0.879
0.912
0.909
0.936
