# Supplementary material for: MARK2 regulates Golgi apparatus reorientation by phosphorylation of CAMSAP2 in directional cell migratio
Source: eLife journal article supplement (doi:10.7554/elife.105977), 2025-03-26
Supplement: fig6-data3 [file Figure6D source data 1.xlsx]

## Sheet: Sheet1
CAMSAP2	CAMSAP2A	CAMSAP2D
1	0.228454	1.10053
1	0.786541	1.9796
1	0.708003	1.55978
