# Supplementary material for: MARK2 regulates Golgi apparatus reorientation by phosphorylation of CAMSAP2 in directional cell migratio
Source: eLife journal article supplement (doi:10.7554/elife.105977), 2025-03-26
Supplement: fig6-data4 [file elife-105977-fig6-data4-v1.zip]

## Sheet: Sheet1
Protein IDs	Majority protein IDs	Peptide counts (all)	Peptide counts (razor+unique)	Peptide counts (unique)	Protein names	Gene names	Fasta headers	Number of proteins	Peptides	Razor + unique peptides	Unique peptides	Peptides 1	Peptides 2	Peptides 3	Peptides 4	Peptides 5	Peptides 6	Razor + unique peptides 1	Razor + unique peptides 2	Razor + unique peptides 3	Razor + unique peptides 4	Razor + unique peptides 5	Razor + unique peptides 6	Unique peptides1 TurboID	Unique peptides 2	Unique peptides 3	Unique peptides 4 TurboID-CAMSAP2-835A	Unique peptides 5 TurboID-CAMSAP2-835D	Unique peptides 6	Sequence coverage [%]	Unique + razor sequence coverage [%]	Unique sequence coverage [%]	Mol. weight [kDa]	Sequence length	Sequence lengths	Q-value	Score	Identification type 1	Identification type 2	Identification type 3	Identification type 4	Identification type 5	Identification type 6	Sequence coverage 1 [%]	Sequence coverage 2 [%]	Sequence coverage 3 [%]	Sequence coverage 4 [%]	Sequence coverage 5 [%]	Sequence coverage 6 [%]
A0FGR8-2;A0FGR8-4;A0FGR8;A0FGR8-6;A0FGR8-5	A0FGR8-2;A0FGR8-4;A0FGR8;A0FGR8-6	3;2;2;2;1	3;2;2;2;1	3;2;2;2;1	Extended synaptotagmin-2	ESYT2	Isoform 2 of Extended synaptotagmin-2 OS=Homo sapiens GN=ESYT2;Isoform 4 of Extended synaptotagmin-2 OS=Homo sapiens GN=ESYT2;Extended synaptotagmin-2 OS=Homo sapiens GN=ESYT2 PE=1 SV=1;Isoform 6 of Extended synaptotagmin-2 OS=Homo sapiens GN=ESYT2	5	3	3	3	0	0	0	3	3	0	0	0	0	3	3	0	0	0	0	3	3	0	4	4	4	98.9	893	893;527;921;942;328	0	5.6781				By MS/MS	By MS/MS		0	0	0	4	4	0
A2RRP1-2;A2RRP1	A2RRP1-2;A2RRP1	3;3	3;3	3;3	Neuroblastoma-amplified sequence	NBAS	Isoform 2 of Neuroblastoma-amplified sequence OS=Homo sapiens GN=NBAS;Neuroblastoma-amplified sequence OS=Homo sapiens GN=NBAS PE=1 SV=2	2	3	3	3	0	0	0	2	3	0	0	0	0	2	3	0	0	0	0	2	3	0	1.6	1.6	1.6	254.81	2251	2251;2371	0	10.669				By MS/MS	By MS/MS		0	0	0	1.2	1.6	0
A3KN83-4;A3KN83-3;A3KN83-2;A3KN83;Q9Y2G9-3;Q9Y2G9	A3KN83-4;A3KN83-3;A3KN83-2;A3KN83;Q9Y2G9-3;Q9Y2G9	2;2;2;2;1;1	2;2;2;2;1;1	2;2;2;2;1;1	Protein strawberry notch homolog 1;Protein strawberry notch homolog 2	SBNO1;SBNO2	Isoform 4 of Protein strawberry notch homolog 1 OS=Homo sapiens GN=SBNO1;Isoform 3 of Protein strawberry notch homolog 1 OS=Homo sapiens GN=SBNO1;Isoform 2 of Protein strawberry notch homolog 1 OS=Homo sapiens GN=SBNO1;Protein strawberry notch homolog 1 OS	6	2	2	2	1	1	0	2	2	1	1	1	0	2	2	1	1	1	0	2	2	1	3.4	3.4	3.4	80.851	732	732;1391;1392;1393;1309;1366	0	6.3244	By matching	By MS/MS		By MS/MS	By MS/MS	By MS/MS	1.8	1.8	0	3.4	3.4	1.8
A4GXA9-2	A4GXA9-2	1	1	1			Isoform 2 of Probable crossover junction endonuclease EME2 OS=Homo sapiens GN=EME2	1	1	1	1	1	1	1	0	1	1	1	1	1	0	1	1	1	1	1	0	1	1	5.3	5.3	5.3	26.446	245	245	0.0027304	1.7861	By MS/MS	By MS/MS	By MS/MS		By MS/MS	By MS/MS	5.3	5.3	5.3	0	5.3	5.3
A4UGR9-2;A4UGR9-3;A4UGR9;A4UGR9-8	A4UGR9-2;A4UGR9-3;A4UGR9;A4UGR9-8	1;1;1;1	1;1;1;1	1;1;1;1	Xin actin-binding repeat-containing protein 2	XIRP2	Isoform 2 of Xin actin-binding repeat-containing protein 2 OS=Homo sapiens GN=XIRP2;Isoform 3 of Xin actin-binding repeat-containing protein 2 OS=Homo sapiens GN=XIRP2;Xin actin-binding repeat-containing protein 2 OS=Homo sapiens GN=XIRP2 PE=1 SV=2;Isoform	4	1	1	1	0	0	0	1	1	0	0	0	0	1	1	0	0	0	0	1	1	0	0.4	0.4	0.4	377.34	3327	3327;3345;3374;3549	1	-2				By MS/MS	By MS/MS		0	0	0	0.4	0.4	0
A5YKK6-4;A5YKK6;A5YKK6-3;A5YKK6-2	A5YKK6-4;A5YKK6;A5YKK6-3;A5YKK6-2	4;4;3;3	4;4;3;3	4;4;3;3	CCR4-NOT transcription complex subunit 1	CNOT1	Isoform 4 of CCR4-NOT transcription complex subunit 1 OS=Homo sapiens GN=CNOT1;CCR4-NOT transcription complex subunit 1 OS=Homo sapiens GN=CNOT1 PE=1 SV=2;Isoform 3 of CCR4-NOT transcription complex subunit 1 OS=Homo sapiens GN=CNOT1;Isoform 2 of CCR4-NOT	4	4	4	4	0	0	0	4	3	0	0	0	0	4	3	0	0	0	0	4	3	0	3	3	3	173.79	1551	1551;2376;2150;2371	0	28.881				By MS/MS	By MS/MS		0	0	0	3	2.4	0
A6NHR9;A6NHR9-2;A6NHR9-3	A6NHR9;A6NHR9-2;A6NHR9-3	4;4;2	4;4;2	4;4;2	Structural maintenance of chromosomes flexible hinge domain-containing protein 1	SMCHD1	Structural maintenance of chromosomes flexible hinge domain-containing protein 1 OS=Homo sapiens GN=SMCHD1 PE=1 SV=2;Isoform 2 of Structural maintenance of chromosomes flexible hinge domain-containing protein 1 OS=Homo sapiens GN=SMCHD1;Isoform 3 of Struct	3	4	4	4	0	0	0	3	3	0	0	0	0	3	3	0	0	0	0	3	3	0	3.3	3.3	3.3	226.37	2005	2005;1917;762	0	87.69				By MS/MS	By MS/MS		0	0	0	2.6	2.6	0
Q7Z3J3;A6NKT7	Q7Z3J3;A6NKT7	5;5	1;1	1;1	RanBP2-like and GRIP domain-containing protein 4;RanBP2-like and GRIP domain-containing protein 3	RGPD4;RGPD3	RanBP2-like and GRIP domain-containing protein 4 OS=Homo sapiens GN=RGPD4 PE=2 SV=3;RanBP2-like and GRIP domain-containing protein 3 OS=Homo sapiens GN=RGPD3 PE=3 SV=2	2	5	1	1	1	0	1	4	5	1	1	0	0	1	1	0	1	0	0	1	1	0	3.9	0.7	0.7	197.29	1758	1758;1758	0	3.5057	By MS/MS		By matching	By MS/MS	By MS/MS	By matching	0.7	0	0.6	3.3	3.9	0.6
A6NMY6;P07355;P07355-2	A6NMY6;P07355;P07355-2	5;5;4	5;5;4	5;5;4	Putative annexin A2-like protein;Annexin A2	ANXA2P2;ANXA2	Putative annexin A2-like protein OS=Homo sapiens GN=ANXA2P2 PE=5 SV=2;Annexin A2 OS=Homo sapiens GN=ANXA2 PE=1 SV=2;Isoform 2 of Annexin A2 OS=Homo sapiens GN=ANXA2	3	5	5	5	3	2	2	4	4	2	3	2	2	4	4	2	3	2	2	4	4	2	16.2	16.2	16.2	38.659	339	339;339;357	0	17.61	By MS/MS	By MS/MS	By MS/MS	By MS/MS	By MS/MS	By MS/MS	8.8	6.2	6.2	10.9	13	5.9
A8CG34;Q96HA1;Q96HA1-2;A8CG34-2;Q96HA1-3	A8CG34;Q96HA1;Q96HA1-2;A8CG34-2;Q96HA1-3	2;2;1;1;1	2;2;1;1;1	2;2;1;1;1	Nuclear envelope pore membrane protein POM 121C;Nuclear envelope pore membrane protein POM 121	POM121C;POM121	Nuclear envelope pore membrane protein POM 121C OS=Homo sapiens GN=POM121C PE=1 SV=2;Nuclear envelope pore membrane protein POM 121 OS=Homo sapiens GN=POM121 PE=1 SV=2;Isoform 2 of Nuclear envelope pore membrane protein POM 121 OS=Homo sapiens GN=POM121;Is	5	2	2	2	0	0	0	2	1	0	0	0	0	2	1	0	0	0	0	2	1	0	2.9	2.9	2.9	125.06	1229	1229;1249;984;987;999	0	4.4632				By MS/MS	By MS/MS		0	0	0	2.9	1	0
B2RTY4-5;B2RTY4-2;B2RTY4;B2RTY4-4	B2RTY4-5;B2RTY4-2;B2RTY4;B2RTY4-4	1;1;1;1	1;1;1;1	1;1;1;1	Unconventional myosin-IXa	MYO9A	Isoform 5 of Unconventional myosin-IXa OS=Homo sapiens GN=MYO9A;Isoform 2 of Unconventional myosin-IXa OS=Homo sapiens GN=MYO9A;Unconventional myosin-IXa OS=Homo sapiens GN=MYO9A PE=1 SV=2;Isoform 4 of Unconventional myosin-IXa OS=Homo sapiens GN=MYO9A	4	1	1	1	1	1	1	1	0	1	1	1	1	1	0	1	1	1	1	1	0	1	0.6	0.6	0.6	265.41	2312	2312;2529;2548;2619	0.0089744	1.4148	By matching	By MS/MS	By MS/MS	By matching		By MS/MS	0.6	0.6	0.6	0.6	0	0.6
O43790;CON__O43790;CON__Q01546;CON__P78386;CON__O95678;CON__Q61726;CON__Q5XKE5;CON__P78385;CON__Q6NT21;CON__Q14533;CON__Q8VED5;CON__P07744;CON__Q8N1N4-2;CON__Q7RTT2;O95678;Q5XKE5;Q8N1N4-2;Q8N1N4;P14136-3;Q14533;P78385;P14136-2;P14136;P78386	O43790;CON__O43790;CON__Q01546;CON__P78386;CON__O95678;CON__Q61726;CON__Q5XKE5;CON__P78385;CON__Q6NT21;CON__Q14533;CON__Q8VED5;CON__P07744;CON__Q8N1N4-2;CON__Q7RTT2;O95678;Q5XKE5;Q8N1N4-2;Q8N1N4;P14136-3;Q14533;P78385;P14136-2;P14136;P78386	2;2;1;1;1;1;1;1;1;1;1;1;1;1;1;1;1;1;1;1;1;1;1;1	1;1;0;0;0;0;0;0;0;0;0;0;0;0;0;0;0;0;0;0;0;0;0;0	1;1;0;0;0;0;0;0;0;0;0;0;0;0;0;0;0;0;0;0;0;0;0;0	Keratin, type II cuticular Hb6;Keratin, type II cytoskeletal 75;Keratin, type II cytoskeletal 79;Keratin, type II cytoskeletal 78;Glial fibrillary acidic protein;Keratin, type II cuticular Hb1;Keratin, type II cuticular Hb3;Keratin, type II cuticular Hb5	KRT86;KRT75;KRT79;KRT78;GFAP;KRT81;KRT83;KRT85	Keratin, type II cuticular Hb6 OS=Homo sapiens GN=KRT86 PE=1 SV=1;;;;;;;;;;;;;;Keratin, type II cytoskeletal 75 OS=Homo sapiens GN=KRT75 PE=1 SV=2;Keratin, type II cytoskeletal 79 OS=Homo sapiens GN=KRT79 PE=1 SV=2;Isoform 2 of Keratin, type II cytoskeleta	24	2	1	1	2	2	1	1	1	1	1	1	0	0	0	0	1	1	0	0	0	0	6.2	4.7	4.7	53.5	486	486;486;638;507;551;479;535;493;493;505;531;525;521;521;551;535;410;520;431;505;493;438;432;507	0	35.752	By MS/MS	By MS/MS	By matching	By matching	By matching	By matching	6.2	6.2	1.4	1.4	1.4	1.4
P02533;CON__P02533;CON__Q61782	P02533;CON__P02533	4;4;1	3;3;0	1;1;0	Keratin, type I cytoskeletal 14	KRT14	Keratin, type I cytoskeletal 14 OS=Homo sapiens GN=KRT14 PE=1 SV=4;	3	4	3	1	0	0	0	2	4	0	0	0	0	2	3	0	0	0	0	1	1	0	11.2	8.9	3.2	51.561	472	472;472;93	0	5.5629				By MS/MS	By MS/MS		0	0	0	5.7	11.2	0
CON__P02538;P02538;CON__P48668;P48668;CON__P50446;CON__Q8BGZ7;CON__P12035;P12035;Q01546	CON__P02538;P02538;CON__P48668;P48668	9;9;8;8;4;2;2;2;2	7;7;6;6;2;0;1;1;1	2;2;1;1;0;0;0;0;0	Keratin, type II cytoskeletal 6A;Keratin, type II cytoskeletal 6C	KRT6A;KRT6C	;Keratin, type II cytoskeletal 6A OS=Homo sapiens GN=KRT6A PE=1 SV=3;;Keratin, type II cytoskeletal 6C OS=Homo sapiens GN=KRT6C PE=1 SV=3	9	9	7	2	2	2	5	6	9	1	1	1	3	4	7	0	0	0	2	1	2	0	17.9	15.1	4.8	60.044	564	564;564;564;564;553;551;629;628;638	0	14.324	By matching	By matching	By MS/MS	By MS/MS	By MS/MS	By matching	4.3	2.8	9.2	11.2	17.9	1.2
CON__P02769;CON__P02768-1;P02768-3;P02768-2;P02768	CON__P02769	5;1;1;1;1	5;1;1;1;1	5;1;1;1;1				5	5	5	5	1	4	2	3	3	3	1	4	2	3	3	3	1	4	2	3	3	3	9.2	9.2	9.2	69.293	607	607;609;396;417;609	0	13.336	By MS/MS	By MS/MS	By MS/MS	By MS/MS	By MS/MS	By MS/MS	2	7.6	3.6	5.6	5.6	5.1
CON__P04259;P04259	CON__P04259;P04259	8;7	1;1	1;1	Keratin, type II cytoskeletal 6B	KRT6B	;Keratin, type II cytoskeletal 6B OS=Homo sapiens GN=KRT6B PE=1 SV=5	2	8	1	1	3	2	4	5	7	1	1	0	1	0	0	0	1	0	1	0	0	0	16.1	3	3	59.998	564	564;564	0.0059172	1.5959	By matching	By matching	By MS/MS	By matching	By matching	By matching	7.3	2.8	7.4	9.4	13.1	1.2
CON__P05787;P05787;P05787-2;CON__H-INV:HIT000292931;CON__Q9H552;CON__REFSEQ:XP_092267;CON__Q9DCV7;CON__Q3KNV1;CON__P08729;P08729;CON__Q9NSB2;CON__Q6ISB0;Q9NSB2	CON__P05787;P05787;P05787-2	15;15;15;6;6;3;3;3;3;3;2;2;2	12;12;12;5;4;3;0;0;0;0;0;0;0	11;11;11;4;4;3;0;0;0;0;0;0;0	Keratin, type II cytoskeletal 8	KRT8	;Keratin, type II cytoskeletal 8 OS=Homo sapiens GN=KRT8 PE=1 SV=7;Isoform 2 of Keratin, type II cytoskeletal 8 OS=Homo sapiens GN=KRT8	13	15	12	11	1	4	4	14	14	5	0	2	2	12	11	3	0	2	1	11	10	3	25.5	22.2	20.3	53.704	483	483;483;511;443;499;213;457;469;469;469;600;600;600	0	45.629	By matching	By matching	By matching	By MS/MS	By MS/MS	By matching	1.4	7.5	7.2	25.5	23.4	9.1
CON__P06868;P00747	CON__P06868	4;1	4;1	4;1				2	4	4	4	2	3	3	2	3	4	2	3	3	2	3	4	2	3	3	2	3	4	5.4	5.4	5.4	91.215	812	812;810	0	7.2205	By MS/MS	By MS/MS	By MS/MS	By matching	By MS/MS	By MS/MS	2	3.3	3.3	3.4	4.4	5.4
CON__P07477;P07477	CON__P07477;P07477	1;1	1;1	1;1	Trypsin-1;Alpha-trypsin chain 1;Alpha-trypsin chain 2	PRSS1	;Trypsin-1 OS=Homo sapiens GN=PRSS1 PE=1 SV=1	2	1	1	1	1	1	0	0	0	1	1	1	0	0	0	1	1	1	0	0	0	1	4	4	4	26.558	247	247;247	0	2.5063	By MS/MS	By matching				By MS/MS	4	4	0	0	0	4
CON__P08779;P08779;CON__ENSEMBL:ENSP00000377550;CON__Q6IFX2;CON__P19012;CON__P13646-1;P13646-2;P13646-3;P19012;P13646	CON__P08779;P08779	3;3;1;1;1;1;1;1;1;1	1;1;0;0;0;0;0;0;0;0	1;1;0;0;0;0;0;0;0;0	Keratin, type I cytoskeletal 16	KRT16	;Keratin, type I cytoskeletal 16 OS=Homo sapiens GN=KRT16 PE=1 SV=4	10	3	1	1	0	0	0	2	3	0	0	0	0	1	1	0	0	0	0	1	1	0	8.7	3	3	51.267	473	473;473;420;452;456;458;355;420;456;458	0	4.362				By MS/MS	By MS/MS		0	0	0	5.5	8.7	0
CON__P12763;P02765	CON__P12763;P02765	3;2	3;2	3;2	Alpha-2-HS-glycoprotein;Alpha-2-HS-glycoprotein chain A;Alpha-2-HS-glycoprotein chain B	AHSG	;Alpha-2-HS-glycoprotein OS=Homo sapiens GN=AHSG PE=1 SV=1	2	3	3	3	1	1	1	2	2	1	1	1	1	2	2	1	1	1	1	2	2	1	7.8	7.8	7.8	38.418	359	359;367	0	14.629	By MS/MS	By MS/MS	By MS/MS	By MS/MS	By MS/MS	By MS/MS	4.2	4.2	4.2	3.6	3.6	4.2
CON__P13645;P13645;CON__P02535-1;CON__Q7Z3Z0;CON__Q7Z3Y8;CON__Q148H6;CON__Q7Z3Y7;Q7Z3Z0;Q7Z3Y8;Q7Z3Y7	CON__P13645;P13645	9;9;2;1;1;1;1;1;1;1	9;9;2;1;1;1;1;1;1;1	9;9;2;1;1;1;1;1;1;1	Keratin, type I cytoskeletal 10	KRT10	;Keratin, type I cytoskeletal 10 OS=Homo sapiens GN=KRT10 PE=1 SV=6	10	9	9	9	4	4	3	9	9	4	4	4	3	9	9	4	4	4	3	9	9	4	16.9	16.9	16.9	59.51	593	593;584;570;450;459;464;486;450;459;464	0	40.346	By matching	By matching	By MS/MS	By MS/MS	By MS/MS	By MS/MS	9.3	9.3	8.1	16.9	16.9	8.9
CON__P13647;P13647;CON__Q5XQN5;CON__Q922U2	CON__P13647;P13647;CON__Q5XQN5;CON__Q922U2	6;6;4;3	4;4;3;2	4;4;3;2	Keratin, type II cytoskeletal 5	KRT5	;Keratin, type II cytoskeletal 5 OS=Homo sapiens GN=KRT5 PE=1 SV=3;;	4	6	4	4	2	1	3	2	6	1	1	0	2	1	4	0	1	0	2	1	4	0	11.4	8.6	8.6	62.378	590	590;590;601;580	0	6.9884	By matching	By matching	By MS/MS	By MS/MS	By MS/MS	By matching	4.1	1.2	6.4	2.9	11.4	1.2
CON__P20930;P20930	CON__P20930;P20930	5;5	5;5	5;5	Filaggrin	FLG	;Filaggrin OS=Homo sapiens GN=FLG PE=1 SV=3	2	5	5	5	0	4	5	4	4	4	0	4	5	4	4	4	0	4	5	4	4	4	3.7	3.7	3.7	435.16	4061	4061;4061	0	23.594		By MS/MS	By MS/MS	By MS/MS	By MS/MS	By MS/MS	0	3.2	3.7	3.5	1.9	3.2
CON__P35527;P35527	CON__P35527;P35527	5;5	5;5	5;5	Keratin, type I cytoskeletal 9	KRT9	;Keratin, type I cytoskeletal 9 OS=Homo sapiens GN=KRT9 PE=1 SV=3	2	5	5	5	2	2	2	3	5	3	2	2	2	3	5	3	2	2	2	3	5	3	16.5	16.5	16.5	62.129	623	623;623	0	55.456	By MS/MS	By MS/MS	By MS/MS	By MS/MS	By MS/MS	By MS/MS	4.7	6.3	6.3	8.3	16.5	8.3
CON__P35908v2;CON__P35908;P35908;CON__Q9R0H5;CON__Q6NXH9;CON__Q6IFZ6;CON__Q7Z794;CON__P19013;P19013;Q7Z794	CON__P35908v2;CON__P35908;P35908	8;8;8;1;1;1;1;1;1;1	6;6;6;0;0;0;0;0;0;0	5;5;5;0;0;0;0;0;0;0	Keratin, type II cytoskeletal 2 epidermal	KRT2	;;Keratin, type II cytoskeletal 2 epidermal OS=Homo sapiens GN=KRT2 PE=1 SV=2	10	8	6	5	2	5	4	7	7	4	2	3	3	5	5	3	1	2	2	4	5	3	18.5	15.2	13	65.432	639	639;645;639;524;539;572;578;594;534;578	0	31.42	By MS/MS	By MS/MS	By MS/MS	By MS/MS	By MS/MS	By MS/MS	5.8	12.2	10.3	17.1	16.3	10.3
CON__P67983;Q8N339;P80297;P13640-2;P04732;P02795;P13640	CON__P67983;Q8N339;P80297;P13640-2;P04732;P02795;P13640	1;1;1;1;1;1;1	1;1;1;1;1;1;1	1;1;1;1;1;1;1	Metallothionein-1M;Metallothionein-1X;Metallothionein-1G;Metallothionein-1E;Metallothionein-2	MT1M;MT1X;MT1G;MT1E;MT2A	;Metallothionein-1M OS=Homo sapiens GN=MT1M PE=3 SV=2;Metallothionein-1X OS=Homo sapiens GN=MT1X PE=1 SV=1;Isoform 2 of Metallothionein-1G OS=Homo sapiens GN=MT1G;Metallothionein-1E OS=Homo sapiens GN=MT1E PE=1 SV=1;Metallothionein-2 OS=Homo sapiens GN=MT2	7	1	1	1	1	1	1	1	1	1	1	1	1	1	1	1	1	1	1	1	1	1	19.7	19.7	19.7	5.9511	61	61;61;61;61;61;61;62	0	3.6847	By matching	By MS/MS	By MS/MS	By MS/MS	By MS/MS	By MS/MS	19.7	19.7	19.7	19.7	19.7	19.7
CON__Q04695;Q04695;CON__Q9QWL7	CON__Q04695;Q04695;CON__Q9QWL7	4;4;2	4;4;2	3;3;1	Keratin, type I cytoskeletal 17	KRT17	;Keratin, type I cytoskeletal 17 OS=Homo sapiens GN=KRT17 PE=1 SV=2;	3	4	4	3	1	1	0	1	4	0	1	1	0	1	4	0	1	1	0	1	3	0	10.2	10.2	7.6	48.105	432	432;432;433	0	65.89	By MS/MS	By matching		By matching	By MS/MS		1.9	1.9	0	1.9	10.2	0
CON__Q14CN4-1;CON__Q6IME9;CON__Q3SY84;CON__Q7RTS7;CON__Q32MB2;Q86Y46-2;Q14CN4-3;Q14CN4-2;Q14CN4;Q3SY84;Q7RTS7;Q86Y46	CON__Q14CN4-1;CON__Q6IME9;CON__Q3SY84;CON__Q7RTS7;CON__Q32MB2;Q86Y46-2;Q14CN4-3;Q14CN4-2;Q14CN4;Q3SY84;Q7RTS7;Q86Y46	1;1;1;1;1;1;1;1;1;1;1;1	1;1;1;1;1;1;1;1;1;1;1;1	1;1;1;1;1;1;1;1;1;1;1;1	Keratin, type II cytoskeletal 73;Keratin, type II cytoskeletal 72;Keratin, type II cytoskeletal 71;Keratin, type II cytoskeletal 74	KRT73;KRT72;KRT71;KRT74	;;;;;Isoform 2 of Keratin, type II cytoskeletal 73 OS=Homo sapiens GN=KRT73;Isoform 3 of Keratin, type II cytoskeletal 72 OS=Homo sapiens GN=KRT72;Isoform 2 of Keratin, type II cytoskeletal 72 OS=Homo sapiens GN=KRT72;Keratin, type II cytoskeletal 72 OS=Ho	12	1	1	1	0	0	0	1	0	0	0	0	0	1	0	0	0	0	0	1	0	0	2.3	2.3	2.3	55.877	511	511;520;523;529;540;381;469;510;511;523;529;540	0	3.8968				By MS/MS			0	0	0	2.3	0	0
CON__Q28085	CON__Q28085	1	1	1				1	1	1	1	1	0	0	0	0	0	1	0	0	0	0	0	1	0	0	0	0	0	0.7	0.7	0.7	140.37	1236	1236	0.0046481	1.6589	By MS/MS						0.7	0	0	0	0	0
CON__Q28194;P07996-2;P07996	CON__Q28194;P07996-2;P07996	2;2;2	2;2;2	2;2;2	Thrombospondin-1	THBS1	;Isoform 2 of Thrombospondin-1 OS=Homo sapiens GN=THBS1;Thrombospondin-1 OS=Homo sapiens GN=THBS1 PE=1 SV=2	3	2	2	2	0	0	0	2	0	1	0	0	0	2	0	1	0	0	0	2	0	1	2.1	2.1	2.1	129.39	1170	1170;1085;1170	0	3.0878				By MS/MS		By MS/MS	0	0	0	2.1	0	1
CON__Q86YZ3;Q86YZ3	CON__Q86YZ3;Q86YZ3	1;1	1;1	1;1	Hornerin	HRNR	;Hornerin OS=Homo sapiens GN=HRNR PE=1 SV=2	2	1	1	1	0	0	1	1	1	0	0	0	1	1	1	0	0	0	1	1	1	0	1.5	1.5	1.5	282.39	2850	2850;2850	0	7.3415			By matching	By MS/MS	By MS/MS		0	0	1.5	1.5	1.5	0
CON__Streptavidin	CON__Streptavidin	2	2	2				1	2	2	2	2	2	2	2	2	2	2	2	2	2	2	2	2	2	2	2	2	2	18.8	18.8	18.8	16.622	160	160	0	52.537	By MS/MS	By MS/MS	By MS/MS	By MS/MS	By MS/MS	By MS/MS	18.8	18.8	18.8	18.8	18.8	18.8
Q13765;E9PAV3-2;E9PAV3	Q13765;E9PAV3-2;E9PAV3	2;2;2	2;2;2	2;2;2	Nascent polypeptide-associated complex subunit alpha;Nascent polypeptide-associated complex subunit alpha, muscle-specific form	NACA	Nascent polypeptide-associated complex subunit alpha OS=Homo sapiens GN=NACA PE=1 SV=1;Isoform 2 of Nascent polypeptide-associated complex subunit alpha, muscle-specific form OS=Homo sapiens GN=NACA;Nascent polypeptide-associated complex subunit alpha, mus	3	2	2	2	1	1	1	1	1	2	1	1	1	1	1	2	1	1	1	1	1	2	13.5	13.5	13.5	23.384	215	215;925;2078	0	20.294	By MS/MS	By MS/MS	By matching	By MS/MS	By MS/MS	By MS/MS	7	7	7	7	7	13.5
E9PRG8	E9PRG8	1	1	1	Uncharacterized protein C11orf98	C11orf98	Uncharacterized protein C11orf98 OS=Homo sapiens GN=C11orf98 PE=4 SV=1	1	1	1	1	0	0	0	0	0	1	0	0	0	0	0	1	0	0	0	0	0	1	10.7	10.7	10.7	13.798	122	122	0.0013928	1.8821						By MS/MS	0	0	0	0	0	10.7
O00116	O00116	1	1	1	Alkyldihydroxyacetonephosphate synthase, peroxisomal	AGPS	Alkyldihydroxyacetonephosphate synthase, peroxisomal OS=Homo sapiens GN=AGPS PE=1 SV=1	1	1	1	1	0	0	0	1	1	0	0	0	0	1	1	0	0	0	0	1	1	0	3.5	3.5	3.5	72.911	658	658	0	13.111				By MS/MS	By MS/MS		0	0	0	3.5	3.5	0
O00154-2;O00154-3;O00154-4	O00154-2;O00154-3;O00154-4	1;1;1	1;1;1	1;1;1			Isoform 2 of Cytosolic acyl coenzyme A thioester hydrolase OS=Homo sapiens GN=ACOT7;Isoform 3 of Cytosolic acyl coenzyme A thioester hydrolase OS=Homo sapiens GN=ACOT7;Isoform 4 of Cytosolic acyl coenzyme A thioester hydrolase OS=Homo sapiens GN=ACOT7	3	1	1	1	0	0	0	1	1	1	0	0	0	1	1	1	0	0	0	1	1	1	6.1	6.1	6.1	27.041	246	246;283;338	0	3.0696				By MS/MS	By MS/MS	By matching	0	0	0	6.1	6.1	6.1
O00159;O00159-3;O00159-2	O00159;O00159-3;O00159-2	5;5;4	5;5;4	5;5;4	Unconventional myosin-Ic	MYO1C	Unconventional myosin-Ic OS=Homo sapiens GN=MYO1C PE=1 SV=4;Isoform 3 of Unconventional myosin-Ic OS=Homo sapiens GN=MYO1C;Isoform 2 of Unconventional myosin-Ic OS=Homo sapiens GN=MYO1C	3	5	5	5	1	1	2	4	5	2	1	1	2	4	5	2	1	1	2	4	5	2	4.5	4.5	4.5	121.68	1063	1063;1044;1028	0	6.7947	By matching	By MS/MS	By MS/MS	By MS/MS	By MS/MS	By MS/MS	0.8	0.8	1.8	3.6	4.5	1.8
O00203-3;O00203;Q13367-3;Q13367;Q13367-4	O00203-3;O00203;Q13367-3;Q13367;Q13367-4	2;2;1;1;1	2;2;1;1;1	2;2;1;1;1	AP-3 complex subunit beta-1;AP-3 complex subunit beta-2	AP3B1;AP3B2	Isoform 2 of AP-3 complex subunit beta-1 OS=Homo sapiens GN=AP3B1;AP-3 complex subunit beta-1 OS=Homo sapiens GN=AP3B1 PE=1 SV=3;Isoform 3 of AP-3 complex subunit beta-2 OS=Homo sapiens GN=AP3B2;AP-3 complex subunit beta-2 OS=Homo sapiens GN=AP3B2 PE=1 SV=	5	2	2	2	0	0	0	2	1	0	0	0	0	2	1	0	0	0	0	2	1	0	1.7	1.7	1.7	116.19	1045	1045;1094;1050;1082;1101	0.0014025	1.9501				By MS/MS	By MS/MS		0	0	0	1.7	0.8	0
O00213-4;O00213-6;O00213-3;O00213-5;O00213-2;O00213	O00213-4;O00213-6;O00213-3;O00213-5;O00213-2;O00213	1;1;1;1;1;1	1;1;1;1;1;1	1;1;1;1;1;1	Amyloid beta A4 precursor protein-binding family B member 1	APBB1	Isoform 4 of Amyloid-beta A4 precursor protein-binding family B member 1 OS=Homo sapiens GN=APBB1;Isoform 6 of Amyloid-beta A4 precursor protein-binding family B member 1 OS=Homo sapiens GN=APBB1;Isoform 3 of Amyloid-beta A4 precursor protein-binding famil	6	1	1	1	0	0	0	1	1	0	0	0	0	1	1	0	0	0	0	1	1	0	4	4	4	49.856	451	451;475;488;490;708;710	0	2.9148				By MS/MS	By MS/MS		0	0	0	4	4	0
O00231;O00231-2	O00231;O00231-2	1;1	1;1	1;1	26S proteasome non-ATPase regulatory subunit 11	PSMD11	26S proteasome non-ATPase regulatory subunit 11 OS=Homo sapiens GN=PSMD11 PE=1 SV=3;Isoform 2 of 26S proteasome non-ATPase regulatory subunit 11 OS=Homo sapiens GN=PSMD11	2	1	1	1	0	0	0	1	1	0	0	0	0	1	1	0	0	0	0	1	1	0	2.4	2.4	2.4	47.463	422	422;423	0	2.4866				By MS/MS	By MS/MS		0	0	0	2.4	2.4	0
O00255-3;O00255-2;O00255	O00255-3;O00255-2;O00255	1;1;1	1;1;1	1;1;1	Menin	MEN1	Isoform 3 of Menin OS=Homo sapiens GN=MEN1;Isoform 2 of Menin OS=Homo sapiens GN=MEN1;Menin OS=Homo sapiens GN=MEN1 PE=1 SV=4	3	1	1	1	0	0	0	1	1	1	0	0	0	1	1	1	0	0	0	1	1	1	2.4	2.4	2.4	63.747	575	575;610;615	0.0040541	1.7154				By MS/MS	By MS/MS	By matching	0	0	0	2.4	2.4	2.4
O00257-3;O00257	O00257-3;O00257	1;1	1;1	1;1	E3 SUMO-protein ligase CBX4	CBX4	Isoform 2 of E3 SUMO-protein ligase CBX4 OS=Homo sapiens GN=CBX4;E3 SUMO-protein ligase CBX4 OS=Homo sapiens GN=CBX4 PE=1 SV=3	2	1	1	1	0	0	0	1	1	0	0	0	0	1	1	0	0	0	0	1	1	0	5.2	5.2	5.2	31.987	290	290;560	0	4.1491				By MS/MS	By MS/MS		0	0	0	5.2	5.2	0
O00267-2;O00267	O00267-2;O00267	2;2	2;2	2;2	Transcription elongation factor SPT5	SUPT5H	Isoform 2 of Transcription elongation factor SPT5 OS=Homo sapiens GN=SUPT5H;Transcription elongation factor SPT5 OS=Homo sapiens GN=SUPT5H PE=1 SV=1	2	2	2	2	0	0	0	2	1	0	0	0	0	2	1	0	0	0	0	2	1	0	2.3	2.3	2.3	120.5	1083	1083;1087	0	3.8151				By MS/MS	By MS/MS		0	0	0	2.3	0.9	0
O00299	O00299	1	1	1	Chloride intracellular channel protein 1	CLIC1	Chloride intracellular channel protein 1 OS=Homo sapiens GN=CLIC1 PE=1 SV=4	1	1	1	1	0	0	1	1	1	0	0	0	1	1	1	0	0	0	1	1	1	0	5	5	5	26.922	241	241	0	2.6848			By matching	By MS/MS	By MS/MS		0	0	5	5	5	0
O00311	O00311	1	1	1	Cell division cycle 7-related protein kinase	CDC7	Cell division cycle 7-related protein kinase OS=Homo sapiens GN=CDC7 PE=1 SV=1	1	1	1	1	0	0	0	1	1	0	0	0	0	1	1	0	0	0	0	1	1	0	1.2	1.2	1.2	63.887	574	574	0.001387	1.8666				By MS/MS	By MS/MS		0	0	0	1.2	1.2	0
O00329	O00329	1	1	1	Phosphatidylinositol 4,5-bisphosphate 3-kinase catalytic subunit delta isoform	PIK3CD	Phosphatidylinositol 4,5-bisphosphate 3-kinase catalytic subunit delta isoform OS=Homo sapiens GN=PIK3CD PE=1 SV=2	1	1	1	1	0	0	0	1	0	0	0	0	0	1	0	0	0	0	0	1	0	0	1.1	1.1	1.1	119.48	1044	1044	0.00075301	2.3215				By MS/MS			0	0	0	1.1	0	0
O00410-3;O00410;O00410-2	O00410-3;O00410;O00410-2	5;5;3	5;5;3	5;5;3	Importin-5	IPO5	Isoform 3 of Importin-5 OS=Homo sapiens GN=IPO5;Importin-5 OS=Homo sapiens GN=IPO5 PE=1 SV=4;Isoform 2 of Importin-5 OS=Homo sapiens GN=IPO5	3	5	5	5	0	0	0	5	5	0	0	0	0	5	5	0	0	0	0	5	5	0	3.7	3.7	3.7	125.54	1115	1115;1097;1037	0	65.449				By MS/MS	By MS/MS		0	0	0	3.7	3.7	0
O00411	O00411	3	3	3	DNA-directed RNA polymerase, mitochondrial	POLRMT	DNA-directed RNA polymerase, mitochondrial OS=Homo sapiens GN=POLRMT PE=1 SV=2	1	3	3	3	0	0	0	3	3	0	0	0	0	3	3	0	0	0	0	3	3	0	3.1	3.1	3.1	138.62	1230	1230	0	4.9802				By MS/MS	By MS/MS		0	0	0	3.1	3.1	0
O00425	O00425	1	1	1	Insulin-like growth factor 2 mRNA-binding protein 3	IGF2BP3	Insulin-like growth factor 2 mRNA-binding protein 3 OS=Homo sapiens GN=IGF2BP3 PE=1 SV=2	1	1	1	1	0	0	0	1	1	0	0	0	0	1	1	0	0	0	0	1	1	0	2.8	2.8	2.8	63.704	579	579	0.00074184	2.2678				By MS/MS	By MS/MS		0	0	0	2.8	2.8	0
O00429-7;O00429-3;O00429;O00429-6;O00429-4;O00429-5;O00429-2;O00429-8	O00429-7;O00429-3;O00429;O00429-6;O00429-4;O00429-5;O00429-2;O00429-8	3;3;3;3;2;2;2;2	3;3;3;3;2;2;2;2	3;3;3;3;2;2;2;2	Dynamin-1-like protein	DNM1L	Isoform 7 of Dynamin-1-like protein OS=Homo sapiens GN=DNM1L;Isoform 2 of Dynamin-1-like protein OS=Homo sapiens GN=DNM1L;Dynamin-1-like protein OS=Homo sapiens GN=DNM1L PE=1 SV=2;Isoform 6 of Dynamin-1-like protein OS=Homo sapiens GN=DNM1L;Isoform 3 of Dy	8	3	3	3	0	0	0	3	3	1	0	0	0	3	3	1	0	0	0	3	3	1	9	9	9	60.008	533	533;710;736;749;699;710;725;738	0	109.08				By MS/MS	By MS/MS	By matching	0	0	0	9	9	2.3
O00443-2;O00443	O00443-2;O00443	1;1	1;1	1;1	Phosphatidylinositol 4-phosphate 3-kinase C2 domain-containing subunit alpha	PIK3C2A	Isoform 2 of Phosphatidylinositol 4-phosphate 3-kinase C2 domain-containing subunit alpha OS=Homo sapiens GN=PIK3C2A;Phosphatidylinositol 4-phosphate 3-kinase C2 domain-containing subunit alpha OS=Homo sapiens GN=PIK3C2A PE=1 SV=2	2	1	1	1	0	0	0	1	1	0	0	0	0	1	1	0	0	0	0	1	1	0	4.3	4.3	4.3	53.741	483	483;1686	0	4.7958				By MS/MS	By MS/MS		0	0	0	4.3	4.3	0
O00479	O00479	4	3	3	High mobility group nucleosome-binding domain-containing protein 4	HMGN4	High mobility group nucleosome-binding domain-containing protein 4 OS=Homo sapiens GN=HMGN4 PE=1 SV=3	1	4	3	3	2	4	3	2	2	3	2	3	3	2	2	3	2	3	3	2	2	3	43.3	35.6	35.6	9.5388	90	90	0	33.751	By MS/MS	By MS/MS	By MS/MS	By MS/MS	By MS/MS	By MS/MS	33.3	43.3	35.6	21.1	21.1	35.6
O00505	O00505	1	1	1	Importin subunit alpha-4	KPNA3	Importin subunit alpha-4 OS=Homo sapiens GN=KPNA3 PE=1 SV=2	1	1	1	1	0	0	1	1	1	1	0	0	1	1	1	1	0	0	1	1	1	1	1.9	1.9	1.9	57.81	521	521	0	2.4552			By matching	By MS/MS	By MS/MS	By matching	0	0	1.9	1.9	1.9	1.9
O00541-2;O00541	O00541-2;O00541	4;4	4;4	4;4	Pescadillo homolog	PES1	Isoform 2 of Pescadillo homolog OS=Homo sapiens GN=PES1;Pescadillo homolog OS=Homo sapiens GN=PES1 PE=1 SV=1	2	4	4	4	1	2	2	4	4	2	1	2	2	4	4	2	1	2	2	4	4	2	6.3	6.3	6.3	67.455	583	583;588	0	61.93	By MS/MS	By MS/MS	By MS/MS	By MS/MS	By MS/MS	By MS/MS	1.9	1.9	1.9	6.3	6.3	1.9
O00566	O00566	1	1	1	U3 small nucleolar ribonucleoprotein protein MPP10	MPHOSPH10	U3 small nucleolar ribonucleoprotein protein MPP10 OS=Homo sapiens GN=MPHOSPH10 PE=1 SV=2	1	1	1	1	0	1	1	0	0	0	0	1	1	0	0	0	0	1	1	0	0	0	2.1	2.1	2.1	78.863	681	681	0	7.3415		By matching	By MS/MS				0	2.1	2.1	0	0	0
O00567	O00567	21	21	21	Nucleolar protein 56	NOP56	Nucleolar protein 56 OS=Homo sapiens GN=NOP56 PE=1 SV=4	1	21	21	21	14	12	13	13	12	17	14	12	13	13	12	17	14	12	13	13	12	17	37.7	37.7	37.7	66.049	594	594	0	115.91	By MS/MS	By MS/MS	By MS/MS	By MS/MS	By MS/MS	By MS/MS	23.2	20.7	21.4	22.6	18.9	27.8
O00571-2;O00571;Q9NQI0-3;Q9NQI0-2;Q9NQI0-4;Q9NQI0	O00571-2;O00571	7;7;1;1;1;1	7;7;1;1;1;1	3;3;0;0;0;0	ATP-dependent RNA helicase DDX3X	DDX3X	Isoform 2 of ATP-dependent RNA helicase DDX3X OS=Homo sapiens GN=DDX3X;ATP-dependent RNA helicase DDX3X OS=Homo sapiens GN=DDX3X PE=1 SV=3	6	7	7	3	1	2	2	7	5	2	1	2	2	7	5	2	0	1	1	3	2	1	12.2	12.2	4.8	71.354	646	646;662;575;690;704;724	0	16.384	By MS/MS	By matching	By MS/MS	By MS/MS	By MS/MS	By matching	1.7	3.1	3.1	12.2	8.7	3.1
O00622	O00622	8	8	8	Protein CYR61	CYR61	Protein CYR61 OS=Homo sapiens GN=CYR61 PE=1 SV=1	1	8	8	8	3	2	5	7	5	5	3	2	5	7	5	5	3	2	5	7	5	5	20.2	20.2	20.2	42.026	381	381	0	11.141	By MS/MS	By MS/MS	By MS/MS	By MS/MS	By MS/MS	By MS/MS	7.1	4.5	13.1	17.6	12.9	11.8
O00629	O00629	1	1	1	Importin subunit alpha-3	KPNA4	Importin subunit alpha-3 OS=Homo sapiens GN=KPNA4 PE=1 SV=1	1	1	1	1	0	0	0	1	1	0	0	0	0	1	1	0	0	0	0	1	1	0	1.9	1.9	1.9	57.886	521	521	0.00073099	2.1914				By MS/MS	By MS/MS		0	0	0	1.9	1.9	0
O14524-2;O14524	O14524-2;O14524	1;1	1;1	1;1	Transmembrane protein 194A	TMEM194A	Isoform 2 of Nuclear envelope integral membrane protein 1 OS=Homo sapiens GN=NEMP1;Nuclear envelope integral membrane protein 1 OS=Homo sapiens GN=NEMP1 PE=1 SV=2	2	1	1	1	0	0	0	1	1	0	0	0	0	1	1	0	0	0	0	1	1	0	3.2	3.2	3.2	42.032	371	371;444	0.0013908	1.8807				By MS/MS	By MS/MS		0	0	0	3.2	3.2	0
O14578-4;O14578;O14578-2	O14578-4;O14578	5;5;2	5;5;2	2;2;2	Citron Rho-interacting kinase	CIT	Isoform 4 of Citron Rho-interacting kinase OS=Homo sapiens GN=CIT;Citron Rho-interacting kinase OS=Homo sapiens GN=CIT PE=1 SV=2	3	5	5	2	0	0	0	3	5	0	0	0	0	3	5	0	0	0	0	1	2	0	2.6	2.6	1.2	236.6	2069	2069;2027;482	0	16.319				By MS/MS	By MS/MS		0	0	0	1.5	2.6	0
P47813;O14602	P47813;O14602	1;1	1;1	1;1	Eukaryotic translation initiation factor 1A, X-chromosomal;Eukaryotic translation initiation factor 1A, Y-chromosomal	EIF1AX;EIF1AY	Eukaryotic translation initiation factor 1A, X-chromosomal OS=Homo sapiens GN=EIF1AX PE=1 SV=2;Eukaryotic translation initiation factor 1A, Y-chromosomal OS=Homo sapiens GN=EIF1AY PE=1 SV=4	2	1	1	1	1	1	1	1	1	1	1	1	1	1	1	1	1	1	1	1	1	1	8.3	8.3	8.3	16.46	144	144;144	0	5.8492	By MS/MS	By MS/MS	By MS/MS	By MS/MS	By matching	By MS/MS	8.3	8.3	8.3	8.3	8.3	8.3
O14617-2;O14617-5;O14617-3;O14617;O14617-4	O14617-2;O14617-5;O14617-3;O14617;O14617-4	12;12;10;10;9	12;12;10;10;9	12;12;10;10;9	AP-3 complex subunit delta-1	AP3D1	Isoform 2 of AP-3 complex subunit delta-1 OS=Homo sapiens GN=AP3D1;Isoform 5 of AP-3 complex subunit delta-1 OS=Homo sapiens GN=AP3D1;Isoform 3 of AP-3 complex subunit delta-1 OS=Homo sapiens GN=AP3D1;AP-3 complex subunit delta-1 OS=Homo sapiens GN=AP3D1 P	5	12	12	12	1	3	6	9	8	8	1	3	6	9	8	8	1	3	6	9	8	8	13.5	13.5	13.5	125.04	1112	1112;1215;984;1153;1021	0	189.17	By MS/MS	By MS/MS	By MS/MS	By MS/MS	By MS/MS	By MS/MS	1.6	3.6	5.5	11.4	7.8	6.5
O14647;O14647-2;O14647-3	O14647;O14647-2	4;4;1	4;4;1	3;3;1	Chromodomain-helicase-DNA-binding protein 2	CHD2	Chromodomain-helicase-DNA-binding protein 2 OS=Homo sapiens GN=CHD2 PE=1 SV=2;Isoform 2 of Chromodomain-helicase-DNA-binding protein 2 OS=Homo sapiens GN=CHD2	3	4	4	3	3	1	1	2	3	1	3	1	1	2	3	1	2	1	1	1	2	1	2.2	2.2	1.8	211.34	1828	1828;1739;501	0	5.817	By MS/MS	By MS/MS	By matching	By MS/MS	By MS/MS	By matching	1.5	0.5	0.5	1.1	1.6	0.5
O14786-3;O14786-2;O14786	O14786-3;O14786-2;O14786	2;2;2	2;2;2	2;2;2	Neuropilin-1	NRP1	Isoform 3 of Neuropilin-1 OS=Homo sapiens GN=NRP1;Isoform 2 of Neuropilin-1 OS=Homo sapiens GN=NRP1;Neuropilin-1 OS=Homo sapiens GN=NRP1 PE=1 SV=3	3	2	2	2	0	0	0	2	2	0	0	0	0	2	2	0	0	0	0	2	2	0	4.4	4.4	4.4	68.375	609	609;644;923	0	15.226				By MS/MS	By MS/MS		0	0	0	4.4	4.4	0
O14828-2;O14828	O14828-2;O14828	1;1	1;1	1;1	Secretory carrier-associated membrane protein 3	SCAMP3	Isoform 2 of Secretory carrier-associated membrane protein 3 OS=Homo sapiens GN=SCAMP3;Secretory carrier-associated membrane protein 3 OS=Homo sapiens GN=SCAMP3 PE=1 SV=3	2	1	1	1	0	0	0	1	1	0	0	0	0	1	1	0	0	0	0	1	1	0	4	4	4	35.201	321	321;347	0.0013899	1.8728				By MS/MS	By MS/MS		0	0	0	4	4	0
O14929-2;O14929	O14929-2;O14929	1;1	1;1	1;1	Histone acetyltransferase type B catalytic subunit	HAT1	Isoform B of Histone acetyltransferase type B catalytic subunit OS=Homo sapiens GN=HAT1;Histone acetyltransferase type B catalytic subunit OS=Homo sapiens GN=HAT1 PE=1 SV=1	2	1	1	1	0	0	0	1	1	0	0	0	0	1	1	0	0	0	0	1	1	0	4.8	4.8	4.8	39.786	334	334;419	0	3.3034				By MS/MS	By MS/MS		0	0	0	4.8	4.8	0
O14972-2;O14972	O14972-2;O14972	1;1	1;1	1;1	Down syndrome critical region protein 3	DSCR3	Isoform 2 of Down syndrome critical region protein 3 OS=Homo sapiens GN=DSCR3;Down syndrome critical region protein 3 OS=Homo sapiens GN=DSCR3 PE=2 SV=1	2	1	1	1	0	0	0	0	1	0	0	0	0	0	1	0	0	0	0	0	1	0	6.3	6.3	6.3	29.884	270	270;297	0	3.4058					By MS/MS		0	0	0	0	6.3	0
O14974-5;O14974-2;O14974;O14974-4;O14974-3	O14974-5;O14974-2;O14974;O14974-4;O14974-3	5;5;5;4;4	5;5;5;4;4	5;5;5;4;4	Protein phosphatase 1 regulatory subunit 12A	PPP1R12A	Isoform 5 of Protein phosphatase 1 regulatory subunit 12A OS=Homo sapiens GN=PPP1R12A;Isoform 2 of Protein phosphatase 1 regulatory subunit 12A OS=Homo sapiens GN=PPP1R12A;Protein phosphatase 1 regulatory subunit 12A OS=Homo sapiens GN=PPP1R12A PE=1 SV=1;I	5	5	5	5	4	3	1	1	1	2	4	3	1	1	1	2	4	3	1	1	1	2	7.3	7.3	7.3	105.64	943	943;995;1030;971;974	0	78.824	By MS/MS	By MS/MS	By MS/MS	By MS/MS	By MS/MS	By MS/MS	6.3	4.5	1.8	1.8	1.8	3.4
O14979-3;O14979-2;O14979	O14979-3;O14979-2;O14979	2;2;2	2;2;2	2;2;2	Heterogeneous nuclear ribonucleoprotein D-like	HNRNPDL	Isoform 3 of Heterogeneous nuclear ribonucleoprotein D-like OS=Homo sapiens GN=HNRNPDL;Isoform 2 of Heterogeneous nuclear ribonucleoprotein D-like OS=Homo sapiens GN=HNRNPDL;Heterogeneous nuclear ribonucleoprotein D-like OS=Homo sapiens GN=HNRNPDL PE=1 SV=	3	2	2	2	0	0	0	0	0	2	0	0	0	0	0	2	0	0	0	0	0	2	11.5	11.5	11.5	27.191	244	244;301;420	0	5.8511						By MS/MS	0	0	0	0	0	11.5
O14980	O14980	4	4	4	Exportin-1	XPO1	Exportin-1 OS=Homo sapiens GN=XPO1 PE=1 SV=1	1	4	4	4	0	0	0	4	4	0	0	0	0	4	4	0	0	0	0	4	4	0	4.4	4.4	4.4	123.38	1071	1071	0	56.729				By MS/MS	By MS/MS		0	0	0	4.4	4.4	0
O14981	O14981	2	2	2	TATA-binding protein-associated factor 172	BTAF1	TATA-binding protein-associated factor 172 OS=Homo sapiens GN=BTAF1 PE=1 SV=2	1	2	2	2	0	0	0	2	2	0	0	0	0	2	2	0	0	0	0	2	2	0	1.9	1.9	1.9	206.89	1849	1849	0	18.412				By MS/MS	By MS/MS		0	0	0	1.9	1.9	0
O15014;O15014-2	O15014;O15014-2	7;4	7;4	7;4	Zinc finger protein 609	ZNF609	Zinc finger protein 609 OS=Homo sapiens GN=ZNF609 PE=1 SV=2;Isoform 2 of Zinc finger protein 609 OS=Homo sapiens GN=ZNF609	2	7	7	7	3	6	7	1	2	6	3	6	7	1	2	6	3	6	7	1	2	6	9.2	9.2	9.2	151.19	1411	1411;250	0	68.857	By MS/MS	By MS/MS	By MS/MS	By matching	By matching	By MS/MS	4	7.6	9.2	1.6	2.8	7.7
O15021-2;O15021-3;O15021-1;O15021	O15021-2;O15021-3;O15021-1;O15021	1;1;1;1	1;1;1;1	1;1;1;1	Microtubule-associated serine/threonine-protein kinase 4	MAST4	Isoform 2 of Microtubule-associated serine/threonine-protein kinase 4 OS=Homo sapiens GN=MAST4;Isoform 3 of Microtubule-associated serine/threonine-protein kinase 4 OS=Homo sapiens GN=MAST4;Isoform 5 of Microtubule-associated serine/threonine-protein kinas	4	1	1	1	0	1	1	0	0	1	0	1	1	0	0	1	0	1	1	0	0	1	0.6	0.6	0.6	264.76	2429	2429;2434;2444;2626	0.00073746	2.2331		By matching	By MS/MS			By MS/MS	0	0.6	0.6	0	0	0.6
O15027-2;O15027-4;O15027-3;O15027;O15027-5	O15027-2;O15027-4;O15027-3;O15027;O15027-5	1;1;1;1;1	1;1;1;1;1	1;1;1;1;1	Protein transport protein Sec16A	SEC16A	Isoform 2 of Protein transport protein Sec16A OS=Homo sapiens GN=SEC16A;Isoform 4 of Protein transport protein Sec16A OS=Homo sapiens GN=SEC16A;Isoform 3 of Protein transport protein Sec16A OS=Homo sapiens GN=SEC16A;Protein transport protein Sec16A OS=Homo	5	1	1	1	0	1	1	0	0	0	0	1	1	0	0	0	0	1	1	0	0	0	0.9	0.9	0.9	228.87	2134	2134;2154;2159;2179;2201	0	6.1531		By matching	By MS/MS				0	0.9	0.9	0	0	0
O15042;O15042-2;O15042-3	O15042;O15042-2	14;14;5	14;14;5	14;14;5	U2 snRNP-associated SURP motif-containing protein	U2SURP	U2 snRNP-associated SURP motif-containing protein OS=Homo sapiens GN=U2SURP PE=1 SV=2;Isoform 2 of U2 snRNP-associated SURP motif-containing protein OS=Homo sapiens GN=U2SURP	3	14	14	14	11	9	10	5	5	13	11	9	10	5	5	13	11	9	10	5	5	13	14.5	14.5	14.5	118.29	1029	1029;1028;620	0	48.488	By MS/MS	By MS/MS	By MS/MS	By MS/MS	By MS/MS	By MS/MS	11.1	9	9.7	6.5	4.7	13.8
O15118-2;O15118	O15118-2;O15118	1;1	1;1	1;1	Niemann-Pick C1 protein	NPC1	Isoform 2 of Niemann-Pick C1 protein OS=Homo sapiens GN=NPC1;Niemann-Pick C1 protein OS=Homo sapiens GN=NPC1 PE=1 SV=2	2	1	1	1	0	0	0	0	1	0	0	0	0	0	1	0	0	0	0	0	1	0	1.2	1.2	1.2	107.02	960	960;1278	0	2.6149					By MS/MS		0	0	0	0	1.2	0
O15143	O15143	1	1	1	Actin-related protein 2/3 complex subunit 1B	ARPC1B	Actin-related protein 2/3 complex subunit 1B OS=Homo sapiens GN=ARPC1B PE=1 SV=3	1	1	1	1	0	0	0	1	1	1	0	0	0	1	1	1	0	0	0	1	1	1	4.8	4.8	4.8	40.949	372	372	0	13.64				By MS/MS	By MS/MS	By matching	0	0	0	4.8	4.8	4.8
O15160-2;O15160	O15160-2;O15160	2;2	2;2	2;2	DNA-directed RNA polymerases I and III subunit RPAC1	POLR1C	Isoform 2 of DNA-directed RNA polymerases I and III subunit RPAC1 OS=Homo sapiens GN=POLR1C;DNA-directed RNA polymerases I and III subunit RPAC1 OS=Homo sapiens GN=POLR1C PE=1 SV=1	2	2	2	2	0	0	0	2	2	0	0	0	0	2	2	0	0	0	0	2	2	0	6.7	6.7	6.7	38.646	342	342;346	0	9.1778				By MS/MS	By MS/MS		0	0	0	6.7	6.7	0
O15162-2;O15162	O15162-2;O15162	1;1	1;1	1;1	Phospholipid scramblase 1	PLSCR1	Isoform 2 of Phospholipid scramblase 1 OS=Homo sapiens GN=PLSCR1;Phospholipid scramblase 1 OS=Homo sapiens GN=PLSCR1 PE=1 SV=1	2	1	1	1	1	1	1	1	1	1	1	1	1	1	1	1	1	1	1	1	1	1	4.2	4.2	4.2	26.825	237	237;318	0.00075245	2.319	By matching	By MS/MS	By MS/MS	By MS/MS	By MS/MS	By MS/MS	4.2	4.2	4.2	4.2	4.2	4.2
O15213	O15213	1	1	1	WD repeat-containing protein 46	WDR46	WD repeat-containing protein 46 OS=Homo sapiens GN=WDR46 PE=1 SV=3	1	1	1	1	0	0	0	0	0	1	0	0	0	0	0	1	0	0	0	0	0	1	3.1	3.1	3.1	68.07	610	610	0	16.027						By MS/MS	0	0	0	0	0	3.1
O15226;O15226-2	O15226;O15226-2	3;3	3;3	3;3	NF-kappa-B-repressing factor	NKRF	NF-kappa-B-repressing factor OS=Homo sapiens GN=NKRF PE=1 SV=2;Isoform 2 of NF-kappa-B-repressing factor OS=Homo sapiens GN=NKRF	2	3	3	3	0	0	0	3	2	1	0	0	0	3	2	1	0	0	0	3	2	1	5.7	5.7	5.7	77.672	690	690;705	0	5.3822				By MS/MS	By MS/MS	By matching	0	0	0	5.7	3.6	1.7
O15258	O15258	2	2	2	Protein RER1	RER1	Protein RER1 OS=Homo sapiens GN=RER1 PE=1 SV=1	1	2	2	2	0	0	0	2	1	0	0	0	0	2	1	0	0	0	0	2	1	0	18.9	18.9	18.9	22.958	196	196	0	5.0497				By MS/MS	By MS/MS		0	0	0	18.9	9.7	0
O15269	O15269	1	1	1	Serine palmitoyltransferase 1	SPTLC1	Serine palmitoyltransferase 1 OS=Homo sapiens GN=SPTLC1 PE=1 SV=1	1	1	1	1	0	0	0	1	1	0	0	0	0	1	1	0	0	0	0	1	1	0	2.3	2.3	2.3	52.743	473	473	0	5.4001				By MS/MS	By MS/MS		0	0	0	2.3	2.3	0
O15347	O15347	1	1	1	High mobility group protein B3	HMGB3	High mobility group protein B3 OS=Homo sapiens GN=HMGB3 PE=1 SV=4	1	1	1	1	1	1	1	0	1	1	1	1	1	0	1	1	1	1	1	0	1	1	6.5	6.5	6.5	22.98	200	200	0.0027211	1.7756	By MS/MS	By MS/MS	By MS/MS		By MS/MS	By matching	6.5	6.5	6.5	0	6.5	6.5
O15357-2;O15357	O15357-2;O15357	1;1	1;1	1;1	Phosphatidylinositol 3,4,5-trisphosphate 5-phosphatase 2	INPPL1	Isoform 2 of Phosphatidylinositol 3,4,5-trisphosphate 5-phosphatase 2 OS=Homo sapiens GN=INPPL1;Phosphatidylinositol 3,4,5-trisphosphate 5-phosphatase 2 OS=Homo sapiens GN=INPPL1 PE=1 SV=2	2	1	1	1	0	0	0	1	1	0	0	0	0	1	1	0	0	0	0	1	1	0	1.4	1.4	1.4	113.18	1016	1016;1258	0.0014276	2.0407				By MS/MS	By MS/MS		0	0	0	1.4	1.4	0
O15372	O15372	1	1	1	Eukaryotic translation initiation factor 3 subunit H	EIF3H	Eukaryotic translation initiation factor 3 subunit H OS=Homo sapiens GN=EIF3H PE=1 SV=1	1	1	1	1	0	0	0	1	1	0	0	0	0	1	1	0	0	0	0	1	1	0	5.4	5.4	5.4	39.93	352	352	0	6.0312				By MS/MS	By MS/MS		0	0	0	5.4	5.4	0
O15397;O15397-2	O15397;O15397-2	2;1	2;1	2;1	Importin-8	IPO8	Importin-8 OS=Homo sapiens GN=IPO8 PE=1 SV=2;Isoform 2 of Importin-8 OS=Homo sapiens GN=IPO8	2	2	2	2	0	0	0	2	1	0	0	0	0	2	1	0	0	0	0	2	1	0	2.4	2.4	2.4	119.94	1037	1037;832	0	8.0874				By MS/MS	By MS/MS		0	0	0	2.4	1.2	0
O15400-2;O15400	O15400-2;O15400	1;1	1;1	1;1	Syntaxin-7	STX7	Isoform 2 of Syntaxin-7 OS=Homo sapiens GN=STX7;Syntaxin-7 OS=Homo sapiens GN=STX7 PE=1 SV=4	2	1	1	1	0	0	0	1	1	0	0	0	0	1	1	0	0	0	0	1	1	0	6.3	6.3	6.3	27.4	239	239;261	0	2.6502				By MS/MS	By MS/MS		0	0	0	6.3	6.3	0
O15417;O15417-2	O15417;O15417-2	2;1	2;1	2;1	Trinucleotide repeat-containing gene 18 protein	TNRC18	Trinucleotide repeat-containing gene 18 protein OS=Homo sapiens GN=TNRC18 PE=1 SV=3;Isoform 2 of Trinucleotide repeat-containing gene 18 protein OS=Homo sapiens GN=TNRC18	2	2	2	2	0	2	1	0	0	0	0	2	1	0	0	0	0	2	1	0	0	0	1.2	1.2	1.2	314.52	2968	2968;2256	0	4.5163		By MS/MS	By matching				0	1.2	0.6	0	0	0
O15427	O15427	2	2	2	Monocarboxylate transporter 4	SLC16A3	Monocarboxylate transporter 4 OS=Homo sapiens GN=SLC16A3 PE=1 SV=1	1	2	2	2	0	1	2	2	0	0	0	1	2	2	0	0	0	1	2	2	0	0	6.5	6.5	6.5	49.469	465	465	0	2.907		By matching	By MS/MS	By MS/MS			0	3.7	6.5	6.5	0	0
O15446;O15446-2	O15446;O15446-2	12;11	12;11	12;11	DNA-directed RNA polymerase I subunit RPA34	CD3EAP	DNA-directed RNA polymerase I subunit RPA34 OS=Homo sapiens GN=CD3EAP PE=1 SV=1;Isoform 2 of DNA-directed RNA polymerase I subunit RPA34 OS=Homo sapiens GN=CD3EAP	2	12	12	12	5	5	7	4	4	11	5	5	7	4	4	11	5	5	7	4	4	11	34.9	34.9	34.9	54.985	510	510;512	0	199.76	By MS/MS	By MS/MS	By MS/MS	By MS/MS	By MS/MS	By MS/MS	16.5	15.3	19	11.6	13.1	32.2
O15479	O15479	2	2	2	Melanoma-associated antigen B2	MAGEB2	Melanoma-associated antigen B2 OS=Homo sapiens GN=MAGEB2 PE=1 SV=3	1	2	2	2	2	2	2	2	1	2	2	2	2	2	1	2	2	2	2	2	1	2	7.8	7.8	7.8	35.277	319	319	0	5.5511	By MS/MS	By MS/MS	By MS/MS	By matching	By matching	By MS/MS	7.8	7.8	7.8	7.8	2.8	7.8
O43143	O43143	3	3	3	Pre-mRNA-splicing factor ATP-dependent RNA helicase DHX15	DHX15	Pre-mRNA-splicing factor ATP-dependent RNA helicase DHX15 OS=Homo sapiens GN=DHX15 PE=1 SV=2	1	3	3	3	1	1	3	3	3	3	1	1	3	3	3	3	1	1	3	3	3	3	4.3	4.3	4.3	90.932	795	795	0	19.224	By MS/MS	By MS/MS	By MS/MS	By MS/MS	By MS/MS	By MS/MS	1.4	1.4	4.3	4.3	4.3	4.3
O43159	O43159	13	13	13	Ribosomal RNA-processing protein 8	RRP8	Ribosomal RNA-processing protein 8 OS=Homo sapiens GN=RRP8 PE=1 SV=2	1	13	13	13	9	10	9	4	5	10	9	10	9	4	5	10	9	10	9	4	5	10	25	25	25	50.714	456	456	0	159.2	By MS/MS	By MS/MS	By MS/MS	By MS/MS	By MS/MS	By MS/MS	17.5	24.8	21.7	13.4	13.4	24.8
O43166-3;O43166-2;O43166	O43166-3;O43166-2;O43166	2;2;2	2;2;2	2;2;2	Signal-induced proliferation-associated 1-like protein 1	SIPA1L1	Isoform 3 of Signal-induced proliferation-associated 1-like protein 1 OS=Homo sapiens GN=SIPA1L1;Isoform 2 of Signal-induced proliferation-associated 1-like protein 1 OS=Homo sapiens GN=SIPA1L1;Signal-induced proliferation-associated 1-like protein 1 OS=Ho	3	2	2	2	0	0	0	1	2	0	0	0	0	1	2	0	0	0	0	1	2	0	1.6	1.6	1.6	197.41	1782	1782;1783;1804	0	17.65				By MS/MS	By MS/MS		0	0	0	0.6	1.6	0
O43172-2;O43172	O43172-2;O43172	1;1	1;1	1;1	U4/U6 small nuclear ribonucleoprotein Prp4	PRPF4	Isoform 2 of U4/U6 small nuclear ribonucleoprotein Prp4 OS=Homo sapiens GN=PRPF4;U4/U6 small nuclear ribonucleoprotein Prp4 OS=Homo sapiens GN=PRPF4 PE=1 SV=2	2	1	1	1	0	0	0	1	1	0	0	0	0	1	1	0	0	0	0	1	1	0	2.3	2.3	2.3	58.32	521	521;522	0.00075019	2.3106				By MS/MS	By MS/MS		0	0	0	2.3	2.3	0
O43175	O43175	1	1	1	D-3-phosphoglycerate dehydrogenase	PHGDH	D-3-phosphoglycerate dehydrogenase OS=Homo sapiens GN=PHGDH PE=1 SV=4	1	1	1	1	0	0	0	1	1	0	0	0	0	1	1	0	0	0	0	1	1	0	2.4	2.4	2.4	56.65	533	533	0	4.6655				By MS/MS	By MS/MS		0	0	0	2.4	2.4	0
O43237-2;O43237	O43237-2;O43237	2;2	2;2	2;2	Cytoplasmic dynein 1 light intermediate chain 2	DYNC1LI2	Isoform 2 of Cytoplasmic dynein 1 light intermediate chain 2 OS=Homo sapiens GN=DYNC1LI2;Cytoplasmic dynein 1 light intermediate chain 2 OS=Homo sapiens GN=DYNC1LI2 PE=1 SV=1	2	2	2	2	0	0	0	2	1	0	0	0	0	2	1	0	0	0	0	2	1	0	4.6	4.6	4.6	45.004	415	415;492	0	4.8567				By MS/MS	By MS/MS		0	0	0	4.6	4.1	0
O43242;O43242-2	O43242;O43242-2	8;5	8;5	8;5	26S proteasome non-ATPase regulatory subunit 3	PSMD3	26S proteasome non-ATPase regulatory subunit 3 OS=Homo sapiens GN=PSMD3 PE=1 SV=2;Isoform 2 of 26S proteasome non-ATPase regulatory subunit 3 OS=Homo sapiens GN=PSMD3	2	8	8	8	0	0	1	7	7	0	0	0	1	7	7	0	0	0	1	7	7	0	13.5	13.5	13.5	60.977	534	534;356	0	22.684			By matching	By MS/MS	By MS/MS		0	0	1.5	10.9	11	0
O43264-2;O43264	O43264-2;O43264	1;1	1;1	1;1	Centromere/kinetochore protein zw10 homolog	ZW10	Isoform 2 of Centromere/kinetochore protein zw10 homolog OS=Homo sapiens GN=ZW10;Centromere/kinetochore protein zw10 homolog OS=Homo sapiens GN=ZW10 PE=1 SV=3	2	1	1	1	0	0	0	1	1	0	0	0	0	1	1	0	0	0	0	1	1	0	1.9	1.9	1.9	76.806	672	672;779	0.0014055	1.9607				By MS/MS	By MS/MS		0	0	0	1.9	1.9	0
O43290	O43290	6	6	6	U4/U6.U5 tri-snRNP-associated protein 1	SART1	U4/U6.U5 tri-snRNP-associated protein 1 OS=Homo sapiens GN=SART1 PE=1 SV=1	1	6	6	6	5	4	3	0	0	4	5	4	3	0	0	4	5	4	3	0	0	4	7.8	7.8	7.8	90.254	800	800	0	75.22	By MS/MS	By MS/MS	By MS/MS			By MS/MS	6.6	5.9	4.8	0	0	5.9
O43390-4;O43390;O43390-2;O43390-3;O60506-2;O60506	O43390-4;O43390;O43390-2;O43390-3	7;7;7;6;3;3	7;7;7;6;3;3	4;4;4;4;0;0	Heterogeneous nuclear ribonucleoprotein R	HNRNPR	Isoform 4 of Heterogeneous nuclear ribonucleoprotein R OS=Homo sapiens GN=HNRNPR;Heterogeneous nuclear ribonucleoprotein R OS=Homo sapiens GN=HNRNPR PE=1 SV=1;Isoform 2 of Heterogeneous nuclear ribonucleoprotein R OS=Homo sapiens GN=HNRNPR;Isoform 3 of Het	6	7	7	4	3	2	4	3	3	7	3	2	4	3	3	7	1	1	2	2	2	4	12.9	12.9	7.7	59.952	535	535;633;636;595;588;623	0	15.37	By MS/MS	By MS/MS	By MS/MS	By MS/MS	By MS/MS	By MS/MS	6	4.5	6.7	5.2	5.2	12.9
O43396	O43396	1	1	1	Thioredoxin-like protein 1	TXNL1	Thioredoxin-like protein 1 OS=Homo sapiens GN=TXNL1 PE=1 SV=3	1	1	1	1	0	0	0	1	1	0	0	0	0	1	1	0	0	0	0	1	1	0	5.2	5.2	5.2	32.251	289	289	0	15.447				By MS/MS	By MS/MS		0	0	0	5.2	5.2	0
O43583	O43583	6	6	6	Density-regulated protein	DENR	Density-regulated protein OS=Homo sapiens GN=DENR PE=1 SV=2	1	6	6	6	4	5	6	1	2	5	4	5	6	1	2	5	4	5	6	1	2	5	26.8	26.8	26.8	22.092	198	198	0	21.925	By MS/MS	By MS/MS	By MS/MS	By matching	By MS/MS	By MS/MS	25.8	26.8	26.8	8.6	18.7	26.8
O43592	O43592	1	1	1	Exportin-T	XPOT	Exportin-T OS=Homo sapiens GN=XPOT PE=1 SV=2	1	1	1	1	0	0	0	1	1	0	0	0	0	1	1	0	0	0	0	1	1	0	1.2	1.2	1.2	109.96	962	962	0.0047138	1.6994				By MS/MS	By MS/MS		0	0	0	1.2	1.2	0
O43660-2;O43660	O43660-2;O43660	2;2	2;2	2;2	Pleiotropic regulator 1	PLRG1	Isoform 2 of Pleiotropic regulator 1 OS=Homo sapiens GN=PLRG1;Pleiotropic regulator 1 OS=Homo sapiens GN=PLRG1 PE=1 SV=1	2	2	2	2	0	0	1	0	0	2	0	0	1	0	0	2	0	0	1	0	0	2	5.7	5.7	5.7	56.289	505	505;514	0	3.7321			By MS/MS			By MS/MS	0	0	3.6	0	0	5.7
O43670-2;O43670;O43670-4	O43670-2;O43670;O43670-4	1;1;1	1;1;1	1;1;1	BUB3-interacting and GLEBS motif-containing protein ZNF207	ZNF207	Isoform 2 of BUB3-interacting and GLEBS motif-containing protein ZNF207 OS=Homo sapiens GN=ZNF207;BUB3-interacting and GLEBS motif-containing protein ZNF207 OS=Homo sapiens GN=ZNF207 PE=1 SV=1;Isoform 4 of BUB3-interacting and GLEBS motif-containing protei	3	1	1	1	1	1	1	1	0	1	1	1	1	1	0	1	1	1	1	1	0	1	2.8	2.8	2.8	49.692	463	463;478;494	0.0020633	1.8222	By MS/MS	By MS/MS	By MS/MS	By matching		By MS/MS	2.8	2.8	2.8	2.8	0	2.8
O43684-2;O43684	O43684-2;O43684	4;4	4;4	4;4	Mitotic checkpoint protein BUB3	BUB3	Isoform 2 of Mitotic checkpoint protein BUB3 OS=Homo sapiens GN=BUB3;Mitotic checkpoint protein BUB3 OS=Homo sapiens GN=BUB3 PE=1 SV=1	2	4	4	4	0	1	2	2	1	4	0	1	2	2	1	4	0	1	2	2	1	4	14.4	14.4	14.4	36.954	326	326;328	0	14.851		By MS/MS	By MS/MS	By MS/MS	By MS/MS	By MS/MS	0	4	8	8	4	14.4
O43747;O43747-2	O43747;O43747-2	1;1	1;1	1;1	AP-1 complex subunit gamma-1	AP1G1	AP-1 complex subunit gamma-1 OS=Homo sapiens GN=AP1G1 PE=1 SV=5;Isoform 2 of AP-1 complex subunit gamma-1 OS=Homo sapiens GN=AP1G1	2	1	1	1	0	0	0	1	1	0	0	0	0	1	1	0	0	0	0	1	1	0	1.6	1.6	1.6	91.35	822	822;825	0.00072939	2.1594				By MS/MS	By MS/MS		0	0	0	1.6	1.6	0
O43768-8;O43768-2;O43768;O43768-9;O43768-3;O43768-4	O43768-8;O43768-2;O43768;O43768-9;O43768-3;O43768-4	1;1;1;1;1;1	1;1;1;1;1;1	1;1;1;1;1;1	Alpha-endosulfine	ENSA	Isoform 8 of Alpha-endosulfine OS=Homo sapiens GN=ENSA;Isoform 2 of Alpha-endosulfine OS=Homo sapiens GN=ENSA;Alpha-endosulfine OS=Homo sapiens GN=ENSA PE=1 SV=1;Isoform 9 of Alpha-endosulfine OS=Homo sapiens GN=ENSA;Isoform 3 of Alpha-endosulfine OS=Homo	6	1	1	1	0	0	0	0	1	0	0	0	0	0	1	0	0	0	0	0	1	0	21.9	21.9	21.9	11.99	105	105;117;121;133;137;140	0	13.328					By MS/MS		0	0	0	0	21.9	0
O43772	O43772	2	2	2	Mitochondrial carnitine/acylcarnitine carrier protein	SLC25A20	Mitochondrial carnitine/acylcarnitine carrier protein OS=Homo sapiens GN=SLC25A20 PE=1 SV=1	1	2	2	2	0	0	0	2	1	0	0	0	0	2	1	0	0	0	0	2	1	0	7.3	7.3	7.3	32.943	301	301	0	3.2128				By MS/MS	By MS/MS		0	0	0	7.3	3	0
O43795-2;O43795	O43795-2;O43795	4;4	4;4	4;4	Unconventional myosin-Ib	MYO1B	Isoform 2 of Unconventional myosin-Ib OS=Homo sapiens GN=MYO1B;Unconventional myosin-Ib OS=Homo sapiens GN=MYO1B PE=1 SV=3	2	4	4	4	1	1	1	4	3	1	1	1	1	4	3	1	1	1	1	4	3	1	4	4	4	124.95	1078	1078;1136	0	10.677	By matching	By MS/MS	By MS/MS	By MS/MS	By MS/MS	By MS/MS	0.8	0.8	0.8	4	2.6	0.8
O43818	O43818	7	7	7	U3 small nucleolar RNA-interacting protein 2	RRP9	U3 small nucleolar RNA-interacting protein 2 OS=Homo sapiens GN=RRP9 PE=1 SV=1	1	7	7	7	6	5	6	2	2	7	6	5	6	2	2	7	6	5	6	2	2	7	13.9	13.9	13.9	51.84	475	475	0	323.31	By MS/MS	By MS/MS	By MS/MS	By MS/MS	By MS/MS	By MS/MS	12	10.1	12	4.4	4.4	13.9
O60231	O60231	2	2	2	Putative pre-mRNA-splicing factor ATP-dependent RNA helicase DHX16	DHX16	Putative pre-mRNA-splicing factor ATP-dependent RNA helicase DHX16 OS=Homo sapiens GN=DHX16 PE=1 SV=2	1	2	2	2	1	1	1	1	2	1	1	1	1	1	2	1	1	1	1	1	2	1	2.5	2.5	2.5	119.26	1041	1041	0	6.4932	By MS/MS	By MS/MS	By MS/MS	By matching	By MS/MS	By MS/MS	1.2	1.2	1.2	1.2	2.5	1.2
O60244	O60244	2	2	2	Mediator of RNA polymerase II transcription subunit 14	MED14	Mediator of RNA polymerase II transcription subunit 14 OS=Homo sapiens GN=MED14 PE=1 SV=2	1	2	2	2	1	0	0	2	2	0	1	0	0	2	2	0	1	0	0	2	2	0	2.3	2.3	2.3	160.6	1454	1454	0	6.2732	By matching			By MS/MS	By MS/MS		1.2	0	0	2.3	2.3	0
O60264	O60264	8	8	5	SWI/SNF-related matrix-associated actin-dependent regulator of chromatin subfamily A member 5	SMARCA5	SWI/SNF-related matrix-associated actin-dependent regulator of chromatin subfamily A member 5 OS=Homo sapiens GN=SMARCA5 PE=1 SV=1	1	8	8	5	2	2	2	8	8	2	2	2	2	8	8	2	2	2	1	5	5	1	6.6	6.6	4.1	121.9	1052	1052	0	96.042	By matching	By matching	By matching	By MS/MS	By MS/MS	By MS/MS	1.7	1.6	1.7	6.6	6.6	1.7
O60287	O60287	7	7	7	Nucleolar pre-ribosomal-associated protein 1	URB1	Nucleolar pre-ribosomal-associated protein 1 OS=Homo sapiens GN=URB1 PE=1 SV=4	1	7	7	7	0	0	0	7	5	0	0	0	0	7	5	0	0	0	0	7	5	0	3.6	3.6	3.6	254.39	2271	2271	0	17.548				By MS/MS	By MS/MS		0	0	0	3.6	2.5	0
O60292	O60292	2	2	2	Signal-induced proliferation-associated 1-like protein 3	SIPA1L3	Signal-induced proliferation-associated 1-like protein 3 OS=Homo sapiens GN=SIPA1L3 PE=1 SV=3	1	2	2	2	0	0	1	1	1	0	0	0	1	1	1	0	0	0	1	1	1	0	1.8	1.8	1.8	194.61	1781	1781	0	4.9953			By matching	By MS/MS	By MS/MS		0	0	0.7	1.1	0.7	0
O60293-2;O60293	O60293-2;O60293	2;2	2;2	2;2	Zinc finger C3H1 domain-containing protein	ZFC3H1	Isoform 2 of Zinc finger C3H1 domain-containing protein OS=Homo sapiens GN=ZFC3H1;Zinc finger C3H1 domain-containing protein OS=Homo sapiens GN=ZFC3H1 PE=1 SV=3	2	2	2	2	1	2	1	2	2	2	1	2	1	2	2	2	1	2	1	2	2	2	1.5	1.5	1.5	217.49	1910	1910;1989	0	15.974	By MS/MS	By MS/MS	By matching	By MS/MS	By MS/MS	By matching	0.9	1.5	0.9	1.5	1.5	1.5
O60294	O60294	1	1	1	tRNA wybutosine-synthesizing protein 4	LCMT2	tRNA wybutosine-synthesizing protein 4 OS=Homo sapiens GN=LCMT2 PE=1 SV=3	1	1	1	1	0	0	0	1	1	0	0	0	0	1	1	0	0	0	0	1	1	0	1.6	1.6	1.6	75.601	686	686	0.0014482	2.1284				By MS/MS	By MS/MS		0	0	0	1.6	1.6	0
O60306	O60306	4	4	4	Intron-binding protein aquarius	AQR	Intron-binding protein aquarius OS=Homo sapiens GN=AQR PE=1 SV=4	1	4	4	4	0	0	0	4	4	0	0	0	0	4	4	0	0	0	0	4	4	0	2.4	2.4	2.4	171.29	1485	1485	0	51.553				By MS/MS	By MS/MS		0	0	0	2.4	2.4	0
O60427	O60427	1	1	1	Fatty acid desaturase 1	FADS1	Fatty acid desaturase 1 OS=Homo sapiens GN=FADS1 PE=1 SV=3	1	1	1	1	0	0	0	1	1	0	0	0	0	1	1	0	0	0	0	1	1	0	3.8	3.8	3.8	51.964	444	444	0	3.4644				By MS/MS	By MS/MS		0	0	0	3.8	3.8	0
O60488-2;O60488	O60488-2;O60488	2;2	2;2	2;2	Long-chain-fatty-acid--CoA ligase 4	ACSL4	Isoform Short of Long-chain-fatty-acid--CoA ligase 4 OS=Homo sapiens GN=ACSL4;Long-chain-fatty-acid--CoA ligase 4 OS=Homo sapiens GN=ACSL4 PE=1 SV=2	2	2	2	2	0	0	0	1	2	0	0	0	0	1	2	0	0	0	0	1	2	0	3.9	3.9	3.9	74.435	670	670;711	0	3.7297				By MS/MS	By MS/MS		0	0	0	2.2	3.9	0
O60493-3;O60493-2;O60493-4;O60493	O60493-3;O60493-2;O60493-4;O60493	1;1;1;1	1;1;1;1	1;1;1;1	Sorting nexin-3	SNX3	Isoform 3 of Sorting nexin-3 OS=Homo sapiens GN=SNX3;Isoform 2 of Sorting nexin-3 OS=Homo sapiens GN=SNX3;Isoform 4 of Sorting nexin-3 OS=Homo sapiens GN=SNX3;Sorting nexin-3 OS=Homo sapiens GN=SNX3 PE=1 SV=3	4	1	1	1	0	0	0	1	1	1	0	0	0	1	1	1	0	0	0	1	1	1	8	8	8	13.172	113	113;130;140;162	0.0046543	1.6666				By MS/MS	By MS/MS	By matching	0	0	0	8	8	8
O60508	O60508	1	1	1	Pre-mRNA-processing factor 17	CDC40	Pre-mRNA-processing factor 17 OS=Homo sapiens GN=CDC40 PE=1 SV=1	1	1	1	1	0	1	0	0	0	1	0	1	0	0	0	1	0	1	0	0	0	1	2.1	2.1	2.1	65.521	579	579	0	6.3959		By MS/MS				By MS/MS	0	2.1	0	0	0	2.1
O60518	O60518	2	2	2	Ran-binding protein 6	RANBP6	Ran-binding protein 6 OS=Homo sapiens GN=RANBP6 PE=1 SV=2	1	2	2	2	0	0	0	2	1	1	0	0	0	2	1	1	0	0	0	2	1	1	2.4	2.4	2.4	124.71	1105	1105	0	14.398				By MS/MS	By MS/MS	By matching	0	0	0	2.4	1.2	1.3
O60524-2;O60524-4;O60524-5;O60524-3;O60524	O60524-2;O60524-4;O60524-5;O60524-3;O60524	1;1;1;1;1	1;1;1;1;1	1;1;1;1;1	Nuclear export mediator factor NEMF	NEMF	Isoform 2 of Nuclear export mediator factor NEMF OS=Homo sapiens GN=NEMF;Isoform 4 of Nuclear export mediator factor NEMF OS=Homo sapiens GN=NEMF;Isoform 5 of Nuclear export mediator factor NEMF OS=Homo sapiens GN=NEMF;Isoform 3 of Nuclear export mediator	5	1	1	1	1	0	1	0	0	0	1	0	1	0	0	0	1	0	1	0	0	0	3.6	3.6	3.6	31.15	276	276;1034;1051;1055;1076	0.0014451	2.1121	By MS/MS		By MS/MS				3.6	0	3.6	0	0	0
O60563	O60563	1	1	1	Cyclin-T1	CCNT1	Cyclin-T1 OS=Homo sapiens GN=CCNT1 PE=1 SV=1	1	1	1	1	0	1	0	1	1	0	0	1	0	1	1	0	0	1	0	1	1	0	1.4	1.4	1.4	80.684	726	726	0.0020704	1.8432		By matching		By MS/MS	By MS/MS		0	1.4	0	1.4	1.4	0
O60583-2;O60583	O60583-2;O60583	1;1	1;1	1;1	Cyclin-T2	CCNT2	Isoform 2 of Cyclin-T2 OS=Homo sapiens GN=CCNT2;Cyclin-T2 OS=Homo sapiens GN=CCNT2 PE=1 SV=2	2	1	1	1	1	1	1	0	0	1	1	1	1	0	0	1	1	1	1	0	0	1	2.7	2.7	2.7	73.681	663	663;730	0	4.9485	By MS/MS	By MS/MS	By MS/MS			By MS/MS	2.7	2.7	2.7	0	0	2.7
O60684	O60684	1	1	1	Importin subunit alpha-7	KPNA6	Importin subunit alpha-7 OS=Homo sapiens GN=KPNA6 PE=1 SV=1	1	1	1	1	0	0	0	0	1	0	0	0	0	0	1	0	0	0	0	0	1	0	2.4	2.4	2.4	60.029	536	536	0.0083925	1.4646					By MS/MS		0	0	0	0	2.4	0
P41567;O60739	P41567;O60739	2;2	2;2	2;2	Eukaryotic translation initiation factor 1;Eukaryotic translation initiation factor 1b	EIF1;EIF1B	Eukaryotic translation initiation factor 1 OS=Homo sapiens GN=EIF1 PE=1 SV=1;Eukaryotic translation initiation factor 1b OS=Homo sapiens GN=EIF1B PE=1 SV=2	2	2	2	2	1	0	1	0	0	2	1	0	1	0	0	2	1	0	1	0	0	2	13.3	13.3	13.3	12.732	113	113;113	0	4.7818	By MS/MS		By matching			By MS/MS	13.3	0	13.3	0	0	13.3
O60762	O60762	1	1	1	Dolichol-phosphate mannosyltransferase subunit 1	DPM1	Dolichol-phosphate mannosyltransferase subunit 1 OS=Homo sapiens GN=DPM1 PE=1 SV=1	1	1	1	1	0	0	0	1	1	0	0	0	0	1	1	0	0	0	0	1	1	0	4.2	4.2	4.2	29.634	260	260	0	3.8393				By MS/MS	By MS/MS		0	0	0	4.2	4.2	0
O60763;O60763-2	O60763;O60763-2	6;6	6;6	6;6	General vesicular transport factor p115	USO1	General vesicular transport factor p115 OS=Homo sapiens GN=USO1 PE=1 SV=2;Isoform 2 of General vesicular transport factor p115 OS=Homo sapiens GN=USO1	2	6	6	6	0	1	0	5	5	1	0	1	0	5	5	1	0	1	0	5	5	1	9.1	9.1	9.1	107.89	962	962;973	0	59.289		By matching		By MS/MS	By MS/MS	By matching	0	0.9	0	8.2	7.9	0.9
Q16778;P62807;P57053;P06899;O60814;Q99880;Q99877;Q93079;Q5QNW6;P58876;P33778;P23527;Q96A08;Q5QNW6-2;Q8N257	Q16778;P62807;P57053;P06899;O60814;Q99880;Q99877;Q93079;Q5QNW6;P58876;P33778;P23527;Q96A08;Q5QNW6-2;Q8N257	6;6;6;6;6;5;5;5;5;5;5;5;5;5;4	1;1;1;1;1;0;0;0;0;0;0;0;0;0;0	1;1;1;1;1;0;0;0;0;0;0;0;0;0;0	Histone H2B type 2-E;Histone H2B type 1-C/E/F/G/I;Histone H2B type F-S;Histone H2B type 1-J;Histone H2B type 1-K;Histone H2B type 1-L;Histone H2B type 1-N;Histone H2B type 1-H;Histone H2B type 2-F;Histone H2B type 1-D;Histone H2B type 1-B;Histone H2B type 1-O;Histone H2B type 1-A;Histone H2B type 3-B	HIST2H2BE;HIST1H2BC;H2BFS;HIST1H2BJ;HIST1H2BK;HIST1H2BL;HIST1H2BN;HIST1H2BH;HIST2H2BF;HIST1H2BD;HIST1H2BB;HIST1H2BO;HIST1H2BA;HIST3H2BB	Histone H2B type 2-E OS=Homo sapiens GN=HIST2H2BE PE=1 SV=3;Histone H2B type 1-C/E/F/G/I OS=Homo sapiens GN=HIST1H2BC PE=1 SV=4;Histone H2B type F-S OS=Homo sapiens GN=H2BFS PE=1 SV=2;Histone H2B type 1-J OS=Homo sapiens GN=HIST1H2BJ PE=1 SV=3;Histone H2B	15	6	1	1	5	4	6	4	3	6	0	0	1	0	0	1	0	0	1	0	0	1	39.7	8.7	8.7	13.92	126	126;126;126;126;126;126;126;126;126;126;126;126;127;134;126	0.0077821	1.4962	By matching	By matching	By MS/MS	By matching	By matching	By MS/MS	31	31	39.7	27.8	20.6	39.7
O60828-2;O60828;O60828-5;O60828-4;O60828-6;O60828-3;O60828-10;O60828-9;O60828-8;O60828-7	O60828-2;O60828;O60828-5;O60828-4;O60828-6;O60828-3	4;4;3;3;2;2;1;1;1;1	4;4;3;3;2;2;1;1;1;1	4;4;3;3;2;2;1;1;1;1	Polyglutamine-binding protein 1	PQBP1	Isoform 2 of Polyglutamine-binding protein 1 OS=Homo sapiens GN=PQBP1;Polyglutamine-binding protein 1 OS=Homo sapiens GN=PQBP1 PE=1 SV=1;Isoform 5 of Polyglutamine-binding protein 1 OS=Homo sapiens GN=PQBP1;Isoform 4 of Polyglutamine-binding protein 1 OS=H	10	4	4	4	2	2	1	0	1	3	2	2	1	0	1	3	2	2	1	0	1	3	18.2	18.2	18.2	30.401	264	264;265;165;170;149;224;60;67;73;128	0	8.958	By MS/MS	By MS/MS	By MS/MS		By matching	By MS/MS	8	8	4.5	0	3.4	14.8
O60832;O60832-2	O60832	13;5	13;5	13;5	H/ACA ribonucleoprotein complex subunit 4	DKC1	H/ACA ribonucleoprotein complex subunit 4 OS=Homo sapiens GN=DKC1 PE=1 SV=3	2	13	13	13	7	9	10	5	7	11	7	9	10	5	7	11	7	9	10	5	7	11	25.5	25.5	25.5	57.673	514	514;420	0	100.83	By MS/MS	By MS/MS	By MS/MS	By MS/MS	By MS/MS	By MS/MS	14.8	15.6	16.5	10.3	13	23.5
O60841	O60841	43	43	43	Eukaryotic translation initiation factor 5B	EIF5B	Eukaryotic translation initiation factor 5B OS=Homo sapiens GN=EIF5B PE=1 SV=4	1	43	43	43	29	27	28	27	23	37	29	27	28	27	23	37	29	27	28	27	23	37	27.7	27.7	27.7	138.83	1220	1220	0	323.31	By MS/MS	By MS/MS	By MS/MS	By MS/MS	By MS/MS	By MS/MS	20.3	19.8	19.5	19.3	17.9	24.3
O60869;O60869-2;O60869-3	O60869;O60869-2;O60869-3	6;5;5	6;5;5	6;5;5	Endothelial differentiation-related factor 1	EDF1	Endothelial differentiation-related factor 1 OS=Homo sapiens GN=EDF1 PE=1 SV=1;Isoform 2 of Endothelial differentiation-related factor 1 OS=Homo sapiens GN=EDF1;Isoform 3 of Endothelial differentiation-related factor 1 OS=Homo sapiens GN=EDF1	3	6	6	6	1	2	4	0	0	6	1	2	4	0	0	6	1	2	4	0	0	6	44.6	44.6	44.6	16.368	148	148;139;141	0	14.121	By MS/MS	By MS/MS	By MS/MS			By MS/MS	5.4	12.2	29.1	0	0	44.6
O60884	O60884	1	1	1	DnaJ homolog subfamily A member 2	DNAJA2	DnaJ homolog subfamily A member 2 OS=Homo sapiens GN=DNAJA2 PE=1 SV=1	1	1	1	1	1	1	1	1	1	1	1	1	1	1	1	1	1	1	1	1	1	1	3.2	3.2	3.2	45.745	412	412	0	4.9995	By MS/MS	By MS/MS	By MS/MS	By MS/MS	By MS/MS	By matching	3.2	3.2	3.2	3.2	3.2	3.2
O60885;O60885-2;O60885-3	O60885;O60885-2;O60885-3	19;13;13	19;13;13	16;10;10	Bromodomain-containing protein 4	BRD4	Bromodomain-containing protein 4 OS=Homo sapiens GN=BRD4 PE=1 SV=2;Isoform C of Bromodomain-containing protein 4 OS=Homo sapiens GN=BRD4;Isoform B of Bromodomain-containing protein 4 OS=Homo sapiens GN=BRD4	3	19	19	16	14	15	13	1	2	18	14	15	13	1	2	18	12	13	12	1	1	15	15.7	15.7	13.1	152.22	1362	1362;722;794	0	114.65	By MS/MS	By MS/MS	By MS/MS	By MS/MS	By MS/MS	By MS/MS	13.2	12.8	9.5	0.7	1.4	13.1
O60927	O60927	1	1	1	Protein phosphatase 1 regulatory subunit 11	PPP1R11	Protein phosphatase 1 regulatory subunit 11 OS=Homo sapiens GN=PPP1R11 PE=1 SV=1	1	1	1	1	0	1	1	0	0	0	0	1	1	0	0	0	0	1	1	0	0	0	20.6	20.6	20.6	13.952	126	126	0.00073855	2.2494		By MS/MS	By MS/MS				0	20.6	20.6	0	0	0
O60934	O60934	1	1	1	Nibrin	NBN	Nibrin OS=Homo sapiens GN=NBN PE=1 SV=1	1	1	1	1	0	0	0	0	1	0	0	0	0	0	1	0	0	0	0	0	1	0	2.3	2.3	2.3	84.958	754	754	0.0078023	1.5158					By MS/MS		0	0	0	0	2.3	0
O75027-3;O75027;O75027-2	O75027-3;O75027;O75027-2	1;1;1	1;1;1	1;1;1	ATP-binding cassette sub-family B member 7, mitochondrial	ABCB7	Isoform 3 of ATP-binding cassette sub-family B member 7, mitochondrial OS=Homo sapiens GN=ABCB7;ATP-binding cassette sub-family B member 7, mitochondrial OS=Homo sapiens GN=ABCB7 PE=1 SV=2;Isoform 2 of ATP-binding cassette sub-family B member 7, mitochondr	3	1	1	1	0	0	1	1	1	0	0	0	1	1	1	0	0	0	1	1	1	0	1.4	1.4	1.4	78.159	712	712;752;753	0.00074963	2.3079			By matching	By MS/MS	By MS/MS		0	0	1.4	1.4	1.4	0
O75096	O75096	2	2	2	Low-density lipoprotein receptor-related protein 4	LRP4	Low-density lipoprotein receptor-related protein 4 OS=Homo sapiens GN=LRP4 PE=1 SV=4	1	2	2	2	0	0	0	2	2	0	0	0	0	2	2	0	0	0	0	2	2	0	1.2	1.2	1.2	212.04	1905	1905	0.0046948	1.683				By MS/MS	By MS/MS		0	0	0	1.2	1.2	0
O75131	O75131	2	2	2	Copine-3	CPNE3	Copine-3 OS=Homo sapiens GN=CPNE3 PE=1 SV=1	1	2	2	2	2	2	2	1	1	2	2	2	2	1	1	2	2	2	2	1	1	2	3.9	3.9	3.9	60.13	537	537	0	5.0922	By MS/MS	By MS/MS	By MS/MS	By MS/MS	By MS/MS	By MS/MS	3.9	3.9	3.9	2.2	2.2	3.9
O75147-2;O75147-1;O75147-4;O75147	O75147-2;O75147-1;O75147-4;O75147	1;1;1;1	1;1;1;1	1;1;1;1	Obscurin-like protein 1	OBSL1	Isoform 2 of Obscurin-like protein 1 OS=Homo sapiens GN=OBSL1;Isoform 3 of Obscurin-like protein 1 OS=Homo sapiens GN=OBSL1;Isoform 4 of Obscurin-like protein 1 OS=Homo sapiens GN=OBSL1;Obscurin-like protein 1 OS=Homo sapiens GN=OBSL1 PE=1 SV=4	4	1	1	1	0	0	0	1	0	0	0	0	0	1	0	0	0	0	0	1	0	0	1.8	1.8	1.8	113.27	1025	1025;1401;1543;1896	0	3.825				By MS/MS			0	0	0	1.8	0	0
O75151;Q9UPP1-5;Q9UPP1-4;Q9UPP1-3;Q9UPP1-2;Q9UPP1	O75151	3;1;1;1;1;1	3;1;1;1;1;1	3;1;1;1;1;1	Lysine-specific demethylase PHF2	PHF2	Lysine-specific demethylase PHF2 OS=Homo sapiens GN=PHF2 PE=1 SV=4	6	3	3	3	1	3	3	1	2	2	1	3	3	1	2	2	1	3	3	1	2	2	3.5	3.5	3.5	120.77	1096	1096;878;948;959;1024;1060	0	37.37	By MS/MS	By MS/MS	By MS/MS	By matching	By matching	By MS/MS	0.9	3.5	3.5	1.3	2.6	2.2
O75165	O75165	4	4	4	DnaJ homolog subfamily C member 13	DNAJC13	DnaJ homolog subfamily C member 13 OS=Homo sapiens GN=DNAJC13 PE=1 SV=5	1	4	4	4	0	0	0	4	4	0	0	0	0	4	4	0	0	0	0	4	4	0	2.3	2.3	2.3	254.41	2243	2243	0	82.358				By MS/MS	By MS/MS		0	0	0	2.3	2.3	0
O75179-5;O75179-3;O75179-4;O75179-6;O75179-7;O75179-2;O75179	O75179-5;O75179-3;O75179-4;O75179-6;O75179-7;O75179-2;O75179	1;1;1;1;1;1;1	1;1;1;1;1;1;1	1;1;1;1;1;1;1	Ankyrin repeat domain-containing protein 17	ANKRD17	Isoform 5 of Ankyrin repeat domain-containing protein 17 OS=Homo sapiens GN=ANKRD17;Isoform 3 of Ankyrin repeat domain-containing protein 17 OS=Homo sapiens GN=ANKRD17;Isoform 4 of Ankyrin repeat domain-containing protein 17 OS=Homo sapiens GN=ANKRD17;Isof	7	1	1	1	1	0	1	1	1	0	1	0	1	1	1	0	1	0	1	1	1	0	2	2	2	77.824	751	751;1187;2010;2352;2490;2602;2603	0	18.755	By matching		By matching	By MS/MS	By MS/MS		2	0	2	2	2	0
O75326-2;O75326	O75326-2;O75326	2;2	2;2	2;2	Semaphorin-7A	SEMA7A	Isoform 2 of Semaphorin-7A OS=Homo sapiens GN=SEMA7A;Semaphorin-7A OS=Homo sapiens GN=SEMA7A PE=1 SV=1	2	2	2	2	0	0	0	2	2	0	0	0	0	2	2	0	0	0	0	2	2	0	3.8	3.8	3.8	73.363	652	652;666	0	28.231				By MS/MS	By MS/MS		0	0	0	3.8	3.8	0
O75367-2;O75367-3;O75367;Q9P0M6	O75367-2;O75367-3;O75367	9;9;9;1	9;9;9;1	9;9;9;1	Core histone macro-H2A.1	H2AFY	Isoform 1 of Core histone macro-H2A.1 OS=Homo sapiens GN=H2AFY;Isoform 3 of Core histone macro-H2A.1 OS=Homo sapiens GN=H2AFY;Core histone macro-H2A.1 OS=Homo sapiens GN=H2AFY PE=1 SV=4	4	9	9	9	5	6	6	3	3	8	5	6	6	3	3	8	5	6	6	3	3	8	20.3	20.3	20.3	39.183	369	369;371;372;372	0	42.353	By MS/MS	By MS/MS	By MS/MS	By MS/MS	By MS/MS	By MS/MS	14.6	17.1	17.1	11.4	11.7	17.3
O75369-7;O75369-6;O75369-3;O75369-2;O75369-9;O75369;O75369-8	O75369-7;O75369-6;O75369-3;O75369-2;O75369-9;O75369;O75369-8	1;1;1;1;1;1;1	1;1;1;1;1;1;1	1;1;1;1;1;1;1	Filamin-B	FLNB	Isoform 7 of Filamin-B OS=Homo sapiens GN=FLNB;Isoform 6 of Filamin-B OS=Homo sapiens GN=FLNB;Isoform 3 of Filamin-B OS=Homo sapiens GN=FLNB;Isoform 2 of Filamin-B OS=Homo sapiens GN=FLNB;Isoform 9 of Filamin-B OS=Homo sapiens GN=FLNB;Filamin-B OS=Homo sap	7	1	1	1	0	0	0	1	1	0	0	0	0	1	1	0	0	0	0	1	1	0	0.5	0.5	0.5	257.55	2422	2422;2537;2561;2578;2591;2602;2633	0.0014085	1.9712				By MS/MS	By MS/MS		0	0	0	0.5	0.5	0
O75396	O75396	2	2	2	Vesicle-trafficking protein SEC22b	SEC22B	Vesicle-trafficking protein SEC22b OS=Homo sapiens GN=SEC22B PE=1 SV=4	1	2	2	2	0	1	0	2	2	0	0	1	0	2	2	0	0	1	0	2	2	0	9.3	9.3	9.3	24.593	215	215	0	3.6291		By matching		By MS/MS	By MS/MS		0	4.7	0	9.3	9.3	0
O75400;O75400-3;O75400-2	O75400;O75400-3;O75400-2	14;14;13	14;14;13	14;14;13	Pre-mRNA-processing factor 40 homolog A	PRPF40A	Pre-mRNA-processing factor 40 homolog A OS=Homo sapiens GN=PRPF40A PE=1 SV=2;Isoform 3 of Pre-mRNA-processing factor 40 homolog A OS=Homo sapiens GN=PRPF40A;Isoform 2 of Pre-mRNA-processing factor 40 homolog A OS=Homo sapiens GN=PRPF40A	3	14	14	14	10	9	8	8	8	10	10	9	8	8	8	10	10	9	8	8	8	10	15.6	15.6	15.6	108.8	957	957;939;930	0	182.98	By MS/MS	By MS/MS	By MS/MS	By MS/MS	By MS/MS	By MS/MS	12.2	10	9.1	9.1	9.1	10.6
O75436-2;O75436	O75436-2;O75436	1;1	1;1	1;1	Vacuolar protein sorting-associated protein 26A	VPS26A	Isoform 2 of Vacuolar protein sorting-associated protein 26A OS=Homo sapiens GN=VPS26A;Vacuolar protein sorting-associated protein 26A OS=Homo sapiens GN=VPS26A PE=1 SV=2	2	1	1	1	0	0	0	0	1	0	0	0	0	0	1	0	0	0	0	0	1	0	7.2	7.2	7.2	28.938	251	251;327	0	2.3695					By MS/MS		0	0	0	0	7.2	0
O75438;O75438-2	O75438;O75438-2	1;1	1;1	1;1	NADH dehydrogenase [ubiquinone] 1 beta subcomplex subunit 1	NDUFB1	NADH dehydrogenase [ubiquinone] 1 beta subcomplex subunit 1 OS=Homo sapiens GN=NDUFB1 PE=1 SV=1;Isoform 2 of NADH dehydrogenase [ubiquinone] 1 beta subcomplex subunit 1 OS=Homo sapiens GN=NDUFB1	2	1	1	1	0	0	0	1	1	0	0	0	0	1	1	0	0	0	0	1	1	0	19	19	19	6.9611	58	58;105	0.0065488	1.5633				By MS/MS	By MS/MS		0	0	0	19	19	0
O75439	O75439	1	1	1	Mitochondrial-processing peptidase subunit beta	PMPCB	Mitochondrial-processing peptidase subunit beta OS=Homo sapiens GN=PMPCB PE=1 SV=2	1	1	1	1	0	0	0	1	1	0	0	0	0	1	1	0	0	0	0	1	1	0	2.2	2.2	2.2	54.366	489	489	0.0013947	1.8904				By MS/MS	By MS/MS		0	0	0	2.2	2.2	0
O75475;O75475-3;O75475-2	O75475;O75475-3;O75475-2	24;18;18	24;18;18	24;18;18	PC4 and SFRS1-interacting protein	PSIP1	PC4 and SFRS1-interacting protein OS=Homo sapiens GN=PSIP1 PE=1 SV=1;Isoform 3 of PC4 and SFRS1-interacting protein OS=Homo sapiens GN=PSIP1;Isoform 2 of PC4 and SFRS1-interacting protein OS=Homo sapiens GN=PSIP1	3	24	24	24	14	19	22	3	1	22	14	19	22	3	1	22	14	19	22	3	1	22	41.7	41.7	41.7	60.103	530	530;329;333	0	164.77	By MS/MS	By MS/MS	By MS/MS	By matching	By matching	By MS/MS	30.8	38.3	39.1	6.4	1.7	40
O75477;O94905-2;O94905-3	O75477	4;1;1	4;1;1	2;0;0	Erlin-1	ERLIN1	Erlin-1 OS=Homo sapiens GN=ERLIN1 PE=1 SV=1	3	4	4	2	0	1	0	4	4	0	0	1	0	4	4	0	0	0	0	2	2	0	15.3	15.3	9	38.925	346	346;152;206	0	21.52		By matching		By MS/MS	By MS/MS		0	3.5	0	15.3	15.3	0
O75494-5;O75494-4;O75494-6;O75494-3;O75494-2;O75494;Q8WXF0	O75494-5;O75494-4;O75494-6;O75494-3;O75494-2;O75494;Q8WXF0	2;2;2;2;2;2;1	2;2;2;2;2;2;1	2;2;2;2;2;2;1	Serine/arginine-rich splicing factor 10;Serine/arginine-rich splicing factor 12	SRSF10;SRSF12	Isoform 5 of Serine/arginine-rich splicing factor 10 OS=Homo sapiens GN=SRSF10;Isoform 4 of Serine/arginine-rich splicing factor 10 OS=Homo sapiens GN=SRSF10;Isoform 6 of Serine/arginine-rich splicing factor 10 OS=Homo sapiens GN=SRSF10;Isoform 3 of Serine	7	2	2	2	1	0	0	0	0	2	1	0	0	0	0	2	1	0	0	0	0	2	13.3	13.3	13.3	20.117	165	165;173;182;183;261;262;261	0	2.7081	By MS/MS					By MS/MS	6.7	0	0	0	0	13.3
O75533	O75533	9	9	9	Splicing factor 3B subunit 1	SF3B1	Splicing factor 3B subunit 1 OS=Homo sapiens GN=SF3B1 PE=1 SV=3	1	9	9	9	2	4	3	9	8	2	2	4	3	9	8	2	2	4	3	9	8	2	6.9	6.9	6.9	145.83	1304	1304	0	66.299	By MS/MS	By MS/MS	By MS/MS	By MS/MS	By MS/MS	By matching	2.3	3.4	2.5	6.9	5.4	1.2
O75534-2;O75534;O75534-3;O75534-4	O75534-2;O75534;O75534-3;O75534-4	2;2;2;2	2;2;2;2	2;2;2;2	Cold shock domain-containing protein E1	CSDE1	Isoform 2 of Cold shock domain-containing protein E1 OS=Homo sapiens GN=CSDE1;Cold shock domain-containing protein E1 OS=Homo sapiens GN=CSDE1 PE=1 SV=2;Isoform 3 of Cold shock domain-containing protein E1 OS=Homo sapiens GN=CSDE1;Isoform 4 of Cold shock d	4	2	2	2	1	1	1	2	2	1	1	1	1	2	2	1	1	1	1	2	2	1	2.6	2.6	2.6	85.746	767	767;798;813;844	0	3.1445	By matching	By matching	By matching	By MS/MS	By MS/MS	By matching	1.2	1.4	1.4	2.6	2.6	1.2
O75592-2;O75592	O75592-2;O75592	3;3	3;3	3;3	E3 ubiquitin-protein ligase MYCBP2	MYCBP2	Isoform 2 of E3 ubiquitin-protein ligase MYCBP2 OS=Homo sapiens GN=MYCBP2;E3 ubiquitin-protein ligase MYCBP2 OS=Homo sapiens GN=MYCBP2 PE=1 SV=3	2	3	3	3	0	1	1	3	2	0	0	1	1	3	2	0	0	1	1	3	2	0	0.9	0.9	0.9	509.7	4637	4637;4640	0	22.193		By matching	By matching	By MS/MS	By MS/MS		0	0.3	0.3	0.9	0.6	0
O75643	O75643	1	1	1	U5 small nuclear ribonucleoprotein 200 kDa helicase	SNRNP200	U5 small nuclear ribonucleoprotein 200 kDa helicase OS=Homo sapiens GN=SNRNP200 PE=1 SV=2	1	1	1	1	0	0	0	1	1	1	0	0	0	1	1	1	0	0	0	1	1	1	0.5	0.5	0.5	244.5	2136	2136	0	2.9002				By MS/MS	By MS/MS	By matching	0	0	0	0.5	0.5	0.5
O75648-5;O75648-2;O75648	O75648-5;O75648-2;O75648	1;1;1	1;1;1	1;1;1	Mitochondrial tRNA-specific 2-thiouridylase 1	TRMU	Isoform 5 of Mitochondrial tRNA-specific 2-thiouridylase 1 OS=Homo sapiens GN=TRMU;Isoform 2 of Mitochondrial tRNA-specific 2-thiouridylase 1 OS=Homo sapiens GN=TRMU;Mitochondrial tRNA-specific 2-thiouridylase 1 OS=Homo sapiens GN=TRMU PE=1 SV=2	3	1	1	1	0	0	0	1	0	0	0	0	0	1	0	0	0	0	0	1	0	0	7.2	7.2	7.2	19.153	166	166;376;421	0	3.6418				By MS/MS			0	0	0	7.2	0	0
O75691	O75691	13	13	13	Small subunit processome component 20 homolog	UTP20	Small subunit processome component 20 homolog OS=Homo sapiens GN=UTP20 PE=1 SV=3	1	13	13	13	0	0	2	12	12	2	0	0	2	12	12	2	0	0	2	12	12	2	6	6	6	318.38	2785	2785	0	96.093			By MS/MS	By MS/MS	By MS/MS	By MS/MS	0	0	0.8	6	5.6	0.8
O75694-2;O75694	O75694-2;O75694	8;8	8;8	8;8	Nuclear pore complex protein Nup155	NUP155	Isoform 2 of Nuclear pore complex protein Nup155 OS=Homo sapiens GN=NUP155;Nuclear pore complex protein Nup155 OS=Homo sapiens GN=NUP155 PE=1 SV=1	2	8	8	8	0	0	0	8	8	0	0	0	0	8	8	0	0	0	0	8	8	0	7.7	7.7	7.7	149.01	1332	1332;1391	0	75.644				By MS/MS	By MS/MS		0	0	0	7.7	7.7	0
O75746-2;O75746	O75746-2;O75746	2;2	2;2	2;2	Calcium-binding mitochondrial carrier protein Aralar1	SLC25A12	Isoform 2 of Calcium-binding mitochondrial carrier protein Aralar1 OS=Homo sapiens GN=SLC25A12;Calcium-binding mitochondrial carrier protein Aralar1 OS=Homo sapiens GN=SLC25A12 PE=1 SV=2	2	2	2	2	1	0	0	2	2	0	1	0	0	2	2	0	1	0	0	2	2	0	3.9	3.9	3.9	62.72	571	571;678	0	5.6192	By MS/MS			By MS/MS	By MS/MS		1.8	0	0	3.9	3.9	0
O75821	O75821	2	2	2	Eukaryotic translation initiation factor 3 subunit G	EIF3G	Eukaryotic translation initiation factor 3 subunit G OS=Homo sapiens GN=EIF3G PE=1 SV=2	1	2	2	2	1	0	0	2	1	0	1	0	0	2	1	0	1	0	0	2	1	0	6.9	6.9	6.9	35.611	320	320	0	3.0644	By matching			By MS/MS	By MS/MS		2.8	0	0	6.9	2.8	0
P16152-2;P16152;O75828	P16152-2;P16152;O75828	1;1;1	1;1;1	1;1;1	Carbonyl reductase [NADPH] 1;Carbonyl reductase [NADPH] 3	CBR1;CBR3	Isoform 2 of Carbonyl reductase [NADPH] 1 OS=Homo sapiens GN=CBR1;Carbonyl reductase [NADPH] 1 OS=Homo sapiens GN=CBR1 PE=1 SV=3;Carbonyl reductase [NADPH] 3 OS=Homo sapiens GN=CBR3 PE=1 SV=3	3	1	1	1	0	0	0	1	1	0	0	0	0	1	1	0	0	0	0	1	1	0	9.2	9.2	9.2	18.762	173	173;277;277	0	11.12				By MS/MS	By MS/MS		0	0	0	9.2	9.2	0
O75844	O75844	1	1	1	CAAX prenyl protease 1 homolog	ZMPSTE24	CAAX prenyl protease 1 homolog OS=Homo sapiens GN=ZMPSTE24 PE=1 SV=2	1	1	1	1	0	0	1	1	1	0	0	0	1	1	1	0	0	0	1	1	1	0	2.7	2.7	2.7	54.812	475	475	0	44.888			By matching	By MS/MS	By MS/MS		0	0	2.7	2.7	2.7	0
O75940	O75940	2	2	2	Survival of motor neuron-related-splicing factor 30	SMNDC1	Survival of motor neuron-related-splicing factor 30 OS=Homo sapiens GN=SMNDC1 PE=1 SV=1	1	2	2	2	1	0	0	1	1	0	1	0	0	1	1	0	1	0	0	1	1	0	8.8	8.8	8.8	26.711	238	238	0	2.4276	By MS/MS			By MS/MS	By MS/MS		5	0	0	3.8	3.8	0
O75962-5;O75962-2;O75962-4;O75962	O75962-5;O75962-2;O75962-4;O75962	1;1;1;1	1;1;1;1	1;1;1;1	Triple functional domain protein	TRIO	Isoform 5 of Triple functional domain protein OS=Homo sapiens GN=TRIO;Isoform 2 of Triple functional domain protein OS=Homo sapiens GN=TRIO;Isoform 4 of Triple functional domain protein OS=Homo sapiens GN=TRIO;Triple functional domain protein OS=Homo sapie	4	1	1	1	0	0	0	0	1	0	0	0	0	0	1	0	0	0	0	0	1	0	1.8	1.8	1.8	287.37	2563	2563;2921;3038;3097	0	9.0403					By MS/MS		0	0	0	0	1.8	0
O75964	O75964	1	1	1	ATP synthase subunit g, mitochondrial	ATP5L	ATP synthase subunit g, mitochondrial OS=Homo sapiens GN=ATP5L PE=1 SV=3	1	1	1	1	0	0	0	1	1	0	0	0	0	1	1	0	0	0	0	1	1	0	12.6	12.6	12.6	11.428	103	103	0.0027192	1.7681				By MS/MS	By MS/MS		0	0	0	12.6	12.6	0
O76021;O76021-2	O76021;O76021-2	30;17	30;17	30;17	Ribosomal L1 domain-containing protein 1	RSL1D1	Ribosomal L1 domain-containing protein 1 OS=Homo sapiens GN=RSL1D1 PE=1 SV=3;Isoform 2 of Ribosomal L1 domain-containing protein 1 OS=Homo sapiens GN=RSL1D1	2	30	30	30	19	22	21	22	20	22	19	22	21	22	20	22	19	22	21	22	20	22	47.8	47.8	47.8	54.972	490	490;270	0	305.13	By MS/MS	By MS/MS	By MS/MS	By MS/MS	By MS/MS	By MS/MS	37.6	42.2	40.6	42.9	39.8	39.2
O76094-2;O76094	O76094-2;O76094	5;5	5;5	5;5	Signal recognition particle subunit SRP72	SRP72	Isoform 2 of Signal recognition particle subunit SRP72 OS=Homo sapiens GN=SRP72;Signal recognition particle subunit SRP72 OS=Homo sapiens GN=SRP72 PE=1 SV=3	2	5	5	5	2	3	4	3	4	3	2	3	4	3	4	3	2	3	4	3	4	3	9.7	9.7	9.7	67.879	610	610;671	0	90.608	By MS/MS	By MS/MS	By MS/MS	By MS/MS	By MS/MS	By MS/MS	4.4	6.1	7.5	6.6	8.2	6.1
O94776;O94776-2	O94776;O94776-2	3;2	3;2	3;2	Metastasis-associated protein MTA2	MTA2	Metastasis-associated protein MTA2 OS=Homo sapiens GN=MTA2 PE=1 SV=1;Isoform 2 of Metastasis-associated protein MTA2 OS=Homo sapiens GN=MTA2	2	3	3	3	1	3	2	3	3	3	1	3	2	3	3	3	1	3	2	3	3	3	5.5	5.5	5.5	75.022	668	668;495	0	64.656	By matching	By MS/MS	By MS/MS	By MS/MS	By MS/MS	By MS/MS	1.5	5.5	3.1	5.5	5.5	5.5
O94829	O94829	1	1	1	Importin-13	IPO13	Importin-13 OS=Homo sapiens GN=IPO13 PE=1 SV=3	1	1	1	1	0	0	0	0	1	0	0	0	0	0	1	0	0	0	0	0	1	0	1.5	1.5	1.5	108.19	963	963	0	2.4061					By MS/MS		0	0	0	0	1.5	0
O94851-2;O94851-5;O94851-6;O94851-4;O94851-3;O94851	O94851-2;O94851-5;O94851-6;O94851-4;O94851-3;O94851	5;5;5;5;5;5	5;5;5;5;5;5	5;5;5;5;5;5	Protein-methionine sulfoxide oxidase MICAL2	MICAL2	Isoform 2 of [F-actin]-monooxygenase MICAL2 OS=Homo sapiens GN=MICAL2;Isoform 5 of [F-actin]-monooxygenase MICAL2 OS=Homo sapiens GN=MICAL2;Isoform 6 of [F-actin]-monooxygenase MICAL2 OS=Homo sapiens GN=MICAL2;Isoform 4 of [F-actin]-monooxygenase MICAL2 OS	6	5	5	5	0	2	1	5	5	2	0	2	1	5	5	2	0	2	1	5	5	2	8.5	8.5	8.5	89.889	784	784;934;955;976;1103;1124	0	25.116		By matching	By matching	By MS/MS	By MS/MS	By matching	0	3.2	1.5	8.5	8.5	3.2
O94880;O94880-2	O94880	4;1	4;1	4;1	PHD finger protein 14	PHF14	PHD finger protein 14 OS=Homo sapiens GN=PHF14 PE=1 SV=2	2	4	4	4	2	3	2	0	0	3	2	3	2	0	0	3	2	3	2	0	0	3	5.7	5.7	5.7	100.05	888	888;663	0	12.811	By MS/MS	By MS/MS	By MS/MS			By MS/MS	2.5	3.6	2.3	0	0	4.4
O94901-2;O94901-7;O94901-3;O94901-5;O94901-8;O94901;O94901-9;O94901-4;O94901-6	O94901-2;O94901-7;O94901-3;O94901-5;O94901-8;O94901;O94901-9;O94901-4;O94901-6	2;2;2;2;2;2;2;1;1	2;2;2;2;2;2;2;1;1	2;2;2;2;2;2;2;1;1	SUN domain-containing protein 1	SUN1	Isoform 2 of SUN domain-containing protein 1 OS=Homo sapiens GN=SUN1;Isoform 7 of SUN domain-containing protein 1 OS=Homo sapiens GN=SUN1;Isoform 3 of SUN domain-containing protein 1 OS=Homo sapiens GN=SUN1;Isoform 5 of SUN domain-containing protein 1 OS=H	9	2	2	2	0	0	0	1	1	0	0	0	0	1	1	0	0	0	0	1	1	0	16.3	16.3	16.3	28.083	257	257;278;341;702;785;812;916;109;682	0	10.203				By MS/MS	By MS/MS		0	0	0	10.5	5.8	0
O94905	O94905	3	1	1	Erlin-2	ERLIN2	Erlin-2 OS=Homo sapiens GN=ERLIN2 PE=1 SV=1	1	3	1	1	0	1	0	3	3	0	0	0	0	1	1	0	0	0	0	1	1	0	9.7	3.2	3.2	37.839	339	339	0.00075188	2.318		By matching		By MS/MS	By MS/MS		0	3.5	0	9.7	9.7	0
O94906-2;O94906	O94906-2;O94906	11;11	11;11	11;11	Pre-mRNA-processing factor 6	PRPF6	Isoform 2 of Pre-mRNA-processing factor 6 OS=Homo sapiens GN=PRPF6;Pre-mRNA-processing factor 6 OS=Homo sapiens GN=PRPF6 PE=1 SV=1	2	11	11	11	1	1	0	8	11	1	1	1	0	8	11	1	1	1	0	8	11	1	13.9	13.9	13.9	102.43	901	901;941	0	59.028	By matching	By matching		By MS/MS	By MS/MS	By matching	0.9	0.9	0	10.2	13.9	0.9
O94913	O94913	14	14	14	Pre-mRNA cleavage complex 2 protein Pcf11	PCF11	Pre-mRNA cleavage complex 2 protein Pcf11 OS=Homo sapiens GN=PCF11 PE=1 SV=3	1	14	14	14	9	5	8	0	0	11	9	5	8	0	0	11	9	5	8	0	0	11	9.1	9.1	9.1	173.05	1555	1555	0	39.835	By MS/MS	By MS/MS	By MS/MS			By MS/MS	5.7	4.2	6	0	0	7.7
O94915	O94915	2	2	2	Protein furry homolog-like	FRYL	Protein furry homolog-like OS=Homo sapiens GN=FRYL PE=1 SV=2	1	2	2	2	0	0	0	2	2	0	0	0	0	2	2	0	0	0	0	2	2	0	1.2	1.2	1.2	339.59	3013	3013	0	56.878				By MS/MS	By MS/MS		0	0	0	1.2	1.2	0
O94915-2	O94915-2	1	1	1	Protein furry homolog-like	FRYL	Isoform 2 of Protein furry homolog-like OS=Homo sapiens GN=FRYL	1	1	1	1	0	0	0	0	1	0	0	0	0	0	1	0	0	0	0	0	1	0	3	3	3	45.597	403	403	0	3.1768					By MS/MS		0	0	0	0	3	0
O94929-2;O94929-3;O94929;O94929-4	O94929-2;O94929-3;O94929	3;3;3;1	3;3;3;1	3;3;3;1	Actin-binding LIM protein 3	ABLIM3	Isoform 2 of Actin-binding LIM protein 3 OS=Homo sapiens GN=ABLIM3;Isoform 3 of Actin-binding LIM protein 3 OS=Homo sapiens GN=ABLIM3;Actin-binding LIM protein 3 OS=Homo sapiens GN=ABLIM3 PE=1 SV=3	4	3	3	3	2	2	3	0	1	3	2	2	3	0	1	3	2	2	3	0	1	3	8.3	8.3	8.3	61.57	544	544;588;683;169	0	7.6243	By MS/MS	By MS/MS	By MS/MS		By MS/MS	By MS/MS	5	6.1	8.3	0	2.2	8.3
O94953-2;O94953	O94953-2;O94953	1;1	1;1	1;1	Lysine-specific demethylase 4B	KDM4B	Isoform 2 of Lysine-specific demethylase 4B OS=Homo sapiens GN=KDM4B;Lysine-specific demethylase 4B OS=Homo sapiens GN=KDM4B PE=1 SV=4	2	1	1	1	0	0	0	1	1	0	0	0	0	1	1	0	0	0	0	1	1	0	2.9	2.9	2.9	50.581	448	448;1096	0	2.8979				By MS/MS	By MS/MS		0	0	0	2.9	2.9	0
O94955	O94955	1	1	1	Rho-related BTB domain-containing protein 3	RHOBTB3	Rho-related BTB domain-containing protein 3 OS=Homo sapiens GN=RHOBTB3 PE=1 SV=2	1	1	1	1	0	0	0	1	1	0	0	0	0	1	1	0	0	0	0	1	1	0	2.6	2.6	2.6	69.413	611	611	0	3.6143				By MS/MS	By MS/MS		0	0	0	2.6	2.6	0
O94966-2;O94966-7;O94966-6;O94966-5	O94966-2;O94966-7;O94966-6;O94966-5	1;1;1;1	1;1;1;1	1;1;1;1			Isoform 2 of Ubiquitin carboxyl-terminal hydrolase 19 OS=Homo sapiens GN=USP19;Isoform 7 of Ubiquitin carboxyl-terminal hydrolase 19 OS=Homo sapiens GN=USP19;Isoform 6 of Ubiquitin carboxyl-terminal hydrolase 19 OS=Homo sapiens GN=USP19;Isoform 5 of Ubiqui	4	1	1	1	0	0	0	1	1	0	0	0	0	1	1	0	0	0	0	1	1	0	2.7	2.7	2.7	71.089	660	660;1372;1384;1419	0	3.8855				By matching	By MS/MS		0	0	0	2.7	2.7	0
O94967-2;O94967;O94967-3;O94967-4	O94967-2;O94967;O94967-3;O94967-4	1;1;1;1	1;1;1;1	1;1;1;1	WD repeat-containing protein 47	WDR47	Isoform 2 of WD repeat-containing protein 47 OS=Homo sapiens GN=WDR47;WD repeat-containing protein 47 OS=Homo sapiens GN=WDR47 PE=1 SV=1;Isoform 3 of WD repeat-containing protein 47 OS=Homo sapiens GN=WDR47;Isoform 4 of WD repeat-containing protein 47 OS=H	4	1	1	1	1	0	0	0	0	0	1	0	0	0	0	0	1	0	0	0	0	0	1.1	1.1	1.1	98.515	891	891;919;920;927	1	-2	By MS/MS						1.1	0	0	0	0	0
O94979-3;O94979-9;O94979-2;O94979;O94979-8;O94979-5;O94979-7;O94979-6;O94979-10;O94979-4	O94979-3;O94979-9;O94979-2;O94979;O94979-8;O94979-5;O94979-7;O94979-6;O94979-10;O94979-4	2;2;2;2;2;1;1;1;1;1	2;2;2;2;2;1;1;1;1;1	2;2;2;2;2;1;1;1;1;1	Protein transport protein Sec31A	SEC31A	Isoform 3 of Protein transport protein Sec31A OS=Homo sapiens GN=SEC31A;Isoform 9 of Protein transport protein Sec31A OS=Homo sapiens GN=SEC31A;Isoform 2 of Protein transport protein Sec31A OS=Homo sapiens GN=SEC31A;Protein transport protein Sec31A OS=Homo	10	2	2	2	2	1	1	0	0	1	2	1	1	0	0	1	2	1	1	0	0	1	1.7	1.7	1.7	121.65	1106	1106;1200;1205;1220;1233;509;969;1067;1166;1181	0.0014094	1.9722	By MS/MS	By matching	By MS/MS			By MS/MS	1.7	0.9	0.9	0	0	0.9
O95084-2;O95084	O95084-2;O95084	1;1	1;1	1;1	Serine protease 23	PRSS23	Isoform 2 of Serine protease 23 OS=Homo sapiens GN=PRSS23;Serine protease 23 OS=Homo sapiens GN=PRSS23 PE=1 SV=1	2	1	1	1	0	0	1	1	1	0	0	0	1	1	1	0	0	0	1	1	1	0	3.7	3.7	3.7	39.641	351	351;383	0.0014368	2.0947			By matching	By MS/MS	By MS/MS		0	0	3.7	3.7	3.7	0
O95155-2;O95155;O95155-4	O95155-2;O95155;O95155-4	2;2;2	2;2;2	2;2;2	Ubiquitin conjugation factor E4 B	UBE4B	Isoform 2 of Ubiquitin conjugation factor E4 B OS=Homo sapiens GN=UBE4B;Ubiquitin conjugation factor E4 B OS=Homo sapiens GN=UBE4B PE=1 SV=1;Isoform 4 of Ubiquitin conjugation factor E4 B OS=Homo sapiens GN=UBE4B	3	2	2	2	0	0	0	2	2	0	0	0	0	2	2	0	0	0	0	2	2	0	2.6	2.6	2.6	133.27	1173	1173;1302;1353	0	34.339				By MS/MS	By MS/MS		0	0	0	2.6	2.6	0
O95202	O95202	1	1	1	LETM1 and EF-hand domain-containing protein 1, mitochondrial	LETM1	Mitochondrial proton/calcium exchanger protein OS=Homo sapiens GN=LETM1 PE=1 SV=1	1	1	1	1	0	0	0	1	1	0	0	0	0	1	1	0	0	0	0	1	1	0	1.6	1.6	1.6	83.353	739	739	0	3.8644				By MS/MS	By MS/MS		0	0	0	1.6	1.6	0
O95218-2;O95218	O95218-2;O95218	9;9	9;9	9;9	Zinc finger Ran-binding domain-containing protein 2	ZRANB2	Isoform 2 of Zinc finger Ran-binding domain-containing protein 2 OS=Homo sapiens GN=ZRANB2;Zinc finger Ran-binding domain-containing protein 2 OS=Homo sapiens GN=ZRANB2 PE=1 SV=2	2	9	9	9	6	7	4	1	1	8	6	7	4	1	1	8	6	7	4	1	1	8	25.9	25.9	25.9	36.318	320	320;330	0	28.079	By MS/MS	By MS/MS	By MS/MS	By MS/MS	By matching	By MS/MS	15.6	18.4	11.6	3.1	3.1	23.1
O95232	O95232	9	9	9	Luc7-like protein 3	LUC7L3	Luc7-like protein 3 OS=Homo sapiens GN=LUC7L3 PE=1 SV=2	1	9	9	9	6	7	7	3	1	9	6	7	7	3	1	9	6	7	7	3	1	9	19.9	19.9	19.9	51.466	432	432	0	153.75	By MS/MS	By MS/MS	By MS/MS	By MS/MS	By matching	By MS/MS	16	17.8	17.8	9.3	4.2	19.9
O95251-3;O95251-5;O95251-2;O95251-4;O95251	O95251-3;O95251-5;O95251-2;O95251-4;O95251	1;1;1;1;1	1;1;1;1;1	1;1;1;1;1	Histone acetyltransferase KAT7	KAT7	Isoform 3 of Histone acetyltransferase KAT7 OS=Homo sapiens GN=KAT7;Isoform 5 of Histone acetyltransferase KAT7 OS=Homo sapiens GN=KAT7;Isoform 2 of Histone acetyltransferase KAT7 OS=Homo sapiens GN=KAT7;Isoform 4 of Histone acetyltransferase KAT7 OS=Homo	5	1	1	1	0	0	0	0	1	0	0	0	0	0	1	0	0	0	0	0	1	0	2.9	2.9	2.9	51.439	442	442;472;501;581;611	0	2.836					By MS/MS		0	0	0	0	2.9	0
O95340;O95340-2	O95340;O95340-2	2;2	2;2	2;2	Bifunctional 3-phosphoadenosine 5-phosphosulfate synthase 2;Sulfate adenylyltransferase;Adenylyl-sulfate kinase	PAPSS2	Bifunctional 3-phosphoadenosine 5-phosphosulfate synthase 2 OS=Homo sapiens GN=PAPSS2 PE=1 SV=2;Isoform B of Bifunctional 3-phosphoadenosine 5-phosphosulfate synthase 2 OS=Homo sapiens GN=PAPSS2	2	2	2	2	0	0	0	2	2	0	0	0	0	2	2	0	0	0	0	2	2	0	3.7	3.7	3.7	69.5	614	614;619	0	3.2544				By MS/MS	By MS/MS		0	0	0	3.7	3.7	0
O95347-2;O95347	O95347-2;O95347	4;4	4;4	4;4	Structural maintenance of chromosomes protein 2	SMC2	Isoform 2 of Structural maintenance of chromosomes protein 2 OS=Homo sapiens GN=SMC2;Structural maintenance of chromosomes protein 2 OS=Homo sapiens GN=SMC2 PE=1 SV=2	2	4	4	4	1	1	1	4	4	1	1	1	1	4	4	1	1	1	1	4	4	1	4.1	4.1	4.1	124.92	1099	1099;1197	0	52.36	By MS/MS	By MS/MS	By matching	By MS/MS	By MS/MS	By matching	1	1	1	4.1	4.1	0.9
O95373	O95373	2	2	2	Importin-7	IPO7	Importin-7 OS=Homo sapiens GN=IPO7 PE=1 SV=1	1	2	2	2	0	0	0	2	2	0	0	0	0	2	2	0	0	0	0	2	2	0	2.8	2.8	2.8	119.52	1038	1038	0	26.748				By MS/MS	By MS/MS		0	0	0	2.8	2.8	0
O95391	O95391	8	8	8	Pre-mRNA-splicing factor SLU7	SLU7	Pre-mRNA-splicing factor SLU7 OS=Homo sapiens GN=SLU7 PE=1 SV=2	1	8	8	8	6	6	6	0	0	8	6	6	6	0	0	8	6	6	6	0	0	8	15.9	15.9	15.9	68.386	586	586	0	34.553	By MS/MS	By MS/MS	By MS/MS			By MS/MS	12.6	12.5	12.6	0	0	15.9
O95396	O95396	2	2	2	Adenylyltransferase and sulfurtransferase MOCS3;Molybdopterin-synthase adenylyltransferase;Molybdopterin-synthase sulfurtransferase	MOCS3	Adenylyltransferase and sulfurtransferase MOCS3 OS=Homo sapiens GN=MOCS3 PE=1 SV=1	1	2	2	2	0	0	0	2	1	0	0	0	0	2	1	0	0	0	0	2	1	0	6.3	6.3	6.3	49.669	460	460	0	3.1855				By MS/MS	By MS/MS		0	0	0	6.3	3.3	0
O95487-2;O95487;O95487-3	O95487-2;O95487;O95487-3	2;2;2	2;2;2	2;2;2	Protein transport protein Sec24B	SEC24B	Isoform 2 of Protein transport protein Sec24B OS=Homo sapiens GN=SEC24B;Protein transport protein Sec24B OS=Homo sapiens GN=SEC24B PE=1 SV=2;Isoform 3 of Protein transport protein Sec24B OS=Homo sapiens GN=SEC24B	3	2	2	2	1	1	1	2	1	1	1	1	1	2	1	1	1	1	1	2	1	1	2.7	2.7	2.7	133.63	1233	1233;1268;1298	0	4.7789	By MS/MS	By matching	By matching	By MS/MS	By MS/MS	By MS/MS	1.1	1.1	1.1	2.7	1.1	1.1
O95573	O95573	4	4	4	Long-chain-fatty-acid--CoA ligase 3	ACSL3	Long-chain-fatty-acid--CoA ligase 3 OS=Homo sapiens GN=ACSL3 PE=1 SV=3	1	4	4	4	0	1	0	4	4	0	0	1	0	4	4	0	0	1	0	4	4	0	7.1	7.1	7.1	80.419	720	720	0	35.866		By matching		By MS/MS	By MS/MS		0	1.9	0	7.1	7.1	0
O95602	O95602	5	5	5	DNA-directed RNA polymerase I subunit RPA1	POLR1A	DNA-directed RNA polymerase I subunit RPA1 OS=Homo sapiens GN=POLR1A PE=1 SV=2	1	5	5	5	0	0	0	4	4	0	0	0	0	4	4	0	0	0	0	4	4	0	3.5	3.5	3.5	194.81	1720	1720	0	6.866				By MS/MS	By MS/MS		0	0	0	2.8	2.6	0
O95707	O95707	1	1	1	Ribonuclease P protein subunit p29	POP4	Ribonuclease P protein subunit p29 OS=Homo sapiens GN=POP4 PE=1 SV=2	1	1	1	1	0	0	0	1	1	0	0	0	0	1	1	0	0	0	0	1	1	0	6.4	6.4	6.4	25.424	220	220	0	46.389				By MS/MS	By MS/MS		0	0	0	6.4	6.4	0
O95714	O95714	4	4	4	E3 ubiquitin-protein ligase HERC2	HERC2	E3 ubiquitin-protein ligase HERC2 OS=Homo sapiens GN=HERC2 PE=1 SV=2	1	4	4	4	0	0	1	4	4	0	0	0	1	4	4	0	0	0	1	4	4	0	1.2	1.2	1.2	527.22	4834	4834	0	38.915			By matching	By MS/MS	By MS/MS		0	0	0.3	1.2	1.2	0
O95782-2;O95782;O94973-3;O94973;O94973-2	O95782-2;O95782	3;3;1;1;1	3;3;1;1;1	3;3;1;1;1	AP-2 complex subunit alpha-1	AP2A1	Isoform B of AP-2 complex subunit alpha-1 OS=Homo sapiens GN=AP2A1;AP-2 complex subunit alpha-1 OS=Homo sapiens GN=AP2A1 PE=1 SV=3	5	3	3	3	0	0	0	3	3	0	0	0	0	3	3	0	0	0	0	3	3	0	3.6	3.6	3.6	105.36	955	955;977;656;939;940	0	6.8264				By MS/MS	By MS/MS		0	0	0	3.6	3.6	0
O95786-2;O95786	O95786-2;O95786	1;1	1;1	1;1	Probable ATP-dependent RNA helicase DDX58	DDX58	Isoform 2 of Probable ATP-dependent RNA helicase DDX58 OS=Homo sapiens GN=DDX58;Probable ATP-dependent RNA helicase DDX58 OS=Homo sapiens GN=DDX58 PE=1 SV=2	2	1	1	1	0	0	0	1	1	0	0	0	0	1	1	0	0	0	0	1	1	0	1.2	1.2	1.2	101.38	880	880;925	0	3.1601				By MS/MS	By MS/MS		0	0	0	1.2	1.2	0
O95793-2;O95793-3;O95793	O95793-2;O95793-3;O95793	1;1;1	1;1;1	1;1;1	Double-stranded RNA-binding protein Staufen homolog 1	STAU1	Isoform Short of Double-stranded RNA-binding protein Staufen homolog 1 OS=Homo sapiens GN=STAU1;Isoform 3 of Double-stranded RNA-binding protein Staufen homolog 1 OS=Homo sapiens GN=STAU1;Double-stranded RNA-binding protein Staufen homolog 1 OS=Homo sapien	3	1	1	1	1	0	0	1	1	1	1	0	0	1	1	1	1	0	0	1	1	1	2.6	2.6	2.6	54.933	496	496;502;577	0.0014194	2.0123	By MS/MS			By MS/MS	By MS/MS	By matching	2.6	0	0	2.6	2.6	2.6
O95819-4;O95819-2;O95819;O95819-5;O95819-6;O95819-3;Q9UKE5-8;Q9UKE5-5;Q9UKE5-7;Q9UKE5-3;Q9UKE5-6;Q9UKE5-2;Q9UKE5-4;Q9UKE5	O95819-4;O95819-2;O95819;O95819-5;O95819-6;O95819-3	9;9;9;9;9;9;2;2;2;2;2;2;2;2	9;9;9;9;9;9;2;2;2;2;2;2;2;2	7;7;7;7;7;7;0;0;0;0;0;0;0;0	Mitogen-activated protein kinase kinase kinase kinase 4	MAP4K4	Isoform 4 of Mitogen-activated protein kinase kinase kinase kinase 4 OS=Homo sapiens GN=MAP4K4;Isoform 2 of Mitogen-activated protein kinase kinase kinase kinase 4 OS=Homo sapiens GN=MAP4K4;Mitogen-activated protein kinase kinase kinase kinase 4 OS=Homo sa	14	9	9	7	1	2	3	8	7	3	1	2	3	8	7	3	1	2	2	6	5	3	9.4	9.4	7.6	133.4	1165	1165;1212;1239;1242;1273;1320;1268;1276;1297;1305;1323;1331;1352;1360	0	149.81	By MS/MS	By MS/MS	By MS/MS	By MS/MS	By MS/MS	By MS/MS	1.5	3.9	4.6	8.4	7.6	5
O96000-2;O96000	O96000-2;O96000	1;1	1;1	1;1	NADH dehydrogenase [ubiquinone] 1 beta subcomplex subunit 10	NDUFB10	Isoform 2 of NADH dehydrogenase [ubiquinone] 1 beta subcomplex subunit 10 OS=Homo sapiens GN=NDUFB10;NADH dehydrogenase [ubiquinone] 1 beta subcomplex subunit 10 OS=Homo sapiens GN=NDUFB10 PE=1 SV=3	2	1	1	1	0	0	0	1	0	0	0	0	0	1	0	0	0	0	0	1	0	0	6	6	6	20.143	168	168;172	0.0014316	2.0485				By MS/MS			0	0	0	6	0	0
O96008-2;O96008	O96008-2;O96008	1;1	1;1	1;1	Mitochondrial import receptor subunit TOM40 homolog	TOMM40	Isoform 2 of Mitochondrial import receptor subunit TOM40 homolog OS=Homo sapiens GN=TOMM40;Mitochondrial import receptor subunit TOM40 homolog OS=Homo sapiens GN=TOMM40 PE=1 SV=1	2	1	1	1	0	0	0	1	1	0	0	0	0	1	1	0	0	0	0	1	1	0	9.7	9.7	9.7	34.441	329	329;361	0	5.5933				By MS/MS	By MS/MS		0	0	0	9.7	9.7	0
O96028-5;O96028-3;O96028;O96028-6;O96028-7	O96028-5;O96028-3;O96028;O96028-6	3;3;3;2;1	3;3;3;2;1	3;3;3;2;1	Histone-lysine N-methyltransferase NSD2	WHSC1	Isoform 5 of Histone-lysine N-methyltransferase NSD2 OS=Homo sapiens GN=NSD2;Isoform 3 of Histone-lysine N-methyltransferase NSD2 OS=Homo sapiens GN=NSD2;Histone-lysine N-methyltransferase NSD2 OS=Homo sapiens GN=NSD2 PE=1 SV=1;Isoform 6 of Histone-lysine	5	3	3	3	1	3	2	1	3	1	1	3	2	1	3	1	1	3	2	1	3	1	7.2	7.2	7.2	69.397	629	629;647;1365;484;273	0	7.6511	By MS/MS	By MS/MS	By MS/MS	By MS/MS	By MS/MS	By matching	2.4	7.2	4.6	2.4	7.2	2.4
P00338;P00338-3;P00338-4;P00338-5;P00338-2;Q6ZMR3;P07864	P00338;P00338-3;P00338-4;P00338-5;P00338-2	6;6;4;3;3;1;1	6;6;4;3;3;1;1	5;5;3;2;2;0;0	L-lactate dehydrogenase A chain	LDHA	L-lactate dehydrogenase A chain OS=Homo sapiens GN=LDHA PE=1 SV=2;Isoform 3 of L-lactate dehydrogenase A chain OS=Homo sapiens GN=LDHA;Isoform 4 of L-lactate dehydrogenase A chain OS=Homo sapiens GN=LDHA;Isoform 5 of L-lactate dehydrogenase A chain OS=Homo	7	6	6	5	2	2	3	5	5	2	2	2	3	5	5	2	2	1	2	4	4	1	17.2	17.2	13.6	36.688	332	332;361;274;241;274;332;332	0	33.824	By MS/MS	By matching	By MS/MS	By MS/MS	By MS/MS	By MS/MS	5.7	6.3	9.9	14.2	14.2	6.9
P00367-3;P00367;P00367-2;P49448	P00367-3;P00367;P00367-2;P49448	2;2;1;1	2;2;1;1	2;2;1;1	Glutamate dehydrogenase 1, mitochondrial;Glutamate dehydrogenase 2, mitochondrial	GLUD1;GLUD2	Isoform 3 of Glutamate dehydrogenase 1, mitochondrial OS=Homo sapiens GN=GLUD1;Glutamate dehydrogenase 1, mitochondrial OS=Homo sapiens GN=GLUD1 PE=1 SV=2;Isoform 2 of Glutamate dehydrogenase 1, mitochondrial OS=Homo sapiens GN=GLUD1;Glutamate dehydrogenas	4	2	2	2	0	1	0	2	2	0	0	1	0	2	2	0	0	1	0	2	2	0	4.7	4.7	4.7	46.575	425	425;558;391;558	0	4.1253		By matching		By MS/MS	By MS/MS		0	2.6	0	4.7	4.7	0
P00558-2;P00558	P00558-2;P00558	1;1	1;1	1;1	Phosphoglycerate kinase 1	PGK1	Isoform 2 of Phosphoglycerate kinase 1 OS=Homo sapiens GN=PGK1;Phosphoglycerate kinase 1 OS=Homo sapiens GN=PGK1 PE=1 SV=3	2	1	1	1	0	0	1	1	1	0	0	0	1	1	1	0	0	0	1	1	1	0	4.4	4.4	4.4	41.428	389	389;417	0	38.537			By matching	By MS/MS	By MS/MS		0	0	4.4	4.4	4.4	0
P00749-2;P00749	P00749-2;P00749	2;2	2;2	2;2	Urokinase-type plasminogen activator;Urokinase-type plasminogen activator long chain A;Urokinase-type plasminogen activator short chain A;Urokinase-type plasminogen activator chain B	PLAU	Isoform 2 of Urokinase-type plasminogen activator OS=Homo sapiens GN=PLAU;Urokinase-type plasminogen activator OS=Homo sapiens GN=PLAU PE=1 SV=2	2	2	2	2	0	0	0	2	0	0	0	0	0	2	0	0	0	0	0	2	0	0	8.2	8.2	8.2	46.908	414	414;431	0	25.729				By MS/MS			0	0	0	8.2	0	0
P00750-4;P00750-3;P00750;P00750-2	P00750-4;P00750-3;P00750;P00750-2	2;2;2;1	2;2;2;1	2;2;2;1	Tissue-type plasminogen activator;Tissue-type plasminogen activator chain A;Tissue-type plasminogen activator chain B	PLAT	Isoform 4 of Tissue-type plasminogen activator OS=Homo sapiens GN=PLAT;Isoform 3 of Tissue-type plasminogen activator OS=Homo sapiens GN=PLAT;Tissue-type plasminogen activator OS=Homo sapiens GN=PLAT PE=1 SV=1;Isoform 2 of Tissue-type plasminogen activator	4	2	2	2	0	0	0	2	2	1	0	0	0	2	2	1	0	0	0	2	2	1	7.3	7.3	7.3	44.373	395	395;516;562;291	0	14.895				By MS/MS	By MS/MS	By matching	0	0	0	7.3	7.3	3.3
P02462-2;P02462;P29400;P29400-2	P02462-2;P02462;P29400;P29400-2	2;2;1;1	2;2;1;1	2;2;1;1	Collagen alpha-1(IV) chain;Arresten;Collagen alpha-5(IV) chain	COL4A1;COL4A5	Isoform 2 of Collagen alpha-1(IV) chain OS=Homo sapiens GN=COL4A1;Collagen alpha-1(IV) chain OS=Homo sapiens GN=COL4A1 PE=1 SV=3;Collagen alpha-5(IV) chain OS=Homo sapiens GN=COL4A5 PE=1 SV=2;Isoform 2 of Collagen alpha-5(IV) chain OS=Homo sapiens GN=COL4A	4	2	2	2	1	1	2	0	0	2	1	1	2	0	0	2	1	1	2	0	0	2	2.2	2.2	2.2	127.98	1318	1318;1669;1685;1691	0	50.867	By MS/MS	By MS/MS	By MS/MS			By MS/MS	1.1	1.1	2.2	0	0	2.2
P02545;P02545-3;P02545-6;P02545-5;P02545-2;P02545-4	P02545;P02545-3;P02545-6;P02545-5;P02545-2;P02545-4	15;14;12;11;11;11	15;14;12;11;11;11	15;14;12;11;11;11	Prelamin-A/C;Lamin-A/C	LMNA	Prelamin-A/C OS=Homo sapiens GN=LMNA PE=1 SV=1;Isoform ADelta10 of Prelamin-A/C OS=Homo sapiens GN=LMNA;Isoform 6 of Prelamin-A/C OS=Homo sapiens GN=LMNA;Isoform 5 of Prelamin-A/C OS=Homo sapiens GN=LMNA;Isoform C of Prelamin-A/C OS=Homo sapiens GN=LMNA;Is	6	15	15	15	7	8	7	14	13	10	7	8	7	14	13	10	7	8	7	14	13	10	28.8	28.8	28.8	74.139	664	664;634;614;565;572;574	0	123.49	By MS/MS	By MS/MS	By MS/MS	By MS/MS	By MS/MS	By MS/MS	12.8	16.1	12.3	26.8	25.6	21.2
P02751-15;P02751-13;P02751-7;P02751;P02751-11;P02751-3;P02751-17;P02751-8;P02751-14;P02751-9;P02751-5;P02751-6;P02751-10;P02751-4;P02751-12;P02751-16;P02751-2	P02751-15;P02751-13;P02751-7;P02751;P02751-11;P02751-3;P02751-17;P02751-8;P02751-14;P02751-9;P02751-5;P02751-6;P02751-10;P02751-4;P02751-12;P02751-16;P02751-2	2;2;2;2;2;2;2;2;2;2;2;2;2;2;2;1;1	2;2;2;2;2;2;2;2;2;2;2;2;2;2;2;1;1	2;2;2;2;2;2;2;2;2;2;2;2;2;2;2;1;1	Fibronectin;Anastellin;Ugl-Y1;Ugl-Y2;Ugl-Y3	FN1	Isoform 15 of Fibronectin OS=Homo sapiens GN=FN1;Isoform 13 of Fibronectin OS=Homo sapiens GN=FN1;Isoform 7 of Fibronectin OS=Homo sapiens GN=FN1;Fibronectin OS=Homo sapiens GN=FN1 PE=1 SV=4;Isoform 11 of Fibronectin OS=Homo sapiens GN=FN1;Isoform 3 of Fib	17	2	2	2	0	0	2	0	0	1	0	0	2	0	0	1	0	0	2	0	0	1	0.9	0.9	0.9	272.32	2477	2477;2267;2446;2386;2386;2355;2330;2296;2265;2240;2211;2184;2176;2031;2008;657;642	0	3.3337			By MS/MS			By MS/MS	0	0	0.9	0	0	0.3
P02786;Q9UP52-2;Q9UP52-3;Q9UP52	P02786	4;1;1;1	4;1;1;1	4;1;1;1	Transferrin receptor protein 1;Transferrin receptor protein 1, serum form	TFRC	Transferrin receptor protein 1 OS=Homo sapiens GN=TFRC PE=1 SV=2	4	4	4	4	0	0	1	4	3	0	0	0	1	4	3	0	0	0	1	4	3	0	5.9	5.9	5.9	84.87	760	760;630;774;801	0	52.728			By matching	By MS/MS	By MS/MS		0	0	1.3	5.9	4.6	0
P04075;P04075-2	P04075;P04075-2	1;1	1;1	1;1	Fructose-bisphosphate aldolase A	ALDOA	Fructose-bisphosphate aldolase A OS=Homo sapiens GN=ALDOA PE=1 SV=2;Isoform 2 of Fructose-bisphosphate aldolase A OS=Homo sapiens GN=ALDOA	2	1	1	1	1	0	0	1	1	0	1	0	0	1	1	0	1	0	0	1	1	0	3	3	3	39.42	364	364;418	0	2.8559	By MS/MS			By MS/MS	By MS/MS		3	0	0	3	3	0
P04083	P04083	1	1	1	Annexin A1	ANXA1	Annexin A1 OS=Homo sapiens GN=ANXA1 PE=1 SV=2	1	1	1	1	0	0	0	1	1	0	0	0	0	1	1	0	0	0	0	1	1	0	3.2	3.2	3.2	38.714	346	346	0	2.5221				By MS/MS	By MS/MS		0	0	0	3.2	3.2	0
P04150-9;P04150-2;P04150-6;P04150-8;P04150-10;P04150;P04150-3;P04150-7;P04150-5;P04150-16;P04150-15;P04150-14;P04150-13;P04150-12;P04150-11	P04150-9;P04150-2;P04150-6;P04150-8;P04150-10;P04150;P04150-3;P04150-7;P04150-5	3;3;3;3;3;3;3;2;2;1;1;1;1;1;1	3;3;3;3;3;3;3;2;2;1;1;1;1;1;1	3;3;3;3;3;3;3;2;2;1;1;1;1;1;1	Glucocorticoid receptor	NR3C1	Isoform Beta-B of Glucocorticoid receptor OS=Homo sapiens GN=NR3C1;Isoform Beta of Glucocorticoid receptor OS=Homo sapiens GN=NR3C1;Isoform Beta-2 of Glucocorticoid receptor OS=Homo sapiens GN=NR3C1;Isoform Alpha-B of Glucocorticoid receptor OS=Homo sapien	15	3	3	3	0	0	0	3	3	0	0	0	0	3	3	0	0	0	0	3	3	0	7	7	7	78.695	716	716;742;743;751;751;777;778;558;593;442;447;462;680;688;692	0	190.4				By MS/MS	By MS/MS		0	0	0	7	7	0
P04183	P04183	1	1	1	Thymidine kinase, cytosolic	TK1	Thymidine kinase, cytosolic OS=Homo sapiens GN=TK1 PE=1 SV=2	1	1	1	1	0	0	0	1	1	1	0	0	0	1	1	1	0	0	0	1	1	1	11.5	11.5	11.5	25.468	234	234	0	2.383				By MS/MS	By MS/MS	By matching	0	0	0	11.5	11.5	11.5
P04264;CON__P04264	P04264;CON__P04264	15;14	15;14	12;11	Keratin, type II cytoskeletal 1	KRT1	Keratin, type II cytoskeletal 1 OS=Homo sapiens GN=KRT1 PE=1 SV=6;	2	15	15	12	1	4	4	13	15	4	1	4	4	13	15	4	1	2	3	10	12	2	32.8	32.8	28.1	66.038	644	644;644	0	131.44	By MS/MS	By MS/MS	By MS/MS	By MS/MS	By MS/MS	By MS/MS	1.7	9.5	9.3	26.4	32.8	9.3
P04406-2;P04406	P04406-2;P04406	2;2	2;2	2;2	Glyceraldehyde-3-phosphate dehydrogenase	GAPDH	Isoform 2 of Glyceraldehyde-3-phosphate dehydrogenase OS=Homo sapiens GN=GAPDH;Glyceraldehyde-3-phosphate dehydrogenase OS=Homo sapiens GN=GAPDH PE=1 SV=3	2	2	2	2	0	1	1	2	2	1	0	1	1	2	2	1	0	1	1	2	2	1	10.9	10.9	10.9	31.548	293	293;335	0	5.5346		By matching	By MS/MS	By MS/MS	By MS/MS	By MS/MS	0	5.8	5.8	10.9	10.9	5.8
P04844-2;P04844	P04844-2;P04844	2;2	2;2	2;2	Dolichyl-diphosphooligosaccharide--protein glycosyltransferase subunit 2	RPN2	Isoform 2 of Dolichyl-diphosphooligosaccharide--protein glycosyltransferase subunit 2 OS=Homo sapiens GN=RPN2;Dolichyl-diphosphooligosaccharide--protein glycosyltransferase subunit 2 OS=Homo sapiens GN=RPN2 PE=1 SV=3	2	2	2	2	0	0	0	2	2	0	0	0	0	2	2	0	0	0	0	2	2	0	3.7	3.7	3.7	67.723	615	615;631	0	3.7823				By MS/MS	By MS/MS		0	0	0	3.7	3.7	0
P05023-3;P05023-4;P05023;P05023-2;P13637;P13637-2;P13637-3;P50993;P20648	P05023-3;P05023-4;P05023;P05023-2	7;7;7;5;3;3;3;2;1	7;7;7;5;3;3;3;2;1	7;7;7;5;3;3;3;2;1	Sodium/potassium-transporting ATPase subunit alpha-1	ATP1A1	Isoform 3 of Sodium/potassium-transporting ATPase subunit alpha-1 OS=Homo sapiens GN=ATP1A1;Isoform 4 of Sodium/potassium-transporting ATPase subunit alpha-1 OS=Homo sapiens GN=ATP1A1;Sodium/potassium-transporting ATPase subunit alpha-1 OS=Homo sapiens GN=	9	7	7	7	1	3	2	5	6	3	1	3	2	5	6	3	1	3	2	5	6	3	9	9	9	109.55	992	992;1023;1023;681;1013;1024;1026;1020;1035	0	32.326	By MS/MS	By MS/MS	By MS/MS	By MS/MS	By MS/MS	By MS/MS	1.3	3.7	2.4	7.1	7.9	4.2
P05114	P05114	12	12	12	Non-histone chromosomal protein HMG-14	HMGN1	Non-histone chromosomal protein HMG-14 OS=Homo sapiens GN=HMGN1 PE=1 SV=3	1	12	12	12	11	10	11	2	2	10	11	10	11	2	2	10	11	10	11	2	2	10	54	54	54	10.659	100	100	0	150.17	By MS/MS	By MS/MS	By MS/MS	By MS/MS	By MS/MS	By MS/MS	54	54	54	14	14	54
P05141;P12235;Q9H0C2	P05141;P12235	7;4;2	7;4;2	3;1;0	ADP/ATP translocase 2;ADP/ATP translocase 2, N-terminally processed;ADP/ATP translocase 1	SLC25A5;SLC25A4	ADP/ATP translocase 2 OS=Homo sapiens GN=SLC25A5 PE=1 SV=7;ADP/ATP translocase 1 OS=Homo sapiens GN=SLC25A4 PE=1 SV=4	3	7	7	3	1	2	3	6	6	2	1	2	3	6	6	2	0	1	1	2	2	1	22.1	22.1	10.1	32.852	298	298;298;315	0	19.308	By matching	By MS/MS	By MS/MS	By MS/MS	By MS/MS	By MS/MS	2.7	5.7	8.4	19.5	17.8	5.7
P05198	P05198	5	5	5	Eukaryotic translation initiation factor 2 subunit 1	EIF2S1	Eukaryotic translation initiation factor 2 subunit 1 OS=Homo sapiens GN=EIF2S1 PE=1 SV=3	1	5	5	5	1	2	1	5	4	2	1	2	1	5	4	2	1	2	1	5	4	2	20.6	20.6	20.6	36.112	315	315	0	63.978	By matching	By MS/MS	By MS/MS	By MS/MS	By MS/MS	By MS/MS	3.8	7.9	4.1	20.6	17.5	7.9
P05204;Q15651-2	P05204	11;2	11;2	8;0	Non-histone chromosomal protein HMG-17	HMGN2	Non-histone chromosomal protein HMG-17 OS=Homo sapiens GN=HMGN2 PE=1 SV=3	2	11	11	8	9	11	9	4	3	9	9	11	9	4	3	9	7	8	7	4	3	7	61.1	61.1	48.9	9.3926	90	90;77	0	141.01	By MS/MS	By MS/MS	By MS/MS	By MS/MS	By MS/MS	By MS/MS	53.3	61.1	53.3	36.7	34.4	53.3
P05388-2;Q8NHW5;P05388	P05388-2;Q8NHW5;P05388	1;1;1	1;1;1	1;1;1	60S acidic ribosomal protein P0;60S acidic ribosomal protein P0-like	RPLP0;RPLP0P6	Isoform 2 of 60S acidic ribosomal protein P0 OS=Homo sapiens GN=RPLP0;60S acidic ribosomal protein P0-like OS=Homo sapiens GN=RPLP0P6 PE=5 SV=1;60S acidic ribosomal protein P0 OS=Homo sapiens GN=RPLP0 PE=1 SV=1	3	1	1	1	0	0	0	1	1	0	0	0	0	1	1	0	0	0	0	1	1	0	8.6	8.6	8.6	27.435	255	255;317;317	0	2.6373				By MS/MS	By MS/MS		0	0	0	8.6	8.6	0
P05783	P05783	3	3	3	Keratin, type I cytoskeletal 18	KRT18	Keratin, type I cytoskeletal 18 OS=Homo sapiens GN=KRT18 PE=1 SV=2	1	3	3	3	0	0	0	3	3	0	0	0	0	3	3	0	0	0	0	3	3	0	9.5	9.5	9.5	48.057	430	430	0	11.158				By MS/MS	By MS/MS		0	0	0	9.5	9.5	0
P06400	P06400	2	2	2	Retinoblastoma-associated protein	RB1	Retinoblastoma-associated protein OS=Homo sapiens GN=RB1 PE=1 SV=2	1	2	2	2	0	0	1	1	1	1	0	0	1	1	1	1	0	0	1	1	1	1	2.3	2.3	2.3	106.16	928	928	0	50.551			By MS/MS	By MS/MS	By MS/MS	By MS/MS	0	0	0.9	1.4	1.4	0.9
P06493;P06493-2;Q00526	P06493;P06493-2	5;4;2	4;4;1	3;3;0	Cyclin-dependent kinase 1	CDK1	Cyclin-dependent kinase 1 OS=Homo sapiens GN=CDK1 PE=1 SV=3;Isoform 2 of Cyclin-dependent kinase 1 OS=Homo sapiens GN=CDK1	3	5	4	3	1	0	1	3	4	2	0	0	0	3	4	1	0	0	0	2	3	0	17.5	14.8	11.1	34.095	297	297;240;305	0	9.8	By matching		By matching	By MS/MS	By MS/MS	By MS/MS	2.7	0	2.7	10.1	14.8	6.4
P06733-2;P06733	P06733-2;P06733	2;2	2;2	2;2	Alpha-enolase	ENO1	Isoform MBP-1 of Alpha-enolase OS=Homo sapiens GN=ENO1;Alpha-enolase OS=Homo sapiens GN=ENO1 PE=1 SV=2	2	2	2	2	0	2	2	1	2	2	0	2	2	1	2	2	0	2	2	1	2	2	6.7	6.7	6.7	36.928	341	341;434	0	13.931		By MS/MS	By MS/MS	By MS/MS	By MS/MS	By MS/MS	0	6.7	6.7	4.4	6.7	6.7
P06748-2;P06748	P06748-2;P06748	5;5	5;5	1;1	Nucleophosmin	NPM1	Isoform 2 of Nucleophosmin OS=Homo sapiens GN=NPM1;Nucleophosmin OS=Homo sapiens GN=NPM1 PE=1 SV=2	2	5	5	1	4	5	4	2	3	4	4	5	4	2	3	4	1	1	0	0	0	0	23	23	3.8	29.464	265	265;294	0	15.931	By MS/MS	By MS/MS	By MS/MS	By MS/MS	By MS/MS	By MS/MS	9.1	23	19.2	4.2	5.3	19.2
P07195	P07195	3	2	2	L-lactate dehydrogenase B chain	LDHB	L-lactate dehydrogenase B chain OS=Homo sapiens GN=LDHB PE=1 SV=2	1	3	2	2	0	1	1	3	3	1	0	0	0	2	2	0	0	0	0	2	2	0	11.1	7.5	7.5	36.638	334	334	0	4.1324		By matching	By matching	By MS/MS	By MS/MS	By matching	0	3.6	3.6	11.1	11.1	3.6
P07305;P07305-2	P07305;P07305-2	7;4	7;4	7;4	Histone H1.0;Histone H1.0, N-terminally processed	H1F0	Histone H1.0 OS=Homo sapiens GN=H1F0 PE=1 SV=3;Isoform 2 of Histone H1.0 OS=Homo sapiens GN=H1F0	2	7	7	7	5	6	5	5	5	6	5	6	5	5	5	6	5	6	5	5	5	6	28.4	28.4	28.4	20.863	194	194;177	0	24.322	By MS/MS	By MS/MS	By MS/MS	By MS/MS	By MS/MS	By MS/MS	23.7	24.2	21.1	17	17.5	21.6
P07437;P04350;Q9BVA1;Q13885;Q3ZCM7;A6NNZ2	P07437;P04350;Q9BVA1;Q13885	5;3;3;3;2;2	1;0;0;0;0;0	1;0;0;0;0;0	Tubulin beta chain;Tubulin beta-4A chain;Tubulin beta-2B chain;Tubulin beta-2A chain	TUBB;TUBB4A;TUBB2B;TUBB2A	Tubulin beta chain OS=Homo sapiens GN=TUBB PE=1 SV=2;Tubulin beta-4A chain OS=Homo sapiens GN=TUBB4A PE=1 SV=2;Tubulin beta-2B chain OS=Homo sapiens GN=TUBB2B PE=1 SV=1;Tubulin beta-2A chain OS=Homo sapiens GN=TUBB2A PE=1 SV=1	6	5	1	1	3	2	2	5	5	2	0	0	0	1	1	0	0	0	0	1	1	0	12.2	2.7	2.7	49.67	444	444;444;445;445;444;444	0.0027454	1.8116	By matching	By matching	By matching	By MS/MS	By MS/MS	By matching	6.8	4.1	4.7	12.2	12.2	4.7
P07737	P07737	2	2	2	Profilin-1	PFN1	Profilin-1 OS=Homo sapiens GN=PFN1 PE=1 SV=2	1	2	2	2	1	1	1	2	1	1	1	1	1	2	1	1	1	1	1	2	1	1	12.1	12.1	12.1	15.054	140	140	0	4.9714	By MS/MS	By matching	By MS/MS	By MS/MS	By MS/MS	By MS/MS	10	10	10	12.1	10	10
P07741-2;P07741	P07741-2;P07741	1;1	1;1	1;1	Adenine phosphoribosyltransferase	APRT	Isoform 2 of Adenine phosphoribosyltransferase OS=Homo sapiens GN=APRT;Adenine phosphoribosyltransferase OS=Homo sapiens GN=APRT PE=1 SV=2	2	1	1	1	0	0	0	1	1	0	0	0	0	1	1	0	0	0	0	1	1	0	8.2	8.2	8.2	14.557	134	134;180	0	2.7176				By MS/MS	By MS/MS		0	0	0	8.2	8.2	0
P07814	P07814	14	14	14	Bifunctional glutamate/proline--tRNA ligase;Glutamate--tRNA ligase;Proline--tRNA ligase	EPRS	Bifunctional glutamate/proline--tRNA ligase OS=Homo sapiens GN=EPRS PE=1 SV=5	1	14	14	14	3	7	7	13	13	5	3	7	7	13	13	5	3	7	7	13	13	5	11.6	11.6	11.6	170.59	1512	1512	0	73.997	By MS/MS	By MS/MS	By MS/MS	By MS/MS	By MS/MS	By MS/MS	2.6	6.9	6.2	11.4	10.9	4.2
P07900-2;P07900;Q14568	P07900-2;P07900	12;12;3	12;12;3	7;7;1	Heat shock protein HSP 90-alpha	HSP90AA1	Isoform 2 of Heat shock protein HSP 90-alpha OS=Homo sapiens GN=HSP90AA1;Heat shock protein HSP 90-alpha OS=Homo sapiens GN=HSP90AA1 PE=1 SV=5	3	12	12	7	1	3	3	11	9	6	1	3	3	11	9	6	0	2	2	6	5	3	14.9	14.9	7.7	98.16	854	854;732;343	0	90.662	By matching	By matching	By matching	By MS/MS	By MS/MS	By MS/MS	1.1	3.4	3.7	14.1	10.3	7.7
P07910-4;P07910-2;P07910;P07910-3;P0DMR1;O60812;B7ZW38;B2RXH8	P07910-4;P07910-2;P07910;P07910-3	4;4;4;3;1;1;1;1	4;4;4;3;1;1;1;1	4;4;4;3;1;1;1;1	Heterogeneous nuclear ribonucleoproteins C1/C2	HNRNPC	Isoform 4 of Heterogeneous nuclear ribonucleoproteins C1/C2 OS=Homo sapiens GN=HNRNPC;Isoform C1 of Heterogeneous nuclear ribonucleoproteins C1/C2 OS=Homo sapiens GN=HNRNPC;Heterogeneous nuclear ribonucleoproteins C1/C2 OS=Homo sapiens GN=HNRNPC PE=1 SV=4;	8	4	4	4	0	2	3	2	4	2	0	2	3	2	4	2	0	2	3	2	4	2	17.2	17.2	17.2	27.821	250	250;293;306;226;293;293;293;293	0	21.918		By MS/MS	By MS/MS	By MS/MS	By MS/MS	By MS/MS	0	8	11.6	10	17.2	8
P07954-2;P07954	P07954-2;P07954	1;1	1;1	1;1	Fumarate hydratase, mitochondrial	FH	Isoform Cytoplasmic of Fumarate hydratase, mitochondrial OS=Homo sapiens GN=FH;Fumarate hydratase, mitochondrial OS=Homo sapiens GN=FH PE=1 SV=3	2	1	1	1	0	0	0	1	0	0	0	0	0	1	0	0	0	0	0	1	0	0	3	3	3	50.212	467	467;510	0.0014255	2.0277				By MS/MS			0	0	0	3	0	0
P61586;P08134	P61586;P08134	1;1	1;1	1;1	Transforming protein RhoA;Rho-related GTP-binding protein RhoC	RHOA;RHOC	Transforming protein RhoA OS=Homo sapiens GN=RHOA PE=1 SV=1;Rho-related GTP-binding protein RhoC OS=Homo sapiens GN=RHOC PE=1 SV=1	2	1	1	1	0	0	0	1	1	1	0	0	0	1	1	1	0	0	0	1	1	1	5.7	5.7	5.7	21.768	193	193;193	0.0059211	1.5998				By MS/MS	By MS/MS	By matching	0	0	0	5.7	5.7	5.7
P08238;Q58FF8;Q58FF7;Q58FG0;Q58FF6	P08238	9;4;3;1;1	4;1;1;0;0	4;1;1;0;0	Heat shock protein HSP 90-beta	HSP90AB1	Heat shock protein HSP 90-beta OS=Homo sapiens GN=HSP90AB1 PE=1 SV=4	5	9	4	4	2	2	3	9	8	5	1	1	2	4	4	2	1	1	2	4	4	2	14.6	6.2	6.2	83.263	724	724;381;597;334;505	0	98.588	By MS/MS	By MS/MS	By matching	By MS/MS	By MS/MS	By matching	2.8	2.8	4	14.6	13	7.9
P08240-2;P08240	P08240-2;P08240	5;5	5;5	5;5	Signal recognition particle receptor subunit alpha	SRPR	Isoform 2 of Signal recognition particle receptor subunit alpha OS=Homo sapiens GN=SRPRA;Signal recognition particle receptor subunit alpha OS=Homo sapiens GN=SRPRA PE=1 SV=2	2	5	5	5	1	2	1	2	3	3	1	2	1	2	3	3	1	2	1	2	3	3	8.2	8.2	8.2	66.558	610	610;638	0	14.864	By matching	By MS/MS	By MS/MS	By MS/MS	By MS/MS	By MS/MS	2.8	3	2.8	4.9	6.4	4.6
P08243-3;P08243-2;P08243	P08243-3;P08243-2;P08243	1;1;1	1;1;1	1;1;1	Asparagine synthetase [glutamine-hydrolyzing]	ASNS	Isoform 3 of Asparagine synthetase [glutamine-hydrolyzing] OS=Homo sapiens GN=ASNS;Isoform 2 of Asparagine synthetase [glutamine-hydrolyzing] OS=Homo sapiens GN=ASNS;Asparagine synthetase [glutamine-hydrolyzing] OS=Homo sapiens GN=ASNS PE=1 SV=4	3	1	1	1	1	1	0	1	1	0	1	1	0	1	1	0	1	1	0	1	1	0	2.3	2.3	2.3	54.817	478	478;540;561	0	2.7627	By matching	By matching		By MS/MS	By MS/MS		2.3	2.3	0	2.3	2.3	0
P08572	P08572	5	5	5	Collagen alpha-2(IV) chain;Canstatin	COL4A2	Collagen alpha-2(IV) chain OS=Homo sapiens GN=COL4A2 PE=1 SV=4	1	5	5	5	2	5	4	0	0	4	2	5	4	0	0	4	2	5	4	0	0	4	4.1	4.1	4.1	167.55	1712	1712	0	40.284	By MS/MS	By MS/MS	By MS/MS			By MS/MS	1.6	4.1	3.2	0	0	3.4
P08621;P08621-2;P08621-4;P08621-3	P08621;P08621-2;P08621-4	13;12;9;4	13;12;9;4	13;12;9;4	U1 small nuclear ribonucleoprotein 70 kDa	SNRNP70	U1 small nuclear ribonucleoprotein 70 kDa OS=Homo sapiens GN=SNRNP70 PE=1 SV=2;Isoform 2 of U1 small nuclear ribonucleoprotein 70 kDa OS=Homo sapiens GN=SNRNP70;Isoform 4 of U1 small nuclear ribonucleoprotein 70 kDa OS=Homo sapiens GN=SNRNP70	4	13	13	13	10	11	12	5	4	13	10	11	12	5	4	13	10	11	12	5	4	13	24.9	24.9	24.9	51.556	437	437;428;341;166	0	121.34	By MS/MS	By MS/MS	By MS/MS	By MS/MS	By MS/MS	By MS/MS	22.4	24.3	24.7	12.1	14.2	24.9
P08670;P17661;P41219;P41219-2;Q16352;P07197-2;P07196;P07197;P12036-2;P12036	P08670	26;5;3;3;1;1;1;1;1;1	26;5;3;3;1;1;1;1;1;1	23;3;1;1;1;1;1;1;1;1	Vimentin	VIM	Vimentin OS=Homo sapiens GN=VIM PE=1 SV=4	10	26	26	23	7	7	11	21	23	15	7	7	11	21	23	15	6	5	9	19	20	13	51.1	51.1	47.6	53.651	466	466;470;470;471;499;540;543;916;963;1026	0	172.94	By MS/MS	By MS/MS	By MS/MS	By MS/MS	By MS/MS	By MS/MS	17.2	15.7	19.1	46.1	45.7	33
P08708	P08708	2	2	2	40S ribosomal protein S17	RPS17	40S ribosomal protein S17 OS=Homo sapiens GN=RPS17 PE=1 SV=2	1	2	2	2	1	1	1	1	2	2	1	1	1	1	2	2	1	1	1	1	2	2	8.9	8.9	8.9	15.55	135	135	0	3.5881	By MS/MS	By MS/MS	By MS/MS	By MS/MS	By MS/MS	By MS/MS	8.9	8.1	8.9	8.9	8.9	8.9
P09132	P09132	1	1	1	Signal recognition particle 19 kDa protein	SRP19	Signal recognition particle 19 kDa protein OS=Homo sapiens GN=SRP19 PE=1 SV=3	1	1	1	1	0	1	0	0	0	1	0	1	0	0	0	1	0	1	0	0	0	1	10.4	10.4	10.4	16.156	144	144	0	18.988		By MS/MS				By MS/MS	0	10.4	0	0	0	10.4
P09429;B2RPK0	P09429;B2RPK0	4;3	4;3	3;2	High mobility group protein B1;Putative high mobility group protein B1-like 1	HMGB1;HMGB1P1	High mobility group protein B1 OS=Homo sapiens GN=HMGB1 PE=1 SV=3;Putative high mobility group protein B1-like 1 OS=Homo sapiens GN=HMGB1P1 PE=5 SV=1	2	4	4	3	1	2	3	1	0	4	1	2	3	1	0	4	0	1	2	1	0	3	22.8	22.8	19.1	24.893	215	215;211	0	7.1919	By MS/MS	By MS/MS	By MS/MS	By matching		By MS/MS	3.7	8.4	14.4	4.7	0	22.8
P09651-3;P09651-2;P09651;Q32P51	P09651-3;P09651-2;P09651	5;5;5;1	5;5;5;1	5;5;5;1	Heterogeneous nuclear ribonucleoprotein A1;Heterogeneous nuclear ribonucleoprotein A1, N-terminally processed	HNRNPA1	Isoform 2 of Heterogeneous nuclear ribonucleoprotein A1 OS=Homo sapiens GN=HNRNPA1;Isoform A1-A of Heterogeneous nuclear ribonucleoprotein A1 OS=Homo sapiens GN=HNRNPA1;Heterogeneous nuclear ribonucleoprotein A1 OS=Homo sapiens GN=HNRNPA1 PE=1 SV=5	4	5	5	5	2	3	4	4	4	4	2	3	4	4	4	4	2	3	4	4	4	4	17.2	17.2	17.2	29.386	267	267;320;372;320	0	80.858	By MS/MS	By MS/MS	By MS/MS	By MS/MS	By MS/MS	By MS/MS	10.1	16.9	17.2	12	12	17.2
P09874	P09874	6	6	6	Poly [ADP-ribose] polymerase 1	PARP1	Poly [ADP-ribose] polymerase 1 OS=Homo sapiens GN=PARP1 PE=1 SV=4	1	6	6	6	3	4	4	5	4	2	3	4	4	5	4	2	3	4	4	5	4	2	6.3	6.3	6.3	113.08	1014	1014	0	30.153	By matching	By MS/MS	By MS/MS	By MS/MS	By MS/MS	By MS/MS	3.5	4.4	3.3	6.2	5.2	2.2
P09914-2;P09914;Q5T764	P09914-2;P09914;Q5T764	2;2;1	2;2;1	2;2;1	Interferon-induced protein with tetratricopeptide repeats 1;Interferon-induced protein with tetratricopeptide repeats 1B	IFIT1;IFIT1B	Isoform 2 of Interferon-induced protein with tetratricopeptide repeats 1 OS=Homo sapiens GN=IFIT1;Interferon-induced protein with tetratricopeptide repeats 1 OS=Homo sapiens GN=IFIT1 PE=1 SV=2;Interferon-induced protein with tetratricopeptide repeats 1B OS	3	2	2	2	0	0	0	2	1	0	0	0	0	2	1	0	0	0	0	2	1	0	6.5	6.5	6.5	51.713	447	447;478;474	0	97.801				By MS/MS	By MS/MS		0	0	0	6.5	3.8	0
Q9BTM1-2;Q9BTM1;Q6FI13;P0C0S8;Q16777;P20671;Q99878;Q96KK5;P0C0S5;Q71UI9-2;Q71UI9;P04908;Q93077;Q7L7L0;Q8IUE6;Q96QV6;P16104;Q71UI9-5	Q9BTM1-2;Q9BTM1;Q6FI13;P0C0S8;Q16777;P20671;Q99878;Q96KK5;P0C0S5;Q71UI9-2;Q71UI9;P04908;Q93077;Q7L7L0;Q8IUE6;Q96QV6;P16104;Q71UI9-5	2;2;2;2;2;2;2;2;1;1;1;1;1;1;1;1;1;1	2;2;2;2;2;2;2;2;1;1;1;1;1;1;1;1;1;1	2;2;2;2;2;2;2;2;1;1;1;1;1;1;1;1;1;1	Histone H2A.J;Histone H2A type 2-A;Histone H2A type 1;Histone H2A type 2-C;Histone H2A type 1-D;Histone H2A type 1-J;Histone H2A type 1-H;Histone H2A.Z;Histone H2A.V;Histone H2A type 1-B/E;Histone H2A type 1-C;Histone H2A type 3;Histone H2A type 2-B;Histone H2A type 1-A;Histone H2AX	H2AFJ;HIST2H2AA3;HIST1H2AG;HIST2H2AC;HIST1H2AD;HIST1H2AJ;HIST1H2AH;H2AFZ;H2AFV;HIST1H2AB;HIST1H2AC;HIST3H2A;HIST2H2AB;HIST1H2AA;H2AFX	Isoform 2 of Histone H2A.J OS=Homo sapiens GN=H2AFJ;Histone H2A.J OS=Homo sapiens GN=H2AFJ PE=1 SV=1;Histone H2A type 2-A OS=Homo sapiens GN=HIST2H2AA3 PE=1 SV=3;Histone H2A type 1 OS=Homo sapiens GN=HIST1H2AG PE=1 SV=2;Histone H2A type 2-C OS=Homo sapiens	18	2	2	2	1	1	2	1	0	1	1	1	2	1	0	1	1	1	2	1	0	1	13.2	13.2	13.2	16.109	151	151;129;130;130;129;130;128;128;128;114;128;130;130;130;130;131;143;66	0	4.0133	By MS/MS	By MS/MS	By MS/MS	By MS/MS		By MS/MS	6	6	13.2	6	0	6
P0CG39;P0CG38	P0CG39;P0CG38	3;3	1;1	1;1	POTE ankyrin domain family member J;POTE ankyrin domain family member I	POTEJ;POTEI	POTE ankyrin domain family member J OS=Homo sapiens GN=POTEJ PE=3 SV=1;POTE ankyrin domain family member I OS=Homo sapiens GN=POTEI PE=3 SV=1	2	3	1	1	2	1	3	2	2	1	0	0	1	0	0	0	0	0	1	0	0	0	3.8	1.5	1.5	117.39	1038	1038;1075	1	-2	By matching	By matching	By MS/MS	By matching	By matching	By matching	2.2	1	3.8	2.2	2.2	1
P0DMV8-2;P0DMV9;P0DMV8;P34931	P0DMV8-2;P0DMV9;P0DMV8;P34931	3;3;3;2	2;2;2;1	1;1;1;0	Heat shock 70 kDa protein 1A;Heat shock 70 kDa protein 1B;Heat shock 70 kDa protein 1-like	HSPA1A;HSPA1B;HSPA1L	Isoform 2 of Heat shock 70 kDa protein 1A OS=Homo sapiens GN=HSPA1A;Heat shock 70 kDa protein 1B OS=Homo sapiens GN=HSPA1B PE=1 SV=1;Heat shock 70 kDa protein 1A OS=Homo sapiens GN=HSPA1A PE=1 SV=1;Heat shock 70 kDa protein 1-like OS=Homo sapiens GN=HSPA1L	4	3	2	1	1	1	0	3	3	1	0	0	0	2	2	0	0	0	0	1	1	0	7.5	5.3	2.6	63.936	586	586;641;641;641	0	9.8448	By matching	By matching		By MS/MS	By MS/MS	By matching	2.2	2.2	0	7.5	7.5	2.2
P0DN76;Q01081;Q01081-2;Q01081-4;Q8WU68-3;Q8WU68;Q01081-3;Q8WU68-2	P0DN76;Q01081;Q01081-2;Q01081-4	5;5;4;3;2;2;1;1	5;5;4;3;2;2;1;1	5;5;4;3;2;2;1;1	Splicing factor U2AF 35 kDa subunit	U2AF1	Splicing factor U2AF 35 kDa subunit-like protein OS=Homo sapiens GN=U2AF1L5 PE=1 SV=1;Splicing factor U2AF 35 kDa subunit OS=Homo sapiens GN=U2AF1 PE=1 SV=3;Isoform 2 of Splicing factor U2AF 35 kDa subunit OS=Homo sapiens GN=U2AF1;Isoform 4 of Splicing fac	8	5	5	5	5	3	3	2	2	3	5	3	3	2	2	3	5	3	3	2	2	3	18.3	18.3	18.3	27.872	240	240;240;240;167;181;220;75;202	0	19.343	By MS/MS	By MS/MS	By MS/MS	By MS/MS	By MS/MS	By MS/MS	18.3	12.5	12.5	9.2	9.2	12.5
P0DP91;Q03468	P0DP91;Q03468	2;2	2;2	2;2	DNA excision repair protein ERCC-6	ERCC6	Chimeric ERCC6-PGBD3 protein OS=Homo sapiens GN=CSB-PGBD3 PE=1 SV=1;DNA excision repair protein ERCC-6 OS=Homo sapiens GN=ERCC6 PE=1 SV=1	2	2	2	2	0	0	1	2	2	0	0	0	1	2	2	0	0	0	1	2	2	0	3	3	3	119.49	1061	1061;1493	0	18.621			By matching	By MS/MS	By MS/MS		0	0	1.2	3	3	0
P0DPB5;P0DPB6	P0DPB5;P0DPB6	1;1	1;1	1;1			Protein POLR1D, isoform 2 OS=Homo sapiens GN=POLR1D PE=1 SV=1;DNA-directed RNA polymerases I and III subunit RPAC2 OS=Homo sapiens GN=POLR1D PE=1 SV=1	2	1	1	1	1	1	1	1	1	1	1	1	1	1	1	1	1	1	1	1	1	1	8.2	8.2	8.2	14.332	122	122;133	0.0014472	2.1223	By MS/MS	By MS/MS	By MS/MS	By MS/MS	By matching	By MS/MS	8.2	8.2	8.2	8.2	8.2	8.2
P10275-4	P10275-4	1	1	1			Isoform 4 of Androgen receptor OS=Homo sapiens GN=AR	1	1	1	1	0	0	0	0	0	1	0	0	0	0	0	1	0	0	0	0	0	1	2.8	2.8	2.8	67.658	648	648	1	-2						By MS/MS	0	0	0	0	0	2.8
P10412;P16402;Q02539;P16401;P22492	P10412;P16402	18;12;8;5;4	6;0;0;0;0	6;0;0;0;0	Histone H1.4;Histone H1.3	HIST1H1E;HIST1H1D	Histone H1.4 OS=Homo sapiens GN=HIST1H1E PE=1 SV=2;Histone H1.3 OS=Homo sapiens GN=HIST1H1D PE=1 SV=2	5	18	6	6	16	12	14	14	14	15	6	3	4	4	4	5	6	3	4	4	4	5	46.6	18.3	18.3	21.865	219	219;221;215;226;207	0	47.428	By MS/MS	By MS/MS	By MS/MS	By MS/MS	By MS/MS	By MS/MS	45.2	34.7	38.8	39.7	39.7	41.1
P11021	P11021	4	4	4	78 kDa glucose-regulated protein	HSPA5	78 kDa glucose-regulated protein OS=Homo sapiens GN=HSPA5 PE=1 SV=2	1	4	4	4	1	1	1	4	3	2	1	1	1	4	3	2	1	1	1	4	3	2	7.5	7.5	7.5	72.332	654	654	0	72.305	By MS/MS	By MS/MS	By MS/MS	By MS/MS	By MS/MS	By MS/MS	1.8	1.8	1.8	7.5	7.3	4.1
P11142;P11142-2;P54652	P11142;P11142-2	7;6;3	7;6;3	6;5;2	Heat shock cognate 71 kDa protein	HSPA8	Heat shock cognate 71 kDa protein OS=Homo sapiens GN=HSPA8 PE=1 SV=1;Isoform 2 of Heat shock cognate 71 kDa protein OS=Homo sapiens GN=HSPA8	3	7	7	6	3	3	2	6	7	3	3	3	2	6	7	3	2	2	2	5	6	2	14.1	14.1	12.1	70.897	646	646;493;639	0	48.587	By MS/MS	By MS/MS	By MS/MS	By MS/MS	By MS/MS	By MS/MS	6.8	6.8	4.8	11.3	14.1	6.8
P11166	P11166	1	1	1	Solute carrier family 2, facilitated glucose transporter member 1	SLC2A1	Solute carrier family 2, facilitated glucose transporter member 1 OS=Homo sapiens GN=SLC2A1 PE=1 SV=2	1	1	1	1	0	1	0	1	1	0	0	1	0	1	1	0	0	1	0	1	1	0	2	2	2	54.083	492	492	0.0014265	2.0373		By matching		By MS/MS	By MS/MS		0	2	0	2	2	0
P11216	P11216	1	1	1	Glycogen phosphorylase, brain form	PYGB	Glycogen phosphorylase, brain form OS=Homo sapiens GN=PYGB PE=1 SV=5	1	1	1	1	0	0	1	1	1	0	0	0	1	1	1	0	0	0	1	1	1	0	1.2	1.2	1.2	96.695	843	843	0.0046667	1.6715			By matching	By matching	By MS/MS		0	0	1.2	1.2	1.2	0
P11387;Q969P6-2;Q969P6	P11387	26;2;2	26;2;2	26;2;2	DNA topoisomerase 1	TOP1	DNA topoisomerase 1 OS=Homo sapiens GN=TOP1 PE=1 SV=2	3	26	26	26	23	21	18	14	14	25	23	21	18	14	14	25	23	21	18	14	14	25	34.2	34.2	34.2	90.725	765	765;503;601	0	269.19	By MS/MS	By MS/MS	By MS/MS	By MS/MS	By MS/MS	By MS/MS	29	28.6	22.2	20	17.9	32.2
P11388;P11388-2;P11388-3;P11388-4	P11388;P11388-2;P11388-3;P11388-4	29;29;29;29	29;29;29;29	26;26;26;26	DNA topoisomerase 2-alpha	TOP2A	DNA topoisomerase 2-alpha OS=Homo sapiens GN=TOP2A PE=1 SV=3;Isoform 2 of DNA topoisomerase 2-alpha OS=Homo sapiens GN=TOP2A;Isoform 3 of DNA topoisomerase 2-alpha OS=Homo sapiens GN=TOP2A;Isoform 4 of DNA topoisomerase 2-alpha OS=Homo sapiens GN=TOP2A	4	29	29	26	19	21	18	16	16	24	19	21	18	16	16	24	17	18	17	15	15	22	17.9	17.9	16.2	174.38	1531	1531;1557;1567;1612	0	323.31	By MS/MS	By MS/MS	By MS/MS	By MS/MS	By MS/MS	By MS/MS	11.4	13.3	10.8	10.6	10.3	15.5
P11413;P11413-2;P11413-3	P11413;P11413-2;P11413-3	2;2;1	2;2;1	2;2;1	Glucose-6-phosphate 1-dehydrogenase	G6PD	Glucose-6-phosphate 1-dehydrogenase OS=Homo sapiens GN=G6PD PE=1 SV=4;Isoform Long of Glucose-6-phosphate 1-dehydrogenase OS=Homo sapiens GN=G6PD;Isoform 3 of Glucose-6-phosphate 1-dehydrogenase OS=Homo sapiens GN=G6PD	3	2	2	2	1	0	0	2	2	1	1	0	0	2	2	1	1	0	0	2	2	1	4.7	4.7	4.7	59.256	515	515;561;545	0	113.18	By matching			By MS/MS	By MS/MS	By matching	1.6	0	0	4.7	4.7	1.6
P11940-2;P11940;Q9H361;Q4VXU2-2;Q96DU9-2;Q96DU9;Q4VXU2	P11940-2;P11940;Q9H361	3;3;2;1;1;1;1	3;3;2;1;1;1;1	3;3;2;1;1;1;1	Polyadenylate-binding protein 1;Polyadenylate-binding protein 3	PABPC1;PABPC3	Isoform 2 of Polyadenylate-binding protein 1 OS=Homo sapiens GN=PABPC1;Polyadenylate-binding protein 1 OS=Homo sapiens GN=PABPC1 PE=1 SV=2;Polyadenylate-binding protein 3 OS=Homo sapiens GN=PABPC3 PE=1 SV=2	7	3	3	3	0	0	0	2	1	1	0	0	0	2	1	1	0	0	0	2	1	1	4.9	4.9	4.9	61.18	547	547;636;631;330;350;382;614	0	2.7566				By MS/MS	By MS/MS	By MS/MS	0	0	0	3.3	1.8	1.6
P12111-4;P12111-2;P12111	P12111-4;P12111-2;P12111	1;1;1	1;1;1	1;1;1	Collagen alpha-3(VI) chain	COL6A3	Isoform 4 of Collagen alpha-3(VI) chain OS=Homo sapiens GN=COL6A3;Isoform 2 of Collagen alpha-3(VI) chain OS=Homo sapiens GN=COL6A3;Collagen alpha-3(VI) chain OS=Homo sapiens GN=COL6A3 PE=1 SV=5	3	1	1	1	0	0	0	0	0	1	0	0	0	0	0	1	0	0	0	0	0	1	0.9	0.9	0.9	278.2	2570	2570;2971;3177	0	10.344						By MS/MS	0	0	0	0	0	0.9
P12236	P12236	6	2	2	ADP/ATP translocase 3;ADP/ATP translocase 3, N-terminally processed	SLC25A6	ADP/ATP translocase 3 OS=Homo sapiens GN=SLC25A6 PE=1 SV=4	1	6	2	2	1	3	3	6	5	2	0	2	1	2	1	1	0	2	1	2	1	1	15.4	3.4	3.4	32.866	298	298	0	3.0622	By matching	By MS/MS	By MS/MS	By MS/MS	By MS/MS	By MS/MS	2.7	6	8.4	15.4	15.1	5.7
P12268;P20839-2;P20839-4;P20839;P20839-3;P20839-7;P20839-5;P20839-6	P12268;P20839-2;P20839-4;P20839;P20839-3;P20839-7;P20839-5;P20839-6	2;1;1;1;1;1;1;1	2;1;1;1;1;1;1;1	2;1;1;1;1;1;1;1	Inosine-5-monophosphate dehydrogenase 2;Inosine-5-monophosphate dehydrogenase 1	IMPDH2;IMPDH1	Inosine-5-monophosphate dehydrogenase 2 OS=Homo sapiens GN=IMPDH2 PE=1 SV=2;Isoform 2 of Inosine-5-monophosphate dehydrogenase 1 OS=Homo sapiens GN=IMPDH1;Isoform 4 of Inosine-5-monophosphate dehydrogenase 1 OS=Homo sapiens GN=IMPDH1;Inosine-5-monophos	8	2	2	2	0	1	2	1	2	2	0	1	2	1	2	2	0	1	2	1	2	2	3.9	3.9	3.9	55.804	514	514;489;509;514;563;566;589;599	0	3.1678		By matching	By MS/MS	By matching	By matching	By MS/MS	0	1.6	3.9	1.6	3.9	3.9
P12931;P12931-2;P06241-3;P06239;P06241-2;P06241;P06239-3;P07947	P12931;P12931-2;P06241-3;P06239;P06241-2;P06241;P06239-3;P07947	2;2;1;1;1;1;1;1	2;2;1;1;1;1;1;1	2;2;1;1;1;1;1;1	Proto-oncogene tyrosine-protein kinase Src;Tyrosine-protein kinase Fyn;Tyrosine-protein kinase Lck;Tyrosine-protein kinase Yes	SRC;FYN;LCK;YES1	Proto-oncogene tyrosine-protein kinase Src OS=Homo sapiens GN=SRC PE=1 SV=3;Isoform 2 of Proto-oncogene tyrosine-protein kinase Src OS=Homo sapiens GN=SRC;Isoform 3 of Tyrosine-protein kinase Fyn OS=Homo sapiens GN=FYN;Tyrosine-protein kinase Lck OS=Homo s	8	2	2	2	0	0	0	2	2	0	0	0	0	2	2	0	0	0	0	2	2	0	3.4	3.4	3.4	59.834	536	536;542;482;509;534;537;539;543	0.0046419	1.655				By MS/MS	By MS/MS		0	0	0	3.4	3.4	0
P12956-2;P12956	P12956-2;P12956	3;3	3;3	3;3	X-ray repair cross-complementing protein 6	XRCC6	Isoform 2 of X-ray repair cross-complementing protein 6 OS=Homo sapiens GN=XRCC6;X-ray repair cross-complementing protein 6 OS=Homo sapiens GN=XRCC6 PE=1 SV=2	2	3	3	3	0	0	0	1	3	1	0	0	0	1	3	1	0	0	0	1	3	1	5.5	5.5	5.5	65.148	568	568;609	0.0007278	2.1569				By MS/MS	By MS/MS	By matching	0	0	0	1.8	5.5	2.3
P13010	P13010	1	1	1	X-ray repair cross-complementing protein 5	XRCC5	X-ray repair cross-complementing protein 5 OS=Homo sapiens GN=XRCC5 PE=1 SV=3	1	1	1	1	0	0	0	1	1	0	0	0	0	1	1	0	0	0	0	1	1	0	2	2	2	82.704	732	732	0	7.1326				By MS/MS	By MS/MS		0	0	0	2	2	0
P13639;Q15029-2;Q15029-3;Q15029	P13639	10;1;1;1	10;1;1;1	10;1;1;1	Elongation factor 2	EEF2	Elongation factor 2 OS=Homo sapiens GN=EEF2 PE=1 SV=4	4	10	10	10	4	4	6	9	8	6	4	4	6	9	8	6	4	4	6	9	8	6	12.4	12.4	12.4	95.337	858	858;937;962;972	0	43.433	By MS/MS	By MS/MS	By MS/MS	By MS/MS	By MS/MS	By MS/MS	4.8	4.3	7	11.3	11.3	7
P13674-3;P13674-2;P13674	P13674-3;P13674-2;P13674	1;1;1	1;1;1	1;1;1	Prolyl 4-hydroxylase subunit alpha-1	P4HA1	Isoform 3 of Prolyl 4-hydroxylase subunit alpha-1 OS=Homo sapiens GN=P4HA1;Isoform 2 of Prolyl 4-hydroxylase subunit alpha-1 OS=Homo sapiens GN=P4HA1;Prolyl 4-hydroxylase subunit alpha-1 OS=Homo sapiens GN=P4HA1 PE=1 SV=2	3	1	1	1	0	0	0	1	1	0	0	0	0	1	1	0	0	0	0	1	1	0	2.1	2.1	2.1	58.957	516	516;534;534	0.00074239	2.2743				By MS/MS	By matching		0	0	0	2.1	2.1	0
P13688-2;P13688-8;P13688-10;P13688	P13688-2;P13688-8;P13688-10;P13688	1;1;1;1	1;1;1;1	1;1;1;1	Carcinoembryonic antigen-related cell adhesion molecule 1	CEACAM1	Isoform 2 of Carcinoembryonic antigen-related cell adhesion molecule 1 OS=Homo sapiens GN=CEACAM1;Isoform 8 of Carcinoembryonic antigen-related cell adhesion molecule 1 OS=Homo sapiens GN=CEACAM1;Isoform 10 of Carcinoembryonic antigen-related cell adhesion	4	1	1	1	0	0	0	1	1	0	0	0	0	1	1	0	0	0	0	1	1	0	3.4	3.4	3.4	45.95	417	417;464;468;526	0.0052736	1.6188				By MS/MS	By MS/MS		0	0	0	3.4	3.4	0
P13984	P13984	1	1	1	General transcription factor IIF subunit 2	GTF2F2	General transcription factor IIF subunit 2 OS=Homo sapiens GN=GTF2F2 PE=1 SV=2	1	1	1	1	0	0	0	1	1	0	0	0	0	1	1	0	0	0	0	1	1	0	4.8	4.8	4.8	28.38	249	249	0.0027267	1.7851				By MS/MS	By MS/MS		0	0	0	4.8	4.8	0
P13987	P13987	1	1	1	CD59 glycoprotein	CD59	CD59 glycoprotein OS=Homo sapiens GN=CD59 PE=1 SV=1	1	1	1	1	0	0	0	1	0	0	0	0	0	1	0	0	0	0	0	1	0	0	7.8	7.8	7.8	14.177	128	128	0.0014134	1.9904				By MS/MS			0	0	0	7.8	0	0
P14618-2;P14618;P14618-3;P30613-2;P30613	P14618-2;P14618;P14618-3	7;7;5;1;1	7;7;5;1;1	7;7;5;1;1	Pyruvate kinase PKM	PKM	Isoform M1 of Pyruvate kinase PKM OS=Homo sapiens GN=PKM;Pyruvate kinase PKM OS=Homo sapiens GN=PKM PE=1 SV=4;Isoform 3 of Pyruvate kinase PKM OS=Homo sapiens GN=PKM	5	7	7	7	3	3	3	6	6	3	3	3	3	6	6	3	3	3	3	6	6	3	13.2	13.2	13.2	58.061	531	531;531;516;543;574	0	40.732	By MS/MS	By MS/MS	By MS/MS	By MS/MS	By MS/MS	By MS/MS	5.8	5.8	5.8	11.1	11.1	5.6
P14625	P14625	2	2	2	Endoplasmin	HSP90B1	Endoplasmin OS=Homo sapiens GN=HSP90B1 PE=1 SV=1	1	2	2	2	0	0	1	2	2	0	0	0	1	2	2	0	0	0	1	2	2	0	2.4	2.4	2.4	92.468	803	803	0	2.8353			By matching	By MS/MS	By MS/MS		0	0	1.2	2.4	2.4	0
P60660-2;P60660;P14649	P60660-2;P60660;P14649	1;1;1	1;1;1	1;1;1	Myosin light polypeptide 6;Myosin light chain 6B	MYL6;MYL6B	Isoform Smooth muscle of Myosin light polypeptide 6 OS=Homo sapiens GN=MYL6;Myosin light polypeptide 6 OS=Homo sapiens GN=MYL6 PE=1 SV=2;Myosin light chain 6B OS=Homo sapiens GN=MYL6B PE=1 SV=1	3	1	1	1	0	0	0	1	0	0	0	0	0	1	0	0	0	0	0	1	0	0	8.6	8.6	8.6	16.961	151	151;151;208	0.00075472	2.3301				By MS/MS			0	0	0	8.6	0	0
P14866-2;P14866	P14866-2;P14866	3;3	3;3	3;3	Heterogeneous nuclear ribonucleoprotein L	HNRNPL	Isoform 2 of Heterogeneous nuclear ribonucleoprotein L OS=Homo sapiens GN=HNRNPL;Heterogeneous nuclear ribonucleoprotein L OS=Homo sapiens GN=HNRNPL PE=1 SV=2	2	3	3	3	0	1	1	0	0	3	0	1	1	0	0	3	0	1	1	0	0	3	13.6	13.6	13.6	50.56	456	456;589	0	27.53		By MS/MS	By MS/MS			By MS/MS	0	3.5	5.7	0	0	13.6
P14868-2;P14868	P14868-2;P14868	2;2	2;2	2;2	Aspartate--tRNA ligase, cytoplasmic	DARS	Isoform 2 of Aspartate--tRNA ligase, cytoplasmic OS=Homo sapiens GN=DARS;Aspartate--tRNA ligase, cytoplasmic OS=Homo sapiens GN=DARS PE=1 SV=2	2	2	2	2	0	0	0	2	2	0	0	0	0	2	2	0	0	0	0	2	2	0	7.7	7.7	7.7	45.771	401	401;501	0	28.206				By MS/MS	By MS/MS		0	0	0	7.7	7.7	0
P15144	P15144	2	2	2	Aminopeptidase N	ANPEP	Aminopeptidase N OS=Homo sapiens GN=ANPEP PE=1 SV=4	1	2	2	2	0	0	0	2	2	0	0	0	0	2	2	0	0	0	0	2	2	0	2.6	2.6	2.6	109.54	967	967	0	4.6966				By MS/MS	By MS/MS		0	0	0	2.6	2.6	0
P63000;P60763;P15153;P63000-2;P60953-1;Q9H4E5-2;P17081;Q9H4E5	P63000;P60763;P15153;P63000-2;P60953-1;Q9H4E5-2;P17081;Q9H4E5	2;2;2;2;1;1;1;1	1;1;1;1;0;0;0;0	1;1;1;1;0;0;0;0	Ras-related C3 botulinum toxin substrate 1;Ras-related C3 botulinum toxin substrate 3;Ras-related C3 botulinum toxin substrate 2;Cell division control protein 42 homolog;Rho-related GTP-binding protein RhoJ;Rho-related GTP-binding protein RhoQ	RAC1;RAC3;RAC2;CDC42;RHOJ;RHOQ	Ras-related C3 botulinum toxin substrate 1 OS=Homo sapiens GN=RAC1 PE=1 SV=1;Ras-related C3 botulinum toxin substrate 3 OS=Homo sapiens GN=RAC3 PE=1 SV=1;Ras-related C3 botulinum toxin substrate 2 OS=Homo sapiens GN=RAC2 PE=1 SV=1;Isoform B of Ras-related	8	2	1	1	1	2	1	2	2	2	1	1	1	1	1	1	1	1	1	1	1	1	10.9	5.2	5.2	21.45	192	192;192;192;211;191;192;205;214	0	3.1866	By MS/MS	By matching	By MS/MS	By MS/MS	By MS/MS	By MS/MS	5.2	10.9	5.2	10.9	10.9	10.9
P15880	P15880	6	6	6	40S ribosomal protein S2	RPS2	40S ribosomal protein S2 OS=Homo sapiens GN=RPS2 PE=1 SV=2	1	6	6	6	2	3	3	6	6	4	2	3	3	6	6	4	2	3	3	6	6	4	18.8	18.8	18.8	31.324	293	293	0	8.8611	By MS/MS	By MS/MS	By MS/MS	By MS/MS	By MS/MS	By MS/MS	6.5	10.2	10.2	18.8	18.8	12.6
P16070-18;P16070-12;P16070-14;P16070-13;P16070-11;P16070-10;P16070-16;P16070-8;P16070-17;P16070-6;P16070-4;P16070-3;P16070-7;P16070-5;P16070	P16070-18;P16070-12;P16070-14;P16070-13;P16070-11;P16070-10;P16070-16;P16070-8;P16070-17;P16070-6;P16070-4;P16070-3;P16070-7;P16070-5;P16070	2;2;2;2;2;2;2;2;2;2;2;2;2;2;2	2;2;2;2;2;2;2;2;2;2;2;2;2;2;2	2;2;2;2;2;2;2;2;2;2;2;2;2;2;2	CD44 antigen	CD44	Isoform 18 of CD44 antigen OS=Homo sapiens GN=CD44;Isoform 12 of CD44 antigen OS=Homo sapiens GN=CD44;Isoform 14 of CD44 antigen OS=Homo sapiens GN=CD44;Isoform 13 of CD44 antigen OS=Homo sapiens GN=CD44;Isoform 11 of CD44 antigen OS=Homo sapiens GN=CD44;I	15	2	2	2	1	0	0	2	2	0	1	0	0	2	2	0	1	0	0	2	2	0	7.1	7.1	7.1	37.277	340	340;361;396;425;429;493;668;674;691;699;699;711;713;734;742	0	14.677	By matching			By MS/MS	By MS/MS		2.4	0	0	7.1	7.1	0
P16403	P16403	20	20	8	Histone H1.2	HIST1H1C	Histone H1.2 OS=Homo sapiens GN=HIST1H1C PE=1 SV=2	1	20	20	8	16	15	17	15	15	18	16	15	17	15	15	18	6	6	7	5	5	8	44.1	44.1	15	21.364	213	213	0	107.48	By MS/MS	By MS/MS	By MS/MS	By MS/MS	By MS/MS	By MS/MS	42.3	39.9	39.9	41.3	41.3	42.7
P16615-4;P16615;P16615-5;P16615-2;P16615-3;Q93084-4;Q93084-2;Q93084-3;Q93084-7;Q93084;Q93084-6;Q93084-5;O14983-2;O14983;O14983-3	P16615-4;P16615;P16615-5;P16615-2;P16615-3	7;7;6;6;6;3;3;3;3;3;3;3;2;2;1	7;7;6;6;6;3;3;3;3;3;3;3;2;2;1	7;7;6;6;6;3;3;3;3;3;3;3;2;2;1	Sarcoplasmic/endoplasmic reticulum calcium ATPase 2	ATP2A2	Isoform 4 of Sarcoplasmic/endoplasmic reticulum calcium ATPase 2 OS=Homo sapiens GN=ATP2A2;Sarcoplasmic/endoplasmic reticulum calcium ATPase 2 OS=Homo sapiens GN=ATP2A2 PE=1 SV=1;Isoform 5 of Sarcoplasmic/endoplasmic reticulum calcium ATPase 2 OS=Homo sapi	15	7	7	7	0	1	3	7	6	1	0	1	3	7	6	1	0	1	3	7	6	1	9.1	9.1	9.1	111.85	1015	1015;1042;997;997;999;998;999;1029;1033;1043;1044;1052;994;1001;869	0	94.054		By matching	By MS/MS	By MS/MS	By MS/MS	By MS/MS	0	1.1	3.8	9.1	8.1	1.3
P16949;P16949-2	P16949;P16949-2	4;3	4;3	3;2	Stathmin	STMN1	Stathmin OS=Homo sapiens GN=STMN1 PE=1 SV=3;Isoform 2 of Stathmin OS=Homo sapiens GN=STMN1	2	4	4	3	0	2	1	0	1	3	0	2	1	0	1	3	0	1	0	0	1	2	30.9	30.9	24.8	17.302	149	149;174	0	5.0866		By MS/MS	By MS/MS		By MS/MS	By MS/MS	0	15.4	6	0	6	24.8
P48741;P17066	P48741;P17066	3;3	1;1	1;1	Putative heat shock 70 kDa protein 7;Heat shock 70 kDa protein 6	HSPA7;HSPA6	Putative heat shock 70 kDa protein 7 OS=Homo sapiens GN=HSPA7 PE=5 SV=2;Heat shock 70 kDa protein 6 OS=Homo sapiens GN=HSPA6 PE=1 SV=2	2	3	1	1	2	2	0	3	3	1	1	1	0	1	1	0	1	1	0	1	1	0	10.9	3	3	40.244	367	367;643	0	3.5355	By matching	By matching		By MS/MS	By MS/MS	By matching	6.5	6.5	0	10.9	10.9	3.5
P17096;P17096-3	P17096;P17096-3	11;10	11;10	4;4	High mobility group protein HMG-I/HMG-Y	HMGA1	High mobility group protein HMG-I/HMG-Y OS=Homo sapiens GN=HMGA1 PE=1 SV=3;Isoform HMG-R of High mobility group protein HMG-I/HMG-Y OS=Homo sapiens GN=HMGA1	2	11	11	4	10	11	11	3	5	10	10	11	11	3	5	10	4	4	4	0	1	4	61.7	61.7	23.4	11.676	107	107;179	0	109.41	By MS/MS	By MS/MS	By MS/MS	By MS/MS	By MS/MS	By MS/MS	61.7	61.7	61.7	32.7	56.1	61.7
P17096-2	P17096-2	9	2	2	High mobility group protein HMG-I/HMG-Y	HMGA1	Isoform HMG-Y of High mobility group protein HMG-I/HMG-Y OS=Homo sapiens GN=HMGA1	1	9	2	2	7	9	9	4	5	8	1	2	2	1	1	2	1	2	2	1	1	2	57.3	14.6	14.6	10.679	96	96	0	4.3204	By MS/MS	By MS/MS	By MS/MS	By MS/MS	By matching	By MS/MS	57.3	57.3	57.3	51	51	57.3
P17252	P17252	2	2	2	Protein kinase C alpha type	PRKCA	Protein kinase C alpha type OS=Homo sapiens GN=PRKCA PE=1 SV=4	1	2	2	2	0	0	0	2	2	0	0	0	0	2	2	0	0	0	0	2	2	0	4.2	4.2	4.2	76.749	672	672	0	11.068				By MS/MS	By MS/MS		0	0	0	4.2	4.2	0
P17480-2;P17480	P17480-2;P17480	1;1	1;1	1;1	Nucleolar transcription factor 1	UBTF	Isoform UBF2 of Nucleolar transcription factor 1 OS=Homo sapiens GN=UBTF;Nucleolar transcription factor 1 OS=Homo sapiens GN=UBTF PE=1 SV=1	2	1	1	1	1	1	1	0	0	1	1	1	1	0	0	1	1	1	1	0	0	1	1.7	1.7	1.7	84.936	727	727;764	0.0014337	2.075	By MS/MS	By MS/MS	By MS/MS			By MS/MS	1.7	1.7	1.7	0	0	1.7
P17706-2;P17706-4;P17706	P17706-2;P17706-4;P17706	1;1;1	1;1;1	1;1;1	Tyrosine-protein phosphatase non-receptor type 2	PTPN2	Isoform 2 of Tyrosine-protein phosphatase non-receptor type 2 OS=Homo sapiens GN=PTPN2;Isoform 4 of Tyrosine-protein phosphatase non-receptor type 2 OS=Homo sapiens GN=PTPN2;Tyrosine-protein phosphatase non-receptor type 2 OS=Homo sapiens GN=PTPN2 PE=1 SV=	3	1	1	1	0	0	0	1	1	0	0	0	0	1	1	0	0	0	0	1	1	0	3.6	3.6	3.6	45.168	387	387;410;415	0	18.425				By MS/MS	By MS/MS		0	0	0	3.6	3.6	0
P17844-2;P17844	P17844-2;P17844	7;7	7;7	5;5	Probable ATP-dependent RNA helicase DDX5	DDX5	Isoform 2 of Probable ATP-dependent RNA helicase DDX5 OS=Homo sapiens GN=DDX5;Probable ATP-dependent RNA helicase DDX5 OS=Homo sapiens GN=DDX5 PE=1 SV=1	2	7	7	5	2	2	3	7	5	2	2	2	3	7	5	2	0	1	2	5	3	2	14.2	14.2	10.1	60.563	535	535;614	0	57.818	By matching	By MS/MS	By MS/MS	By MS/MS	By MS/MS	By matching	4.1	3.6	5.6	14.2	10.3	3.4
P17858;P17858-2	P17858	3;1	3;1	3;1	ATP-dependent 6-phosphofructokinase, liver type	PFKL	ATP-dependent 6-phosphofructokinase, liver type OS=Homo sapiens GN=PFKL PE=1 SV=6	2	3	3	3	0	0	0	3	3	1	0	0	0	3	3	1	0	0	0	3	3	1	2.2	2.2	2.2	85.018	780	780;827	0	3.937				By MS/MS	By MS/MS	By MS/MS	0	0	0	2.2	2.2	1.2
P17987	P17987	7	7	7	T-complex protein 1 subunit alpha	TCP1	T-complex protein 1 subunit alpha OS=Homo sapiens GN=TCP1 PE=1 SV=1	1	7	7	7	0	0	0	7	6	1	0	0	0	7	6	1	0	0	0	7	6	1	12.9	12.9	12.9	60.343	556	556	0	24.843				By MS/MS	By MS/MS	By MS/MS	0	0	0	12.9	10.4	1.8
P18077	P18077	4	4	4	60S ribosomal protein L35a	RPL35A	60S ribosomal protein L35a OS=Homo sapiens GN=RPL35A PE=1 SV=2	1	4	4	4	1	2	2	3	3	2	1	2	2	3	3	2	1	2	2	3	3	2	22.7	22.7	22.7	12.538	110	110	0	19.637	By MS/MS	By MS/MS	By MS/MS	By MS/MS	By MS/MS	By MS/MS	10.9	19.1	19.1	14.5	14.5	19.1
P18085	P18085	1	1	1	ADP-ribosylation factor 4	ARF4	ADP-ribosylation factor 4 OS=Homo sapiens GN=ARF4 PE=1 SV=3	1	1	1	1	0	0	0	1	1	0	0	0	0	1	1	0	0	0	0	1	1	0	5.6	5.6	5.6	20.511	180	180	0.0059016	1.5695				By MS/MS	By MS/MS		0	0	0	5.6	5.6	0
P18124	P18124	10	10	10	60S ribosomal protein L7	RPL7	60S ribosomal protein L7 OS=Homo sapiens GN=RPL7 PE=1 SV=1	1	10	10	10	3	7	6	6	7	6	3	7	6	6	7	6	3	7	6	6	7	6	23.4	23.4	23.4	29.225	248	248	0	22.317	By MS/MS	By MS/MS	By MS/MS	By MS/MS	By MS/MS	By MS/MS	13.3	23.4	20.6	15.7	20.2	20.6
P18583-2;P18583-5;P18583-7;P18583;P18583-9;P18583-10;P18583-4;P18583-6;P18583-8	P18583-2;P18583-5;P18583-7;P18583;P18583-9;P18583-10;P18583-4;P18583-6	29;29;28;28;28;25;25;21;10	29;29;28;28;28;25;25;21;10	4;4;3;3;3;0;0;0;0	Protein SON	SON	Isoform A of Protein SON OS=Homo sapiens GN=SON;Isoform D of Protein SON OS=Homo sapiens GN=SON;Isoform G of Protein SON OS=Homo sapiens GN=SON;Protein SON OS=Homo sapiens GN=SON PE=1 SV=4;Isoform I of Protein SON OS=Homo sapiens GN=SON;Isoform J of Protei	9	29	29	4	15	14	15	23	25	17	15	14	15	23	25	17	3	2	2	1	2	2	15.8	15.8	1.9	232.3	2140	2140;2459;2386;2426;2466;2282;2325;2108;699	0	321.32	By MS/MS	By MS/MS	By MS/MS	By MS/MS	By MS/MS	By MS/MS	8.7	9.1	7.6	12.8	13.6	8.9
P18583-3	P18583-3	26	1	1	Protein SON	SON	Isoform B of Protein SON OS=Homo sapiens GN=SON	1	26	1	1	12	13	14	23	24	16	0	1	1	1	1	1	0	1	1	1	1	1	13.5	0.6	0.6	250.39	2303	2303	0	49.981	By matching	By matching	By matching	By MS/MS	By MS/MS	By matching	6.8	8	6.9	12.1	12.4	7.9
P18615-3;P18615;P18615-4	P18615-3;P18615;P18615-4	3;3;2	3;3;2	3;3;2	Negative elongation factor E	NELFE	Isoform 2 of Negative elongation factor E OS=Homo sapiens GN=NELFE;Negative elongation factor E OS=Homo sapiens GN=NELFE PE=1 SV=3;Isoform 3 of Negative elongation factor E OS=Homo sapiens GN=NELFE	3	3	3	3	3	3	3	1	1	3	3	3	3	1	1	3	3	3	3	1	1	3	13.2	13.2	13.2	43.924	387	387;380;350	0	117.03	By MS/MS	By MS/MS	By MS/MS	By MS/MS	By MS/MS	By MS/MS	13.2	13.2	13.2	4.7	4.7	13.2
P18621-3;P18621;P18621-2	P18621-3;P18621;P18621-2	5;5;3	5;5;3	5;5;3	60S ribosomal protein L17	RPL17	Isoform 3 of 60S ribosomal protein L17 OS=Homo sapiens GN=RPL17;60S ribosomal protein L17 OS=Homo sapiens GN=RPL17 PE=1 SV=3;Isoform 2 of 60S ribosomal protein L17 OS=Homo sapiens GN=RPL17	3	5	5	5	4	4	4	4	4	4	4	4	4	4	4	4	4	4	4	4	4	4	16.2	16.2	16.2	26.372	228	228;184;146	0	44.382	By MS/MS	By MS/MS	By MS/MS	By MS/MS	By MS/MS	By MS/MS	14.9	14.9	12.3	15.8	15.8	14.9
P18754-2;P18754	P18754-2;P18754	2;1	2;1	2;1	Regulator of chromosome condensation	RCC1	Isoform 2 of Regulator of chromosome condensation OS=Homo sapiens GN=RCC1;Regulator of chromosome condensation OS=Homo sapiens GN=RCC1 PE=1 SV=1	2	2	2	2	1	1	2	1	1	2	1	1	2	1	1	2	1	1	2	1	1	2	5.3	5.3	5.3	48.145	452	452;421	0	13.515	By matching	By matching	By MS/MS	By MS/MS	By MS/MS	By matching	2.2	3.1	5.3	2.2	2.2	5.3
P19338	P19338	21	21	21	Nucleolin	NCL	Nucleolin OS=Homo sapiens GN=NCL PE=1 SV=3	1	21	21	21	15	14	19	7	8	20	15	14	19	7	8	20	15	14	19	7	8	20	25.2	25.2	25.2	76.613	710	710	0	134.47	By MS/MS	By MS/MS	By MS/MS	By MS/MS	By MS/MS	By MS/MS	19.4	17.5	23.5	9.2	10.8	23.4
P19367-4;P19367-2;P19367;P19367-3	P19367-4;P19367-2;P19367;P19367-3	3;3;3;3	3;3;3;3	3;3;3;3	Hexokinase-1	HK1	Isoform 4 of Hexokinase-1 OS=Homo sapiens GN=HK1;Isoform 2 of Hexokinase-1 OS=Homo sapiens GN=HK1;Hexokinase-1 OS=Homo sapiens GN=HK1 PE=1 SV=3;Isoform 3 of Hexokinase-1 OS=Homo sapiens GN=HK1	4	3	3	3	0	0	1	2	1	0	0	0	1	2	1	0	0	0	1	2	1	0	3.4	3.4	3.4	101.08	905	905;916;917;921	0	4.8792			By MS/MS	By MS/MS	By MS/MS		0	0	1	2.4	1.2	0
P19447	P19447	3	3	3	TFIIH basal transcription factor complex helicase XPB subunit	ERCC3	TFIIH basal transcription factor complex helicase XPB subunit OS=Homo sapiens GN=ERCC3 PE=1 SV=1	1	3	3	3	0	0	0	2	3	0	0	0	0	2	3	0	0	0	0	2	3	0	4.6	4.6	4.6	89.277	782	782	0	4.0117				By MS/MS	By MS/MS		0	0	0	3.1	4.6	0
P19525-2;P19525	P19525-2;P19525	1;1	1;1	1;1	Interferon-induced, double-stranded RNA-activated protein kinase	EIF2AK2	Isoform 2 of Interferon-induced, double-stranded RNA-activated protein kinase OS=Homo sapiens GN=EIF2AK2;Interferon-induced, double-stranded RNA-activated protein kinase OS=Homo sapiens GN=EIF2AK2 PE=1 SV=2	2	1	1	1	0	0	0	1	1	0	0	0	0	1	1	0	0	0	0	1	1	0	2.7	2.7	2.7	57.39	510	510;551	0	6.6847				By MS/MS	By MS/MS		0	0	0	2.7	2.7	0
P20020;P20020-5;P20020-4;P20020-3;P20020-6;P20020-2;Q16720-3;Q16720-5;P23634-2;P23634-3;Q16720-2;P23634-5;Q16720-6;P23634-7;P23634-6;Q16720-4;Q16720;P23634-4;P23634-8;P23634;Q16720-7;Q16720-8	P20020;P20020-5;P20020-4;P20020-3;P20020-6;P20020-2;Q16720-3;Q16720-5;P23634-2;P23634-3;Q16720-2;P23634-5;Q16720-6;P23634-7;P23634-6;Q16720-4;Q16720;P23634-4;P23634-8;P23634;Q16720-7;Q16720-8	3;3;3;3;3;3;2;2;2;2;2;2;2;2;2;2;2;2;2;2;2;2	3;3;3;3;3;3;2;2;2;2;2;2;2;2;2;2;2;2;2;2;2;2	1;1;1;1;1;1;0;0;0;0;0;0;0;0;0;0;0;0;0;0;0;0	Plasma membrane calcium-transporting ATPase 1;Plasma membrane calcium-transporting ATPase 3;Plasma membrane calcium-transporting ATPase 4	ATP2B1;ATP2B3;ATP2B4	Plasma membrane calcium-transporting ATPase 1 OS=Homo sapiens GN=ATP2B1 PE=1 SV=3;Isoform E of Plasma membrane calcium-transporting ATPase 1 OS=Homo sapiens GN=ATP2B1;Isoform C of Plasma membrane calcium-transporting ATPase 1 OS=Homo sapiens GN=ATP2B1;Isof	22	3	3	1	0	0	1	3	3	1	0	0	1	3	3	1	0	0	0	1	1	0	3.1	3.1	0.9	138.75	1258	1258;1171;1249;1220;1184;1176;1159;1168;1170;1158;1173;1122;1154;1193;1205;1206;1220;1134;1229;1241;1129;1115	0	8.2511			By MS/MS	By MS/MS	By MS/MS	By matching	0	0	0.9	3.1	3.1	0.9
P20042	P20042	6	6	6	Eukaryotic translation initiation factor 2 subunit 2	EIF2S2	Eukaryotic translation initiation factor 2 subunit 2 OS=Homo sapiens GN=EIF2S2 PE=1 SV=2	1	6	6	6	2	3	3	4	4	4	2	3	3	4	4	4	2	3	3	4	4	4	18.9	18.9	18.9	38.388	333	333	0	15.973	By MS/MS	By MS/MS	By MS/MS	By MS/MS	By MS/MS	By MS/MS	8.4	12	12	12	12	14.7
P20339-2;P20339	P20339-2;P20339	1;1	1;1	1;1	Ras-related protein Rab-5A	RAB5A	Isoform 2 of Ras-related protein Rab-5A OS=Homo sapiens GN=RAB5A;Ras-related protein Rab-5A OS=Homo sapiens GN=RAB5A PE=1 SV=2	2	1	1	1	0	0	0	1	1	0	0	0	0	1	1	0	0	0	0	1	1	0	6	6	6	22.178	201	201;215	0.0046388	1.6467				By MS/MS	By MS/MS		0	0	0	6	6	0
P20340-3;P20340-2;P20340	P20340-3;P20340-2;P20340	1;1;1	1;1;1	1;1;1	Ras-related protein Rab-6A	RAB6A	Isoform 3 of Ras-related protein Rab-6A OS=Homo sapiens GN=RAB6A;Isoform 2 of Ras-related protein Rab-6A OS=Homo sapiens GN=RAB6A;Ras-related protein Rab-6A OS=Homo sapiens GN=RAB6A PE=1 SV=3	3	1	1	1	1	1	0	1	1	0	1	1	0	1	1	0	1	1	0	1	1	0	11.5	11.5	11.5	11.715	104	104;208;208	0.004698	1.683	By matching	By matching		By MS/MS	By MS/MS		11.5	11.5	0	11.5	11.5	0
P20700	P20700	8	8	8	Lamin-B1	LMNB1	Lamin-B1 OS=Homo sapiens GN=LMNB1 PE=1 SV=2	1	8	8	8	0	1	1	8	7	1	0	1	1	8	7	1	0	1	1	8	7	1	15.4	15.4	15.4	66.408	586	586	0	51.573		By MS/MS	By MS/MS	By MS/MS	By MS/MS	By MS/MS	0	2	2	15.4	13.7	2
P20810-9;P20810-5;P20810-10;P20810-7;P20810-6	P20810-9;P20810-5;P20810-10;P20810-7;P20810-6	10;10;10;10;10	10;10;10;10;10	4;4;4;4;4	Calpastatin	CAST	Isoform 9 of Calpastatin OS=Homo sapiens GN=CAST;Isoform 5 of Calpastatin OS=Homo sapiens GN=CAST;Isoform 10 of Calpastatin OS=Homo sapiens GN=CAST;Isoform 7 of Calpastatin OS=Homo sapiens GN=CAST;Isoform 6 of Calpastatin OS=Homo sapiens GN=CAST	5	10	10	4	7	8	10	0	2	6	7	8	10	0	2	6	2	3	4	0	1	1	16	16	4.8	80.264	750	750;756;769;772;791	0	22.34	By MS/MS	By MS/MS	By MS/MS		By matching	By MS/MS	12.5	14	16	0	3.5	11.1
P21127;P21127-2;P21127-3;P21127-8;Q9UQ88-4;Q9UQ88;Q9UQ88-2;Q9UQ88-3;P21127-9;P21127-6;P21127-10;P21127-5;P21127-4;P21127-12;Q9UQ88-10;Q9UQ88-9;Q9UQ88-5;Q13882	P21127;P21127-2;P21127-3;P21127-8;Q9UQ88-4;Q9UQ88;Q9UQ88-2;Q9UQ88-3;P21127-9;P21127-6;P21127-10;P21127-5;P21127-4;P21127-12;Q9UQ88-10	14;14;14;14;13;13;13;13;10;10;8;8;8;8;7;6;6;1	14;14;14;14;13;13;13;13;10;10;8;8;8;8;7;6;6;1	14;14;14;14;13;13;13;13;10;10;8;8;8;8;7;6;6;1	Cyclin-dependent kinase 11B;Cyclin-dependent kinase 11A	CDK11B;CDK11A	Cyclin-dependent kinase 11B OS=Homo sapiens GN=CDK11B PE=1 SV=3;Isoform SV1 of Cyclin-dependent kinase 11B OS=Homo sapiens GN=CDK11B;Isoform 2 of Cyclin-dependent kinase 11B OS=Homo sapiens GN=CDK11B;Isoform 8 of Cyclin-dependent kinase 11B OS=Homo sapiens	18	14	14	14	9	11	10	1	3	12	9	11	10	1	3	12	9	11	10	1	3	12	15.1	15.1	15.1	92.706	795	795;782;781;772;770;783;780;779;748;738;565;526;461;439;439;531;397;451	0	32.611	By MS/MS	By MS/MS	By MS/MS	By matching	By MS/MS	By MS/MS	10.4	10.6	9.6	1	3.3	11.8
P21291	P21291	2	2	2	Cysteine and glycine-rich protein 1	CSRP1	Cysteine and glycine-rich protein 1 OS=Homo sapiens GN=CSRP1 PE=1 SV=3	1	2	2	2	1	2	2	0	1	2	1	2	2	0	1	2	1	2	2	0	1	2	14	14	14	20.567	193	193	0	8.2125	By MS/MS	By MS/MS	By MS/MS		By matching	By MS/MS	5.2	14	14	0	8.8	14
P21333-2;P21333	P21333-2;P21333	12;12	12;12	12;12	Filamin-A	FLNA	Isoform 2 of Filamin-A OS=Homo sapiens GN=FLNA;Filamin-A OS=Homo sapiens GN=FLNA PE=1 SV=4	2	12	12	12	6	8	6	7	9	7	6	8	6	7	9	7	6	8	6	7	9	7	7	7	7	280.01	2639	2639;2647	0	73.908	By MS/MS	By MS/MS	By MS/MS	By MS/MS	By MS/MS	By MS/MS	3.5	4.5	3.1	3.8	5.3	4.1
P21359-2;P21359-6;P21359;P21359-4;P21359-3;P21359-5	P21359-2;P21359-6;P21359;P21359-4	4;4;4;2;1;1	4;4;4;2;1;1	4;4;4;2;1;1	Neurofibromin;Neurofibromin truncated	NF1	Isoform 1 of Neurofibromin OS=Homo sapiens GN=NF1;Isoform 6 of Neurofibromin OS=Homo sapiens GN=NF1;Neurofibromin OS=Homo sapiens GN=NF1 PE=1 SV=2;Isoform 4 of Neurofibromin OS=Homo sapiens GN=NF1	6	4	4	4	0	0	0	4	4	0	0	0	0	4	4	0	0	0	0	4	4	0	2	2	2	317.03	2818	2818;2836;2839;1598;551;593	0	42.096				By MS/MS	By MS/MS		0	0	0	2	2	0
P21741;P21741-2	P21741;P21741-2	2;1	2;1	2;1	Midkine	MDK	Midkine OS=Homo sapiens GN=MDK PE=1 SV=1;Isoform 2 of Midkine OS=Homo sapiens GN=MDK	2	2	2	2	0	1	1	0	0	2	0	1	1	0	0	2	0	1	1	0	0	2	21	21	21	15.585	143	143;87	0	11.276		By MS/MS	By MS/MS			By MS/MS	0	7	7	0	0	21
P21796	P21796	3	3	3	Voltage-dependent anion-selective channel protein 1	VDAC1	Voltage-dependent anion-selective channel protein 1 OS=Homo sapiens GN=VDAC1 PE=1 SV=2	1	3	3	3	0	0	0	3	2	1	0	0	0	3	2	1	0	0	0	3	2	1	13.8	13.8	13.8	30.772	283	283	0	10.756				By MS/MS	By MS/MS	By matching	0	0	0	13.8	13.8	4.2
P21980;P21980-2	P21980;P21980-2	2;1	2;1	2;1	Protein-glutamine gamma-glutamyltransferase 2	TGM2	Protein-glutamine gamma-glutamyltransferase 2 OS=Homo sapiens GN=TGM2 PE=1 SV=2;Isoform 2 of Protein-glutamine gamma-glutamyltransferase 2 OS=Homo sapiens GN=TGM2	2	2	2	2	0	0	0	2	2	0	0	0	0	2	2	0	0	0	0	2	2	0	3.3	3.3	3.3	77.328	687	687;548	0	3.9623				By MS/MS	By MS/MS		0	0	0	3.3	3.3	0
Q8TD47;P22090	Q8TD47;P22090	4;4	1;1	1;1	40S ribosomal protein S4, Y isoform 2;40S ribosomal protein S4, Y isoform 1	RPS4Y2;RPS4Y1	40S ribosomal protein S4, Y isoform 2 OS=Homo sapiens GN=RPS4Y2 PE=2 SV=3;40S ribosomal protein S4, Y isoform 1 OS=Homo sapiens GN=RPS4Y1 PE=1 SV=2	2	4	1	1	2	2	3	4	4	1	0	0	0	1	1	0	0	0	0	1	1	0	12.5	4.9	4.9	29.295	263	263;263	0	34.433	By matching	By matching	By matching	By MS/MS	By MS/MS	By matching	7.2	7.2	7.6	12.5	12.5	3.4
P22102-2;P22102	P22102-2;P22102	2;2	2;2	2;2	Trifunctional purine biosynthetic protein adenosine-3;Phosphoribosylamine--glycine ligase;Phosphoribosylformylglycinamidine cyclo-ligase;Phosphoribosylglycinamide formyltransferase	GART	Isoform Short of Trifunctional purine biosynthetic protein adenosine-3 OS=Homo sapiens GN=GART;Trifunctional purine biosynthetic protein adenosine-3 OS=Homo sapiens GN=GART PE=1 SV=1	2	2	2	2	0	0	1	2	2	0	0	0	1	2	2	0	0	0	1	2	2	0	5.8	5.8	5.8	46.033	433	433;1010	0	3.824			By matching	By MS/MS	By MS/MS		0	0	3.7	5.8	5.8	0
P22234;P22234-2	P22234;P22234-2	1;1	1;1	1;1	Multifunctional protein ADE2;Phosphoribosylaminoimidazole-succinocarboxamide synthase;Phosphoribosylaminoimidazole carboxylase	PAICS	Multifunctional protein ADE2 OS=Homo sapiens GN=PAICS PE=1 SV=3;Isoform 2 of Multifunctional protein ADE2 OS=Homo sapiens GN=PAICS	2	1	1	1	0	1	1	1	0	1	0	1	1	1	0	1	0	1	1	1	0	1	2.6	2.6	2.6	47.079	425	425;432	0.007767	1.4854		By MS/MS	By MS/MS	By MS/MS		By matching	0	2.6	2.6	2.6	0	2.6
P22314-2;P22314	P22314-2;P22314	2;2	2;2	2;2	Ubiquitin-like modifier-activating enzyme 1	UBA1	Isoform 2 of Ubiquitin-like modifier-activating enzyme 1 OS=Homo sapiens GN=UBA1;Ubiquitin-like modifier-activating enzyme 1 OS=Homo sapiens GN=UBA1 PE=1 SV=3	2	2	2	2	0	0	0	2	1	0	0	0	0	2	1	0	0	0	0	2	1	0	2.7	2.7	2.7	113.8	1018	1018;1058	0	4.0767				By MS/MS	By MS/MS		0	0	0	2.7	1.3	0
P35321;P22528	P35321;P22528	1;1	1;1	1;1	Cornifin-A;Cornifin-B	SPRR1A;SPRR1B	Cornifin-A OS=Homo sapiens GN=SPRR1A PE=1 SV=2;Cornifin-B OS=Homo sapiens GN=SPRR1B PE=1 SV=2	2	1	1	1	0	0	0	0	1	0	0	0	0	0	1	0	0	0	0	0	1	0	15.7	15.7	15.7	9.8774	89	89;89	0.0014144	1.9993					By MS/MS		0	0	0	0	15.7	0
P22531;Q96RM1;P35326;P35325;P22532;Q9BYE4	P22531;Q96RM1;P35326;P35325;P22532;Q9BYE4	3;2;2;2;2;2	3;2;2;2;2;2	3;2;2;2;2;2	Small proline-rich protein 2E;Small proline-rich protein 2F;Small proline-rich protein 2A;Small proline-rich protein 2B;Small proline-rich protein 2D;Small proline-rich protein 2G	SPRR2E;SPRR2F;SPRR2A;SPRR2B;SPRR2D;SPRR2G	Small proline-rich protein 2E OS=Homo sapiens GN=SPRR2E PE=2 SV=2;Small proline-rich protein 2F OS=Homo sapiens GN=SPRR2F PE=3 SV=1;Small proline-rich protein 2A OS=Homo sapiens GN=SPRR2A PE=1 SV=1;Small proline-rich protein 2B OS=Homo sapiens GN=SPRR2B PE	6	3	3	3	0	0	0	0	3	0	0	0	0	0	3	0	0	0	0	0	3	0	61.1	61.1	61.1	7.8553	72	72;72;72;72;72;73	0	5.2436					By MS/MS		0	0	0	0	61.1	0
P22626-2;P22626	P22626-2;P22626	6;6	6;6	6;6	Heterogeneous nuclear ribonucleoproteins A2/B1	HNRNPA2B1	Isoform A2 of Heterogeneous nuclear ribonucleoproteins A2/B1 OS=Homo sapiens GN=HNRNPA2B1;Heterogeneous nuclear ribonucleoproteins A2/B1 OS=Homo sapiens GN=HNRNPA2B1 PE=1 SV=2	2	6	6	6	4	5	5	6	5	5	4	5	5	6	5	5	4	5	5	6	5	5	23.8	23.8	23.8	36.006	341	341;353	0	41.393	By MS/MS	By MS/MS	By MS/MS	By MS/MS	By MS/MS	By MS/MS	18.5	21.4	21.4	23.8	21.4	21.4
P22695	P22695	1	1	1	Cytochrome b-c1 complex subunit 2, mitochondrial	UQCRC2	Cytochrome b-c1 complex subunit 2, mitochondrial OS=Homo sapiens GN=UQCRC2 PE=1 SV=3	1	1	1	1	0	1	0	1	1	0	0	1	0	1	1	0	0	1	0	1	1	0	3.5	3.5	3.5	48.442	453	453	0	2.7072		By matching		By MS/MS	By MS/MS		0	3.5	0	3.5	3.5	0
P23246;P23246-2	P23246;P23246-2	5;4	5;4	5;4	Splicing factor, proline- and glutamine-rich	SFPQ	Splicing factor, proline- and glutamine-rich OS=Homo sapiens GN=SFPQ PE=1 SV=2;Isoform Short of Splicing factor, proline- and glutamine-rich OS=Homo sapiens GN=SFPQ	2	5	5	5	0	0	1	4	5	1	0	0	1	4	5	1	0	0	1	4	5	1	7.8	7.8	7.8	76.149	707	707;669	0	7.392			By MS/MS	By MS/MS	By MS/MS	By MS/MS	0	0	2.1	6.2	7.8	2.1
P23284	P23284	7	7	7	Peptidyl-prolyl cis-trans isomerase B	PPIB	Peptidyl-prolyl cis-trans isomerase B OS=Homo sapiens GN=PPIB PE=1 SV=2	1	7	7	7	6	4	5	1	1	5	6	4	5	1	1	5	6	4	5	1	1	5	35.2	35.2	35.2	23.742	216	216	0	58.822	By MS/MS	By MS/MS	By MS/MS	By MS/MS	By MS/MS	By MS/MS	28.7	17.1	22.7	3.7	3.2	25.9
P23396;P23396-2	P23396;P23396-2	5;5	5;5	5;5	40S ribosomal protein S3	RPS3	40S ribosomal protein S3 OS=Homo sapiens GN=RPS3 PE=1 SV=2;Isoform 2 of 40S ribosomal protein S3 OS=Homo sapiens GN=RPS3	2	5	5	5	2	2	2	4	5	2	2	2	2	4	5	2	2	2	2	4	5	2	25.1	25.1	25.1	26.688	243	243;259	0	55.459	By MS/MS	By MS/MS	By MS/MS	By MS/MS	By MS/MS	By MS/MS	10.7	11.9	11.9	20.2	25.1	11.9
P23497;P23497-3;P23497-4	P23497;P23497-3;P23497-4	2;1;1	1;1;1	1;1;1	Nuclear autoantigen Sp-100	SP100	Nuclear autoantigen Sp-100 OS=Homo sapiens GN=SP100 PE=1 SV=3;Isoform Sp100-B of Nuclear autoantigen Sp-100 OS=Homo sapiens GN=SP100;Isoform Sp100-C of Nuclear autoantigen Sp-100 OS=Homo sapiens GN=SP100	3	2	1	1	1	2	2	0	0	2	0	1	1	0	0	1	0	1	1	0	0	1	2.3	1.4	1.4	100.42	879	879;688;885	0.0027397	1.8081	By matching	By MS/MS	By matching			By MS/MS	0.9	2.3	2.3	0	0	2.3
P23528;Q9Y281-3	P23528;Q9Y281-3	2;1	2;1	1;0	Cofilin-1;Cofilin-2	CFL1;CFL2	Cofilin-1 OS=Homo sapiens GN=CFL1 PE=1 SV=3;Isoform 3 of Cofilin-2 OS=Homo sapiens GN=CFL2	2	2	2	1	2	2	2	2	2	2	2	2	2	2	2	2	1	1	1	1	1	1	13.9	13.9	7.2	18.502	166	166;149	0	14.593	By MS/MS	By MS/MS	By MS/MS	By MS/MS	By MS/MS	By MS/MS	13.9	13.9	13.9	13.9	13.9	13.9
P23588-2;P23588	P23588-2;P23588	8;8	8;8	8;8	Eukaryotic translation initiation factor 4B	EIF4B	Isoform 2 of Eukaryotic translation initiation factor 4B OS=Homo sapiens GN=EIF4B;Eukaryotic translation initiation factor 4B OS=Homo sapiens GN=EIF4B PE=1 SV=2	2	8	8	8	7	5	5	4	6	6	7	5	5	4	6	6	7	5	5	4	6	6	16.4	16.4	16.4	64.805	572	572;611	0	269.22	By MS/MS	By MS/MS	By MS/MS	By MS/MS	By MS/MS	By MS/MS	16.1	8.6	11.5	9.1	11.5	14
P24666-4;P24666	P24666-4;P24666	1;1	1;1	1;1	Low molecular weight phosphotyrosine protein phosphatase	ACP1	Isoform 4 of Low molecular weight phosphotyrosine protein phosphatase OS=Homo sapiens GN=ACP1;Low molecular weight phosphotyrosine protein phosphatase OS=Homo sapiens GN=ACP1 PE=1 SV=3	2	1	1	1	0	0	0	1	1	0	0	0	0	1	1	0	0	0	0	1	1	0	16.1	16.1	16.1	12.23	112	112;158	0	8.8804				By MS/MS	By MS/MS		0	0	0	16.1	16.1	0
P24928	P24928	6	6	6	DNA-directed RNA polymerase II subunit RPB1	POLR2A	DNA-directed RNA polymerase II subunit RPB1 OS=Homo sapiens GN=POLR2A PE=1 SV=2	1	6	6	6	4	5	3	1	2	4	4	5	3	1	2	4	4	5	3	1	2	4	5.3	5.3	5.3	217.17	1970	1970	0	26.746	By MS/MS	By MS/MS	By MS/MS	By matching	By matching	By MS/MS	3.7	4.6	3.2	0.5	2.1	4
P24941-2;P24941	P24941-2;P24941	4;4	2;2	2;2	Cyclin-dependent kinase 2	CDK2	Isoform 2 of Cyclin-dependent kinase 2 OS=Homo sapiens GN=CDK2;Cyclin-dependent kinase 2 OS=Homo sapiens GN=CDK2 PE=1 SV=2	2	4	2	2	2	0	1	3	3	2	1	0	0	2	2	0	1	0	0	2	2	0	15.9	8.7	8.7	30.035	264	264;298	0	3.8116	By matching		By matching	By MS/MS	By MS/MS	By matching	6.4	0	3	12.9	12.9	7.2
P25054-2;P25054-3;P25054	P25054-2;P25054-3;P25054	2;2;2	2;2;2	2;2;2	Adenomatous polyposis coli protein	APC	Isoform 2 of Adenomatous polyposis coli protein OS=Homo sapiens GN=APC;Isoform 1B of Adenomatous polyposis coli protein OS=Homo sapiens GN=APC;Adenomatous polyposis coli protein OS=Homo sapiens GN=APC PE=1 SV=2	3	2	2	2	1	0	1	0	0	1	1	0	1	0	0	1	1	0	1	0	0	1	1.1	1.1	1.1	300.44	2742	2742;2825;2843	0	2.6547	By MS/MS		By matching			By MS/MS	0.5	0	0.6	0	0	0.6
P25205;P25205-2	P25205;P25205-2	1;1	1;1	1;1	DNA replication licensing factor MCM3	MCM3	DNA replication licensing factor MCM3 OS=Homo sapiens GN=MCM3 PE=1 SV=3;Isoform 2 of DNA replication licensing factor MCM3 OS=Homo sapiens GN=MCM3	2	1	1	1	0	0	0	1	1	0	0	0	0	1	1	0	0	0	0	1	1	0	2.5	2.5	2.5	90.98	808	808;853	0	21.671				By MS/MS	By MS/MS		0	0	0	2.5	2.5	0
P25440-4;P25440-3;P25440;P25440-2	P25440-4;P25440-3;P25440;P25440-2	15;14;14;13	14;13;13;12	14;13;13;12	Bromodomain-containing protein 2	BRD2	Isoform 4 of Bromodomain-containing protein 2 OS=Homo sapiens GN=BRD2;Isoform 3 of Bromodomain-containing protein 2 OS=Homo sapiens GN=BRD2;Bromodomain-containing protein 2 OS=Homo sapiens GN=BRD2 PE=1 SV=2;Isoform 2 of Bromodomain-containing protein 2 OS=	4	15	14	14	12	13	9	0	1	13	11	12	9	0	1	12	11	12	9	0	1	12	23.9	22	22	74.88	681	681;754;801;836	0	172.58	By MS/MS	By MS/MS	By MS/MS		By matching	By MS/MS	23.5	23.3	18.5	0	1.8	22.8
P25490	P25490	1	1	1	Transcriptional repressor protein YY1	YY1	Transcriptional repressor protein YY1 OS=Homo sapiens GN=YY1 PE=1 SV=2	1	1	1	1	1	1	1	0	0	0	1	1	1	0	0	0	1	1	1	0	0	0	4.8	4.8	4.8	44.712	414	414	0	2.6895	By matching	By MS/MS	By MS/MS				4.8	4.8	4.8	0	0	0
P25705-2;P25705;P25705-3	P25705-2;P25705;P25705-3	7;7;5	7;7;5	7;7;5	ATP synthase subunit alpha, mitochondrial	ATP5A1	Isoform 2 of ATP synthase subunit alpha, mitochondrial OS=Homo sapiens GN=ATP5A1;ATP synthase subunit alpha, mitochondrial OS=Homo sapiens GN=ATP5A1 PE=1 SV=1;Isoform 3 of ATP synthase subunit alpha, mitochondrial OS=Homo sapiens GN=ATP5A1	3	7	7	7	0	2	2	6	5	2	0	2	2	6	5	2	0	2	2	6	5	2	13.9	13.9	13.9	54.493	503	503;553;531	0	16.25		By MS/MS	By MS/MS	By MS/MS	By MS/MS	By MS/MS	0	3.4	4.4	12.5	9.5	3.4
P26006;P26006-1	P26006;P26006-1	2;1	2;1	2;1	Integrin alpha-3;Integrin alpha-3 heavy chain;Integrin alpha-3 light chain	ITGA3	Integrin alpha-3 OS=Homo sapiens GN=ITGA3 PE=1 SV=5;Isoform 2 of Integrin alpha-3 OS=Homo sapiens GN=ITGA3	2	2	2	2	0	0	0	1	1	0	0	0	0	1	1	0	0	0	0	1	1	0	3	3	3	116.61	1051	1051;1066	0	2.5575				By MS/MS	By MS/MS		0	0	0	1.8	1.2	0
P26038;P35241-4;P35241;P35241-5	P26038	9;1;1;1	9;1;1;1	8;0;0;0	Moesin	MSN	Moesin OS=Homo sapiens GN=MSN PE=1 SV=3	4	9	9	8	3	2	3	7	8	2	3	2	3	7	8	2	3	2	3	6	7	2	17.2	17.2	15.3	67.819	577	577;447;583;604	0	54.207	By MS/MS	By matching	By MS/MS	By MS/MS	By MS/MS	By MS/MS	4.9	3.1	5.4	10.4	15.8	3.1
P26358-2;P26358;P26358-3	P26358-2;P26358;P26358-3	3;3;2	3;3;2	3;3;2	DNA (cytosine-5)-methyltransferase 1	DNMT1	Isoform 2 of DNA (cytosine-5)-methyltransferase 1 OS=Homo sapiens GN=DNMT1;DNA (cytosine-5)-methyltransferase 1 OS=Homo sapiens GN=DNMT1 PE=1 SV=2;Isoform 3 of DNA (cytosine-5)-methyltransferase 1 OS=Homo sapiens GN=DNMT1	3	3	3	3	1	2	3	1	3	3	1	2	3	1	3	3	1	2	3	1	3	3	2.8	2.8	2.8	184.82	1632	1632;1616;1280	0	18.671	By MS/MS	By MS/MS	By MS/MS	By matching	By MS/MS	By MS/MS	0.9	2	2.8	1.1	2.8	2.8
P26368-2;P26368	P26368-2;P26368	4;4	4;4	4;4	Splicing factor U2AF 65 kDa subunit	U2AF2	Isoform 2 of Splicing factor U2AF 65 kDa subunit OS=Homo sapiens GN=U2AF2;Splicing factor U2AF 65 kDa subunit OS=Homo sapiens GN=U2AF2 PE=1 SV=4	2	4	4	4	4	4	4	0	0	4	4	4	4	0	0	4	4	4	4	0	0	4	9.1	9.1	9.1	53.12	471	471;475	0	9.428	By MS/MS	By MS/MS	By MS/MS			By MS/MS	9.1	9.1	9.1	0	0	9.1
P26373;P26373-2	P26373;P26373-2	13;10	13;10	13;10	60S ribosomal protein L13	RPL13	60S ribosomal protein L13 OS=Homo sapiens GN=RPL13 PE=1 SV=4;Isoform 2 of 60S ribosomal protein L13 OS=Homo sapiens GN=RPL13	2	13	13	13	4	7	8	11	12	8	4	7	8	11	12	8	4	7	8	11	12	8	46	46	46	24.261	211	211;164	0	98.628	By MS/MS	By MS/MS	By MS/MS	By MS/MS	By MS/MS	By MS/MS	17.1	25.6	31.8	37.4	41.2	35.1
P26583	P26583	5	5	5	High mobility group protein B2	HMGB2	High mobility group protein B2 OS=Homo sapiens GN=HMGB2 PE=1 SV=2	1	5	5	5	2	3	3	0	0	4	2	3	3	0	0	4	2	3	3	0	0	4	31.6	31.6	31.6	24.033	209	209	0	21.235	By MS/MS	By MS/MS	By MS/MS			By MS/MS	11.5	24.4	24.4	0	0	18.7
P26599;P26599-2;P26599-3	P26599;P26599-2;P26599-3	2;2;2	2;2;2	2;2;2	Polypyrimidine tract-binding protein 1	PTBP1	Polypyrimidine tract-binding protein 1 OS=Homo sapiens GN=PTBP1 PE=1 SV=1;Isoform 2 of Polypyrimidine tract-binding protein 1 OS=Homo sapiens GN=PTBP1;Isoform 3 of Polypyrimidine tract-binding protein 1 OS=Homo sapiens GN=PTBP1	3	2	2	2	0	0	0	2	2	0	0	0	0	2	2	0	0	0	0	2	2	0	3.8	3.8	3.8	57.221	531	531;550;557	0	3.4522				By MS/MS	By MS/MS		0	0	0	3.8	3.8	0
P26640	P26640	2	2	2	Valine--tRNA ligase	VARS	Valine--tRNA ligase OS=Homo sapiens GN=VARS PE=1 SV=4	1	2	2	2	0	1	1	2	2	0	0	1	1	2	2	0	0	1	1	2	2	0	2	2	2	140.47	1264	1264	0	3.1984		By matching	By matching	By MS/MS	By MS/MS		0	0.9	0.9	2	2	0
P26641;P26641-2	P26641;P26641-2	3;3	3;3	3;3	Elongation factor 1-gamma	EEF1G	Elongation factor 1-gamma OS=Homo sapiens GN=EEF1G PE=1 SV=3;Isoform 2 of Elongation factor 1-gamma OS=Homo sapiens GN=EEF1G	2	3	3	3	0	0	1	2	2	0	0	0	1	2	2	0	0	0	1	2	2	0	8.2	8.2	8.2	50.118	437	437;487	0	9.6252			By MS/MS	By MS/MS	By MS/MS		0	0	3	5.3	8	0
P27348	P27348	3	3	3	14-3-3 protein theta	YWHAQ	14-3-3 protein theta OS=Homo sapiens GN=YWHAQ PE=1 SV=1	1	3	3	3	0	1	0	3	3	1	0	1	0	3	3	1	0	1	0	3	3	1	13.9	13.9	13.9	27.764	245	245	0	15.686		By matching		By MS/MS	By MS/MS	By matching	0	3.7	0	13.9	13.9	3.7
P27448-8;P27448-3;P27448-4;P27448-2;P27448	P27448-8;P27448-3;P27448-4;P27448-2;P27448	1;1;1;1;1	1;1;1;1;1	1;1;1;1;1	MAP/microtubule affinity-regulating kinase 3	MARK3	Isoform 7 of MAP/microtubule affinity-regulating kinase 3 OS=Homo sapiens GN=MARK3;Isoform 3 of MAP/microtubule affinity-regulating kinase 3 OS=Homo sapiens GN=MARK3;Isoform 4 of MAP/microtubule affinity-regulating kinase 3 OS=Homo sapiens GN=MARK3;Isoform	5	1	1	1	0	0	0	1	1	0	0	0	0	1	1	0	0	0	0	1	1	0	2.9	2.9	2.9	74.15	659	659;729;744;752;753	0	95.105				By MS/MS	By MS/MS		0	0	0	2.9	2.9	0
P27695	P27695	9	9	9	DNA-(apurinic or apyrimidinic site) lyase;DNA-(apurinic or apyrimidinic site) lyase, mitochondrial	APEX1	DNA-(apurinic or apyrimidinic site) lyase OS=Homo sapiens GN=APEX1 PE=1 SV=2	1	9	9	9	8	7	7	0	1	7	8	7	7	0	1	7	8	7	7	0	1	7	27.4	27.4	27.4	35.554	318	318	0	50.838	By MS/MS	By MS/MS	By MS/MS		By matching	By MS/MS	23.3	19.8	19.2	0	5.3	19.8
P27708	P27708	2	2	2	CAD protein;Glutamine-dependent carbamoyl-phosphate synthase;Aspartate carbamoyltransferase;Dihydroorotase	CAD	CAD protein OS=Homo sapiens GN=CAD PE=1 SV=3	1	2	2	2	0	0	0	2	1	0	0	0	0	2	1	0	0	0	0	2	1	0	1.3	1.3	1.3	242.98	2225	2225	0	4.4851				By MS/MS	By MS/MS		0	0	0	1.3	0.6	0
P27816;P27816-6;P27816-2	P27816;P27816-6;P27816-2	18;17;16	18;17;16	2;2;1	Microtubule-associated protein 4	MAP4	Microtubule-associated protein 4 OS=Homo sapiens GN=MAP4 PE=1 SV=3;Isoform 6 of Microtubule-associated protein 4 OS=Homo sapiens GN=MAP4;Isoform 2 of Microtubule-associated protein 4 OS=Homo sapiens GN=MAP4	3	18	18	2	8	11	10	12	14	12	8	11	10	12	14	12	0	1	1	0	2	1	18.5	18.5	2.1	121	1152	1152;1135;979	0	64.691	By MS/MS	By MS/MS	By MS/MS	By MS/MS	By MS/MS	By MS/MS	8.2	10.4	10.3	11.7	13.8	12.2
P27816-5	P27816-5	14	1	1	Microtubule-associated protein 4	MAP4	Isoform 5 of Microtubule-associated protein 4 OS=Homo sapiens GN=MAP4	1	14	1	1	8	9	8	10	10	10	0	0	0	1	1	0	0	0	0	1	1	0	19.8	1.6	1.6	85.251	809	809	0	2.9205	By matching	By matching	By matching	By MS/MS	By MS/MS	By matching	11.7	11.6	11.5	13.1	13.1	14.2
P28074-3;P28074	P28074-3;P28074	1;1	1;1	1;1	Proteasome subunit beta type-5	PSMB5	Isoform 3 of Proteasome subunit beta type-5 OS=Homo sapiens GN=PSMB5;Proteasome subunit beta type-5 OS=Homo sapiens GN=PSMB5 PE=1 SV=3	2	1	1	1	0	0	0	0	1	0	0	0	0	0	1	0	0	0	0	0	1	0	11.2	11.2	11.2	17.782	160	160;263	0	5.4448					By MS/MS		0	0	0	0	11.2	0
P28288-2;P28288	P28288-2;P28288	3;3	3;3	3;3	ATP-binding cassette sub-family D member 3	ABCD3	Isoform 2 of ATP-binding cassette sub-family D member 3 OS=Homo sapiens GN=ABCD3;ATP-binding cassette sub-family D member 3 OS=Homo sapiens GN=ABCD3 PE=1 SV=1	2	3	3	3	1	0	0	3	3	0	1	0	0	3	3	0	1	0	0	3	3	0	7.1	7.1	7.1	62.725	549	549;659	0	12.333	By matching			By MS/MS	By MS/MS		2.7	0	0	7.1	7.1	0
P28370-2;P28370	P28370-2;P28370	6;6	3;3	3;3	Probable global transcription activator SNF2L1	SMARCA1	Isoform 2 of Probable global transcription activator SNF2L1 OS=Homo sapiens GN=SMARCA1;Probable global transcription activator SNF2L1 OS=Homo sapiens GN=SMARCA1 PE=1 SV=2	2	6	3	3	0	0	1	6	5	1	0	0	0	3	2	0	0	0	0	3	2	0	6	3.5	3.5	121.14	1042	1042;1054	0	90.764			By matching	By MS/MS	By MS/MS	By matching	0	0	1	6	4.8	1
P28482-2;P28482	P28482-2;P28482	1;1	1;1	1;1	Mitogen-activated protein kinase 1	MAPK1	Isoform 2 of Mitogen-activated protein kinase 1 OS=Homo sapiens GN=MAPK1;Mitogen-activated protein kinase 1 OS=Homo sapiens GN=MAPK1 PE=1 SV=3	2	1	1	1	0	0	0	1	1	0	0	0	0	1	1	0	0	0	0	1	1	0	4.4	4.4	4.4	36.432	316	316;360	0.00073206	2.2016				By MS/MS	By MS/MS		0	0	0	4.4	4.4	0
P29279-2;P29279	P29279-2;P29279	1;1	1;1	1;1	Connective tissue growth factor	CTGF	Isoform 2 of Connective tissue growth factor OS=Homo sapiens GN=CTGF;Connective tissue growth factor OS=Homo sapiens GN=CTGF PE=1 SV=2	2	1	1	1	0	0	1	0	1	1	0	0	1	0	1	1	0	0	1	0	1	1	2.8	2.8	2.8	35.205	322	322;349	0.0047202	1.7004			By MS/MS		By matching	By matching	0	0	2.8	0	2.8	2.8
P29317;Q9UF33-2;Q9UF33-3;P54762-5;P54764-2;P54762;P54764;P29323-2;P54760;P29323-3;Q15375-2;Q15375-4;Q15375;P54753;Q9UF33;P29323	P29317;Q9UF33-2;Q9UF33-3;P54762-5;P54764-2;P54762;P54764;P29323-2;P54760;P29323-3;Q15375-2;Q15375-4;Q15375;P54753;Q9UF33;P29323	2;1;1;1;1;1;1;1;1;1;1;1;1;1;1;1	2;1;1;1;1;1;1;1;1;1;1;1;1;1;1;1	2;1;1;1;1;1;1;1;1;1;1;1;1;1;1;1	Ephrin type-A receptor 2;Ephrin type-A receptor 6;Ephrin type-B receptor 1;Ephrin type-A receptor 4;Ephrin type-B receptor 2;Ephrin type-B receptor 4;Ephrin type-A receptor 7;Ephrin type-B receptor 3	EPHA2;EPHA6;EPHB1;EPHA4;EPHB2;EPHB4;EPHA7;EPHB3	Ephrin type-A receptor 2 OS=Homo sapiens GN=EPHA2 PE=1 SV=2;Isoform 2 of Ephrin type-A receptor 6 OS=Homo sapiens GN=EPHA6;Isoform 3 of Ephrin type-A receptor 6 OS=Homo sapiens GN=EPHA6;Isoform 2 of Ephrin type-B receptor 1 OS=Homo sapiens GN=EPHB1;Isoform	16	2	2	2	0	0	0	2	1	0	0	0	0	2	1	0	0	0	0	2	1	0	2.5	2.5	2.5	108.27	976	976;334;398;545;935;984;986;986;987;987;993;994;998;998;1036;1055	0	3.4026				By MS/MS	By MS/MS		0	0	0	2.5	1.3	0
P29401;P29401-2	P29401;P29401-2	1;1	1;1	1;1	Transketolase	TKT	Transketolase OS=Homo sapiens GN=TKT PE=1 SV=3;Isoform 2 of Transketolase OS=Homo sapiens GN=TKT	2	1	1	1	0	0	0	0	0	1	0	0	0	0	0	1	0	0	0	0	0	1	2.9	2.9	2.9	67.877	623	623;631	0.00073421	2.2194						By MS/MS	0	0	0	0	0	2.9
P29558-2;P29558	P29558-2;P29558	1;1	1;1	1;1	RNA-binding motif, single-stranded-interacting protein 1	RBMS1	Isoform 2 of RNA-binding motif, single-stranded-interacting protein 1 OS=Homo sapiens GN=RBMS1;RNA-binding motif, single-stranded-interacting protein 1 OS=Homo sapiens GN=RBMS1 PE=1 SV=3	2	1	1	1	0	1	1	0	0	1	0	1	1	0	0	1	0	1	1	0	0	1	3.7	3.7	3.7	44.136	403	403;406	0	2.3781		By MS/MS	By MS/MS			By MS/MS	0	3.7	3.7	0	0	3.7
P30041	P30041	1	1	1	Peroxiredoxin-6	PRDX6	Peroxiredoxin-6 OS=Homo sapiens GN=PRDX6 PE=1 SV=3	1	1	1	1	1	0	0	1	1	1	1	0	0	1	1	1	1	0	0	1	1	1	5.4	5.4	5.4	25.035	224	224	0	6.3244	By matching			By MS/MS	By MS/MS	By MS/MS	5.4	0	0	5.4	5.4	5.4
P30050;P30050-2	P30050;P30050-2	3;2	3;2	3;2	60S ribosomal protein L12	RPL12	60S ribosomal protein L12 OS=Homo sapiens GN=RPL12 PE=1 SV=1;Isoform 2 of 60S ribosomal protein L12 OS=Homo sapiens GN=RPL12	2	3	3	3	0	0	2	3	3	1	0	0	2	3	3	1	0	0	2	3	3	1	24.2	24.2	24.2	17.818	165	165;132	0	11.454			By MS/MS	By MS/MS	By MS/MS	By MS/MS	0	0	14.5	24.2	24.2	5.5
P30101	P30101	4	4	4	Protein disulfide-isomerase A3	PDIA3	Protein disulfide-isomerase A3 OS=Homo sapiens GN=PDIA3 PE=1 SV=4	1	4	4	4	3	2	0	1	0	1	3	2	0	1	0	1	3	2	0	1	0	1	9.5	9.5	9.5	56.782	505	505	0	9.9733	By MS/MS	By MS/MS		By MS/MS		By MS/MS	7.1	5.1	0	2.4	0	3
P30414	P30414	10	10	10	NK-tumor recognition protein;Putative peptidyl-prolyl cis-trans isomerase	NKTR	NK-tumor recognition protein OS=Homo sapiens GN=NKTR PE=1 SV=2	1	10	10	10	3	5	5	4	8	5	3	5	5	4	8	5	3	5	5	4	8	5	10.5	10.5	10.5	165.67	1462	1462	0	28.61	By MS/MS	By MS/MS	By MS/MS	By MS/MS	By MS/MS	By MS/MS	3	5.1	4.4	5.4	9	5.1
P30419;P30419-2;O60551	P30419	5;2;1	5;2;1	5;2;1	Glycylpeptide N-tetradecanoyltransferase 1	NMT1	Glycylpeptide N-tetradecanoyltransferase 1 OS=Homo sapiens GN=NMT1 PE=1 SV=2	3	5	5	5	4	5	4	3	3	3	4	5	4	3	3	3	4	5	4	3	3	3	8.1	8.1	8.1	56.806	496	496;416;498	0	73.255	By MS/MS	By MS/MS	By MS/MS	By MS/MS	By MS/MS	By MS/MS	6.7	8.1	6	4.6	4.6	4.6
P30530-2;P30530	P30530-2;P30530	1;1	1;1	1;1	Tyrosine-protein kinase receptor UFO	AXL	Isoform Short of Tyrosine-protein kinase receptor UFO OS=Homo sapiens GN=AXL;Tyrosine-protein kinase receptor UFO OS=Homo sapiens GN=AXL PE=1 SV=3	2	1	1	1	0	0	0	1	0	0	0	0	0	1	0	0	0	0	0	1	0	0	1.9	1.9	1.9	97.376	885	885;894	0	2.8026				By MS/MS			0	0	0	1.9	0	0
P30566-2;P30566	P30566-2;P30566	1;1	1;1	1;1	Adenylosuccinate lyase	ADSL	Isoform 2 of Adenylosuccinate lyase OS=Homo sapiens GN=ADSL;Adenylosuccinate lyase OS=Homo sapiens GN=ADSL PE=1 SV=2	2	1	1	1	0	0	0	1	1	0	0	0	0	1	1	0	0	0	0	1	1	0	3.1	3.1	3.1	48.328	425	425;484	0	4.5697				By MS/MS	By MS/MS		0	0	0	3.1	3.1	0
P31689-2;P31689	P31689-2;P31689	1;1	1;1	1;1	DnaJ homolog subfamily A member 1	DNAJA1	Isoform 2 of DnaJ homolog subfamily A member 1 OS=Homo sapiens GN=DNAJA1;DnaJ homolog subfamily A member 1 OS=Homo sapiens GN=DNAJA1 PE=1 SV=2	2	1	1	1	0	0	1	0	0	1	0	0	1	0	0	1	0	0	1	0	0	1	3.9	3.9	3.9	37.044	331	331;397	0	8.2319			By matching			By MS/MS	0	0	3.9	0	0	3.9
P31942-2;P31942;P31942-3;P31942-4	P31942-2;P31942;P31942-3	4;4;3;1	4;4;3;1	4;4;3;1	Heterogeneous nuclear ribonucleoprotein H3	HNRNPH3	Isoform 2 of Heterogeneous nuclear ribonucleoprotein H3 OS=Homo sapiens GN=HNRNPH3;Heterogeneous nuclear ribonucleoprotein H3 OS=Homo sapiens GN=HNRNPH3 PE=1 SV=2;Isoform 3 of Heterogeneous nuclear ribonucleoprotein H3 OS=Homo sapiens GN=HNRNPH3	4	4	4	4	1	3	3	4	4	3	1	3	3	4	4	3	1	3	3	4	4	3	14.5	14.5	14.5	35.238	331	331;346;297;215	0	43.551	By MS/MS	By MS/MS	By MS/MS	By MS/MS	By MS/MS	By MS/MS	2.7	10.9	10.9	14.5	14.5	10.6
P31943;P55795	P31943;P55795	2;1	2;1	2;1	Heterogeneous nuclear ribonucleoprotein H;Heterogeneous nuclear ribonucleoprotein H, N-terminally processed;Heterogeneous nuclear ribonucleoprotein H2	HNRNPH1;HNRNPH2	Heterogeneous nuclear ribonucleoprotein H OS=Homo sapiens GN=HNRNPH1 PE=1 SV=4;Heterogeneous nuclear ribonucleoprotein H2 OS=Homo sapiens GN=HNRNPH2 PE=1 SV=1	2	2	2	2	0	0	0	2	2	0	0	0	0	2	2	0	0	0	0	2	2	0	6.5	6.5	6.5	49.229	449	449;449	0	13.59				By MS/MS	By MS/MS		0	0	0	6.5	6.5	0
P31946-2;P31946	P31946-2;P31946	2;1	2;1	2;1	14-3-3 protein beta/alpha;14-3-3 protein beta/alpha, N-terminally processed	YWHAB	Isoform Short of 14-3-3 protein beta/alpha OS=Homo sapiens GN=YWHAB;14-3-3 protein beta/alpha OS=Homo sapiens GN=YWHAB PE=1 SV=3	2	2	2	2	0	0	0	2	1	0	0	0	0	2	1	0	0	0	0	2	1	0	9.4	9.4	9.4	27.85	244	244;246	0	2.7088				By MS/MS	By matching		0	0	0	9.4	5.7	0
P33897	P33897	1	1	1	ATP-binding cassette sub-family D member 1	ABCD1	ATP-binding cassette sub-family D member 1 OS=Homo sapiens GN=ABCD1 PE=1 SV=2	1	1	1	1	0	0	0	1	1	0	0	0	0	1	1	0	0	0	0	1	1	0	2.7	2.7	2.7	82.936	745	745	0	4.7956				By MS/MS	By MS/MS		0	0	0	2.7	2.7	0
P33993;P33993-2;P33993-3	P33993;P33993-2	5;4;2	5;4;2	5;4;2	DNA replication licensing factor MCM7	MCM7	DNA replication licensing factor MCM7 OS=Homo sapiens GN=MCM7 PE=1 SV=4;Isoform 2 of DNA replication licensing factor MCM7 OS=Homo sapiens GN=MCM7	3	5	5	5	1	0	0	4	4	0	1	0	0	4	4	0	1	0	0	4	4	0	6.7	6.7	6.7	81.307	719	719;389;543	0	6.4753	By matching			By MS/MS	By MS/MS		1.7	0	0	6.4	5.3	0
P35080-2;P35080	P35080-2;P35080	2;2	2;2	2;2	Profilin-2	PFN2	Isoform IIb of Profilin-2 OS=Homo sapiens GN=PFN2;Profilin-2 OS=Homo sapiens GN=PFN2 PE=1 SV=3	2	2	2	2	1	1	1	1	2	1	1	1	1	1	2	1	1	1	1	1	2	1	11.4	11.4	11.4	15.088	140	140;140	0	5.0557	By MS/MS	By matching	By MS/MS	By MS/MS	By MS/MS	By MS/MS	10	10	10	10	11.4	10
P35251-2;P35251	P35251-2;P35251	20;20	20;20	20;20	Replication factor C subunit 1	RFC1	Isoform 2 of Replication factor C subunit 1 OS=Homo sapiens GN=RFC1;Replication factor C subunit 1 OS=Homo sapiens GN=RFC1 PE=1 SV=4	2	20	20	20	13	12	13	6	10	18	13	12	13	6	10	18	13	12	13	6	10	18	18	18	18	128.18	1147	1147;1148	0	323.31	By MS/MS	By MS/MS	By MS/MS	By MS/MS	By MS/MS	By MS/MS	14.2	12.4	11.4	6.5	10.5	15.5
P35268	P35268	2	2	2	60S ribosomal protein L22	RPL22	60S ribosomal protein L22 OS=Homo sapiens GN=RPL22 PE=1 SV=2	1	2	2	2	2	2	2	2	2	2	2	2	2	2	2	2	2	2	2	2	2	2	21.9	21.9	21.9	14.787	128	128	0	133.11	By MS/MS	By MS/MS	By MS/MS	By MS/MS	By MS/MS	By MS/MS	21.9	21.9	21.9	21.9	21.9	21.9
P35269	P35269	7	7	7	General transcription factor IIF subunit 1	GTF2F1	General transcription factor IIF subunit 1 OS=Homo sapiens GN=GTF2F1 PE=1 SV=2	1	7	7	7	5	5	7	0	0	7	5	5	7	0	0	7	5	5	7	0	0	7	18.6	18.6	18.6	58.24	517	517	0	42.134	By MS/MS	By MS/MS	By MS/MS			By MS/MS	15.7	15.1	18.6	0	0	18.6
P35579;P35579-2;Q7Z406-2;Q7Z406-6;Q7Z406;Q7Z406-5;Q7Z406-4;P11055;Q9UKX2;A7E2Y1;REV__Q9UKV3-5;P13533;REV__Q9UKV3;Q9Y623;Q9UKX3;P13535;P12883;P12882	P35579;P35579-2	51;37;5;5;5;4;4;1;1;1;1;1;1;1;1;1;1;1	51;37;5;5;5;4;4;1;1;1;1;1;1;1;1;1;1;1	42;28;0;0;0;0;0;0;0;0;1;0;1;0;0;0;0;0	Myosin-9	MYH9	Myosin-9 OS=Homo sapiens GN=MYH9 PE=1 SV=4;Isoform 2 of Myosin-9 OS=Homo sapiens GN=MYH9	18	51	51	42	21	12	19	46	44	15	21	12	19	46	44	15	19	12	15	38	37	14	23.8	23.8	20.3	226.53	1960	1960;1382;2036;2003;1995;1478;1779;1940;1941;1941;1328;1939;1341;1939;1938;1937;1935;1939	0	323.31	By MS/MS	By MS/MS	By MS/MS	By MS/MS	By MS/MS	By MS/MS	10.2	6.3	10	22.2	21.2	8.9
P35580;P35580-5;P35580-2;P35580-3;P35580-4	P35580;P35580-5;P35580-2;P35580-3;P35580-4	12;12;12;12;12	5;5;5;5;5	5;5;5;5;5	Myosin-10	MYH10	Myosin-10 OS=Homo sapiens GN=MYH10 PE=1 SV=3;Isoform 5 of Myosin-10 OS=Homo sapiens GN=MYH10;Isoform 2 of Myosin-10 OS=Homo sapiens GN=MYH10;Isoform 3 of Myosin-10 OS=Homo sapiens GN=MYH10;Isoform 4 of Myosin-10 OS=Homo sapiens GN=MYH10	5	12	5	5	2	1	4	10	8	1	1	1	1	4	3	1	1	1	1	4	3	1	6.4	3.4	3.4	229	1976	1976;1985;1992;1997;2007	0	168.26	By matching	By matching	By MS/MS	By MS/MS	By MS/MS	By MS/MS	1.2	0.6	1.8	5.5	4.3	0.6
P35606-2;P35606	P35606-2;P35606	1;1	1;1	1;1	Coatomer subunit beta	COPB2	Isoform 2 of Coatomer subunit beta OS=Homo sapiens GN=COPB2;Coatomer subunit beta OS=Homo sapiens GN=COPB2 PE=1 SV=2	2	1	1	1	0	0	0	1	0	0	0	0	0	1	0	0	0	0	0	1	0	0	1.1	1.1	1.1	99.045	877	877;906	0.0089686	1.4144				By MS/MS			0	0	0	1.1	0	0
P35637-2;P35637;Q92804-2;Q92804	P35637-2;P35637;Q92804-2;Q92804	1;1;1;1	1;1;1;1	1;1;1;1	RNA-binding protein FUS;TATA-binding protein-associated factor 2N	FUS;TAF15	Isoform Short of RNA-binding protein FUS OS=Homo sapiens GN=FUS;RNA-binding protein FUS OS=Homo sapiens GN=FUS PE=1 SV=1;Isoform Short of TATA-binding protein-associated factor 2N OS=Homo sapiens GN=TAF15;TATA-binding protein-associated factor 2N OS=Homo s	4	1	1	1	1	0	0	1	1	1	1	0	0	1	1	1	1	0	0	1	1	1	2.7	2.7	2.7	53.354	525	525;526;589;592	0.00075643	2.3457	By MS/MS			By MS/MS	By MS/MS	By MS/MS	2.7	0	0	2.7	2.7	2.7
P35659;P35659-2	P35659;P35659-2	13;11	13;11	13;11	Protein DEK	DEK	Protein DEK OS=Homo sapiens GN=DEK PE=1 SV=1;Isoform 2 of Protein DEK OS=Homo sapiens GN=DEK	2	13	13	13	9	10	8	0	0	13	9	10	8	0	0	13	9	10	8	0	0	13	29.9	29.9	29.9	42.674	375	375;341	0	110.24	By MS/MS	By MS/MS	By MS/MS			By MS/MS	22.9	28.3	20.3	0	0	29.9
P35711-4;P35711-2;P35711-5;P35711	P35711-4;P35711-2;P35711-5;P35711	1;1;1;1	1;1;1;1	1;1;1;1	Transcription factor SOX-5	SOX5	Isoform 4 of Transcription factor SOX-5 OS=Homo sapiens GN=SOX5;Isoform 2 of Transcription factor SOX-5 OS=Homo sapiens GN=SOX5;Isoform 5 of Transcription factor SOX-5 OS=Homo sapiens GN=SOX5;Transcription factor SOX-5 OS=Homo sapiens GN=SOX5 PE=1 SV=3	4	1	1	1	0	1	0	0	0	0	0	1	0	0	0	0	0	1	0	0	0	0	2	2	2	71.043	642	642;750;753;763	1	-2		By MS/MS					0	2	0	0	0	0
P35998-2;P35998	P35998-2;P35998	1;1	1;1	1;1	26S protease regulatory subunit 7	PSMC2	Isoform 2 of 26S proteasome regulatory subunit 7 OS=Homo sapiens GN=PSMC2;26S proteasome regulatory subunit 7 OS=Homo sapiens GN=PSMC2 PE=1 SV=3	2	1	1	1	0	0	0	1	0	0	0	0	0	1	0	0	0	0	0	1	0	0	4.4	4.4	4.4	33.273	296	296;433	0	3.6263				By MS/MS			0	0	0	4.4	0	0
P36542-2;P36542	P36542-2;P36542	1;1	1;1	1;1	ATP synthase subunit gamma, mitochondrial	ATP5C1	Isoform Heart of ATP synthase subunit gamma, mitochondrial OS=Homo sapiens GN=ATP5C1;ATP synthase subunit gamma, mitochondrial OS=Homo sapiens GN=ATP5C1 PE=1 SV=1	2	1	1	1	0	0	0	1	1	0	0	0	0	1	1	0	0	0	0	1	1	0	3.7	3.7	3.7	32.881	297	297;298	0.00075415	2.3243				By MS/MS	By MS/MS		0	0	0	3.7	3.7	0
P36578	P36578	15	15	15	60S ribosomal protein L4	RPL4	60S ribosomal protein L4 OS=Homo sapiens GN=RPL4 PE=1 SV=5	1	15	15	15	10	9	9	9	9	13	10	9	9	9	9	13	10	9	9	9	9	13	34.7	34.7	34.7	47.697	427	427	0	45.905	By MS/MS	By MS/MS	By MS/MS	By MS/MS	By MS/MS	By MS/MS	23.2	19.4	20.4	22.5	22.5	29
P36639-4;P36639-3;P36639-2;P36639	P36639-4;P36639-3;P36639-2;P36639	1;1;1;1	1;1;1;1	1;1;1;1	7,8-dihydro-8-oxoguanine triphosphatase	NUDT1	Isoform p18 of 7,8-dihydro-8-oxoguanine triphosphatase OS=Homo sapiens GN=NUDT1;Isoform p21 of 7,8-dihydro-8-oxoguanine triphosphatase OS=Homo sapiens GN=NUDT1;Isoform p22 of 7,8-dihydro-8-oxoguanine triphosphatase OS=Homo sapiens GN=NUDT1;7,8-dihydro-8-ox	4	1	1	1	0	0	0	0	1	0	0	0	0	0	1	0	0	0	0	0	1	0	7.7	7.7	7.7	17.951	156	156;171;179;197	0.0095908	1.4059					By MS/MS		0	0	0	0	7.7	0
P36776-3;P36776-2;P36776	P36776-3;P36776-2;P36776	1;1;1	1;1;1	1;1;1	Lon protease homolog, mitochondrial	LONP1	Isoform 3 of Lon protease homolog, mitochondrial OS=Homo sapiens GN=LONP1;Isoform 2 of Lon protease homolog, mitochondrial OS=Homo sapiens GN=LONP1;Lon protease homolog, mitochondrial OS=Homo sapiens GN=LONP1 PE=1 SV=2	3	1	1	1	0	0	0	1	0	0	0	0	0	1	0	0	0	0	0	1	0	0	1.3	1.3	1.3	85.64	763	763;895;959	0.0083387	1.4237				By MS/MS			0	0	0	1.3	0	0
P36915	P36915	1	1	1	Guanine nucleotide-binding protein-like 1	GNL1	Guanine nucleotide-binding protein-like 1 OS=Homo sapiens GN=GNL1 PE=1 SV=2	1	1	1	1	1	1	1	1	1	1	1	1	1	1	1	1	1	1	1	1	1	1	2	2	2	68.66	607	607	0	2.4215	By MS/MS	By MS/MS	By MS/MS	By MS/MS	By matching	By MS/MS	2	2	2	2	2	2
P37108	P37108	3	3	3	Signal recognition particle 14 kDa protein	SRP14	Signal recognition particle 14 kDa protein OS=Homo sapiens GN=SRP14 PE=1 SV=2	1	3	3	3	2	3	3	3	3	2	2	3	3	3	3	2	2	3	3	3	3	2	15.4	15.4	15.4	14.57	136	136	0	5.4778	By MS/MS	By MS/MS	By MS/MS	By MS/MS	By MS/MS	By MS/MS	9.6	15.4	15.4	15.4	15.4	15.4
P37268-4;P37268-3;P37268-2;P37268-5;P37268	P37268-4;P37268-3;P37268-2;P37268-5;P37268	1;1;1;1;1	1;1;1;1;1	1;1;1;1;1	Squalene synthase	FDFT1	Isoform 4 of Squalene synthase OS=Homo sapiens GN=FDFT1;Isoform 3 of Squalene synthase OS=Homo sapiens GN=FDFT1;Isoform 2 of Squalene synthase OS=Homo sapiens GN=FDFT1;Isoform 5 of Squalene synthase OS=Homo sapiens GN=FDFT1;Squalene synthase OS=Homo sapien	5	1	1	1	0	1	0	1	1	0	0	1	0	1	1	0	0	1	0	1	1	0	3.9	3.9	3.9	35.101	306	306;332;353;374;417	0	2.6354		By matching		By MS/MS	By MS/MS		0	3.9	0	3.9	3.9	0
P37802;P37802-2	P37802;P37802-2	2;1	2;1	2;1	Transgelin-2	TAGLN2	Transgelin-2 OS=Homo sapiens GN=TAGLN2 PE=1 SV=3;Isoform 2 of Transgelin-2 OS=Homo sapiens GN=TAGLN2	2	2	2	2	1	0	0	2	2	0	1	0	0	2	2	0	1	0	0	2	2	0	9.5	9.5	9.5	22.391	199	199;220	0	3.5498	By matching			By MS/MS	By MS/MS		4	0	0	9.5	9.5	0
P38159-2;P38159;P38159-3;O75526	P38159-2;P38159	12;11;3;1	12;11;3;1	4;3;1;0	RNA-binding motif protein, X chromosome;RNA-binding motif protein, X chromosome, N-terminally processed	RBMX	Isoform 2 of RNA-binding motif protein, X chromosome OS=Homo sapiens GN=RBMX;RNA-binding motif protein, X chromosome OS=Homo sapiens GN=RBMX PE=1 SV=3	4	12	12	4	4	5	11	11	12	10	4	5	11	11	12	10	2	3	4	3	4	4	31.5	31.5	10.6	40.846	378	378;391;196;392	0	30.953	By MS/MS	By MS/MS	By MS/MS	By MS/MS	By MS/MS	By MS/MS	11.1	13.2	29.4	29.4	31.5	27.8
P38432	P38432	15	15	15	Coilin	COIL	Coilin OS=Homo sapiens GN=COIL PE=1 SV=1	1	15	15	15	12	11	14	4	4	15	12	11	14	4	4	15	12	11	14	4	4	15	26	26	26	62.608	576	576	0	158.45	By MS/MS	By MS/MS	By MS/MS	By matching	By matching	By MS/MS	22.9	18.6	24.5	6.1	6.1	26
P38606-2;P38606	P38606-2;P38606	3;3	3;3	3;3	V-type proton ATPase catalytic subunit A	ATP6V1A	Isoform 2 of V-type proton ATPase catalytic subunit A OS=Homo sapiens GN=ATP6V1A;V-type proton ATPase catalytic subunit A OS=Homo sapiens GN=ATP6V1A PE=1 SV=2	2	3	3	3	0	0	0	2	3	0	0	0	0	2	3	0	0	0	0	2	3	0	5.7	5.7	5.7	64.735	584	584;617	0	39.811				By MS/MS	By MS/MS		0	0	0	4.1	5.7	0
P38646	P38646	2	2	2	Stress-70 protein, mitochondrial	HSPA9	Stress-70 protein, mitochondrial OS=Homo sapiens GN=HSPA9 PE=1 SV=2	1	2	2	2	0	1	1	2	2	2	0	1	1	2	2	2	0	1	1	2	2	2	3.4	3.4	3.4	73.68	679	679	0	3.0655		By matching	By matching	By MS/MS	By MS/MS	By matching	0	1.3	1.3	3.4	3.4	3.4
P38919	P38919	4	4	3	Eukaryotic initiation factor 4A-III;Eukaryotic initiation factor 4A-III, N-terminally processed	EIF4A3	Eukaryotic initiation factor 4A-III OS=Homo sapiens GN=EIF4A3 PE=1 SV=4	1	4	4	3	0	0	1	2	4	1	0	0	1	2	4	1	0	0	1	2	3	1	8.5	8.5	6.8	46.871	411	411	0	10.922			By matching	By MS/MS	By MS/MS	By matching	0	0	2.9	3.4	8.5	2.9
P38935	P38935	1	1	1	DNA-binding protein SMUBP-2	IGHMBP2	DNA-binding protein SMUBP-2 OS=Homo sapiens GN=IGHMBP2 PE=1 SV=3	1	1	1	1	0	0	0	1	1	0	0	0	0	1	1	0	0	0	0	1	1	0	1.7	1.7	1.7	109.15	993	993	0	2.962				By MS/MS	By MS/MS		0	0	0	1.7	1.7	0
P39019	P39019	2	2	2	40S ribosomal protein S19	RPS19	40S ribosomal protein S19 OS=Homo sapiens GN=RPS19 PE=1 SV=2	1	2	2	2	1	1	1	2	2	1	1	1	1	2	2	1	1	1	1	2	2	1	13.1	13.1	13.1	16.06	145	145	0	3.5138	By MS/MS	By matching	By MS/MS	By MS/MS	By MS/MS	By matching	6.2	6.2	6.2	13.1	13.1	6.2
P39023;Q92901	P39023	9;1	9;1	9;1	60S ribosomal protein L3	RPL3	60S ribosomal protein L3 OS=Homo sapiens GN=RPL3 PE=1 SV=2	2	9	9	9	4	4	4	6	6	6	4	4	4	6	6	6	4	4	4	6	6	6	16.9	16.9	16.9	46.108	403	403;407	0	51.926	By MS/MS	By MS/MS	By MS/MS	By MS/MS	By MS/MS	By MS/MS	7.4	7.4	7.4	13.2	11.4	10.2
P39656;P39656-3;P39656-2	P39656;P39656-3;P39656-2	2;2;1	2;2;1	2;2;1	Dolichyl-diphosphooligosaccharide--protein glycosyltransferase 48 kDa subunit	DDOST	Dolichyl-diphosphooligosaccharide--protein glycosyltransferase 48 kDa subunit OS=Homo sapiens GN=DDOST PE=1 SV=4;Isoform 3 of Dolichyl-diphosphooligosaccharide--protein glycosyltransferase 48 kDa subunit OS=Homo sapiens GN=DDOST;Isoform 2 of Dolichyl-dipho	3	2	2	2	0	0	1	2	2	0	0	0	1	2	2	0	0	0	1	2	2	0	3.9	3.9	3.9	50.8	456	456;438;419	0	3.1895			By MS/MS	By MS/MS	By MS/MS		0	0	2.4	3.9	3.9	0
P39748-2;P39748	P39748-2;P39748	1;1	1;1	1;1	Flap endonuclease 1	FEN1	Isoform FENMIT of Flap endonuclease 1 OS=Homo sapiens GN=FEN1;Flap endonuclease 1 OS=Homo sapiens GN=FEN1 PE=1 SV=1	2	1	1	1	0	0	0	1	1	0	0	0	0	1	1	0	0	0	0	1	1	0	5.1	5.1	5.1	35.673	316	316;380	0	37.267				By MS/MS	By matching		0	0	0	5.1	5.1	0
P40227-2;P40227	P40227-2;P40227	1;1	1;1	1;1	T-complex protein 1 subunit zeta	CCT6A	Isoform 2 of T-complex protein 1 subunit zeta OS=Homo sapiens GN=CCT6A;T-complex protein 1 subunit zeta OS=Homo sapiens GN=CCT6A PE=1 SV=3	2	1	1	1	0	0	0	1	1	1	0	0	0	1	1	1	0	0	0	1	1	1	1.9	1.9	1.9	53.288	486	486;531	0.0046823	1.6773				By MS/MS	By MS/MS	By matching	0	0	0	1.9	1.9	1.9
P40429;Q6NVV1	P40429	7;3	7;3	7;3	60S ribosomal protein L13a	RPL13A	60S ribosomal protein L13a OS=Homo sapiens GN=RPL13A PE=1 SV=2	2	7	7	7	5	4	5	5	5	5	5	4	5	5	5	5	5	4	5	5	5	5	27.6	27.6	27.6	23.577	203	203;102	0	84.685	By MS/MS	By MS/MS	By MS/MS	By MS/MS	By MS/MS	By MS/MS	19.2	14.8	19.2	20.2	20.2	23.2
P40692-2;P40692-3;P40692	P40692-2;P40692-3;P40692	1;1;1	1;1;1	1;1;1	DNA mismatch repair protein Mlh1	MLH1	Isoform 2 of DNA mismatch repair protein Mlh1 OS=Homo sapiens GN=MLH1;Isoform 3 of DNA mismatch repair protein Mlh1 OS=Homo sapiens GN=MLH1;DNA mismatch repair protein Mlh1 OS=Homo sapiens GN=MLH1 PE=1 SV=1	3	1	1	1	0	0	0	0	1	0	0	0	0	0	1	0	0	0	0	0	1	0	3.5	3.5	3.5	58.374	515	515;658;756	0	3.6453					By MS/MS		0	0	0	0	3.5	0
P40926;P40926-2	P40926;P40926-2	3;2	3;2	3;2	Malate dehydrogenase, mitochondrial	MDH2	Malate dehydrogenase, mitochondrial OS=Homo sapiens GN=MDH2 PE=1 SV=3;Isoform 2 of Malate dehydrogenase, mitochondrial OS=Homo sapiens GN=MDH2	2	3	3	3	2	2	0	0	1	1	2	2	0	0	1	1	2	2	0	0	1	1	8.6	8.6	8.6	35.503	338	338;296	0	2.9273	By MS/MS	By MS/MS			By matching	By MS/MS	5.6	5.9	0	0	3	3
P40938-2;P40938	P40938-2;P40938	2;2	2;2	2;2	Replication factor C subunit 3	RFC3	Isoform 2 of Replication factor C subunit 3 OS=Homo sapiens GN=RFC3;Replication factor C subunit 3 OS=Homo sapiens GN=RFC3 PE=1 SV=2	2	2	2	2	0	0	0	2	2	0	0	0	0	2	2	0	0	0	0	2	2	0	9.2	9.2	9.2	34.756	305	305;356	0	47.903				By MS/MS	By MS/MS		0	0	0	9.2	9.2	0
P41091;Q2VIR3;Q2VIR3-2	P41091;Q2VIR3	5;4;2	5;4;2	5;4;2	Eukaryotic translation initiation factor 2 subunit 3;Putative eukaryotic translation initiation factor 2 subunit 3-like protein	EIF2S3;EIF2S3L	Eukaryotic translation initiation factor 2 subunit 3 OS=Homo sapiens GN=EIF2S3 PE=1 SV=3;Putative eukaryotic translation initiation factor 2 subunit 3-like protein OS=Homo sapiens GN=EIF2S3L PE=5 SV=2	3	5	5	5	0	2	2	4	5	2	0	2	2	4	5	2	0	2	2	4	5	2	14.6	14.6	14.6	51.109	472	472;472;466	0	28.396		By MS/MS	By MS/MS	By MS/MS	By MS/MS	By MS/MS	0	6.1	6.8	12.3	14.6	7.2
P41214	P41214	1	1	1	Eukaryotic translation initiation factor 2D	EIF2D	Eukaryotic translation initiation factor 2D OS=Homo sapiens GN=EIF2D PE=1 SV=3	1	1	1	1	0	0	0	1	1	0	0	0	0	1	1	0	0	0	0	1	1	0	2.1	2.1	2.1	64.706	584	584	0.0027379	1.8079				By MS/MS	By MS/MS		0	0	0	2.1	2.1	0
P41227-2;P41227	P41227-2;P41227	2;2	2;2	2;2	N-alpha-acetyltransferase 10	NAA10	Isoform 2 of N-alpha-acetyltransferase 10 OS=Homo sapiens GN=NAA10;N-alpha-acetyltransferase 10 OS=Homo sapiens GN=NAA10 PE=1 SV=1	2	2	2	2	0	0	0	1	2	0	0	0	0	1	2	0	0	0	0	1	2	0	23.6	23.6	23.6	24.783	220	220;235	0	11.134				By MS/MS	By MS/MS		0	0	0	6.8	23.6	0
P41252	P41252	1	1	1	Isoleucine--tRNA ligase, cytoplasmic	IARS	Isoleucine--tRNA ligase, cytoplasmic OS=Homo sapiens GN=IARS PE=1 SV=2	1	1	1	1	0	0	0	1	1	0	0	0	0	1	1	0	0	0	0	1	1	0	1	1	1	144.5	1262	1262	0	3.9825				By MS/MS	By MS/MS		0	0	0	1	1	0
P42167;P42167-3;P42167-2;P42166	P42167;P42167-3;P42167-2;P42166	7;6;6;6	7;6;6;6	7;6;6;6	Lamina-associated polypeptide 2, isoforms beta/gamma;Thymopoietin;Thymopentin;Lamina-associated polypeptide 2, isoform alpha;Thymopoietin;Thymopentin	TMPO	Lamina-associated polypeptide 2, isoforms beta/gamma OS=Homo sapiens GN=TMPO PE=1 SV=2;Isoform Zeta of Lamina-associated polypeptide 2, isoforms beta/gamma OS=Homo sapiens GN=TMPO;Isoform Gamma of Lamina-associated polypeptide 2, isoforms beta/gamma OS=Hom	4	7	7	7	4	3	0	1	1	3	4	3	0	1	1	3	4	3	0	1	1	3	23.1	23.1	23.1	50.67	454	454;248;345;694	0	13.449	By MS/MS	By MS/MS		By MS/MS	By MS/MS	By MS/MS	12.6	9.3	0	2.2	3.5	11.9
P42345	P42345	3	3	3	Serine/threonine-protein kinase mTOR	MTOR	Serine/threonine-protein kinase mTOR OS=Homo sapiens GN=MTOR PE=1 SV=1	1	3	3	3	0	0	0	3	3	0	0	0	0	3	3	0	0	0	0	3	3	0	1.2	1.2	1.2	288.89	2549	2549	0	20.758				By MS/MS	By MS/MS		0	0	0	1.2	1.2	0
P42356	P42356	3	3	3	Phosphatidylinositol 4-kinase alpha	PI4KA	Phosphatidylinositol 4-kinase alpha OS=Homo sapiens GN=PI4KA PE=1 SV=4	1	3	3	3	0	0	0	2	3	0	0	0	0	2	3	0	0	0	0	2	3	0	1.5	1.5	1.5	236.83	2102	2102	0	3.3788				By MS/MS	By MS/MS		0	0	0	1.1	1.5	0
P42568;P42568-2	P42568;P42568-2	5;4	5;4	5;4	Protein AF-9	MLLT3	Protein AF-9 OS=Homo sapiens GN=MLLT3 PE=1 SV=2;Isoform 2 of Protein AF-9 OS=Homo sapiens GN=MLLT3	2	5	5	5	3	4	4	0	0	3	3	4	4	0	0	3	3	4	4	0	0	3	9.5	9.5	9.5	63.351	568	568;565	0	8.2614	By MS/MS	By MS/MS	By MS/MS			By MS/MS	5.6	7.7	7.4	0	0	5.8
P42677;Q71UM5	P42677;Q71UM5	3;2	3;2	3;2	40S ribosomal protein S27;40S ribosomal protein S27-like	RPS27;RPS27L	40S ribosomal protein S27 OS=Homo sapiens GN=RPS27 PE=1 SV=3;40S ribosomal protein S27-like OS=Homo sapiens GN=RPS27L PE=1 SV=3	2	3	3	3	1	1	1	2	1	3	1	1	1	2	1	3	1	1	1	2	1	3	38.1	38.1	38.1	9.461	84	84;84	0	3.9291	By MS/MS	By MS/MS	By MS/MS	By MS/MS	By MS/MS	By MS/MS	9.5	9.5	9.5	22.6	9.5	38.1
P42695	P42695	4	4	4	Condensin-2 complex subunit D3	NCAPD3	Condensin-2 complex subunit D3 OS=Homo sapiens GN=NCAPD3 PE=1 SV=2	1	4	4	4	0	0	0	1	3	0	0	0	0	1	3	0	0	0	0	1	3	0	3.9	3.9	3.9	168.89	1498	1498	0	25.136				By MS/MS	By MS/MS		0	0	0	1.3	2.6	0
P42696;P42696-2	P42696;P42696-2	7;6	7;6	7;6	RNA-binding protein 34	RBM34	RNA-binding protein 34 OS=Homo sapiens GN=RBM34 PE=1 SV=2;Isoform 2 of RNA-binding protein 34 OS=Homo sapiens GN=RBM34	2	7	7	7	4	4	3	6	5	5	4	4	3	6	5	5	4	4	3	6	5	5	14.7	14.7	14.7	48.564	430	430;225	0	56.645	By MS/MS	By MS/MS	By MS/MS	By MS/MS	By MS/MS	By MS/MS	9.5	9.5	7.9	12.8	12.8	12.6
P42704	P42704	7	7	7	Leucine-rich PPR motif-containing protein, mitochondrial	LRPPRC	Leucine-rich PPR motif-containing protein, mitochondrial OS=Homo sapiens GN=LRPPRC PE=1 SV=3	1	7	7	7	0	0	0	7	6	0	0	0	0	7	6	0	0	0	0	7	6	0	6.2	6.2	6.2	157.9	1394	1394	0	13.819				By MS/MS	By MS/MS		0	0	0	6.2	5.4	0
P42766	P42766	3	3	3	60S ribosomal protein L35	RPL35	60S ribosomal protein L35 OS=Homo sapiens GN=RPL35 PE=1 SV=2	1	3	3	3	1	1	2	2	2	3	1	1	2	2	2	3	1	1	2	2	2	3	20.3	20.3	20.3	14.551	123	123	0	66.826	By MS/MS	By MS/MS	By MS/MS	By MS/MS	By MS/MS	By MS/MS	8.1	8.1	17.1	17.1	17.1	20.3
P42858	P42858	3	3	3	Huntingtin	HTT	Huntingtin OS=Homo sapiens GN=HTT PE=1 SV=2	1	3	3	3	0	0	0	2	3	0	0	0	0	2	3	0	0	0	0	2	3	0	1.4	1.4	1.4	347.6	3142	3142	0	23.886				By MS/MS	By MS/MS		0	0	0	1	1.4	0
P43121	P43121	1	1	1	Cell surface glycoprotein MUC18	MCAM	Cell surface glycoprotein MUC18 OS=Homo sapiens GN=MCAM PE=1 SV=2	1	1	1	1	0	0	0	1	1	0	0	0	0	1	1	0	0	0	0	1	1	0	2.3	2.3	2.3	71.607	646	646	0.00073638	2.2292				By MS/MS	By MS/MS		0	0	0	2.3	2.3	0
P43243	P43243	1	1	1	Matrin-3	MATR3	Matrin-3 OS=Homo sapiens GN=MATR3 PE=1 SV=2	1	1	1	1	0	1	1	1	1	0	0	1	1	1	1	0	0	1	1	1	1	0	1.3	1.3	1.3	94.622	847	847	0	2.6959		By matching	By matching	By MS/MS	By MS/MS		0	1.3	1.3	1.3	1.3	0
P45880;P45880-2;P45880-1	P45880;P45880-2;P45880-1	4;3;3	4;3;3	4;3;3	Voltage-dependent anion-selective channel protein 2	VDAC2	Voltage-dependent anion-selective channel protein 2 OS=Homo sapiens GN=VDAC2 PE=1 SV=2;Isoform 2 of Voltage-dependent anion-selective channel protein 2 OS=Homo sapiens GN=VDAC2;Isoform 1 of Voltage-dependent anion-selective channel protein 2 OS=Homo sapien	3	4	4	4	1	0	0	4	4	0	1	0	0	4	4	0	1	0	0	4	4	0	19	19	19	31.566	294	294;283;309	0	22.924	By MS/MS			By MS/MS	By MS/MS		4.1	0	0	19	19	0
P45973	P45973	7	7	7	Chromobox protein homolog 5	CBX5	Chromobox protein homolog 5 OS=Homo sapiens GN=CBX5 PE=1 SV=1	1	7	7	7	5	5	6	2	2	7	5	5	6	2	2	7	5	5	6	2	2	7	25.1	25.1	25.1	22.225	191	191	0	133.31	By MS/MS	By MS/MS	By MS/MS	By MS/MS	By MS/MS	By MS/MS	17.3	17.3	24.1	9.9	9.9	25.1
P46013;P46013-2	P46013;P46013-2	78;69	78;69	78;69	Antigen KI-67	MKI67	Proliferation marker protein Ki-67 OS=Homo sapiens GN=MKI67 PE=1 SV=2;Isoform Short of Proliferation marker protein Ki-67 OS=Homo sapiens GN=MKI67	2	78	78	78	51	52	42	58	57	54	51	52	42	58	57	54	51	52	42	58	57	54	29.9	29.9	29.9	358.69	3256	3256;2896	0	323.31	By MS/MS	By MS/MS	By MS/MS	By MS/MS	By MS/MS	By MS/MS	22.1	21.4	16.8	23.1	22.9	23
P46087;P46087-4;P46087-2;P46087-3	P46087;P46087-4;P46087-2;P46087-3	22;22;21;11	22;22;21;11	22;22;21;11	Probable 28S rRNA (cytosine(4447)-C(5))-methyltransferase	NOP2	Probable 28S rRNA (cytosine(4447)-C(5))-methyltransferase OS=Homo sapiens GN=NOP2 PE=1 SV=2;Isoform 4 of Probable 28S rRNA (cytosine(4447)-C(5))-methyltransferase OS=Homo sapiens GN=NOP2;Isoform 2 of Probable 28S rRNA (cytosine(4447)-C(5))-methyltransferas	4	22	22	22	12	13	15	13	15	13	12	13	15	13	15	13	12	13	15	13	15	13	29.7	29.7	29.7	89.301	812	812;845;808;628	0	221.96	By MS/MS	By MS/MS	By MS/MS	By MS/MS	By MS/MS	By MS/MS	15.4	19	21.6	18.5	24.5	19.2
P46100-4;P46100;P46100-2;P46100-5;P46100-3;P46100-6	P46100-4;P46100;P46100-2;P46100-5;P46100-3;P46100-6	13;13;12;12;12;7	13;13;12;12;12;7	13;13;12;12;12;7	Transcriptional regulator ATRX	ATRX	Isoform 3 of Transcriptional regulator ATRX OS=Homo sapiens GN=ATRX;Transcriptional regulator ATRX OS=Homo sapiens GN=ATRX PE=1 SV=5;Isoform 1 of Transcriptional regulator ATRX OS=Homo sapiens GN=ATRX;Isoform 5 of Transcriptional regulator ATRX OS=Homo sap	6	13	13	13	8	12	10	3	4	11	8	12	10	3	4	11	8	12	10	3	4	11	6.2	6.2	6.2	278.23	2454	2454;2492;2288;2337;2375;1350	0	51.161	By MS/MS	By MS/MS	By MS/MS	By MS/MS	By MS/MS	By MS/MS	3.3	5.4	4.4	1.3	1.9	5.3
P46776	P46776	5	5	5	60S ribosomal protein L27a	RPL27A	60S ribosomal protein L27a OS=Homo sapiens GN=RPL27A PE=1 SV=2	1	5	5	5	2	3	3	4	5	3	2	3	3	4	5	3	2	3	3	4	5	3	29.7	29.7	29.7	16.561	148	148	0	30.818	By MS/MS	By MS/MS	By MS/MS	By MS/MS	By MS/MS	By MS/MS	15.5	22.3	22.3	23	29.7	16.9
P46777	P46777	5	5	5	60S ribosomal protein L5	RPL5	60S ribosomal protein L5 OS=Homo sapiens GN=RPL5 PE=1 SV=3	1	5	5	5	1	2	3	4	3	4	1	2	3	4	3	4	1	2	3	4	3	4	20.2	20.2	20.2	34.362	297	297	0	22.517	By MS/MS	By MS/MS	By MS/MS	By MS/MS	By MS/MS	By MS/MS	4.7	7.7	11.8	15.8	11.8	16.2
P46779;P46779-2;P46779-3;P46779-4;P46779-5	P46779;P46779-2;P46779-3;P46779-4;P46779-5	7;6;6;5;5	7;6;6;5;5	7;6;6;5;5	60S ribosomal protein L28	RPL28	60S ribosomal protein L28 OS=Homo sapiens GN=RPL28 PE=1 SV=3;Isoform 2 of 60S ribosomal protein L28 OS=Homo sapiens GN=RPL28;Isoform 3 of 60S ribosomal protein L28 OS=Homo sapiens GN=RPL28;Isoform 4 of 60S ribosomal protein L28 OS=Homo sapiens GN=RPL28;Iso	5	7	7	7	3	5	5	6	5	6	3	5	5	6	5	6	3	5	5	6	5	6	35.8	35.8	35.8	15.747	137	137;163;169;69;87	0	58.753	By MS/MS	By MS/MS	By MS/MS	By MS/MS	By MS/MS	By MS/MS	17.5	24.1	24.1	29.9	29.2	29.9
P46781	P46781	6	6	6	40S ribosomal protein S9	RPS9	40S ribosomal protein S9 OS=Homo sapiens GN=RPS9 PE=1 SV=3	1	6	6	6	0	0	0	5	6	0	0	0	0	5	6	0	0	0	0	5	6	0	30.9	30.9	30.9	22.591	194	194	0	23.292				By MS/MS	By MS/MS		0	0	0	25.3	30.9	0
P46783;Q9NQ39	P46783;Q9NQ39	1;1	1;1	1;1	40S ribosomal protein S10;Putative 40S ribosomal protein S10-like	RPS10;RPS10P5	40S ribosomal protein S10 OS=Homo sapiens GN=RPS10 PE=1 SV=1;Putative 40S ribosomal protein S10-like OS=Homo sapiens GN=RPS10P5 PE=5 SV=1	2	1	1	1	0	0	0	1	0	0	0	0	0	1	0	0	0	0	0	1	0	0	8.5	8.5	8.5	18.898	165	165;176	0.0014399	2.1053				By MS/MS			0	0	0	8.5	0	0
P46821	P46821	30	30	30	Microtubule-associated protein 1B;MAP1B heavy chain;MAP1 light chain LC1	MAP1B	Microtubule-associated protein 1B OS=Homo sapiens GN=MAP1B PE=1 SV=2	1	30	30	30	17	20	24	6	10	29	17	20	24	6	10	29	17	20	24	6	10	29	14.4	14.4	14.4	270.63	2468	2468	0	323.31	By MS/MS	By MS/MS	By MS/MS	By MS/MS	By MS/MS	By MS/MS	7.3	8	10.9	3.4	5.3	13.7
P46940	P46940	6	6	6	Ras GTPase-activating-like protein IQGAP1	IQGAP1	Ras GTPase-activating-like protein IQGAP1 OS=Homo sapiens GN=IQGAP1 PE=1 SV=1	1	6	6	6	0	1	1	5	6	0	0	1	1	5	6	0	0	1	1	5	6	0	3.1	3.1	3.1	189.25	1657	1657	0	28.556		By matching	By MS/MS	By MS/MS	By MS/MS		0	0.7	0.6	2.6	3.1	0
P46977-2;P46977	P46977-2;P46977	4;4	4;4	4;4	Dolichyl-diphosphooligosaccharide--protein glycosyltransferase subunit STT3A	STT3A	Isoform 2 of Dolichyl-diphosphooligosaccharide--protein glycosyltransferase subunit STT3A OS=Homo sapiens GN=STT3A;Dolichyl-diphosphooligosaccharide--protein glycosyltransferase subunit STT3A OS=Homo sapiens GN=STT3A PE=1 SV=2	2	4	4	4	1	1	1	4	4	2	1	1	1	4	4	2	1	1	1	4	4	2	6.5	6.5	6.5	69.588	613	613;705	0	8.84	By matching	By MS/MS	By MS/MS	By MS/MS	By MS/MS	By MS/MS	1.5	1.5	1.5	6.5	6.5	3.3
P47897-2;P47897	P47897-2;P47897	5;5	5;5	5;5	Glutamine--tRNA ligase	QARS	Isoform 2 of Glutamine--tRNA ligase OS=Homo sapiens GN=QARS;Glutamine--tRNA ligase OS=Homo sapiens GN=QARS PE=1 SV=1	2	5	5	5	0	0	2	5	5	0	0	0	2	5	5	0	0	0	2	5	5	0	6.8	6.8	6.8	86.578	764	764;775	0	8.6426			By matching	By MS/MS	By MS/MS		0	0	2.6	6.8	6.8	0
P47914	P47914	6	6	6	60S ribosomal protein L29	RPL29	60S ribosomal protein L29 OS=Homo sapiens GN=RPL29 PE=1 SV=2	1	6	6	6	6	4	5	5	5	4	6	4	5	5	5	4	6	4	5	5	5	4	25.8	25.8	25.8	17.752	159	159	0	22.349	By MS/MS	By MS/MS	By MS/MS	By MS/MS	By MS/MS	By MS/MS	25.8	21.4	23.3	22.6	22.6	21.4
P48047	P48047	1	1	1	ATP synthase subunit O, mitochondrial	ATP5O	ATP synthase subunit O, mitochondrial OS=Homo sapiens GN=ATP5O PE=1 SV=1	1	1	1	1	0	0	0	1	1	0	0	0	0	1	1	0	0	0	0	1	1	0	5.2	5.2	5.2	23.277	213	213	0.004717	1.7002				By MS/MS	By MS/MS		0	0	0	5.2	5.2	0
P48444-2;P48444	P48444-2;P48444	4;4	4;4	4;4	Coatomer subunit delta	ARCN1	Isoform 2 of Coatomer subunit delta OS=Homo sapiens GN=ARCN1;Coatomer subunit delta OS=Homo sapiens GN=ARCN1 PE=1 SV=1	2	4	4	4	1	1	1	4	3	1	1	1	1	4	3	1	1	1	1	4	3	1	11.8	11.8	11.8	47.204	423	423;511	0	15.147	By matching	By MS/MS	By matching	By MS/MS	By MS/MS	By MS/MS	2.1	2.1	2.1	11.8	6.9	2.1
P48634-2;P48634-3;P48634;P48634-4	P48634-2;P48634-3;P48634	3;3;3;1	3;3;3;1	3;3;3;1	Protein PRRC2A	PRRC2A	Isoform 2 of Protein PRRC2A OS=Homo sapiens GN=PRRC2A;Isoform 3 of Protein PRRC2A OS=Homo sapiens GN=PRRC2A;Protein PRRC2A OS=Homo sapiens GN=PRRC2A PE=1 SV=3	4	3	3	3	0	1	0	1	1	1	0	1	0	1	1	1	0	1	0	1	1	1	2.8	2.8	2.8	227.84	2144	2144;2156;2157;1533	0	4.1596		By MS/MS		By MS/MS	By MS/MS	By matching	0	0.5	0	1	1.3	0.5
P48643-2;P48643	P48643-2;P48643	1;1	1;1	1;1	T-complex protein 1 subunit epsilon	CCT5	Isoform 2 of T-complex protein 1 subunit epsilon OS=Homo sapiens GN=CCT5;T-complex protein 1 subunit epsilon OS=Homo sapiens GN=CCT5 PE=1 SV=1	2	1	1	1	0	0	0	1	1	0	0	0	0	1	1	0	0	0	0	1	1	0	2.2	2.2	2.2	49.526	448	448;541	0.00073314	2.2163				By MS/MS	By MS/MS		0	0	0	2.2	2.2	0
P48729;P48729-2	P48729;P48729-2	2;2	2;2	1;1	Casein kinase I isoform alpha	CSNK1A1	Casein kinase I isoform alpha OS=Homo sapiens GN=CSNK1A1 PE=1 SV=2;Isoform 2 of Casein kinase I isoform alpha OS=Homo sapiens GN=CSNK1A1	2	2	2	1	0	0	1	2	2	0	0	0	1	2	2	0	0	0	1	1	1	0	10.7	10.7	6.2	38.914	337	337;365	0	142.9			By matching	By MS/MS	By MS/MS		0	0	6.2	10.7	10.7	0
P48729-3	P48729-3	2	1	1	Casein kinase I isoform alpha	CSNK1A1	Isoform 3 of Casein kinase I isoform alpha OS=Homo sapiens GN=CSNK1A1	1	2	1	1	0	0	0	1	2	0	0	0	0	0	1	0	0	0	0	0	1	0	11.1	6.5	6.5	37.567	325	325	0	3.0549				By matching	By MS/MS		0	0	0	4.6	11.1	0
P48730-2;P48730	P48730-2;P48730	1;1	1;1	1;1	Casein kinase I isoform delta	CSNK1D	Isoform 2 of Casein kinase I isoform delta OS=Homo sapiens GN=CSNK1D;Casein kinase I isoform delta OS=Homo sapiens GN=CSNK1D PE=1 SV=2	2	1	1	1	1	0	0	1	1	0	1	0	0	1	1	0	1	0	0	1	1	0	3.4	3.4	3.4	46.832	409	409;415	0.0013966	1.9019	By matching			By MS/MS	By MS/MS		3.4	0	0	3.4	3.4	0
P49006	P49006	2	2	2	MARCKS-related protein	MARCKSL1	MARCKS-related protein OS=Homo sapiens GN=MARCKSL1 PE=1 SV=2	1	2	2	2	0	1	0	2	1	0	0	1	0	2	1	0	0	1	0	2	1	0	14.4	14.4	14.4	19.529	195	195	0	6.6353		By matching		By MS/MS	By MS/MS		0	6.7	0	14.4	7.7	0
P49023-2;P49023;P49023-3	P49023-2;P49023;P49023-3	1;1;1	1;1;1	1;1;1	Paxillin	PXN	Isoform Alpha of Paxillin OS=Homo sapiens GN=PXN;Paxillin OS=Homo sapiens GN=PXN PE=1 SV=3;Isoform Gamma of Paxillin OS=Homo sapiens GN=PXN	3	1	1	1	0	0	0	1	1	0	0	0	0	1	1	0	0	0	0	1	1	0	3.1	3.1	3.1	60.966	557	557;591;605	0	8.4639				By matching	By MS/MS		0	0	0	3.1	3.1	0
P49207	P49207	6	6	6	60S ribosomal protein L34	RPL34	60S ribosomal protein L34 OS=Homo sapiens GN=RPL34 PE=1 SV=3	1	6	6	6	3	4	3	4	6	3	3	4	3	4	6	3	3	4	3	4	6	3	39.3	39.3	39.3	13.293	117	117	0	16.913	By MS/MS	By MS/MS	By MS/MS	By MS/MS	By MS/MS	By MS/MS	22.2	29.9	22.2	31.6	39.3	22.2
P49327	P49327	10	10	10	Fatty acid synthase;[Acyl-carrier-protein] S-acetyltransferase;[Acyl-carrier-protein] S-malonyltransferase;3-oxoacyl-[acyl-carrier-protein] synthase;3-oxoacyl-[acyl-carrier-protein] reductase;3-hydroxyacyl-[acyl-carrier-protein] dehydratase;Enoyl-[acyl-carrier-protein] reductase;Oleoyl-[acyl-carrier-protein] hydrolase	FASN	Fatty acid synthase OS=Homo sapiens GN=FASN PE=1 SV=3	1	10	10	10	0	0	1	9	7	1	0	0	1	9	7	1	0	0	1	9	7	1	5.6	5.6	5.6	273.42	2511	2511	0	309.79			By matching	By MS/MS	By MS/MS	By MS/MS	0	0	0.7	4.9	3.5	0.7
P49368;P49368-2	P49368;P49368-2	4;3	4;3	4;3	T-complex protein 1 subunit gamma	CCT3	T-complex protein 1 subunit gamma OS=Homo sapiens GN=CCT3 PE=1 SV=4;Isoform 2 of T-complex protein 1 subunit gamma OS=Homo sapiens GN=CCT3	2	4	4	4	0	1	0	4	3	0	0	1	0	4	3	0	0	1	0	4	3	0	7.7	7.7	7.7	60.533	545	545;507	0	17.042		By matching		By MS/MS	By MS/MS		0	2	0	7.7	5.5	0
P49411	P49411	2	2	2	Elongation factor Tu, mitochondrial	TUFM	Elongation factor Tu, mitochondrial OS=Homo sapiens GN=TUFM PE=1 SV=2	1	2	2	2	0	0	0	2	2	1	0	0	0	2	2	1	0	0	0	2	2	1	4.9	4.9	4.9	49.541	452	452	0	7.3193				By MS/MS	By MS/MS	By matching	0	0	0	4.9	4.9	2.2
P49642	P49642	1	1	1	DNA primase small subunit	PRIM1	DNA primase small subunit OS=Homo sapiens GN=PRIM1 PE=1 SV=1	1	1	1	1	0	0	0	1	1	0	0	0	0	1	1	0	0	0	0	1	1	0	2.4	2.4	2.4	49.901	420	420	0.0046854	1.6778				By MS/MS	By MS/MS		0	0	0	2.4	2.4	0
P49674	P49674	2	2	2	Casein kinase I isoform epsilon	CSNK1E	Casein kinase I isoform epsilon OS=Homo sapiens GN=CSNK1E PE=1 SV=1	1	2	2	2	0	1	0	2	2	0	0	1	0	2	2	0	0	1	0	2	2	0	6.5	6.5	6.5	47.315	416	416	0	3.5057		By matching		By MS/MS	By MS/MS		0	3.4	0	6.5	6.5	0
P49711-2;P49711;Q8NI51-11;Q8NI51-6;Q8NI51-5;Q8NI51-10;Q8NI51-2;Q8NI51;Q8NI51-3;Q8NI51-7	P49711-2;P49711	5;5;1;1;1;1;1;1;1;1	5;5;1;1;1;1;1;1;1;1	5;5;1;1;1;1;1;1;1;1	Transcriptional repressor CTCF	CTCF	Isoform 2 of Transcriptional repressor CTCF OS=Homo sapiens GN=CTCF;Transcriptional repressor CTCF OS=Homo sapiens GN=CTCF PE=1 SV=1	10	5	5	5	3	5	5	0	1	4	3	5	5	0	1	4	3	5	5	0	1	4	12.8	12.8	12.8	45.997	399	399;727;299;403;422;460;573;663;665;700	0	109.71	By MS/MS	By MS/MS	By MS/MS		By matching	By MS/MS	10.8	12.8	12.8	0	2.3	12.5
P49748-2;P49748;P49748-3	P49748-2;P49748;P49748-3	2;2;2	2;2;2	2;2;2	Very long-chain specific acyl-CoA dehydrogenase, mitochondrial	ACADVL	Isoform 2 of Very long-chain specific acyl-CoA dehydrogenase, mitochondrial OS=Homo sapiens GN=ACADVL;Very long-chain specific acyl-CoA dehydrogenase, mitochondrial OS=Homo sapiens GN=ACADVL PE=1 SV=1;Isoform 3 of Very long-chain specific acyl-CoA dehydrog	3	2	2	2	0	0	0	2	2	1	0	0	0	2	2	1	0	0	0	2	2	1	2.2	2.2	2.2	68.058	633	633;655;678	0	2.8547				By MS/MS	By MS/MS	By matching	0	0	0	2.2	2.2	1.9
P49755	P49755	1	1	1	Transmembrane emp24 domain-containing protein 10	TMED10	Transmembrane emp24 domain-containing protein 10 OS=Homo sapiens GN=TMED10 PE=1 SV=2	1	1	1	1	0	0	0	1	1	0	0	0	0	1	1	0	0	0	0	1	1	0	4.6	4.6	4.6	24.976	219	219	0	2.6626				By MS/MS	By MS/MS		0	0	0	4.6	4.6	0
P49756;P49756-2;P49756-3;P49756-4	P49756	15;7;7;3	15;7;7;3	15;7;7;3	RNA-binding protein 25	RBM25	RNA-binding protein 25 OS=Homo sapiens GN=RBM25 PE=1 SV=3	4	15	15	15	11	9	7	4	4	9	11	9	7	4	4	9	11	9	7	4	4	9	21.2	21.2	21.2	100.18	843	843;294;300;164	0	86.969	By MS/MS	By MS/MS	By MS/MS	By MS/MS	By MS/MS	By MS/MS	18.5	12.9	9	5.3	5.3	12.6
P49761-3;P49761-1;P49761	P49761-3;P49761-1;P49761	1;1;1	1;1;1	1;1;1	Dual specificity protein kinase CLK3	CLK3	Isoform 3 of Dual specificity protein kinase CLK3 OS=Homo sapiens GN=CLK3;Isoform 1 of Dual specificity protein kinase CLK3 OS=Homo sapiens GN=CLK3;Dual specificity protein kinase CLK3 OS=Homo sapiens GN=CLK3 PE=1 SV=3	3	1	1	1	1	1	1	0	0	0	1	1	1	0	0	0	1	1	1	0	0	0	2.8	2.8	2.8	56.206	467	467;490;638	0.0027416	1.8088	By MS/MS	By matching	By matching				2.8	2.8	2.8	0	0	0
P49770	P49770	1	1	1	Translation initiation factor eIF-2B subunit beta	EIF2B2	Translation initiation factor eIF-2B subunit beta OS=Homo sapiens GN=EIF2B2 PE=1 SV=3	1	1	1	1	0	0	0	1	1	0	0	0	0	1	1	0	0	0	0	1	1	0	3.4	3.4	3.4	38.989	351	351	0	32.024				By MS/MS	By MS/MS		0	0	0	3.4	3.4	0
P49790-2;P49790;P49790-3	P49790-2;P49790;P49790-3	2;2;2	2;2;2	2;2;2	Nuclear pore complex protein Nup153	NUP153	Isoform 2 of Nuclear pore complex protein Nup153 OS=Homo sapiens GN=NUP153;Nuclear pore complex protein Nup153 OS=Homo sapiens GN=NUP153 PE=1 SV=2;Isoform 3 of Nuclear pore complex protein Nup153 OS=Homo sapiens GN=NUP153	3	2	2	2	1	1	2	1	2	1	1	1	2	1	2	1	1	1	2	1	2	1	2.2	2.2	2.2	149.39	1433	1433;1475;1506	0	42.232	By MS/MS	By MS/MS	By MS/MS	By MS/MS	By MS/MS	By MS/MS	0.9	0.9	2.2	1.3	2.2	0.9
P49792;Q99666;O14715;P0DJD0;P0DJD1	P49792	14;3;3;2;2	14;3;3;2;2	10;0;0;0;0	E3 SUMO-protein ligase RanBP2	RANBP2	E3 SUMO-protein ligase RanBP2 OS=Homo sapiens GN=RANBP2 PE=1 SV=2	5	14	14	10	2	1	3	10	13	3	2	1	3	10	13	3	2	1	2	7	9	2	7.1	7.1	5.4	358.2	3224	3224;1765;1765;1748;1756	0	137.71	By MS/MS	By matching	By MS/MS	By MS/MS	By MS/MS	By MS/MS	0.9	0.5	1.1	5.8	6.6	2
P49815-7;P49815-6;P49815-5;P49815-3;P49815-2;P49815-4;P49815	P49815-7;P49815-6;P49815-5;P49815-3;P49815-2;P49815-4;P49815	1;1;1;1;1;1;1	1;1;1;1;1;1;1	1;1;1;1;1;1;1	Tuberin	TSC2	Isoform 7 of Tuberin OS=Homo sapiens GN=TSC2;Isoform 6 of Tuberin OS=Homo sapiens GN=TSC2;Isoform 5 of Tuberin OS=Homo sapiens GN=TSC2;Isoform 3 of Tuberin OS=Homo sapiens GN=TSC2;Isoform 2 of Tuberin OS=Homo sapiens GN=TSC2;Isoform 4 of Tuberin OS=Homo sa	7	1	1	1	0	0	0	1	1	0	0	0	0	1	1	0	0	0	0	1	1	0	1.1	1.1	1.1	187.95	1692	1692;1704;1740;1763;1764;1784;1807	0	20.181				By MS/MS	By MS/MS		0	0	0	1.1	1.1	0
P49840	P49840	2	2	2	Glycogen synthase kinase-3 alpha	GSK3A	Glycogen synthase kinase-3 alpha OS=Homo sapiens GN=GSK3A PE=1 SV=2	1	2	2	2	0	0	0	2	2	0	0	0	0	2	2	0	0	0	0	2	2	0	8.7	8.7	8.7	50.98	483	483	0	40.463				By MS/MS	By MS/MS		0	0	0	8.7	8.7	0
P50281	P50281	3	3	3	Matrix metalloproteinase-14	MMP14	Matrix metalloproteinase-14 OS=Homo sapiens GN=MMP14 PE=1 SV=3	1	3	3	3	0	0	0	3	2	0	0	0	0	3	2	0	0	0	0	3	2	0	5.2	5.2	5.2	65.893	582	582	0	3.5023				By MS/MS	By MS/MS		0	0	0	5.2	3.4	0
P50395-2;P50395	P50395-2;P50395	1;1	1;1	1;1	Rab GDP dissociation inhibitor beta	GDI2	Isoform 2 of Rab GDP dissociation inhibitor beta OS=Homo sapiens GN=GDI2;Rab GDP dissociation inhibitor beta OS=Homo sapiens GN=GDI2 PE=1 SV=2	2	1	1	1	0	0	0	1	1	0	0	0	0	1	1	0	0	0	0	1	1	0	3.8	3.8	3.8	45.619	400	400;445	0	18.829				By MS/MS	By MS/MS		0	0	0	3.8	3.8	0
P50402	P50402	1	1	1	Emerin	EMD	Emerin OS=Homo sapiens GN=EMD PE=1 SV=1	1	1	1	1	0	1	0	1	1	0	0	1	0	1	1	0	0	1	0	1	1	0	4.7	4.7	4.7	28.994	254	254	0.0014205	2.013		By matching		By MS/MS	By MS/MS		0	4.7	0	4.7	4.7	0
P50416-2;P50416	P50416-2;P50416	1;1	1;1	1;1	Carnitine O-palmitoyltransferase 1, liver isoform	CPT1A	Isoform 2 of Carnitine O-palmitoyltransferase 1, liver isoform OS=Homo sapiens GN=CPT1A;Carnitine O-palmitoyltransferase 1, liver isoform OS=Homo sapiens GN=CPT1A PE=1 SV=2	2	1	1	1	0	0	1	1	1	0	0	0	1	1	1	0	0	0	1	1	1	0	1.9	1.9	1.9	86.238	756	756;773	0	35.213			By matching	By MS/MS	By MS/MS		0	0	1.9	1.9	1.9	0
P50552	P50552	5	5	5	Vasodilator-stimulated phosphoprotein	VASP	Vasodilator-stimulated phosphoprotein OS=Homo sapiens GN=VASP PE=1 SV=3	1	5	5	5	0	0	0	5	5	0	0	0	0	5	5	0	0	0	0	5	5	0	12.4	12.4	12.4	39.829	380	380	0	11.999				By MS/MS	By MS/MS		0	0	0	12.4	12.4	0
P50570-3;P50570-2;P50570-5;P50570-4;P50570	P50570-3;P50570-2;P50570-5;P50570-4;P50570	1;1;1;1;1	1;1;1;1;1	1;1;1;1;1	Dynamin-2	DNM2	Isoform 3 of Dynamin-2 OS=Homo sapiens GN=DNM2;Isoform 2 of Dynamin-2 OS=Homo sapiens GN=DNM2;Isoform 5 of Dynamin-2 OS=Homo sapiens GN=DNM2;Isoform 4 of Dynamin-2 OS=Homo sapiens GN=DNM2;Dynamin-2 OS=Homo sapiens GN=DNM2 PE=1 SV=2	5	1	1	1	0	0	0	1	1	0	0	0	0	1	1	0	0	0	0	1	1	0	2.1	2.1	2.1	97.553	866	866;866;869;870;870	0	14.122				By MS/MS	By MS/MS		0	0	0	2.1	2.1	0
P50579-3;P50579	P50579-3;P50579	2;2	2;2	2;2	Methionine aminopeptidase 2	METAP2	Isoform 3 of Methionine aminopeptidase 2 OS=Homo sapiens GN=METAP2;Methionine aminopeptidase 2 OS=Homo sapiens GN=METAP2 PE=1 SV=1	2	2	2	2	1	2	2	0	1	2	1	2	2	0	1	2	1	2	2	0	1	2	5.5	5.5	5.5	50.496	455	455;478	0	7.7252	By matching	By MS/MS	By MS/MS		By matching	By MS/MS	5.1	5.5	5.5	0	5.1	5.5
P50748	P50748	2	2	2	Kinetochore-associated protein 1	KNTC1	Kinetochore-associated protein 1 OS=Homo sapiens GN=KNTC1 PE=1 SV=1	1	2	2	2	0	0	0	1	2	0	0	0	0	1	2	0	0	0	0	1	2	0	1.1	1.1	1.1	250.75	2209	2209	0	5.4849				By MS/MS	By MS/MS		0	0	0	0.5	1.1	0
P50750;P50750-2	P50750;P50750-2	2;2	1;1	1;1	Cyclin-dependent kinase 9	CDK9	Cyclin-dependent kinase 9 OS=Homo sapiens GN=CDK9 PE=1 SV=3;Isoform 2 of Cyclin-dependent kinase 9 OS=Homo sapiens GN=CDK9	2	2	1	1	2	0	1	0	0	2	1	0	0	0	0	1	1	0	0	0	0	1	4.6	2.4	2.4	42.777	372	372;489	0.0052945	1.6356	By MS/MS		By matching			By MS/MS	4.6	0	2.2	0	0	4.6
P50851;P50851-2;Q8NFP9	P50851;P50851-2	5;4;1	5;4;1	5;4;1	Lipopolysaccharide-responsive and beige-like anchor protein	LRBA	Lipopolysaccharide-responsive and beige-like anchor protein OS=Homo sapiens GN=LRBA PE=1 SV=4;Isoform 2 of Lipopolysaccharide-responsive and beige-like anchor protein OS=Homo sapiens GN=LRBA	3	5	5	5	0	0	0	5	5	1	0	0	0	5	5	1	0	0	0	5	5	1	2.4	2.4	2.4	319.1	2863	2863;2851;2946	0	14.398				By MS/MS	By MS/MS	By matching	0	0	0	2.4	2.4	0.4
P50914	P50914	9	9	9	60S ribosomal protein L14	RPL14	60S ribosomal protein L14 OS=Homo sapiens GN=RPL14 PE=1 SV=4	1	9	9	9	4	6	6	8	8	6	4	6	6	8	8	6	4	6	6	8	8	6	33	33	33	23.432	215	215	0	53.696	By MS/MS	By MS/MS	By MS/MS	By MS/MS	By MS/MS	By MS/MS	17.7	24.2	24.2	27.4	27.4	26.5
P50990;P50990-2;P50990-3	P50990;P50990-2;P50990-3	3;3;2	3;3;2	3;3;2	T-complex protein 1 subunit theta	CCT8	T-complex protein 1 subunit theta OS=Homo sapiens GN=CCT8 PE=1 SV=4;Isoform 2 of T-complex protein 1 subunit theta OS=Homo sapiens GN=CCT8;Isoform 3 of T-complex protein 1 subunit theta OS=Homo sapiens GN=CCT8	3	3	3	3	1	0	0	3	3	0	1	0	0	3	3	0	1	0	0	3	3	0	6.2	6.2	6.2	59.62	548	548;529;475	0	6.3351	By matching			By MS/MS	By MS/MS		2.7	0	0	6.2	6.2	0
P50991-2;P50991	P50991-2;P50991	3;3	3;3	3;3	T-complex protein 1 subunit delta	CCT4	Isoform 2 of T-complex protein 1 subunit delta OS=Homo sapiens GN=CCT4;T-complex protein 1 subunit delta OS=Homo sapiens GN=CCT4 PE=1 SV=4	2	3	3	3	1	1	1	3	3	1	1	1	1	3	3	1	1	1	1	3	3	1	7.3	7.3	7.3	54.719	509	509;539	0	30.56	By MS/MS	By MS/MS	By MS/MS	By MS/MS	By MS/MS	By MS/MS	2.6	2.6	2.6	7.3	7.3	2.6
P51003-2;P51003	P51003-2;P51003	1;1	1;1	1;1	Poly(A) polymerase alpha	PAPOLA	Isoform 2 of Poly(A) polymerase alpha OS=Homo sapiens GN=PAPOLA;Poly(A) polymerase alpha OS=Homo sapiens GN=PAPOLA PE=1 SV=4	2	1	1	1	0	0	0	1	1	0	0	0	0	1	1	0	0	0	0	1	1	0	6	6	6	32.626	285	285;745	0	3.618				By MS/MS	By MS/MS		0	0	0	6	6	0
P51116;P51114-3	P51116;P51114-3	2;1	2;1	1;0	Fragile X mental retardation syndrome-related protein 2;Fragile X mental retardation syndrome-related protein 1	FXR2;FXR1	Fragile X mental retardation syndrome-related protein 2 OS=Homo sapiens GN=FXR2 PE=1 SV=2;Isoform 3 of Fragile X mental retardation syndrome-related protein 1 OS=Homo sapiens GN=FXR1	2	2	2	1	0	1	0	2	2	0	0	1	0	2	2	0	0	0	0	1	1	0	2.7	2.7	1.5	74.222	673	673;536	0.0020675	1.8372		By matching		By MS/MS	By MS/MS		0	1.2	0	2.7	2.7	0
P51148;P51148-2	P51148;P51148-2	2;2	2;2	2;2	Ras-related protein Rab-5C	RAB5C	Ras-related protein Rab-5C OS=Homo sapiens GN=RAB5C PE=1 SV=2;Isoform 2 of Ras-related protein Rab-5C OS=Homo sapiens GN=RAB5C	2	2	2	2	0	1	2	2	2	2	0	1	2	2	2	2	0	1	2	2	2	2	11.1	11.1	11.1	23.482	216	216;249	0	13.126		By MS/MS	By MS/MS	By MS/MS	By MS/MS	By matching	0	5.6	11.1	11.1	11.1	11.1
P51149	P51149	2	2	2	Ras-related protein Rab-7a	RAB7A	Ras-related protein Rab-7a OS=Homo sapiens GN=RAB7A PE=1 SV=1	1	2	2	2	0	0	1	1	2	2	0	0	1	1	2	2	0	0	1	1	2	2	10.6	10.6	10.6	23.489	207	207	0.0014035	1.9562			By MS/MS	By MS/MS	By MS/MS	By MS/MS	0	0	5.3	5.3	10.6	10.6
P51153	P51153	1	1	1	Ras-related protein Rab-13	RAB13	Ras-related protein Rab-13 OS=Homo sapiens GN=RAB13 PE=1 SV=1	1	1	1	1	0	0	0	1	1	1	0	0	0	1	1	1	0	0	0	1	1	1	5.9	5.9	5.9	22.774	203	203	0	2.8206				By MS/MS	By MS/MS	By matching	0	0	0	5.9	5.9	5.9
P51531-2;P51531	P51531-2;P51531	5;5	3;3	3;3	Probable global transcription activator SNF2L2	SMARCA2	Isoform Short of Probable global transcription activator SNF2L2 OS=Homo sapiens GN=SMARCA2;Probable global transcription activator SNF2L2 OS=Homo sapiens GN=SMARCA2 PE=1 SV=2	2	5	3	3	4	3	3	3	4	2	2	2	2	2	3	1	2	2	2	2	3	1	3.6	2	2	179.28	1572	1572;1590	0	20.676	By MS/MS	By MS/MS	By MS/MS	By MS/MS	By MS/MS	By MS/MS	3.1	2.2	2.2	2	2.7	1.5
P51532-5;P51532-2;P51532-3;P51532-4;P51532	P51532-5;P51532-2;P51532-3;P51532-4;P51532	7;7;7;7;7	7;7;7;7;7	5;5;5;5;5	Transcription activator BRG1	SMARCA4	Isoform 5 of Transcription activator BRG1 OS=Homo sapiens GN=SMARCA4;Isoform 2 of Transcription activator BRG1 OS=Homo sapiens GN=SMARCA4;Isoform 3 of Transcription activator BRG1 OS=Homo sapiens GN=SMARCA4;Isoform 4 of Transcription activator BRG1 OS=Homo	5	7	7	5	4	4	4	6	6	3	4	4	4	6	6	3	2	3	3	5	5	2	4.8	4.8	3.3	181.26	1613	1613;1614;1616;1617;1647	0	40.644	By MS/MS	By MS/MS	By MS/MS	By MS/MS	By MS/MS	By MS/MS	3.2	3.2	3.2	3.9	3.9	2.5
P51572;P51572-2	P51572;P51572-2	3;3	3;3	3;3	B-cell receptor-associated protein 31	BCAP31	B-cell receptor-associated protein 31 OS=Homo sapiens GN=BCAP31 PE=1 SV=3;Isoform 2 of B-cell receptor-associated protein 31 OS=Homo sapiens GN=BCAP31	2	3	3	3	0	0	0	3	3	0	0	0	0	3	3	0	0	0	0	3	3	0	9.8	9.8	9.8	27.991	246	246;313	0	4.7807				By MS/MS	By MS/MS		0	0	0	9.8	9.8	0
P51608-2;P51608	P51608-2;P51608	11;10	11;10	11;10	Methyl-CpG-binding protein 2	MECP2	Isoform B of Methyl-CpG-binding protein 2 OS=Homo sapiens GN=MECP2;Methyl-CpG-binding protein 2 OS=Homo sapiens GN=MECP2 PE=1 SV=1	2	11	11	11	8	8	10	0	0	10	8	8	10	0	0	10	8	8	10	0	0	10	26.3	26.3	26.3	53.323	498	498;486	0	55.443	By MS/MS	By MS/MS	By MS/MS			By MS/MS	21.9	21.9	26.3	0	0	26.1
P51659-3;P51659;P51659-2	P51659-3;P51659;P51659-2	5;5;5	5;5;5	5;5;5	Peroxisomal multifunctional enzyme type 2;(3R)-hydroxyacyl-CoA dehydrogenase;Enoyl-CoA hydratase 2	HSD17B4	Isoform 3 of Peroxisomal multifunctional enzyme type 2 OS=Homo sapiens GN=HSD17B4;Peroxisomal multifunctional enzyme type 2 OS=Homo sapiens GN=HSD17B4 PE=1 SV=3;Isoform 2 of Peroxisomal multifunctional enzyme type 2 OS=Homo sapiens GN=HSD17B4	3	5	5	5	0	0	0	5	5	0	0	0	0	5	5	0	0	0	0	5	5	0	10.2	10.2	10.2	77.869	718	718;736;761	0	79.952				By MS/MS	By MS/MS		0	0	0	10.2	10.2	0
P51798-2;P51798	P51798-2;P51798	1;1	1;1	1;1	H(+)/Cl(-) exchange transporter 7	CLCN7	Isoform 2 of H(+)/Cl(-) exchange transporter 7 OS=Homo sapiens GN=CLCN7;H(+)/Cl(-) exchange transporter 7 OS=Homo sapiens GN=CLCN7 PE=1 SV=2	2	1	1	1	0	0	0	1	0	0	0	0	0	1	0	0	0	0	0	1	0	0	1.4	1.4	1.4	86.025	781	781;805	0.0052666	1.6071				By MS/MS			0	0	0	1.4	0	0
P51825;P51825-3;P51825-2	P51825;P51825-3;P51825-2	2;2;2	2;2;2	2;2;2	AF4/FMR2 family member 1	AFF1	AF4/FMR2 family member 1 OS=Homo sapiens GN=AFF1 PE=1 SV=1;Isoform 3 of AF4/FMR2 family member 1 OS=Homo sapiens GN=AFF1;Isoform 2 of AF4/FMR2 family member 1 OS=Homo sapiens GN=AFF1	3	2	2	2	1	2	2	2	2	2	1	2	2	2	2	2	1	2	2	2	2	2	3.1	3.1	3.1	131.42	1210	1210;1211;1218	0	3.5786	By MS/MS	By MS/MS	By MS/MS	By matching	By matching	By MS/MS	1.4	3.1	3.1	3.1	3.1	3.1
P51858	P51858	2	2	2	Hepatoma-derived growth factor	HDGF	Hepatoma-derived growth factor OS=Homo sapiens GN=HDGF PE=1 SV=1	1	2	2	2	2	2	1	0	0	2	2	2	1	0	0	2	2	2	1	0	0	2	7.5	7.5	7.5	26.788	240	240	0	2.4903	By MS/MS	By MS/MS	By MS/MS			By MS/MS	7.5	7.5	4.2	0	0	7.5
P51965-3;P51965	P51965-3;P51965	1;1	1;1	1;1	Ubiquitin-conjugating enzyme E2 E1	UBE2E1	Isoform 3 of Ubiquitin-conjugating enzyme E2 E1 OS=Homo sapiens GN=UBE2E1;Ubiquitin-conjugating enzyme E2 E1 OS=Homo sapiens GN=UBE2E1 PE=1 SV=1	2	1	1	1	0	0	0	1	1	0	0	0	0	1	1	0	0	0	0	1	1	0	13.1	13.1	13.1	19.499	176	176;193	0.0013957	1.9004				By MS/MS	By MS/MS		0	0	0	13.1	13.1	0
P51991;P51991-2	P51991;P51991-2	3;2	3;2	3;2	Heterogeneous nuclear ribonucleoprotein A3	HNRNPA3	Heterogeneous nuclear ribonucleoprotein A3 OS=Homo sapiens GN=HNRNPA3 PE=1 SV=2;Isoform 2 of Heterogeneous nuclear ribonucleoprotein A3 OS=Homo sapiens GN=HNRNPA3	2	3	3	3	1	2	2	2	2	3	1	2	2	2	2	3	1	2	2	2	2	3	13.5	13.5	13.5	39.594	378	378;356	0	53.017	By MS/MS	By MS/MS	By MS/MS	By MS/MS	By MS/MS	By MS/MS	5.8	10.1	10.1	10.1	10.1	13.5
P52292	P52292	3	3	3	Importin subunit alpha-1	KPNA2	Importin subunit alpha-1 OS=Homo sapiens GN=KPNA2 PE=1 SV=1	1	3	3	3	0	0	0	3	3	0	0	0	0	3	3	0	0	0	0	3	3	0	8.9	8.9	8.9	57.861	529	529	0	84.681				By MS/MS	By MS/MS		0	0	0	8.9	8.9	0
P52298-3;P52298	P52298-3;P52298	1;1	1;1	1;1	Nuclear cap-binding protein subunit 2	NCBP2	Isoform 3 of Nuclear cap-binding protein subunit 2 OS=Homo sapiens GN=NCBP2;Nuclear cap-binding protein subunit 2 OS=Homo sapiens GN=NCBP2 PE=1 SV=1	2	1	1	1	1	0	0	1	1	0	1	0	0	1	1	0	1	0	0	1	1	0	10.7	10.7	10.7	11.932	103	103;156	0	6.0927	By matching			By MS/MS	By MS/MS		10.7	0	0	10.7	10.7	0
P52434-3;P52434;P52434-4	P52434-3;P52434;P52434-4	1;1;1	1;1;1	1;1;1	DNA-directed RNA polymerases I, II, and III subunit RPABC3	POLR2H	Isoform 3 of DNA-directed RNA polymerases I, II, and III subunit RPABC3 OS=Homo sapiens GN=POLR2H;DNA-directed RNA polymerases I, II, and III subunit RPABC3 OS=Homo sapiens GN=POLR2H PE=1 SV=4;Isoform 4 of DNA-directed RNA polymerases I, II, and III subuni	3	1	1	1	0	0	0	1	1	0	0	0	0	1	1	0	0	0	0	1	1	0	11.4	11.4	11.4	12.958	114	114;150;175	0.00074349	2.2747				By MS/MS	By MS/MS		0	0	0	11.4	11.4	0
P52594-2;P52594-3;P52594;P52594-4	P52594-2;P52594-3;P52594;P52594-4	1;1;1;1	1;1;1;1	1;1;1;1	Arf-GAP domain and FG repeat-containing protein 1	AGFG1	Isoform 2 of Arf-GAP domain and FG repeat-containing protein 1 OS=Homo sapiens GN=AGFG1;Isoform 3 of Arf-GAP domain and FG repeat-containing protein 1 OS=Homo sapiens GN=AGFG1;Arf-GAP domain and FG repeat-containing protein 1 OS=Homo sapiens GN=AGFG1 PE=1	4	1	1	1	0	0	0	1	1	0	0	0	0	1	1	0	0	0	0	1	1	0	4.4	4.4	4.4	54.181	522	522;560;562;584	0	3.3129				By MS/MS	By MS/MS		0	0	0	4.4	4.4	0
P52701-3;P52701;P52701-4;P52701-2	P52701-3;P52701;P52701-4;P52701-2	6;6;5;4	6;6;5;4	6;6;5;4	DNA mismatch repair protein Msh6	MSH6	Isoform 3 of DNA mismatch repair protein Msh6 OS=Homo sapiens GN=MSH6;DNA mismatch repair protein Msh6 OS=Homo sapiens GN=MSH6 PE=1 SV=2;Isoform 4 of DNA mismatch repair protein Msh6 OS=Homo sapiens GN=MSH6;Isoform GTBP-alt of DNA mismatch repair protein M	4	6	6	6	1	3	2	4	6	1	1	3	2	4	6	1	1	3	2	4	6	1	5.9	5.9	5.9	137.96	1230	1230;1360;1058;1068	0	35.699	By MS/MS	By MS/MS	By MS/MS	By MS/MS	By MS/MS	By matching	0.9	2.4	1.5	4	5.9	0.7
P52735-3;P52735-2;P52735	P52735-3;P52735-2;P52735	2;2;2	2;2;2	2;2;2	Guanine nucleotide exchange factor VAV2	VAV2	Isoform 3 of Guanine nucleotide exchange factor VAV2 OS=Homo sapiens GN=VAV2;Isoform 2 of Guanine nucleotide exchange factor VAV2 OS=Homo sapiens GN=VAV2;Guanine nucleotide exchange factor VAV2 OS=Homo sapiens GN=VAV2 PE=1 SV=2	3	2	2	2	0	0	0	2	2	0	0	0	0	2	2	0	0	0	0	2	2	0	3.6	3.6	3.6	97.031	839	839;868;878	0	7.6765				By MS/MS	By MS/MS		0	0	0	3.6	3.6	0
P52789	P52789	4	4	4	Hexokinase-2	HK2	Hexokinase-2 OS=Homo sapiens GN=HK2 PE=1 SV=2	1	4	4	4	0	1	0	4	3	0	0	1	0	4	3	0	0	1	0	4	3	0	5.7	5.7	5.7	102.38	917	917	0	6.8729		By matching		By MS/MS	By MS/MS		0	1.4	0	5.7	4	0
P52907	P52907	2	2	2	F-actin-capping protein subunit alpha-1	CAPZA1	F-actin-capping protein subunit alpha-1 OS=Homo sapiens GN=CAPZA1 PE=1 SV=3	1	2	2	2	0	0	0	2	2	0	0	0	0	2	2	0	0	0	0	2	2	0	10.8	10.8	10.8	32.922	286	286	0	29.662				By MS/MS	By MS/MS		0	0	0	10.8	10.8	0
P52926;P52926-3;P52926-6;P52926-4;P52926-5;P52926-2	P52926;P52926-3;P52926-6;P52926-4;P52926-5;P52926-2	7;5;5;5;5;5	7;5;5;5;5;5	7;5;5;5;5;5	High mobility group protein HMGI-C	HMGA2	High mobility group protein HMGI-C OS=Homo sapiens GN=HMGA2 PE=1 SV=1;Isoform 3 of High mobility group protein HMGI-C OS=Homo sapiens GN=HMGA2;Isoform 6 of High mobility group protein HMGI-C OS=Homo sapiens GN=HMGA2;Isoform 4 of High mobility group protein	6	7	7	7	7	6	6	2	4	5	7	6	6	2	4	5	7	6	6	2	4	5	60.6	60.6	60.6	11.832	109	109;86;90;92;103;106	0	133.97	By MS/MS	By MS/MS	By MS/MS	By MS/MS	By MS/MS	By MS/MS	60.6	57.8	57.8	33	57.8	50.5
P52943;P52943-2	P52943;P52943-2	1;1	1;1	1;1	Cysteine-rich protein 2	CRIP2	Cysteine-rich protein 2 OS=Homo sapiens GN=CRIP2 PE=1 SV=1;Isoform 2 of Cysteine-rich protein 2 OS=Homo sapiens GN=CRIP2	2	1	1	1	0	1	1	1	1	1	0	1	1	1	1	1	0	1	1	1	1	1	7.7	7.7	7.7	22.492	208	208;282	0	2.8675		By matching	By MS/MS	By MS/MS	By MS/MS	By matching	0	7.7	7.7	7.7	7.7	7.7
P52948-6;P52948-2;P52948-5;P52948	P52948-6;P52948-2;P52948-5;P52948	3;3;3;3	3;3;3;3	3;3;3;3	Nuclear pore complex protein Nup98-Nup96;Nuclear pore complex protein Nup98;Nuclear pore complex protein Nup96	NUP98	Isoform 6 of Nuclear pore complex protein Nup98-Nup96 OS=Homo sapiens GN=NUP98;Isoform 2 of Nuclear pore complex protein Nup98-Nup96 OS=Homo sapiens GN=NUP98;Isoform 5 of Nuclear pore complex protein Nup98-Nup96 OS=Homo sapiens GN=NUP98;Nuclear pore comple	4	3	3	3	1	0	1	3	3	0	1	0	1	3	3	0	1	0	1	3	3	0	2	2	2	186.27	1714	1714;1726;1800;1817	0	4.7125	By matching		By matching	By MS/MS	By MS/MS		0.8	0	0.6	2	2	0
P53004	P53004	1	1	1	Biliverdin reductase A	BLVRA	Biliverdin reductase A OS=Homo sapiens GN=BLVRA PE=1 SV=2	1	1	1	1	0	0	0	1	1	0	0	0	0	1	1	0	0	0	0	1	1	0	4.7	4.7	4.7	33.428	296	296	0	25.828				By MS/MS	By MS/MS		0	0	0	4.7	4.7	0
P53007	P53007	1	1	1	Tricarboxylate transport protein, mitochondrial	SLC25A1	Tricarboxylate transport protein, mitochondrial OS=Homo sapiens GN=SLC25A1 PE=1 SV=2	1	1	1	1	0	0	0	1	1	0	0	0	0	1	1	0	0	0	0	1	1	0	3.5	3.5	3.5	34.012	311	311	0	2.65				By MS/MS	By MS/MS		0	0	0	3.5	3.5	0
P53350	P53350	1	1	1	Serine/threonine-protein kinase PLK1	PLK1	Serine/threonine-protein kinase PLK1 OS=Homo sapiens GN=PLK1 PE=1 SV=1	1	1	1	1	0	0	0	1	1	1	0	0	0	1	1	1	0	0	0	1	1	1	3.2	3.2	3.2	68.254	603	603	0.00073964	2.2553				By MS/MS	By MS/MS	By matching	0	0	0	3.2	3.2	3.2
P53396;P53396-2;P53396-3	P53396;P53396-2;P53396-3	8;8;6	8;8;6	8;8;6	ATP-citrate synthase	ACLY	ATP-citrate synthase OS=Homo sapiens GN=ACLY PE=1 SV=3;Isoform 2 of ATP-citrate synthase OS=Homo sapiens GN=ACLY;Isoform 3 of ATP-citrate synthase OS=Homo sapiens GN=ACLY	3	8	8	8	0	0	3	6	7	1	0	0	3	6	7	1	0	0	3	6	7	1	8	8	8	120.84	1101	1101;1091;830	0	13.973			By MS/MS	By MS/MS	By MS/MS	By matching	0	0	2.5	6.3	6.8	0.9
P53597	P53597	1	1	1	Succinyl-CoA ligase [ADP/GDP-forming] subunit alpha, mitochondrial	SUCLG1	Succinate--CoA ligase [ADP/GDP-forming] subunit alpha, mitochondrial OS=Homo sapiens GN=SUCLG1 PE=1 SV=4	1	1	1	1	1	1	0	1	1	1	1	1	0	1	1	1	1	1	0	1	1	1	4.6	4.6	4.6	36.249	346	346	0	4.6846	By MS/MS	By matching		By MS/MS	By MS/MS	By MS/MS	4.6	4.6	0	4.6	4.6	4.6
P53618	P53618	5	5	5	Coatomer subunit beta	COPB1	Coatomer subunit beta OS=Homo sapiens GN=COPB1 PE=1 SV=3	1	5	5	5	0	1	0	5	5	0	0	1	0	5	5	0	0	1	0	5	5	0	6.6	6.6	6.6	107.14	953	953	0	7.9095		By matching		By MS/MS	By MS/MS		0	0.9	0	6.6	6.6	0
P53621;P53621-2	P53621;P53621-2	6;6	6;6	6;6	Coatomer subunit alpha;Xenin;Proxenin	COPA	Coatomer subunit alpha OS=Homo sapiens GN=COPA PE=1 SV=2;Isoform 2 of Coatomer subunit alpha OS=Homo sapiens GN=COPA	2	6	6	6	1	2	3	5	6	3	1	2	3	5	6	3	1	2	3	5	6	3	4.3	4.3	4.3	138.34	1224	1224;1233	0	31.96	By MS/MS	By MS/MS	By MS/MS	By MS/MS	By MS/MS	By MS/MS	1	2	3.2	3.8	4.3	3.2
P53814-5;P53814;P53814-6;P53814-2	P53814-5;P53814;P53814-6	5;5;5;2	5;5;5;2	5;5;5;2	Smoothelin	SMTN	Isoform B2 of Smoothelin OS=Homo sapiens GN=SMTN;Smoothelin OS=Homo sapiens GN=SMTN PE=1 SV=7;Isoform B3 of Smoothelin OS=Homo sapiens GN=SMTN	4	5	5	5	0	0	0	4	5	0	0	0	0	4	5	0	0	0	0	4	5	0	8	8	8	98.918	915	915;917;940;461	0	14.059				By MS/MS	By MS/MS		0	0	0	6.6	8	0
P53985	P53985	1	1	1	Monocarboxylate transporter 1	SLC16A1	Monocarboxylate transporter 1 OS=Homo sapiens GN=SLC16A1 PE=1 SV=3	1	1	1	1	0	0	0	1	1	0	0	0	0	1	1	0	0	0	0	1	1	0	4	4	4	53.944	500	500	0	40.334				By MS/MS	By MS/MS		0	0	0	4	4	0
P53992;P53992-2	P53992;P53992-2	2;1	2;1	2;1	Protein transport protein Sec24C	SEC24C	Protein transport protein Sec24C OS=Homo sapiens GN=SEC24C PE=1 SV=3;Isoform 2 of Protein transport protein Sec24C OS=Homo sapiens GN=SEC24C	2	2	2	2	1	1	2	1	1	2	1	1	2	1	1	2	1	1	2	1	1	2	2.7	2.7	2.7	118.32	1094	1094;342	0	3.9735	By MS/MS	By MS/MS	By matching	By MS/MS	By MS/MS	By MS/MS	1.3	1.3	2.7	1.4	1.3	2.7
P53999	P53999	9	9	9	Activated RNA polymerase II transcriptional coactivator p15	SUB1	Activated RNA polymerase II transcriptional coactivator p15 OS=Homo sapiens GN=SUB1 PE=1 SV=3	1	9	9	9	7	8	7	3	3	8	7	8	7	3	3	8	7	8	7	3	3	8	51.2	51.2	51.2	14.395	127	127	0	50.064	By MS/MS	By MS/MS	By MS/MS	By MS/MS	By MS/MS	By MS/MS	39.4	40.2	29.9	23.6	23.6	40.9
P54132	P54132	2	2	2	Bloom syndrome protein	BLM	Bloom syndrome protein OS=Homo sapiens GN=BLM PE=1 SV=1	1	2	2	2	0	0	0	2	2	0	0	0	0	2	2	0	0	0	0	2	2	0	1.8	1.8	1.8	159	1417	1417	0	4.9378				By MS/MS	By MS/MS		0	0	0	1.8	1.8	0
P54136;P54136-2	P54136;P54136-2	6;4	6;4	6;4	Arginine--tRNA ligase, cytoplasmic	RARS	Arginine--tRNA ligase, cytoplasmic OS=Homo sapiens GN=RARS PE=1 SV=2;Isoform Monomeric of Arginine--tRNA ligase, cytoplasmic OS=Homo sapiens GN=RARS	2	6	6	6	0	0	2	5	5	2	0	0	2	5	5	2	0	0	2	5	5	2	11.4	11.4	11.4	75.378	660	660;588	0	27.02			By matching	By MS/MS	By MS/MS	By MS/MS	0	0	3	8.3	8.9	3
P54646;Q13131;Q13131-2	P54646;Q13131;Q13131-2	1;1;1	1;1;1	1;1;1	5-AMP-activated protein kinase catalytic subunit alpha-2;5-AMP-activated protein kinase catalytic subunit alpha-1	PRKAA2;PRKAA1	5-AMP-activated protein kinase catalytic subunit alpha-2 OS=Homo sapiens GN=PRKAA2 PE=1 SV=2;5-AMP-activated protein kinase catalytic subunit alpha-1 OS=Homo sapiens GN=PRKAA1 PE=1 SV=4;Isoform 2 of 5-AMP-activated protein kinase catalytic subunit alpha	3	1	1	1	0	0	0	1	1	0	0	0	0	1	1	0	0	0	0	1	1	0	3.1	3.1	3.1	62.319	552	552;559;574	0	3.4755				By MS/MS	By MS/MS		0	0	0	3.1	3.1	0
P54886-2;P54886	P54886-2;P54886	4;4	4;4	4;4	Delta-1-pyrroline-5-carboxylate synthase;Glutamate 5-kinase;Gamma-glutamyl phosphate reductase	ALDH18A1	Isoform Short of Delta-1-pyrroline-5-carboxylate synthase OS=Homo sapiens GN=ALDH18A1;Delta-1-pyrroline-5-carboxylate synthase OS=Homo sapiens GN=ALDH18A1 PE=1 SV=2	2	4	4	4	0	0	0	4	4	0	0	0	0	4	4	0	0	0	0	4	4	0	5.2	5.2	5.2	87.088	793	793;795	0	10.569				By MS/MS	By MS/MS		0	0	0	5.2	5.2	0
P55060-4;P55060-3;P55060;P55060-2	P55060-4;P55060-3;P55060	9;9;9;1	9;9;9;1	9;9;9;1	Exportin-2	CSE1L	Isoform 4 of Exportin-2 OS=Homo sapiens GN=CSE1L;Isoform 3 of Exportin-2 OS=Homo sapiens GN=CSE1L;Exportin-2 OS=Homo sapiens GN=CSE1L PE=1 SV=3	4	9	9	9	0	1	1	8	8	1	0	1	1	8	8	1	0	1	1	8	8	1	11.4	11.4	11.4	103.88	915	915;945;971;195	0	184.04		By matching	By matching	By MS/MS	By MS/MS	By matching	0	1.4	1.2	9.7	10.4	1.4
P55081	P55081	3	3	3	Microfibrillar-associated protein 1	MFAP1	Microfibrillar-associated protein 1 OS=Homo sapiens GN=MFAP1 PE=1 SV=2	1	3	3	3	3	2	1	1	1	2	3	2	1	1	1	2	3	2	1	1	1	2	6.4	6.4	6.4	51.958	439	439	0	4.9458	By MS/MS	By MS/MS	By matching	By MS/MS	By MS/MS	By matching	6.4	6.4	1.8	1.8	1.8	6.4
P55197-1;P55197	P55197-1;P55197	2;2	2;2	2;2	Protein AF-10	MLLT10	Isoform 1 of Protein AF-10 OS=Homo sapiens GN=MLLT10;Protein AF-10 OS=Homo sapiens GN=MLLT10 PE=1 SV=2	2	2	2	2	1	0	0	0	0	2	1	0	0	0	0	2	1	0	0	0	0	2	3.3	3.3	3.3	109.02	1027	1027;1068	0	10.096	By matching					By MS/MS	1.4	0	0	0	0	3.3
P55198	P55198	2	2	2	Protein AF-17	MLLT6	Protein AF-17 OS=Homo sapiens GN=MLLT6 PE=1 SV=2	1	2	2	2	1	2	2	0	0	2	1	2	2	0	0	2	1	2	2	0	0	2	3	3	3	112.07	1093	1093	0	4.2528	By MS/MS	By MS/MS	By MS/MS			By MS/MS	2.1	3	3	0	0	3
P55265-5;P55265-3;P55265-2;P55265;P55265-4	P55265-5;P55265-3;P55265-2;P55265;P55265-4	1;1;1;1;1	1;1;1;1;1	1;1;1;1;1	Double-stranded RNA-specific adenosine deaminase	ADAR	Isoform 5 of Double-stranded RNA-specific adenosine deaminase OS=Homo sapiens GN=ADAR;Isoform 3 of Double-stranded RNA-specific adenosine deaminase OS=Homo sapiens GN=ADAR;Isoform 2 of Double-stranded RNA-specific adenosine deaminase OS=Homo sapiens GN=ADA	5	1	1	1	0	0	0	1	1	0	0	0	0	1	1	0	0	0	0	1	1	0	1.3	1.3	1.3	103.64	931	931;1181;1200;1226;1269	0	3.0128				By MS/MS	By MS/MS		0	0	0	1.3	1.3	0
P55884;P55884-2	P55884;P55884-2	2;2	2;2	2;2	Eukaryotic translation initiation factor 3 subunit B	EIF3B	Eukaryotic translation initiation factor 3 subunit B OS=Homo sapiens GN=EIF3B PE=1 SV=3;Isoform 2 of Eukaryotic translation initiation factor 3 subunit B OS=Homo sapiens GN=EIF3B	2	2	2	2	0	0	0	2	2	0	0	0	0	2	2	0	0	0	0	2	2	0	3.4	3.4	3.4	92.48	814	814;873	0	15.078				By MS/MS	By MS/MS		0	0	0	3.4	3.4	0
P56134-3;P56134	P56134-3;P56134	3;3	3;3	3;3	ATP synthase subunit f, mitochondrial	ATP5J2	Isoform 3 of ATP synthase subunit f, mitochondrial OS=Homo sapiens GN=ATP5J2;ATP synthase subunit f, mitochondrial OS=Homo sapiens GN=ATP5J2 PE=1 SV=3	2	3	3	3	0	2	1	3	3	2	0	2	1	3	3	2	0	2	1	3	3	2	29.1	29.1	29.1	6.2953	55	55;94	0	9.7647		By MS/MS	By MS/MS	By MS/MS	By MS/MS	By MS/MS	0	29.1	29.1	29.1	29.1	29.1
P56134-4;P56134-2	P56134-4;P56134-2	2;2	2;2	2;2	ATP synthase subunit f, mitochondrial	ATP5J2	Isoform 4 of ATP synthase subunit f, mitochondrial OS=Homo sapiens GN=ATP5J2;Isoform 2 of ATP synthase subunit f, mitochondrial OS=Homo sapiens GN=ATP5J2	2	2	2	2	0	0	0	2	2	0	0	0	0	2	2	0	0	0	0	2	2	0	20.4	20.4	20.4	5.7407	49	49;88	0	2.5477				By MS/MS	By MS/MS		0	0	0	20.4	20.4	0
P56181-2	P56181-2	4	4	4			Isoform 2 of NADH dehydrogenase [ubiquinone] flavoprotein 3, mitochondrial OS=Homo sapiens GN=NDUFV3	1	4	4	4	1	2	3	0	0	4	1	2	3	0	0	4	1	2	3	0	0	4	12.3	12.3	12.3	50.983	473	473	0	40.714	By MS/MS	By MS/MS	By MS/MS			By MS/MS	2.5	5.5	8.2	0	0	12.3
P56192;P56192-2	P56192	6;2	6;2	6;2	Methionine--tRNA ligase, cytoplasmic	MARS	Methionine--tRNA ligase, cytoplasmic OS=Homo sapiens GN=MARS PE=1 SV=2	2	6	6	6	1	4	2	3	5	3	1	4	2	3	5	3	1	4	2	3	5	3	6.3	6.3	6.3	101.11	900	900;546	0	11.418	By MS/MS	By matching	By matching	By MS/MS	By MS/MS	By MS/MS	1.3	5.1	2.2	3.8	6.3	3.8
P56589	P56589	1	1	1	Peroxisomal biogenesis factor 3	PEX3	Peroxisomal biogenesis factor 3 OS=Homo sapiens GN=PEX3 PE=1 SV=1	1	1	1	1	0	0	1	1	1	0	0	0	1	1	1	0	0	0	1	1	1	0	2.7	2.7	2.7	42.139	373	373	0.0047233	1.7011			By matching	By MS/MS	By MS/MS		0	0	2.7	2.7	2.7	0
P57740;P57740-2	P57740;P57740-2	2;1	2;1	2;1	Nuclear pore complex protein Nup107	NUP107	Nuclear pore complex protein Nup107 OS=Homo sapiens GN=NUP107 PE=1 SV=1;Isoform 2 of Nuclear pore complex protein Nup107 OS=Homo sapiens GN=NUP107	2	2	2	2	0	0	0	2	1	0	0	0	0	2	1	0	0	0	0	2	1	0	3	3	3	106.37	925	925;896	0	11.209				By MS/MS	By MS/MS		0	0	0	3	1.2	0
P60228	P60228	6	6	6	Eukaryotic translation initiation factor 3 subunit E	EIF3E	Eukaryotic translation initiation factor 3 subunit E OS=Homo sapiens GN=EIF3E PE=1 SV=1	1	6	6	6	1	2	1	4	5	1	1	2	1	4	5	1	1	2	1	4	5	1	13.9	13.9	13.9	52.22	445	445	0	11.411	By MS/MS	By MS/MS	By matching	By MS/MS	By MS/MS	By matching	2	4.7	2.5	8.5	12.1	2.5
P60468	P60468	3	3	3	Protein transport protein Sec61 subunit beta	SEC61B	Protein transport protein Sec61 subunit beta OS=Homo sapiens GN=SEC61B PE=1 SV=2	1	3	3	3	1	1	2	2	3	1	1	1	2	2	3	1	1	1	2	2	3	1	37.5	37.5	37.5	9.9743	96	96	0	5.9851	By MS/MS	By MS/MS	By MS/MS	By MS/MS	By MS/MS	By matching	15.6	15.6	27.1	27.1	37.5	15.6
P60602-2;P60602	P60602-2;P60602	1;1	1;1	1;1	Reactive oxygen species modulator 1	ROMO1	Isoform 2 of Reactive oxygen species modulator 1 OS=Homo sapiens GN=ROMO1;Reactive oxygen species modulator 1 OS=Homo sapiens GN=ROMO1 PE=1 SV=1	2	1	1	1	0	0	0	1	1	0	0	0	0	1	1	0	0	0	0	1	1	0	28.8	28.8	28.8	5.8998	59	59;79	0.0077922	1.4986				By MS/MS	By MS/MS		0	0	0	28.8	28.8	0
P63261;P60709;P63267;P68133;P68032;P62736;P63267-2;Q562R1;Q6S8J3;A5A3E0;Q9BYX7	P63261;P60709;P63267;P68133;P68032;P62736	10;10;7;7;7;7;4;3;3;3;2	10;10;7;7;7;7;4;3;3;3;2	8;8;6;6;6;6;3;3;1;1;1	Actin, cytoplasmic 2;Actin, cytoplasmic 2, N-terminally processed;Actin, cytoplasmic 1;Actin, cytoplasmic 1, N-terminally processed;Actin, gamma-enteric smooth muscle;Actin, alpha skeletal muscle;Actin, alpha cardiac muscle 1;Actin, aortic smooth muscle	ACTG1;ACTB;ACTG2;ACTA1;ACTC1;ACTA2	Actin, cytoplasmic 2 OS=Homo sapiens GN=ACTG1 PE=1 SV=1;Actin, cytoplasmic 1 OS=Homo sapiens GN=ACTB PE=1 SV=1;Actin, gamma-enteric smooth muscle OS=Homo sapiens GN=ACTG2 PE=1 SV=1;Actin, alpha skeletal muscle OS=Homo sapiens GN=ACTA1 PE=1 SV=1;Actin, alph	11	10	10	8	7	6	8	10	10	6	7	6	8	10	10	6	5	5	6	8	8	5	29.1	29.1	22.9	41.792	375	375;375;376;377;377;377;333;376;1075;1075;375	0	35.151	By MS/MS	By MS/MS	By MS/MS	By MS/MS	By MS/MS	By MS/MS	19.7	13.6	21.9	29.1	29.1	15.7
P60842-2;P60842;Q14240;Q14240-2	P60842-2;P60842;Q14240;Q14240-2	3;3;3;3	2;2;2;2	2;2;2;2	Eukaryotic initiation factor 4A-I;Eukaryotic initiation factor 4A-II;Eukaryotic initiation factor 4A-II, N-terminally processed	EIF4A1;EIF4A2	Isoform 2 of Eukaryotic initiation factor 4A-I OS=Homo sapiens GN=EIF4A1;Eukaryotic initiation factor 4A-I OS=Homo sapiens GN=EIF4A1 PE=1 SV=1;Eukaryotic initiation factor 4A-II OS=Homo sapiens GN=EIF4A2 PE=1 SV=2;Isoform 2 of Eukaryotic initiation factor	4	3	2	2	1	1	1	2	3	1	1	1	1	2	2	1	1	1	1	2	2	1	8.4	6.3	6.3	39.548	347	347;406;407;408	0	17.11	By matching	By matching	By matching	By MS/MS	By MS/MS	By matching	2.3	2.3	2.3	6.3	8.4	2.3
P60866;P60866-2	P60866;P60866-2	3;3	3;3	3;3	40S ribosomal protein S20	RPS20	40S ribosomal protein S20 OS=Homo sapiens GN=RPS20 PE=1 SV=1;Isoform 2 of 40S ribosomal protein S20 OS=Homo sapiens GN=RPS20	2	3	3	3	0	0	0	3	1	0	0	0	0	3	1	0	0	0	0	3	1	0	22.7	22.7	22.7	13.373	119	119;142	0	5.853				By MS/MS	By MS/MS		0	0	0	22.7	9.2	0
P60891-2;P60891	P60891-2;P60891	2;2	2;2	2;2	Ribose-phosphate pyrophosphokinase 1	PRPS1	Isoform 2 of Ribose-phosphate pyrophosphokinase 1 OS=Homo sapiens GN=PRPS1;Ribose-phosphate pyrophosphokinase 1 OS=Homo sapiens GN=PRPS1 PE=1 SV=2	2	2	2	2	0	0	0	2	2	0	0	0	0	2	2	0	0	0	0	2	2	0	5.6	5.6	5.6	27.526	251	251;318	0	3.7403				By MS/MS	By MS/MS		0	0	0	5.6	5.6	0
P60953	P60953	2	1	1	Cell division control protein 42 homolog	CDC42	Cell division control protein 42 homolog OS=Homo sapiens GN=CDC42 PE=1 SV=2	1	2	1	1	0	1	0	2	2	1	0	0	0	1	1	0	0	0	0	1	1	0	11	5.2	5.2	21.258	191	191	0.00072622	2.1467		By matching		By MS/MS	By MS/MS	By matching	0	5.8	0	11	11	5.8
P60981;P60981-2	P60981;P60981-2	2;1	2;1	2;1	Destrin	DSTN	Destrin OS=Homo sapiens GN=DSTN PE=1 SV=3;Isoform 2 of Destrin OS=Homo sapiens GN=DSTN	2	2	2	2	0	0	0	2	2	1	0	0	0	2	2	1	0	0	0	2	2	1	12.1	12.1	12.1	18.506	165	165;148	0	4.3251				By MS/MS	By MS/MS	By MS/MS	0	0	0	12.1	12.1	7.3
P61006;P61006-2	P61006	3;1	3;1	3;1	Ras-related protein Rab-8A	RAB8A	Ras-related protein Rab-8A OS=Homo sapiens GN=RAB8A PE=1 SV=1	2	3	3	3	1	3	0	2	3	0	1	3	0	2	3	0	1	3	0	2	3	0	13	13	13	23.668	207	207;207	0	59.756	By matching	By matching		By MS/MS	By MS/MS		5.8	13	0	7.2	13	0
P61020-2;P61020	P61020-2;P61020	1;1	1;1	1;1	Ras-related protein Rab-5B	RAB5B	Isoform 2 of Ras-related protein Rab-5B OS=Homo sapiens GN=RAB5B;Ras-related protein Rab-5B OS=Homo sapiens GN=RAB5B PE=1 SV=1	2	1	1	1	0	0	0	1	1	0	0	0	0	1	1	0	0	0	0	1	1	0	6.9	6.9	6.9	19.09	174	174;215	0.002736	1.7965				By MS/MS	By MS/MS		0	0	0	6.9	6.9	0
P61026	P61026	1	1	1	Ras-related protein Rab-10	RAB10	Ras-related protein Rab-10 OS=Homo sapiens GN=RAB10 PE=1 SV=1	1	1	1	1	0	0	0	1	0	0	0	0	0	1	0	0	0	0	0	1	0	0	6	6	6	22.541	200	200	0.0014184	2.0068				By MS/MS			0	0	0	6	0	0
P62837-2;P62837;P61077;P61077-2;P61077-3	P62837-2;P62837;P61077;P61077-2;P61077-3	1;1;1;1;1	1;1;1;1;1	1;1;1;1;1	Ubiquitin-conjugating enzyme E2 D2;Ubiquitin-conjugating enzyme E2 D3	UBE2D2;UBE2D3	Isoform 2 of Ubiquitin-conjugating enzyme E2 D2 OS=Homo sapiens GN=UBE2D2;Ubiquitin-conjugating enzyme E2 D2 OS=Homo sapiens GN=UBE2D2 PE=1 SV=1;Ubiquitin-conjugating enzyme E2 D3 OS=Homo sapiens GN=UBE2D3 PE=1 SV=1;Isoform 2 of Ubiquitin-conjugating enzym	5	1	1	1	0	0	0	1	1	0	0	0	0	1	1	0	0	0	0	1	1	0	9.3	9.3	9.3	13.635	118	118;147;147;148;149	0	2.9382				By MS/MS	By MS/MS		0	0	0	9.3	9.3	0
P61081	P61081	3	3	3	NEDD8-conjugating enzyme Ubc12	UBE2M	NEDD8-conjugating enzyme Ubc12 OS=Homo sapiens GN=UBE2M PE=1 SV=1	1	3	3	3	3	2	2	3	3	3	3	2	2	3	3	3	3	2	2	3	3	3	14.8	14.8	14.8	20.9	183	183	0	4.9113	By MS/MS	By MS/MS	By MS/MS	By MS/MS	By MS/MS	By MS/MS	14.8	10.4	9.3	14.8	14.8	14.8
P61088;Q5JXB2	P61088;Q5JXB2	1;1	1;1	1;1	Ubiquitin-conjugating enzyme E2 N;Putative ubiquitin-conjugating enzyme E2 N-like	UBE2N;UBE2NL	Ubiquitin-conjugating enzyme E2 N OS=Homo sapiens GN=UBE2N PE=1 SV=1;Putative ubiquitin-conjugating enzyme E2 N-like OS=Homo sapiens GN=UBE2NL PE=1 SV=1	2	1	1	1	1	1	0	1	1	0	1	1	0	1	1	0	1	1	0	1	1	0	7.2	7.2	7.2	17.138	152	152;153	0	3.4879	By matching	By matching		By MS/MS	By MS/MS		7.2	7.2	0	7.2	7.2	0
P61158	P61158	2	2	2	Actin-related protein 3	ACTR3	Actin-related protein 3 OS=Homo sapiens GN=ACTR3 PE=1 SV=3	1	2	2	2	0	0	0	2	2	0	0	0	0	2	2	0	0	0	0	2	2	0	6.7	6.7	6.7	47.371	418	418	0	11.169				By MS/MS	By MS/MS		0	0	0	6.7	6.7	0
P61221	P61221	5	5	5	ATP-binding cassette sub-family E member 1	ABCE1	ATP-binding cassette sub-family E member 1 OS=Homo sapiens GN=ABCE1 PE=1 SV=1	1	5	5	5	0	2	2	4	5	2	0	2	2	4	5	2	0	2	2	4	5	2	9	9	9	67.314	599	599	0	82.353		By matching	By matching	By MS/MS	By MS/MS	By MS/MS	0	3.7	3.7	7.3	9	3.3
P61247	P61247	6	6	6	40S ribosomal protein S3a	RPS3A	40S ribosomal protein S3a OS=Homo sapiens GN=RPS3A PE=1 SV=2	1	6	6	6	2	1	2	5	6	3	2	1	2	5	6	3	2	1	2	5	6	3	15.5	15.5	15.5	29.945	264	264	0	11.978	By MS/MS	By MS/MS	By MS/MS	By MS/MS	By MS/MS	By MS/MS	6.4	3.4	12.5	15.5	15.5	12.5
P61254;Q9UNX3	P61254;Q9UNX3	5;3	5;3	5;3	60S ribosomal protein L26;60S ribosomal protein L26-like 1	RPL26;RPL26L1	60S ribosomal protein L26 OS=Homo sapiens GN=RPL26 PE=1 SV=1;60S ribosomal protein L26-like 1 OS=Homo sapiens GN=RPL26L1 PE=1 SV=1	2	5	5	5	1	2	5	4	5	5	1	2	5	4	5	5	1	2	5	4	5	5	20	20	20	17.258	145	145;145	0	7.9199	By matching	By MS/MS	By MS/MS	By MS/MS	By MS/MS	By MS/MS	5.5	6.2	20	13.8	20	20
P61313;P61313-2	P61313;P61313-2	3;2	3;2	3;2	60S ribosomal protein L15	RPL15	60S ribosomal protein L15 OS=Homo sapiens GN=RPL15 PE=1 SV=2;Isoform 2 of 60S ribosomal protein L15 OS=Homo sapiens GN=RPL15	2	3	3	3	1	1	2	2	2	3	1	1	2	2	2	3	1	1	2	2	2	3	12.3	12.3	12.3	24.146	204	204;145	0	6.8351	By MS/MS	By MS/MS	By MS/MS	By MS/MS	By MS/MS	By MS/MS	4.4	4.4	7.8	8.8	8.8	12.3
P61353	P61353	3	3	3	60S ribosomal protein L27	RPL27	60S ribosomal protein L27 OS=Homo sapiens GN=RPL27 PE=1 SV=2	1	3	3	3	2	2	3	2	2	3	2	2	3	2	2	3	2	2	3	2	2	3	18.4	18.4	18.4	15.798	136	136	0	5.7053	By MS/MS	By MS/MS	By MS/MS	By MS/MS	By MS/MS	By MS/MS	14.7	10.3	18.4	10.3	10.3	18.4
P61513;A6NKH3	P61513	3;1	3;1	3;1	60S ribosomal protein L37a	RPL37A	60S ribosomal protein L37a OS=Homo sapiens GN=RPL37A PE=1 SV=2	2	3	3	3	1	3	1	1	1	2	1	3	1	1	1	2	1	3	1	1	1	2	34.8	34.8	34.8	10.275	92	92;93	0	23.375	By MS/MS	By MS/MS	By MS/MS	By MS/MS	By MS/MS	By MS/MS	19.6	34.8	19.6	19.6	19.6	27.2
P61619;P61619-3;Q9H9S3-2;Q9H9S3-3;Q9H9S3	P61619;P61619-3;Q9H9S3-2;Q9H9S3-3;Q9H9S3	2;1;1;1;1	2;1;1;1;1	2;1;1;1;1	Protein transport protein Sec61 subunit alpha isoform 1;Protein transport protein Sec61 subunit alpha isoform 2	SEC61A1;SEC61A2	Protein transport protein Sec61 subunit alpha isoform 1 OS=Homo sapiens GN=SEC61A1 PE=1 SV=2;Isoform 3 of Protein transport protein Sec61 subunit alpha isoform 1 OS=Homo sapiens GN=SEC61A1;Isoform 2 of Protein transport protein Sec61 subunit alpha isoform	5	2	2	2	0	0	0	2	2	1	0	0	0	2	2	1	0	0	0	2	2	1	4.4	4.4	4.4	52.264	476	476;356;437;454;476	0	6.0549				By MS/MS	By MS/MS	By matching	0	0	0	4.4	4.4	2.3
P61803	P61803	1	1	1	Dolichyl-diphosphooligosaccharide--protein glycosyltransferase subunit DAD1	DAD1	Dolichyl-diphosphooligosaccharide--protein glycosyltransferase subunit DAD1 OS=Homo sapiens GN=DAD1 PE=1 SV=3	1	1	1	1	0	0	0	1	1	1	0	0	0	1	1	1	0	0	0	1	1	1	8.8	8.8	8.8	12.497	113	113	0	2.5273				By MS/MS	By MS/MS	By MS/MS	0	0	0	8.8	8.8	8.8
P61956-2;P61956;Q6EEV6;P55854;P55854-2	P61956-2;P61956	3;3;1;1;1	3;3;1;1;1	3;3;1;1;1	Small ubiquitin-related modifier 2	SUMO2	Isoform 2 of Small ubiquitin-related modifier 2 OS=Homo sapiens GN=SUMO2;Small ubiquitin-related modifier 2 OS=Homo sapiens GN=SUMO2 PE=1 SV=3	5	3	3	3	3	3	3	3	3	3	3	3	3	3	3	3	3	3	3	3	3	3	45.1	45.1	45.1	8.1111	71	71;95;95;103;141	0	15.405	By MS/MS	By MS/MS	By MS/MS	By MS/MS	By MS/MS	By MS/MS	45.1	45.1	45.1	45.1	45.1	45.1
P61964	P61964	3	3	3	WD repeat-containing protein 5	WDR5	WD repeat-containing protein 5 OS=Homo sapiens GN=WDR5 PE=1 SV=1	1	3	3	3	2	3	2	1	2	3	2	3	2	1	2	3	2	3	2	1	2	3	11.4	11.4	11.4	36.588	334	334	0	22.064	By MS/MS	By MS/MS	By MS/MS	By MS/MS	By MS/MS	By MS/MS	7.2	11.4	7.2	3.9	7.2	11.4
P61966	P61966	1	1	1	AP-1 complex subunit sigma-1A	AP1S1	AP-1 complex subunit sigma-1A OS=Homo sapiens GN=AP1S1 PE=1 SV=1	1	1	1	1	0	0	0	1	1	0	0	0	0	1	1	0	0	0	0	1	1	0	10.1	10.1	10.1	18.733	158	158	0	37.416				By MS/MS	By MS/MS		0	0	0	10.1	10.1	0
P61978-3;P61978;P61978-2	P61978-3;P61978;P61978-2	7;7;7	7;7;7	7;7;7	Heterogeneous nuclear ribonucleoprotein K	HNRNPK	Isoform 3 of Heterogeneous nuclear ribonucleoprotein K OS=Homo sapiens GN=HNRNPK;Heterogeneous nuclear ribonucleoprotein K OS=Homo sapiens GN=HNRNPK PE=1 SV=1;Isoform 2 of Heterogeneous nuclear ribonucleoprotein K OS=Homo sapiens GN=HNRNPK	3	7	7	7	2	4	3	6	7	4	2	4	3	6	7	4	2	4	3	6	7	4	16.1	16.1	16.1	48.562	440	440;463;464	0	19.967	By MS/MS	By MS/MS	By MS/MS	By MS/MS	By MS/MS	By MS/MS	5.9	10.5	6.4	14.1	16.1	10.2
P62070-2;P62070-3;P62070;P62070-4	P62070-2;P62070-3;P62070;P62070-4	1;1;1;1	1;1;1;1	1;1;1;1	Ras-related protein R-Ras2	RRAS2	Isoform 2 of Ras-related protein R-Ras2 OS=Homo sapiens GN=RRAS2;Isoform 3 of Ras-related protein R-Ras2 OS=Homo sapiens GN=RRAS2;Ras-related protein R-Ras2 OS=Homo sapiens GN=RRAS2 PE=1 SV=1;Isoform 4 of Ras-related protein R-Ras2 OS=Homo sapiens GN=RRAS2	4	1	1	1	0	0	0	1	1	0	0	0	0	1	1	0	0	0	0	1	1	0	9.4	9.4	9.4	15.094	127	127;169;204;210	0	31.892				By MS/MS	By MS/MS		0	0	0	9.4	9.4	0
P62081	P62081	2	2	2	40S ribosomal protein S7	RPS7	40S ribosomal protein S7 OS=Homo sapiens GN=RPS7 PE=1 SV=1	1	2	2	2	0	1	1	2	2	0	0	1	1	2	2	0	0	1	1	2	2	0	9.3	9.3	9.3	22.127	194	194	0.0027248	1.782		By MS/MS	By MS/MS	By MS/MS	By MS/MS		0	4.1	4.1	9.3	9.3	0
P62136;P62136-2;P62136-3;P36873;P62140;P36873-2	P62136;P62136-2;P62136-3;P36873;P62140;P36873-2	2;2;1;1;1;1	2;2;1;1;1;1	2;2;1;1;1;1	Serine/threonine-protein phosphatase PP1-alpha catalytic subunit;Serine/threonine-protein phosphatase PP1-gamma catalytic subunit;Serine/threonine-protein phosphatase PP1-beta catalytic subunit	PPP1CA;PPP1CC;PPP1CB	Serine/threonine-protein phosphatase PP1-alpha catalytic subunit OS=Homo sapiens GN=PPP1CA PE=1 SV=1;Isoform 2 of Serine/threonine-protein phosphatase PP1-alpha catalytic subunit OS=Homo sapiens GN=PPP1CA;Isoform 3 of Serine/threonine-protein phosphatase P	6	2	2	2	1	1	1	1	1	2	1	1	1	1	1	2	1	1	1	1	1	2	6.1	6.1	6.1	37.512	330	330;341;286;323;327;337	0	3.2196	By MS/MS	By MS/MS	By MS/MS	By matching	By matching	By MS/MS	3	3	3	3	3	6.1
P62241	P62241	7	7	7	40S ribosomal protein S8	RPS8	40S ribosomal protein S8 OS=Homo sapiens GN=RPS8 PE=1 SV=2	1	7	7	7	4	3	5	5	6	6	4	3	5	5	6	6	4	3	5	5	6	6	30.3	30.3	30.3	24.205	208	208	0	87.755	By MS/MS	By MS/MS	By MS/MS	By MS/MS	By MS/MS	By MS/MS	17.3	15.9	17.8	22.6	23.1	25
P62244	P62244	3	3	3	40S ribosomal protein S15a	RPS15A	40S ribosomal protein S15a OS=Homo sapiens GN=RPS15A PE=1 SV=2	1	3	3	3	0	1	1	2	1	2	0	1	1	2	1	2	0	1	1	2	1	2	20	20	20	14.839	130	130	0	4.3682		By MS/MS	By MS/MS	By MS/MS	By matching	By MS/MS	0	6.9	6.9	13.1	6.2	13.8
P62263	P62263	5	5	5	40S ribosomal protein S14	RPS14	40S ribosomal protein S14 OS=Homo sapiens GN=RPS14 PE=1 SV=3	1	5	5	5	2	2	4	5	5	4	2	2	4	5	5	4	2	2	4	5	5	4	19.9	19.9	19.9	16.273	151	151	0	14.306	By MS/MS	By MS/MS	By MS/MS	By MS/MS	By MS/MS	By MS/MS	9.3	15.9	18.5	19.9	19.9	18.5
P62266	P62266	2	2	2	40S ribosomal protein S23	RPS23	40S ribosomal protein S23 OS=Homo sapiens GN=RPS23 PE=1 SV=3	1	2	2	2	1	1	1	1	1	1	1	1	1	1	1	1	1	1	1	1	1	1	13.3	13.3	13.3	15.807	143	143	0	2.46	By MS/MS	By MS/MS	By MS/MS	By MS/MS	By MS/MS	By MS/MS	5.6	5.6	5.6	7.7	7.7	5.6
P62269	P62269	4	4	4	40S ribosomal protein S18	RPS18	40S ribosomal protein S18 OS=Homo sapiens GN=RPS18 PE=1 SV=3	1	4	4	4	1	1	1	4	3	2	1	1	1	4	3	2	1	1	1	4	3	2	27	27	27	17.718	152	152	0	17.325	By MS/MS	By matching	By MS/MS	By MS/MS	By MS/MS	By matching	7.2	5.9	7.2	27	21.1	13.2
P62277	P62277	2	2	2	40S ribosomal protein S13	RPS13	40S ribosomal protein S13 OS=Homo sapiens GN=RPS13 PE=1 SV=2	1	2	2	2	1	2	2	2	2	1	1	2	2	2	2	1	1	2	2	2	2	1	13.9	13.9	13.9	17.222	151	151	0	32.963	By MS/MS	By matching	By MS/MS	By MS/MS	By MS/MS	By MS/MS	7.9	13.9	13.9	13.9	13.9	7.9
P62280	P62280	2	2	2	40S ribosomal protein S11	RPS11	40S ribosomal protein S11 OS=Homo sapiens GN=RPS11 PE=1 SV=3	1	2	2	2	1	2	2	2	2	2	1	2	2	2	2	2	1	2	2	2	2	2	13.3	13.3	13.3	18.431	158	158	0	12.17	By matching	By MS/MS	By MS/MS	By MS/MS	By MS/MS	By MS/MS	7	13.3	13.3	13.3	13.3	13.3
P62306	P62306	1	1	1	Small nuclear ribonucleoprotein F	SNRPF	Small nuclear ribonucleoprotein F OS=Homo sapiens GN=SNRPF PE=1 SV=1	1	1	1	1	0	1	1	1	1	1	0	1	1	1	1	1	0	1	1	1	1	1	15.1	15.1	15.1	9.7251	86	86	0	17.364		By matching	By matching	By MS/MS	By MS/MS	By MS/MS	0	15.1	15.1	15.1	15.1	15.1
P62316;P62316-2	P62316;P62316-2	3;2	3;2	3;2	Small nuclear ribonucleoprotein Sm D2	SNRPD2	Small nuclear ribonucleoprotein Sm D2 OS=Homo sapiens GN=SNRPD2 PE=1 SV=1;Isoform 2 of Small nuclear ribonucleoprotein Sm D2 OS=Homo sapiens GN=SNRPD2	2	3	3	3	0	2	1	2	2	1	0	2	1	2	2	1	0	2	1	2	2	1	20.3	20.3	20.3	13.527	118	118;108	0	8.0035		By MS/MS	By MS/MS	By MS/MS	By MS/MS	By MS/MS	0	11.9	5.9	14.4	14.4	5.9
P62380	P62380	1	1	1	TATA box-binding protein-like protein 1	TBPL1	TATA box-binding protein-like protein 1 OS=Homo sapiens GN=TBPL1 PE=1 SV=1	1	1	1	1	0	0	0	1	1	0	0	0	0	1	1	0	0	0	0	1	1	0	7	7	7	20.886	186	186	0	2.3478				By MS/MS	By MS/MS		0	0	0	7	7	0
P62424	P62424	11	11	11	60S ribosomal protein L7a	RPL7A	60S ribosomal protein L7a OS=Homo sapiens GN=RPL7A PE=1 SV=2	1	11	11	11	6	7	7	10	10	8	6	7	7	10	10	8	6	7	7	10	10	8	31.2	31.2	31.2	29.995	266	266	0	291.97	By MS/MS	By MS/MS	By MS/MS	By MS/MS	By MS/MS	By MS/MS	21.8	26.7	26.7	30.8	30.8	27.1
P62701	P62701	5	5	2	40S ribosomal protein S4, X isoform	RPS4X	40S ribosomal protein S4, X isoform OS=Homo sapiens GN=RPS4X PE=1 SV=2	1	5	5	2	2	2	4	4	5	1	2	2	4	4	5	1	0	0	1	1	2	0	17.5	17.5	9.9	29.597	263	263	0	8.5256	By matching	By MS/MS	By MS/MS	By MS/MS	By MS/MS	By MS/MS	7.2	7.2	11	11	17.5	3.4
P62750	P62750	9	9	9	60S ribosomal protein L23a	RPL23A	60S ribosomal protein L23a OS=Homo sapiens GN=RPL23A PE=1 SV=1	1	9	9	9	6	7	8	7	8	9	6	7	8	7	8	9	6	7	8	7	8	9	35.9	35.9	35.9	17.695	156	156	0	34.184	By MS/MS	By MS/MS	By MS/MS	By MS/MS	By MS/MS	By MS/MS	27.6	34.6	35.3	35.3	35.3	35.9
P62753	P62753	9	9	9	40S ribosomal protein S6	RPS6	40S ribosomal protein S6 OS=Homo sapiens GN=RPS6 PE=1 SV=1	1	9	9	9	3	4	5	9	7	5	3	4	5	9	7	5	3	4	5	9	7	5	24.5	24.5	24.5	28.68	249	249	0	36.345	By MS/MS	By MS/MS	By MS/MS	By MS/MS	By MS/MS	By MS/MS	12	16.9	18.1	24.5	24.1	18.1
P62805	P62805	5	5	5	Histone H4	HIST1H4A	Histone H4 OS=Homo sapiens GN=HIST1H4A PE=1 SV=2	1	5	5	5	3	2	3	4	4	4	3	2	3	4	4	4	3	2	3	4	4	4	39.8	39.8	39.8	11.367	103	103	0	50.558	By MS/MS	By MS/MS	By MS/MS	By MS/MS	By MS/MS	By MS/MS	31.1	21.4	31.1	32	32	38.8
P62820-3;P62820-2;P62820	P62820-3;P62820-2;P62820	2;2;2	2;2;2	2;2;2	Ras-related protein Rab-1A	RAB1A	Isoform 3 of Ras-related protein Rab-1A OS=Homo sapiens GN=RAB1A;Isoform 2 of Ras-related protein Rab-1A OS=Homo sapiens GN=RAB1A;Ras-related protein Rab-1A OS=Homo sapiens GN=RAB1A PE=1 SV=3	3	2	2	2	0	0	0	2	2	2	0	0	0	2	2	2	0	0	0	2	2	2	12.4	12.4	12.4	13.903	129	129;141;205	0	4.2009				By MS/MS	By MS/MS	By matching	0	0	0	12.4	12.4	12.4
P62826	P62826	5	5	5	GTP-binding nuclear protein Ran	RAN	GTP-binding nuclear protein Ran OS=Homo sapiens GN=RAN PE=1 SV=3	1	5	5	5	3	1	1	4	3	4	3	1	1	4	3	4	3	1	1	4	3	4	25.9	25.9	25.9	24.423	216	216	0	15.965	By MS/MS	By MS/MS	By MS/MS	By MS/MS	By MS/MS	By MS/MS	14.8	5.1	5.1	19.9	14.8	21.3
P62829	P62829	2	2	2	60S ribosomal protein L23	RPL23	60S ribosomal protein L23 OS=Homo sapiens GN=RPL23 PE=1 SV=1	1	2	2	2	1	0	2	2	2	2	1	0	2	2	2	2	1	0	2	2	2	2	12.9	12.9	12.9	14.865	140	140	0	2.4863	By matching		By MS/MS	By MS/MS	By MS/MS	By MS/MS	7.1	0	12.9	12.9	12.9	12.9
P62841	P62841	2	2	2	40S ribosomal protein S15	RPS15	40S ribosomal protein S15 OS=Homo sapiens GN=RPS15 PE=1 SV=2	1	2	2	2	0	0	1	2	2	0	0	0	1	2	2	0	0	0	1	2	2	0	9	9	9	17.04	145	145	0.0014493	2.1351			By MS/MS	By MS/MS	By MS/MS		0	0	8.3	9	9	0
P62847-2;P62847-3;P62847;P62847-4	P62847-2;P62847-3;P62847;P62847-4	2;2;2;2	2;2;2;2	2;2;2;2	40S ribosomal protein S24	RPS24	Isoform 2 of 40S ribosomal protein S24 OS=Homo sapiens GN=RPS24;Isoform 3 of 40S ribosomal protein S24 OS=Homo sapiens GN=RPS24;40S ribosomal protein S24 OS=Homo sapiens GN=RPS24 PE=1 SV=1;Isoform 4 of 40S ribosomal protein S24 OS=Homo sapiens GN=RPS24	4	2	2	2	1	2	2	2	2	1	1	2	2	2	2	1	1	2	2	2	2	1	6.2	6.2	6.2	15.069	130	130;132;133;289	0	2.5137	By MS/MS	By MS/MS	By MS/MS	By MS/MS	By MS/MS	By MS/MS	6.2	6.2	6.2	6.2	6.2	6.2
P62851	P62851	5	5	5	40S ribosomal protein S25	RPS25	40S ribosomal protein S25 OS=Homo sapiens GN=RPS25 PE=1 SV=1	1	5	5	5	5	4	3	2	3	4	5	4	3	2	3	4	5	4	3	2	3	4	40	40	40	13.742	125	125	0	17.07	By MS/MS	By MS/MS	By MS/MS	By MS/MS	By MS/MS	By MS/MS	40	33.6	26.4	19.2	26.4	33.6
Q5JNZ5;P62854	Q5JNZ5;P62854	2;2	2;2	2;2	Putative 40S ribosomal protein S26-like 1;40S ribosomal protein S26	RPS26P11;RPS26	Putative 40S ribosomal protein S26-like 1 OS=Homo sapiens GN=RPS26P11 PE=5 SV=1;40S ribosomal protein S26 OS=Homo sapiens GN=RPS26 PE=1 SV=3	2	2	2	2	2	1	1	1	1	2	2	1	1	1	1	2	2	1	1	1	1	2	19.1	19.1	19.1	13.002	115	115;115	0	3.0337	By MS/MS	By MS/MS	By MS/MS	By MS/MS	By MS/MS	By MS/MS	19.1	7.8	7.8	7.8	7.8	19.1
P62857	P62857	1	1	1	40S ribosomal protein S28	RPS28	40S ribosomal protein S28 OS=Homo sapiens GN=RPS28 PE=1 SV=1	1	1	1	1	0	0	1	1	1	0	0	0	1	1	1	0	0	0	1	1	1	0	15.9	15.9	15.9	7.8409	69	69	0.0065274	1.5451			By matching	By MS/MS	By matching		0	0	15.9	15.9	15.9	0
P62861	P62861	2	2	2	40S ribosomal protein S30	FAU	40S ribosomal protein S30 OS=Homo sapiens GN=FAU PE=1 SV=1	1	2	2	2	2	2	2	1	2	2	2	2	2	1	2	2	2	2	2	1	2	2	18.6	18.6	18.6	6.6478	59	59	0	5.444	By MS/MS	By MS/MS	By MS/MS	By MS/MS	By MS/MS	By MS/MS	18.6	18.6	18.6	18.6	18.6	18.6
P62877	P62877	1	1	1	E3 ubiquitin-protein ligase RBX1;E3 ubiquitin-protein ligase RBX1, N-terminally processed	RBX1	E3 ubiquitin-protein ligase RBX1 OS=Homo sapiens GN=RBX1 PE=1 SV=1	1	1	1	1	0	0	0	1	0	0	0	0	0	1	0	0	0	0	0	1	0	0	17.6	17.6	17.6	12.274	108	108	0	8.1007				By MS/MS			0	0	0	17.6	0	0
P62879;P62879-2;P16520-2;P62873-2;Q9HAV0;P62873;P16520	P62879;P62879-2;P16520-2;P62873-2;Q9HAV0;P62873;P16520	2;1;1;1;1;1;1	2;1;1;1;1;1;1	2;1;1;1;1;1;1	Guanine nucleotide-binding protein G(I)/G(S)/G(T) subunit beta-2;Guanine nucleotide-binding protein G(I)/G(S)/G(T) subunit beta-3;Guanine nucleotide-binding protein G(I)/G(S)/G(T) subunit beta-1;Guanine nucleotide-binding protein subunit beta-4	GNB2;GNB3;GNB1;GNB4	Guanine nucleotide-binding protein G(I)/G(S)/G(T) subunit beta-2 OS=Homo sapiens GN=GNB2 PE=1 SV=3;Isoform 2 of Guanine nucleotide-binding protein G(I)/G(S)/G(T) subunit beta-2 OS=Homo sapiens GN=GNB2;Isoform 2 of Guanine nucleotide-binding protein G(I)/G(	7	2	2	2	1	1	1	2	2	1	1	1	1	2	2	1	1	1	1	2	2	1	6.5	6.5	6.5	37.331	340	340;240;297;332;340;340;340	0	4.3265	By matching	By MS/MS	By MS/MS	By MS/MS	By MS/MS	By matching	2.9	2.9	2.9	6.5	6.5	2.9
P62899;P62899-3;P62899-2	P62899;P62899-3;P62899-2	2;1;1	2;1;1	2;1;1	60S ribosomal protein L31	RPL31	60S ribosomal protein L31 OS=Homo sapiens GN=RPL31 PE=1 SV=1;Isoform 3 of 60S ribosomal protein L31 OS=Homo sapiens GN=RPL31;Isoform 2 of 60S ribosomal protein L31 OS=Homo sapiens GN=RPL31	3	2	2	2	1	2	2	2	2	2	1	2	2	2	2	2	1	2	2	2	2	2	15.2	15.2	15.2	14.463	125	125;121;128	0	16.662	By MS/MS	By MS/MS	By MS/MS	By MS/MS	By MS/MS	By MS/MS	7.2	15.2	15.2	15.2	15.2	15.2
P62910	P62910	3	3	3	60S ribosomal protein L32	RPL32	60S ribosomal protein L32 OS=Homo sapiens GN=RPL32 PE=1 SV=2	1	3	3	3	2	2	2	2	1	3	2	2	2	2	1	3	2	2	2	2	1	3	25.2	25.2	25.2	15.86	135	135	0	60.869	By MS/MS	By MS/MS	By MS/MS	By MS/MS	By MS/MS	By MS/MS	14.8	14.8	14.8	14.8	9.6	25.2
P62913	P62913	5	5	1	60S ribosomal protein L11	RPL11	60S ribosomal protein L11 OS=Homo sapiens GN=RPL11 PE=1 SV=2	1	5	5	1	0	2	2	5	5	2	0	2	2	5	5	2	0	1	1	1	1	1	25.3	25.3	6.7	20.252	178	178	0	15.854		By MS/MS	By MS/MS	By MS/MS	By MS/MS	By MS/MS	0	10.7	11.8	25.3	25.3	11.8
P62913-2	P62913-2	5	1	1	60S ribosomal protein L11	RPL11	Isoform 2 of 60S ribosomal protein L11 OS=Homo sapiens GN=RPL11	1	5	1	1	0	1	1	5	5	1	0	0	0	1	1	0	0	0	0	1	1	0	24.9	6.2	6.2	20.124	177	177	0.0059133	1.583		By matching	By matching	By MS/MS	By MS/MS	By matching	0	4	5.1	24.9	24.9	5.1
P62917	P62917	4	4	4	60S ribosomal protein L8	RPL8	60S ribosomal protein L8 OS=Homo sapiens GN=RPL8 PE=1 SV=2	1	4	4	4	2	2	4	3	3	3	2	2	4	3	3	3	2	2	4	3	3	3	16	16	16	28.024	257	257	0	54.529	By MS/MS	By MS/MS	By MS/MS	By MS/MS	By MS/MS	By MS/MS	10.5	10.5	16	13.2	13.2	13.2
P62979;P0CG47;P0CG48	P62979	5;2;2	5;2;2	3;0;0	Ubiquitin-40S ribosomal protein S27a;Ubiquitin;40S ribosomal protein S27a	RPS27A	Ubiquitin-40S ribosomal protein S27a OS=Homo sapiens GN=RPS27A PE=1 SV=2	3	5	5	3	5	4	4	4	4	5	5	4	4	4	4	5	3	3	3	3	3	3	34.6	34.6	16	17.965	156	156;229;685	0	43.138	By MS/MS	By MS/MS	By MS/MS	By MS/MS	By MS/MS	By MS/MS	34.6	26.3	24.4	24.4	24.4	34.6
P62987	P62987	4	2	2	Ubiquitin-60S ribosomal protein L40;Ubiquitin;60S ribosomal protein L40	UBA52	Ubiquitin-60S ribosomal protein L40 OS=Homo sapiens GN=UBA52 PE=1 SV=2	1	4	2	2	4	2	3	2	1	4	2	1	2	1	0	2	2	1	2	1	0	2	38.3	15.6	15.6	14.728	128	128	0	4.9071	By MS/MS	By MS/MS	By matching	By matching	By matching	By MS/MS	38.3	20.3	25.8	18	10.2	38.3
P62995;P62995-3;P62995-2	P62995;P62995-3	7;5;1	7;5;1	5;3;1	Transformer-2 protein homolog beta	TRA2B	Transformer-2 protein homolog beta OS=Homo sapiens GN=TRA2B PE=1 SV=1;Isoform 3 of Transformer-2 protein homolog beta OS=Homo sapiens GN=TRA2B	3	7	7	5	7	7	7	4	5	7	7	7	7	4	5	7	5	5	5	2	3	5	22.2	22.2	16.3	33.665	288	288;188;38	0	27.905	By MS/MS	By MS/MS	By MS/MS	By MS/MS	By MS/MS	By MS/MS	22.2	22.2	22.2	10.8	13.2	22.2
P63092-3;P63092-2;P63092;P63092-4;Q5JWF2-2;Q5JWF2	P63092-3;P63092-2;P63092;P63092-4;Q5JWF2-2;Q5JWF2	2;2;2;2;2;2	2;2;2;2;2;2	2;2;2;2;2;2	Guanine nucleotide-binding protein G(s) subunit alpha isoforms short;Guanine nucleotide-binding protein G(s) subunit alpha isoforms XLas	GNAS	Isoform 3 of Guanine nucleotide-binding protein G(s) subunit alpha isoforms short OS=Homo sapiens GN=GNAS;Isoform Gnas-2 of Guanine nucleotide-binding protein G(s) subunit alpha isoforms short OS=Homo sapiens GN=GNAS;Guanine nucleotide-binding protein G(s)	6	2	2	2	0	0	0	2	2	0	0	0	0	2	2	0	0	0	0	2	2	0	5	5	5	44.179	379	379;380;394;395;1023;1037	0	2.4619				By MS/MS	By MS/MS		0	0	0	5	5	0
P63104	P63104	2	2	2	14-3-3 protein zeta/delta	YWHAZ	14-3-3 protein zeta/delta OS=Homo sapiens GN=YWHAZ PE=1 SV=1	1	2	2	2	1	1	2	2	2	1	1	1	2	2	2	1	1	1	2	2	2	1	9.4	9.4	9.4	27.745	245	245	0	4.6044	By matching	By matching	By matching	By MS/MS	By MS/MS	By matching	3.7	3.7	9.4	9.4	9.4	3.7
P63165	P63165	1	1	1	Small ubiquitin-related modifier 1	SUMO1	Small ubiquitin-related modifier 1 OS=Homo sapiens GN=SUMO1 PE=1 SV=1	1	1	1	1	1	1	1	1	1	1	1	1	1	1	1	1	1	1	1	1	1	1	15.8	15.8	15.8	11.557	101	101	0	5.2678	By MS/MS	By matching	By MS/MS	By MS/MS	By MS/MS	By matching	15.8	15.8	15.8	15.8	15.8	15.8
P63172	P63172	1	1	1	Dynein light chain Tctex-type 1	DYNLT1	Dynein light chain Tctex-type 1 OS=Homo sapiens GN=DYNLT1 PE=1 SV=1	1	1	1	1	0	0	0	1	0	0	0	0	0	1	0	0	0	0	0	1	0	0	14.2	14.2	14.2	12.452	113	113	0	5.801				By MS/MS			0	0	0	14.2	0	0
P63173	P63173	1	1	1	60S ribosomal protein L38	RPL38	60S ribosomal protein L38 OS=Homo sapiens GN=RPL38 PE=1 SV=2	1	1	1	1	1	1	1	1	1	1	1	1	1	1	1	1	1	1	1	1	1	1	14.3	14.3	14.3	8.2178	70	70	0.00072727	2.1505	By MS/MS	By MS/MS	By MS/MS	By MS/MS	By MS/MS	By MS/MS	14.3	14.3	14.3	14.3	14.3	14.3
Q9GZV4;Q6IS14;P63241;P63241-2	Q9GZV4;Q6IS14;P63241;P63241-2	2;2;2;2	2;2;2;2	2;2;2;2	Eukaryotic translation initiation factor 5A-2;Eukaryotic translation initiation factor 5A-1-like;Eukaryotic translation initiation factor 5A-1	EIF5A2;EIF5AL1;EIF5A	Eukaryotic translation initiation factor 5A-2 OS=Homo sapiens GN=EIF5A2 PE=1 SV=3;Eukaryotic translation initiation factor 5A-1-like OS=Homo sapiens GN=EIF5AL1 PE=2 SV=2;Eukaryotic translation initiation factor 5A-1 OS=Homo sapiens GN=EIF5A PE=1 SV=2;Isofo	4	2	2	2	1	0	0	0	0	2	1	0	0	0	0	2	1	0	0	0	0	2	16.3	16.3	16.3	16.793	153	153;154;154;184	0	3.123	By MS/MS					By MS/MS	4.6	0	0	0	0	16.3
P63244	P63244	4	4	4	Guanine nucleotide-binding protein subunit beta-2-like 1;Guanine nucleotide-binding protein subunit beta-2-like 1, N-terminally processed	GNB2L1	Receptor of activated protein C kinase 1 OS=Homo sapiens GN=RACK1 PE=1 SV=3	1	4	4	4	0	1	1	3	2	2	0	1	1	3	2	2	0	1	1	3	2	2	11.4	11.4	11.4	35.076	317	317	0	5.5017		By MS/MS	By MS/MS	By MS/MS	By MS/MS	By MS/MS	0	3.2	3.2	7.9	5.7	6.6
P67809	P67809	8	8	8	Nuclease-sensitive element-binding protein 1	YBX1	Nuclease-sensitive element-binding protein 1 OS=Homo sapiens GN=YBX1 PE=1 SV=3	1	8	8	8	1	3	4	7	7	3	1	3	4	7	7	3	1	3	4	7	7	3	33.6	33.6	33.6	35.924	324	324	0	94.93	By matching	By MS/MS	By MS/MS	By MS/MS	By MS/MS	By MS/MS	5.9	16.4	21.9	28.4	33.6	16.4
P67870	P67870	1	1	1	Casein kinase II subunit beta	CSNK2B	Casein kinase II subunit beta OS=Homo sapiens GN=CSNK2B PE=1 SV=1	1	1	1	1	1	1	1	0	0	1	1	1	1	0	0	1	1	1	1	0	0	1	3.7	3.7	3.7	24.942	215	215	0.004065	1.7434	By MS/MS	By MS/MS	By MS/MS			By MS/MS	3.7	3.7	3.7	0	0	3.7
P68036-2;P68036;P68036-3	P68036-2;P68036;P68036-3	1;1;1	1;1;1	1;1;1	Ubiquitin-conjugating enzyme E2 L3	UBE2L3	Isoform 2 of Ubiquitin-conjugating enzyme E2 L3 OS=Homo sapiens GN=UBE2L3;Ubiquitin-conjugating enzyme E2 L3 OS=Homo sapiens GN=UBE2L3 PE=1 SV=1;Isoform 3 of Ubiquitin-conjugating enzyme E2 L3 OS=Homo sapiens GN=UBE2L3	3	1	1	1	1	1	1	0	0	0	1	1	1	0	0	0	1	1	1	0	0	0	7.4	7.4	7.4	14.121	122	122;154;212	0.0065359	1.5464	By MS/MS	By MS/MS	By MS/MS				7.4	7.4	7.4	0	0	0
Q5VTE0;P68104;Q05639;P68104-2	Q5VTE0;P68104;Q05639;P68104-2	6;6;5;4	6;6;5;4	6;6;5;4	Putative elongation factor 1-alpha-like 3;Elongation factor 1-alpha 1;Elongation factor 1-alpha 2	EEF1A1P5;EEF1A1;EEF1A2	Putative elongation factor 1-alpha-like 3 OS=Homo sapiens GN=EEF1A1P5 PE=5 SV=1;Elongation factor 1-alpha 1 OS=Homo sapiens GN=EEF1A1 PE=1 SV=1;Elongation factor 1-alpha 2 OS=Homo sapiens GN=EEF1A2 PE=1 SV=1;Isoform 2 of Elongation factor 1-alpha 1 OS=Homo	4	6	6	6	3	2	3	6	6	2	3	2	3	6	6	2	3	2	3	6	6	2	12.3	12.3	12.3	50.184	462	462;462;463;441	0	10.138	By MS/MS	By MS/MS	By MS/MS	By MS/MS	By MS/MS	By MS/MS	6.1	4.1	5.8	12.3	12.3	4.1
P68363-2;Q71U36-2;Q71U36;P68363;Q13748-2;Q9BQE3;Q13748;Q9NY65-2;P68366-2;P68366;Q9NY65;Q6PEY2;A6NHL2-2;A6NHL2	P68363-2;Q71U36-2;Q71U36;P68363;Q13748-2;Q9BQE3;Q13748;Q9NY65-2;P68366-2;P68366;Q9NY65;Q6PEY2	4;4;4;4;3;3;3;2;2;2;2;2;1;1	4;4;4;4;3;3;3;2;2;2;2;2;1;1	4;4;4;4;3;3;3;2;2;2;2;2;1;1	Tubulin alpha-1B chain;Tubulin alpha-1A chain;Tubulin alpha-3C/D chain;Tubulin alpha-1C chain;Tubulin alpha-8 chain;Tubulin alpha-4A chain;Tubulin alpha-3E chain	TUBA1B;TUBA1A;TUBA3C;TUBA1C;TUBA8;TUBA4A;TUBA3E	Isoform 2 of Tubulin alpha-1B chain OS=Homo sapiens GN=TUBA1B;Isoform 2 of Tubulin alpha-1A chain OS=Homo sapiens GN=TUBA1A;Tubulin alpha-1A chain OS=Homo sapiens GN=TUBA1A PE=1 SV=1;Tubulin alpha-1B chain OS=Homo sapiens GN=TUBA1B PE=1 SV=1;Isoform 2 of T	14	4	4	4	1	2	2	4	4	2	1	2	2	4	4	2	1	2	2	4	4	2	17.3	17.3	17.3	37.217	335	335;416;451;451;418;449;450;383;433;448;449;450;406;446	0	30.506	By MS/MS	By MS/MS	By MS/MS	By MS/MS	By MS/MS	By MS/MS	3	8.4	8.4	17.3	17.3	8.4
P68371	P68371	5	5	1	Tubulin beta-4B chain	TUBB4B	Tubulin beta-4B chain OS=Homo sapiens GN=TUBB4B PE=1 SV=1	1	5	5	1	3	2	2	5	5	2	3	2	2	5	5	2	0	0	0	1	1	0	12.1	12.1	2.7	49.83	445	445	0	130.56	By MS/MS	By matching	By MS/MS	By MS/MS	By MS/MS	By MS/MS	6.7	4	4.7	12.1	12.1	4.7
Q71DI3;Q16695;P84243;P68431;Q6NXT2	Q71DI3;Q16695;P84243;P68431;Q6NXT2	4;4;4;4;2	4;4;4;4;2	4;4;4;4;2	Histone H3.2;Histone H3.1t;Histone H3.3;Histone H3.1;Histone H3.3C	HIST2H3A;HIST3H3;H3F3A;HIST1H3A;H3F3C	Histone H3.2 OS=Homo sapiens GN=HIST2H3A PE=1 SV=3;Histone H3.1t OS=Homo sapiens GN=HIST3H3 PE=1 SV=3;Histone H3.3 OS=Homo sapiens GN=H3F3A PE=1 SV=2;Histone H3.1 OS=Homo sapiens GN=HIST1H3A PE=1 SV=2;Histone H3.3C OS=Homo sapiens GN=H3F3C PE=1 SV=3	5	4	4	4	3	2	2	3	4	2	3	2	2	3	4	2	3	2	2	3	4	2	18.4	18.4	18.4	15.388	136	136;136;136;136;135	0	10.683	By MS/MS	By MS/MS	By MS/MS	By MS/MS	By MS/MS	By MS/MS	13.2	13.2	13.2	18.4	18.4	13.2
P78316-2;P78316	P78316-2;P78316	2;2	2;2	2;2	Nucleolar protein 14	NOP14	Isoform 2 of Nucleolar protein 14 OS=Homo sapiens GN=NOP14;Nucleolar protein 14 OS=Homo sapiens GN=NOP14 PE=1 SV=3	2	2	2	2	1	2	1	1	1	1	1	2	1	1	1	1	1	2	1	1	1	1	2.7	2.7	2.7	91.384	806	806;857	0	6.9631	By MS/MS	By matching	By MS/MS	By MS/MS	By MS/MS	By matching	1.1	2.7	1.1	1.6	1.6	1.1
P78344-2;P78344	P78344-2;P78344	4;4	4;4	4;4	Eukaryotic translation initiation factor 4 gamma 2	EIF4G2	Isoform 2 of Eukaryotic translation initiation factor 4 gamma 2 OS=Homo sapiens GN=EIF4G2;Eukaryotic translation initiation factor 4 gamma 2 OS=Homo sapiens GN=EIF4G2 PE=1 SV=1	2	4	4	4	0	0	0	3	4	0	0	0	0	3	4	0	0	0	0	3	4	0	6	6	6	98.149	869	869;907	0	26.761				By MS/MS	By MS/MS		0	0	0	4.6	6	0
P78345	P78345	1	1	1	Ribonuclease P protein subunit p38	RPP38	Ribonuclease P protein subunit p38 OS=Homo sapiens GN=RPP38 PE=1 SV=2	1	1	1	1	0	0	0	1	0	0	0	0	0	1	0	0	0	0	0	1	0	0	3.5	3.5	3.5	31.834	283	283	0.0083655	1.4412				By MS/MS			0	0	0	3.5	0	0
P78358-2;P78358	P78358-2;P78358	3;3	3;3	3;3	Cancer/testis antigen 1	CTAG1A	Isoform 2 of Cancer/testis antigen 1 OS=Homo sapiens GN=CTAG1A;Cancer/testis antigen 1 OS=Homo sapiens GN=CTAG1A PE=1 SV=1	2	3	3	3	1	1	1	2	3	1	1	1	1	2	3	1	1	1	1	2	3	1	32.7	32.7	32.7	16.192	168	168;180	0	18.693	By MS/MS	By MS/MS	By MS/MS	By MS/MS	By MS/MS	By MS/MS	23.8	23.8	23.8	32.7	32.7	23.8
P78527;P78527-2	P78527;P78527-2	50;48	50;48	50;48	DNA-dependent protein kinase catalytic subunit	PRKDC	DNA-dependent protein kinase catalytic subunit OS=Homo sapiens GN=PRKDC PE=1 SV=3;Isoform 2 of DNA-dependent protein kinase catalytic subunit OS=Homo sapiens GN=PRKDC	2	50	50	50	6	8	5	45	46	16	6	8	5	45	46	16	6	8	5	45	46	16	13.5	13.5	13.5	469.08	4128	4128;4097	0	280.42	By MS/MS	By MS/MS	By MS/MS	By MS/MS	By MS/MS	By MS/MS	1.7	2.3	1.5	12.2	12.4	4.5
P78559;P78559-2	P78559;P78559-2	1;1	1;1	1;1	Microtubule-associated protein 1A;MAP1A heavy chain;MAP1 light chain LC2	MAP1A	Microtubule-associated protein 1A OS=Homo sapiens GN=MAP1A PE=1 SV=6;Isoform 2 of Microtubule-associated protein 1A OS=Homo sapiens GN=MAP1A	2	1	1	1	0	1	1	0	0	1	0	1	1	0	0	1	0	1	1	0	0	1	0.4	0.4	0.4	305.48	2803	2803;2805	0.00072674	2.1495		By MS/MS	By MS/MS			By MS/MS	0	0.4	0.4	0	0	0.4
P80723;P80723-2	P80723;P80723-2	12;10	12;10	12;10	Brain acid soluble protein 1	BASP1	Brain acid soluble protein 1 OS=Homo sapiens GN=BASP1 PE=1 SV=2;Isoform 2 of Brain acid soluble protein 1 OS=Homo sapiens GN=BASP1	2	12	12	12	0	0	1	11	12	0	0	0	1	11	12	0	0	0	1	11	12	0	76.7	76.7	76.7	22.693	227	227;173	0	78.553			By matching	By MS/MS	By MS/MS		0	0	7	76.7	76.7	0
P82970	P82970	1	1	1	High mobility group nucleosome-binding domain-containing protein 5	HMGN5	High mobility group nucleosome-binding domain-containing protein 5 OS=Homo sapiens GN=HMGN5 PE=1 SV=1	1	1	1	1	0	1	0	0	0	1	0	1	0	0	0	1	0	1	0	0	0	1	3.2	3.2	3.2	31.524	282	282	0.0027435	1.8112		By MS/MS				By MS/MS	0	3.2	0	0	0	3.2
P83731	P83731	7	7	7	60S ribosomal protein L24	RPL24	60S ribosomal protein L24 OS=Homo sapiens GN=RPL24 PE=1 SV=1	1	7	7	7	3	2	6	6	6	5	3	2	6	6	6	5	3	2	6	6	6	5	37.6	37.6	37.6	17.779	157	157	0	26.762	By MS/MS	By MS/MS	By MS/MS	By MS/MS	By MS/MS	By MS/MS	18.5	13.4	30.6	29.3	29.3	30.6
P83881	P83881	3	3	2	60S ribosomal protein L36a	RPL36A	60S ribosomal protein L36a OS=Homo sapiens GN=RPL36A PE=1 SV=2	1	3	3	2	3	3	3	2	3	3	3	3	3	2	3	3	2	2	2	1	2	2	17.9	17.9	9.4	12.441	106	106	0	7.3333	By MS/MS	By MS/MS	By MS/MS	By MS/MS	By MS/MS	By MS/MS	17.9	17.9	17.9	17.9	17.9	17.9
P83916	P83916	2	2	2	Chromobox protein homolog 1	CBX1	Chromobox protein homolog 1 OS=Homo sapiens GN=CBX1 PE=1 SV=1	1	2	2	2	2	2	2	0	0	2	2	2	2	0	0	2	2	2	2	0	0	2	8.6	8.6	8.6	21.418	185	185	0	14.732	By MS/MS	By MS/MS	By MS/MS			By MS/MS	8.6	8.6	8.6	0	0	8.6
P84085	P84085	1	1	1	ADP-ribosylation factor 5	ARF5	ADP-ribosylation factor 5 OS=Homo sapiens GN=ARF5 PE=1 SV=2	1	1	1	1	0	0	0	1	1	0	0	0	0	1	1	0	0	0	0	1	1	0	5.6	5.6	5.6	20.529	180	180	0	2.638				By MS/MS	By MS/MS		0	0	0	5.6	5.6	0
P84095	P84095	4	4	3	Rho-related GTP-binding protein RhoG	RHOG	Rho-related GTP-binding protein RhoG OS=Homo sapiens GN=RHOG PE=1 SV=1	1	4	4	3	0	2	1	4	4	1	0	2	1	4	4	1	0	1	1	3	3	0	22.5	22.5	16.8	21.308	191	191	0	23.545		By MS/MS	By MS/MS	By MS/MS	By MS/MS	By MS/MS	0	14.7	8.9	22.5	22.5	5.8
P84098	P84098	3	3	3	60S ribosomal protein L19	RPL19	60S ribosomal protein L19 OS=Homo sapiens GN=RPL19 PE=1 SV=1	1	3	3	3	2	2	3	2	3	3	2	2	3	2	3	3	2	2	3	2	3	3	18.4	18.4	18.4	23.466	196	196	0	40.662	By matching	By MS/MS	By MS/MS	By MS/MS	By MS/MS	By MS/MS	13.3	13.3	18.4	13.8	18.4	18.4
P84101-4;P84101;P84101-3;P84101-2	P84101-4;P84101;P84101-3;P84101-2	4;4;2;2	4;4;2;2	4;4;2;2	Small EDRK-rich factor 2	SERF2	Isoform 4 of Small EDRK-rich factor 2 OS=Homo sapiens GN=SERF2;Small EDRK-rich factor 2 OS=Homo sapiens GN=SERF2 PE=1 SV=1;Isoform 3 of Small EDRK-rich factor 2 OS=Homo sapiens GN=SERF2;Isoform 2 of Small EDRK-rich factor 2 OS=Homo sapiens GN=SERF2	4	4	4	4	4	3	3	2	1	4	4	3	3	2	1	4	4	3	3	2	1	4	44.4	44.4	44.4	5.2159	45	45;59;133;170	0	28.124	By MS/MS	By MS/MS	By MS/MS	By matching	By matching	By MS/MS	44.4	40	40	22.2	20	44.4
P84103-2;P84103	P84103-2;P84103	8;8	8;8	8;8	Serine/arginine-rich splicing factor 3	SRSF3	Isoform 2 of Serine/arginine-rich splicing factor 3 OS=Homo sapiens GN=SRSF3;Serine/arginine-rich splicing factor 3 OS=Homo sapiens GN=SRSF3 PE=1 SV=1	2	8	8	8	6	7	5	1	1	6	6	7	5	1	1	6	6	7	5	1	1	6	46	46	46	14.203	124	124;164	0	40.347	By MS/MS	By MS/MS	By MS/MS	By MS/MS	By MS/MS	By MS/MS	44.4	45.2	33.9	6.5	6.5	45.2
P86791;P86790	P86791;P86790	1;1	1;1	1;1	Vacuolar fusion protein CCZ1 homolog;Vacuolar fusion protein CCZ1 homolog B	CCZ1;CCZ1B	Vacuolar fusion protein CCZ1 homolog OS=Homo sapiens GN=CCZ1 PE=1 SV=1;Vacuolar fusion protein CCZ1 homolog B OS=Homo sapiens GN=CCZ1B PE=1 SV=1	2	1	1	1	0	0	0	1	1	0	0	0	0	1	1	0	0	0	0	1	1	0	3.5	3.5	3.5	55.866	482	482;482	0	20.354				By MS/MS	By MS/MS		0	0	0	3.5	3.5	0
P98194-2;P98194-4;P98194;P98194-3;P98194-5;P98194-8;P98194-9;P98194-6;P98194-7	P98194-2;P98194-4;P98194;P98194-3;P98194-5;P98194-8;P98194-9;P98194-6;P98194-7	5;5;5;5;5;5;5;5;5	5;5;5;5;5;5;5;5;5	5;5;5;5;5;5;5;5;5	Calcium-transporting ATPase type 2C member 1	ATP2C1	Isoform 2 of Calcium-transporting ATPase type 2C member 1 OS=Homo sapiens GN=ATP2C1;Isoform 4 of Calcium-transporting ATPase type 2C member 1 OS=Homo sapiens GN=ATP2C1;Calcium-transporting ATPase type 2C member 1 OS=Homo sapiens GN=ATP2C1 PE=1 SV=3;Isoform	9	5	5	5	0	0	0	4	5	0	0	0	0	4	5	0	0	0	0	4	5	0	8.3	8.3	8.3	96.959	888	888;903;919;923;939;944;949;959;973	0	60.964				By MS/MS	By MS/MS		0	0	0	6.5	8.3	0
P99999	P99999	2	2	2	Cytochrome c	CYCS	Cytochrome c OS=Homo sapiens GN=CYCS PE=1 SV=2	1	2	2	2	2	2	2	1	1	2	2	2	2	1	1	2	2	2	2	1	1	2	14.3	14.3	14.3	11.749	105	105	0	21.657	By MS/MS	By MS/MS	By MS/MS	By MS/MS	By MS/MS	By MS/MS	14.3	14.3	14.3	13.3	13.3	14.3
Q00325-2;Q00325	Q00325-2;Q00325	3;3	3;3	3;3	Phosphate carrier protein, mitochondrial	SLC25A3	Isoform B of Phosphate carrier protein, mitochondrial OS=Homo sapiens GN=SLC25A3;Phosphate carrier protein, mitochondrial OS=Homo sapiens GN=SLC25A3 PE=1 SV=2	2	3	3	3	1	2	3	3	3	3	1	2	3	3	3	3	1	2	3	3	3	3	7.8	7.8	7.8	39.958	361	361;362	0	8.7665	By MS/MS	By MS/MS	By MS/MS	By MS/MS	By MS/MS	By MS/MS	3.3	5.3	7.8	7.8	7.8	7.8
Q00341-2;Q00341	Q00341-2;Q00341	3;3	3;3	3;3	Vigilin	HDLBP	Isoform 2 of Vigilin OS=Homo sapiens GN=HDLBP;Vigilin OS=Homo sapiens GN=HDLBP PE=1 SV=2	2	3	3	3	0	0	0	2	2	0	0	0	0	2	2	0	0	0	0	2	2	0	3.3	3.3	3.3	137.99	1235	1235;1268	0	7.1019				By MS/MS	By MS/MS		0	0	0	2	2.3	0
Q00534	Q00534	2	1	1	Cyclin-dependent kinase 6	CDK6	Cyclin-dependent kinase 6 OS=Homo sapiens GN=CDK6 PE=1 SV=1	1	2	1	1	1	0	1	1	1	1	0	0	0	1	1	0	0	0	0	1	1	0	8	5.5	5.5	36.938	326	326	0	21.247	By matching		By matching	By MS/MS	By MS/MS	By matching	2.5	0	2.5	5.5	5.5	2.5
Q00610-2;Q00610	Q00610-2;Q00610	2;2	2;2	2;2	Clathrin heavy chain 1	CLTC	Isoform 2 of Clathrin heavy chain 1 OS=Homo sapiens GN=CLTC;Clathrin heavy chain 1 OS=Homo sapiens GN=CLTC PE=1 SV=5	2	2	2	2	0	0	0	2	2	0	0	0	0	2	2	0	0	0	0	2	2	0	1.6	1.6	1.6	187.89	1639	1639;1675	0	6.3424				By MS/MS	By MS/MS		0	0	0	1.6	1.6	0
Q00688	Q00688	1	1	1	Peptidyl-prolyl cis-trans isomerase FKBP3	FKBP3	Peptidyl-prolyl cis-trans isomerase FKBP3 OS=Homo sapiens GN=FKBP3 PE=1 SV=1	1	1	1	1	1	1	1	0	0	1	1	1	1	0	0	1	1	1	1	0	0	1	6.2	6.2	6.2	25.177	224	224	0	6.6832	By MS/MS	By MS/MS	By matching			By MS/MS	6.2	6.2	6.2	0	0	6.2
Q00839;Q00839-2	Q00839;Q00839-2	11;8	11;8	11;8	Heterogeneous nuclear ribonucleoprotein U	HNRNPU	Heterogeneous nuclear ribonucleoprotein U OS=Homo sapiens GN=HNRNPU PE=1 SV=6;Isoform 2 of Heterogeneous nuclear ribonucleoprotein U OS=Homo sapiens GN=HNRNPU	2	11	11	11	2	5	9	9	9	10	2	5	9	9	9	10	2	5	9	9	9	10	13	13	13	90.583	825	825;806	0	50.416	By MS/MS	By MS/MS	By MS/MS	By MS/MS	By MS/MS	By MS/MS	2.4	6.2	9.7	11	11	11.5
Q01082	Q01082	2	2	2	Spectrin beta chain, non-erythrocytic 1	SPTBN1	Spectrin beta chain, non-erythrocytic 1 OS=Homo sapiens GN=SPTBN1 PE=1 SV=2	1	2	2	2	0	1	1	0	0	2	0	1	1	0	0	2	0	1	1	0	0	2	1.3	1.3	1.3	274.61	2364	2364	0	4.511		By matching	By MS/MS			By MS/MS	0	0.6	0.6	0	0	1.3
Q01085;Q01085-2	Q01085;Q01085-2	1;1	1;1	1;1	Nucleolysin TIAR	TIAL1	Nucleolysin TIAR OS=Homo sapiens GN=TIAL1 PE=1 SV=1;Isoform 2 of Nucleolysin TIAR OS=Homo sapiens GN=TIAL1	2	1	1	1	0	1	0	1	0	1	0	1	0	1	0	1	0	1	0	1	0	1	2.9	2.9	2.9	41.59	375	375;392	0	2.4701		By matching		By matching		By MS/MS	0	2.9	0	2.9	0	2.9
Q01130-2;Q01130	Q01130-2;Q01130	4;4	4;4	2;2	Serine/arginine-rich splicing factor 2	SRSF2	Isoform 2 of Serine/arginine-rich splicing factor 2 OS=Homo sapiens GN=SRSF2;Serine/arginine-rich splicing factor 2 OS=Homo sapiens GN=SRSF2 PE=1 SV=4	2	4	4	2	4	4	4	1	1	4	4	4	4	1	1	4	2	2	2	0	0	2	23	23	15.8	24.153	209	209;221	0	71.147	By MS/MS	By MS/MS	By MS/MS	By matching	By matching	By MS/MS	23	23	23	3.3	3.8	23
Q01518-2;Q01518	Q01518-2;Q01518	1;1	1;1	1;1	Adenylyl cyclase-associated protein 1	CAP1	Isoform 2 of Adenylyl cyclase-associated protein 1 OS=Homo sapiens GN=CAP1;Adenylyl cyclase-associated protein 1 OS=Homo sapiens GN=CAP1 PE=1 SV=5	2	1	1	1	0	0	0	1	1	0	0	0	0	1	1	0	0	0	0	1	1	0	3.4	3.4	3.4	51.83	474	474;475	0	27.323				By MS/MS	By MS/MS		0	0	0	3.4	3.4	0
Q01650	Q01650	3	3	3	Large neutral amino acids transporter small subunit 1	SLC7A5	Large neutral amino acids transporter small subunit 1 OS=Homo sapiens GN=SLC7A5 PE=1 SV=2	1	3	3	3	2	2	3	2	2	3	2	2	3	2	2	3	2	2	3	2	2	3	6.7	6.7	6.7	55.01	507	507	0	23.684	By matching	By matching	By MS/MS	By MS/MS	By MS/MS	By MS/MS	6.3	6.3	6.7	6.3	6.3	6.7
Q01780-2;Q01780	Q01780-2;Q01780	7;7	7;7	7;7	Exosome component 10	EXOSC10	Isoform 2 of Exosome component 10 OS=Homo sapiens GN=EXOSC10;Exosome component 10 OS=Homo sapiens GN=EXOSC10 PE=1 SV=2	2	7	7	7	2	3	2	5	4	1	2	3	2	5	4	1	2	3	2	5	4	1	7.6	7.6	7.6	98.088	860	860;885	0	8.1257	By MS/MS	By MS/MS	By MS/MS	By MS/MS	By MS/MS	By MS/MS	2.2	3.1	2.1	5.1	4.8	1.2
Q01804-5;Q01804-3;Q01804	Q01804-5;Q01804-3;Q01804	2;2;2	2;2;2	2;2;2	OTU domain-containing protein 4	OTUD4	Isoform 2 of OTU domain-containing protein 4 OS=Homo sapiens GN=OTUD4;Isoform 3 of OTU domain-containing protein 4 OS=Homo sapiens GN=OTUD4;OTU domain-containing protein 4 OS=Homo sapiens GN=OTUD4 PE=1 SV=4	3	2	2	2	0	1	1	2	1	0	0	1	1	2	1	0	0	1	1	2	1	0	2.5	2.5	2.5	116.95	1048	1048;1049;1114	0	9.2872		By MS/MS	By MS/MS	By MS/MS	By MS/MS		0	1.5	1.5	2.5	1.5	0
Q01813-2;Q01813	Q01813-2;Q01813	4;4	4;4	4;4	ATP-dependent 6-phosphofructokinase, platelet type	PFKP	Isoform 2 of ATP-dependent 6-phosphofructokinase, platelet type OS=Homo sapiens GN=PFKP;ATP-dependent 6-phosphofructokinase, platelet type OS=Homo sapiens GN=PFKP PE=1 SV=2	2	4	4	4	0	1	0	3	4	0	0	1	0	3	4	0	0	1	0	3	4	0	6.8	6.8	6.8	85.315	776	776;784	0	6.3115		By matching		By MS/MS	By MS/MS		0	1	0	4	6.8	0
Q01831;Q01831-2;Q01831-3	Q01831;Q01831-2	5;5;1	5;5;1	5;5;1	DNA repair protein complementing XP-C cells	XPC	DNA repair protein complementing XP-C cells OS=Homo sapiens GN=XPC PE=1 SV=4;Isoform 2 of DNA repair protein complementing XP-C cells OS=Homo sapiens GN=XPC	3	5	5	5	4	3	3	1	0	2	4	3	3	1	0	2	4	3	3	1	0	2	7.4	7.4	7.4	105.95	940	940;903;140	0	7.3102	By MS/MS	By MS/MS	By MS/MS	By matching		By MS/MS	6	3.9	4.7	1.5	0	3.2
Q02040;Q02040-2;Q02040-3	Q02040;Q02040-2;Q02040-3	6;3;3	6;3;3	6;3;3	A-kinase anchor protein 17A	AKAP17A	A-kinase anchor protein 17A OS=Homo sapiens GN=AKAP17A PE=1 SV=2;Isoform 2 of A-kinase anchor protein 17A OS=Homo sapiens GN=AKAP17A;Isoform 3 of A-kinase anchor protein 17A OS=Homo sapiens GN=AKAP17A	3	6	6	6	4	4	4	4	4	6	4	4	4	4	4	6	4	4	4	4	4	6	10.9	10.9	10.9	80.735	695	695;385;445	0	43.377	By MS/MS	By MS/MS	By MS/MS	By MS/MS	By MS/MS	By MS/MS	7.9	7.9	7.6	8.1	8.1	10.9
Q02241-3;Q02241-2;Q02241	Q02241-3;Q02241-2;Q02241	2;2;2	2;2;2	2;2;2	Kinesin-like protein KIF23	KIF23	Isoform 3 of Kinesin-like protein KIF23 OS=Homo sapiens GN=KIF23;Isoform 2 of Kinesin-like protein KIF23 OS=Homo sapiens GN=KIF23;Kinesin-like protein KIF23 OS=Homo sapiens GN=KIF23 PE=1 SV=3	3	2	2	2	0	0	0	2	2	0	0	0	0	2	2	0	0	0	0	2	2	0	5.1	5.1	5.1	77.698	673	673;856;960	0	34.032				By MS/MS	By MS/MS		0	0	0	5.1	5.1	0
Q02543	Q02543	3	3	3	60S ribosomal protein L18a	RPL18A	60S ribosomal protein L18a OS=Homo sapiens GN=RPL18A PE=1 SV=2	1	3	3	3	1	1	1	3	3	2	1	1	1	3	3	2	1	1	1	3	3	2	21	21	21	20.762	176	176	0	22.138	By MS/MS	By MS/MS	By MS/MS	By MS/MS	By MS/MS	By MS/MS	7.4	7.4	7.4	21	21	13.1
Q02878	Q02878	10	10	10	60S ribosomal protein L6	RPL6	60S ribosomal protein L6 OS=Homo sapiens GN=RPL6 PE=1 SV=3	1	10	10	10	7	8	8	7	8	10	7	8	8	7	8	10	7	8	8	7	8	10	31.9	31.9	31.9	32.728	288	288	0	34.079	By MS/MS	By MS/MS	By MS/MS	By MS/MS	By MS/MS	By MS/MS	24.7	28.1	28.5	24.7	27.8	31.9
Q02880-2;Q02880	Q02880-2;Q02880	10;10	7;7	7;7	DNA topoisomerase 2-beta	TOP2B	Isoform Beta-1 of DNA topoisomerase 2-beta OS=Homo sapiens GN=TOP2B;DNA topoisomerase 2-beta OS=Homo sapiens GN=TOP2B PE=1 SV=3	2	10	7	7	5	7	6	4	5	7	3	4	5	3	4	5	3	4	5	3	4	5	6.2	4.6	4.6	182.66	1621	1621;1626	0	14.897	By MS/MS	By MS/MS	By MS/MS	By MS/MS	By MS/MS	By MS/MS	2.6	3.6	3.2	2	2.5	4.4
Q02952-3;Q02952-2;Q02952	Q02952-3;Q02952-2;Q02952	1;1;1	1;1;1	1;1;1	A-kinase anchor protein 12	AKAP12	Isoform 3 of A-kinase anchor protein 12 OS=Homo sapiens GN=AKAP12;Isoform 2 of A-kinase anchor protein 12 OS=Homo sapiens GN=AKAP12;A-kinase anchor protein 12 OS=Homo sapiens GN=AKAP12 PE=1 SV=4	3	1	1	1	0	0	0	1	1	0	0	0	0	1	1	0	0	0	0	1	1	0	1	1	1	180.99	1677	1677;1684;1782	0.0014296	2.0441				By MS/MS	By matching		0	0	0	1	1	0
Q02978-2;Q02978	Q02978-2;Q02978	2;2	2;2	2;2	Mitochondrial 2-oxoglutarate/malate carrier protein	SLC25A11	Isoform 2 of Mitochondrial 2-oxoglutarate/malate carrier protein OS=Homo sapiens GN=SLC25A11;Mitochondrial 2-oxoglutarate/malate carrier protein OS=Homo sapiens GN=SLC25A11 PE=1 SV=3	2	2	2	2	1	1	1	2	2	1	1	1	1	2	2	1	1	1	1	2	2	1	12.2	12.2	12.2	28.494	263	263;314	0	9.2693	By MS/MS	By MS/MS	By MS/MS	By MS/MS	By MS/MS	By MS/MS	6.1	6.1	6.1	12.2	12.2	6.1
Q03111	Q03111	5	5	5	Protein ENL	MLLT1	Protein ENL OS=Homo sapiens GN=MLLT1 PE=1 SV=2	1	5	5	5	3	3	3	1	0	4	3	3	3	1	0	4	3	3	3	1	0	4	9.5	9.5	9.5	62.055	559	559	0	7.266	By MS/MS	By MS/MS	By MS/MS	By matching		By MS/MS	5.7	6.3	6.3	2.3	0	8.2
Q03135-2	Q03135-2	1	1	1			Isoform 2 of Caveolin-1 OS=Homo sapiens GN=CAV1	1	1	1	1	1	0	1	1	1	1	1	0	1	1	1	1	1	0	1	1	1	1	10.2	10.2	10.2	17.023	147	147	0	48.811	By matching		By matching	By MS/MS	By MS/MS	By matching	10.2	0	10.2	10.2	10.2	10.2
Q03164-2;Q03164;Q03164-3	Q03164-2;Q03164;Q03164-3	20;20;20	20;20;20	20;20;20	Histone-lysine N-methyltransferase 2A;MLL cleavage product N320;MLL cleavage product C180	KMT2A	Isoform 2 of Histone-lysine N-methyltransferase 2A OS=Homo sapiens GN=KMT2A;Histone-lysine N-methyltransferase 2A OS=Homo sapiens GN=KMT2A PE=1 SV=5;Isoform 3 of Histone-lysine N-methyltransferase 2A OS=Homo sapiens GN=KMT2A	3	20	20	20	10	10	10	8	12	16	10	10	10	8	12	16	10	10	10	8	12	16	6.9	6.9	6.9	427.73	3931	3931;3969;3972	0	136.51	By MS/MS	By MS/MS	By MS/MS	By MS/MS	By MS/MS	By MS/MS	3.9	3.6	3.5	2.6	4.2	5.4
Q03188;Q03188-2	Q03188	5;2	5;2	5;2	Centromere protein C	CENPC	Centromere protein C OS=Homo sapiens GN=CENPC PE=1 SV=2	2	5	5	5	4	5	5	0	1	3	4	5	5	0	1	3	4	5	5	0	1	3	6.2	6.2	6.2	106.83	943	943;542	0	9.6085	By MS/MS	By MS/MS	By MS/MS		By MS/MS	By MS/MS	4.8	6.2	6.2	0	1	3.6
Q03252	Q03252	5	5	5	Lamin-B2	LMNB2	Lamin-B2 OS=Homo sapiens GN=LMNB2 PE=1 SV=4	1	5	5	5	0	1	1	5	5	1	0	1	1	5	5	1	0	1	1	5	5	1	8.5	8.5	8.5	69.948	620	620	0	7.5793		By MS/MS	By MS/MS	By MS/MS	By MS/MS	By matching	0	1.9	1.9	8.5	8.5	1.9
Q03518	Q03518	1	1	1	Antigen peptide transporter 1	TAP1	Antigen peptide transporter 1 OS=Homo sapiens GN=TAP1 PE=1 SV=2	1	1	1	1	0	0	1	1	1	0	0	0	1	1	1	0	0	0	1	1	1	0	1.7	1.7	1.7	87.217	808	808	0	12.362			By MS/MS	By MS/MS	By MS/MS		0	0	1.7	1.7	1.7	0
Q03701	Q03701	5	5	5	CCAAT/enhancer-binding protein zeta	CEBPZ	CCAAT/enhancer-binding protein zeta OS=Homo sapiens GN=CEBPZ PE=1 SV=3	1	5	5	5	0	0	1	5	5	1	0	0	1	5	5	1	0	0	1	5	5	1	6	6	6	120.97	1054	1054	0	20.362			By matching	By MS/MS	By MS/MS	By matching	0	0	1.1	6	6	1.5
Q04637-6;Q04637-7;Q04637-5;Q04637-4;Q04637-3;Q04637;Q04637-8;Q04637-9;O43432-4;O43432;O43432-3	Q04637-6;Q04637-7;Q04637-5;Q04637-4;Q04637-3;Q04637;Q04637-8;Q04637-9	5;5;5;5;5;5;5;5;1;1;1	5;5;5;5;5;5;5;5;1;1;1	5;5;5;5;5;5;5;5;1;1;1	Eukaryotic translation initiation factor 4 gamma 1	EIF4G1	Isoform E of Eukaryotic translation initiation factor 4 gamma 1 OS=Homo sapiens GN=EIF4G1;Isoform 7 of Eukaryotic translation initiation factor 4 gamma 1 OS=Homo sapiens GN=EIF4G1;Isoform D of Eukaryotic translation initiation factor 4 gamma 1 OS=Homo sapi	11	5	5	5	1	0	0	5	4	0	1	0	0	5	4	0	1	0	0	5	4	0	3.5	3.5	3.5	154.8	1403	1403;1404;1435;1512;1559;1599;1600;1606;1305;1585;1591	0	11.114	By matching			By MS/MS	By MS/MS		1.1	0	0	3.5	3.4	0
Q04837	Q04837	1	1	1	Single-stranded DNA-binding protein, mitochondrial	SSBP1	Single-stranded DNA-binding protein, mitochondrial OS=Homo sapiens GN=SSBP1 PE=1 SV=1	1	1	1	1	0	0	0	1	1	0	0	0	0	1	1	0	0	0	0	1	1	0	10.1	10.1	10.1	17.259	148	148	0	7.582				By MS/MS	By MS/MS		0	0	0	10.1	10.1	0
Q04917	Q04917	2	2	2	14-3-3 protein eta	YWHAH	14-3-3 protein eta OS=Homo sapiens GN=YWHAH PE=1 SV=4	1	2	2	2	0	0	0	2	1	0	0	0	0	2	1	0	0	0	0	2	1	0	8.5	8.5	8.5	28.218	246	246	0	3.658				By MS/MS	By MS/MS		0	0	0	8.5	4.9	0
Q04941	Q04941	1	1	1	Proteolipid protein 2	PLP2	Proteolipid protein 2 OS=Homo sapiens GN=PLP2 PE=1 SV=1	1	1	1	1	1	1	1	1	1	1	1	1	1	1	1	1	1	1	1	1	1	1	8.6	8.6	8.6	16.691	152	152	0	4.2349	By matching	By MS/MS	By MS/MS	By MS/MS	By MS/MS	By matching	8.6	8.6	8.6	8.6	8.6	8.6
Q05519-2;Q05519	Q05519-2;Q05519	10;10	10;10	10;10	Serine/arginine-rich splicing factor 11	SRSF11	Isoform 2 of Serine/arginine-rich splicing factor 11 OS=Homo sapiens GN=SRSF11;Serine/arginine-rich splicing factor 11 OS=Homo sapiens GN=SRSF11 PE=1 SV=1	2	10	10	10	8	7	7	0	1	10	8	7	7	0	1	10	8	7	7	0	1	10	19.5	19.5	19.5	53.413	483	483;484	0	90.41	By MS/MS	By MS/MS	By MS/MS		By matching	By MS/MS	19.3	19	16.4	0	3.1	19.5
Q05655;Q05655-2;Q04759-3;Q04759-2;Q04759	Q05655;Q05655-2	4;2;1;1;1	4;2;1;1;1	4;2;1;1;1	Protein kinase C delta type;Protein kinase C delta type regulatory subunit;Protein kinase C delta type catalytic subunit	PRKCD	Protein kinase C delta type OS=Homo sapiens GN=PRKCD PE=1 SV=2;Isoform 2 of Protein kinase C delta type OS=Homo sapiens GN=PRKCD	5	4	4	4	1	1	0	4	4	1	1	1	0	4	4	1	1	1	0	4	4	1	4.4	4.4	4.4	77.504	676	676;707;581;643;706	0	87.462	By matching	By matching		By MS/MS	By MS/MS	By matching	1.5	1.5	0	4.4	4.4	1.5
Q05682-5;Q05682-4;Q05682-3;Q05682-6;Q05682-2;Q05682	Q05682-5;Q05682-4;Q05682-3;Q05682-6;Q05682-2;Q05682	13;13;12;12;12;12	13;13;12;12;12;12	13;13;12;12;12;12	Caldesmon	CALD1	Isoform 5 of Caldesmon OS=Homo sapiens GN=CALD1;Isoform 4 of Caldesmon OS=Homo sapiens GN=CALD1;Isoform 3 of Caldesmon OS=Homo sapiens GN=CALD1;Isoform 6 of Caldesmon OS=Homo sapiens GN=CALD1;Isoform 2 of Caldesmon OS=Homo sapiens GN=CALD1;Caldesmon OS=Hom	6	13	13	13	10	9	7	0	0	11	10	9	7	0	0	11	10	9	7	0	0	11	28.6	28.6	28.6	61.212	532	532;538;558;563;564;793	0	53.432	By MS/MS	By MS/MS	By MS/MS			By MS/MS	22.7	19.7	15.2	0	0	26.1
Q06136-2;Q06136	Q06136-2;Q06136	1;1	1;1	1;1	3-ketodihydrosphingosine reductase	KDSR	Isoform 2 of 3-ketodihydrosphingosine reductase OS=Homo sapiens GN=KDSR;3-ketodihydrosphingosine reductase OS=Homo sapiens GN=KDSR PE=1 SV=1	2	1	1	1	0	0	0	1	1	0	0	0	0	1	1	0	0	0	0	1	1	0	6	6	6	29.159	268	268;332	0	3.7959				By MS/MS	By MS/MS		0	0	0	6	6	0
Q06210-2;Q06210	Q06210-2;Q06210	2;2	2;2	2;2	Glutamine--fructose-6-phosphate aminotransferase [isomerizing] 1	GFPT1	Isoform 2 of Glutamine--fructose-6-phosphate aminotransferase [isomerizing] 1 OS=Homo sapiens GN=GFPT1;Glutamine--fructose-6-phosphate aminotransferase [isomerizing] 1 OS=Homo sapiens GN=GFPT1 PE=1 SV=3	2	2	2	2	0	0	0	2	0	0	0	0	0	2	0	0	0	0	0	2	0	0	3.5	3.5	3.5	76.758	681	681;699	0.0020718	1.8434				By MS/MS			0	0	0	3.5	0	0
Q06830;P32119;Q13162	Q06830	6;1;1	6;1;1	6;1;1	Peroxiredoxin-1	PRDX1	Peroxiredoxin-1 OS=Homo sapiens GN=PRDX1 PE=1 SV=1	3	6	6	6	4	5	4	1	3	5	4	5	4	1	3	5	4	5	4	1	3	5	27.6	27.6	27.6	22.11	199	199;198;271	0	11.886	By MS/MS	By MS/MS	By MS/MS	By MS/MS	By MS/MS	By MS/MS	18.1	22.6	18.6	3.5	13.1	22.6
Q07020-2;Q07020	Q07020-2;Q07020	6;6	6;6	6;6	60S ribosomal protein L18	RPL18	Isoform 2 of 60S ribosomal protein L18 OS=Homo sapiens GN=RPL18;60S ribosomal protein L18 OS=Homo sapiens GN=RPL18 PE=1 SV=2	2	6	6	6	3	2	4	4	5	5	3	2	4	4	5	5	3	2	4	4	5	5	34	34	34	18.091	159	159;188	0	46.983	By MS/MS	By MS/MS	By MS/MS	By MS/MS	By MS/MS	By MS/MS	22	13.8	27	27	27.7	33.3
Q07157-2;Q07157	Q07157-2;Q07157	2;2	2;2	2;2	Tight junction protein ZO-1	TJP1	Isoform Short of Tight junction protein ZO-1 OS=Homo sapiens GN=TJP1;Tight junction protein ZO-1 OS=Homo sapiens GN=TJP1 PE=1 SV=3	2	2	2	2	0	2	2	2	2	2	0	2	2	2	2	2	0	2	2	2	2	2	1.4	1.4	1.4	186.96	1668	1668;1748	0	4.3809		By MS/MS	By matching	By MS/MS	By MS/MS	By MS/MS	0	1.4	1.4	1.4	1.4	1.4
Q07666;Q07666-2;Q07666-3	Q07666;Q07666-2;Q07666-3	2;2;1	2;2;1	2;2;1	KH domain-containing, RNA-binding, signal transduction-associated protein 1	KHDRBS1	KH domain-containing, RNA-binding, signal transduction-associated protein 1 OS=Homo sapiens GN=KHDRBS1 PE=1 SV=1;Isoform 2 of KH domain-containing, RNA-binding, signal transduction-associated protein 1 OS=Homo sapiens GN=KHDRBS1;Isoform 3 of KH domain-cont	3	2	2	2	0	0	0	2	2	0	0	0	0	2	2	0	0	0	0	2	2	0	5.4	5.4	5.4	48.227	443	443;418;404	0	3.3884				By MS/MS	By MS/MS		0	0	0	5.4	5.4	0
Q07812-4;Q07812-5;Q07812-8;Q07812;Q07812-2	Q07812-4;Q07812-5;Q07812-8;Q07812;Q07812-2	1;1;1;1;1	1;1;1;1;1	1;1;1;1;1	Apoptosis regulator BAX	BAX	Isoform Delta of Apoptosis regulator BAX OS=Homo sapiens GN=BAX;Isoform Epsilon of Apoptosis regulator BAX OS=Homo sapiens GN=BAX;Isoform Sigma of Apoptosis regulator BAX OS=Homo sapiens GN=BAX;Apoptosis regulator BAX OS=Homo sapiens GN=BAX PE=1 SV=1;Isofo	5	1	1	1	0	0	0	1	1	0	0	0	0	1	1	0	0	0	0	1	1	0	8.4	8.4	8.4	15.772	143	143;164;179;192;218	0.0014461	2.1154				By MS/MS	By MS/MS		0	0	0	8.4	8.4	0
Q07955;Q07955-3;Q07955-2	Q07955;Q07955-3;Q07955-2	14;13;13	14;13;13	14;13;13	Serine/arginine-rich splicing factor 1	SRSF1	Serine/arginine-rich splicing factor 1 OS=Homo sapiens GN=SRSF1 PE=1 SV=2;Isoform ASF-3 of Serine/arginine-rich splicing factor 1 OS=Homo sapiens GN=SRSF1;Isoform ASF-2 of Serine/arginine-rich splicing factor 1 OS=Homo sapiens GN=SRSF1	3	14	14	14	13	12	14	6	6	13	13	12	14	6	6	13	13	12	14	6	6	13	45.2	45.2	45.2	27.744	248	248;201;292	0	36.733	By MS/MS	By MS/MS	By MS/MS	By MS/MS	By MS/MS	By MS/MS	45.2	45.2	45.2	25.8	21.8	45.2
Q08170	Q08170	13	8	8	Serine/arginine-rich splicing factor 4	SRSF4	Serine/arginine-rich splicing factor 4 OS=Homo sapiens GN=SRSF4 PE=1 SV=2	1	13	8	8	8	9	10	2	3	13	5	4	5	2	2	8	5	4	5	2	2	8	21.5	14.4	14.4	56.678	494	494	0	73.835	By MS/MS	By MS/MS	By MS/MS	By MS/MS	By MS/MS	By MS/MS	13.4	17.2	17.2	5.1	6.5	21.5
Q08211;Q08211-2	Q08211	7;1	7;1	7;1	ATP-dependent RNA helicase A	DHX9	ATP-dependent RNA helicase A OS=Homo sapiens GN=DHX9 PE=1 SV=4	2	7	7	7	2	2	4	7	7	3	2	2	4	7	7	3	2	2	4	7	7	3	7	7	7	140.96	1270	1270;235	0	53.651	By MS/MS	By MS/MS	By matching	By MS/MS	By MS/MS	By MS/MS	1.7	1.7	3.1	7	7	2.4
Q08945	Q08945	7	7	7	FACT complex subunit SSRP1	SSRP1	FACT complex subunit SSRP1 OS=Homo sapiens GN=SSRP1 PE=1 SV=1	1	7	7	7	5	6	6	0	1	6	5	6	6	0	1	6	5	6	6	0	1	6	9.7	9.7	9.7	81.074	709	709	0	13.965	By MS/MS	By MS/MS	By MS/MS		By MS/MS	By MS/MS	7.5	8.6	8	0	1.1	8
Q08AD1-2;Q08AD1-3;Q08AD1;Q9P1Y5;Q9P1Y5-2	Q08AD1-2;Q08AD1-3;Q08AD1	15;15;15;1;1	15;15;15;1;1	15;15;15;1;1	Calmodulin-regulated spectrin-associated protein 2	CAMSAP2	Isoform 2 of Calmodulin-regulated spectrin-associated protein 2 OS=Homo sapiens GN=CAMSAP2;Isoform 3 of Calmodulin-regulated spectrin-associated protein 2 OS=Homo sapiens GN=CAMSAP2;Calmodulin-regulated spectrin-associated protein 2 OS=Homo sapiens GN=CAMS	5	15	15	15	0	1	2	14	15	2	0	1	2	14	15	2	0	1	2	14	15	2	11.4	11.4	11.4	165.06	1462	1462;1478;1489;1249;1276	0	258.16		By MS/MS	By MS/MS	By MS/MS	By MS/MS	By MS/MS	0	0.5	1.8	10.6	11.4	1.8
Q08AM6	Q08AM6	2	2	2	Protein VAC14 homolog	VAC14	Protein VAC14 homolog OS=Homo sapiens GN=VAC14 PE=1 SV=1	1	2	2	2	0	0	0	2	2	0	0	0	0	2	2	0	0	0	0	2	2	0	3.1	3.1	3.1	87.972	782	782	0	4.3249				By MS/MS	By MS/MS		0	0	0	3.1	3.1	0
Q08J23-2;Q08J23	Q08J23-2;Q08J23	1;1	1;1	1;1	tRNA (cytosine(34)-C(5))-methyltransferase	NSUN2	Isoform 2 of tRNA (cytosine(34)-C(5))-methyltransferase OS=Homo sapiens GN=NSUN2;tRNA (cytosine(34)-C(5))-methyltransferase OS=Homo sapiens GN=NSUN2 PE=1 SV=2	2	1	1	1	0	0	0	1	1	0	0	0	0	1	1	0	0	0	0	1	1	0	1.5	1.5	1.5	82.392	732	732;767	0	2.7387				By MS/MS	By MS/MS		0	0	0	1.5	1.5	0
Q09161	Q09161	3	3	3	Nuclear cap-binding protein subunit 1	NCBP1	Nuclear cap-binding protein subunit 1 OS=Homo sapiens GN=NCBP1 PE=1 SV=1	1	3	3	3	0	0	0	2	3	0	0	0	0	2	3	0	0	0	0	2	3	0	4.3	4.3	4.3	91.838	790	790	0	7.2262				By MS/MS	By MS/MS		0	0	0	2.7	4.3	0
Q09666	Q09666	27	27	27	Neuroblast differentiation-associated protein AHNAK	AHNAK	Neuroblast differentiation-associated protein AHNAK OS=Homo sapiens GN=AHNAK PE=1 SV=2	1	27	27	27	16	16	11	8	9	16	16	16	11	8	9	16	16	16	11	8	9	16	8.9	8.9	8.9	629.09	5890	5890	0	82.142	By MS/MS	By MS/MS	By MS/MS	By MS/MS	By MS/MS	By MS/MS	5.7	5.3	3.2	3.7	3.9	4.7
Q12768	Q12768	1	1	1	WASH complex subunit strumpellin	KIAA0196	WASH complex subunit 5 OS=Homo sapiens GN=WASHC5 PE=1 SV=1	1	1	1	1	0	0	0	1	1	0	0	0	0	1	1	0	0	0	0	1	1	0	1	1	1	134.28	1159	1159	0.0046605	1.669				By MS/MS	By matching		0	0	0	1	1	0
Q12769;Q12769-2;Q12769-3	Q12769	3;1;1	3;1;1	3;1;1	Nuclear pore complex protein Nup160	NUP160	Nuclear pore complex protein Nup160 OS=Homo sapiens GN=NUP160 PE=1 SV=3	3	3	3	3	0	0	0	3	2	0	0	0	0	3	2	0	0	0	0	3	2	0	2.4	2.4	2.4	162.12	1436	1436;224;485	0	60.45				By MS/MS	By MS/MS		0	0	0	2.4	1.6	0
Q12788	Q12788	3	3	3	Transducin beta-like protein 3	TBL3	Transducin beta-like protein 3 OS=Homo sapiens GN=TBL3 PE=1 SV=2	1	3	3	3	0	0	0	3	2	0	0	0	0	3	2	0	0	0	0	3	2	0	5.6	5.6	5.6	89.034	808	808	0	12.625				By MS/MS	By MS/MS		0	0	0	5.6	3.3	0
Q12789-3;Q12789	Q12789-3;Q12789	3;3	3;3	3;3	General transcription factor 3C polypeptide 1	GTF3C1	Isoform 2 of General transcription factor 3C polypeptide 1 OS=Homo sapiens GN=GTF3C1;General transcription factor 3C polypeptide 1 OS=Homo sapiens GN=GTF3C1 PE=1 SV=4	2	3	3	3	0	0	0	2	2	0	0	0	0	2	2	0	0	0	0	2	2	0	3	3	3	236.28	2084	2084;2109	0	5.2026				By MS/MS	By MS/MS		0	0	0	2.4	1.3	0
Q12792-4;Q12792	Q12792-4;Q12792	1;1	1;1	1;1	Twinfilin-1	TWF1	Isoform 4 of Twinfilin-1 OS=Homo sapiens GN=TWF1;Twinfilin-1 OS=Homo sapiens GN=TWF1 PE=1 SV=3	2	1	1	1	0	0	0	1	1	0	0	0	0	1	1	0	0	0	0	1	1	0	5.2	5.2	5.2	28.823	252	252;350	0	25.282				By MS/MS	By MS/MS		0	0	0	5.2	5.2	0
Q12797-7;Q12797-6;Q12797-2;Q12797	Q12797-7;Q12797-6;Q12797-2;Q12797	2;2;2;2	2;2;2;2	2;2;2;2	Aspartyl/asparaginyl beta-hydroxylase	ASPH	Isoform 7 of Aspartyl/asparaginyl beta-hydroxylase OS=Homo sapiens GN=ASPH;Isoform 6 of Aspartyl/asparaginyl beta-hydroxylase OS=Homo sapiens GN=ASPH;Isoform 2 of Aspartyl/asparaginyl beta-hydroxylase OS=Homo sapiens GN=ASPH;Aspartyl/asparaginyl beta-hydro	4	2	2	2	0	1	1	2	2	1	0	1	1	2	2	1	0	1	1	2	2	1	12.8	12.8	12.8	21.963	203	203;270;313;758	0	54.122		By MS/MS	By matching	By MS/MS	By MS/MS	By matching	0	12.3	12.3	12.8	12.8	12.3
Q12805-5;Q12805-2;Q12805-4;Q12805-3;Q12805	Q12805-5;Q12805-2;Q12805-4;Q12805-3;Q12805	1;1;1;1;1	1;1;1;1;1	1;1;1;1;1	EGF-containing fibulin-like extracellular matrix protein 1	EFEMP1	Isoform 5 of EGF-containing fibulin-like extracellular matrix protein 1 OS=Homo sapiens GN=EFEMP1;Isoform 2 of EGF-containing fibulin-like extracellular matrix protein 1 OS=Homo sapiens GN=EFEMP1;Isoform 4 of EGF-containing fibulin-like extracellular matri	5	1	1	1	0	0	1	0	0	1	0	0	1	0	0	1	0	0	1	0	0	1	3.9	3.9	3.9	39.195	355	355;485;492;492;493	0.00073475	2.2197			By MS/MS			By MS/MS	0	0	3.9	0	0	3.9
Q12830-4;Q12830-2;Q12830	Q12830-4;Q12830-2;Q12830	3;3;3	3;3;3	3;3;3	Nucleosome-remodeling factor subunit BPTF	BPTF	Isoform 4 of Nucleosome-remodeling factor subunit BPTF OS=Homo sapiens GN=BPTF;Isoform 2 of Nucleosome-remodeling factor subunit BPTF OS=Homo sapiens GN=BPTF;Nucleosome-remodeling factor subunit BPTF OS=Homo sapiens GN=BPTF PE=1 SV=3	3	3	3	3	1	1	0	3	3	0	1	1	0	3	3	0	1	1	0	3	3	0	2.1	2.1	2.1	322.21	2903	2903;2920;3046	0	22.815	By matching	By matching		By MS/MS	By MS/MS		0.4	0.4	0	2.1	2.1	0
Q12834	Q12834	1	1	1	Cell division cycle protein 20 homolog	CDC20	Cell division cycle protein 20 homolog OS=Homo sapiens GN=CDC20 PE=1 SV=2	1	1	1	1	0	0	1	1	1	0	0	0	1	1	1	0	0	0	1	1	1	0	2.4	2.4	2.4	54.722	499	499	0.0078074	1.5241			By matching	By MS/MS	By MS/MS		0	0	2.4	2.4	2.4	0
Q12872;Q12872-2	Q12872;Q12872-2	6;6	6;6	6;6	Splicing factor, suppressor of white-apricot homolog	SFSWAP	Splicing factor, suppressor of white-apricot homolog OS=Homo sapiens GN=SFSWAP PE=1 SV=3;Isoform 2 of Splicing factor, suppressor of white-apricot homolog OS=Homo sapiens GN=SFSWAP	2	6	6	6	6	4	4	0	0	4	6	4	4	0	0	4	6	4	4	0	0	4	6.7	6.7	6.7	104.82	951	951;1003	0	41.796	By MS/MS	By MS/MS	By MS/MS			By MS/MS	6.7	3.7	3.7	0	0	3.7
Q12873-2;Q12873;Q12873-3	Q12873-2;Q12873;Q12873-3	3;3;3	3;3;3	3;3;3	Chromodomain-helicase-DNA-binding protein 3	CHD3	Isoform 2 of Chromodomain-helicase-DNA-binding protein 3 OS=Homo sapiens GN=CHD3;Chromodomain-helicase-DNA-binding protein 3 OS=Homo sapiens GN=CHD3 PE=1 SV=3;Isoform 3 of Chromodomain-helicase-DNA-binding protein 3 OS=Homo sapiens GN=CHD3	3	3	3	3	1	2	2	3	3	1	1	2	2	3	3	1	1	2	2	3	3	1	1.9	1.9	1.9	222.86	1966	1966;2000;2059	0	19.034	By matching	By MS/MS	By MS/MS	By MS/MS	By MS/MS	By MS/MS	0.9	1.6	1.6	1.9	1.9	0.9
Q12904;Q12904-2	Q12904;Q12904-2	3;2	3;2	3;2	Aminoacyl tRNA synthase complex-interacting multifunctional protein 1;Endothelial monocyte-activating polypeptide 2	AIMP1	Aminoacyl tRNA synthase complex-interacting multifunctional protein 1 OS=Homo sapiens GN=AIMP1 PE=1 SV=2;Isoform 2 of Aminoacyl tRNA synthase complex-interacting multifunctional protein 1 OS=Homo sapiens GN=AIMP1	2	3	3	3	0	2	1	0	0	2	0	2	1	0	0	2	0	2	1	0	0	2	10.6	10.6	10.6	34.352	312	312;336	0	3.4601		By MS/MS	By MS/MS			By MS/MS	0	5.1	2.6	0	0	8
Q12906;Q12906-7;Q12906-5;Q12906-4;Q12906-2;Q12906-6;Q12906-3	Q12906;Q12906-7;Q12906-5;Q12906-4;Q12906-2;Q12906-6;Q12906-3	2;2;1;1;1;1;1	2;2;1;1;1;1;1	2;2;1;1;1;1;1	Interleukin enhancer-binding factor 3	ILF3	Interleukin enhancer-binding factor 3 OS=Homo sapiens GN=ILF3 PE=1 SV=3;Isoform 7 of Interleukin enhancer-binding factor 3 OS=Homo sapiens GN=ILF3;Isoform 5 of Interleukin enhancer-binding factor 3 OS=Homo sapiens GN=ILF3;Isoform 4 of Interleukin enhancer-	7	2	2	2	1	0	1	0	0	2	1	0	1	0	0	2	1	0	1	0	0	2	4.9	4.9	4.9	95.337	894	894;898;690;698;702;706;764	0	5.0264	By MS/MS		By MS/MS			By MS/MS	1.1	0	1.1	0	0	4.9
Q12931-2;Q12931	Q12931-2;Q12931	3;3	3;3	3;3	Heat shock protein 75 kDa, mitochondrial	TRAP1	Isoform 2 of Heat shock protein 75 kDa, mitochondrial OS=Homo sapiens GN=TRAP1;Heat shock protein 75 kDa, mitochondrial OS=Homo sapiens GN=TRAP1 PE=1 SV=3	2	3	3	3	0	0	0	3	2	0	0	0	0	3	2	0	0	0	0	3	2	0	5.4	5.4	5.4	74.267	651	651;704	0	24.155				By MS/MS	By MS/MS		0	0	0	5.4	3.5	0
Q12965;O00160	Q12965	9;1	9;1	9;1	Unconventional myosin-Ie	MYO1E	Unconventional myosin-Ie OS=Homo sapiens GN=MYO1E PE=1 SV=2	2	9	9	9	1	3	2	7	8	1	1	3	2	7	8	1	1	3	2	7	8	1	8.8	8.8	8.8	127.06	1108	1108;1098	0	67.541	By MS/MS	By MS/MS	By MS/MS	By MS/MS	By MS/MS	By MS/MS	1.8	3.2	2.6	7	7.9	1.8
Q12979-4;Q12979-2;Q12979	Q12979-4;Q12979-2;Q12979	1;1;1	1;1;1	1;1;1	Active breakpoint cluster region-related protein	ABR	Isoform 4 of Active breakpoint cluster region-related protein OS=Homo sapiens GN=ABR;Isoform Short of Active breakpoint cluster region-related protein OS=Homo sapiens GN=ABR;Active breakpoint cluster region-related protein OS=Homo sapiens GN=ABR PE=2 SV=2	3	1	1	1	1	0	0	1	1	0	1	0	0	1	1	0	1	0	0	1	1	0	1.6	1.6	1.6	92.424	813	813;822;859	0	7.3297	By matching			By MS/MS	By MS/MS		1.6	0	0	1.6	1.6	0
Q12986-3;Q12986-2;Q12986	Q12986-3;Q12986-2;Q12986	4;4;4	4;4;4	4;4;4	Transcriptional repressor NF-X1	NFX1	Isoform 3 of Transcriptional repressor NF-X1 OS=Homo sapiens GN=NFX1;Isoform 2 of Transcriptional repressor NF-X1 OS=Homo sapiens GN=NFX1;Transcriptional repressor NF-X1 OS=Homo sapiens GN=NFX1 PE=1 SV=2	3	4	4	4	1	3	4	1	1	3	1	3	4	1	1	3	1	3	4	1	1	3	7	7	7	92.679	833	833;1024;1120	0	30.693	By matching	By MS/MS	By MS/MS	By MS/MS	By matching	By MS/MS	1.6	4.7	7	1.6	1.6	4.7
Q13045-2;Q13045-3;Q13045	Q13045-2;Q13045-3;Q13045	2;2;2	2;2;2	2;2;2	Protein flightless-1 homolog	FLII	Isoform 2 of Protein flightless-1 homolog OS=Homo sapiens GN=FLII;Isoform 3 of Protein flightless-1 homolog OS=Homo sapiens GN=FLII;Protein flightless-1 homolog OS=Homo sapiens GN=FLII PE=1 SV=2	3	2	2	2	0	0	0	2	2	0	0	0	0	2	2	0	0	0	0	2	2	0	2.1	2.1	2.1	138.49	1214	1214;1258;1269	0	38.18				By MS/MS	By MS/MS		0	0	0	2.1	2.1	0
Q13111	Q13111	3	3	3	Chromatin assembly factor 1 subunit A	CHAF1A	Chromatin assembly factor 1 subunit A OS=Homo sapiens GN=CHAF1A PE=1 SV=2	1	3	3	3	2	1	3	0	0	3	2	1	3	0	0	3	2	1	3	0	0	3	5.3	5.3	5.3	106.92	956	956	0	17.1	By MS/MS	By MS/MS	By MS/MS			By MS/MS	3.1	1	5.3	0	0	5.3
Q13112	Q13112	1	1	1	Chromatin assembly factor 1 subunit B	CHAF1B	Chromatin assembly factor 1 subunit B OS=Homo sapiens GN=CHAF1B PE=1 SV=1	1	1	1	1	0	0	0	1	1	0	0	0	0	1	1	0	0	0	0	1	1	0	2.7	2.7	2.7	61.492	559	559	0.00074906	2.3058				By MS/MS	By MS/MS		0	0	0	2.7	2.7	0
Q13127;Q13127-3;Q13127-4	Q13127;Q13127-3;Q13127-4	2;1;1	2;1;1	2;1;1	RE1-silencing transcription factor	REST	RE1-silencing transcription factor OS=Homo sapiens GN=REST PE=1 SV=3;Isoform 3 of RE1-silencing transcription factor OS=Homo sapiens GN=REST;Isoform 4 of RE1-silencing transcription factor OS=Homo sapiens GN=REST	3	2	2	2	2	2	1	0	0	1	2	2	1	0	0	1	2	2	1	0	0	1	2.2	2.2	2.2	121.87	1097	1097;329;1074	0	5.3657	By MS/MS	By MS/MS	By MS/MS			By MS/MS	2.2	2.2	1.2	0	0	1.2
Q13148;Q13148-4	Q13148	3;1	3;1	3;1	TAR DNA-binding protein 43	TARDBP	TAR DNA-binding protein 43 OS=Homo sapiens GN=TARDBP PE=1 SV=1	2	3	3	3	0	0	1	3	3	1	0	0	1	3	3	1	0	0	1	3	3	1	6.8	6.8	6.8	44.739	414	414;298	0	5.7579			By matching	By MS/MS	By MS/MS	By matching	0	0	2.2	6.8	6.8	2.2
Q13151	Q13151	5	5	5	Heterogeneous nuclear ribonucleoprotein A0	HNRNPA0	Heterogeneous nuclear ribonucleoprotein A0 OS=Homo sapiens GN=HNRNPA0 PE=1 SV=1	1	5	5	5	3	3	3	5	5	1	3	3	3	5	5	1	3	3	3	5	5	1	16.7	16.7	16.7	30.84	305	305	0	15.099	By MS/MS	By MS/MS	By MS/MS	By MS/MS	By MS/MS	By MS/MS	12.8	11.8	11.8	16.7	16.7	4.3
Q13155	Q13155	1	1	1	Aminoacyl tRNA synthase complex-interacting multifunctional protein 2	AIMP2	Aminoacyl tRNA synthase complex-interacting multifunctional protein 2 OS=Homo sapiens GN=AIMP2 PE=1 SV=2	1	1	1	1	0	0	1	1	1	0	0	0	1	1	1	0	0	0	1	1	1	0	4.1	4.1	4.1	35.348	320	320	0.00072833	2.1587			By MS/MS	By MS/MS	By MS/MS		0	0	4.1	4.1	4.1	0
Q13177	Q13177	3	3	3	Serine/threonine-protein kinase PAK 2;PAK-2p27;PAK-2p34	PAK2	Serine/threonine-protein kinase PAK 2 OS=Homo sapiens GN=PAK2 PE=1 SV=3	1	3	3	3	0	0	0	3	2	0	0	0	0	3	2	0	0	0	0	3	2	0	8.6	8.6	8.6	58.042	524	524	0	39.423				By MS/MS	By MS/MS		0	0	0	8.6	4.8	0
Q13185	Q13185	4	4	4	Chromobox protein homolog 3	CBX3	Chromobox protein homolog 3 OS=Homo sapiens GN=CBX3 PE=1 SV=4	1	4	4	4	4	4	4	0	1	4	4	4	4	0	1	4	4	4	4	0	1	4	20.2	20.2	20.2	20.811	183	183	0	35.828	By MS/MS	By MS/MS	By MS/MS		By matching	By MS/MS	20.2	20.2	20.2	0	6.6	20.2
Q13200-2;Q13200-3;Q13200	Q13200-2;Q13200-3;Q13200	3;3;3	3;3;3	3;3;3	26S proteasome non-ATPase regulatory subunit 2	PSMD2	Isoform 2 of 26S proteasome non-ATPase regulatory subunit 2 OS=Homo sapiens GN=PSMD2;Isoform 3 of 26S proteasome non-ATPase regulatory subunit 2 OS=Homo sapiens GN=PSMD2;26S proteasome non-ATPase regulatory subunit 2 OS=Homo sapiens GN=PSMD2 PE=1 SV=3	3	3	3	3	0	0	1	3	3	0	0	0	1	3	3	0	0	0	1	3	3	0	5.1	5.1	5.1	82.193	749	749;778;908	0	6.2608			By matching	By MS/MS	By MS/MS		0	0	2	5.1	5.1	0
Q13206	Q13206	2	2	2	Probable ATP-dependent RNA helicase DDX10	DDX10	Probable ATP-dependent RNA helicase DDX10 OS=Homo sapiens GN=DDX10 PE=1 SV=2	1	2	2	2	0	1	1	1	1	1	0	1	1	1	1	1	0	1	1	1	1	1	3.7	3.7	3.7	100.89	875	875	0	22.011		By MS/MS	By matching	By MS/MS	By matching	By matching	0	1.7	1.7	1.9	1.9	1.7
Q13217	Q13217	1	1	1	DnaJ homolog subfamily C member 3	DNAJC3	DnaJ homolog subfamily C member 3 OS=Homo sapiens GN=DNAJC3 PE=1 SV=1	1	1	1	1	0	0	0	1	1	0	0	0	0	1	1	0	0	0	0	1	1	0	3.4	3.4	3.4	57.579	504	504	0	3.2055				By matching	By MS/MS		0	0	0	3.4	3.4	0
Q13242	Q13242	1	1	1	Serine/arginine-rich splicing factor 9	SRSF9	Serine/arginine-rich splicing factor 9 OS=Homo sapiens GN=SRSF9 PE=1 SV=1	1	1	1	1	1	1	0	0	0	1	1	1	0	0	0	1	1	1	0	0	0	1	5	5	5	25.542	221	221	0	2.8338	By MS/MS	By matching				By MS/MS	5	5	0	0	0	5
Q13243;Q13243-3;Q13243-2	Q13243;Q13243-3	3;3;1	2;2;1	2;2;1	Serine/arginine-rich splicing factor 5	SRSF5	Serine/arginine-rich splicing factor 5 OS=Homo sapiens GN=SRSF5 PE=1 SV=1;Isoform SRP40-4 of Serine/arginine-rich splicing factor 5 OS=Homo sapiens GN=SRSF5	3	3	2	2	2	2	3	1	0	3	1	1	2	1	0	2	1	1	2	1	0	2	10.3	7	7	31.263	272	272;269;107	0	10.9	By MS/MS	By MS/MS	By MS/MS	By matching		By MS/MS	7.7	7.7	10.3	4.4	0	10.3
Q13247;Q13247-3;Q13247-2	Q13247;Q13247-3	13;13;6	13;13;6	8;8;4	Serine/arginine-rich splicing factor 6	SRSF6	Serine/arginine-rich splicing factor 6 OS=Homo sapiens GN=SRSF6 PE=1 SV=2;Isoform SRP55-3 of Serine/arginine-rich splicing factor 6 OS=Homo sapiens GN=SRSF6	3	13	13	8	10	9	11	3	3	11	10	9	11	3	3	11	7	4	6	3	2	6	30.5	30.5	23.8	39.586	344	344;335;135	0	104.13	By MS/MS	By MS/MS	By MS/MS	By MS/MS	By matching	By MS/MS	23.3	19.8	25.6	9.3	7.6	23.5
Q13263-2;Q13263	Q13263-2;Q13263	1;1	1;1	1;1	Transcription intermediary factor 1-beta	TRIM28	Isoform 2 of Transcription intermediary factor 1-beta OS=Homo sapiens GN=TRIM28;Transcription intermediary factor 1-beta OS=Homo sapiens GN=TRIM28 PE=1 SV=5	2	1	1	1	0	0	0	1	1	0	0	0	0	1	1	0	0	0	0	1	1	0	4.1	4.1	4.1	79.473	753	753;835	0	11.221				By MS/MS	By MS/MS		0	0	0	4.1	4.1	0
Q13268;Q13268-2	Q13268;Q13268-2	2;2	2;2	2;2	Dehydrogenase/reductase SDR family member 2, mitochondrial	DHRS2	Dehydrogenase/reductase SDR family member 2, mitochondrial OS=Homo sapiens GN=DHRS2 PE=1 SV=4;Isoform 2 of Dehydrogenase/reductase SDR family member 2, mitochondrial OS=Homo sapiens GN=DHRS2	2	2	2	2	1	1	2	2	2	1	1	1	2	2	2	1	1	1	2	2	2	1	6.8	6.8	6.8	29.926	280	280;300	0	3.86	By matching	By MS/MS	By MS/MS	By MS/MS	By MS/MS	By MS/MS	3.2	3.6	6.8	6.8	6.8	3.2
Q13283;Q13283-2	Q13283;Q13283-2	2;1	2;1	2;1	Ras GTPase-activating protein-binding protein 1	G3BP1	Ras GTPase-activating protein-binding protein 1 OS=Homo sapiens GN=G3BP1 PE=1 SV=1;Isoform 2 of Ras GTPase-activating protein-binding protein 1 OS=Homo sapiens GN=G3BP1	2	2	2	2	0	1	1	2	2	1	0	1	1	2	2	1	0	1	1	2	2	1	4.9	4.9	4.9	52.164	466	466;122	0	8.4192		By matching	By matching	By MS/MS	By MS/MS	By MS/MS	0	2.4	2.4	4.9	4.9	2.4
Q13315	Q13315	5	5	5	Serine-protein kinase ATM	ATM	Serine-protein kinase ATM OS=Homo sapiens GN=ATM PE=1 SV=4	1	5	5	5	0	0	0	5	4	0	0	0	0	5	4	0	0	0	0	5	4	0	2.3	2.3	2.3	350.68	3056	3056	0	19.686				By MS/MS	By MS/MS		0	0	0	2.3	1.8	0
Q13330-3;Q13330;Q13330-2;Q9BTC8-2;Q9BTC8	Q13330-3;Q13330;Q13330-2;Q9BTC8-2;Q9BTC8	2;2;1;1;1	2;2;1;1;1	2;2;1;1;1	Metastasis-associated protein MTA1;Metastasis-associated protein MTA3	MTA1;MTA3	Isoform 3 of Metastasis-associated protein MTA1 OS=Homo sapiens GN=MTA1;Metastasis-associated protein MTA1 OS=Homo sapiens GN=MTA1 PE=1 SV=2;Isoform Short of Metastasis-associated protein MTA1 OS=Homo sapiens GN=MTA1;Isoform 2 of Metastasis-associated prot	5	2	2	2	0	2	0	2	1	2	0	2	0	2	1	2	0	2	0	2	1	2	3	3	3	79.192	698	698;715;430;515;594	0	3.9039		By MS/MS		By MS/MS	By MS/MS	By MS/MS	0	3	0	3	1.3	3
Q13404-8;Q13404;Q13404-6;Q13404-7;Q13404-2;Q13404-1	Q13404-8;Q13404;Q13404-6;Q13404-7;Q13404-2;Q13404-1	2;2;1;1;1;1	2;2;1;1;1;1	2;2;1;1;1;1	Ubiquitin-conjugating enzyme E2 variant 1	UBE2V1	Isoform 6 of Ubiquitin-conjugating enzyme E2 variant 1 OS=Homo sapiens GN=UBE2V1;Ubiquitin-conjugating enzyme E2 variant 1 OS=Homo sapiens GN=UBE2V1 PE=1 SV=2;Isoform 4 of Ubiquitin-conjugating enzyme E2 variant 1 OS=Homo sapiens GN=UBE2V1;Isoform 5 of Ubi	6	2	2	2	0	0	0	2	1	0	0	0	0	2	1	0	0	0	0	2	1	0	26.7	26.7	26.7	11.765	105	105;147;103;170;170;221	0	4.7952				By MS/MS	By MS/MS		0	0	0	26.7	11.4	0
Q13427;Q13427-2	Q13427;Q13427-2	8;5	8;5	8;5	Peptidyl-prolyl cis-trans isomerase G	PPIG	Peptidyl-prolyl cis-trans isomerase G OS=Homo sapiens GN=PPIG PE=1 SV=2;Isoform 2 of Peptidyl-prolyl cis-trans isomerase G OS=Homo sapiens GN=PPIG	2	8	8	8	6	5	6	4	4	7	6	5	6	4	4	7	6	5	6	4	4	7	10.6	10.6	10.6	88.616	754	754;357	0	101.03	By MS/MS	By MS/MS	By MS/MS	By MS/MS	By MS/MS	By MS/MS	8.2	6.8	8.4	5.4	5.4	9.2
Q13428-8;Q13428-3;Q13428-2;Q13428;Q13428-4;Q13428-5	Q13428-8;Q13428-3;Q13428-2;Q13428;Q13428-4	39;39;38;38;38;17	39;39;38;38;38;17	5;5;5;5;5;0	Treacle protein	TCOF1	Isoform 8 of Treacle protein OS=Homo sapiens GN=TCOF1;Isoform 3 of Treacle protein OS=Homo sapiens GN=TCOF1;Isoform 2 of Treacle protein OS=Homo sapiens GN=TCOF1;Treacle protein OS=Homo sapiens GN=TCOF1 PE=1 SV=3;Isoform 4 of Treacle protein OS=Homo sapien	6	39	39	5	27	27	31	20	21	33	27	27	31	20	21	33	5	4	4	4	5	5	28	28	4.4	144.41	1412	1412;1489;1411;1488;1524;958	0	224.45	By MS/MS	By MS/MS	By MS/MS	By MS/MS	By MS/MS	By MS/MS	20	21.9	25	18	17.6	25.2
Q13428-7;Q13428-6	Q13428-7;Q13428-6	37;36	3;3	3;3	Treacle protein	TCOF1	Isoform 7 of Treacle protein OS=Homo sapiens GN=TCOF1;Isoform 6 of Treacle protein OS=Homo sapiens GN=TCOF1	2	37	3	3	24	24	29	16	16	30	2	1	2	0	0	2	2	1	2	0	0	2	25.3	2.3	2.3	148.35	1451	1451;1450	0	10.596	By MS/MS	By MS/MS	By MS/MS	By matching	By matching	By MS/MS	17.2	19.1	22.1	13.3	12.9	22.6
Q13435	Q13435	3	3	3	Splicing factor 3B subunit 2	SF3B2	Splicing factor 3B subunit 2 OS=Homo sapiens GN=SF3B2 PE=1 SV=2	1	3	3	3	1	3	3	0	0	2	1	3	3	0	0	2	1	3	3	0	0	2	4	4	4	100.23	895	895	0	5.3669	By MS/MS	By MS/MS	By MS/MS			By MS/MS	0.8	4	4	0	0	2
Q13442	Q13442	10	10	10	28 kDa heat- and acid-stable phosphoprotein	PDAP1	28 kDa heat- and acid-stable phosphoprotein OS=Homo sapiens GN=PDAP1 PE=1 SV=1	1	10	10	10	5	8	7	1	1	9	5	8	7	1	1	9	5	8	7	1	1	9	48.6	48.6	48.6	20.63	181	181	0	323.31	By MS/MS	By MS/MS	By MS/MS	By matching	By matching	By MS/MS	26.5	41.4	31.5	10.5	10.5	48.1
Q13454-2;Q13454	Q13454-2;Q13454	2;2	2;2	2;2	Tumor suppressor candidate 3	TUSC3	Isoform 2 of Tumor suppressor candidate 3 OS=Homo sapiens GN=TUSC3;Tumor suppressor candidate 3 OS=Homo sapiens GN=TUSC3 PE=1 SV=1	2	2	2	2	0	0	0	1	2	0	0	0	0	1	2	0	0	0	0	1	2	0	5.2	5.2	5.2	39.558	347	347;348	0.00073584	2.2291				By MS/MS	By MS/MS		0	0	0	2.9	5.2	0
Q13501-2;Q13501	Q13501-2;Q13501	1;1	1;1	1;1	Sequestosome-1	SQSTM1	Isoform 2 of Sequestosome-1 OS=Homo sapiens GN=SQSTM1;Sequestosome-1 OS=Homo sapiens GN=SQSTM1 PE=1 SV=1	2	1	1	1	0	0	0	1	0	0	0	0	0	1	0	0	0	0	0	1	0	0	4.5	4.5	4.5	38.629	356	356;440	0	3.8214				By MS/MS			0	0	0	4.5	0	0
Q13509-2;Q13509;Q9BUF5	Q13509-2;Q13509;Q9BUF5	3;3;2	1;1;1	1;1;1	Tubulin beta-3 chain;Tubulin beta-6 chain	TUBB3;TUBB6	Isoform 2 of Tubulin beta-3 chain OS=Homo sapiens GN=TUBB3;Tubulin beta-3 chain OS=Homo sapiens GN=TUBB3 PE=1 SV=2;Tubulin beta-6 chain OS=Homo sapiens GN=TUBB6 PE=1 SV=1	3	3	1	1	1	1	1	3	3	1	0	0	0	1	1	0	0	0	0	1	1	0	8.7	3.2	3.2	42.432	378	378;450;446	0	6.1875	By matching	By matching	By matching	By MS/MS	By MS/MS	By matching	2.4	2.4	2.4	8.7	8.7	2.4
Q13523	Q13523	12	12	12	Serine/threonine-protein kinase PRP4 homolog	PRPF4B	Serine/threonine-protein kinase PRP4 homolog OS=Homo sapiens GN=PRPF4B PE=1 SV=3	1	12	12	12	10	9	7	2	5	10	10	9	7	2	5	10	10	9	7	2	5	10	12.1	12.1	12.1	116.99	1007	1007	0	63.471	By MS/MS	By MS/MS	By MS/MS	By MS/MS	By MS/MS	By MS/MS	9.5	9.1	5.9	1.6	6.2	9.6
Q13535-2;Q13535-3;Q13535	Q13535-2;Q13535-3;Q13535	2;2;2	2;2;2	2;2;2	Serine/threonine-protein kinase ATR	ATR	Isoform 2 of Serine/threonine-protein kinase ATR OS=Homo sapiens GN=ATR;Isoform 3 of Serine/threonine-protein kinase ATR OS=Homo sapiens GN=ATR;Serine/threonine-protein kinase ATR OS=Homo sapiens GN=ATR PE=1 SV=3	3	2	2	2	1	0	1	2	2	1	1	0	1	2	2	1	1	0	1	2	2	1	1	1	1	294.22	2580	2580;2610;2644	0	50.604	By matching		By matching	By MS/MS	By MS/MS	By MS/MS	0.5	0	0.5	1	1	0.5
Q13555-5;Q13555-10;Q13555-4;Q13555-6	Q13555-5;Q13555-10;Q13555-4;Q13555-6	2;1;1;1	2;1;1;1	2;1;1;1			Isoform 5 of Calcium/calmodulin-dependent protein kinase type II subunit gamma OS=Homo sapiens GN=CAMK2G;Isoform 10 of Calcium/calmodulin-dependent protein kinase type II subunit gamma OS=Homo sapiens GN=CAMK2G;Isoform 4 of Calcium/calmodulin-dependent pro	4	2	2	2	0	0	0	2	2	0	0	0	0	2	2	0	0	0	0	2	2	0	7.4	7.4	7.4	59.037	527	527;495;529;588	0	37.224				By MS/MS	By MS/MS		0	0	0	7.4	7.4	0
Q13573	Q13573	2	2	2	SNW domain-containing protein 1	SNW1	SNW domain-containing protein 1 OS=Homo sapiens GN=SNW1 PE=1 SV=1	1	2	2	2	2	2	2	2	2	1	2	2	2	2	2	1	2	2	2	2	2	1	4.7	4.7	4.7	61.494	536	536	0	10.944	By MS/MS	By MS/MS	By MS/MS	By MS/MS	By MS/MS	By MS/MS	4.7	4.7	4.7	4.7	4.7	1.9
Q13574-6;Q13574-2;Q13574-4;Q13574-7;Q13574-5;Q13574-3;Q13574;O75912	Q13574-6;Q13574-2;Q13574-4;Q13574-7;Q13574-5;Q13574-3;Q13574	3;3;3;3;3;3;3;1	3;3;3;3;3;3;3;1	3;3;3;3;3;3;3;1	Diacylglycerol kinase zeta	DGKZ	Isoform 6 of Diacylglycerol kinase zeta OS=Homo sapiens GN=DGKZ;Isoform 2 of Diacylglycerol kinase zeta OS=Homo sapiens GN=DGKZ;Isoform 4 of Diacylglycerol kinase zeta OS=Homo sapiens GN=DGKZ;Isoform 7 of Diacylglycerol kinase zeta OS=Homo sapiens GN=DGKZ;	8	3	3	3	2	1	0	0	0	1	2	1	0	0	0	1	2	1	0	0	0	1	5.3	5.3	5.3	101.23	906	906;928;929;933;934;945;1117;1065	0	5.4685	By MS/MS	By matching				By MS/MS	2.9	1.2	0	0	0	2.4
Q13595;Q13595-4;Q13595-3;Q13595-2	Q13595;Q13595-4;Q13595-3;Q13595-2	6;4;4;3	4;2;2;2	4;2;2;2	Transformer-2 protein homolog alpha	TRA2A	Transformer-2 protein homolog alpha OS=Homo sapiens GN=TRA2A PE=1 SV=1;Isoform 4 of Transformer-2 protein homolog alpha OS=Homo sapiens GN=TRA2A;Isoform 3 of Transformer-2 protein homolog alpha OS=Homo sapiens GN=TRA2A;Isoform Short of Transformer-2 protei	4	6	4	4	4	3	3	4	3	5	2	1	1	2	1	3	2	1	1	2	1	3	19.5	13.5	13.5	32.688	282	282;180;181;113	0	15.901	By MS/MS	By MS/MS	By MS/MS	By MS/MS	By matching	By MS/MS	14.5	9.6	9.6	13.5	9.6	19.5
Q13618-3;Q13618-2;Q13618	Q13618-3;Q13618-2;Q13618	1;1;1	1;1;1	1;1;1	Cullin-3	CUL3	Isoform 3 of Cullin-3 OS=Homo sapiens GN=CUL3;Isoform 2 of Cullin-3 OS=Homo sapiens GN=CUL3;Cullin-3 OS=Homo sapiens GN=CUL3 PE=1 SV=2	3	1	1	1	0	0	0	1	1	0	0	0	0	1	1	0	0	0	0	1	1	0	1.9	1.9	1.9	81.092	702	702;744;768	0.0083548	1.4353				By MS/MS	By MS/MS		0	0	0	1.9	1.9	0
Q13619-2;Q13619	Q13619-2;Q13619	2;2	2;2	2;2	Cullin-4A	CUL4A	Isoform 2 of Cullin-4A OS=Homo sapiens GN=CUL4A;Cullin-4A OS=Homo sapiens GN=CUL4A PE=1 SV=3	2	2	2	2	0	0	0	2	2	0	0	0	0	2	2	0	0	0	0	2	2	0	3.8	3.8	3.8	76.82	659	659;759	0	9.5069				By MS/MS	By MS/MS		0	0	0	3.8	3.8	0
Q13620-3;Q13620-1;Q13620	Q13620-3;Q13620-1;Q13620	1;1;1	1;1;1	1;1;1	Cullin-4B	CUL4B	Isoform 3 of Cullin-4B OS=Homo sapiens GN=CUL4B;Isoform 2 of Cullin-4B OS=Homo sapiens GN=CUL4B;Cullin-4B OS=Homo sapiens GN=CUL4B PE=1 SV=4	3	1	1	1	0	0	0	1	1	0	0	0	0	1	1	0	0	0	0	1	1	0	1.7	1.7	1.7	84.016	717	717;895;913	0	2.9998				By MS/MS	By MS/MS		0	0	0	1.7	1.7	0
Q13637	Q13637	1	1	1	Ras-related protein Rab-32	RAB32	Ras-related protein Rab-32 OS=Homo sapiens GN=RAB32 PE=1 SV=3	1	1	1	1	0	0	0	0	1	0	0	0	0	0	1	0	0	0	0	0	1	0	9.3	9.3	9.3	24.997	225	225	0	7.5712					By MS/MS		0	0	0	0	9.3	0
Q13642-1;Q13642-5;Q13642-4;Q13642;Q13642-3	Q13642-1;Q13642-5;Q13642-4;Q13642;Q13642-3	7;7;7;5;4	7;7;7;5;4	7;7;7;5;4	Four and a half LIM domains protein 1	FHL1	Isoform 1 of Four and a half LIM domains protein 1 OS=Homo sapiens GN=FHL1;Isoform 5 of Four and a half LIM domains protein 1 OS=Homo sapiens GN=FHL1;Isoform 4 of Four and a half LIM domains protein 1 OS=Homo sapiens GN=FHL1;Four and a half LIM domains pro	5	7	7	7	5	5	6	1	1	5	5	5	6	1	1	5	5	5	6	1	1	5	26.8	26.8	26.8	31.895	280	280;296;309;323;194	0	90.518	By MS/MS	By MS/MS	By MS/MS	By MS/MS	By MS/MS	By MS/MS	16.8	16.8	21.4	4.3	4.3	19.3
Q13671-2;Q13671	Q13671-2;Q13671	2;2	2;2	2;2	Ras and Rab interactor 1	RIN1	Isoform RIN1-delta of Ras and Rab interactor 1 OS=Homo sapiens GN=RIN1;Ras and Rab interactor 1 OS=Homo sapiens GN=RIN1 PE=1 SV=4	2	2	2	2	0	0	0	1	2	0	0	0	0	1	2	0	0	0	0	1	2	0	4	4	4	77.499	721	721;783	0	5.3011				By MS/MS	By MS/MS		0	0	0	2.4	4	0
Q13823	Q13823	6	6	6	Nucleolar GTP-binding protein 2	GNL2	Nucleolar GTP-binding protein 2 OS=Homo sapiens GN=GNL2 PE=1 SV=1	1	6	6	6	2	4	5	5	5	4	2	4	5	5	5	4	2	4	5	5	5	4	8.6	8.6	8.6	83.654	731	731	0	12.822	By MS/MS	By MS/MS	By MS/MS	By MS/MS	By MS/MS	By MS/MS	4.1	6.8	6.8	8.5	8.5	6.8
Q13895	Q13895	1	1	1	Bystin	BYSL	Bystin OS=Homo sapiens GN=BYSL PE=1 SV=3	1	1	1	1	0	0	0	1	1	0	0	0	0	1	1	0	0	0	0	1	1	0	4.6	4.6	4.6	49.601	437	437	0.0014306	2.0485				By MS/MS	By MS/MS		0	0	0	4.6	4.6	0
Q13907-2;Q13907;Q9BXS1	Q13907-2;Q13907;Q9BXS1	2;2;1	2;2;1	2;2;1	Isopentenyl-diphosphate Delta-isomerase 1;Isopentenyl-diphosphate delta-isomerase 2	IDI1;IDI2	Isoform 2 of Isopentenyl-diphosphate Delta-isomerase 1 OS=Homo sapiens GN=IDI1;Isopentenyl-diphosphate Delta-isomerase 1 OS=Homo sapiens GN=IDI1 PE=1 SV=2;Isopentenyl-diphosphate delta-isomerase 2 OS=Homo sapiens GN=IDI2 PE=1 SV=1	3	2	2	2	0	0	0	2	2	0	0	0	0	2	2	0	0	0	0	2	2	0	7.7	7.7	7.7	32.485	284	284;227;227	0	3.2849				By MS/MS	By MS/MS		0	0	0	7.7	7.7	0
Q14004;Q14004-2;Q00535-2;Q00536-2;Q00537;Q00537-2;Q07002-3;Q00536-3;Q00536;Q07002-2;Q07002;P11802-2;O94921-2;Q96Q40;Q96Q40-5;O94921-3;Q96Q40-3;Q96Q40-4;Q96Q40-2;P11802;Q00535;O94921	Q14004;Q14004-2	11;11;1;1;1;1;1;1;1;1;1;1;1;1;1;1;1;1;1;1;1;1	11;11;1;1;1;1;1;1;1;1;1;1;1;1;1;1;1;1;1;1;1;1	10;10;0;0;0;0;0;0;0;0;0;0;0;0;0;0;0;0;0;0;0;0	Cyclin-dependent kinase 13	CDK13	Cyclin-dependent kinase 13 OS=Homo sapiens GN=CDK13 PE=1 SV=2;Isoform 2 of Cyclin-dependent kinase 13 OS=Homo sapiens GN=CDK13	22	11	11	10	9	7	8	0	0	9	9	7	8	0	0	9	8	7	7	0	0	8	8.9	8.9	8.3	164.92	1512	1512;1452;260;570;523;523;504;502;496;474;472;183;451;435;429;423;400;384;358;303;292;469	0	72.228	By MS/MS	By MS/MS	By MS/MS			By MS/MS	6.7	5.5	6.5	0	0	7.3
Q14008-2;Q14008;Q14008-3	Q14008-2;Q14008;Q14008-3	1;1;1	1;1;1	1;1;1	Cytoskeleton-associated protein 5	CKAP5	Isoform 2 of Cytoskeleton-associated protein 5 OS=Homo sapiens GN=CKAP5;Cytoskeleton-associated protein 5 OS=Homo sapiens GN=CKAP5 PE=1 SV=3;Isoform 3 of Cytoskeleton-associated protein 5 OS=Homo sapiens GN=CKAP5	3	1	1	1	0	0	0	1	1	0	0	0	0	1	1	0	0	0	0	1	1	0	0.6	0.6	0.6	218.52	1972	1972;2032;2039	0	3.275				By MS/MS	By matching		0	0	0	0.6	0.6	0
Q14019	Q14019	1	1	1	Coactosin-like protein	COTL1	Coactosin-like protein OS=Homo sapiens GN=COTL1 PE=1 SV=3	1	1	1	1	0	0	0	1	1	0	0	0	0	1	1	0	0	0	0	1	1	0	7	7	7	15.945	142	142	0.0065531	1.5637				By MS/MS	By MS/MS		0	0	0	7	7	0
Q14103-3;Q14103;Q14103-4;Q14103-2	Q14103-3;Q14103;Q14103-4;Q14103-2	4;4;3;3	4;4;3;3	4;4;3;3	Heterogeneous nuclear ribonucleoprotein D0	HNRNPD	Isoform 3 of Heterogeneous nuclear ribonucleoprotein D0 OS=Homo sapiens GN=HNRNPD;Heterogeneous nuclear ribonucleoprotein D0 OS=Homo sapiens GN=HNRNPD PE=1 SV=1;Isoform 4 of Heterogeneous nuclear ribonucleoprotein D0 OS=Homo sapiens GN=HNRNPD;Isoform 2 of	4	4	4	4	1	2	3	4	4	2	1	2	3	4	4	2	1	2	3	4	4	2	17.6	17.6	17.6	32.834	306	306;355;287;336	0	20.337	By MS/MS	By MS/MS	By MS/MS	By MS/MS	By MS/MS	By MS/MS	4.6	7.8	13.7	17.6	17.6	7.2
Q14137;Q14137-2	Q14137;Q14137-2	2;1	2;1	2;1	Ribosome biogenesis protein BOP1	BOP1	Ribosome biogenesis protein BOP1 OS=Homo sapiens GN=BOP1 PE=1 SV=2;Isoform 2 of Ribosome biogenesis protein BOP1 OS=Homo sapiens GN=BOP1	2	2	2	2	0	0	1	2	2	1	0	0	1	2	2	1	0	0	1	2	2	1	3.2	3.2	3.2	83.629	746	746;634	0	4.1299			By MS/MS	By MS/MS	By MS/MS	By matching	0	0	1.9	3.2	3.2	1.9
Q14146	Q14146	8	8	8	Unhealthy ribosome biogenesis protein 2 homolog	URB2	Unhealthy ribosome biogenesis protein 2 homolog OS=Homo sapiens GN=URB2 PE=2 SV=2	1	8	8	8	0	0	2	6	6	0	0	0	2	6	6	0	0	0	2	6	6	0	5.7	5.7	5.7	170.54	1524	1524	0	33.91			By MS/MS	By MS/MS	By MS/MS		0	0	1.5	4.1	4.1	0
Q14151;Q14151-2	Q14151	5;1	3;1	3;1	Scaffold attachment factor B2	SAFB2	Scaffold attachment factor B2 OS=Homo sapiens GN=SAFB2 PE=1 SV=1	2	5	3	3	3	1	2	3	1	1	2	1	0	2	1	0	2	1	0	2	1	0	7.2	5.1	5.1	107.47	953	953;115	0	18.433	By MS/MS	By MS/MS	By matching	By MS/MS	By MS/MS	By matching	3.5	1.4	2.1	4.7	2.8	1.2
Q14152;Q14152-2	Q14152;Q14152-2	10;9	10;9	10;9	Eukaryotic translation initiation factor 3 subunit A	EIF3A	Eukaryotic translation initiation factor 3 subunit A OS=Homo sapiens GN=EIF3A PE=1 SV=1;Isoform 2 of Eukaryotic translation initiation factor 3 subunit A OS=Homo sapiens GN=EIF3A	2	10	10	10	3	4	7	9	10	6	3	4	7	9	10	6	3	4	7	9	10	6	6.8	6.8	6.8	166.57	1382	1382;1348	0	26.693	By MS/MS	By MS/MS	By MS/MS	By MS/MS	By MS/MS	By MS/MS	2	2.6	4.9	5.8	6.8	4.3
Q14157-4;Q14157-1;Q14157-3;Q14157;Q14157-5	Q14157-4;Q14157-1;Q14157-3;Q14157;Q14157-5	3;3;3;3;3	3;3;3;3;3	3;3;3;3;3	Ubiquitin-associated protein 2-like	UBAP2L	Isoform 4 of Ubiquitin-associated protein 2-like OS=Homo sapiens GN=UBAP2L;Isoform 2 of Ubiquitin-associated protein 2-like OS=Homo sapiens GN=UBAP2L;Isoform 3 of Ubiquitin-associated protein 2-like OS=Homo sapiens GN=UBAP2L;Ubiquitin-associated protein 2-	5	3	3	3	0	0	0	3	3	0	0	0	0	3	3	0	0	0	0	3	3	0	5.8	5.8	5.8	103.17	976	976;983;1068;1087;1104	0	22.851				By MS/MS	By MS/MS		0	0	0	5.8	5.8	0
Q14165	Q14165	1	1	1	Malectin	MLEC	Malectin OS=Homo sapiens GN=MLEC PE=1 SV=1	1	1	1	1	0	0	0	0	1	0	0	0	0	0	1	0	0	0	0	0	1	0	4.5	4.5	4.5	32.233	292	292	0.0014114	1.9821					By MS/MS		0	0	0	0	4.5	0
Q14166	Q14166	2	2	2	Tubulin--tyrosine ligase-like protein 12	TTLL12	Tubulin--tyrosine ligase-like protein 12 OS=Homo sapiens GN=TTLL12 PE=1 SV=2	1	2	2	2	0	0	0	2	2	0	0	0	0	2	2	0	0	0	0	2	2	0	3.3	3.3	3.3	74.403	644	644	0.0027229	1.7797				By MS/MS	By MS/MS		0	0	0	3.3	3.3	0
Q14185	Q14185	2	2	2	Dedicator of cytokinesis protein 1	DOCK1	Dedicator of cytokinesis protein 1 OS=Homo sapiens GN=DOCK1 PE=1 SV=2	1	2	2	2	0	1	0	2	2	0	0	1	0	2	2	0	0	1	0	2	2	0	1.7	1.7	1.7	215.34	1865	1865	0	9.3214		By MS/MS		By MS/MS	By MS/MS		0	1.1	0	1.7	1.7	0
Q14195-2;Q14195;Q16555-2;Q16555;Q14194;Q14194-2	Q14195-2;Q14195	3;2;1;1;1;1	3;2;1;1;1;1	3;2;1;1;1;1	Dihydropyrimidinase-related protein 3	DPYSL3	Isoform LCRMP-4 of Dihydropyrimidinase-related protein 3 OS=Homo sapiens GN=DPYSL3;Dihydropyrimidinase-related protein 3 OS=Homo sapiens GN=DPYSL3 PE=1 SV=1	6	3	3	3	0	1	0	2	3	0	0	1	0	2	3	0	0	1	0	2	3	0	5.3	5.3	5.3	73.91	684	684;570;536;572;572;686	0	5.7095		By matching		By MS/MS	By MS/MS		0	1.3	0	3.9	5.3	0
Q14202-2;Q14202	Q14202-2;Q14202	1;1	1;1	1;1	Zinc finger MYM-type protein 3	ZMYM3	Isoform 2 of Zinc finger MYM-type protein 3 OS=Homo sapiens GN=ZMYM3;Zinc finger MYM-type protein 3 OS=Homo sapiens GN=ZMYM3 PE=1 SV=2	2	1	1	1	1	1	1	1	1	1	1	1	1	1	1	1	1	1	1	1	1	1	1.3	1.3	1.3	151.08	1358	1358;1370	0	3.9481	By matching	By MS/MS	By MS/MS	By MS/MS	By MS/MS	By MS/MS	1.3	1.3	1.3	1.3	1.3	1.3
Q14204	Q14204	36	36	36	Cytoplasmic dynein 1 heavy chain 1	DYNC1H1	Cytoplasmic dynein 1 heavy chain 1 OS=Homo sapiens GN=DYNC1H1 PE=1 SV=5	1	36	36	36	2	5	10	30	34	6	2	5	10	30	34	6	2	5	10	30	34	6	8.8	8.8	8.8	532.4	4646	4646	0	147.16	By matching	By MS/MS	By MS/MS	By MS/MS	By MS/MS	By MS/MS	0.5	1.3	2.5	7.7	8.2	1.6
Q14207	Q14207	1	1	1	Protein NPAT	NPAT	Protein NPAT OS=Homo sapiens GN=NPAT PE=1 SV=3	1	1	1	1	0	1	1	0	0	1	0	1	1	0	0	1	0	1	1	0	0	1	0.8	0.8	0.8	154.29	1427	1427	0	2.7578		By MS/MS	By matching			By matching	0	0.8	0.8	0	0	0.8
Q14241	Q14241	14	14	14	Transcription elongation factor B polypeptide 3	TCEB3	Elongin-A OS=Homo sapiens GN=ELOA PE=1 SV=2	1	14	14	14	11	12	10	1	3	12	11	12	10	1	3	12	11	12	10	1	3	12	14.8	14.8	14.8	89.908	798	798	0	52.94	By MS/MS	By MS/MS	By MS/MS	By matching	By matching	By MS/MS	13.5	13.7	13.2	1.9	4.5	13.4
Q14247-3;Q14247;Q14247-2	Q14247-3;Q14247;Q14247-2	6;6;6	6;6;6	6;6;6	Src substrate cortactin	CTTN	Isoform 3 of Src substrate cortactin OS=Homo sapiens GN=CTTN;Src substrate cortactin OS=Homo sapiens GN=CTTN PE=1 SV=2;Isoform 2 of Src substrate cortactin OS=Homo sapiens GN=CTTN	3	6	6	6	4	4	4	4	6	3	4	4	4	4	6	3	4	4	4	4	6	3	13.5	13.5	13.5	57.466	513	513;550;634	0	21.63	By MS/MS	By MS/MS	By MS/MS	By MS/MS	By MS/MS	By MS/MS	8.2	8.2	8.2	8.4	13.5	6.2
Q14296-2;Q14296-4;Q14296-3;Q14296	Q14296-2;Q14296-4;Q14296-3;Q14296	1;1;1;1	1;1;1;1	1;1;1;1	Fas-activated serine/threonine kinase	FASTK	Isoform 2 of Fas-activated serine/threonine kinase OS=Homo sapiens GN=FASTK;Isoform 4 of Fas-activated serine/threonine kinase OS=Homo sapiens GN=FASTK;Isoform 3 of Fas-activated serine/threonine kinase OS=Homo sapiens GN=FASTK;Fas-activated serine/threoni	4	1	1	1	0	1	0	1	1	0	0	1	0	1	1	0	0	1	0	1	1	0	3.4	3.4	3.4	45.851	408	408;515;522;549	0	2.3863		By matching		By MS/MS	By MS/MS		0	3.4	0	3.4	3.4	0
Q14331	Q14331	2	2	2	Protein FRG1	FRG1	Protein FRG1 OS=Homo sapiens GN=FRG1 PE=1 SV=1	1	2	2	2	1	2	2	2	2	1	1	2	2	2	2	1	1	2	2	2	2	1	10.1	10.1	10.1	29.172	258	258	0	13.066	By MS/MS	By MS/MS	By MS/MS	By MS/MS	By MS/MS	By MS/MS	6.2	10.1	10.1	10.1	10.1	6.2
Q14498-3;Q14498-2;Q14498	Q14498-3;Q14498-2;Q14498	6;6;6	6;6;6	6;6;6	RNA-binding protein 39	RBM39	Isoform 3 of RNA-binding protein 39 OS=Homo sapiens GN=RBM39;Isoform 2 of RNA-binding protein 39 OS=Homo sapiens GN=RBM39;RNA-binding protein 39 OS=Homo sapiens GN=RBM39 PE=1 SV=2	3	6	6	6	5	5	5	1	1	5	5	5	5	1	1	5	5	5	5	1	1	5	14.4	14.4	14.4	57.089	508	508;524;530	0	98.323	By MS/MS	By MS/MS	By MS/MS	By MS/MS	By MS/MS	By MS/MS	12.2	12.2	11.4	2	2	11.4
Q14527-2;Q14527	Q14527-2;Q14527	2;2	2;2	2;2	Helicase-like transcription factor	HLTF	Isoform 2 of Helicase-like transcription factor OS=Homo sapiens GN=HLTF;Helicase-like transcription factor OS=Homo sapiens GN=HLTF PE=1 SV=2	2	2	2	2	0	0	0	2	2	0	0	0	0	2	2	0	0	0	0	2	2	0	3.2	3.2	3.2	99.918	887	887;1009	0	13.874				By MS/MS	By MS/MS		0	0	0	3.2	3.2	0
Q14562	Q14562	5	5	5	ATP-dependent RNA helicase DHX8	DHX8	ATP-dependent RNA helicase DHX8 OS=Homo sapiens GN=DHX8 PE=1 SV=1	1	5	5	5	4	3	2	0	0	2	4	3	2	0	0	2	4	3	2	0	0	2	4.3	4.3	4.3	139.31	1220	1220	0	13.973	By MS/MS	By MS/MS	By MS/MS			By MS/MS	3.9	3.1	2.3	0	0	1.6
Q14566	Q14566	2	2	2	DNA replication licensing factor MCM6	MCM6	DNA replication licensing factor MCM6 OS=Homo sapiens GN=MCM6 PE=1 SV=1	1	2	2	2	0	0	0	2	1	0	0	0	0	2	1	0	0	0	0	2	1	0	2.8	2.8	2.8	92.888	821	821	0	5.4841				By MS/MS	By MS/MS		0	0	0	2.8	1.2	0
Q14571	Q14571	2	2	2	Inositol 1,4,5-trisphosphate receptor type 2	ITPR2	Inositol 1,4,5-trisphosphate receptor type 2 OS=Homo sapiens GN=ITPR2 PE=1 SV=2	1	2	2	2	0	0	0	1	1	0	0	0	0	1	1	0	0	0	0	1	1	0	1.5	1.5	1.5	308.06	2701	2701	0	8.1616				By MS/MS	By MS/MS		0	0	0	0.6	0.9	0
Q14573	Q14573	9	9	9	Inositol 1,4,5-trisphosphate receptor type 3	ITPR3	Inositol 1,4,5-trisphosphate receptor type 3 OS=Homo sapiens GN=ITPR3 PE=1 SV=2	1	9	9	9	0	1	1	8	6	0	0	1	1	8	6	0	0	1	1	8	6	0	3.9	3.9	3.9	304.1	2671	2671	0	107.75		By matching	By matching	By MS/MS	By MS/MS		0	0.3	0.3	3.6	2.6	0
Q14643-4;Q14643-3;Q14643-8;Q14643-7;Q14643-5;Q14643-6;Q14643-2;Q14643	Q14643-4;Q14643-3;Q14643-8;Q14643-7;Q14643-5;Q14643-6;Q14643-2;Q14643	3;3;3;3;3;3;3;3	3;3;3;3;3;3;3;3	3;3;3;3;3;3;3;3	Inositol 1,4,5-trisphosphate receptor type 1	ITPR1	Isoform 4 of Inositol 1,4,5-trisphosphate receptor type 1 OS=Homo sapiens GN=ITPR1;Isoform 3 of Inositol 1,4,5-trisphosphate receptor type 1 OS=Homo sapiens GN=ITPR1;Isoform 8 of Inositol 1,4,5-trisphosphate receptor type 1 OS=Homo sapiens GN=ITPR1;Isoform	8	3	3	3	0	0	0	2	3	0	0	0	0	2	3	0	0	0	0	2	3	0	1.6	1.6	1.6	306.77	2695	2695;2710;2719;2728;2734;2743;2743;2758	0	98.045				By MS/MS	By MS/MS		0	0	0	1.1	1.6	0
Q14669-3;Q14669;Q14669-2;Q14669-4	Q14669-3;Q14669;Q14669-2	15;14;13;7	15;14;13;7	15;14;13;7	E3 ubiquitin-protein ligase TRIP12	TRIP12	Isoform 3 of E3 ubiquitin-protein ligase TRIP12 OS=Homo sapiens GN=TRIP12;E3 ubiquitin-protein ligase TRIP12 OS=Homo sapiens GN=TRIP12 PE=1 SV=1;Isoform 2 of E3 ubiquitin-protein ligase TRIP12 OS=Homo sapiens GN=TRIP12	4	15	15	15	13	13	12	9	9	13	13	13	12	9	9	13	13	13	12	9	9	13	10.1	10.1	10.1	225.52	2040	2040;1992;2025;1722	0	179.13	By MS/MS	By MS/MS	By MS/MS	By MS/MS	By MS/MS	By MS/MS	8.7	9	8.4	6.9	6.9	8.9
Q14676-3;Q14676-2;Q14676	Q14676-3;Q14676-2;Q14676	3;3;3	3;3;3	3;3;3	Mediator of DNA damage checkpoint protein 1	MDC1	Isoform 3 of Mediator of DNA damage checkpoint protein 1 OS=Homo sapiens GN=MDC1;Isoform 2 of Mediator of DNA damage checkpoint protein 1 OS=Homo sapiens GN=MDC1;Mediator of DNA damage checkpoint protein 1 OS=Homo sapiens GN=MDC1 PE=1 SV=3	3	3	3	3	1	2	2	0	1	3	1	2	2	0	1	3	1	2	2	0	1	3	3.2	3.2	3.2	195.98	1802	1802;1825;2089	0	7.9843	By MS/MS	By matching	By MS/MS		By matching	By MS/MS	0.6	1.8	1.8	0	0.6	3.2
Q14677;Q14677-2;Q14677-3	Q14677;Q14677-2;Q14677-3	1;1;1	1;1;1	1;1;1	Clathrin interactor 1	CLINT1	Clathrin interactor 1 OS=Homo sapiens GN=CLINT1 PE=1 SV=1;Isoform 2 of Clathrin interactor 1 OS=Homo sapiens GN=CLINT1;Isoform 3 of Clathrin interactor 1 OS=Homo sapiens GN=CLINT1	3	1	1	1	0	0	0	1	1	0	0	0	0	1	1	0	0	0	0	1	1	0	2.7	2.7	2.7	68.259	625	625;625;643	0.0014124	1.9838				By matching	By MS/MS		0	0	0	2.7	2.7	0
Q14683	Q14683	1	1	1	Structural maintenance of chromosomes protein 1A	SMC1A	Structural maintenance of chromosomes protein 1A OS=Homo sapiens GN=SMC1A PE=1 SV=2	1	1	1	1	0	0	0	1	1	1	0	0	0	1	1	1	0	0	0	1	1	1	0.8	0.8	0.8	143.23	1233	1233	0.0078278	1.5289				By MS/MS	By MS/MS	By MS/MS	0	0	0	0.8	0.8	0.8
Q14684-2;Q14684	Q14684-2;Q14684	7;7	7;7	7;7	Ribosomal RNA processing protein 1 homolog B	RRP1B	Isoform 2 of Ribosomal RNA processing protein 1 homolog B OS=Homo sapiens GN=RRP1B;Ribosomal RNA processing protein 1 homolog B OS=Homo sapiens GN=RRP1B PE=1 SV=3	2	7	7	7	4	4	4	5	5	4	4	4	4	5	5	4	4	4	4	5	5	4	12.3	12.3	12.3	82.175	740	740;758	0	125.03	By MS/MS	By MS/MS	By MS/MS	By MS/MS	By MS/MS	By MS/MS	7.6	8.1	8.1	10.8	10.8	8.1
Q14690	Q14690	18	18	18	Protein RRP5 homolog	PDCD11	Protein RRP5 homolog OS=Homo sapiens GN=PDCD11 PE=1 SV=3	1	18	18	18	1	3	6	14	17	6	1	3	6	14	17	6	1	3	6	14	17	6	9.6	9.6	9.6	208.7	1871	1871	0	124.16	By MS/MS	By MS/MS	By MS/MS	By MS/MS	By MS/MS	By MS/MS	0.5	1.7	3.5	8.4	9	3.7
Q14692	Q14692	7	7	7	Ribosome biogenesis protein BMS1 homolog	BMS1	Ribosome biogenesis protein BMS1 homolog OS=Homo sapiens GN=BMS1 PE=1 SV=1	1	7	7	7	0	2	2	5	6	3	0	2	2	5	6	3	0	2	2	5	6	3	6.5	6.5	6.5	145.81	1282	1282	0	18.794		By MS/MS	By MS/MS	By MS/MS	By MS/MS	By MS/MS	0	1.6	2	4.7	5.4	3.1
Q14696;Q14696-2	Q14696	7;1	7;1	7;1	LDLR chaperone MESD	MESDC2	LRP chaperone MESD OS=Homo sapiens GN=MESD PE=1 SV=2	2	7	7	7	5	6	5	0	0	6	5	6	5	0	0	6	5	6	5	0	0	6	29.9	29.9	29.9	26.076	234	234;138	0	38.59	By MS/MS	By MS/MS	By MS/MS			By MS/MS	23.1	27.8	23.1	0	0	25.2
Q14739	Q14739	4	4	4	Lamin-B receptor	LBR	Lamin-B receptor OS=Homo sapiens GN=LBR PE=1 SV=2	1	4	4	4	1	2	2	4	3	1	1	2	2	4	3	1	1	2	2	4	3	1	6.2	6.2	6.2	70.702	615	615	0	6.6866	By MS/MS	By MS/MS	By MS/MS	By MS/MS	By MS/MS	By MS/MS	1.3	2.6	3.1	6.2	4.4	1.3
Q14807-2;Q14807	Q14807-2;Q14807	2;2	2;2	2;2	Kinesin-like protein KIF22	KIF22	Isoform 2 of Kinesin-like protein KIF22 OS=Homo sapiens GN=KIF22;Kinesin-like protein KIF22 OS=Homo sapiens GN=KIF22 PE=1 SV=5	2	2	2	2	0	0	0	1	2	0	0	0	0	1	2	0	0	0	0	1	2	0	5.9	5.9	5.9	66.306	597	597;665	0	4.8496				By MS/MS	By MS/MS		0	0	0	1.8	5.9	0
Q14839;Q14839-2;Q8TDI0	Q14839;Q14839-2	20;20;2	20;20;2	20;20;2	Chromodomain-helicase-DNA-binding protein 4	CHD4	Chromodomain-helicase-DNA-binding protein 4 OS=Homo sapiens GN=CHD4 PE=1 SV=2;Isoform 2 of Chromodomain-helicase-DNA-binding protein 4 OS=Homo sapiens GN=CHD4	3	20	20	20	8	12	13	13	11	8	8	12	13	13	11	8	8	12	13	13	11	8	11.7	11.7	11.7	218	1912	1912;1940;1954	0	255.92	By MS/MS	By MS/MS	By MS/MS	By MS/MS	By MS/MS	By MS/MS	4.1	7.4	7.6	8.2	7.3	5.5
Q14966-3;Q14966;Q14966-4;Q14966-2;Q14966-5	Q14966-3;Q14966;Q14966-4;Q14966-2	8;8;7;6;1	8;8;7;6;1	8;8;7;6;1	Zinc finger protein 638	ZNF638	Isoform 3 of Zinc finger protein 638 OS=Homo sapiens GN=ZNF638;Zinc finger protein 638 OS=Homo sapiens GN=ZNF638 PE=1 SV=2;Isoform 4 of Zinc finger protein 638 OS=Homo sapiens GN=ZNF638;Isoform 2 of Zinc finger protein 638 OS=Homo sapiens GN=ZNF638	5	8	8	8	3	5	7	6	6	6	3	5	7	6	6	6	3	5	7	6	6	6	4.6	4.6	4.6	218.24	1957	1957;1978;1139;814;1075	0	34.387	By MS/MS	By MS/MS	By MS/MS	By MS/MS	By MS/MS	By MS/MS	1.5	3	3.7	3.9	3.9	3.1
Q14978;Q14978-3;Q14978-2	Q14978;Q14978-3;Q14978-2	22;22;22	22;22;22	22;22;22	Nucleolar and coiled-body phosphoprotein 1	NOLC1	Nucleolar and coiled-body phosphoprotein 1 OS=Homo sapiens GN=NOLC1 PE=1 SV=2;Isoform 3 of Nucleolar and coiled-body phosphoprotein 1 OS=Homo sapiens GN=NOLC1;Isoform Beta of Nucleolar and coiled-body phosphoprotein 1 OS=Homo sapiens GN=NOLC1	3	22	22	22	15	16	19	16	16	19	15	16	19	16	16	19	15	16	19	16	16	19	22.2	22.2	22.2	73.602	699	699;700;709	0	71.899	By MS/MS	By MS/MS	By MS/MS	By MS/MS	By MS/MS	By MS/MS	18.3	20.3	20.5	16.9	18.9	19.6
Q14980;Q14980-2;Q14980-4;Q14980-3;Q14980-5	Q14980;Q14980-2;Q14980-4;Q14980-3	29;28;25;25;12	29;28;25;25;12	29;28;25;25;12	Nuclear mitotic apparatus protein 1	NUMA1	Nuclear mitotic apparatus protein 1 OS=Homo sapiens GN=NUMA1 PE=1 SV=2;Isoform 2 of Nuclear mitotic apparatus protein 1 OS=Homo sapiens GN=NUMA1;Isoform 4 of Nuclear mitotic apparatus protein 1 OS=Homo sapiens GN=NUMA1;Isoform 3 of Nuclear mitotic apparatu	5	29	29	29	4	2	5	29	29	1	4	2	5	29	29	1	4	2	5	29	29	1	16.3	16.3	16.3	238.26	2115	2115;2101;1763;1776;979	0	323.31	By MS/MS	By MS/MS	By MS/MS	By MS/MS	By MS/MS	By MS/MS	2.8	1.6	3.3	16.3	16.3	0.7
Q14C86-3;Q14C86-4;Q14C86-5;Q14C86-2;Q14C86;Q14C86-6	Q14C86-3;Q14C86-4;Q14C86-5;Q14C86-2;Q14C86;Q14C86-6	2;2;2;2;2;2	2;2;2;2;2;2	2;2;2;2;2;2	GTPase-activating protein and VPS9 domain-containing protein 1	GAPVD1	Isoform 3 of GTPase-activating protein and VPS9 domain-containing protein 1 OS=Homo sapiens GN=GAPVD1;Isoform 4 of GTPase-activating protein and VPS9 domain-containing protein 1 OS=Homo sapiens GN=GAPVD1;Isoform 5 of GTPase-activating protein and VPS9 doma	6	2	2	2	0	0	0	2	1	0	0	0	0	2	1	0	0	0	0	2	1	0	2.2	2.2	2.2	159.75	1433	1433;1439;1452;1460;1478;1487	0	67.993				By MS/MS	By MS/MS		0	0	0	2.2	1.4	0
Q15005	Q15005	2	2	2	Signal peptidase complex subunit 2	SPCS2	Signal peptidase complex subunit 2 OS=Homo sapiens GN=SPCS2 PE=1 SV=3	1	2	2	2	0	0	0	2	2	0	0	0	0	2	2	0	0	0	0	2	2	0	13.7	13.7	13.7	25.003	226	226	0	46.941				By MS/MS	By MS/MS		0	0	0	13.7	13.7	0
Q15008;Q15008-3;Q15008-2;Q15008-4	Q15008;Q15008-3;Q15008-2;Q15008-4	2;1;1;1	2;1;1;1	2;1;1;1	26S proteasome non-ATPase regulatory subunit 6	PSMD6	26S proteasome non-ATPase regulatory subunit 6 OS=Homo sapiens GN=PSMD6 PE=1 SV=1;Isoform 3 of 26S proteasome non-ATPase regulatory subunit 6 OS=Homo sapiens GN=PSMD6;Isoform 2 of 26S proteasome non-ATPase regulatory subunit 6 OS=Homo sapiens GN=PSMD6;Isof	4	2	2	2	0	0	0	2	2	0	0	0	0	2	2	0	0	0	0	2	2	0	5.7	5.7	5.7	45.531	389	389;350;351;442	0	5.8642				By MS/MS	By MS/MS		0	0	0	5.7	5.7	0
Q15014	Q15014	2	2	2	Mortality factor 4-like protein 2	MORF4L2	Mortality factor 4-like protein 2 OS=Homo sapiens GN=MORF4L2 PE=1 SV=1	1	2	2	2	0	2	1	1	1	2	0	2	1	1	1	2	0	2	1	1	1	2	10.1	10.1	10.1	32.307	288	288	0.00074571	2.2874		By MS/MS	By MS/MS	By matching	By matching	By MS/MS	0	10.1	3.8	3.8	3.8	10.1
Q15020-3;Q15020-2;Q15020-4;Q15020	Q15020-3;Q15020-2;Q15020-4;Q15020	2;2;2;2	2;2;2;2	2;2;2;2	Squamous cell carcinoma antigen recognized by T-cells 3	SART3	Isoform 3 of Squamous cell carcinoma antigen recognized by T-cells 3 OS=Homo sapiens GN=SART3;Isoform 2 of Squamous cell carcinoma antigen recognized by T-cells 3 OS=Homo sapiens GN=SART3;Isoform 4 of Squamous cell carcinoma antigen recognized by T-cells 3	4	2	2	2	0	0	0	2	1	0	0	0	0	2	1	0	0	0	0	2	1	0	22.5	22.5	22.5	13.773	129	129;364;927;963	0	54.005				By MS/MS	By MS/MS		0	0	0	22.5	12.4	0
Q15021	Q15021	4	4	4	Condensin complex subunit 1	NCAPD2	Condensin complex subunit 1 OS=Homo sapiens GN=NCAPD2 PE=1 SV=3	1	4	4	4	0	1	1	4	4	2	0	1	1	4	4	2	0	1	1	4	4	2	3.9	3.9	3.9	157.18	1401	1401	0	21.365		By matching	By matching	By MS/MS	By MS/MS	By MS/MS	0	0.9	0.9	3.9	3.9	2.2
Q15022	Q15022	2	2	2	Polycomb protein SUZ12	SUZ12	Polycomb protein SUZ12 OS=Homo sapiens GN=SUZ12 PE=1 SV=3	1	2	2	2	0	0	0	2	2	0	0	0	0	2	2	0	0	0	0	2	2	0	1.9	1.9	1.9	83.054	739	739	0	13.238				By MS/MS	By MS/MS		0	0	0	1.9	1.9	0
Q15046	Q15046	1	1	1	Lysine--tRNA ligase	KARS	Lysine--tRNA ligase OS=Homo sapiens GN=KARS PE=1 SV=3	1	1	1	1	1	1	1	1	1	1	1	1	1	1	1	1	1	1	1	1	1	1	2.7	2.7	2.7	68.047	597	597	0	4.8919	By matching	By MS/MS	By MS/MS	By MS/MS	By MS/MS	By matching	2.7	2.7	2.7	2.7	2.7	2.7
Q15050	Q15050	2	2	2	Ribosome biogenesis regulatory protein homolog	RRS1	Ribosome biogenesis regulatory protein homolog OS=Homo sapiens GN=RRS1 PE=1 SV=2	1	2	2	2	0	2	2	1	1	2	0	2	2	1	1	2	0	2	2	1	1	2	6.3	6.3	6.3	41.193	365	365	0	34.183		By MS/MS	By MS/MS	By MS/MS	By MS/MS	By MS/MS	0	6.3	6.3	3.3	3.3	6.3
Q15054-3;Q15054-2;Q15054	Q15054-3;Q15054-2;Q15054	3;3;3	3;3;3	3;3;3	DNA polymerase delta subunit 3	POLD3	Isoform 3 of DNA polymerase delta subunit 3 OS=Homo sapiens GN=POLD3;Isoform 2 of DNA polymerase delta subunit 3 OS=Homo sapiens GN=POLD3;DNA polymerase delta subunit 3 OS=Homo sapiens GN=POLD3 PE=1 SV=2	3	3	3	3	1	2	3	1	1	2	1	2	3	1	1	2	1	2	3	1	1	2	11.4	11.4	11.4	39.32	360	360;427;466	0	15.754	By MS/MS	By MS/MS	By MS/MS	By matching	By matching	By MS/MS	3.6	7.8	11.4	4.2	4.2	7.8
Q15059;Q15059-2	Q15059;Q15059-2	11;10	9;8	9;8	Bromodomain-containing protein 3	BRD3	Bromodomain-containing protein 3 OS=Homo sapiens GN=BRD3 PE=1 SV=1;Isoform 2 of Bromodomain-containing protein 3 OS=Homo sapiens GN=BRD3	2	11	9	9	7	8	8	0	1	9	6	7	7	0	0	7	6	7	7	0	0	7	20.4	17.4	17.4	79.541	726	726;556	0	37.923	By MS/MS	By MS/MS	By MS/MS		By matching	By MS/MS	13.9	11.2	15.7	0	1.2	15.8
Q15075	Q15075	2	2	2	Early endosome antigen 1	EEA1	Early endosome antigen 1 OS=Homo sapiens GN=EEA1 PE=1 SV=2	1	2	2	2	0	0	2	0	0	1	0	0	2	0	0	1	0	0	2	0	0	1	1.4	1.4	1.4	162.46	1411	1411	0.0047075	1.6853			By MS/MS			By MS/MS	0	0	1.4	0	0	0.7
Q15120;Q15120-2	Q15120;Q15120-2	1;1	1;1	1;1	[Pyruvate dehydrogenase (acetyl-transferring)] kinase isozyme 3, mitochondrial	PDK3	[Pyruvate dehydrogenase (acetyl-transferring)] kinase isozyme 3, mitochondrial OS=Homo sapiens GN=PDK3 PE=1 SV=1;Isoform 2 of [Pyruvate dehydrogenase (acetyl-transferring)] kinase isozyme 3, mitochondrial OS=Homo sapiens GN=PDK3	2	1	1	1	0	0	0	1	1	0	0	0	0	1	1	0	0	0	0	1	1	0	3.9	3.9	3.9	46.938	406	406;415	0.0014045	1.9587				By MS/MS	By MS/MS		0	0	0	3.9	3.9	0
Q15126	Q15126	1	1	1	Phosphomevalonate kinase	PMVK	Phosphomevalonate kinase OS=Homo sapiens GN=PMVK PE=1 SV=3	1	1	1	1	0	0	0	1	1	0	0	0	0	1	1	0	0	0	0	1	1	0	5.7	5.7	5.7	21.995	192	192	0.004645	1.656				By matching	By MS/MS		0	0	0	5.7	5.7	0
Q15149-7;Q15149-8;Q15149-9;Q15149-5;Q15149-4;Q15149-6;Q15149-3;Q15149-2;Q15149	Q15149-7;Q15149-8;Q15149-9;Q15149-5;Q15149-4;Q15149-6;Q15149-3;Q15149-2;Q15149	19;19;19;19;19;19;19;19;19	19;19;19;19;19;19;19;19;19	19;19;19;19;19;19;19;19;19	Plectin	PLEC	Isoform 7 of Plectin OS=Homo sapiens GN=PLEC;Isoform 8 of Plectin OS=Homo sapiens GN=PLEC;Isoform 9 of Plectin OS=Homo sapiens GN=PLEC;Isoform 5 of Plectin OS=Homo sapiens GN=PLEC;Isoform 4 of Plectin OS=Homo sapiens GN=PLEC;Isoform 6 of Plectin OS=Homo sa	9	19	19	19	2	0	3	19	16	2	2	0	3	19	16	2	2	0	3	19	16	2	5	5	5	512.6	4515	4515;4525;4533;4547;4547;4551;4570;4574;4684	0	106.86	By matching		By matching	By MS/MS	By MS/MS	By matching	0.4	0	0.7	5	4.3	0.5
Q15233-2;Q15233	Q15233-2;Q15233	3;3	3;3	3;3	Non-POU domain-containing octamer-binding protein	NONO	Isoform 2 of Non-POU domain-containing octamer-binding protein OS=Homo sapiens GN=NONO;Non-POU domain-containing octamer-binding protein OS=Homo sapiens GN=NONO PE=1 SV=4	2	3	3	3	1	1	1	3	3	0	1	1	1	3	3	0	1	1	1	3	3	0	9.7	9.7	9.7	43.866	382	382;471	0	52.198	By matching	By matching	By MS/MS	By MS/MS	By MS/MS		2.9	2.9	2.9	9.7	9.7	0
Q15283-2;Q15283	Q15283-2;Q15283	1;1	1;1	1;1	Ras GTPase-activating protein 2	RASA2	Isoform 2 of Ras GTPase-activating protein 2 OS=Homo sapiens GN=RASA2;Ras GTPase-activating protein 2 OS=Homo sapiens GN=RASA2 PE=1 SV=3	2	1	1	1	0	0	0	1	1	0	0	0	0	1	1	0	0	0	0	1	1	0	3.7	3.7	3.7	96.526	849	849;850	0	23.92				By MS/MS	By MS/MS		0	0	0	3.7	3.7	0
Q15287;Q15287-3;Q15287-2	Q15287;Q15287-3;Q15287-2	5;3;3	5;3;3	5;3;3	RNA-binding protein with serine-rich domain 1	RNPS1	RNA-binding protein with serine-rich domain 1 OS=Homo sapiens GN=RNPS1 PE=1 SV=1;Isoform 3 of RNA-binding protein with serine-rich domain 1 OS=Homo sapiens GN=RNPS1;Isoform 2 of RNA-binding protein with serine-rich domain 1 OS=Homo sapiens GN=RNPS1	3	5	5	5	2	4	3	1	2	3	2	4	3	1	2	3	2	4	3	1	2	3	11.1	11.1	11.1	34.208	305	305;268;282	0	18.833	By MS/MS	By MS/MS	By MS/MS	By MS/MS	By MS/MS	By MS/MS	7.5	10.2	10.2	2.3	2.6	8.5
Q15311	Q15311	2	2	2	RalA-binding protein 1	RALBP1	RalA-binding protein 1 OS=Homo sapiens GN=RALBP1 PE=1 SV=3	1	2	2	2	0	2	2	0	0	1	0	2	2	0	0	1	0	2	2	0	0	1	4.1	4.1	4.1	76.063	655	655	0	2.6976		By MS/MS	By MS/MS			By MS/MS	0	4.1	4.1	0	0	1.8
Q15345-3;Q15345	Q15345-3;Q15345	3;3	3;3	3;3	Leucine-rich repeat-containing protein 41	LRRC41	Isoform 3 of Leucine-rich repeat-containing protein 41 OS=Homo sapiens GN=LRRC41;Leucine-rich repeat-containing protein 41 OS=Homo sapiens GN=LRRC41 PE=1 SV=3	2	3	3	3	0	0	0	2	3	0	0	0	0	2	3	0	0	0	0	2	3	0	4.8	4.8	4.8	79.297	729	729;812	0	50.533				By MS/MS	By MS/MS		0	0	0	4.7	4.8	0
Q15361	Q15361	8	8	8	Transcription termination factor 1	TTF1	Transcription termination factor 1 OS=Homo sapiens GN=TTF1 PE=1 SV=3	1	8	8	8	4	4	3	6	6	4	4	4	3	6	6	4	4	4	3	6	6	4	11.3	11.3	11.3	103.05	905	905	0	60.401	By MS/MS	By MS/MS	By MS/MS	By MS/MS	By MS/MS	By MS/MS	5.2	4.2	2.8	7	8.1	6
Q15365;Q15366-7;Q15366-8;Q15366-4;Q15366-5;P57721-2;P57721-3;P57721-5;Q15366-6;Q15366-3;Q15366;Q15366-2;P57721-4;P57721	Q15365;Q15366-7;Q15366-8;Q15366-4;Q15366-5;P57721-2;P57721-3;P57721-5;Q15366-6;Q15366-3;Q15366;Q15366-2;P57721-4;P57721	4;2;2;2;2;2;2;2;2;2;2;2;2;2	4;2;2;2;2;2;2;2;2;2;2;2;2;2	4;2;2;2;2;2;2;2;2;2;2;2;2;2	Poly(rC)-binding protein 1;Poly(rC)-binding protein 2;Poly(rC)-binding protein 3	PCBP1;PCBP2;PCBP3	Poly(rC)-binding protein 1 OS=Homo sapiens GN=PCBP1 PE=1 SV=2;Isoform 7 of Poly(rC)-binding protein 2 OS=Homo sapiens GN=PCBP2;Isoform 8 of Poly(rC)-binding protein 2 OS=Homo sapiens GN=PCBP2;Isoform 4 of Poly(rC)-binding protein 2 OS=Homo sapiens GN=PCBP2	14	4	4	4	0	1	1	4	4	0	0	1	1	4	4	0	0	1	1	4	4	0	17.1	17.1	17.1	37.497	356	356;318;322;331;335;345;346;351;361;362;365;366;370;371	0	31.466		By MS/MS	By MS/MS	By MS/MS	By MS/MS		0	3.9	3.1	17.1	17.1	0
Q15417-3;Q15417-2;Q15417	Q15417-3;Q15417-2;Q15417	1;1;1	1;1;1	1;1;1	Calponin-3	CNN3	Isoform 3 of Calponin-3 OS=Homo sapiens GN=CNN3;Isoform 2 of Calponin-3 OS=Homo sapiens GN=CNN3;Calponin-3 OS=Homo sapiens GN=CNN3 PE=1 SV=1	3	1	1	1	0	0	0	1	0	0	0	0	0	1	0	0	0	0	0	1	0	0	4.9	4.9	4.9	31.38	283	283;288;329	0.0020647	1.8235				By MS/MS			0	0	0	4.9	0	0
Q15424-2;Q15424;Q15424-4;Q15424-3	Q15424-2;Q15424;Q15424-4;Q15424-3	12;12;12;12	12;12;12;12	9;9;9;9	Scaffold attachment factor B1	SAFB	Isoform 2 of Scaffold attachment factor B1 OS=Homo sapiens GN=SAFB;Scaffold attachment factor B1 OS=Homo sapiens GN=SAFB PE=1 SV=4;Isoform 4 of Scaffold attachment factor B1 OS=Homo sapiens GN=SAFB;Isoform 3 of Scaffold attachment factor B1 OS=Homo sapiens	4	12	12	9	7	6	9	6	3	7	7	6	9	6	3	7	6	6	7	5	3	6	15.3	15.3	12.9	95.18	848	848;915;916;917	0	135.26	By MS/MS	By MS/MS	By MS/MS	By MS/MS	By MS/MS	By MS/MS	10.8	9.6	13.4	9	5	9.2
Q15436;Q15436-2	Q15436;Q15436-2	2;1	2;1	2;1	Protein transport protein Sec23A	SEC23A	Protein transport protein Sec23A OS=Homo sapiens GN=SEC23A PE=1 SV=2;Isoform 2 of Protein transport protein Sec23A OS=Homo sapiens GN=SEC23A	2	2	2	2	0	0	0	2	2	1	0	0	0	2	2	1	0	0	0	2	2	1	2.9	2.9	2.9	86.16	765	765;563	0	2.9119				By MS/MS	By MS/MS	By matching	0	0	0	2.9	2.9	1.6
Q15477	Q15477	2	2	2	Helicase SKI2W	SKIV2L	Helicase SKI2W OS=Homo sapiens GN=SKIV2L PE=1 SV=3	1	2	2	2	0	0	0	2	0	0	0	0	0	2	0	0	0	0	0	2	0	0	2	2	2	137.75	1246	1246	0	3.8075				By MS/MS			0	0	0	2	0	0
Q15637-4;Q15637-6;Q15637-3;Q15637-2;Q15637;Q15637-7;Q15637-5	Q15637-4;Q15637-6;Q15637-3;Q15637-2;Q15637	3;3;3;3;3;1;1	3;3;3;3;3;1;1	3;3;3;3;3;1;1	Splicing factor 1	SF1	Isoform 4 of Splicing factor 1 OS=Homo sapiens GN=SF1;Isoform 6 of Splicing factor 1 OS=Homo sapiens GN=SF1;Isoform 3 of Splicing factor 1 OS=Homo sapiens GN=SF1;Isoform 2 of Splicing factor 1 OS=Homo sapiens GN=SF1;Splicing factor 1 OS=Homo sapiens GN=SF1	7	3	3	3	1	1	1	2	1	1	1	1	1	2	1	1	1	1	1	2	1	1	4.6	4.6	4.6	59.711	548	548;571;623;638;639;613;673	0	5.9986	By matching	By matching	By MS/MS	By MS/MS	By MS/MS	By matching	1.8	1.8	2.6	4.6	1.8	1.8
Q15645-2;Q15645	Q15645-2;Q15645	1;1	1;1	1;1	Pachytene checkpoint protein 2 homolog	TRIP13	Isoform 2 of Pachytene checkpoint protein 2 homolog OS=Homo sapiens GN=TRIP13;Pachytene checkpoint protein 2 homolog OS=Homo sapiens GN=TRIP13 PE=1 SV=2	2	1	1	1	0	0	0	0	1	0	0	0	0	0	1	0	0	0	0	0	1	0	4.6	4.6	4.6	22.084	196	196;432	0.008344	1.4329					By MS/MS		0	0	0	0	4.6	0
Q15648	Q15648	6	6	6	Mediator of RNA polymerase II transcription subunit 1	MED1	Mediator of RNA polymerase II transcription subunit 1 OS=Homo sapiens GN=MED1 PE=1 SV=4	1	6	6	6	2	4	4	2	3	6	2	4	4	2	3	6	2	4	4	2	3	6	5.6	5.6	5.6	168.48	1581	1581	0	51.259	By MS/MS	By MS/MS	By MS/MS	By MS/MS	By MS/MS	By MS/MS	1.7	3.7	3.7	2	2.6	5.6
Q15651	Q15651	4	2	2	High mobility group nucleosome-binding domain-containing protein 3	HMGN3	High mobility group nucleosome-binding domain-containing protein 3 OS=Homo sapiens GN=HMGN3 PE=1 SV=2	1	4	2	2	4	4	4	0	0	3	2	2	2	0	0	1	2	2	2	0	0	1	40.4	27.3	27.3	10.666	99	99	0	32.409	By MS/MS	By MS/MS	By MS/MS			By MS/MS	40.4	40.4	40.4	0	0	28.3
Q15678	Q15678	4	4	4	Tyrosine-protein phosphatase non-receptor type 14	PTPN14	Tyrosine-protein phosphatase non-receptor type 14 OS=Homo sapiens GN=PTPN14 PE=1 SV=2	1	4	4	4	0	0	1	4	4	0	0	0	1	4	4	0	0	0	1	4	4	0	3.8	3.8	3.8	135.26	1187	1187	0	6.5734			By matching	By MS/MS	By MS/MS		0	0	1.1	3.8	3.8	0
Q15695;Q15696	Q15695;Q15696	1;1	1;1	1;1	U2 small nuclear ribonucleoprotein auxiliary factor 35 kDa subunit-related protein 1;U2 small nuclear ribonucleoprotein auxiliary factor 35 kDa subunit-related protein 2	ZRSR1;ZRSR2	U2 small nuclear ribonucleoprotein auxiliary factor 35 kDa subunit-related protein 1 OS=Homo sapiens GN=ZRSR1 PE=2 SV=2;U2 small nuclear ribonucleoprotein auxiliary factor 35 kDa subunit-related protein 2 OS=Homo sapiens GN=ZRSR2 PE=1 SV=2	2	1	1	1	0	1	1	0	0	1	0	1	1	0	0	1	0	1	1	0	0	1	2.3	2.3	2.3	57.643	479	479;482	0.0014347	2.0762		By MS/MS	By matching			By MS/MS	0	2.3	2.3	0	0	2.3
Q15717;Q15717-2	Q15717;Q15717-2	3;2	3;2	3;2	ELAV-like protein 1	ELAVL1	ELAV-like protein 1 OS=Homo sapiens GN=ELAVL1 PE=1 SV=2;Isoform 2 of ELAV-like protein 1 OS=Homo sapiens GN=ELAVL1	2	3	3	3	0	0	0	1	3	0	0	0	0	1	3	0	0	0	0	1	3	0	11.7	11.7	11.7	36.091	326	326;353	0	7.8819				By MS/MS	By MS/MS		0	0	0	3.4	11.7	0
Q15746-4;Q15746-5;Q15746-2;Q15746-3;Q15746-6;Q15746	Q15746-4;Q15746-5;Q15746-2;Q15746-3;Q15746-6;Q15746	2;2;2;2;2;2	2;2;2;2;2;2	2;2;2;2;2;2	Myosin light chain kinase, smooth muscle;Myosin light chain kinase, smooth muscle, deglutamylated form	MYLK	Isoform 3B of Myosin light chain kinase, smooth muscle OS=Homo sapiens GN=MYLK;Isoform 4 of Myosin light chain kinase, smooth muscle OS=Homo sapiens GN=MYLK;Isoform 2 of Myosin light chain kinase, smooth muscle OS=Homo sapiens GN=MYLK;Isoform 3A of Myosin	6	2	2	2	1	1	1	2	2	1	1	1	1	2	2	1	1	1	1	2	2	1	1.4	1.4	1.4	197.4	1794	1794;1841;1845;1863;1913;1914	0.00072886	2.1588	By matching	By MS/MS	By matching	By MS/MS	By MS/MS	By matching	0.7	0.7	0.7	1.4	1.4	0.7
Q15758-3;Q15758-2;Q15758	Q15758-3;Q15758-2;Q15758	1;1;1	1;1;1	1;1;1	Neutral amino acid transporter B(0)	SLC1A5	Isoform 3 of Neutral amino acid transporter B(0) OS=Homo sapiens GN=SLC1A5;Isoform 2 of Neutral amino acid transporter B(0) OS=Homo sapiens GN=SLC1A5;Neutral amino acid transporter B(0) OS=Homo sapiens GN=SLC1A5 PE=1 SV=2	3	1	1	1	1	0	1	0	0	1	1	0	1	0	0	1	1	0	1	0	0	1	3.2	3.2	3.2	33.709	313	313;339;541	0.0046358	1.645	By matching		By MS/MS			By matching	3.2	0	3.2	0	0	3.2
Q15836;P63027	Q15836;P63027	2;1	2;1	2;1	Vesicle-associated membrane protein 3;Vesicle-associated membrane protein 2	VAMP3;VAMP2	Vesicle-associated membrane protein 3 OS=Homo sapiens GN=VAMP3 PE=1 SV=3;Vesicle-associated membrane protein 2 OS=Homo sapiens GN=VAMP2 PE=1 SV=3	2	2	2	2	0	0	0	2	2	0	0	0	0	2	2	0	0	0	0	2	2	0	30	30	30	11.309	100	100;116	0	14.387				By MS/MS	By MS/MS		0	0	0	30	30	0
Q15942-2;Q15942	Q15942-2;Q15942	2;2	2;2	2;2	Zyxin	ZYX	Isoform 2 of Zyxin OS=Homo sapiens GN=ZYX;Zyxin OS=Homo sapiens GN=ZYX PE=1 SV=1	2	2	2	2	0	0	0	1	2	0	0	0	0	1	2	0	0	0	0	1	2	0	6.3	6.3	6.3	45.075	415	415;572	0	8.7848				By matching	By MS/MS		0	0	0	3.6	6.3	0
Q16181-2;Q16181	Q16181-2;Q16181	1;1	1;1	1;1	Septin-7	2023-09-07	Isoform 2 of Septin-7 OS=Homo sapiens GN=SEPT7;Septin-7 OS=Homo sapiens GN=SEPT7 PE=1 SV=2	2	1	1	1	0	0	0	0	1	0	0	0	0	0	1	0	0	0	0	0	1	0	3	3	3	50.58	436	436;437	0	3.9252					By MS/MS		0	0	0	0	3	0
Q16186	Q16186	1	1	1	Proteasomal ubiquitin receptor ADRM1	ADRM1	Proteasomal ubiquitin receptor ADRM1 OS=Homo sapiens GN=ADRM1 PE=1 SV=2	1	1	1	1	1	0	0	1	1	0	1	0	0	1	1	0	1	0	0	1	1	0	3.9	3.9	3.9	42.153	407	407	0	2.8543	By matching			By MS/MS	By MS/MS		3.9	0	0	3.9	3.9	0
Q16270-2;Q16270	Q16270-2;Q16270	3;3	3;3	3;3	Insulin-like growth factor-binding protein 7	IGFBP7	Isoform 2 of Insulin-like growth factor-binding protein 7 OS=Homo sapiens GN=IGFBP7;Insulin-like growth factor-binding protein 7 OS=Homo sapiens GN=IGFBP7 PE=1 SV=1	2	3	3	3	1	1	3	0	0	2	1	1	3	0	0	2	1	1	3	0	0	2	15.1	15.1	15.1	28.86	279	279;282	0	6.9106	By matching	By matching	By MS/MS			By MS/MS	6.1	6.1	15.1	0	0	9
Q16384	Q16384	1	1	1	Protein SSX1	SSX1	Protein SSX1 OS=Homo sapiens GN=SSX1 PE=1 SV=2	1	1	1	1	0	0	0	1	1	0	0	0	0	1	1	0	0	0	0	1	1	0	12.2	12.2	12.2	21.931	188	188	0	3.2955				By MS/MS	By MS/MS		0	0	0	12.2	12.2	0
Q16527	Q16527	2	2	2	Cysteine and glycine-rich protein 2	CSRP2	Cysteine and glycine-rich protein 2 OS=Homo sapiens GN=CSRP2 PE=1 SV=3	1	2	2	2	2	2	1	0	0	2	2	2	1	0	0	2	2	2	1	0	0	2	10.4	10.4	10.4	20.954	193	193	0	3.6717	By MS/MS	By MS/MS	By matching			By matching	10.4	10.4	5.2	0	0	10.4
Q16537-2;Q16537	Q16537-2;Q16537	1;1	1;1	1;1	Serine/threonine-protein phosphatase 2A 56 kDa regulatory subunit epsilon isoform	PPP2R5E	Isoform 2 of Serine/threonine-protein phosphatase 2A 56 kDa regulatory subunit epsilon isoform OS=Homo sapiens GN=PPP2R5E;Serine/threonine-protein phosphatase 2A 56 kDa regulatory subunit epsilon isoform OS=Homo sapiens GN=PPP2R5E PE=1 SV=1	2	1	1	1	0	0	0	1	1	0	0	0	0	1	1	0	0	0	0	1	1	0	3.9	3.9	3.9	54.042	462	462;467	0	2.5189				By MS/MS	By MS/MS		0	0	0	3.9	3.9	0
Q16629-3;Q16629-2;Q16629-4;Q16629	Q16629-3;Q16629-2;Q16629-4;Q16629	5;5;5;5	5;5;5;5	5;5;5;5	Serine/arginine-rich splicing factor 7	SRSF7	Isoform 3 of Serine/arginine-rich splicing factor 7 OS=Homo sapiens GN=SRSF7;Isoform 2 of Serine/arginine-rich splicing factor 7 OS=Homo sapiens GN=SRSF7;Isoform 4 of Serine/arginine-rich splicing factor 7 OS=Homo sapiens GN=SRSF7;Serine/arginine-rich spli	4	5	5	5	5	5	5	2	3	5	5	5	5	2	3	5	5	5	5	2	3	5	35.6	35.6	35.6	15.257	132	132;135;226;238	0	22.444	By MS/MS	By MS/MS	By MS/MS	By MS/MS	By MS/MS	By MS/MS	35.6	35.6	35.6	19.7	25	35.6
Q16630-3;Q16630;Q16630-2	Q16630-3;Q16630;Q16630-2	5;5;5	5;5;5	5;5;5	Cleavage and polyadenylation specificity factor subunit 6	CPSF6	Isoform 3 of Cleavage and polyadenylation specificity factor subunit 6 OS=Homo sapiens GN=CPSF6;Cleavage and polyadenylation specificity factor subunit 6 OS=Homo sapiens GN=CPSF6 PE=1 SV=2;Isoform 2 of Cleavage and polyadenylation specificity factor subuni	3	5	5	5	3	4	4	0	0	4	3	4	4	0	0	4	3	4	4	0	0	4	10.7	10.7	10.7	52.325	478	478;551;588	0	52.968	By MS/MS	By MS/MS	By MS/MS			By MS/MS	7.7	10.5	10.5	0	0	7.9
Q16637-4;Q16637-2;Q16637-3;Q16637	Q16637-4;Q16637-2;Q16637-3;Q16637	2;2;2;2	2;2;2;2	2;2;2;2	Survival motor neuron protein	SMN1	Isoform SMN-delta57 of Survival motor neuron protein OS=Homo sapiens GN=SMN1;Isoform SMN-delta5 of Survival motor neuron protein OS=Homo sapiens GN=SMN1;Isoform SMN-delta7 of Survival motor neuron protein OS=Homo sapiens GN=SMN1;Survival motor neuron prote	4	2	2	2	2	2	2	1	1	1	2	2	2	1	1	1	2	2	2	1	1	1	12.4	12.4	12.4	27.135	250	250;262;282;294	0	14.542	By MS/MS	By MS/MS	By MS/MS	By MS/MS	By MS/MS	By MS/MS	12.4	12.4	12.4	4	4	4
Q16658	Q16658	1	1	1	Fascin	FSCN1	Fascin OS=Homo sapiens GN=FSCN1 PE=1 SV=3	1	1	1	1	0	0	0	1	1	0	0	0	0	1	1	0	0	0	0	1	1	0	2.8	2.8	2.8	54.529	493	493	0	3.7831				By MS/MS	By MS/MS		0	0	0	2.8	2.8	0
Q16666-3;Q16666-2;Q16666;Q16666-6	Q16666-3;Q16666-2;Q16666;Q16666-6	10;10;10;6	10;10;10;6	10;10;10;6	Gamma-interferon-inducible protein 16	IFI16	Isoform 3 of Gamma-interferon-inducible protein 16 OS=Homo sapiens GN=IFI16;Isoform 2 of Gamma-interferon-inducible protein 16 OS=Homo sapiens GN=IFI16;Gamma-interferon-inducible protein 16 OS=Homo sapiens GN=IFI16 PE=1 SV=3;Isoform 4 of Gamma-interferon-i	4	10	10	10	0	2	3	9	8	2	0	2	3	9	8	2	0	2	3	9	8	2	16.2	16.2	16.2	75.935	673	673;729;785;729	0	51.07		By MS/MS	By MS/MS	By MS/MS	By MS/MS	By MS/MS	0	4.3	5.6	14.9	12.3	4.3
Q16774	Q16774	1	1	1	Guanylate kinase	GUK1	Guanylate kinase OS=Homo sapiens GN=GUK1 PE=1 SV=2	1	1	1	1	0	0	0	1	1	0	0	0	0	1	1	0	0	0	0	1	1	0	8.1	8.1	8.1	21.725	197	197	0	2.7394				By MS/MS	By MS/MS		0	0	0	8.1	8.1	0
Q16850-2;Q16850	Q16850-2;Q16850	1;1	1;1	1;1	Lanosterol 14-alpha demethylase	CYP51A1	Isoform 2 of Lanosterol 14-alpha demethylase OS=Homo sapiens GN=CYP51A1;Lanosterol 14-alpha demethylase OS=Homo sapiens GN=CYP51A1 PE=1 SV=3	2	1	1	1	0	0	0	1	1	0	0	0	0	1	1	0	0	0	0	1	1	0	3	3	3	46.312	404	404;503	0.0046729	1.6758				By MS/MS	By MS/MS		0	0	0	3	3	0
Q16891-2;Q16891-4;Q16891;Q16891-3	Q16891-2;Q16891-4;Q16891;Q16891-3	3;3;3;2	3;3;3;2	3;3;3;2	MICOS complex subunit MIC60	IMMT	Isoform 2 of MICOS complex subunit MIC60 OS=Homo sapiens GN=IMMT;Isoform 4 of MICOS complex subunit MIC60 OS=Homo sapiens GN=IMMT;MICOS complex subunit MIC60 OS=Homo sapiens GN=IMMT PE=1 SV=1;Isoform 3 of MICOS complex subunit MIC60 OS=Homo sapiens GN=IMMT	4	3	3	3	0	0	1	3	3	0	0	0	1	3	3	0	0	0	1	3	3	0	4.3	4.3	4.3	82.624	747	747;757;758;726	0	4.8772			By matching	By MS/MS	By MS/MS		0	0	1.3	4.3	4.3	0
Q1ED39	Q1ED39	15	15	15	Lysine-rich nucleolar protein 1	KNOP1	Lysine-rich nucleolar protein 1 OS=Homo sapiens GN=KNOP1 PE=1 SV=1	1	15	15	15	6	6	7	9	12	10	6	6	7	9	12	10	6	6	7	9	12	10	32.1	32.1	32.1	51.588	458	458	0	62.859	By MS/MS	By MS/MS	By MS/MS	By MS/MS	By MS/MS	By MS/MS	12.4	14.2	16.6	19.9	28.8	21.6
Q27J81-2;Q27J81	Q27J81-2;Q27J81	2;2	2;2	2;2	Inverted formin-2	INF2	Isoform 2 of Inverted formin-2 OS=Homo sapiens GN=INF2;Inverted formin-2 OS=Homo sapiens GN=INF2 PE=1 SV=2	2	2	2	2	0	0	0	2	2	0	0	0	0	2	2	0	0	0	0	2	2	0	2.4	2.4	2.4	134.62	1240	1240;1249	0	30.097				By MS/MS	By MS/MS		0	0	0	2.4	2.4	0
Q29RF7	Q29RF7	12	12	12	Sister chromatid cohesion protein PDS5 homolog A	PDS5A	Sister chromatid cohesion protein PDS5 homolog A OS=Homo sapiens GN=PDS5A PE=1 SV=1	1	12	12	12	2	2	4	11	11	2	2	2	4	11	11	2	2	2	4	11	11	2	12	12	12	150.83	1337	1337	0	308.43	By matching	By MS/MS	By MS/MS	By MS/MS	By MS/MS	By MS/MS	2.5	2.2	3.6	11	11	2.2
Q2M389	Q2M389	1	1	1	WASH complex subunit 7	KIAA1033	WASH complex subunit 4 OS=Homo sapiens GN=WASHC4 PE=1 SV=2	1	1	1	1	0	0	0	0	1	0	0	0	0	0	1	0	0	0	0	0	1	0	1.5	1.5	1.5	136.4	1173	1173	0	4.0527					By MS/MS		0	0	0	0	1.5	0
Q2TAL8	Q2TAL8	1	1	1	Glutamine-rich protein 1	QRICH1	Glutamine-rich protein 1 OS=Homo sapiens GN=QRICH1 PE=1 SV=1	1	1	1	1	0	1	0	1	1	0	0	1	0	1	1	0	0	1	0	1	1	0	1.4	1.4	1.4	86.435	776	776	0.00074405	2.2753		By matching		By MS/MS	By MS/MS		0	1.4	0	1.4	1.4	0
Q2TB10	Q2TB10	2	2	2	Zinc finger protein 800	ZNF800	Zinc finger protein 800 OS=Homo sapiens GN=ZNF800 PE=1 SV=1	1	2	2	2	0	0	0	2	2	0	0	0	0	2	2	0	0	0	0	2	2	0	6.5	6.5	6.5	75.235	664	664	0	7.8205				By MS/MS	By MS/MS		0	0	0	6.5	6.5	0
Q2TBE0;Q2TBE0-2;Q2TBE0-3	Q2TBE0;Q2TBE0-2;Q2TBE0-3	6;6;5	6;6;5	6;6;5	CWF19-like protein 2	CWF19L2	CWF19-like protein 2 OS=Homo sapiens GN=CWF19L2 PE=1 SV=4;Isoform 2 of CWF19-like protein 2 OS=Homo sapiens GN=CWF19L2;Isoform 3 of CWF19-like protein 2 OS=Homo sapiens GN=CWF19L2	3	6	6	6	5	3	2	1	1	3	5	3	2	1	1	3	5	3	2	1	1	3	7.6	7.6	7.6	103.79	894	894;742;672	0	15.603	By MS/MS	By MS/MS	By MS/MS	By matching	By matching	By MS/MS	6	3.9	1.9	1	1	3.5
Q2V2M9-2;Q2V2M9;Q2V2M9-3;Q2V2M9-4	Q2V2M9-2;Q2V2M9;Q2V2M9-3;Q2V2M9-4	2;2;2;2	2;2;2;2	2;2;2;2	FH1/FH2 domain-containing protein 3	FHOD3	Isoform 2 of FH1/FH2 domain-containing protein 3 OS=Homo sapiens GN=FHOD3;FH1/FH2 domain-containing protein 3 OS=Homo sapiens GN=FHOD3 PE=1 SV=2;Isoform 3 of FH1/FH2 domain-containing protein 3 OS=Homo sapiens GN=FHOD3;Isoform 4 of FH1/FH2 domain-containin	4	2	2	2	0	0	0	2	1	0	0	0	0	2	1	0	0	0	0	2	1	0	2.3	2.3	2.3	156.75	1401	1401;1422;1439;1622	0	8.7345				By MS/MS	By MS/MS		0	0	0	2.3	1.1	0
Q32MZ4-3;Q32MZ4-2;Q32MZ4	Q32MZ4-3;Q32MZ4-2;Q32MZ4	2;2;2	2;2;2	2;2;2	Leucine-rich repeat flightless-interacting protein 1	LRRFIP1	Isoform 3 of Leucine-rich repeat flightless-interacting protein 1 OS=Homo sapiens GN=LRRFIP1;Isoform 2 of Leucine-rich repeat flightless-interacting protein 1 OS=Homo sapiens GN=LRRFIP1;Leucine-rich repeat flightless-interacting protein 1 OS=Homo sapiens G	3	2	2	2	0	0	0	0	2	0	0	0	0	0	2	0	0	0	0	0	2	0	4.3	4.3	4.3	82.688	752	752;784;808	0	13.413					By MS/MS		0	0	0	0	4.3	0
Q32NC0-2;Q32NC0	Q32NC0-2;Q32NC0	1;1	1;1	1;1	UPF0711 protein C18orf21	C18orf21	Isoform 2 of UPF0711 protein C18orf21 OS=Homo sapiens GN=C18orf21;UPF0711 protein C18orf21 OS=Homo sapiens GN=C18orf21 PE=1 SV=1	2	1	1	1	0	0	0	1	1	0	0	0	0	1	1	0	0	0	0	1	1	0	10.6	10.6	10.6	14.527	132	132;220	0	18.351				By MS/MS	By MS/MS		0	0	0	10.6	10.6	0
Q3B726	Q3B726	4	4	4	DNA-directed RNA polymerase I subunit RPA43	TWISTNB	DNA-directed RNA polymerase I subunit RPA43 OS=Homo sapiens GN=TWISTNB PE=1 SV=1	1	4	4	4	1	3	3	1	2	3	1	3	3	1	2	3	1	3	3	1	2	3	9.5	9.5	9.5	37.432	338	338	0	35.432	By MS/MS	By MS/MS	By MS/MS	By MS/MS	By MS/MS	By MS/MS	5	9.5	9.5	4.1	4.4	9.5
Q3KQU3-2;Q3KQU3-4;Q3KQU3	Q3KQU3-2;Q3KQU3-4;Q3KQU3	4;4;4	4;4;4	4;4;4	MAP7 domain-containing protein 1	MAP7D1	Isoform 2 of MAP7 domain-containing protein 1 OS=Homo sapiens GN=MAP7D1;Isoform 4 of MAP7 domain-containing protein 1 OS=Homo sapiens GN=MAP7D1;MAP7 domain-containing protein 1 OS=Homo sapiens GN=MAP7D1 PE=1 SV=1	3	4	4	4	1	4	3	2	4	3	1	4	3	2	4	3	1	4	3	2	4	3	6	6	6	88.725	803	803;808;841	0	7.333	By MS/MS	By MS/MS	By MS/MS	By MS/MS	By MS/MS	By MS/MS	1	6	4.2	3.2	6	4.5
Q3YEC7;Q3YEC7-2	Q3YEC7;Q3YEC7-2	2;2	2;2	2;2	Rab-like protein 6	RABL6	Rab-like protein 6 OS=Homo sapiens GN=RABL6 PE=1 SV=2;Isoform 2 of Rab-like protein 6 OS=Homo sapiens GN=RABL6	2	2	2	2	1	2	1	1	1	1	1	2	1	1	1	1	1	2	1	1	1	1	3.8	3.8	3.8	79.548	729	729;730	0	3.7757	By MS/MS	By MS/MS	By MS/MS	By MS/MS	By MS/MS	By MS/MS	2.1	3.8	2.1	2.1	2.1	1.8
Q3ZCQ8;Q3ZCQ8-2	Q3ZCQ8;Q3ZCQ8-2	2;2	2;2	2;2	Mitochondrial import inner membrane translocase subunit TIM50	TIMM50	Mitochondrial import inner membrane translocase subunit TIM50 OS=Homo sapiens GN=TIMM50 PE=1 SV=2;Isoform 2 of Mitochondrial import inner membrane translocase subunit TIM50 OS=Homo sapiens GN=TIMM50	2	2	2	2	0	0	0	2	2	0	0	0	0	2	2	0	0	0	0	2	2	0	7.9	7.9	7.9	39.646	353	353;456	0	15.934				By MS/MS	By MS/MS		0	0	0	7.9	7.9	0
Q49A26-5;Q49A26-4;Q49A26-2;Q49A26-3;Q49A26	Q49A26-5;Q49A26-4;Q49A26-2;Q49A26-3;Q49A26	1;1;1;1;1	1;1;1;1;1	1;1;1;1;1	Putative oxidoreductase GLYR1	GLYR1	Isoform 5 of Putative oxidoreductase GLYR1 OS=Homo sapiens GN=GLYR1;Isoform 4 of Putative oxidoreductase GLYR1 OS=Homo sapiens GN=GLYR1;Isoform 2 of Putative oxidoreductase GLYR1 OS=Homo sapiens GN=GLYR1;Isoform 3 of Putative oxidoreductase GLYR1 OS=Homo s	5	1	1	1	1	0	1	1	1	0	1	0	1	1	1	0	1	0	1	1	1	0	3	3	3	51.508	472	472;484;536;547;553	0	2.628	By MS/MS		By matching	By MS/MS	By MS/MS		3	0	3	3	3	0
Q4G0F5	Q4G0F5	1	1	1	Vacuolar protein sorting-associated protein 26B	VPS26B	Vacuolar protein sorting-associated protein 26B OS=Homo sapiens GN=VPS26B PE=1 SV=2	1	1	1	1	0	0	0	1	1	0	0	0	0	1	1	0	0	0	0	1	1	0	3.6	3.6	3.6	39.154	336	336	0.00073692	2.2321				By MS/MS	By MS/MS		0	0	0	3.6	3.6	0
Q4G0J3;Q4G0J3-3;Q4G0J3-2	Q4G0J3;Q4G0J3-3	16;15;6	16;15;6	16;15;6	La-related protein 7	LARP7	La-related protein 7 OS=Homo sapiens GN=LARP7 PE=1 SV=1;Isoform 3 of La-related protein 7 OS=Homo sapiens GN=LARP7	3	16	16	16	9	11	13	4	5	15	9	11	13	4	5	15	9	11	13	4	5	15	29.9	29.9	29.9	66.898	582	582;589;214	0	185.84	By MS/MS	By MS/MS	By MS/MS	By MS/MS	By MS/MS	By MS/MS	20.3	20.6	27	9.8	9.1	28.4
Q4KMP7;Q4KMP7-2	Q4KMP7;Q4KMP7-2	2;1	2;1	2;1	TBC1 domain family member 10B	TBC1D10B	TBC1 domain family member 10B OS=Homo sapiens GN=TBC1D10B PE=1 SV=3;Isoform 2 of TBC1 domain family member 10B OS=Homo sapiens GN=TBC1D10B	2	2	2	2	0	1	1	0	0	2	0	1	1	0	0	2	0	1	1	0	0	2	5.9	5.9	5.9	87.198	808	808;233	0	2.3925		By matching	By MS/MS			By MS/MS	0	1.7	1.7	0	0	5.9
Q53EP0;Q53EP0-2	Q53EP0;Q53EP0-2	4;3	4;3	4;3	Fibronectin type III domain-containing protein 3B	FNDC3B	Fibronectin type III domain-containing protein 3B OS=Homo sapiens GN=FNDC3B PE=1 SV=2;Isoform 2 of Fibronectin type III domain-containing protein 3B OS=Homo sapiens GN=FNDC3B	2	4	4	4	0	1	1	2	3	2	0	1	1	2	3	2	0	1	1	2	3	2	4.7	4.7	4.7	132.89	1204	1204;629	0	8.3621		By MS/MS	By matching	By MS/MS	By MS/MS	By MS/MS	0	0.9	0.9	2.5	3.7	2.2
Q53EU6	Q53EU6	3	3	3	Glycerol-3-phosphate acyltransferase 3	AGPAT9	Glycerol-3-phosphate acyltransferase 3 OS=Homo sapiens GN=GPAT3 PE=1 SV=2	1	3	3	3	0	0	0	3	2	0	0	0	0	3	2	0	0	0	0	3	2	0	6.7	6.7	6.7	48.705	434	434	0	13.785				By MS/MS	By MS/MS		0	0	0	6.7	5.1	0
Q9P0S3;Q53FV1	Q9P0S3;Q53FV1	1;1	1;1	1;1	ORM1-like protein 1;ORM1-like protein 2	ORMDL1;ORMDL2	ORM1-like protein 1 OS=Homo sapiens GN=ORMDL1 PE=1 SV=1;ORM1-like protein 2 OS=Homo sapiens GN=ORMDL2 PE=1 SV=2	2	1	1	1	0	1	0	1	1	1	0	1	0	1	1	1	0	1	0	1	1	1	9.8	9.8	9.8	17.371	153	153;153	0	13.748		By matching		By MS/MS	By MS/MS	By MS/MS	0	9.8	0	9.8	9.8	9.8
Q56NI9-2;Q56NI9	Q56NI9-2;Q56NI9	1;1	1;1	1;1	N-acetyltransferase ESCO2	ESCO2	Isoform 2 of N-acetyltransferase ESCO2 OS=Homo sapiens GN=ESCO2;N-acetyltransferase ESCO2 OS=Homo sapiens GN=ESCO2 PE=1 SV=1	2	1	1	1	0	0	1	1	1	0	0	0	1	1	1	0	0	0	1	1	1	0	7.5	7.5	7.5	27.499	239	239;601	0	6.1383			By matching	By MS/MS	By MS/MS		0	0	7.5	7.5	7.5	0
Q56VL3	Q56VL3	1	1	1	OCIA domain-containing protein 2	OCIAD2	OCIA domain-containing protein 2 OS=Homo sapiens GN=OCIAD2 PE=1 SV=1	1	1	1	1	0	0	0	1	1	0	0	0	0	1	1	0	0	0	0	1	1	0	9.1	9.1	9.1	16.953	154	154	0.0046698	1.6753				By MS/MS	By MS/MS		0	0	0	9.1	9.1	0
Q5BJH7-4;Q5BJH7-5;Q5BJH7-3;Q5BJH7	Q5BJH7-4;Q5BJH7-5;Q5BJH7-3;Q5BJH7	1;1;1;1	1;1;1;1	1;1;1;1	Protein YIF1B	YIF1B	Isoform 4 of Protein YIF1B OS=Homo sapiens GN=YIF1B;Isoform 5 of Protein YIF1B OS=Homo sapiens GN=YIF1B;Isoform 3 of Protein YIF1B OS=Homo sapiens GN=YIF1B;Protein YIF1B OS=Homo sapiens GN=YIF1B PE=1 SV=1	4	1	1	1	0	0	0	1	1	0	0	0	0	1	1	0	0	0	0	1	1	0	5.2	5.2	5.2	31.245	291	291;294;311;314	0	3.09				By MS/MS	By MS/MS		0	0	0	5.2	5.2	0
Q8N9E0;Q5BKY9;Q5BKY9-2	Q8N9E0;Q5BKY9;Q5BKY9-2	2;2;1	2;2;1	2;2;1	Protein FAM133A;Protein FAM133B	FAM133A;FAM133B	Protein FAM133A OS=Homo sapiens GN=FAM133A PE=1 SV=1;Protein FAM133B OS=Homo sapiens GN=FAM133B PE=1 SV=1;Isoform 2 of Protein FAM133B OS=Homo sapiens GN=FAM133B	3	2	2	2	2	1	0	0	0	0	2	1	0	0	0	0	2	1	0	0	0	0	7.7	7.7	7.7	28.94	248	248;247;237	0.00074074	2.2658	By MS/MS	By MS/MS					7.7	3.2	0	0	0	0
Q5BKZ1;Q5BKZ1-3	Q5BKZ1	3;1	3;1	3;1	DBIRD complex subunit ZNF326	ZNF326	DBIRD complex subunit ZNF326 OS=Homo sapiens GN=ZNF326 PE=1 SV=2	2	3	3	3	2	2	1	3	3	3	2	2	1	3	3	3	2	2	1	3	3	3	6.2	6.2	6.2	65.653	582	582;376	0	9.0144	By matching	By matching	By matching	By MS/MS	By MS/MS	By MS/MS	4.3	4.1	1.9	6.2	6.2	6.2
Q5C9Z4	Q5C9Z4	6	6	6	Nucleolar MIF4G domain-containing protein 1	NOM1	Nucleolar MIF4G domain-containing protein 1 OS=Homo sapiens GN=NOM1 PE=1 SV=1	1	6	6	6	1	1	0	6	5	2	1	1	0	6	5	2	1	1	0	6	5	2	7.7	7.7	7.7	96.256	860	860	0	12.31	By MS/MS	By matching		By MS/MS	By MS/MS	By MS/MS	1.5	1.5	0	7.7	7.7	3.4
Q5F1R6;Q5F1R6-3;Q5F1R6-2	Q5F1R6;Q5F1R6-3;Q5F1R6-2	5;5;4	5;5;4	5;5;4	DnaJ homolog subfamily C member 21	DNAJC21	DnaJ homolog subfamily C member 21 OS=Homo sapiens GN=DNAJC21 PE=1 SV=2;Isoform 3 of DnaJ homolog subfamily C member 21 OS=Homo sapiens GN=DNAJC21;Isoform 2 of DnaJ homolog subfamily C member 21 OS=Homo sapiens GN=DNAJC21	3	5	5	5	3	3	3	0	1	4	3	3	3	0	1	4	3	3	3	0	1	4	14.1	14.1	14.1	62.027	531	531;544;576	0	118.83	By MS/MS	By MS/MS	By MS/MS		By matching	By MS/MS	8.1	7.7	7.7	0	2.1	11.7
Q5FBB7-6;Q5FBB7;Q5FBB7-5;Q5FBB7-4;Q5FBB7-3;Q5FBB7-2	Q5FBB7-6;Q5FBB7	3;3;1;1;1;1	3;3;1;1;1;1	3;3;1;1;1;1	Shugoshin-like 1	SGOL1	Isoform 6 of Shugoshin 1 OS=Homo sapiens GN=SGO1;Shugoshin 1 OS=Homo sapiens GN=SGO1 PE=1 SV=1	6	3	3	3	2	2	0	0	0	1	2	2	0	0	0	1	2	2	0	0	0	1	8.9	8.9	8.9	60.121	527	527;561;258;275;292;309	0	5.5514	By MS/MS	By MS/MS				By MS/MS	6.3	5.5	0	0	0	2.7
Q5FWF5-2;Q5FWF5	Q5FWF5-2;Q5FWF5	2;2	2;2	2;2	N-acetyltransferase ESCO1	ESCO1	Isoform 2 of N-acetyltransferase ESCO1 OS=Homo sapiens GN=ESCO1;N-acetyltransferase ESCO1 OS=Homo sapiens GN=ESCO1 PE=1 SV=3	2	2	2	2	1	1	2	1	0	1	1	1	2	1	0	1	1	1	2	1	0	1	4.1	4.1	4.1	78.986	701	701;840	0	8.1486	By matching	By MS/MS	By MS/MS	By matching		By matching	2.7	2.7	4.1	2.7	0	1.4
Q5JPH6;Q5JPH6-2	Q5JPH6;Q5JPH6-2	1;1	1;1	1;1	Probable glutamate--tRNA ligase, mitochondrial	EARS2	Probable glutamate--tRNA ligase, mitochondrial OS=Homo sapiens GN=EARS2 PE=1 SV=2;Isoform 2 of Probable glutamate--tRNA ligase, mitochondrial OS=Homo sapiens GN=EARS2	2	1	1	1	0	0	0	1	1	0	0	0	0	1	1	0	0	0	0	1	1	0	1.9	1.9	1.9	58.688	523	523;534	0.00074738	2.2952				By MS/MS	By matching		0	0	0	1.9	1.9	0
Q5JSZ5-5;Q5JSZ5	Q5JSZ5-5;Q5JSZ5	1;1	1;1	1;1	Protein PRRC2B	PRRC2B	Isoform 1 of Protein PRRC2B OS=Homo sapiens GN=PRRC2B;Protein PRRC2B OS=Homo sapiens GN=PRRC2B PE=1 SV=2	2	1	1	1	0	0	0	1	1	0	0	0	0	1	1	0	0	0	0	1	1	0	1.3	1.3	1.3	165.53	1535	1535;2229	0	16.831				By MS/MS	By MS/MS		0	0	0	1.3	1.3	0
Q5JTH9;Q5JTH9-2;Q5JTH9-3	Q5JTH9;Q5JTH9-2;Q5JTH9-3	15;14;14	15;14;14	15;14;14	RRP12-like protein	RRP12	RRP12-like protein OS=Homo sapiens GN=RRP12 PE=1 SV=2;Isoform 2 of RRP12-like protein OS=Homo sapiens GN=RRP12;Isoform 3 of RRP12-like protein OS=Homo sapiens GN=RRP12	3	15	15	15	2	5	4	13	13	4	2	5	4	13	13	4	2	5	4	13	13	4	12.6	12.6	12.6	143.7	1297	1297;1197;1236	0	56.719	By MS/MS	By MS/MS	By MS/MS	By MS/MS	By MS/MS	By MS/MS	1.6	4.2	3.6	10.9	9.6	3.7
Q5JTW2;Q5JTW2-3;Q5JTW2-5;Q5JTW2-2	Q5JTW2;Q5JTW2-3;Q5JTW2-5;Q5JTW2-2	1;1;1;1	1;1;1;1	1;1;1;1	Centrosomal protein of 78 kDa	CEP78	Centrosomal protein of 78 kDa OS=Homo sapiens GN=CEP78 PE=1 SV=1;Isoform 3 of Centrosomal protein of 78 kDa OS=Homo sapiens GN=CEP78;Isoform 4 of Centrosomal protein of 78 kDa OS=Homo sapiens GN=CEP78;Isoform 2 of Centrosomal protein of 78 kDa OS=Homo sapi	4	1	1	1	0	0	0	0	1	0	0	0	0	0	1	0	0	0	0	0	1	0	2.2	2.2	2.2	76.396	689	689;705;706;722	0.0007326	2.2034					By MS/MS		0	0	0	0	2.2	0
Q5JVF3-3;Q5JVF3-2;Q5JVF3;Q5JVF3-4	Q5JVF3-3;Q5JVF3-2;Q5JVF3;Q5JVF3-4	3;3;3;3	3;3;3;3	3;3;3;3	PCI domain-containing protein 2	PCID2	Isoform 3 of PCI domain-containing protein 2 OS=Homo sapiens GN=PCID2;Isoform 2 of PCI domain-containing protein 2 OS=Homo sapiens GN=PCID2;PCI domain-containing protein 2 OS=Homo sapiens GN=PCID2 PE=1 SV=2;Isoform 4 of PCI domain-containing protein 2 OS=H	4	3	3	3	0	0	0	3	3	0	0	0	0	3	3	0	0	0	0	3	3	0	10.6	10.6	10.6	43.374	376	376;397;399;453	0	62.3				By MS/MS	By MS/MS		0	0	0	10.6	10.6	0
Q5K651	Q5K651	2	2	2	Sterile alpha motif domain-containing protein 9	SAMD9	Sterile alpha motif domain-containing protein 9 OS=Homo sapiens GN=SAMD9 PE=1 SV=1	1	2	2	2	0	0	0	0	2	1	0	0	0	0	2	1	0	0	0	0	2	1	1.4	1.4	1.4	184.28	1589	1589	0	8.9092					By MS/MS	By matching	0	0	0	0	1.4	0.6
Q5QJE6	Q5QJE6	7	7	7	Deoxynucleotidyltransferase terminal-interacting protein 2	DNTTIP2	Deoxynucleotidyltransferase terminal-interacting protein 2 OS=Homo sapiens GN=DNTTIP2 PE=1 SV=2	1	7	7	7	1	1	0	7	5	2	1	1	0	7	5	2	1	1	0	7	5	2	12.2	12.2	12.2	84.468	756	756	0	64.65	By MS/MS	By MS/MS		By MS/MS	By MS/MS	By matching	1.9	1.9	0	12.2	8.5	3.8
Q5SQI0-3;Q5SQI0-2;Q5SQI0	Q5SQI0-3;Q5SQI0-2;Q5SQI0	1;1;1	1;1;1	1;1;1	Alpha-tubulin N-acetyltransferase 1	ATAT1	Isoform 3 of Alpha-tubulin N-acetyltransferase 1 OS=Homo sapiens GN=ATAT1;Isoform 2 of Alpha-tubulin N-acetyltransferase 1 OS=Homo sapiens GN=ATAT1;Alpha-tubulin N-acetyltransferase 1 OS=Homo sapiens GN=ATAT1 PE=1 SV=1	3	1	1	1	0	0	0	1	1	0	0	0	0	1	1	0	0	0	0	1	1	0	6	6	6	44.458	398	398;409;421	0	2.402				By matching	By MS/MS		0	0	0	6	6	0
Q5SRE5-2;Q5SRE5	Q5SRE5-2;Q5SRE5	6;6	6;6	6;6	Nucleoporin NUP188 homolog	NUP188	Isoform 2 of Nucleoporin NUP188 homolog OS=Homo sapiens GN=NUP188;Nucleoporin NUP188 homolog OS=Homo sapiens GN=NUP188 PE=1 SV=1	2	6	6	6	1	1	1	6	5	0	1	1	1	6	5	0	1	1	1	6	5	0	4.2	4.2	4.2	182.29	1638	1638;1749	0	38.132	By matching	By MS/MS	By matching	By MS/MS	By MS/MS		1	1	1	4.2	4.1	0
Q5SSJ5;Q5SSJ5-3;Q5SSJ5-2;Q5SSJ5-5	Q5SSJ5;Q5SSJ5-3;Q5SSJ5-2	10;9;9;1	10;9;9;1	10;9;9;1	Heterochromatin protein 1-binding protein 3	HP1BP3	Heterochromatin protein 1-binding protein 3 OS=Homo sapiens GN=HP1BP3 PE=1 SV=1;Isoform 3 of Heterochromatin protein 1-binding protein 3 OS=Homo sapiens GN=HP1BP3;Isoform 2 of Heterochromatin protein 1-binding protein 3 OS=Homo sapiens GN=HP1BP3	4	10	10	10	7	6	9	5	7	8	7	6	9	5	7	8	7	6	9	5	7	8	17.7	17.7	17.7	61.206	553	553;401;515;133	0	49.442	By MS/MS	By MS/MS	By MS/MS	By MS/MS	By MS/MS	By MS/MS	12.3	11.4	15.9	9.6	12.8	14.6
Q5SW79;Q5SW79-3;Q5SW79-2	Q5SW79;Q5SW79-3;Q5SW79-2	7;7;6	7;7;6	7;7;6	Centrosomal protein of 170 kDa	CEP170	Centrosomal protein of 170 kDa OS=Homo sapiens GN=CEP170 PE=1 SV=1;Isoform 3 of Centrosomal protein of 170 kDa OS=Homo sapiens GN=CEP170;Isoform 2 of Centrosomal protein of 170 kDa OS=Homo sapiens GN=CEP170	3	7	7	7	1	3	4	7	6	3	1	3	4	7	6	3	1	3	4	7	6	3	5.6	5.6	5.6	175.29	1584	1584;1486;1460	0	20.287	By matching	By MS/MS	By MS/MS	By MS/MS	By MS/MS	By MS/MS	0.7	2.6	3.5	5.6	4.9	2.6
Q5T160	Q5T160	1	1	1	Probable arginine--tRNA ligase, mitochondrial	RARS2	Probable arginine--tRNA ligase, mitochondrial OS=Homo sapiens GN=RARS2 PE=1 SV=1	1	1	1	1	0	0	0	1	1	0	0	0	0	1	1	0	0	0	0	1	1	0	2.2	2.2	2.2	65.505	578	578	0	12.182				By MS/MS	By MS/MS		0	0	0	2.2	2.2	0
Q5T200;Q5T200-2	Q5T200;Q5T200-2	16;14	16;14	16;14	Zinc finger CCCH domain-containing protein 13	ZC3H13	Zinc finger CCCH domain-containing protein 13 OS=Homo sapiens GN=ZC3H13 PE=1 SV=1;Isoform 2 of Zinc finger CCCH domain-containing protein 13 OS=Homo sapiens GN=ZC3H13	2	16	16	16	7	10	13	7	6	15	7	10	13	7	6	15	7	10	13	7	6	15	10.7	10.7	10.7	196.63	1668	1668;1564	0	151.71	By MS/MS	By MS/MS	By MS/MS	By MS/MS	By MS/MS	By MS/MS	5.4	7.4	7.7	5.2	4.9	10
Q5T3I0;Q5T3I0-3	Q5T3I0;Q5T3I0-3	10;9	10;9	10;9	G patch domain-containing protein 4	GPATCH4	G patch domain-containing protein 4 OS=Homo sapiens GN=GPATCH4 PE=1 SV=2;Isoform 3 of G patch domain-containing protein 4 OS=Homo sapiens GN=GPATCH4	2	10	10	10	8	6	8	3	4	9	8	6	8	3	4	9	8	6	8	3	4	9	26.5	26.5	26.5	50.381	446	446;451	0	143.63	By MS/MS	By MS/MS	By MS/MS	By matching	By MS/MS	By MS/MS	23.5	17.3	20.2	10.1	11.7	22.6
Q5T4S7-3;Q5T4S7-4;Q5T4S7;Q5T4S7-2;Q5T4S7-5;Q5T4S7-6	Q5T4S7-3;Q5T4S7-4;Q5T4S7;Q5T4S7-2	7;7;7;7;3;1	7;7;7;7;3;1	7;7;7;7;3;1	E3 ubiquitin-protein ligase UBR4	UBR4	Isoform 3 of E3 ubiquitin-protein ligase UBR4 OS=Homo sapiens GN=UBR4;Isoform 4 of E3 ubiquitin-protein ligase UBR4 OS=Homo sapiens GN=UBR4;E3 ubiquitin-protein ligase UBR4 OS=Homo sapiens GN=UBR4 PE=1 SV=1;Isoform 2 of E3 ubiquitin-protein ligase UBR4 OS=	6	7	7	7	0	0	0	5	7	0	0	0	0	5	7	0	0	0	0	5	7	0	2.7	2.7	2.7	571.85	5159	5159;5176;5183;5204;2456;212	0	58.816				By MS/MS	By MS/MS		0	0	0	1.6	2.7	0
Q5T5B0	Q5T5B0	1	1	1	Late cornified envelope protein 3E	LCE3E	Late cornified envelope protein 3E OS=Homo sapiens GN=LCE3E PE=1 SV=1	1	1	1	1	0	0	0	0	1	0	0	0	0	0	1	0	0	0	0	0	1	0	27.2	27.2	27.2	9.5066	92	92	0	2.6585					By MS/MS		0	0	0	0	27.2	0
Q5T5Y3-2;Q5T5Y3;Q5T5Y3-3	Q5T5Y3-2;Q5T5Y3;Q5T5Y3-3	2;2;2	2;2;2	2;2;2	Calmodulin-regulated spectrin-associated protein 1	CAMSAP1	Isoform 2 of Calmodulin-regulated spectrin-associated protein 1 OS=Homo sapiens GN=CAMSAP1;Calmodulin-regulated spectrin-associated protein 1 OS=Homo sapiens GN=CAMSAP1 PE=1 SV=2;Isoform 3 of Calmodulin-regulated spectrin-associated protein 1 OS=Homo sapie	3	2	2	2	1	0	0	2	2	0	1	0	0	2	2	0	1	0	0	2	2	0	1.5	1.5	1.5	146.54	1324	1324;1602;1613	0	2.3613	By matching			By MS/MS	By MS/MS		0.8	0	0	1.5	1.5	0
Q5T6F2	Q5T6F2	1	1	1	Ubiquitin-associated protein 2	UBAP2	Ubiquitin-associated protein 2 OS=Homo sapiens GN=UBAP2 PE=1 SV=1	1	1	1	1	0	0	0	1	1	0	0	0	0	1	1	0	0	0	0	1	1	0	1.3	1.3	1.3	117.11	1119	1119	0	2.4058				By MS/MS	By MS/MS		0	0	0	1.3	1.3	0
Q5T8P6-3;Q5T8P6-2;Q5T8P6;Q5T8P6-5;Q5T8P6-4;Q5T8P6-6	Q5T8P6-3;Q5T8P6-2;Q5T8P6;Q5T8P6-5;Q5T8P6-4	5;5;5;4;4;1	5;5;5;4;4;1	5;5;5;4;4;1	RNA-binding protein 26	RBM26	Isoform 3 of RNA-binding protein 26 OS=Homo sapiens GN=RBM26;Isoform 2 of RNA-binding protein 26 OS=Homo sapiens GN=RBM26;RNA-binding protein 26 OS=Homo sapiens GN=RBM26 PE=1 SV=3;Isoform 5 of RNA-binding protein 26 OS=Homo sapiens GN=RBM26;Isoform 4 of RN	6	5	5	5	3	4	4	1	1	2	3	4	4	1	1	2	3	4	4	1	1	2	6.6	6.6	6.6	110.66	980	980;983;1007;534;558;120	0	10.793	By MS/MS	By MS/MS	By MS/MS	By matching	By matching	By MS/MS	3.8	5.1	5.3	1.3	1.3	2.4
Q5T9A4;Q5T9A4-3	Q5T9A4;Q5T9A4-3	7;5	7;5	2;1	ATPase family AAA domain-containing protein 3B	ATAD3B	ATPase family AAA domain-containing protein 3B OS=Homo sapiens GN=ATAD3B PE=1 SV=1;Isoform 3 of ATPase family AAA domain-containing protein 3B OS=Homo sapiens GN=ATAD3B	2	7	7	2	1	2	1	6	6	1	1	2	1	6	6	1	0	0	0	2	1	0	13.1	13.1	4.6	72.572	648	648;602	0	50.233	By matching	By MS/MS	By MS/MS	By MS/MS	By MS/MS	By MS/MS	3.5	5.2	3.5	11.9	10	3.5
Q5TAX3-2;Q5TAX3	Q5TAX3-2;Q5TAX3	1;1	1;1	1;1	Terminal uridylyltransferase 4	ZCCHC11	Isoform 2 of Terminal uridylyltransferase 4 OS=Homo sapiens GN=ZCCHC11;Terminal uridylyltransferase 4 OS=Homo sapiens GN=ZCCHC11 PE=1 SV=3	2	1	1	1	0	1	1	0	0	1	0	1	1	0	0	1	0	1	1	0	0	1	1.4	1.4	1.4	81.14	719	719;1644	0.0052701	1.6151		By MS/MS	By MS/MS			By matching	0	1.4	1.4	0	0	1.4
Q5TH69	Q5TH69	1	1	1	Brefeldin A-inhibited guanine nucleotide-exchange protein 3	ARFGEF3	Brefeldin A-inhibited guanine nucleotide-exchange protein 3 OS=Homo sapiens GN=ARFGEF3 PE=1 SV=3	1	1	1	1	0	0	0	1	1	0	0	0	0	1	1	0	0	0	0	1	1	0	0.7	0.7	0.7	240.65	2177	2177	0.0014235	2.0198				By MS/MS	By MS/MS		0	0	0	0.7	0.7	0
Q5UIP0-2;Q5UIP0	Q5UIP0-2;Q5UIP0	8;8	8;8	8;8	Telomere-associated protein RIF1	RIF1	Isoform 2 of Telomere-associated protein RIF1 OS=Homo sapiens GN=RIF1;Telomere-associated protein RIF1 OS=Homo sapiens GN=RIF1 PE=1 SV=2	2	8	8	8	1	0	0	8	7	0	1	0	0	8	7	0	1	0	0	8	7	0	3.5	3.5	3.5	271.69	2446	2446;2472	0	64.784	By matching			By MS/MS	By MS/MS		0.3	0	0	3.5	3.1	0
Q5VTL8;Q5VTL8-2	Q5VTL8;Q5VTL8-2	6;3	6;3	6;3	Pre-mRNA-splicing factor 38B	PRPF38B	Pre-mRNA-splicing factor 38B OS=Homo sapiens GN=PRPF38B PE=1 SV=1;Isoform 2 of Pre-mRNA-splicing factor 38B OS=Homo sapiens GN=PRPF38B	2	6	6	6	5	6	4	4	4	5	5	6	4	4	4	5	5	6	4	4	4	5	16.1	16.1	16.1	64.467	546	546;190	0	86.539	By MS/MS	By MS/MS	By MS/MS	By MS/MS	By MS/MS	By MS/MS	15.9	16.1	14.1	6.4	6.4	16.1
Q5VWG9	Q5VWG9	2	2	2	Transcription initiation factor TFIID subunit 3	TAF3	Transcription initiation factor TFIID subunit 3 OS=Homo sapiens GN=TAF3 PE=1 SV=1	1	2	2	2	2	1	0	0	0	1	2	1	0	0	0	1	2	1	0	0	0	1	3.1	3.1	3.1	103.58	929	929	0.0040568	1.7207	By MS/MS	By MS/MS				By MS/MS	3.1	1.2	0	0	0	1.2
Q5VWQ0-4;Q5VWQ0	Q5VWQ0-4;Q5VWQ0	3;3	3;3	3;3	Round spermatid basic protein 1	RSBN1	Isoform 4 of Lysine-specific demethylase 9 OS=Homo sapiens GN=RSBN1;Lysine-specific demethylase 9 OS=Homo sapiens GN=RSBN1 PE=1 SV=2	2	3	3	3	1	3	2	0	0	3	1	3	2	0	0	3	1	3	2	0	0	3	8.9	8.9	8.9	50.801	459	459;802	0	8.2366	By MS/MS	By MS/MS	By MS/MS			By MS/MS	2.4	8.9	6.5	0	0	8.9
Q5VYK3	Q5VYK3	8	8	8	Proteasome-associated protein ECM29 homolog	ECM29	Proteasome-associated protein ECM29 homolog OS=Homo sapiens GN=ECM29 PE=1 SV=2	1	8	8	8	0	0	0	7	7	0	0	0	0	7	7	0	0	0	0	7	7	0	5.9	5.9	5.9	204.29	1845	1845	0	174.64				By MS/MS	By MS/MS		0	0	0	5	5.2	0
Q5VYS8-4;Q5VYS8-6;Q5VYS8	Q5VYS8-4;Q5VYS8-6;Q5VYS8	1;1;1	1;1;1	1;1;1	Terminal uridylyltransferase 7	ZCCHC6	Isoform 4 of Terminal uridylyltransferase 7 OS=Homo sapiens GN=ZCCHC6;Isoform 6 of Terminal uridylyltransferase 7 OS=Homo sapiens GN=ZCCHC6;Terminal uridylyltransferase 7 OS=Homo sapiens GN=ZCCHC6 PE=1 SV=1	3	1	1	1	0	0	0	1	1	0	0	0	0	1	1	0	0	0	0	1	1	0	1.5	1.5	1.5	144.65	1259	1259;1457;1495	0	68.254				By MS/MS	By MS/MS		0	0	0	1.5	1.5	0
Q5VZL5-3;Q5VZL5-2;Q5VZL5-4;Q5VZL5	Q5VZL5-3;Q5VZL5-2;Q5VZL5-4;Q5VZL5	3;3;3;3	3;3;3;3	3;3;3;3	Zinc finger MYM-type protein 4	ZMYM4	Isoform 3 of Zinc finger MYM-type protein 4 OS=Homo sapiens GN=ZMYM4;Isoform 2 of Zinc finger MYM-type protein 4 OS=Homo sapiens GN=ZMYM4;Isoform 4 of Zinc finger MYM-type protein 4 OS=Homo sapiens GN=ZMYM4;Zinc finger MYM-type protein 4 OS=Homo sapiens GN	4	3	3	3	0	0	0	2	2	0	0	0	0	2	2	0	0	0	0	2	2	0	3.9	3.9	3.9	136.33	1224	1224;1459;1516;1548	0	8.2447				By MS/MS	By MS/MS		0	0	0	2.8	2.9	0
Q63HN8-4;Q63HN8;Q63HN8-5	Q63HN8-4;Q63HN8	6;6;2	6;6;2	6;6;2	E3 ubiquitin-protein ligase RNF213	RNF213	Isoform 2 of E3 ubiquitin-protein ligase RNF213 OS=Homo sapiens GN=RNF213;E3 ubiquitin-protein ligase RNF213 OS=Homo sapiens GN=RNF213 PE=1 SV=3	3	6	6	6	0	3	0	5	5	1	0	3	0	5	5	1	0	3	0	5	5	1	1.4	1.4	1.4	596.48	5256	5256;5207;1063	0	13.849		By MS/MS		By MS/MS	By MS/MS	By MS/MS	0	0.6	0	1.2	1.2	0.2
Q66K14-2;Q66K14	Q66K14-2;Q66K14	2;2	2;2	2;2	TBC1 domain family member 9B	TBC1D9B	Isoform 2 of TBC1 domain family member 9B OS=Homo sapiens GN=TBC1D9B;TBC1 domain family member 9B OS=Homo sapiens GN=TBC1D9B PE=1 SV=3	2	2	2	2	0	0	0	0	2	0	0	0	0	0	2	0	0	0	0	0	2	0	2.8	2.8	2.8	138.67	1233	1233;1250	0	17.578					By MS/MS		0	0	0	0	2.8	0
Q66PJ3;Q66PJ3-3;Q66PJ3-2;Q66PJ3-4;Q66PJ3-5;Q66PJ3-6	Q66PJ3;Q66PJ3-3;Q66PJ3-2;Q66PJ3-4;Q66PJ3-5	8;6;6;5;4;2	8;6;6;5;4;2	4;2;2;2;2;2	ADP-ribosylation factor-like protein 6-interacting protein 4	ARL6IP4	ADP-ribosylation factor-like protein 6-interacting protein 4 OS=Homo sapiens GN=ARL6IP4 PE=1 SV=2;Isoform 3 of ADP-ribosylation factor-like protein 6-interacting protein 4 OS=Homo sapiens GN=ARL6IP4;Isoform 2 of ADP-ribosylation factor-like protein 6-inter	6	8	8	4	5	5	5	3	4	8	5	5	5	3	4	8	3	3	3	2	2	4	21.1	21.1	11.9	44.915	421	421;402;413;399;365;276	0	256.54	By MS/MS	By MS/MS	By MS/MS	By MS/MS	By MS/MS	By MS/MS	12.6	12.4	12.4	8.3	8.8	21.1
Q66PJ3-7	Q66PJ3-7	5	1	1	ADP-ribosylation factor-like protein 6-interacting protein 4	ARL6IP4	Isoform 7 of ADP-ribosylation factor-like protein 6-interacting protein 4 OS=Homo sapiens GN=ARL6IP4	1	5	1	1	3	3	3	2	3	5	1	1	1	1	1	1	1	1	1	1	1	1	25.2	8	8	25.348	226	226	0	38.846	By MS/MS	By MS/MS	By MS/MS	By MS/MS	By matching	By MS/MS	15.9	15.9	15.9	15	15.9	25.2
Q68CQ4	Q68CQ4	3	3	3	Digestive organ expansion factor homolog	DIEXF	Digestive organ expansion factor homolog OS=Homo sapiens GN=DIEXF PE=1 SV=2	1	3	3	3	2	2	3	3	3	2	2	2	3	3	3	2	2	2	3	3	3	2	4.2	4.2	4.2	87.054	756	756	0	8.4203	By MS/MS	By MS/MS	By MS/MS	By MS/MS	By MS/MS	By MS/MS	2.8	2.8	4.2	4.2	4.2	2.8
Q68CZ2-2;Q68CZ2	Q68CZ2-2;Q68CZ2	1;1	1;1	1;1	Tensin-3	TNS3	Isoform 2 of Tensin-3 OS=Homo sapiens GN=TNS3;Tensin-3 OS=Homo sapiens GN=TNS3 PE=1 SV=2	2	1	1	1	0	1	0	1	1	0	0	1	0	1	1	0	0	1	0	1	1	0	1.2	1.2	1.2	129.06	1205	1205;1445	0.0007446	2.2791		By matching		By MS/MS	By MS/MS		0	1.2	0	1.2	1.2	0
Q68D10;Q68D10-2;Q68D10-3	Q68D10;Q68D10-2	11;11;3	11;11;3	11;11;3	Protein SPT2 homolog	SPTY2D1	Protein SPT2 homolog OS=Homo sapiens GN=SPTY2D1 PE=1 SV=3;Isoform 2 of Protein SPT2 homolog OS=Homo sapiens GN=SPTY2D1	3	11	11	11	9	9	8	4	4	11	9	9	8	4	4	11	9	9	8	4	4	11	17.4	17.4	17.4	75.598	685	685;673;351	0	63.276	By MS/MS	By MS/MS	By MS/MS	By MS/MS	By MS/MS	By MS/MS	14.9	17.4	14.9	9.1	9.1	17.4
Q69YN4-4;Q69YN4-2;Q69YN4-3;Q69YN4	Q69YN4-4;Q69YN4-2;Q69YN4-3;Q69YN4	1;1;1;1	1;1;1;1	1;1;1;1	Protein virilizer homolog	KIAA1429	Isoform 4 of Protein virilizer homolog OS=Homo sapiens GN=VIRMA;Isoform 2 of Protein virilizer homolog OS=Homo sapiens GN=VIRMA;Isoform 3 of Protein virilizer homolog OS=Homo sapiens GN=VIRMA;Protein virilizer homolog OS=Homo sapiens GN=VIRMA PE=1 SV=2	4	1	1	1	0	0	0	0	1	0	0	0	0	0	1	0	0	0	0	0	1	0	1.5	1.5	1.5	128.73	1147	1147;1377;1797;1812	0	13.504					By MS/MS		0	0	0	0	1.5	0
Q69YQ0-2;Q69YQ0	Q69YQ0-2;Q69YQ0	1;1	1;1	1;1	Cytospin-A	SPECC1L	Isoform 2 of Cytospin-A OS=Homo sapiens GN=SPECC1L;Cytospin-A OS=Homo sapiens GN=SPECC1L PE=1 SV=2	2	1	1	1	0	1	1	0	0	1	0	1	1	0	0	1	0	1	1	0	0	1	1.9	1.9	1.9	120.18	1078	1078;1117	0	7.3565		By MS/MS	By matching			By matching	0	1.9	1.9	0	0	1.9
Q6IEG0;Q6IEG0-2	Q6IEG0	3;1	3;1	3;1	U11/U12 small nuclear ribonucleoprotein 48 kDa protein	SNRNP48	U11/U12 small nuclear ribonucleoprotein 48 kDa protein OS=Homo sapiens GN=SNRNP48 PE=1 SV=2	2	3	3	3	0	3	3	0	0	3	0	3	3	0	0	3	0	3	3	0	0	3	9.1	9.1	9.1	39.965	339	339;147	0	4.2528		By MS/MS	By MS/MS			By MS/MS	0	9.1	9.1	0	0	9.1
Q6IQ21	Q6IQ21	1	1	1	Zinc finger protein 770	ZNF770	Zinc finger protein 770 OS=Homo sapiens GN=ZNF770 PE=1 SV=1	1	1	1	1	0	0	0	1	1	0	0	0	0	1	1	0	0	0	0	1	1	0	2.3	2.3	2.3	80.006	691	691	0	37.945				By matching	By MS/MS		0	0	0	2.3	2.3	0
Q6IQ22	Q6IQ22	2	2	2	Ras-related protein Rab-12	RAB12	Ras-related protein Rab-12 OS=Homo sapiens GN=RAB12 PE=1 SV=3	1	2	2	2	0	0	0	1	2	0	0	0	0	1	2	0	0	0	0	1	2	0	12.7	12.7	12.7	27.248	244	244	0	3.6738				By MS/MS	By MS/MS		0	0	0	8.2	12.7	0
Q6KC79;Q6KC79-2;Q6KC79-3	Q6KC79;Q6KC79-2;Q6KC79-3	9;9;7	9;9;7	9;9;7	Nipped-B-like protein	NIPBL	Nipped-B-like protein OS=Homo sapiens GN=NIPBL PE=1 SV=2;Isoform 2 of Nipped-B-like protein OS=Homo sapiens GN=NIPBL;Isoform 3 of Nipped-B-like protein OS=Homo sapiens GN=NIPBL	3	9	9	9	3	7	6	5	7	5	3	7	6	5	7	5	3	7	6	5	7	5	3.9	3.9	3.9	316.05	2804	2804;2697;1101	0	36.531	By MS/MS	By MS/MS	By MS/MS	By MS/MS	By MS/MS	By MS/MS	1.5	3.2	2.5	2.4	3.1	2.2
Q6NUK4-2;Q6NUK4	Q6NUK4-2;Q6NUK4	1;1	1;1	1;1	Receptor expression-enhancing protein 3	REEP3	Isoform 2 of Receptor expression-enhancing protein 3 OS=Homo sapiens GN=REEP3;Receptor expression-enhancing protein 3 OS=Homo sapiens GN=REEP3 PE=1 SV=1	2	1	1	1	0	0	0	1	1	0	0	0	0	1	1	0	0	0	0	1	1	0	6.8	6.8	6.8	16.999	146	146;255	0.0013996	1.9326				By MS/MS	By MS/MS		0	0	0	6.8	6.8	0
Q6NUQ4-2;Q6NUQ4	Q6NUQ4-2;Q6NUQ4	3;3	3;3	3;3	Transmembrane protein 214	TMEM214	Isoform 2 of Transmembrane protein 214 OS=Homo sapiens GN=TMEM214;Transmembrane protein 214 OS=Homo sapiens GN=TMEM214 PE=1 SV=2	2	3	3	3	0	0	0	3	2	0	0	0	0	3	2	0	0	0	0	3	2	0	6.2	6.2	6.2	72.039	644	644;689	0	3.3025				By MS/MS	By MS/MS		0	0	0	6.2	4.8	0
Q6NW34-2;Q6NW34	Q6NW34-2;Q6NW34	2;2	2;2	2;2	Uncharacterized protein C3orf17	C3orf17	Isoform 2 of Nucleolus and neural progenitor protein OS=Homo sapiens GN=NEPRO;Nucleolus and neural progenitor protein OS=Homo sapiens GN=NEPRO PE=1 SV=3	2	2	2	2	0	1	1	2	2	0	0	1	1	2	2	0	0	1	1	2	2	0	4.8	4.8	4.8	56.748	497	497;567	0	5.1858		By MS/MS	By matching	By MS/MS	By MS/MS		0	2.8	2.8	4.8	4.8	0
Q6NXR4	Q6NXR4	1	1	1	TELO2-interacting protein 2	TTI2	TELO2-interacting protein 2 OS=Homo sapiens GN=TTI2 PE=1 SV=1	1	1	1	1	0	0	0	1	1	0	0	0	0	1	1	0	0	0	0	1	1	0	4.1	4.1	4.1	56.914	508	508	0	4.2156				By MS/MS	By MS/MS		0	0	0	4.1	4.1	0
Q6NYC1-3;Q6NYC1;Q6NYC1-2	Q6NYC1-3;Q6NYC1;Q6NYC1-2	2;2;1	2;2;1	2;2;1	Bifunctional arginine demethylase and lysyl-hydroxylase JMJD6	JMJD6	Isoform 3 of Bifunctional arginine demethylase and lysyl-hydroxylase JMJD6 OS=Homo sapiens GN=JMJD6;Bifunctional arginine demethylase and lysyl-hydroxylase JMJD6 OS=Homo sapiens GN=JMJD6 PE=1 SV=1;Isoform 2 of Bifunctional arginine demethylase and lysyl-hy	3	2	2	2	1	1	1	1	1	2	1	1	1	1	1	2	1	1	1	1	1	2	7.2	7.2	7.2	47.626	414	414;403;372	0	17.739	By MS/MS	By MS/MS	By MS/MS	By matching	By matching	By MS/MS	2.7	2.7	2.7	2.7	2.7	7.2
Q6P0N0	Q6P0N0	1	1	1	Mis18-binding protein 1	MIS18BP1	Mis18-binding protein 1 OS=Homo sapiens GN=MIS18BP1 PE=1 SV=1	1	1	1	1	1	1	1	1	1	1	1	1	1	1	1	1	1	1	1	1	1	1	1.1	1.1	1.1	129.08	1132	1132	0	2.6005	By MS/MS	By MS/MS	By MS/MS	By MS/MS	By MS/MS	By matching	1.1	1.1	1.1	1.1	1.1	1.1
Q6P158	Q6P158	4	4	4	Putative ATP-dependent RNA helicase DHX57	DHX57	Putative ATP-dependent RNA helicase DHX57 OS=Homo sapiens GN=DHX57 PE=1 SV=2	1	4	4	4	0	0	0	3	3	0	0	0	0	3	3	0	0	0	0	3	3	0	3.8	3.8	3.8	155.6	1386	1386	0	124.84				By MS/MS	By MS/MS		0	0	0	3.1	3	0
Q6P1J9	Q6P1J9	2	2	2	Parafibromin	CDC73	Parafibromin OS=Homo sapiens GN=CDC73 PE=1 SV=1	1	2	2	2	0	0	0	1	2	0	0	0	0	1	2	0	0	0	0	1	2	0	3.8	3.8	3.8	60.576	531	531	0.0046885	1.6784				By matching	By MS/MS		0	0	0	1.9	3.8	0
Q6P1M0-2;Q6P1M0	Q6P1M0-2;Q6P1M0	1;1	1;1	1;1	Long-chain fatty acid transport protein 4	SLC27A4	Isoform 2 of Long-chain fatty acid transport protein 4 OS=Homo sapiens GN=SLC27A4;Long-chain fatty acid transport protein 4 OS=Homo sapiens GN=SLC27A4 PE=1 SV=1	2	1	1	1	0	0	0	1	1	0	0	0	0	1	1	0	0	0	0	1	1	0	7.2	7.2	7.2	26	237	237;643	0	3.2378				By MS/MS	By MS/MS		0	0	0	7.2	7.2	0
Q6P1N0-2;Q6P1N0	Q6P1N0-2;Q6P1N0	1;1	1;1	1;1	Coiled-coil and C2 domain-containing protein 1A	CC2D1A	Isoform 2 of Coiled-coil and C2 domain-containing protein 1A OS=Homo sapiens GN=CC2D1A;Coiled-coil and C2 domain-containing protein 1A OS=Homo sapiens GN=CC2D1A PE=1 SV=1	2	1	1	1	0	0	0	1	1	0	0	0	0	1	1	0	0	0	0	1	1	0	1.9	1.9	1.9	103.93	950	950;951	0.0013918	1.8809				By MS/MS	By MS/MS		0	0	0	1.9	1.9	0
Q6P2Q9	Q6P2Q9	5	5	5	Pre-mRNA-processing-splicing factor 8	PRPF8	Pre-mRNA-processing-splicing factor 8 OS=Homo sapiens GN=PRPF8 PE=1 SV=2	1	5	5	5	1	1	2	5	5	2	1	1	2	5	5	2	1	1	2	5	5	2	2.3	2.3	2.3	273.6	2335	2335	0	29.049	By matching	By matching	By MS/MS	By MS/MS	By MS/MS	By MS/MS	0.5	0.5	0.8	2.3	2.3	0.8
Q6P4A7-2;Q6P4A7	Q6P4A7-2;Q6P4A7	2;2	2;2	2;2	Sideroflexin-4	SFXN4	Isoform 2 of Sideroflexin-4 OS=Homo sapiens GN=SFXN4;Sideroflexin-4 OS=Homo sapiens GN=SFXN4 PE=1 SV=1	2	2	2	2	0	0	0	2	2	0	0	0	0	2	2	0	0	0	0	2	2	0	9.8	9.8	9.8	34.104	305	305;337	0	54.625				By MS/MS	By MS/MS		0	0	0	9.8	9.8	0
Q6P9B9	Q6P9B9	1	1	1	Integrator complex subunit 5	INTS5	Integrator complex subunit 5 OS=Homo sapiens GN=INTS5 PE=1 SV=1	1	1	1	1	0	0	0	1	1	0	0	0	0	1	1	0	0	0	0	1	1	0	1.6	1.6	1.6	107.99	1019	1019	0	7.8311				By MS/MS	By MS/MS		0	0	0	1.6	1.6	0
Q6PCB5	Q6PCB5	1	1	1	Round spermatid basic protein 1-like protein	RSBN1L	Round spermatid basic protein 1-like protein OS=Homo sapiens GN=RSBN1L PE=1 SV=2	1	1	1	1	1	1	1	0	1	1	1	1	1	0	1	1	1	1	1	0	1	1	1.1	1.1	1.1	94.868	846	846	0.0014104	1.9792	By MS/MS	By MS/MS	By MS/MS		By matching	By MS/MS	1.1	1.1	1.1	0	1.1	1.1
Q6PCT2-2;Q6PCT2;Q6PCT2-3	Q6PCT2-2;Q6PCT2;Q6PCT2-3	2;2;1	2;2;1	2;2;1	F-box/LRR-repeat protein 19	FBXL19	Isoform 2 of F-box/LRR-repeat protein 19 OS=Homo sapiens GN=FBXL19;F-box/LRR-repeat protein 19 OS=Homo sapiens GN=FBXL19 PE=1 SV=3;Isoform 3 of F-box/LRR-repeat protein 19 OS=Homo sapiens GN=FBXL19	3	2	2	2	0	1	2	0	0	2	0	1	2	0	0	2	0	1	2	0	0	2	3.7	3.7	3.7	71.329	651	651;694;665	0.0059094	1.5804		By MS/MS	By MS/MS			By MS/MS	0	2	3.7	0	0	3.7
Q6PD62	Q6PD62	2	2	2	RNA polymerase-associated protein CTR9 homolog	CTR9	RNA polymerase-associated protein CTR9 homolog OS=Homo sapiens GN=CTR9 PE=1 SV=1	1	2	2	2	1	1	2	1	0	1	1	1	2	1	0	1	1	1	2	1	0	1	1.9	1.9	1.9	133.5	1173	1173	0	4.722	By MS/MS	By MS/MS	By MS/MS	By MS/MS		By MS/MS	0.9	0.9	1.9	0.9	0	0.9
Q6PGP7	Q6PGP7	2	2	2	Tetratricopeptide repeat protein 37	TTC37	Tetratricopeptide repeat protein 37 OS=Homo sapiens GN=TTC37 PE=1 SV=1	1	2	2	2	0	0	0	2	1	0	0	0	0	2	1	0	0	0	0	2	1	0	1.3	1.3	1.3	175.48	1564	1564	0	6.9206				By MS/MS	By MS/MS		0	0	0	1.3	0.6	0
Q6PH81-2;Q6PH81	Q6PH81-2;Q6PH81	1;1	1;1	1;1	UPF0547 protein C16orf87	C16orf87	Isoform 2 of UPF0547 protein C16orf87 OS=Homo sapiens GN=C16orf87;UPF0547 protein C16orf87 OS=Homo sapiens GN=C16orf87 PE=1 SV=1	2	1	1	1	1	1	1	0	0	1	1	1	1	0	0	1	1	1	1	0	0	1	15.1	15.1	15.1	10.431	93	93;154	0	4.9153	By MS/MS	By MS/MS	By MS/MS			By MS/MS	15.1	15.1	15.1	0	0	15.1
Q6PIU2-2;Q6PIU2;Q6PIU2-3	Q6PIU2-2;Q6PIU2;Q6PIU2-3	2;2;1	2;2;1	2;2;1	Neutral cholesterol ester hydrolase 1	NCEH1	Isoform 2 of Neutral cholesterol ester hydrolase 1 OS=Homo sapiens GN=NCEH1;Neutral cholesterol ester hydrolase 1 OS=Homo sapiens GN=NCEH1 PE=1 SV=3;Isoform 3 of Neutral cholesterol ester hydrolase 1 OS=Homo sapiens GN=NCEH1	3	2	2	2	1	0	1	2	2	1	1	0	1	2	2	1	1	0	1	2	2	1	6	6	6	46.626	416	416;408;275	0	10.213	By matching		By matching	By MS/MS	By MS/MS	By matching	2.9	0	2.9	6	6	2.9
Q6PIW4-2;Q6PIW4	Q6PIW4-2;Q6PIW4	2;2	2;2	2;2	Fidgetin-like protein 1	FIGNL1	Isoform 2 of Fidgetin-like protein 1 OS=Homo sapiens GN=FIGNL1;Fidgetin-like protein 1 OS=Homo sapiens GN=FIGNL1 PE=1 SV=2	2	2	2	2	0	0	0	2	1	0	0	0	0	2	1	0	0	0	0	2	1	0	5.5	5.5	5.5	61.686	563	563;674	0	4.1201				By MS/MS	By MS/MS		0	0	0	5.5	2.8	0
Q6PJG2	Q6PJG2	2	2	2	ELM2 and SANT domain-containing protein 1	ELMSAN1	ELM2 and SANT domain-containing protein 1 OS=Homo sapiens GN=ELMSAN1 PE=1 SV=2	1	2	2	2	0	0	0	1	1	1	0	0	0	1	1	1	0	0	0	1	1	1	3.2	3.2	3.2	114.99	1045	1045	0	4.115				By MS/MS	By matching	By MS/MS	0	0	0	1.3	1.8	1.8
Q6PJG6;Q6PJG6-2;Q6PJG6-3	Q6PJG6;Q6PJG6-2;Q6PJG6-3	2;1;1	2;1;1	2;1;1	BRCA1-associated ATM activator 1	BRAT1	BRCA1-associated ATM activator 1 OS=Homo sapiens GN=BRAT1 PE=1 SV=2;Isoform 2 of BRCA1-associated ATM activator 1 OS=Homo sapiens GN=BRAT1;Isoform 3 of BRCA1-associated ATM activator 1 OS=Homo sapiens GN=BRAT1	3	2	2	2	0	0	0	2	1	0	0	0	0	2	1	0	0	0	0	2	1	0	4.1	4.1	4.1	88.118	821	821;286;291	0	8.834				By MS/MS	By MS/MS		0	0	0	4.1	1.7	0
Q6PJT7-10;Q6PJT7-4;Q6PJT7-3;Q6PJT7-5;Q6PJT7-9;Q6PJT7-2;Q6PJT7	Q6PJT7-10;Q6PJT7-4;Q6PJT7-3;Q6PJT7-5;Q6PJT7-9;Q6PJT7-2;Q6PJT7	1;1;1;1;1;1;1	1;1;1;1;1;1;1	1;1;1;1;1;1;1	Zinc finger CCCH domain-containing protein 14	ZC3H14	Isoform 10 of Zinc finger CCCH domain-containing protein 14 OS=Homo sapiens GN=ZC3H14;Isoform 4 of Zinc finger CCCH domain-containing protein 14 OS=Homo sapiens GN=ZC3H14;Isoform 3 of Zinc finger CCCH domain-containing protein 14 OS=Homo sapiens GN=ZC3H14;	7	1	1	1	0	0	0	1	1	0	0	0	0	1	1	0	0	0	0	1	1	0	2.8	2.8	2.8	61.354	543	543;571;579;711;730;735;736	0.00073046	2.1726				By MS/MS	By MS/MS		0	0	0	2.8	2.8	0
Q6PK04	Q6PK04	5	5	5	Coiled-coil domain-containing protein 137	CCDC137	Coiled-coil domain-containing protein 137 OS=Homo sapiens GN=CCDC137 PE=1 SV=1	1	5	5	5	2	4	3	0	2	5	2	4	3	0	2	5	2	4	3	0	2	5	15.2	15.2	15.2	33.231	289	289	0	7.888	By MS/MS	By MS/MS	By MS/MS		By matching	By MS/MS	6.6	13.8	9.3	0	6.6	15.2
Q6UB98-2;Q6UB98	Q6UB98-2;Q6UB98	1;1	1;1	1;1	Ankyrin repeat domain-containing protein 12	ANKRD12	Isoform 2 of Ankyrin repeat domain-containing protein 12 OS=Homo sapiens GN=ANKRD12;Ankyrin repeat domain-containing protein 12 OS=Homo sapiens GN=ANKRD12 PE=1 SV=3	2	1	1	1	0	0	0	0	0	1	0	0	0	0	0	1	0	0	0	0	0	1	0.8	0.8	0.8	233.01	2039	2039;2062	0	2.7909						By MS/MS	0	0	0	0	0	0.8
Q6UB99	Q6UB99	6	6	6	Ankyrin repeat domain-containing protein 11	ANKRD11	Ankyrin repeat domain-containing protein 11 OS=Homo sapiens GN=ANKRD11 PE=1 SV=3	1	6	6	6	3	3	5	2	2	4	3	3	5	2	2	4	3	3	5	2	2	4	2.3	2.3	2.3	297.91	2663	2663	0	11.914	By MS/MS	By MS/MS	By MS/MS	By MS/MS	By MS/MS	By MS/MS	1.1	1.1	1.9	0.8	0.8	1.4
Q6UN15-3;Q6UN15-5;Q6UN15;Q6UN15-4	Q6UN15-3;Q6UN15-5;Q6UN15;Q6UN15-4	9;9;9;6	9;9;9;6	9;9;9;6	Pre-mRNA 3-end-processing factor FIP1	FIP1L1	Isoform 3 of Pre-mRNA 3-end-processing factor FIP1 OS=Homo sapiens GN=FIP1L1;Isoform 5 of Pre-mRNA 3-end-processing factor FIP1 OS=Homo sapiens GN=FIP1L1;Pre-mRNA 3-end-processing factor FIP1 OS=Homo sapiens GN=FIP1L1 PE=1 SV=1;Isoform 4 of Pre-mRNA 3-	4	9	9	9	7	8	9	3	3	9	7	8	9	3	3	9	7	8	9	3	3	9	19.6	19.6	19.6	58.375	520	520;588;594;378	0	239.6	By MS/MS	By MS/MS	By MS/MS	By MS/MS	By MS/MS	By MS/MS	16.2	18.3	19.6	8.5	8.5	19.6
Q6WCQ1-3;Q6WCQ1;Q6WCQ1-2	Q6WCQ1-3;Q6WCQ1;Q6WCQ1-2	3;3;3	3;3;3	2;2;2	Myosin phosphatase Rho-interacting protein	MPRIP	Isoform 3 of Myosin phosphatase Rho-interacting protein OS=Homo sapiens GN=MPRIP;Myosin phosphatase Rho-interacting protein OS=Homo sapiens GN=MPRIP PE=1 SV=3;Isoform 2 of Myosin phosphatase Rho-interacting protein OS=Homo sapiens GN=MPRIP	3	3	3	2	0	0	0	2	2	0	0	0	0	2	2	0	0	0	0	2	2	0	3.5	3.5	2.5	114.05	1000	1000;1025;1038	0	5.0858				By MS/MS	By MS/MS		0	0	0	2.5	2.5	0
Q6Y1H2	Q6Y1H2	1	1	1	Very-long-chain (3R)-3-hydroxyacyl-CoA dehydratase 2	HACD2	Very-long-chain (3R)-3-hydroxyacyl-CoA dehydratase 2 OS=Homo sapiens GN=HACD2 PE=1 SV=1	1	1	1	1	0	1	0	0	0	0	0	1	0	0	0	0	0	1	0	0	0	0	3.9	3.9	3.9	28.368	254	254	0.0083979	1.4715		By MS/MS					0	3.9	0	0	0	0
Q6Y7W6-4;Q6Y7W6-5;Q6Y7W6;Q6Y7W6-3	Q6Y7W6-4;Q6Y7W6-5;Q6Y7W6;Q6Y7W6-3	1;1;1;1	1;1;1;1	1;1;1;1	PERQ amino acid-rich with GYF domain-containing protein 2	GIGYF2	Isoform 3 of GRB10-interacting GYF protein 2 OS=Homo sapiens GN=GIGYF2;Isoform 4 of GRB10-interacting GYF protein 2 OS=Homo sapiens GN=GIGYF2;GRB10-interacting GYF protein 2 OS=Homo sapiens GN=GIGYF2 PE=1 SV=1;Isoform 2 of GRB10-interacting GYF protein 2 O	4	1	1	1	0	0	0	1	1	0	0	0	0	1	1	0	0	0	0	1	1	0	0.9	0.9	0.9	148.63	1286	1286;1293;1299;1320	0.00072993	2.1692				By MS/MS	By MS/MS		0	0	0	0.9	0.9	0
Q6YHU6-2;Q6YHU6-3;Q6YHU6;Q6YHU6-6;Q6YHU6-5	Q6YHU6-2;Q6YHU6-3;Q6YHU6;Q6YHU6-6;Q6YHU6-5	2;2;2;1;1	2;2;2;1;1	2;2;2;1;1	Thyroid adenoma-associated protein	THADA	Isoform 2 of Thyroid adenoma-associated protein OS=Homo sapiens GN=THADA;Isoform 3 of Thyroid adenoma-associated protein OS=Homo sapiens GN=THADA;Thyroid adenoma-associated protein OS=Homo sapiens GN=THADA PE=1 SV=1;Isoform 6 of Thyroid adenoma-associated	5	2	2	2	0	0	0	2	2	0	0	0	0	2	2	0	0	0	0	2	2	0	1.6	1.6	1.6	183.44	1632	1632;1879;1953;894;937	0	64.419				By MS/MS	By MS/MS		0	0	0	1.6	1.6	0
Q6ZMS7;Q6ZMS7-2	Q6ZMS7;Q6ZMS7-2	1;1	1;1	1;1	Protein ZNF783	ZNF783	Protein ZNF783 OS=Homo sapiens GN=ZNF783 PE=1 SV=1;Isoform 2 of Protein ZNF783 OS=Homo sapiens GN=ZNF783	2	1	1	1	1	0	0	0	0	1	1	0	0	0	0	1	1	0	0	0	0	1	5	5	5	31.422	281	281;546	1	-2	By matching					By MS/MS	5	0	0	0	0	5
Q6ZNB6;Q6ZNB6-2	Q6ZNB6;Q6ZNB6-2	9;8	9;8	9;8	NF-X1-type zinc finger protein NFXL1	NFXL1	NF-X1-type zinc finger protein NFXL1 OS=Homo sapiens GN=NFXL1 PE=1 SV=2;Isoform 2 of NF-X1-type zinc finger protein NFXL1 OS=Homo sapiens GN=NFXL1	2	9	9	9	2	5	6	4	5	8	2	5	6	4	5	8	2	5	6	4	5	8	13.5	13.5	13.5	101.34	911	911;733	0	83.209	By matching	By MS/MS	By MS/MS	By MS/MS	By MS/MS	By MS/MS	2.7	8.5	9.9	7	7	13.3
Q6ZNJ1-2;Q6ZNJ1-3;Q6ZNJ1	Q6ZNJ1-2;Q6ZNJ1-3;Q6ZNJ1	2;2;2	2;2;2	2;2;2	Neurobeachin-like protein 2	NBEAL2	Isoform 2 of Neurobeachin-like protein 2 OS=Homo sapiens GN=NBEAL2;Isoform 3 of Neurobeachin-like protein 2 OS=Homo sapiens GN=NBEAL2;Neurobeachin-like protein 2 OS=Homo sapiens GN=NBEAL2 PE=1 SV=2	3	2	2	2	0	0	0	2	2	0	0	0	0	2	2	0	0	0	0	2	2	0	1.2	1.2	1.2	282.86	2570	2570;2724;2754	0	75.235				By MS/MS	By MS/MS		0	0	0	1.2	1.2	0
Q6ZQQ6;Q6ZQQ6-2	Q6ZQQ6;Q6ZQQ6-2	2;2	2;2	2;2	WD repeat-containing protein 87	WDR87	WD repeat-containing protein 87 OS=Homo sapiens GN=WDR87 PE=1 SV=3;Isoform 2 of WD repeat-containing protein 87 OS=Homo sapiens GN=WDR87	2	2	2	2	0	2	1	0	1	0	0	2	1	0	1	0	0	2	1	0	1	0	0.8	0.8	0.8	333.18	2873	2873;2912	0.0020733	1.8469		By MS/MS	By matching		By MS/MS		0	0.8	0.3	0	0.5	0
Q6ZS17-2;Q6ZS17;Q6ZS17-3;Q6ZS17-4	Q6ZS17-2;Q6ZS17;Q6ZS17-3;Q6ZS17-4	1;1;1;1	1;1;1;1	1;1;1;1	Protein FAM65A	FAM65A	Isoform 2 of Rho family-interacting cell polarization regulator 1 OS=Homo sapiens GN=RIPOR1;Rho family-interacting cell polarization regulator 1 OS=Homo sapiens GN=RIPOR1 PE=1 SV=1;Isoform 3 of Rho family-interacting cell polarization regulator 1 OS=Homo s	4	1	1	1	0	0	0	1	1	0	0	0	0	1	1	0	0	0	0	1	1	0	1	1	1	131.87	1219	1219;1223;1233;1239	0	2.5776				By MS/MS	By MS/MS		0	0	0	1	1	0
Q6ZUT1-3;Q6ZUT1;Q6ZUT1-2	Q6ZUT1-3;Q6ZUT1;Q6ZUT1-2	3;3;3	3;3;3	3;3;3	Uncharacterized protein C11orf57	C11orf57	Isoform 3 of Uncharacterized protein NKAPD1 OS=Homo sapiens GN=NKAPD1;Uncharacterized protein NKAPD1 OS=Homo sapiens GN=NKAPD1 PE=1 SV=2;Isoform 2 of Uncharacterized protein NKAPD1 OS=Homo sapiens GN=NKAPD1	3	3	3	3	3	1	2	2	1	2	3	1	2	2	1	2	3	1	2	2	1	2	14	14	14	30.844	264	264;292;293	0	6.2028	By MS/MS	By MS/MS	By matching	By MS/MS	By MS/MS	By MS/MS	14	3.8	9.1	9.1	5.3	9.1
Q6ZW31-2;Q6ZW31	Q6ZW31-2;Q6ZW31	1;1	1;1	1;1	Rho GTPase-activating protein SYDE1	SYDE1	Isoform 2 of Rho GTPase-activating protein SYDE1 OS=Homo sapiens GN=SYDE1;Rho GTPase-activating protein SYDE1 OS=Homo sapiens GN=SYDE1 PE=1 SV=1	2	1	1	1	0	0	0	1	1	0	0	0	0	1	1	0	0	0	0	1	1	0	2.4	2.4	2.4	72.91	668	668;735	0	19.167				By MS/MS	By MS/MS		0	0	0	2.4	2.4	0
Q6ZXV5-2;Q6ZXV5	Q6ZXV5-2;Q6ZXV5	2;2	2;2	2;2	Transmembrane and TPR repeat-containing protein 3	TMTC3	Isoform 2 of Transmembrane and TPR repeat-containing protein 3 OS=Homo sapiens GN=TMTC3;Transmembrane and TPR repeat-containing protein 3 OS=Homo sapiens GN=TMTC3 PE=1 SV=2	2	2	2	2	0	0	0	2	1	0	0	0	0	2	1	0	0	0	0	2	1	0	2.7	2.7	2.7	103.88	914	914;915	0	4.5356				By MS/MS	By MS/MS		0	0	0	2.7	1.4	0
Q70CQ2;Q70CQ2-3;Q70CQ2-2	Q70CQ2;Q70CQ2-3;Q70CQ2-2	3;2;2	3;2;2	3;2;2	Ubiquitin carboxyl-terminal hydrolase 34	USP34	Ubiquitin carboxyl-terminal hydrolase 34 OS=Homo sapiens GN=USP34 PE=1 SV=2;Isoform 3 of Ubiquitin carboxyl-terminal hydrolase 34 OS=Homo sapiens GN=USP34;Isoform 2 of Ubiquitin carboxyl-terminal hydrolase 34 OS=Homo sapiens GN=USP34	3	3	3	3	0	0	0	3	2	0	0	0	0	3	2	0	0	0	0	3	2	0	0.9	0.9	0.9	404.23	3546	3546;3312;3395	0	4.9678				By MS/MS	By MS/MS		0	0	0	0.9	0.6	0
Q70E73	Q70E73	1	1	1	Ras-associated and pleckstrin homology domains-containing protein 1	RAPH1	Ras-associated and pleckstrin homology domains-containing protein 1 OS=Homo sapiens GN=RAPH1 PE=1 SV=3	1	1	1	1	1	0	0	0	0	1	1	0	0	0	0	1	1	0	0	0	0	1	1	1	1	135.25	1250	1250	0	2.5909	By MS/MS					By MS/MS	1	0	0	0	0	1
Q96BA8-2;Q70SY1-2;Q96BA8;Q70SY1	Q96BA8-2;Q70SY1-2;Q96BA8;Q70SY1	1;1;1;1	1;1;1;1	1;1;1;1	Cyclic AMP-responsive element-binding protein 3-like protein 1;Processed cyclic AMP-responsive element-binding protein 3-like protein 1;Cyclic AMP-responsive element-binding protein 3-like protein 2;Processed cyclic AMP-responsive element-binding protein 3-like protein 2	CREB3L1;CREB3L2	Isoform 2 of Cyclic AMP-responsive element-binding protein 3-like protein 1 OS=Homo sapiens GN=CREB3L1;Isoform 2 of Cyclic AMP-responsive element-binding protein 3-like protein 2 OS=Homo sapiens GN=CREB3L2;Cyclic AMP-responsive element-binding protein 3-li	4	1	1	1	1	1	0	0	0	1	1	1	0	0	0	1	1	1	0	0	0	1	1.9	1.9	1.9	47.782	431	431;460;519;520	0.0083817	1.4631	By MS/MS	By MS/MS				By MS/MS	1.9	1.9	0	0	0	1.9
Q71F23-3;Q71F23	Q71F23-3;Q71F23	1;1	1;1	1;1	Centromere protein U	CENPU	Isoform 3 of Centromere protein U OS=Homo sapiens GN=CENPU;Centromere protein U OS=Homo sapiens GN=CENPU PE=1 SV=1	2	1	1	1	1	1	1	0	0	0	1	1	1	0	0	0	1	1	1	0	0	0	5.3	5.3	5.3	38.102	337	337;418	0	3.6404	By MS/MS	By MS/MS	By MS/MS				5.3	5.3	5.3	0	0	0
Q76FK4-2;Q76FK4-4;Q76FK4	Q76FK4-2;Q76FK4-4;Q76FK4	3;3;3	3;3;3	3;3;3	Nucleolar protein 8	NOL8	Isoform 2 of Nucleolar protein 8 OS=Homo sapiens GN=NOL8;Isoform 4 of Nucleolar protein 8 OS=Homo sapiens GN=NOL8;Nucleolar protein 8 OS=Homo sapiens GN=NOL8 PE=1 SV=1	3	3	3	3	0	2	2	2	2	0	0	2	2	2	2	0	0	2	2	2	2	0	3	3	3	123.93	1099	1099;1129;1167	0	5.3843		By MS/MS	By MS/MS	By MS/MS	By MS/MS		0	1.7	1.7	2.3	2.3	0
Q76M96;Q76M96-2	Q76M96;Q76M96-2	2;2	2;2	2;2	Coiled-coil domain-containing protein 80	CCDC80	Coiled-coil domain-containing protein 80 OS=Homo sapiens GN=CCDC80 PE=1 SV=1;Isoform 2 of Coiled-coil domain-containing protein 80 OS=Homo sapiens GN=CCDC80	2	2	2	2	0	1	2	1	0	2	0	1	2	1	0	2	0	1	2	1	0	2	4.1	4.1	4.1	108.17	950	950;961	0	4.8485		By matching	By MS/MS	By matching		By MS/MS	0	1.2	4.1	1.2	0	4.1
Q7KZF4	Q7KZF4	8	8	8	Staphylococcal nuclease domain-containing protein 1	SND1	Staphylococcal nuclease domain-containing protein 1 OS=Homo sapiens GN=SND1 PE=1 SV=1	1	8	8	8	0	1	1	8	6	1	0	1	1	8	6	1	0	1	1	8	6	1	11.9	11.9	11.9	102	910	910	0	27.989		By matching	By matching	By MS/MS	By MS/MS	By MS/MS	0	1.5	1.3	11.9	7.9	1.8
Q7KZI7-10;Q7KZI7-13;Q7KZI7-7;Q7KZI7-2;Q7KZI7-15;Q7KZI7-5;Q7KZI7-16;Q7KZI7-4;Q7KZI7-9;Q7KZI7-12;Q7KZI7-14;Q7KZI7-3;Q7KZI7-6;Q7KZI7-11;Q7KZI7-8;Q7KZI7	Q7KZI7-10;Q7KZI7-13;Q7KZI7-7;Q7KZI7-2;Q7KZI7-15;Q7KZI7-5;Q7KZI7-16;Q7KZI7-4;Q7KZI7-9;Q7KZI7-12;Q7KZI7-14;Q7KZI7-3;Q7KZI7-6;Q7KZI7-11;Q7KZI7-8;Q7KZI7	3;3;3;3;3;3;3;3;3;3;3;3;3;3;3;3	3;3;3;3;3;3;3;3;3;3;3;3;3;3;3;3	3;3;3;3;3;3;3;3;3;3;3;3;3;3;3;3	Serine/threonine-protein kinase MARK2	MARK2	Isoform 10 of Serine/threonine-protein kinase MARK2 OS=Homo sapiens GN=MARK2;Isoform 13 of Serine/threonine-protein kinase MARK2 OS=Homo sapiens GN=MARK2;Isoform 7 of Serine/threonine-protein kinase MARK2 OS=Homo sapiens GN=MARK2;Isoform 2 of Serine/threon	16	3	3	3	1	0	0	3	2	0	1	0	0	3	2	0	1	0	0	3	2	0	7.9	7.9	7.9	77.068	686	686;691;692;701;709;719;724;725;734;740;745;746;755;773;779;788	0	8.145	By matching			By MS/MS	By MS/MS		3.1	0	0	7.9	5.5	0
Q7L014	Q7L014	27	27	27	Probable ATP-dependent RNA helicase DDX46	DDX46	Probable ATP-dependent RNA helicase DDX46 OS=Homo sapiens GN=DDX46 PE=1 SV=2	1	27	27	27	16	17	15	6	7	23	16	17	15	6	7	23	16	17	15	6	7	23	23.6	23.6	23.6	117.36	1031	1031	0	130.87	By MS/MS	By MS/MS	By MS/MS	By MS/MS	By MS/MS	By MS/MS	14.2	15.8	14.5	5.9	6.4	19.6
Q7L0Y3	Q7L0Y3	1	1	1	Mitochondrial ribonuclease P protein 1	TRMT10C	tRNA methyltransferase 10 homolog C OS=Homo sapiens GN=TRMT10C PE=1 SV=2	1	1	1	1	0	0	0	1	0	0	0	0	0	1	0	0	0	0	0	1	0	0	2.7	2.7	2.7	47.346	403	403	0.0013976	1.9177				By MS/MS			0	0	0	2.7	0	0
Q7L2E3-2;Q7L2E3-3;Q7L2E3	Q7L2E3-2;Q7L2E3-3;Q7L2E3	14;13;13	14;13;13	14;13;13	Putative ATP-dependent RNA helicase DHX30	DHX30	Isoform 2 of Putative ATP-dependent RNA helicase DHX30 OS=Homo sapiens GN=DHX30;Isoform 3 of Putative ATP-dependent RNA helicase DHX30 OS=Homo sapiens GN=DHX30;Putative ATP-dependent RNA helicase DHX30 OS=Homo sapiens GN=DHX30 PE=1 SV=1	3	14	14	14	0	1	3	12	10	1	0	1	3	12	10	1	0	1	3	12	10	1	13.1	13.1	13.1	136.11	1222	1222;1155;1194	0	56.612		By MS/MS	By MS/MS	By MS/MS	By MS/MS	By matching	0	0.8	2.3	11.4	8.8	0.8
Q7L2J0	Q7L2J0	1	1	1	7SK snRNA methylphosphate capping enzyme	MEPCE	7SK snRNA methylphosphate capping enzyme OS=Homo sapiens GN=MEPCE PE=1 SV=1	1	1	1	1	0	0	0	1	1	0	0	0	0	1	1	0	0	0	0	1	1	0	2.8	2.8	2.8	74.354	689	689	0	6.6395				By matching	By MS/MS		0	0	0	2.8	2.8	0
Q7L4I2;Q7L4I2-2	Q7L4I2;Q7L4I2-2	10;8	10;8	10;8	Arginine/serine-rich coiled-coil protein 2	RSRC2	Arginine/serine-rich coiled-coil protein 2 OS=Homo sapiens GN=RSRC2 PE=1 SV=1;Isoform 2 of Arginine/serine-rich coiled-coil protein 2 OS=Homo sapiens GN=RSRC2	2	10	10	10	8	8	7	4	3	8	8	8	7	4	3	8	8	8	7	4	3	8	25.6	25.6	25.6	50.559	434	434;386	0	132.58	By MS/MS	By MS/MS	By MS/MS	By MS/MS	By matching	By MS/MS	22.4	20.7	14.7	11.8	8.8	20.5
Q7L576;Q7L576-3;Q7L576-2	Q7L576;Q7L576-3;Q7L576-2	8;5;5	8;5;5	4;3;3	Cytoplasmic FMR1-interacting protein 1	CYFIP1	Cytoplasmic FMR1-interacting protein 1 OS=Homo sapiens GN=CYFIP1 PE=1 SV=1;Isoform 3 of Cytoplasmic FMR1-interacting protein 1 OS=Homo sapiens GN=CYFIP1;Isoform 2 of Cytoplasmic FMR1-interacting protein 1 OS=Homo sapiens GN=CYFIP1	3	8	8	4	0	1	1	6	8	2	0	1	1	6	8	2	0	0	0	4	4	1	8.4	8.4	4.6	145.18	1253	1253;447;822	0	31.466		By matching	By MS/MS	By MS/MS	By MS/MS	By matching	0	0.9	0.9	6.5	8.4	1.9
Q7L5D6	Q7L5D6	1	1	1	Golgi to ER traffic protein 4 homolog	GET4	Golgi to ER traffic protein 4 homolog OS=Homo sapiens GN=GET4 PE=1 SV=1	1	1	1	1	0	0	0	1	1	0	0	0	0	1	1	0	0	0	0	1	1	0	4	4	4	36.504	327	327	0	7.892				By MS/MS	By MS/MS		0	0	0	4	4	0
Q7L5N7	Q7L5N7	1	1	1	Lysophosphatidylcholine acyltransferase 2	LPCAT2	Lysophosphatidylcholine acyltransferase 2 OS=Homo sapiens GN=LPCAT2 PE=1 SV=1	1	1	1	1	0	0	0	1	1	0	0	0	0	1	1	0	0	0	0	1	1	0	2	2	2	60.207	544	544	0.0047043	1.684				By MS/MS	By MS/MS		0	0	0	2	2	0
Q7RTV0	Q7RTV0	1	1	1	PHD finger-like domain-containing protein 5A	PHF5A	PHD finger-like domain-containing protein 5A OS=Homo sapiens GN=PHF5A PE=1 SV=1	1	1	1	1	0	1	1	1	1	1	0	1	1	1	1	1	0	1	1	1	1	1	11.8	11.8	11.8	12.405	110	110	0	25.322		By MS/MS	By MS/MS	By matching	By MS/MS	By MS/MS	0	11.8	11.8	11.8	11.8	11.8
Q7Z2T5	Q7Z2T5	1	1	1	TRMT1-like protein	TRMT1L	TRMT1-like protein OS=Homo sapiens GN=TRMT1L PE=1 SV=2	1	1	1	1	0	0	0	1	1	0	0	0	0	1	1	0	0	0	0	1	1	0	2	2	2	81.746	733	733	0	37.166				By MS/MS	By MS/MS		0	0	0	2	2	0
Q7Z2W4-3;Q7Z2W4-2;Q7Z2W4	Q7Z2W4-3;Q7Z2W4-2;Q7Z2W4	6;6;6	6;6;6	6;6;6	Zinc finger CCCH-type antiviral protein 1	ZC3HAV1	Isoform 3 of Zinc finger CCCH-type antiviral protein 1 OS=Homo sapiens GN=ZC3HAV1;Isoform 2 of Zinc finger CCCH-type antiviral protein 1 OS=Homo sapiens GN=ZC3HAV1;Zinc finger CCCH-type antiviral protein 1 OS=Homo sapiens GN=ZC3HAV1 PE=1 SV=3	3	6	6	6	1	4	5	6	5	4	1	4	5	6	5	4	1	4	5	6	5	4	11.9	11.9	11.9	67.589	624	624;699;902	0	89.947	By matching	By MS/MS	By MS/MS	By MS/MS	By MS/MS	By MS/MS	2.4	8.2	9.9	11.9	10.1	8.2
Q7Z3U7-2;Q7Z3U7-6;Q7Z3U7-5;Q7Z3U7;Q7Z3U7-3	Q7Z3U7-2;Q7Z3U7-6;Q7Z3U7-5;Q7Z3U7;Q7Z3U7-3	2;2;2;2;1	2;2;2;2;1	2;2;2;2;1	Protein MON2 homolog	MON2	Isoform 2 of Protein MON2 homolog OS=Homo sapiens GN=MON2;Isoform 6 of Protein MON2 homolog OS=Homo sapiens GN=MON2;Isoform 5 of Protein MON2 homolog OS=Homo sapiens GN=MON2;Protein MON2 homolog OS=Homo sapiens GN=MON2 PE=1 SV=3;Isoform 3 of Protein MON2 h	5	2	2	2	0	0	0	1	2	0	0	0	0	1	2	0	0	0	0	1	2	0	1.3	1.3	1.3	185.85	1675	1675;1688;1711;1717;586	0	4.0101				By MS/MS	By MS/MS		0	0	0	0.7	1.3	0
Q7Z417;Q7Z417-2	Q7Z417	10;1	10;1	10;1	Nuclear fragile X mental retardation-interacting protein 2	NUFIP2	Nuclear fragile X mental retardation-interacting protein 2 OS=Homo sapiens GN=NUFIP2 PE=1 SV=1	2	10	10	10	5	8	9	5	4	8	5	8	9	5	4	8	5	8	9	5	4	8	18	18	18	76.12	695	695;120	0	57.939	By MS/MS	By MS/MS	By MS/MS	By MS/MS	By MS/MS	By MS/MS	9.1	14.4	16	8.9	7.3	14.4
Q7Z460-2;Q7Z460-4;Q7Z460-5;Q7Z460-3;Q7Z460	Q7Z460-2;Q7Z460-4;Q7Z460-5;Q7Z460-3;Q7Z460	5;5;5;5;5	5;5;5;5;5	5;5;5;5;5	CLIP-associating protein 1	CLASP1	Isoform 2 of CLIP-associating protein 1 OS=Homo sapiens GN=CLASP1;Isoform 4 of CLIP-associating protein 1 OS=Homo sapiens GN=CLASP1;Isoform 5 of CLIP-associating protein 1 OS=Homo sapiens GN=CLASP1;Isoform 3 of CLIP-associating protein 1 OS=Homo sapiens GN	5	5	5	5	1	0	0	4	4	0	1	0	0	4	4	0	1	0	0	4	4	0	5	5	5	162.11	1471	1471;1477;1479;1494;1538	0	44.468	By matching			By MS/MS	By MS/MS		1.1	0	0	4.1	3.9	0
Q7Z478	Q7Z478	5	5	5	ATP-dependent RNA helicase DHX29	DHX29	ATP-dependent RNA helicase DHX29 OS=Homo sapiens GN=DHX29 PE=1 SV=2	1	5	5	5	1	1	1	4	4	1	1	1	1	4	4	1	1	1	1	4	4	1	5	5	5	155.23	1369	1369	0	104.17	By matching	By matching	By MS/MS	By MS/MS	By MS/MS	By matching	0.9	0.9	0.9	4.2	4.2	0.9
Q7Z4V5-2;Q7Z4V5;Q7Z4V5-4;Q7Z4V5-3	Q7Z4V5-2;Q7Z4V5;Q7Z4V5-4;Q7Z4V5-3	8;8;7;7	8;8;7;7	8;8;7;7	Hepatoma-derived growth factor-related protein 2	HDGFRP2	Isoform 2 of Hepatoma-derived growth factor-related protein 2 OS=Homo sapiens GN=HDGFL2;Hepatoma-derived growth factor-related protein 2 OS=Homo sapiens GN=HDGFL2 PE=1 SV=1;Isoform 4 of Hepatoma-derived growth factor-related protein 2 OS=Homo sapiens GN=HD	4	8	8	8	6	7	6	3	1	8	6	7	6	3	1	8	6	7	6	3	1	8	13.1	13.1	13.1	74.229	670	670;671;675;676	0	50.626	By MS/MS	By MS/MS	By MS/MS	By MS/MS	By matching	By MS/MS	9.6	11.8	9	3.3	1.3	13.1
Q7Z5J4-3;Q7Z5J4;Q7Z5J4-2	Q7Z5J4-3;Q7Z5J4;Q7Z5J4-2	5;5;4	5;5;4	5;5;4	Retinoic acid-induced protein 1	RAI1	Isoform 3 of Retinoic acid-induced protein 1 OS=Homo sapiens GN=RAI1;Retinoic acid-induced protein 1 OS=Homo sapiens GN=RAI1 PE=1 SV=2;Isoform 2 of Retinoic acid-induced protein 1 OS=Homo sapiens GN=RAI1	3	5	5	5	3	2	4	1	1	3	3	2	4	1	1	3	3	2	4	1	1	3	5	5	5	175.34	1640	1640;1906;1862	0	35.209	By MS/MS	By MS/MS	By MS/MS	By MS/MS	By matching	By MS/MS	3.5	2.4	3.8	1.4	1.2	3.8
Q7Z6E9;Q7Z6E9-2;Q7Z6E9-4	Q7Z6E9;Q7Z6E9-2;Q7Z6E9-4	12;11;6	12;11;6	12;11;6	E3 ubiquitin-protein ligase RBBP6	RBBP6	E3 ubiquitin-protein ligase RBBP6 OS=Homo sapiens GN=RBBP6 PE=1 SV=1;Isoform 2 of E3 ubiquitin-protein ligase RBBP6 OS=Homo sapiens GN=RBBP6;Isoform 4 of E3 ubiquitin-protein ligase RBBP6 OS=Homo sapiens GN=RBBP6	3	12	12	12	11	5	5	5	6	8	11	5	5	5	6	8	11	5	5	5	6	8	7.7	7.7	7.7	201.56	1792	1792;1758;952	0	54.982	By MS/MS	By MS/MS	By MS/MS	By MS/MS	By MS/MS	By MS/MS	7	3	3.7	3.7	4.2	5.6
Q7Z6Z7-2;Q7Z6Z7-3;Q7Z6Z7	Q7Z6Z7-2;Q7Z6Z7-3;Q7Z6Z7	10;10;10	10;10;10	10;10;10	E3 ubiquitin-protein ligase HUWE1	HUWE1	Isoform 2 of E3 ubiquitin-protein ligase HUWE1 OS=Homo sapiens GN=HUWE1;Isoform 3 of E3 ubiquitin-protein ligase HUWE1 OS=Homo sapiens GN=HUWE1;E3 ubiquitin-protein ligase HUWE1 OS=Homo sapiens GN=HUWE1 PE=1 SV=3	3	10	10	10	0	0	1	10	10	1	0	0	1	10	10	1	0	0	1	10	10	1	3.5	3.5	3.5	480.19	4358	4358;4365;4374	0	76.834			By matching	By MS/MS	By MS/MS	By matching	0	0	0.3	3.5	3.5	0.3
Q7Z739	Q7Z739	5	5	2	YTH domain-containing family protein 3	YTHDF3	YTH domain-containing family protein 3 OS=Homo sapiens GN=YTHDF3 PE=1 SV=1	1	5	5	2	1	1	3	4	4	4	1	1	3	4	4	4	1	1	1	1	1	1	9.7	9.7	4.4	63.86	585	585	0	14.928	By MS/MS	By MS/MS	By MS/MS	By MS/MS	By MS/MS	By MS/MS	2.7	2.7	6.5	7	7	8
Q7Z7A3	Q7Z7A3	2	2	2	Cytoplasmic tRNA 2-thiolation protein 1	CTU1	Cytoplasmic tRNA 2-thiolation protein 1 OS=Homo sapiens GN=CTU1 PE=1 SV=1	1	2	2	2	0	0	0	1	2	0	0	0	0	1	2	0	0	0	0	1	2	0	10.3	10.3	10.3	36.45	348	348	0	5.8827				By MS/MS	By MS/MS		0	0	0	4.3	10.3	0
Q7Z7K6-3	Q7Z7K6-3	1	1	1			Isoform 3 of Centromere protein V OS=Homo sapiens GN=CENPV	1	1	1	1	0	1	0	1	1	0	0	1	0	1	1	0	0	1	0	1	1	0	7.7	7.7	7.7	29.73	272	272	0	7.4444		By MS/MS		By MS/MS	By MS/MS		0	7.7	0	7.7	7.7	0
Q86SQ0-2;Q86SQ0-3;Q86SQ0	Q86SQ0-2;Q86SQ0-3;Q86SQ0	3;3;3	3;3;3	3;3;3	Pleckstrin homology-like domain family B member 2	PHLDB2	Isoform 2 of Pleckstrin homology-like domain family B member 2 OS=Homo sapiens GN=PHLDB2;Isoform 3 of Pleckstrin homology-like domain family B member 2 OS=Homo sapiens GN=PHLDB2;Pleckstrin homology-like domain family B member 2 OS=Homo sapiens GN=PHLDB2 PE	3	3	3	3	0	0	0	2	3	0	0	0	0	2	3	0	0	0	0	2	3	0	2.6	2.6	2.6	136.88	1210	1210;1237;1253	0	4.4213				By MS/MS	By MS/MS		0	0	0	1.7	2.6	0
Q86U42-2;Q86U42	Q86U42-2;Q86U42	1;1	1;1	1;1	Polyadenylate-binding protein 2	PABPN1	Isoform 2 of Polyadenylate-binding protein 2 OS=Homo sapiens GN=PABPN1;Polyadenylate-binding protein 2 OS=Homo sapiens GN=PABPN1 PE=1 SV=3	2	1	1	1	0	0	0	1	0	1	0	0	0	1	0	1	0	0	0	1	0	1	5.4	5.4	5.4	31.496	296	296;306	0	3.6357				By MS/MS		By MS/MS	0	0	0	5.4	0	5.4
Q86UE4	Q86UE4	22	22	22	Protein LYRIC	MTDH	Protein LYRIC OS=Homo sapiens GN=MTDH PE=1 SV=2	1	22	22	22	18	13	16	9	10	19	18	13	16	9	10	19	18	13	16	9	10	19	33.8	33.8	33.8	63.836	582	582	0	249.65	By MS/MS	By MS/MS	By MS/MS	By MS/MS	By MS/MS	By MS/MS	31.4	23.4	28.2	20.3	20.3	29
Q86UK7-2;Q86UK7-3;Q86UK7;Q86UK7-4	Q86UK7-2;Q86UK7-3;Q86UK7;Q86UK7-4	2;2;2;1	2;2;2;1	2;2;2;1	Zinc finger protein 598	ZNF598	Isoform 2 of E3 ubiquitin-protein ligase ZNF598 OS=Homo sapiens GN=ZNF598;Isoform 3 of E3 ubiquitin-protein ligase ZNF598 OS=Homo sapiens GN=ZNF598;E3 ubiquitin-protein ligase ZNF598 OS=Homo sapiens GN=ZNF598 PE=1 SV=1;Isoform 4 of E3 ubiquitin-protein lig	4	2	2	2	0	0	0	2	2	0	0	0	0	2	2	0	0	0	0	2	2	0	3.7	3.7	3.7	97.805	896	896;898;904;341	0	16.027				By MS/MS	By MS/MS		0	0	0	3.7	3.7	0
Q86UP2-2;Q86UP2-4;Q86UP2;Q86UP2-3	Q86UP2-2;Q86UP2-4;Q86UP2;Q86UP2-3	31;31;31;28	31;31;31;28	31;31;31;28	Kinectin	KTN1	Isoform 2 of Kinectin OS=Homo sapiens GN=KTN1;Isoform 4 of Kinectin OS=Homo sapiens GN=KTN1;Kinectin OS=Homo sapiens GN=KTN1 PE=1 SV=1;Isoform 3 of Kinectin OS=Homo sapiens GN=KTN1	4	31	31	31	16	17	20	22	24	24	16	17	20	22	24	24	16	17	20	22	24	24	23.8	23.8	23.8	149.61	1300	1300;1329;1357;1306	0	228.5	By MS/MS	By MS/MS	By MS/MS	By MS/MS	By MS/MS	By MS/MS	13.1	13.8	15.3	17.7	18.8	19.5
Q86V48-2;Q86V48-3;Q86V48	Q86V48-2;Q86V48-3;Q86V48	12;12;12	12;12;12	12;12;12	Leucine zipper protein 1	LUZP1	Isoform 2 of Leucine zipper protein 1 OS=Homo sapiens GN=LUZP1;Isoform 3 of Leucine zipper protein 1 OS=Homo sapiens GN=LUZP1;Leucine zipper protein 1 OS=Homo sapiens GN=LUZP1 PE=1 SV=2	3	12	12	12	3	2	0	9	11	3	3	2	0	9	11	3	3	2	0	9	11	3	16.7	16.7	16.7	114.59	1026	1026;1053;1076	0	43.229	By MS/MS	By matching		By MS/MS	By MS/MS	By MS/MS	4.3	2.8	0	12.6	15.7	4.2
Q86VI3	Q86VI3	2	2	2	Ras GTPase-activating-like protein IQGAP3	IQGAP3	Ras GTPase-activating-like protein IQGAP3 OS=Homo sapiens GN=IQGAP3 PE=1 SV=2	1	2	2	2	0	0	0	2	2	0	0	0	0	2	2	0	0	0	0	2	2	0	1.8	1.8	1.8	184.7	1631	1631	0	33.875				By MS/MS	By MS/MS		0	0	0	1.8	1.8	0
Q86VM9;Q86VM9-2	Q86VM9;Q86VM9-2	10;8	10;8	10;8	Zinc finger CCCH domain-containing protein 18	ZC3H18	Zinc finger CCCH domain-containing protein 18 OS=Homo sapiens GN=ZC3H18 PE=1 SV=2;Isoform 2 of Zinc finger CCCH domain-containing protein 18 OS=Homo sapiens GN=ZC3H18	2	10	10	10	8	8	10	2	1	8	8	8	10	2	1	8	8	8	10	2	1	8	11.8	11.8	11.8	106.38	953	953;757	0	54.159	By MS/MS	By MS/MS	By MS/MS	By MS/MS	By MS/MS	By MS/MS	9.7	10.1	11.8	2.4	1.4	10.1
Q86VP6;Q86VP6-2;Q86VP6-3;O75155-2;O75155	Q86VP6;Q86VP6-2	11;10;2;1;1	11;10;2;1;1	11;10;2;1;1	Cullin-associated NEDD8-dissociated protein 1	CAND1	Cullin-associated NEDD8-dissociated protein 1 OS=Homo sapiens GN=CAND1 PE=1 SV=2;Isoform 2 of Cullin-associated NEDD8-dissociated protein 1 OS=Homo sapiens GN=CAND1	5	11	11	11	1	0	0	9	8	0	1	0	0	9	8	0	1	0	0	9	8	0	10	10	10	136.37	1230	1230;1062;403;1119;1236	0	57.294	By matching			By MS/MS	By MS/MS		0.8	0	0	8.6	6.4	0
Q86WX3	Q86WX3	3	3	3	Active regulator of SIRT1	RPS19BP1	Active regulator of SIRT1 OS=Homo sapiens GN=RPS19BP1 PE=1 SV=1	1	3	3	3	1	3	3	0	1	3	1	3	3	0	1	3	1	3	3	0	1	3	28.7	28.7	28.7	15.434	136	136	0	37.811	By MS/MS	By MS/MS	By MS/MS		By MS/MS	By MS/MS	9.6	28.7	28.7	0	9.6	28.7
Q86XI2;Q86XI2-2	Q86XI2;Q86XI2-2	2;2	2;2	2;2	Condensin-2 complex subunit G2	NCAPG2	Condensin-2 complex subunit G2 OS=Homo sapiens GN=NCAPG2 PE=1 SV=1;Isoform 2 of Condensin-2 complex subunit G2 OS=Homo sapiens GN=NCAPG2	2	2	2	2	0	0	0	2	1	0	0	0	0	2	1	0	0	0	0	2	1	0	1.7	1.7	1.7	130.96	1143	1143;1156	0	2.9402				By MS/MS	By MS/MS		0	0	0	1.7	0.9	0
Q86YA3-3;Q86YA3-6;Q86YA3-5;Q86YA3-4;Q86YA3	Q86YA3-3;Q86YA3-6;Q86YA3-5;Q86YA3-4;Q86YA3	1;1;1;1;1	1;1;1;1;1	1;1;1;1;1	Protein ZGRF1	ZGRF1	Isoform 3 of Protein ZGRF1 OS=Homo sapiens GN=ZGRF1;Isoform 6 of Protein ZGRF1 OS=Homo sapiens GN=ZGRF1;Isoform 5 of Protein ZGRF1 OS=Homo sapiens GN=ZGRF1;Isoform 4 of Protein ZGRF1 OS=Homo sapiens GN=ZGRF1;Protein ZGRF1 OS=Homo sapiens GN=ZGRF1 PE=1 SV=3	5	1	1	1	1	0	0	1	1	0	1	0	0	1	1	0	1	0	0	1	1	0	1.3	1.3	1.3	93.566	832	832;915;927;1062;2104	0.00075358	2.324	By MS/MS			By MS/MS	By MS/MS		1.3	0	0	1.3	1.3	0
Q86YP4-2;Q86YP4;Q86YP4-3	Q86YP4-2;Q86YP4;Q86YP4-3	5;5;5	5;5;5	4;4;4	Transcriptional repressor p66-alpha	GATAD2A	Isoform 2 of Transcriptional repressor p66-alpha OS=Homo sapiens GN=GATAD2A;Transcriptional repressor p66-alpha OS=Homo sapiens GN=GATAD2A PE=1 SV=1;Isoform 3 of Transcriptional repressor p66-alpha OS=Homo sapiens GN=GATAD2A	3	5	5	4	0	0	1	5	4	1	0	0	1	5	4	1	0	0	0	4	3	1	12	12	10.2	65.225	608	608;633;634	0	52.674			By matching	By MS/MS	By MS/MS	By matching	0	0	1.8	12	8.2	2
Q8IV32	Q8IV32	1	1	1	Coiled-coil domain-containing protein 71	CCDC71	Coiled-coil domain-containing protein 71 OS=Homo sapiens GN=CCDC71 PE=1 SV=3	1	1	1	1	0	0	0	1	1	0	0	0	0	1	1	0	0	0	0	1	1	0	2.1	2.1	2.1	49.648	467	467	0.001444	2.1113				By MS/MS	By MS/MS		0	0	0	2.1	2.1	0
Q8IVF2-3;Q8IVF2	Q8IVF2-3;Q8IVF2	4;4	4;4	4;4	Protein AHNAK2	AHNAK2	Isoform 3 of Protein AHNAK2 OS=Homo sapiens GN=AHNAK2;Protein AHNAK2 OS=Homo sapiens GN=AHNAK2 PE=1 SV=2	2	4	4	4	0	0	0	3	3	0	0	0	0	3	3	0	0	0	0	3	3	0	3.7	3.7	3.7	605.64	5695	5695;5795	0	8.0608				By MS/MS	By MS/MS		0	0	0	3.4	3.4	0
[truncated: 580 more rows]
[truncated: 42 more columns]
