# Supplementary material for: MARK2 regulates Golgi apparatus reorientation by phosphorylation of CAMSAP2 in directional cell migratio
Source: eLife journal article supplement (doi:10.7554/elife.105977), 2025-03-26
Supplement: fig6-figsupp2-data1 [file elife-105977-fig6-figsupp2-data1-v1.zip]

## Sheet: Sheet1
Distance_(microns)	GM130	USO1
0	0	1
0.0353	0	2
0.0706	0	2
0.1059	0	1
0.1412	0	1
0.1765	0	0
0.2117	0	0
0.247	0	0
0.2823	0	0
0.3176	0	0
0.3529	0	0
0.3882	0	0
0.4235	0	0
0.4588	0	1
0.4941	0	2
0.5294	0	2
0.5647	0	1
0.5999	0	1
0.6352	0	1
0.6705	0	1
0.7058	0	1
0.7411	0	1
0.7764	0	0
0.8117	0	0
0.847	0	0
0.8823	0	0
0.9176	0	1
0.9529	0	1
0.9881	0	1
1.0234	0	0
1.0587	0	0
1.094	0	0
1.1293	0	0
1.1646	0	0
1.1999	0	0
1.2352	0	2
1.2705	0	9
1.3058	0	19
1.3411	0	27
1.3763	0	29
1.4116	0	25
1.4469	0	19
1.4822	0	16
1.5175	0	15
1.5528	0	13
1.5881	0	8
1.6234	0	5
1.6587	0	3
1.694	0	3
1.7292	0	3
1.7645	0	1
1.7998	0	0
1.8351	0	0
1.8704	1	0
1.9057	1	1
1.941	0	2
1.9763	0	1
2.0116	0	2
2.0469	0	3
2.0822	0	6
2.1174	0	10
2.1527	1	13
2.188	1	14
2.2233	1	15
2.2586	1	15
2.2939	1	17
2.3292	0	12
2.3645	0	14
2.3998	1	16
2.4351	1	17
2.4704	1	17
2.5056	0	17
2.5409	0	15
2.5762	0	12
2.6115	0	9
2.6468	0	7
2.6821	0	6
2.7174	1	4
2.7527	1	3
2.788	1	4
2.8233	1	6
2.8586	1	11
2.8938	1	16
2.9291	2	21
2.9644	3	21
2.9997	5	18
3.035	6	13
3.0703	7	8
3.1056	7	5
3.1409	7	3
3.1762	6	2
3.2115	4	2
3.2468	3	4
3.282	2	6
3.3173	2	5
3.3526	2	3
3.3879	3	1
3.4232	3	0
3.4585	3	0
3.4938	3	1
3.5291	2	0
3.5644	2	0
3.5997	3	0
3.635	3	0
3.6702	4	1
3.7055	4	2
3.7408	5	2
3.7761	4	1
3.8114	4	0
3.8467	3	0
3.882	2	0
3.9173	2	0
3.9526	1	1
3.9879	1	1
4.0231	1	1
4.0584	2	1
4.0937	3	0
4.129	3	0
4.1643	4	0
4.1996	4	0
4.2349	3	1
4.2702	2	1
4.3055	1	0
4.3408	0	0
4.3761	0	1
4.4113	0	2
4.4466	4	3
4.4819	10	5
4.5172	18	7
4.5525	27	8
4.5878	36	8
4.6231	44	6
4.6584	52	5
4.6937	59	4
4.729	65	4
4.7643	70	6
4.7995	70	7
4.8348	64	6
4.8701	53	4
4.9054	40	2
4.9407	27	1
4.976	17	2
5.0113	10	2
5.0466	5	2
5.0819	2	1
5.1172	0	0
5.1525	0	0
5.1877	0	0
5.223	0	1
5.2583	0	1
5.2936	0	0
5.3289	0	0
5.3642	0	0
5.3995	0	0
5.4348	1	0
5.4701	1	2
5.5054	0	4
5.5407	0	6
5.5759	0	8
5.6112	0	8
5.6465	0	6
5.6818	0	5
5.7171	0	5
5.7524	0	5
5.7877	1	5
5.823	1	2
5.8583	1	0
5.8936	1	0
5.9289	1	0
5.9641	0	0
5.9994	0	0
6.0347	1	0
6.07	2	0
6.1053	3	0
6.1406	4	0
6.1759	5	0
6.2112	7	0
6.2465	10	0
6.2818	12	0
6.3171	13	2
6.3523	13	4
6.3876	10	7
6.4229	6	11
6.4582	3	20
6.4935	3	35
6.5288	6	60
6.5641	14	87
6.5994	26	103
6.6347	41	99
6.67	56	81
6.7053	67	60
6.7405	72	47
6.7758	71	38
6.8111	63	32
6.8464	51	27
6.8817	37	23
6.917	26	19
6.9523	20	15
6.9876	24	12
7.0229	27	10
7.0582	30	9
7.0934	30	10
7.1287	26	11
7.164	21	15
7.1993	16	23
7.2346	15	39
7.2699	18	60
7.3052	25	76
7.3405	35	81
7.3758	44	74
7.4111	51	65
7.4464	53	58
7.4816	50	54
7.5169	44	47
7.5522	38	37
7.5875	37	28
7.6228	40	22
7.6581	47	20
7.6934	55	20
7.7287	60	18
7.764	61	15
7.7993	58	12
7.8346	52	9
7.8698	45	9
7.9051	36	11
7.9404	29	14
7.9757	23	18
8.011	19	23
8.0463	16	27
8.0816	14	32
8.1169	12	34
8.1522	11	33
8.1875	11	28
8.2228	11	25
8.258	12	27
8.2933	13	33
8.3286	14	38
8.3639	15	35
8.3992	18	28
8.4345	21	23
8.4698	24	26
8.5051	28	36
8.5404	32	49
8.5757	38	60
8.611	47	66
8.6462	58	66
8.6815	68	61
8.7168	76	53
8.7521	78	44
8.7874	73	35
8.8227	63	29
8.858	50	29
8.8933	38	32
8.9286	29	32
8.9639	24	28
8.9992	23	24
9.0344	25	20
9.0697	28	17
9.105	31	12
9.1403	34	6
9.1756	36	2
9.2109	40	3
9.2462	44	5
9.2815	48	7
9.3168	49	10
9.3521	46	11
9.3874	40	11
9.4226	35	8
9.4579	31	5
9.4932	29	5
9.5285	29	6
9.5638	29	8
9.5991	29	8
9.6344	30	7
9.6697	30	6
9.705	29	4
9.7403	25	4
9.7755	21	4
9.8108	16	5
9.8461	13	6
9.8814	11	7
9.9167	10	7
9.952	10	10
9.9873	10	12
10.0226	12	14
10.0579	13	14
10.0932	17	13
10.1285	22	12
10.1637	30	13
10.199	40	16
10.2343	51	22
10.2696	59	28
10.3049	63	34
10.3402	65	38
10.3755	65	40
10.4108	64	44
10.4461	62	52
10.4814	57	66
10.5167	48	82
10.5519	36	94
10.5872	24	98
10.6225	16	97
10.6578	15	93
10.6931	20	85
10.7284	28	72
10.7637	35	54
10.799	41	36
10.8343	43	24
10.8696	41	18
10.9049	35	15
10.9401	27	12
10.9754	18	9
11.0107	12	6
11.046	8	4
11.0813	8	5
11.1166	8	7
11.1519	7	8
11.1872	6	8
11.2225	4	9
11.2578	3	12
11.2931	3	17
11.3283	5	23
11.3636	9	27
11.3989	12	29
11.4342	15	31
11.4695	17	34
11.5048	18	37
11.5401	19	39
11.5754	20	38
11.6107	22	33
11.646	22	26
11.6813	21	20
11.7165	20	16
11.7518	17	13
11.7871	16	10
11.8224	13	9
11.8577	11	8
11.893	8	8
11.9283	8	10
11.9636	9	17
11.9989	12	31
12.0342	16	43
12.0695	19	47
12.1047	21	43
12.14	21	37
12.1753	19	35
12.2106	17	38
12.2459	16	39
12.2812	16	38
12.3165	15	33
12.3518	13	27
12.3871	11	20
12.4224	10	16
12.4576	12	17
12.4929	15	23
12.5282	16	32
12.5635	14	41
12.5988	11	46
12.6341	8	51
12.6694	9	58
12.7047	17	69
12.74	31	81
12.7753	50	89
12.8106	70	89
12.8458	91	82
12.8811	110	70
12.9164	126	56
12.9517	136	43
12.987	137	33
13.0223	126	23
13.0576	107	15
13.0929	82	11
13.1282	58	9
13.1635	37	8
13.1988	23	10
13.234	15	12
13.2693	13	12
13.3046	15	11
13.3399	16	11
13.3752	16	14
13.4105	14	17
13.4458	12	19
13.4811	9	18
13.5164	8	17
13.5517	8	15
13.587	8	14
13.6222	9	13
13.6575	10	14
13.6928	11	15
13.7281	12	15
13.7634	11	13
13.7987	10	10
13.834	8	6
13.8693	7	3
13.9046	8	1
13.9399	10	1
