# Supplementary material for: MARK2 regulates Golgi apparatus reorientation by phosphorylation of CAMSAP2 in directional cell migratio
Source: eLife journal article supplement (doi:10.7554/elife.105977), 2025-03-26
Supplement: fig6-figsupp2-data1 [file Supplementary figure6B source data 1.xlsx]

## Sheet: Sheet1
X	FLAG-USO1	CAMSAP2
0	68	17
0.1625	68	17
0.325	84	25
0.4875	90	32
0.65	74	17
0.8125	115	29
0.975	145	96
1.1375	145	96
1.3	153	133
1.4625	205	136
1.625	244	122
1.7875	287	131
1.95	276	252
2.1125	195	189
2.275	225	268
2.4375	341	313
2.6	434	421
2.7625	640	406
2.925	660	502
3.0875	563	221
3.25	563	221
3.4125	352	157
3.575	250	118
3.7375	249	83
3.9	232	91
4.0625	183	111
4.225	202	128
4.3875	203	160
4.55	176	222
4.7125	219	301
4.875	426	388
5.0375	438	621
5.2	450	580
5.3625	450	580
5.525	462	333
5.6875	419	341
5.85	366	349
6.0125	391	299
6.175	399	356
6.3375	520	352
6.5	574	303
6.6625	715	217
6.825	842	253
6.9875	896	317
7.15	936	343
7.3125	776	445
7.475	776	445
7.6375	587	322
7.8	518	214
7.9625	308	220
8.125	254	216
8.2875	281	317
8.45	398	270
8.6125	476	290
8.775	547	264
8.9375	705	332
9.1	837	564
9.2625	852	635
9.425	678	655
9.5875	678	655
9.75	478	597
9.9125	438	335
10.075	425	390
10.2375	373	484
10.4	374	343
10.5625	408	585
10.725	314	546
10.8875	210	331
11.05	234	134
11.2125	228	269
11.375	345	289
11.5375	400	327
11.7	400	327
11.8625	587	441
12.025	935	433
12.1875	493	300
12.35	330	237
12.5125	72	154
12.675	40	150
12.8375	32	112
13	37	72
13.1625	41	58
13.325	60	48
13.4875	42	59
13.65	37	86
13.8125	37	86
13.975	31	70
14.1375	24	50
14.3	11	63
14.4625	8	85
14.625	18	52
14.7875	5	47
