# Supplementary material for: MARK2 regulates Golgi apparatus reorientation by phosphorylation of CAMSAP2 in directional cell migratio
Source: eLife journal article supplement (doi:10.7554/elife.105977), 2025-03-26
Supplement: fig6-figsupp2-data1 [file Supplementary figure6D source data 2.xlsx]

## Sheet: Sheet1
2h	GM130	USO1
0	2	7
0.03529	2	8
0.07058	2	9
0.10587	2	9
0.14116	2	10
0.17645	2	12
0.21174	1	16
0.24704	1	20
0.28233	1	23
0.31762	1	22
0.35291	2	21
0.3882	1	20
0.42349	1	20
0.45878	1	20
0.49407	1	18
0.52936	1	12
0.56465	1	12
0.59994	2	12
0.63523	2	11
0.67053	3	10
0.70582	3	8
0.74111	2	7
0.7764	2	6
0.81169	2	5
0.84698	1	7
0.88227	1	9
0.91756	1	11
0.95285	1	13
0.98814	1	14
1.02343	1	14
1.05872	1	13
1.09401	2	11
1.12931	2	10
1.1646	3	10
1.19989	3	10
1.23518	3	11
1.27047	3	13
1.30576	2	16
1.34105	3	18
1.37634	3	19
1.41163	3	19
1.44692	4	18
1.48221	4	17
1.5175	4	16
1.55279	4	20
1.58809	6	27
1.62338	7	32
1.65867	9	34
1.69396	11	34
1.72925	12	35
1.76454	13	36
1.79983	14	36
1.83512	16	33
1.87041	18	31
1.9057	21	32
1.94099	24	38
1.97628	26	49
2.01157	28	60
2.04687	31	69
2.08216	35	72
2.11745	39	71
2.15274	45	68
2.18803	51	63
2.22332	55	54
2.25861	59	45
2.2939	61	38
2.32919	63	37
2.36448	63	41
2.39977	62	50
2.43506	60	59
2.47036	59	64
2.50565	54	60
2.54094	52	54
2.57623	47	44
2.61152	41	36
2.64681	34	32
2.6821	30	29
2.71739	27	27
2.75268	26	25
2.78797	25	24
2.82326	24	27
2.85855	23	33
2.89384	20	39
2.92914	17	46
2.96443	15	53
2.99972	15	65
3.03501	16	79
3.0703	19	95
3.10559	25	112
3.14088	36	133
3.17617	53	160
3.21146	78	191
3.24675	108	218
3.28204	140	233
3.31733	169	235
3.35263	192	222
3.38792	206	195
3.42321	213	160
3.4585	211	126
3.49379	202	101
3.52908	185	67
3.56437	169	52
3.59966	152	39
3.63495	136	29
3.67024	120	22
3.70553	103	17
3.74082	85	14
3.77611	68	12
3.81141	52	11
3.8467	39	11
3.88199	29	11
3.91728	22	10
3.95257	16	11
3.98786	11	14
4.02315	8	21
4.05844	6	30
4.09373	6	42
4.12902	7	54
4.16431	11	65
4.1996	16	74
4.23489	24	84
4.27019	32	92
4.30548	39	94
4.34077	45	91
4.37606	51	86
4.41135	58	83
4.44664	64	79
4.48193	67	71
4.51722	64	67
4.55251	62	62
4.5878	58	58
4.62309	54	56
4.65838	49	55
4.69368	45	53
4.72897	43	52
4.76426	44	55
4.79955	48	59
4.83484	54	61
4.87013	60	58
4.90542	63	49
4.94071	63	41
4.976	58	37
5.01129	51	38
5.04658	45	43
5.08187	40	47
5.11716	39	49
5.15246	42	47
5.18775	48	42
5.22304	56	35
5.25833	64	27
5.29362	71	22
5.32891	73	18
5.3642	71	17
5.39949	64	19
5.43478	55	23
5.47007	47	28
5.50536	43	31
5.54065	37	24
5.57594	39	23
5.61124	39	21
5.64653	38	20
5.68182	35	19
5.71711	31	19
5.7524	27	20
5.78769	25	21
5.82298	25	20
5.85827	26	17
5.89356	27	14
5.92885	26	11
5.96414	23	8
5.99943	19	5
6.03473	15	3
6.07002	12	3
6.10531	10	3
6.1406	9	3
6.17589	8	5
6.21118	7	9
6.24647	6	12
6.28176	4	15
6.31705	2	16
6.35234	1	15
6.38763	1	13
6.42292	1	12
6.45821	1	10
6.49351	1	9
6.5288	1	7
6.56409	1	5
6.59938	2	4
6.63467	2	3
6.66996	1	3
6.70525	1	3
6.74054	0	3
6.77583	0	4
6.81112	0	6
6.84641	1	9
6.8817	1	10
6.917	1	10
6.95229	1	8
6.98758	1	7
7.02287	1	8
7.05816	1	13
7.09345	1	19
7.12874	1	27
7.16403	1	32
7.19932	2	35
7.23461	2	33
7.2699	3	29
7.30519	3	23
7.34048	3	20
7.37578	4	20
7.41107	5	22
7.44636	5	23
7.48165	4	22
7.51694	3	27
7.55223	2	24
7.58752	1	21
7.62281	2	17
7.6581	3	14
7.69339	3	13
7.72868	4	14
7.76397	4	18
7.79926	4	20
7.83456	4	19
7.86985	4	14
7.90514	4	9
7.94043	3	5
7.97572	3	5
8.01101	2	7
