# Supplementary material for: MARK2 regulates Golgi apparatus reorientation by phosphorylation of CAMSAP2 in directional cell migratio
Source: eLife journal article supplement (doi:10.7554/elife.105977), 2025-03-26
Supplement: fig6-figsupp2-data1 [file Supplementary figure6F source data 1.xlsx]

## Sheet: Sheet1
0.5H	GM130	α-Tubulin
0.085833	28.2771	95.6705
0.171667	34.3834	91.0532
0.2575	40.4427	82.2632
0.343333	46.098	72.2557
0.429167	50.8327	70.8191
0.515	53.7884	68.3181
0.600833	56.9114	64.7172
0.686667	59.4847	67.2841
0.7725	59.5131	74.8952
0.858333	61.3368	76.9831
0.944167	60.3299	73.7894
1.03	60.1144	71.5374
1.1159	57.7407	68.689
1.20173	54.632	68.0124
1.28756	52.5203	66.0297
1.3734	49.8238	62.9009
1.45923	51.2127	59.3038
1.54506	51.8973	56.9995
1.6309	46.1437	57.3453
1.71673	46.2893	59.2594
1.80256	45.9098	58.8281
1.8884	44.9174	60.4015
1.97423	48.7893	61.7052
2.06006	51.202	62.1295
2.1459	52.2796	61.8785
2.23173	56.9354	60.4534
2.31756	61.9547	57.9655
2.4034	71.4206	56.1157
2.48923	70.2421	52.6343
2.57506	69.2146	51.7574
2.6609	70.8663	51.5056
2.74673	67.4225	51.6523
2.83256	65.6636	53.4603
2.9184	64.3954	53.5726
3.00423	65.6209	53.0284
3.09006	69.5954	52.0551
3.17596	67.8514	52.3582
3.2618	68.0076	52.5559
3.34763	70.7297	52.8269
3.43346	76.228	53.3214
3.5193	79.7944	53.7389
3.60513	82.674	53.4236
3.69096	84.0853	52.4986
3.77679	81.7917	52.439
3.86263	75.4487	51.3947
3.94846	71.0833	51.897
4.0343	69.8258	51.4494
4.12013	69.4963	50.7938
4.20596	67.168	52.1572
4.29179	64.6345	54.2436
4.37763	67.0757	54.0073
4.46346	67.9232	53.3104
4.54929	68.9881	52.9217
4.63513	71.4735	54.6508
4.72096	73.354	56.3486
4.8068	76.8877	58.2808
4.89263	76.6794	58.9236
4.97846	77.5541	59.6722
5.0643	81.6268	60.1238
5.15013	87.6533	59.3712
5.23603	90.9148	57.9313
5.32186	94.1372	57.0353
5.40769	93.6207	56.9622
5.49353	95.4124	57.8415
5.57936	92.1888	59.9068
5.66519	89.1243	62.0453
5.75103	89.8412	63.0188
5.83686	92.9953	63.7473
5.92269	87.7109	63.5118
6.00853	86.1027	64.231
6.09436	86.0526	64.745
6.18019	87.679	63.7035
6.26603	91.9478	63.8308
6.35186	96.1968	64.8996
6.43769	100	65.0056
6.52353	98.363	64.0312
6.60936	93.4061	64.4699
6.69519	84.7789	65.6769
6.78103	80.726	65.0958
6.86686	79.1785	65.3076
6.95269	77.2866	66.1911
7.03853	77.3359	66.7236
7.12436	78.3827	66.063
7.21019	77.6796	66.3678
7.29603	79.6224	66.9882
7.38192	79.3245	67.5625
7.46776	71.3011	68.2763
7.55359	68.4243	69.2279
7.63942	62.7051	68.2517
7.72526	57.8536	68.5528
7.81109	56.1254	70.7443
7.89692	54.9894	73.4925
7.98276	52.2425	75.3934
8.06859	50.3218	76.7698
8.15442	50.6745	76.9425
8.24026	48.9053	79.3438
8.32609	45.9338	82.6504
8.41192	43.8407	83.9353
8.49776	39.3715	85.164
8.58359	36.6596	87.6232
8.66942	35.8141	88.1891
8.75526	31.9864	87.8945
8.84109	28.6752	87.5387
8.92692	26.1883	85.6565
9.01276	23.3518	84.3571
9.09859	20.6621	83.2432
9.18442	19.2302	83.3414
9.27026	19.2649	85.3278
9.35609	19.7652	87.3796
9.44199	18.9765	90.2256
9.52782	17.8978	92.889
9.61365	17.4298	96.3428
9.69949	17.5525	96.0196
9.78532	15.8346	96.1041
9.87115	14.0038	95.7209
9.95699	13.3208	94.9913
10.0428	12.8916	95.0105
10.1287	13.2995	94.7259
10.2145	13.2194	95.7578
10.3003	12.6517	97.4769
10.3862	12.3897	96.7969
10.472	11.5575	94.9531
10.5578	10.8757	93.2531
10.6436	10.2776	92.281
10.7295	10.0965	93.5754
10.8153	9.53343	94.0505
10.9011	9.26039	93.6489
10.987	9.13689	93.7745
11.0728	8.45746	94.3117
11.1586	8.42471	95.2866
11.2445	8.24715	97.145
11.3303	8.23058	97.7736
11.4162	8.25465	99.0223
11.5021	8.24281	100
11.5879	8.19271	99.0145
11.6737	7.80998	97.6263
11.7596	7.53694	96.5164
11.8454	7.66715	93.9133
11.9312	7.73264	91.9115
12.017	7.90349	92.4241
12.1029	7.69161	89.0134
12.1887	7.45566	86.4001
12.2745	7.36886	88.1751
12.3604	7.72081	85.0092
12.4462	7.95478	83.3697
12.532	7.63992	77.4905
