# Supplementary material for: MARK2 regulates Golgi apparatus reorientation by phosphorylation of CAMSAP2 in directional cell migratio
Source: eLife journal article supplement (doi:10.7554/elife.105977), 2025-03-26
Supplement: fig6-figsupp2-data1 [file Supplementary figure6F source data 2.xlsx]

## Sheet: Sheet1
2H	GM130	α-Tubulin
0.085833	16.2934	68.0457
0.171667	20.9464	64.7332
0.2575	27.1141	68.5122
0.343333	35.6777	70.9918
0.429167	49.0648	69.8517
0.515	61.3496	71.1335
0.600833	68.5029	77.9854
0.686667	76.8869	82.2639
0.7725	82.1787	87.1344
0.858333	80.2391	94.2703
0.944167	81.8181	97.0701
1.03	84.7204	99.6721
1.1159	90.6018	100
1.20173	97.5307	96.184
1.28756	100	92.7021
1.3734	94.8727	88.8378
1.45923	92.8577	85.6305
1.54506	91.2359	81.9734
1.6309	87.5107	80.4273
1.71673	87.1952	82.4766
1.80256	86.8064	85.8553
1.8884	86.2969	88.7455
1.97423	81.4161	89.5984
2.06006	77.7244	90.0369
2.1459	77.8133	88.6808
2.23173	76.8532	87.6884
2.31756	77.7264	87.2211
2.4034	80.7953	84.7037
2.48923	83.4678	85.2254
2.57506	86.5678	84.2675
2.6609	88.2664	81.1868
2.74673	89.3228	78.9103
2.83256	87.092	80.3496
2.9184	81.68	82.94
3.00423	72.3642	84.0996
3.09006	58.2538	82.6567
3.17596	49.3122	80.9836
3.2618	44.5551	80.0296
3.34763	39.6535	79.4024
3.43346	37.2266	75.412
3.5193	35.095	71.218
3.60513	33.7685	70.3903
3.69096	32.7089	71.2087
3.77679	29.7333	70.1765
3.86263	26.4354	68.9282
3.94846	25.0101	67.1136
4.0343	22.7733	64.672
4.12013	19.9397	62.4978
4.20596	18.8304	61.9128
4.29179	18.5636	59.8396
4.37763	17.6009	57.8671
4.46346	16.5796	56.9974
4.54929	15.9728	55.8604
4.63513	15.0679	55.1321
4.72096	15.4064	54.6102
4.8068	16.0653	53.1696
4.89263	15.2239	52.0212
4.97846	14.2503	51.7965
5.0643	12.2477	51.7801
5.15013	9.87589	50.6201
5.23603	8.26386	49.6055
5.32186	7.2015	50.02
5.40769	6.61442	52.1348
5.49353	6.44003	51.3056
5.57936	7.18594	49.3881
5.66519	7.8526	47.5902
5.75103	8.1695	47.3946
5.83686	8.34956	46.3546
5.92269	7.20778	46.2668
6.00853	6.79257	43.8308
6.09436	6.03504	43.4952
6.18019	5.54063	44.0281
6.26603	5.77488	41.8194
6.35186	5.99469	41.7916
6.43769	5.80485	42.5443
6.52353	5.2489	42.8348
6.60936	4.55019	42.4886
6.69519	4.06554	41.8817
6.78103	3.871	42.1464
6.86686	3.61243	42.2772
6.95269	3.56296	42.3953
7.03853	3.48458	41.0123
7.12436	3.44938	39.6741
7.21019	3.52631	39.3305
7.29603	3.53479	38.9342
7.38192	3.37706	38.6225
7.46776	3.10099	39.0679
7.55359	3.01472	39.1891
7.63942	3.11468	39.6086
7.72526	3.3994	39.2467
7.81109	3.52442	39.1191
7.89692	3.34724	38.385
7.98276	3.16628	37.7578
8.06859	3.00558	38.0873
8.15442	2.99011	38.623
8.24026	3.17612	39.1734
8.32609	3.22745	38.9359
8.41192	3.22779	39.3017
8.49776	3.03529	38.8111
8.58359	2.78748	37.7597
8.66942	2.68042	37.7261
8.75526	2.73384	37.5269
8.84109	2.57487	38.1384
8.92692	2.50675	37.5117
9.01276	2.4946	36.0067
9.09859	2.39521	34.7175
9.18442	2.24906	33.9781
9.27026	2.11086	32.1134
9.35609	2.10222	31.8276
9.44199	2.07842	32.0754
9.52782	2.22923	32.3503
9.61365	2.27347	31.7535
9.69949	2.29887	30.9943
9.78532	2.20937	30.5744
9.87115	2.25543	30.7752
9.95699	2.53905	31.2241
10.0428	2.71966	30.8361
10.1287	2.71982	29.819
10.2145	2.51796	30.1677
10.3003	2.38203	29.6988
10.3862	2.42799	29.6724
10.472	2.45907	30.472
10.5578	2.52385	29.5106
10.6436	2.4202	29.3563
10.7295	2.3167	30.2523
10.8153	2.24941	29.8152
10.9011	2.12169	29.0419
10.987	2.13639	28.2123
11.0728	2.17759	27.3099
11.1586	2.3786	27.1884
11.2445	2.55272	27.7788
11.3303	2.40026	28.1482
11.4162	2.20465	27.7862
11.5021	2.16788	27.5425
11.5879	2.05036	25.949
11.6737	1.95343	25.4087
11.7596	2.01094	25.4404
11.8454	1.8736	24.0274
11.9312	1.85833	23.4752
12.017	1.87072	24.1699
12.1029	1.93409	24.1235
12.1887	1.9473	24.1355
12.2745	1.96176	24.4604
12.3604	1.84303	23.4922
12.4462	1.83855	23.4327
12.532	1.70608	20.973
