# Supplementary material for: MARK2 regulates Golgi apparatus reorientation by phosphorylation of CAMSAP2 in directional cell migratio
Source: eLife. 2025 May 7;14:RP105977. doi: 10.7554/eLife.105977 (PMC12058119; doi:10.7554/eLife.105977)
Supplement: Figure 5—figure supplement 1—source data 3. [file elife-105977-fig5-figsupp1-data3.xlsx]

## Sheet: Sheet1
S835A	S835D
22.7	33.1
28.3	38.3
22.2	38.1
