# Supplementary figures and images for: MARK2 regulates Golgi apparatus reorientation by phosphorylation of CAMSAP2 in directional cell migratio
Source: eLife journal article supplement (doi:10.7554/elife.105977), 2025-03-26

Supplementary figure1B

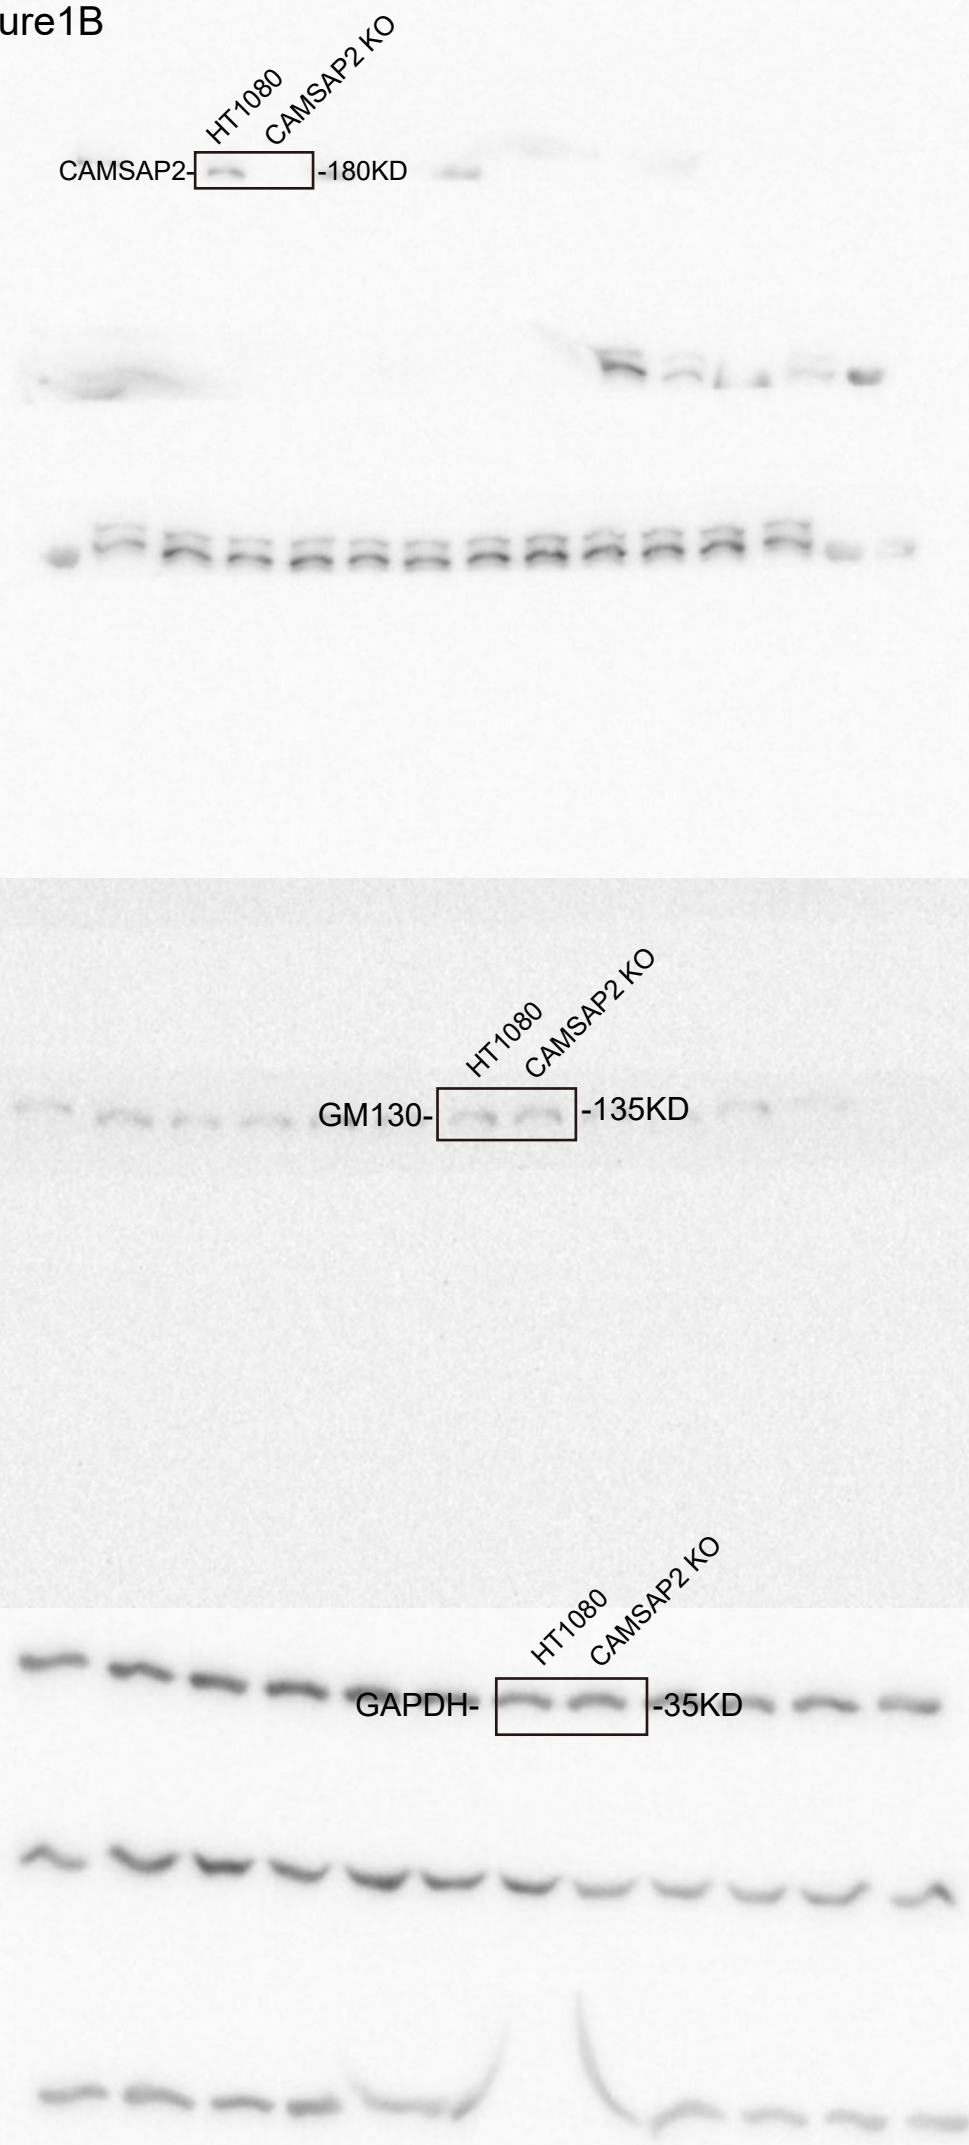

Supplement: fig1-figsupp1-data1 [file elife-105977-fig1-figsupp1-data1-v1.zip]

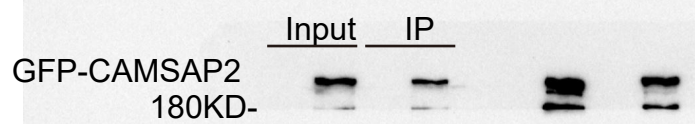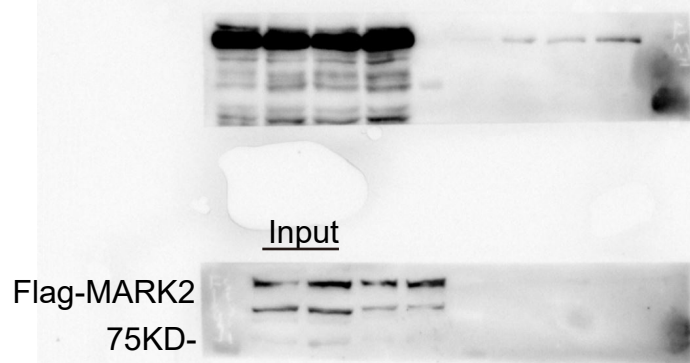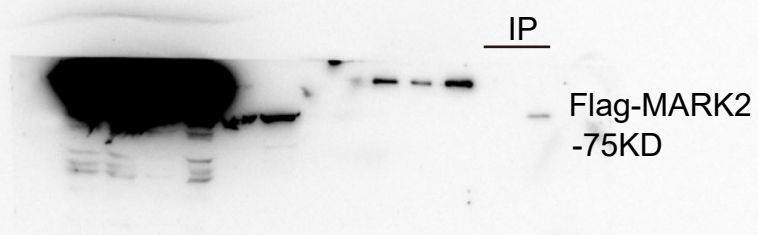

Supplement: fig2-data1 [file elife-105977-fig2-data1-v1.zip]

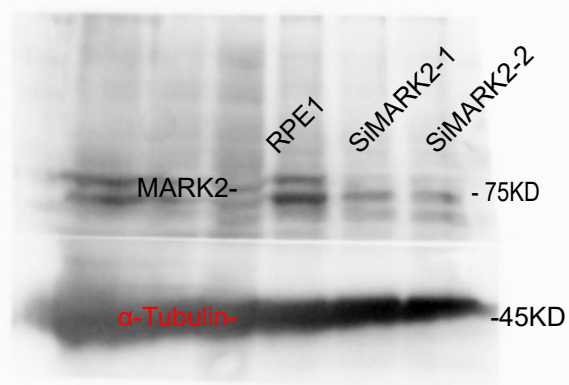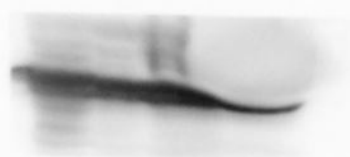

Supplement: fig2-figsupp1-data1 [file elife-105977-fig2-figsupp1-data1-v1.zip]

Supplementary figure3F

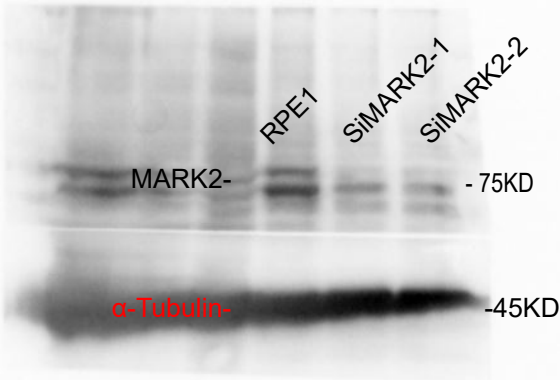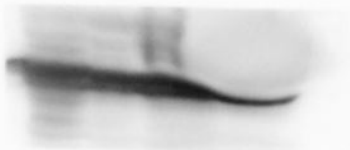

Supplement: fig2-figsupp1-data1 [file elife-105977-fig2-figsupp1-data1-v1.zip]

Supplement Figure3B

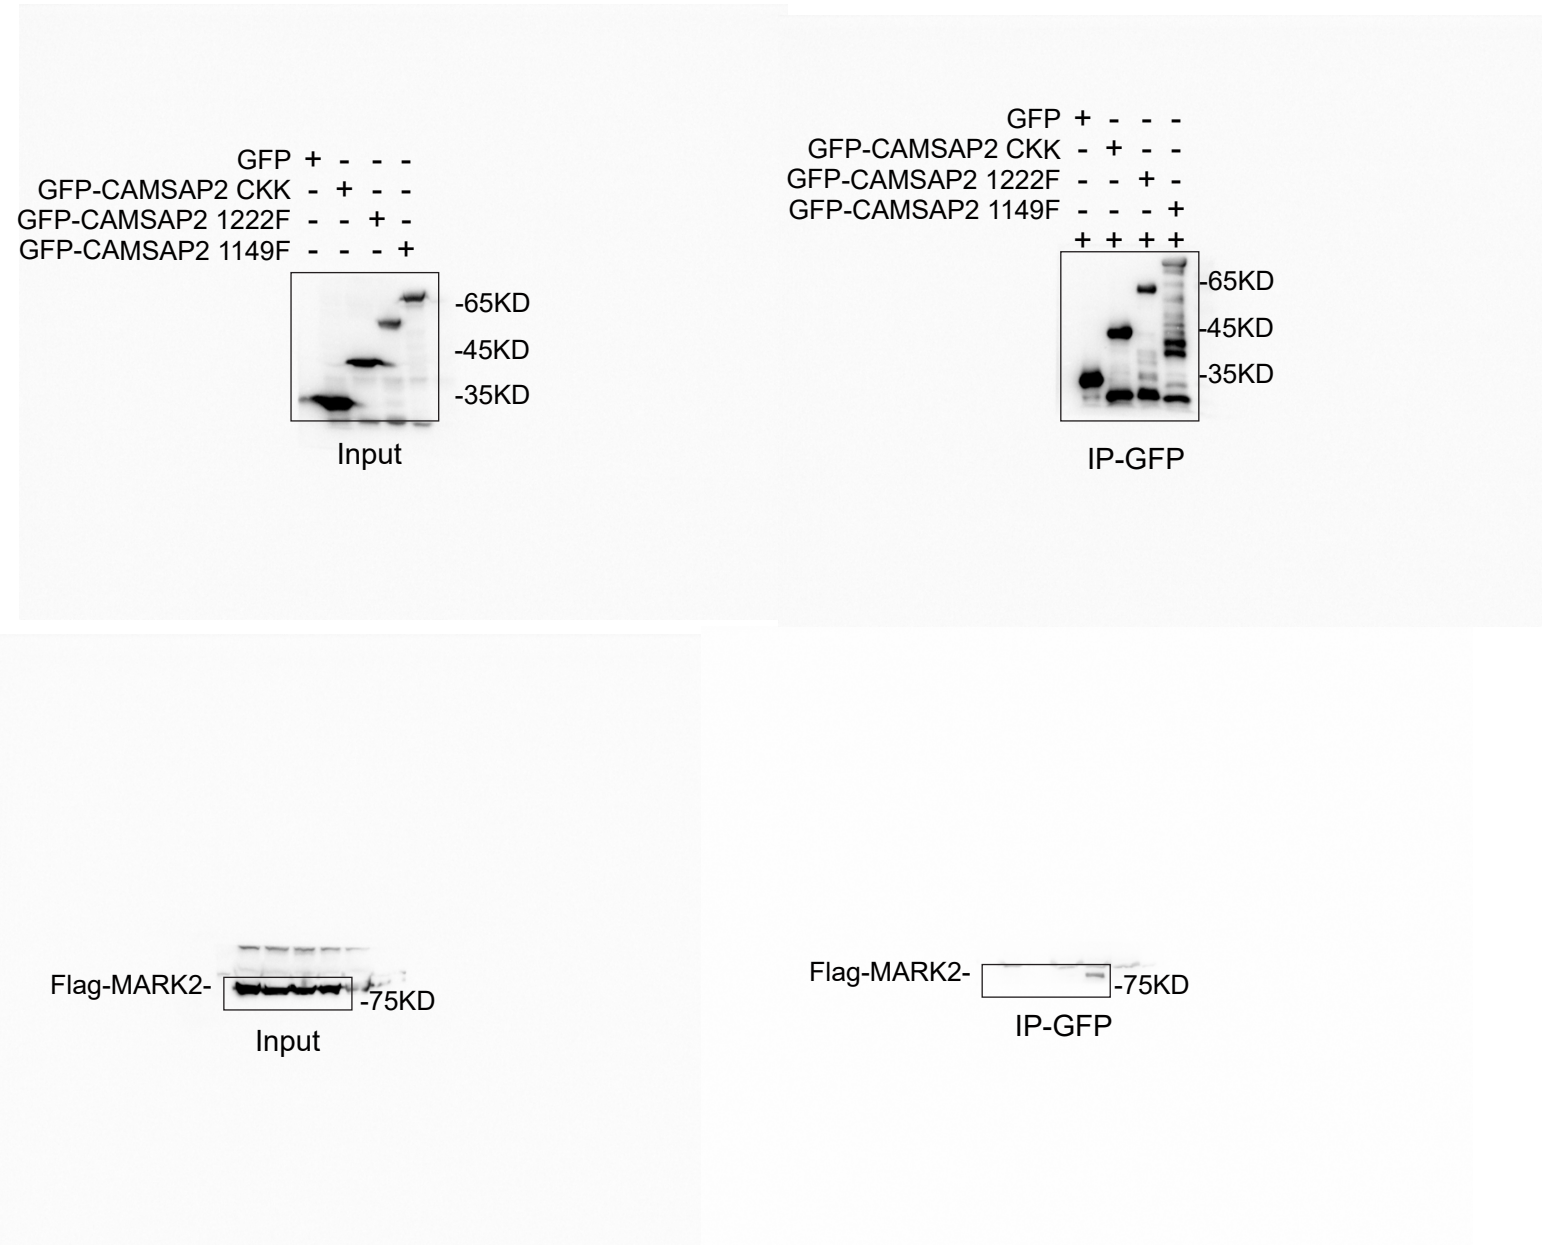

Supplement: fig2-figsupp1-data1 [file elife-105977-fig2-figsupp1-data1-v1.zip]

Figure3H

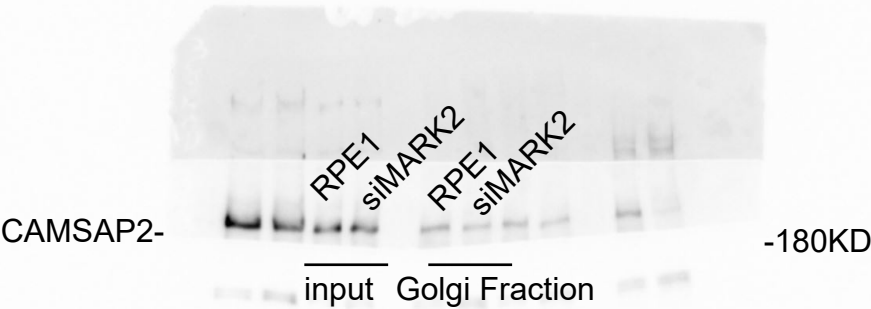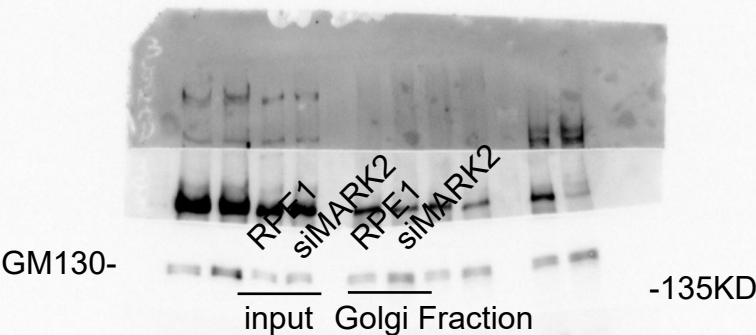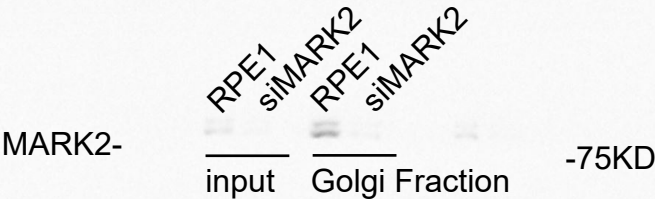

Supplement: fig3-data1 [file elife-105977-fig3-data1-v1.zip]

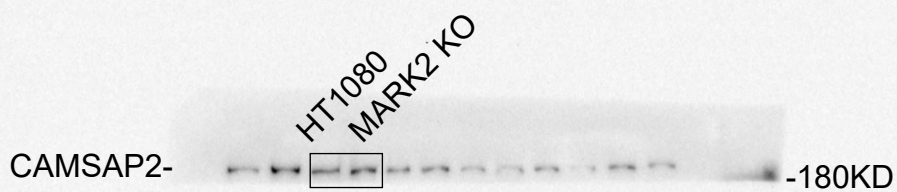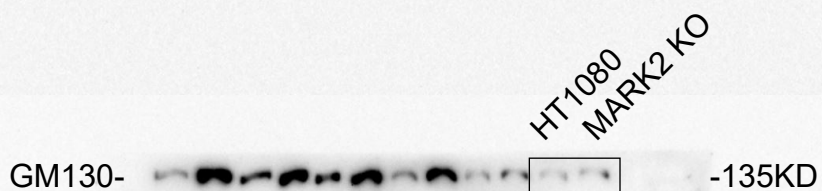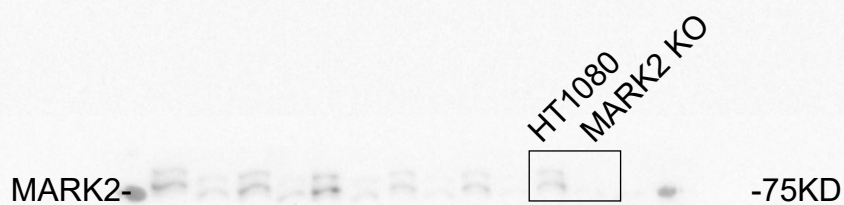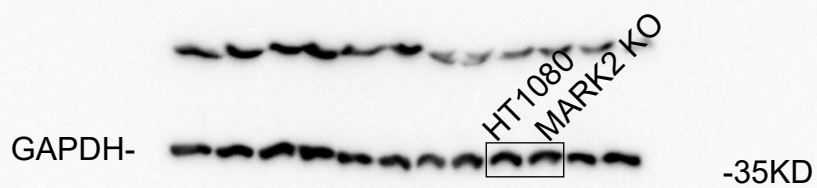

Supplement: fig3-data1 [file elife-105977-fig3-data1-v1.zip]

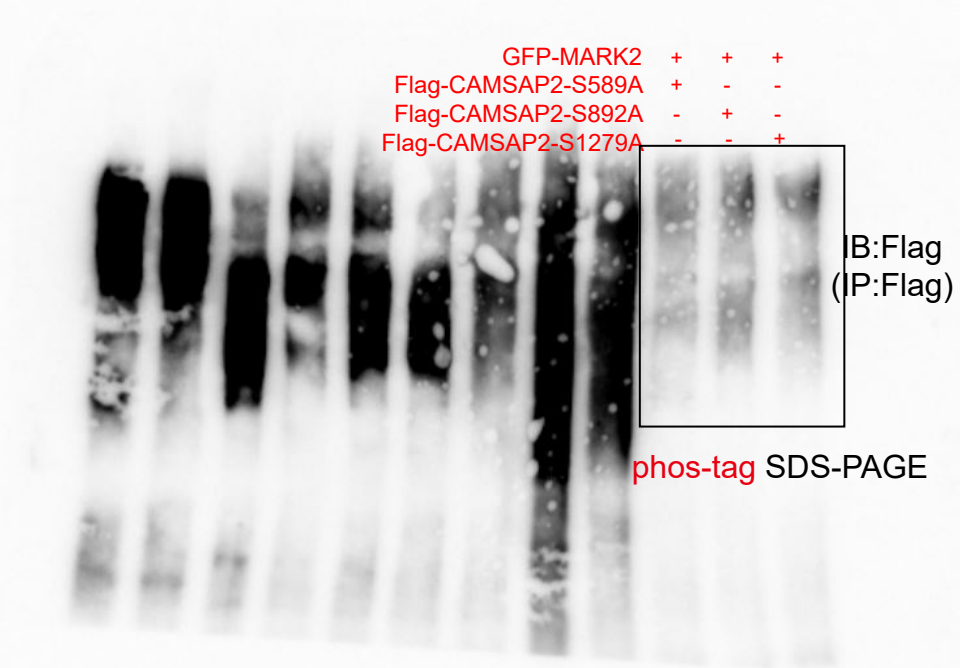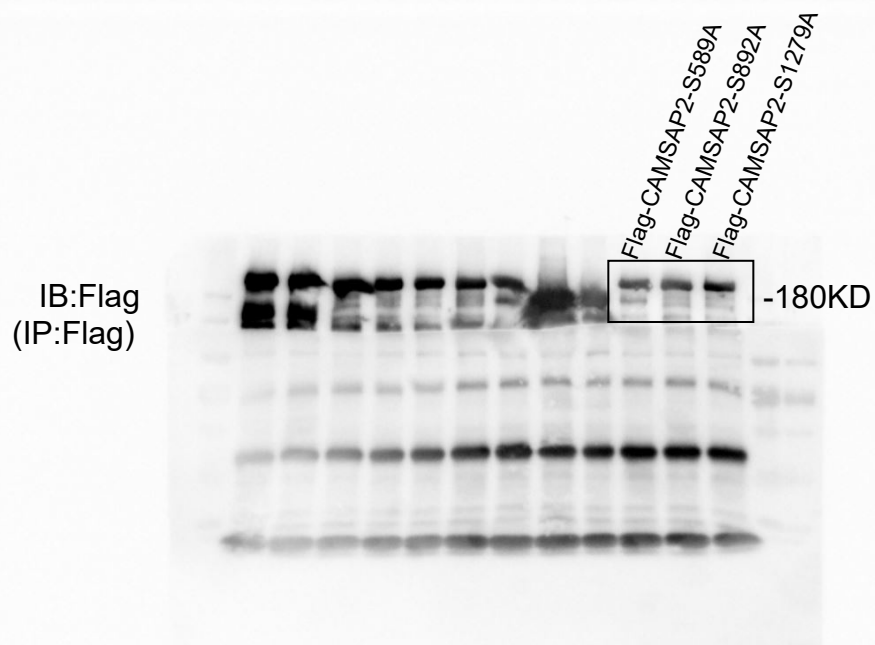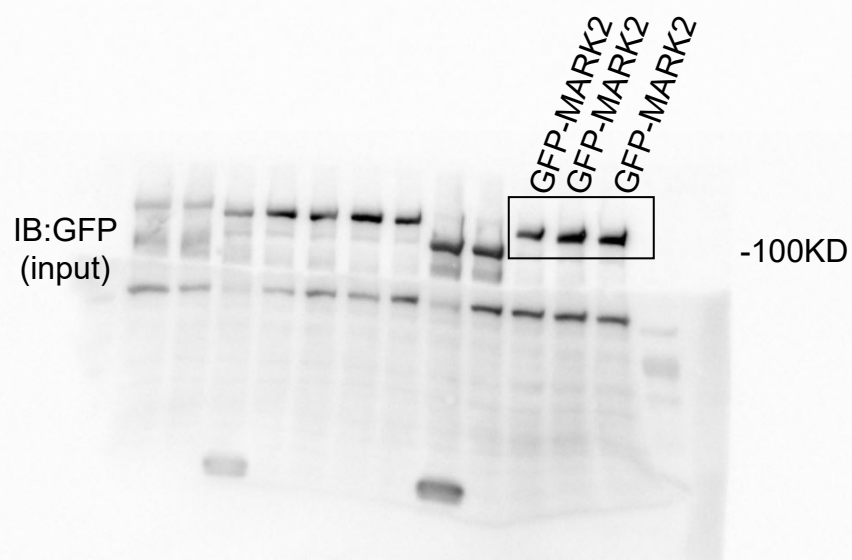

Supplement: fig3-figsupp1-data1 [file elife-105977-fig3-figsupp1-data1-v1.zip]

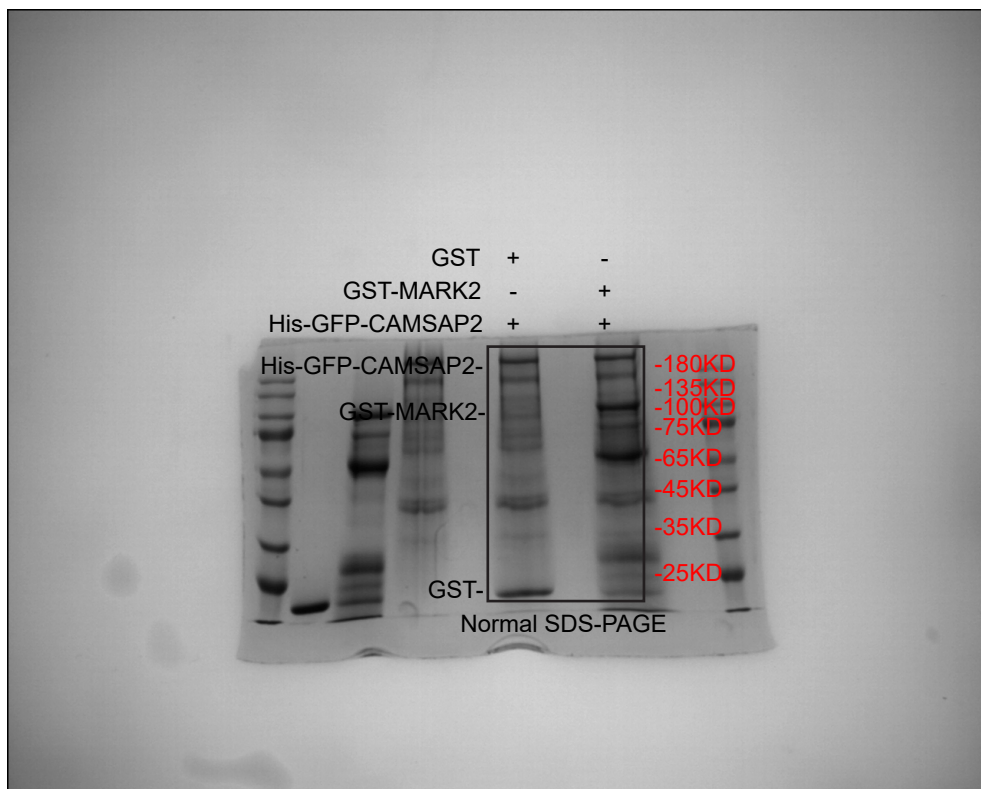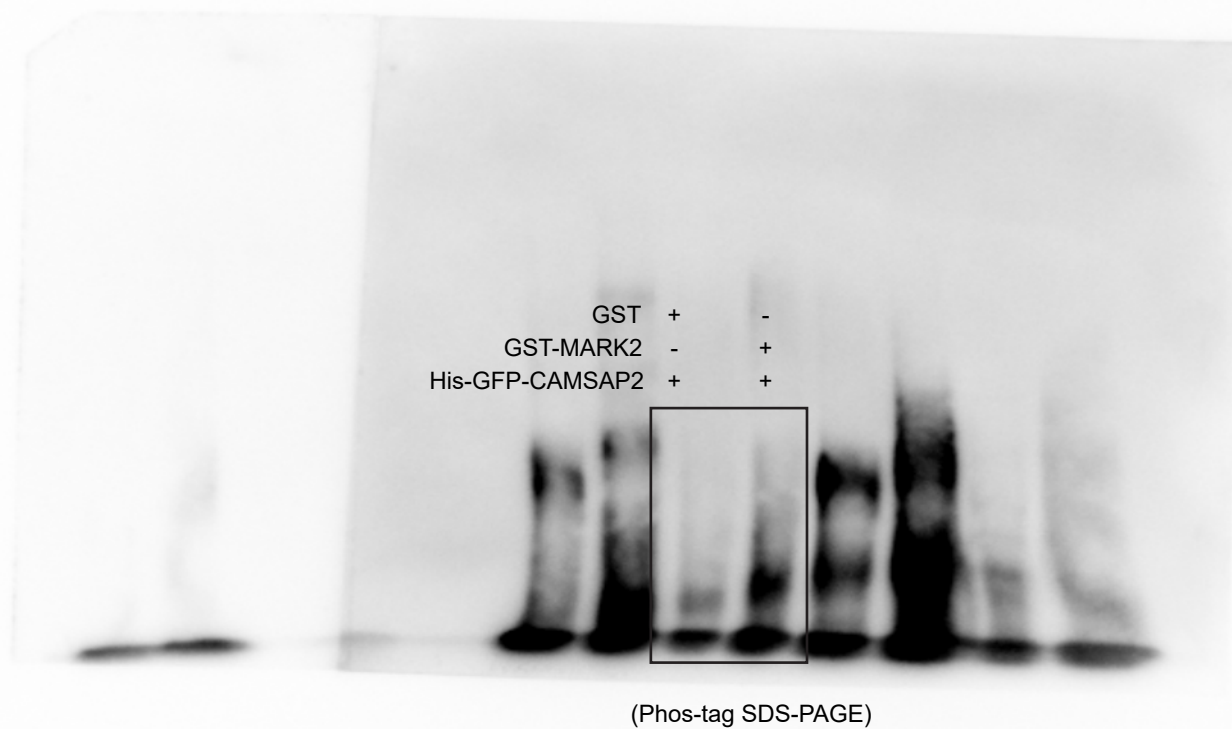

Supplement: fig3-figsupp1-data1 [file elife-105977-fig3-figsupp1-data1-v1.zip]

|                 |   |   |   |
|-----------------|---|---|---|
| GST             | + | - | - |
| GST-MARK2       | - | + | - |
| His-GFP-CAMSAP2 | - | - | + |

His-GFP-CAMSAP2-

GST-MARK2-

GST-

-180KD  
-135KD  
-100KD  
-75KD  
-65KD  
-45KD  
-35KD  
-25KD

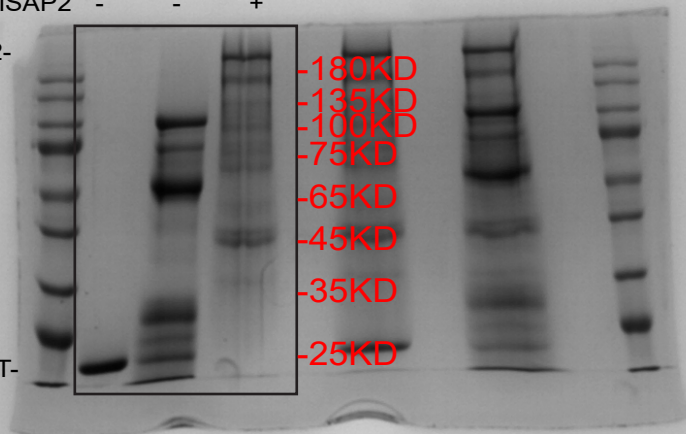

Supplement: fig3-figsupp1-data1 [file elife-105977-fig3-figsupp1-data1-v1.zip]

Figure 4B

|               |   |   |   |   |
|---------------|---|---|---|---|
| GFP           | + | - | - | - |
| GFP-MARK2     | - | + | + | + |
| Flag-CAMSAP2  | + | + | - | - |
| Flag-CS2-397A | - | - | + | - |
| Flag-CS2-835A | - | - | - | + |

IB:Flag  
(IP:Flag)

phos-tag SDS-PAGE

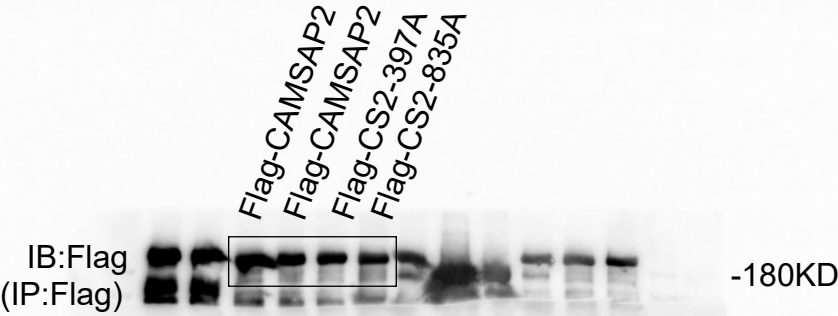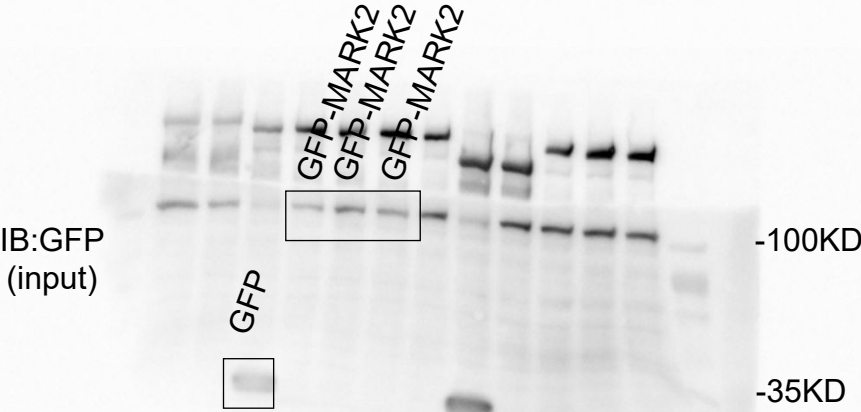

Supplement: fig4-data1 [file elife-105977-fig4-data1-v1.zip]

Figure5D

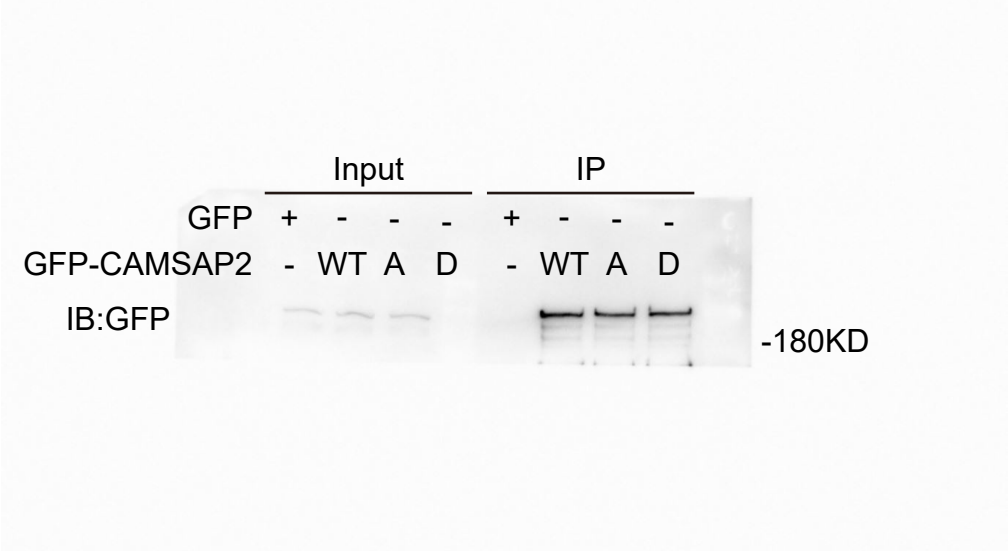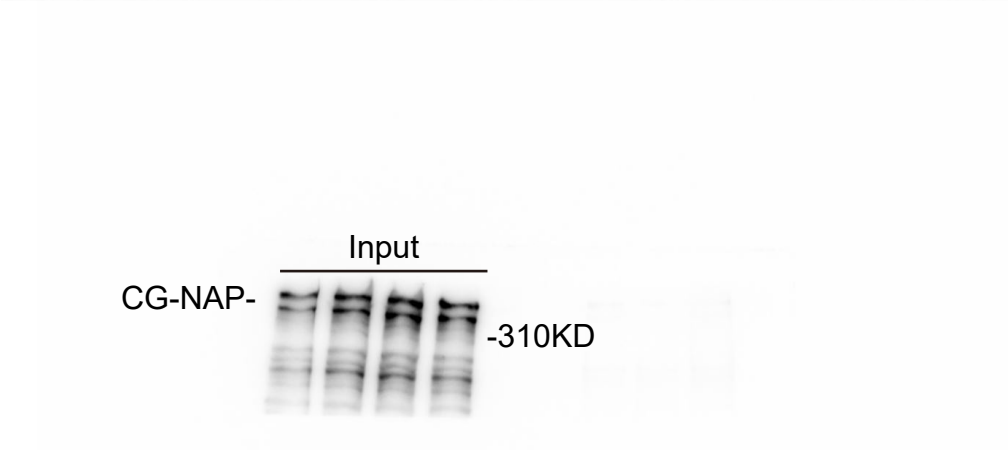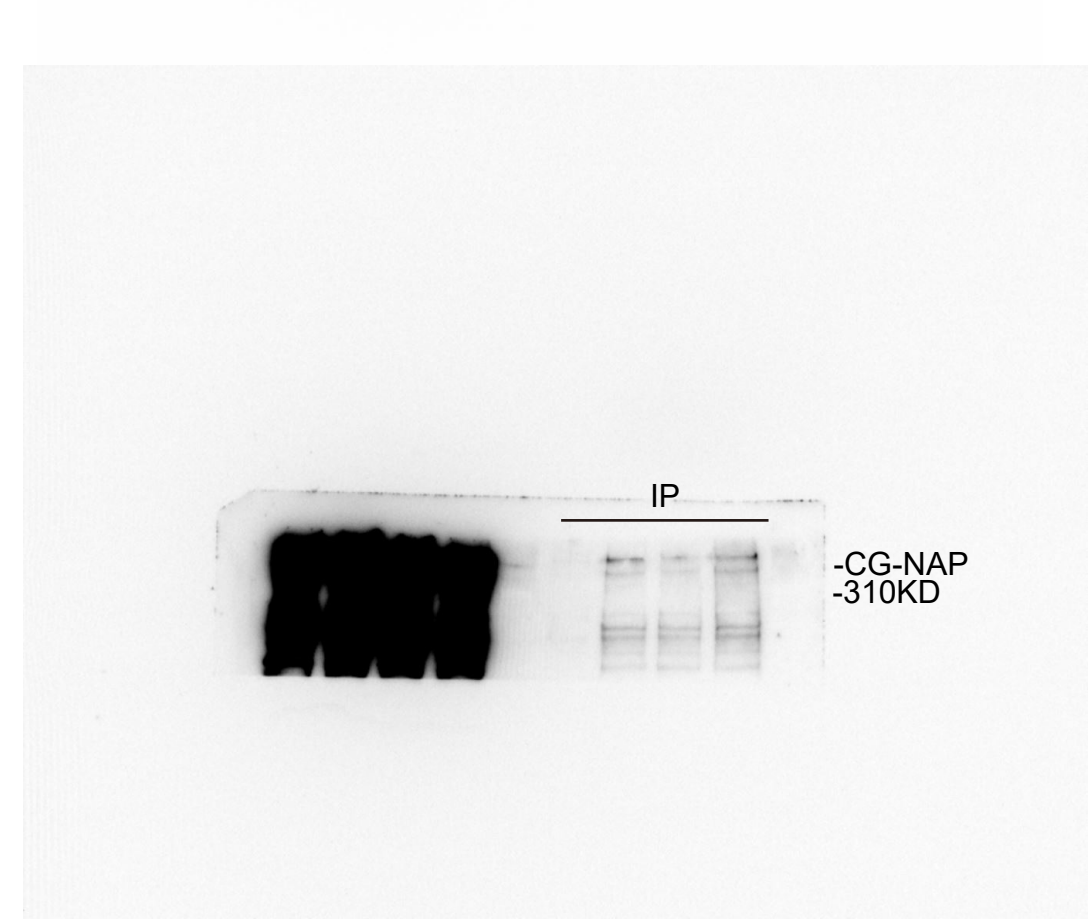

Supplement: fig5-data1 [file elife-105977-fig5-data1-v1.zip]

Figure 5F

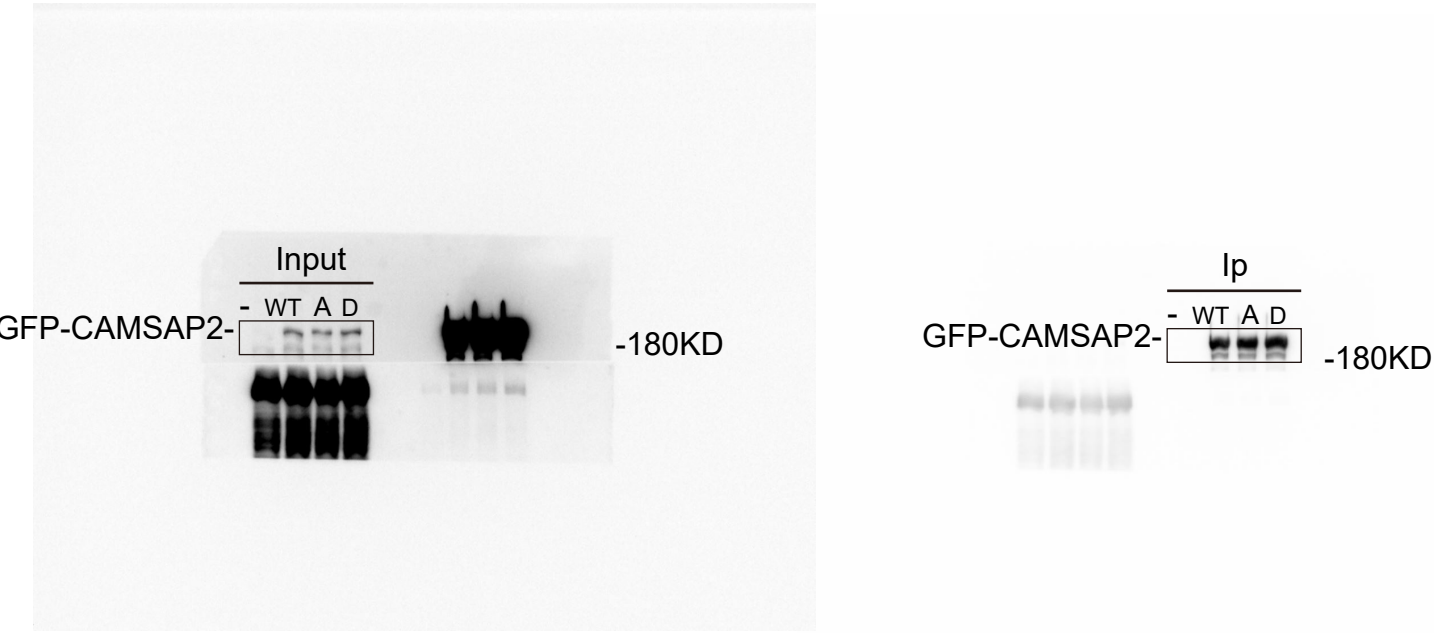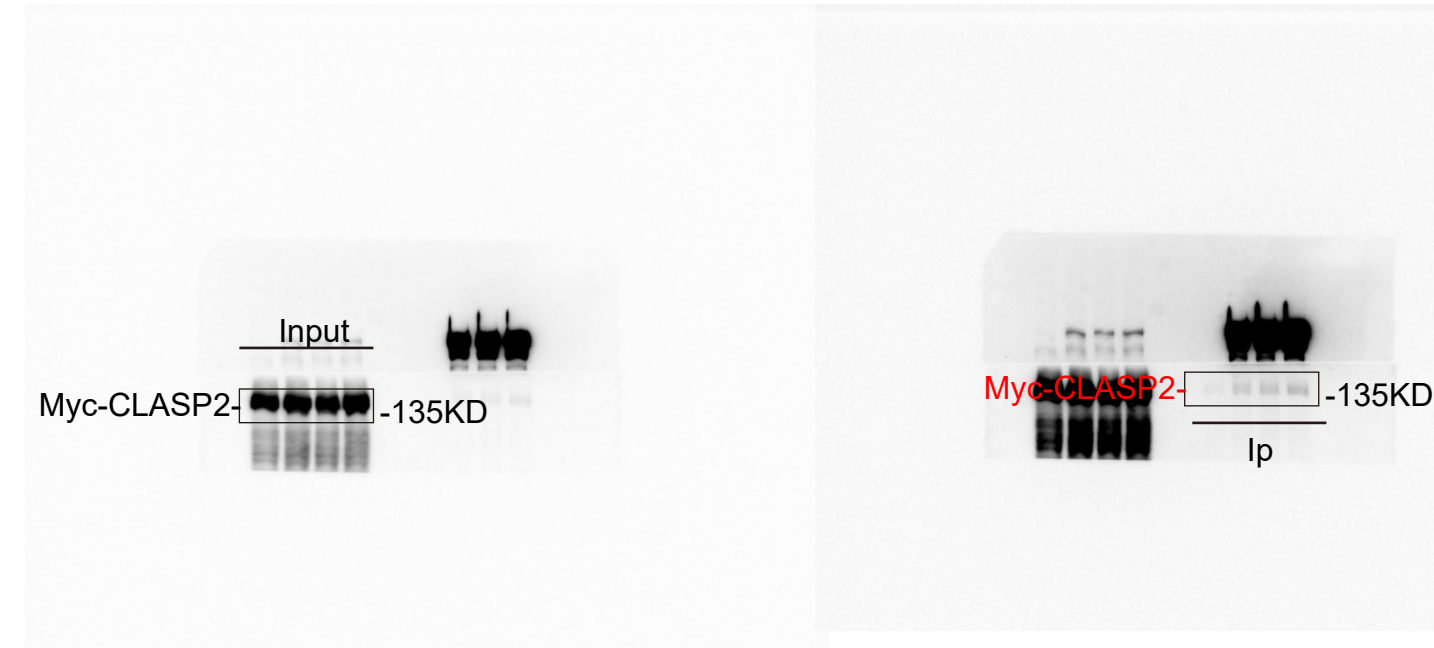

Supplement: fig5-data1 [file elife-105977-fig5-data1-v1.zip]

Supplementary figure5A

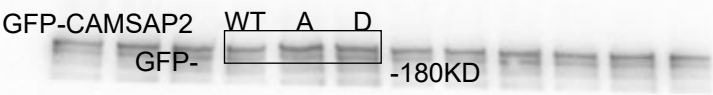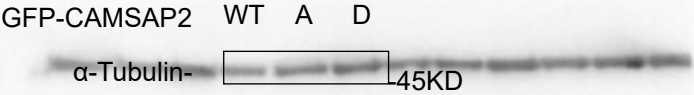

Supplement: fig5-figsupp1-data1 [file elife-105977-fig5-figsupp1-data1-v1.zip]

Figure6E

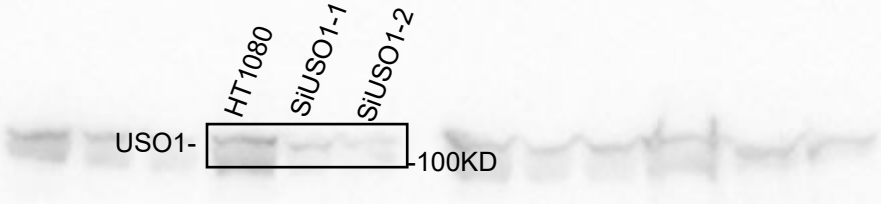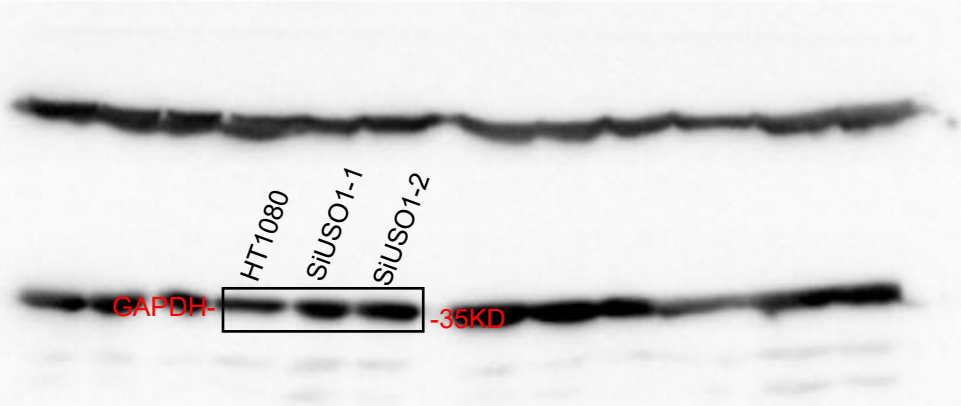

Supplement: fig6-data1 [file elife-105977-fig6-data1-v1.zip]

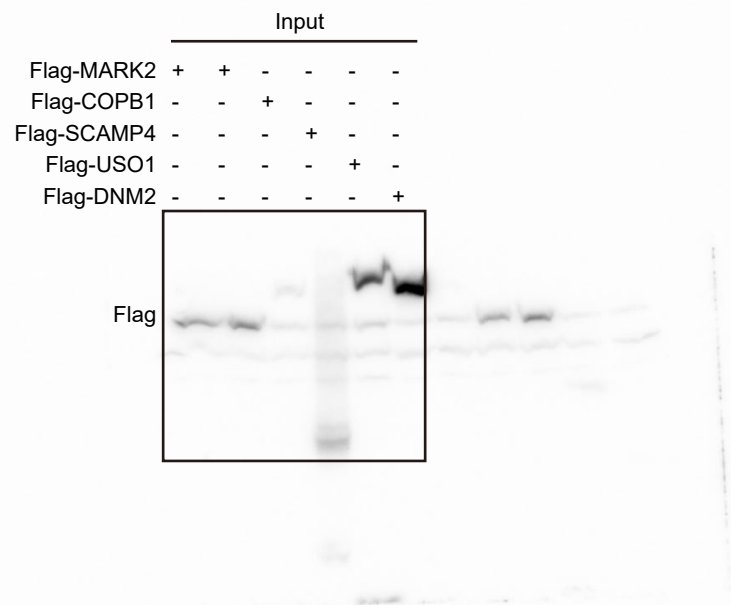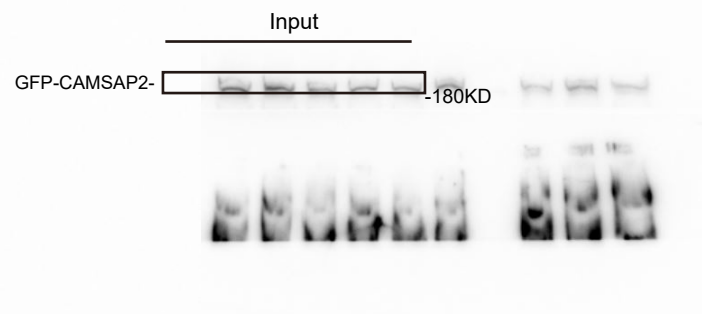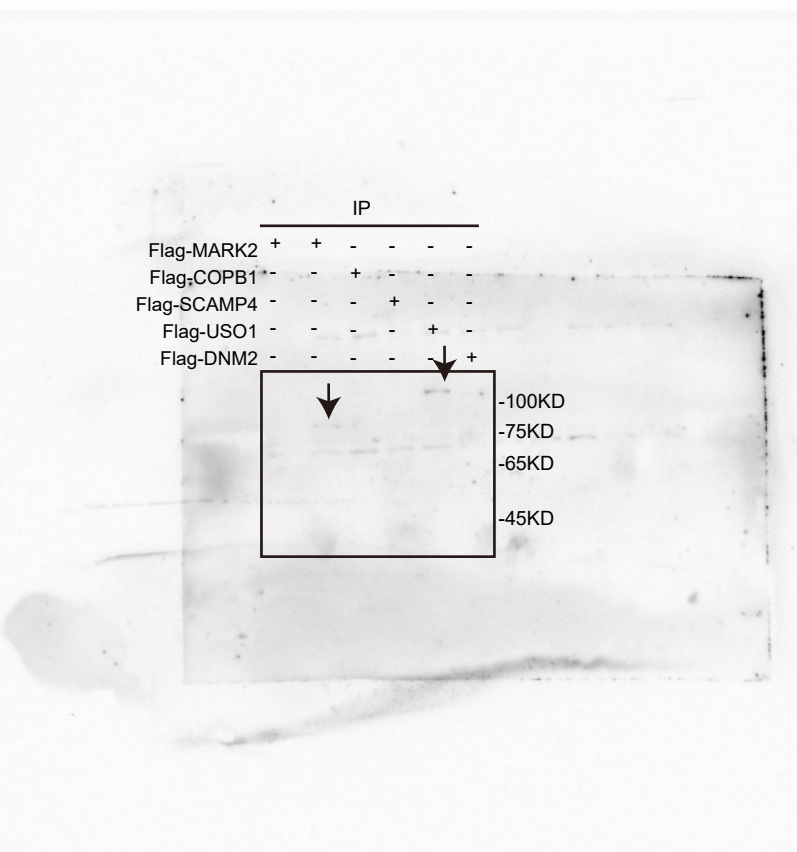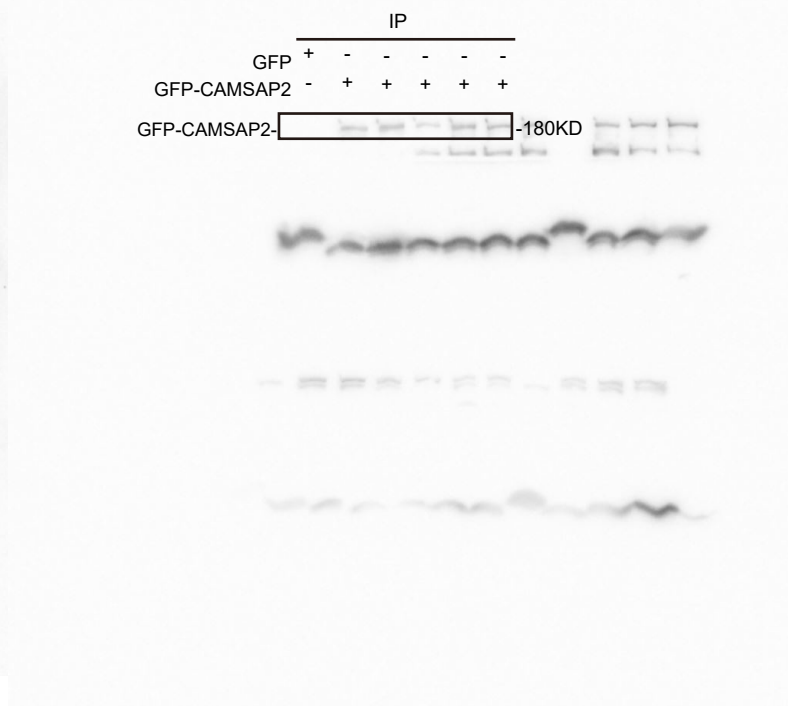

Supplement: fig6-figsupp1-data1 [file elife-105977-fig6-figsupp1-data1-v1.zip]

|                  |   |   |   |
|------------------|---|---|---|
| TurboID          | + | - | - |
| TurboID-CAMSAP2A | - | + | - |
| TurboID-CAMSAP2D | - | - | + |

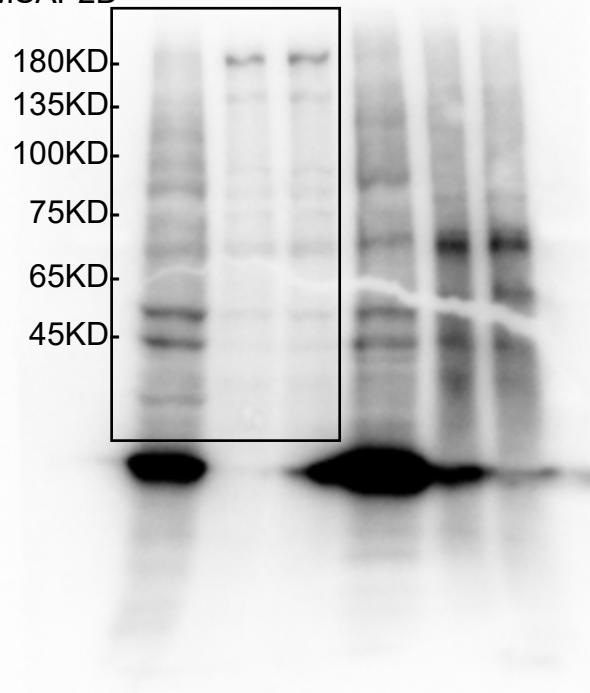

Supplement: fig6-figsupp1-data1 [file elife-105977-fig6-figsupp1-data1-v1.zip]

|             | Input |   |   |   |   |   |
|-------------|-------|---|---|---|---|---|
| GFP         | +     | - | - | - | - | - |
| GFP-CAMSAP2 | -     | + | - | - | - | - |
| GFP-CC1F    | -     | - | + | - | - | - |
| GFP-CC2F    | -     | - | - | + | - | - |
| GFP-CKK     | -     | - | - | - | + | - |
| GFP-N1      | -     | - | - | - | - | + |

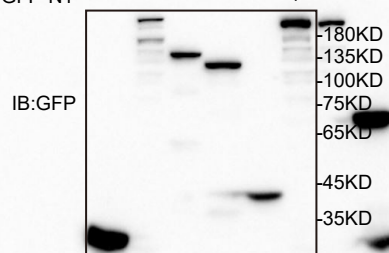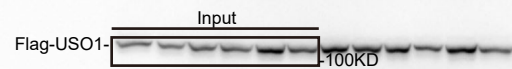

|             | IP |   |   |   |   |   |
|-------------|----|---|---|---|---|---|
| GFP         | +  | - | - | - | - | - |
| GFP-CAMSAP2 | -  | + | - | - | - | - |
| GFP-CC1F    | -  | - | + | - | - | - |
| GFP-CC2F    | -  | - | - | + | - | - |
| GFP-CKK     | -  | - | - | - | + | - |
| GFP-N1      | -  | - | - | - | - | + |

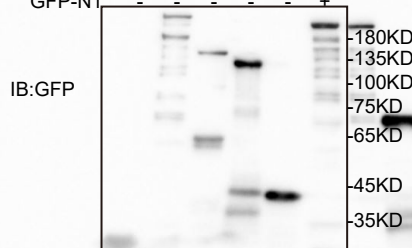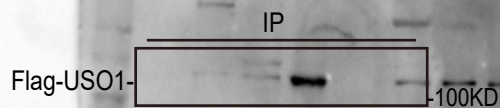

Supplement: fig6-figsupp1-data1 [file elife-105977-fig6-figsupp1-data1-v1.zip]
